# Supplementary material for: Conserved stress-responsive genes involved in the early development of Euterpe edulis
Source: Research Square preprint supplement (doi:10.21203/rs.3.rs-5678569/v1), 2025-05-05
Supplement: Supplementary file 1 [file 58e97066cd3d195e70f99563.xlsx]

## Sheet: Experimental design
Table 1. Experimental design.
Purpose	Specie	Cultivar	RUN / Link	Sample name	Material vegetal	Replica	Total base reads (raw datas)	Total reads (raw datas)	Total base reads (trimming data)	Total reads (trimming datas)	# of mapped reads (%)	Year	Reference	Tecnology	BioProject	Layout
genoma (1,8 Gb)	Elaeis guineensis	Deli dura, AVROS (pisífera), tenera	https://www.ncbi.nlm.nih.gov/datasets/genome/GCF_000442705.1/	SAMN02981535	Leaf and others (e.g. root, mesocarpo)	-	46,8 billions	53,5 millions	-	-	-	2013	Singh et al., 2013	Roche/454 and Sanger (Newbler v. 2.6)	PRJNA192219	PAIRED and SINGLE-END
RNASEQ	Euterpe edulis	UFES_250	-	UFES_250LP1	Leaf	1	6,660,850,090	44,111,590	6,174,651,606	42,797,258	22,514,861 (52,61%)	2024	Cardozo and Almeida et al., to be published	Illumina NovaSeq 6000 (TruSeq Stranded Total RNA Reference Guide)	PRJNA1200110	PAIRED-END
RNASEQ	Euterpe edulis	UFES_250	-	UFES_250LP3	Leaf	3	6,395,216,326	42,352,426	6,037,711,506	41,503,538	22,199,954 (53,49%)	2024	Cardozo and Almeida et al., to be published	Illumina NovaSeq 6000 (TruSeq Stranded Total RNA Reference Guide)	PRJNA1200110	PAIRED-END
RNASEQ	Euterpe edulis	Santa Marta	-	UFES_250RP1	Root	1	6,742,126,142	44,649,842	6,378,394,848	43,815,504	5,228,076 (11,93%)	2024	Cardozo and Almeida et al., to be published	Illumina NovaSeq 6000 (TruSeq Stranded Total RNA Reference Guide)	PRJNA1200110	PAIRED-END
RNASEQ	Euterpe edulis	Santa Marta	-	UFES_250RP2	Root	2	6,788,608,170	44,957,670	6,417,561,811	44,048,652	5,944,923 (13,5%	2024	Cardozo and Almeida et al., to be published	Illumina NovaSeq 6000 (TruSeq Stranded Total RNA Reference Guide)	PRJNA1200110	PAIRED-END
RNASEQ	Euterpe edulis	UFES_250	-	SMLP1	Leaf	1	6,742,123,122	44,649,822	6,428,353,280	43,866,492	23,577,761 (53,75%)	2024	Cardozo and Almeida et al., to be published	Illumina NovaSeq 6000 (TruSeq Stranded Total RNA Reference Guide)	PRJNA1200110	PAIRED-END
RNASEQ	Euterpe edulis	UFES_250	-	SMLP3	Leaf	3	6,590,641,130	43,646,630	6,183,982,141	42,874,678	25,297,764 (59,0%)	2024	Cardozo and Almeida et al., to be published	Illumina NovaSeq 6000 (TruSeq Stranded Total RNA Reference Guide)	PRJNA1200110	PAIRED-END
RNASEQ	Euterpe edulis	Santa Marta	-	SMRP1	Root	1	7,228,458,148	47,870,584	6,847,296,778	46,886,324	5,478,441 (11,68%)	2024	Cardozo and Almeida et al., to be published	Illumina NovaSeq 6000 (TruSeq Stranded Total RNA Reference Guide)	PRJNA1200110	PAIRED-END
RNASEQ	Euterpe edulis	Santa Marta	-	SMRP2	Root	2	6,211,217,088	41,133,888	5,874,501,624	40,311,356	5,116,788 (12,69%)	2024	Cardozo and Almeida et al., to be published	Illumina NovaSeq 6000 (TruSeq Stranded Total RNA Reference Guide)	PRJNA1200110	PAIRED-END
Transcriptome size: 781.951.815 pb

## Sheet: Expression_Profile_transcripts
Table 2. Expression profile of all mapped transcripts.
Transcript_ID	Gene_ID	Gene_Symbol	Description	RNAtype	Protein_ID	locus_tag	Transcript_Locus	Transcript_Length	EeLP1_Read_Count	EeLP3_Read_Count	EeRP1_Read_Count	EeRP2_Read_Count	EeRP3_Read_Count	EeSMLP1_Read_Count	EeSMLP3_Read_Count	EeSMRP1_Read_Count	EeSMRP2_Read_Count	EeSMRP3_Read_Count	EeLP1_FPKM	EeLP3_FPKM	EeRP1_FPKM	EeRP2_FPKM	EeRP3_FPKM	EeSMLP1_FPKM	EeSMLP3_FPKM	EeSMRP1_FPKM	EeSMRP2_FPKM	EeSMRP3_FPKM	EeLP1_TPM	EeLP3_TPM	EeRP1_TPM	EeRP2_TPM	EeRP3_TPM	EeSMLP1_TPM	EeSMLP3_TPM	EeSMRP1_TPM	EeSMRP2_TPM	EeSMRP3_TPM
rna-ElguCp010	12079377	trnR-UCU	tRNA-Arg	tRNA	.	ElguCp010	chrPltd:10411-10482	72	105	97	0	19	48	281	114	25	10	167	74.1222	70.0842	0	52.4714	106.995	196.357	71.2637	70.7481	31.0346	114.674	102.485	98.0932	0	90.6145	190.599	241.225	93.6619	139.347	58.5303	144.399
gene-ElguCp012	12079378	atpF	ATP synthase CF0 subunit I	Gene	YP_006073090.1	ElguCp012	chrPltd:12200-13559	555	39161	46471	13174	17987	20782	112305	98082	13064	12947	118761	3597.21	4363.91	5266.12	6486.95	6036.08	10201.6	7967.18	4931.99	5303.61	10587.1	4973.65	6107.93	9869.18	11202.5	10752.5	12532.6	10471.3	9714.18	10002.4	13331.4
gene-ElguCp014	12079379	atpI	ATP synthase CF0 subunit IV	Gene	YP_006073092.1	ElguCp014	chrPltd:15170-15913	744	14022	19012	4157	7732	9685	46190	22515	4703	4942	36686	960.795	1331.79	1239.34	2080.21	2098.31	3129.94	1364.27	1324.31	1509.97	2439.57	1328.44	1864.04	2322.63	3592.37	3737.88	3845.13	1793.07	2608.39	2847.75	3071.94
gene-ElguCp015	12079380	rps2	ribosomal protein S2	Gene	YP_006073093.1	ElguCp015	chrPltd:16169-16879	711	4910	6626	2377	3830	4949	10594	8731	3081	3081	10892	352.045	485.642	741.628	1078.2	1121.88	751.174	553.559	907.745	985.101	757.872	486.753	679.727	1389.88	1861.97	1998.49	922.815	727.542	1787.92	1857.87	954.324
rna-ElguCp019	12079381	trnC-GCA	tRNA-Cys	tRNA	.	ElguCp019	chrPltd:28628-28698	71	181	161	16	24	33	65	62	16	10	72	129.954	118.049	48.9192	67.0452	74.2946	45.7461	39.0799	45.3411	29.86	49.61	179.68	165.228	91.679	115.782	132.347	56.199	51.3627	89.305	56.3149	62.4697
gene-ElguCp020	12079382	petN	cytochrome b6/f complex subunit VIII	Gene	YP_006073097.1	ElguCp020	chrPltd:29450-29539	90	4527	4016	967	1514	1444	5883	4618	565	643	6586	2564.16	2325.5	2381.61	3365.27	2584.86	3294.96	2313.18	1314.79	1624.31	3620.53	3545.32	3254.88	4463.35	5811.59	4604.61	4047.85	3040.21	2589.65	3063.39	4559.03
gene-ElguCp021	12079383	psbM	photosystem II protein M	Gene	YP_006073098.1	ElguCp021	chrPltd:30082-30186	105	1203	1337	70	122	112	7145	1058	34	41	5274	583.877	663.17	147.651	232.244	171.575	3430.26	454.144	66.6442	86.6867	2484.96	807.294	928.203	276.711	401.069	305.64	4214.06	596.882	131.264	163.488	3129.1
rna-ElguCp022	12079384	trnD-GUC	tRNA-Asp	tRNA	.	ElguCp022	chrPltd:30995-31068	74	130	68	21	21	26	121	86	34	34	106	89.3496	47.5803	62.9387	55.0659	54.7784	81.8273	51.9961	93.7564	102.41	70.3698	123.539	66.5956	117.953	95.0949	97.581	100.525	68.3386	184.665	193.141	88.6107
rna-ElguCp023	12079385	trnY-GUA	tRNA-Tyr	tRNA	.	ElguCp023	chrPltd:31461-31544	84	862	618	111	112	157	1122	835	71	98	920	522.939	382.873	291.38	264.614	300.117	673.165	448.02	176.109	264.882	541.843	723.038	535.887	546.073	456.969	534.622	826.982	588.833	346.869	499.558	682.297
rna-ElguCp024	12079386	trnE-UUC	tRNA-Glu	tRNA	.	ElguCp024	chrPltd:31595-31667	73	558	391	67	88	111	634	471	57	61	637	389.416	278.462	203.378	239.442	244.374	437.439	290.334	161.873	187.225	431.706	538.423	389.748	381.148	413.5	435.321	537.393	381.586	318.83	353.101	543.61
rna-ElguCp025	12079387	trnT-GGU	tRNA-Thr	tRNA	.	ElguCp025	chrPltd:31952-32023	72	4	6	4	6	5	3	6	2	2	3	2.81118	4.26886	9.77448	15.8335	9.63788	1.91517	3.60346	4.39405	6.23202	1.62463	3.88686	5.9749	18.3182	27.3433	17.1687	2.35278	4.73603	8.65464	11.7534	2.04576
gene-ElguCp026	12079388	psbD	photosystem II protein D2	Gene	YP_006073099.1	ElguCp026	chrPltd:33031-34092	1062	321659	368063	2024	3100	2287	334047	222955	1438	1641	277490	15441.1	18062.8	422.621	584.121	347.018	15858	9464.55	283.659	351.146	12927.6	21349.6	25281.5	792.029	1008.74	618.169	19481.5	12439.3	558.701	662.25	16278.6
rna-ElguCp028	12079389	trnS-UGA	tRNA-Ser	tRNA	.	ElguCp028	chrPltd:35599-35691	93	133	148	12	7	4	195	187	9	4	126	72.8393	82.4803	26.9201	14.7241	5.70524	105.491	90.4542	19.5905	8.87244	66.6306	100.711	115.443	50.4507	25.4274	10.1632	129.596	118.884	38.5859	16.7331	83.9022
gene-ElguCp029	12079390	psbZ	photosystem II protein Z	Gene	YP_006073101.1	ElguCp029	chrPltd:36027-36215	189	9498	18478	392	755	623	52474	11992	330	451	28824	2561.76	5095.4	459.714	799.172	530.678	13997.2	2860.29	365.341	541.606	7545.28	3542	7131.76	861.545	1380.11	945.337	17195.5	3759.28	719.586	1021.45	9501.14
gene-ElguCp034	12079391	psaA	photosystem I P700 apoprotein A1	Gene	YP_006073104.1	ElguCp034	chrPltd:39698-41950	2253	492705	585195	8237	11411	10233	512054	513831	6337	8437	520097	11148.9	13537.1	811.01	1013.75	732.119	11458.3	10281.8	589.288	851.374	11421.4	15415	18947.2	1519.9	1750.68	1304.18	14076.5	13513.3	1160.68	1605.66	14382
gene-ElguCp035	12079392	ycf3	photosystem I assembly protein ycf3	Gene	YP_006073105.1	ElguCp035	chrPltd:42597-44561	513	11216	12856	3315	6914	6908	23483	20017	3646	3639	24468	1114.61	1306.09	1433.5	2697.69	2170.55	2307.79	1759.07	1489.13	1612.73	2359.81	1541.12	1828.06	2686.51	4658.72	3866.57	2835.11	2311.95	2933.03	3041.55	2971.51
gene-ElguCp037	12079393	rps4	ribosomal protein S4	Gene	YP_006073106.1	ElguCp037	chrPltd:45577-46182	606	1592	2032	728	1188	1619	2292	2014	712	878	1927	133.895	174.7	266.161	392.376	430.533	190.622	149.796	246.055	329.157	157.262	185.129	244.518	498.81	677.605	766.941	234.178	196.878	484.637	620.779	198.027
rna-ElguCp040	12079394	trnF-GAA	tRNA-Phe	tRNA	.	ElguCp040	chrPltd:48485-48557	73	20	8	5	5	8	12	1	4	1	7	13.5049	5.59809	13.8873	12.3843	16.3208	8.01309	0.556222	9.18094	0.90756	4.16528	18.6725	7.83535	26.026	21.3868	29.0735	9.84406	0.731043	18.083	1.71163	5.24498
gene-ElguCp041	12079395	ndhJ	NADH dehydrogenase subunit J	Gene	YP_006073107.1	ElguCp041	chrPltd:49261-49740	480	8391	10091	715	1215	1590	14025	12322	613	737	12265	891.143	1095.65	330.179	506.576	533.84	1473.04	1157.25	267.236	348.713	1264.14	1232.13	1533.53	618.785	874.821	950.97	1809.63	1520.97	526.356	657.661	1591.83
gene-ElguCp042	12079396	ndhK	NADH dehydrogenase subunit K	Gene	YP_006073108.1	ElguCp042	chrPltd:49825-50592	768	14439	20322	1757	2478	2732	21144	22757	1735	1807	25635	958.482	1379.02	507.502	645.589	573.407	1387.97	1335.81	473.224	534.846	1651.46	1325.24	1930.15	951.103	1114.89	1021.45	1705.12	1755.66	932.073	1008.7	2079.54
gene-ElguCp043	12079397	ndhC	NADH dehydrogenase subunit 3	Gene	YP_006073109.1	ElguCp043	chrPltd:50583-50945	363	6109	8022	708	1213	1396	10550	9232	729	853	10321	857.967	1151.66	432.637	668.837	619.547	1465.23	1146.49	420.393	533.96	1406.6	1186.26	1611.92	810.801	1155.03	1103.65	1800.03	1506.84	828.016	1007.03	1771.22
rna-ElguCp045	12079398	trnM-CAU	tRNA-Met	tRNA	.	ElguCp045	chrPltd:53639-53711	73	15	10	9	14	11	51	30	4	6	31	9.81649	6.63591	25.0776	37.7704	22.8725	35.071	18.2715	11.4239	17.1611	20.9431	13.5727	9.28793	46.9976	65.2267	40.7446	43.0846	24.0142	22.5008	32.3653	26.3719
gene-ElguCp049	12079399	accD	acetyl-CoA carboxylase carboxyltransferase beta subunit	Gene	YP_006073113.1	ElguCp049	chrPltd:58765-60243	1479	15601	18028	17221	34346	29501	34012	23270	13902	20579	31726	537.76	635.264	2583.14	4648.28	3215.41	1159.39	709.284	1969.38	3163.54	1061.31	743.53	889.145	4841.04	8027.25	5727.86	1424.31	932.213	3878.95	5966.33	1336.42
gene-ElguCp050	12079400	psaI	photosystem I subunit VIII	Gene	YP_006073114.1	ElguCp050	chrPltd:60806-60916	111	4916	6431	2418	4502	4203	13557	6154	1701	1965	11957	2257.44	3019.45	4831.9	8117	6103.16	6157.46	2499.07	3210.55	4023.16	5329.37	3121.24	4226.16	9055.41	14017.5	10872	7564.43	3284.53	6323.57	7587.55	6710.82
gene-ElguCp051	12079401	ycf4	photosystem I assembly protein Ycf4	Gene	YP_006073115.1	ElguCp051	chrPltd:61277-61831	555	14316	18282	1837	2712	2772	35869	25088	1912	2435	28886	1315.03	1716.75	733.96	977.879	805.127	3258.27	2037.82	721.66	997.337	2574.99	1818.22	2402.85	1375.51	1688.73	1434.23	4002.78	2678.31	1421.4	1880.94	3242.47
gene-ElguCp054	12079402	psbJ	photosystem II protein J	Gene	YP_006073118.1	ElguCp054	chrPltd:64933-65055	123	23044	21888	2018	2838	3615	53863	43187	2480	2442	44470	9551.08	9274.18	3639.85	4617.84	4737.83	22077.2	15829	4223.67	4512.35	17887.6	13205.7	12980.6	6821.4	7974.69	8439.85	27121.7	20804.1	8319.05	8510.13	22524.3
gene-ElguCp055	12079403	psbL	photosystem II protein L	Gene	YP_006073119.1	ElguCp055	chrPltd:65181-65297	117	12432	16256	1733	2452	2786	49922	25264	2168	2325	38964	5416.76	7241.29	3285.59	4193.28	3838.33	21511.4	9734.38	3881.26	4518.11	16476.7	7489.45	10135.2	6157.49	7241.5	6837.51	26426.7	12793.9	7644.62	8521	20747.7
gene-ElguCp056	12079404	psbF	photosystem II cytochrome b559 beta subunit	Gene	YP_006073120.1	ElguCp056	chrPltd:65320-65439	120	30504	32539	3018	3823	4770	60036	62076	3595	3755	60553	12959.2	14132	5578.82	6376.11	6407.47	25222.6	23321	6276.96	7112.84	24965.7	17917.9	19779.8	10455.2	11011.1	11414.1	30985.9	30650.8	12363.3	13414.6	31437.2
gene-ElguCp057	12079405	psbE	photosystem II cytochrome b559 alpha subunit	Gene	YP_006073121.1	ElguCp057	chrPltd:65451-65702	252	65403	68628	6258	7825	9958	122996	126864	8009	7898	128861	13231.3	14193.3	5509.22	6215.42	6369.95	24606.7	22695.8	6658.91	7125.71	25299.7	18294.1	19865.7	10324.8	10733.6	11347.3	30229.3	29829	13115.6	13438.8	31857.8
gene-ElguCp058	12079406	petL	cytochrome b6/f complex subunit VI	Gene	YP_006073122.1	ElguCp058	chrPltd:66614-66709	96	2644	3450	587	1558	1422	17703	3399	1085	918	12181	1403.69	1872.54	1356.1	3247.76	2386.24	9296.94	1596.1	2366.46	2172.37	6277.77	1940.81	2620.89	2541.45	5608.65	4250.8	11421.3	2097.76	4661.03	4097.01	7905.06
gene-ElguCp059	12079407	petG	cytochrome b6/f complex subunit V	Gene	YP_006073123.1	ElguCp059	chrPltd:66880-66993	114	8497	13130	1907	3592	4256	35833	12432	2861	2295	37358	3799.46	6002.5	3710.04	6306.82	6018.14	15846.5	4916.19	5257.59	4575.96	16213	5253.3	8401.39	6952.95	10891.4	10720.6	19467.4	6461.35	10355.5	8630.1	20415.7
rna-ElguCp060	12079408	trnW-CCA	tRNA-Trp	tRNA	.	ElguCp060	chrPltd:67113-67186	74	233	314	69	140	145	614	319	122	97	921	160.106	220.487	206.586	377.239	315.759	417.908	193.79	343.055	296.221	615.321	221.37	308.604	387.16	651.465	562.485	513.399	254.698	675.689	558.662	774.822
rna-ElguCp061	12079409	trnP-UGG	tRNA-Pro	tRNA	.	ElguCp061	chrPltd:67344-67417	74	39	18	5	18	13	63	30	15	13	67	26.4988	12.1829	12.6672	47.4527	28.2476	42.7726	17.9136	42.0779	37.8873	44.6321	36.6384	17.0518	23.7394	81.9475	50.3196	52.546	23.5439	82.8777	71.4541	56.2015
gene-ElguCp062	12079410	psaJ	photosystem I subunit IX	Gene	YP_006073124.1	ElguCp062	chrPltd:67827-67961	135	4477	5345	2702	4062	4639	19792	11144	2531	2625	20874	1690.6	2063.11	4439.78	6021.92	5538.91	7391.02	3721.27	3927.25	4419.8	7650	2337.5	2887.63	8320.54	10399.4	9866.88	9079.85	4890.87	7735.22	8335.59	9633
gene-ElguCp063	12079411	rpl33	50S ribosomal protein L33	Gene	YP_006073125.1	ElguCp063	chrPltd:68513-68713	201	874	1268	1057	1752	1758	2311	2225	1037	1222	2973	221.44	328.64	1166.39	1744.5	1409.77	579.56	498.848	1080.92	1381.5	731.799	306.173	459.98	2185.91	3012.62	2511.34	711.989	655.637	2129	2605.46	921.493
gene-ElguCp064	12079412	rps18	ribosomal protein S18	Gene	YP_006073126.1	ElguCp064	chrPltd:68978-69283	306	2748	4186	1925	3958	3789	7769	4248	2206	2634	6904	457.701	712.896	1395.18	2589.04	1995.85	1279.86	625.736	1510.35	1957.1	1116.29	632.838	997.802	2614.7	4471.08	3555.36	1572.3	822.405	2974.83	3691.02	1405.64
gene-ElguCp065	12079413	rpl20	ribosomal protein L20	Gene	YP_006073127.1	ElguCp065	chrPltd:69557-69910	354	425	881	667	1135	1521	2024	1002	1060	1165	2173	61.0887	129.586	417.544	641.737	692.232	288.117	127.521	627.252	747.864	303.628	84.4639	181.375	782.515	1108.24	1233.13	353.951	167.601	1235.45	1410.45	382.334
gene-ElguCp127	12079414	rps12	ribosomal protein S12	Gene	YP_006073128.1	ElguCp127	chrPltd:70622-142771	399	4298	6148	3180	4996	5188	7144	6564	3343	3017	6460	549.06	803.034	1767.89	2506.05	2096.05	902.555	741.567	1755.43	1719.03	801.018	759.154	1123.96	3313.18	4327.78	3733.86	1108.79	974.641	3457.54	3242.02	1008.65
gene-ElguCp066	12079415	clpP	clp protease proteolytic subunit	Gene	YP_006073129.1	ElguCp066	chrPltd:70876-72958	615	13456	14737	33162	44487	59183	33350	26624	29747	26676	34149	1115.42	1248.8	11962.7	14478.9	15513	2733.85	1951.62	10134.6	9862.01	2747.18	1542.22	1747.88	22419.2	25004.1	27634.5	3358.53	2565.02	19961.3	18599.4	3459.29
gene-ElguCp069	12079416	psbN	photosystem II protein N	Gene	YP_006073132.1	ElguCp069	chrPltd:75308-75439	132	4306	3605	307	504	342	5384	3497	199	213	4394	1662.88	1423.26	515.856	764.095	416.947	2056.21	1194.21	314.837	366.781	1646.94	2299.17	1992.06	966.761	1319.54	742.739	2526.05	1569.54	620.111	691.736	2073.85
gene-ElguCp070	12079417	psbH	photosystem II phosphoprotein	Gene	YP_006073133.1	ElguCp070	chrPltd:75548-75769	222	12913	20236	410	631	512	26094	29667	411	375	31270	2965.32	4750.65	409.433	568.781	371.523	5925.82	6024.42	387.114	384.041	6968.89	4099.99	6649.23	767.313	982.245	661.822	7279.86	7917.9	762.47	724.288	8775.33
gene-ElguCp071	12079418	petB	cytochrome b6	Gene	YP_006073134.1	ElguCp071	chrPltd:75903-77354	654	152024	0	9373	15184	18538	0	218177	10103	9758	0	11850.6	0	3179.49	4646.96	4569.23	0	15039.7	3236.66	3392.24	0	16385.2	0	5958.64	8024.97	8139.52	0	19766.7	6375	6397.65	0
gene-ElguCp072	12079419	petD	cytochrome b6/f complex subunit IV	Gene	YP_006073135.1	ElguCp072	chrPltd:77568-78821	522	76003	90539	3372	5862	6439	140536	114774	4437	4013	141847	7422.76	9039.63	1432.83	2247.8	1988.44	13573.1	9912.45	1780.69	1747.79	13444.5	10263	12652.3	2685.26	3881.79	3542.15	16674.6	13027.9	3507.29	3296.28	16929.6
gene-ElguCp074	12079420	rps11	ribosomal protein S11	Gene	YP_006073137.1	ElguCp074	chrPltd:80096-80512	417	8873	9988	4760	8112	9578	13436	14571	7128	6943	14846	1084.72	1248.24	2532.22	3893.63	3702.63	1624.36	1575.23	3581.11	3785.11	1761.39	1499.78	1747.1	4745.61	6724.02	6595.77	1995.52	2070.33	7053.45	7138.6	2217.97
gene-ElguCp075	12079421	rpl36	ribosomal protein L36	Gene	YP_006073138.1	ElguCp075	chrPltd:80649-80762	114	1190	1651	1052	2014	2344	3600	1845	1528	1654	2788	532.014	754.52	2047.25	3535.33	3314.29	1591.9	729.549	2808.25	3297.51	1209.71	735.586	1056.06	3836.72	6105.26	5904.01	1955.65	958.847	5531.2	6218.99	1523.28
gene-ElguCp076	12079422	infA	translational initiation factor 1	Gene	YP_006073139.1	ElguCp076	chrPltd:80881-81114	234	4283	5273	2884	5460	5876	7375	6415	3928	4428	7921	932.964	1174.37	2734.29	4670.35	4047.83	1588.9	1235.83	3516.42	4302.25	1674.66	1289.96	1643.71	5124.29	8065.37	7210.7	1951.96	1624.26	6926.04	8113.9	2108.76
gene-ElguCp077	12079423	rps8	ribosomal protein S8	Gene	YP_006073140.1	ElguCp077	chrPltd:81231-81629	399	4578	8063	5013	8709	9738	12900	8150	6809	7325	12135	584.828	1053.1	2786.89	4368.75	3934.15	1629.89	920.833	3575.52	4173.96	1504.7	808.609	1473.97	5222.87	7544.52	7008.21	2002.32	1210.25	7042.43	7871.95	1894.74
gene-ElguCp078	12079424	rpl14	ribosomal protein L14	Gene	YP_006073141.1	ElguCp078	chrPltd:81805-82173	369	4327	6049	4668	8555	9470	7675	6792	6300	7060	6775	597.731	854.315	2806.27	4640.21	4137.08	1048.54	829.7	3576.98	4350.1	908.321	826.449	1195.74	5259.2	8013.32	7369.71	1288.13	1090.48	7045.3	8204.13	1143.77
gene-ElguCp079	12079425	rpl16	50S ribosomal protein L16	Gene	YP_006073142.1	ElguCp079	chrPltd:82307-83885	408	6848	9629	7931	14186	15025	10089	13163	10819	11428	12093	855.625	1229.9	4312.29	6959.37	5936.26	1246.63	1454.46	5555.9	6368.1	1466.38	1183.02	1721.42	8081.61	12018.3	10574.7	1531.48	1911.6	10943	12010	1846.49
gene-ElguCp080	12079426	rps3	ribosomal protein S3	Gene	YP_006073143.1	ElguCp080	chrPltd:84048-84713	666	7425	10072	10333	18313	18387	23379	18417	12953	13426	22521	568.348	788.113	3441.9	5503.71	4450.45	1769.7	1246.64	4074.92	4583.21	1673.03	785.822	1103.08	6450.42	9504.52	7927.93	2174.07	1638.46	8026.06	8643.77	2106.7
gene-ElguCp081	12079427	rpl22	50S ribosomal protein L22	Gene	YP_006073144.1	ElguCp081	chrPltd:84766-85167	402	1403	2375	2893	4442	5319	5710	4029	3298	3661	5211	177.823	307.855	1596.16	2211.73	2132.92	716.013	451.743	1718.87	2070.16	641.248	245.866	430.888	2991.34	3819.51	3799.53	879.62	593.726	3385.53	3904.25	807.469
gene-ElguCp082	12079428	rps19	ribosomal protein S19	Gene	YP_006073145.1	ElguCp082	chrPltd:85311-85589	279	742	1048	1793	2860	2881	3349	2751	2864	3435	3190	135.513	195.694	1425.49	2051.79	1664.46	605.146	444.389	2150.67	2798.5	565.586	187.366	273.903	2671.5	3543.3	2965.03	743.421	584.061	4236.01	5277.88	712.194
rna-ElguCp083	12079429	trnH-GUG	tRNA-His	tRNA	.	ElguCp083	chrPltd:85723-85796	74	154	164	242	352	335	326	390	397	432	189	105.911	115.449	725.245	950.236	729.215	221.601	237.315	1123.39	1325.93	125.94	146.437	161.588	1359.17	1640.99	1299.01	272.236	311.903	2212.66	2500.66	158.585
gene-ElguCp084	12079430	rpl2	ribosomal protein L2	Gene	YP_006073146.1	ElguCp084	chrPltd:85843-87326	822	4099	5628	5462	6996	7314	8807	12032	8258	9104	9214	254.163	356.837	1474.05	1703.36	1434.19	540.132	659.878	2104.92	2518.01	554.568	351.417	499.446	2762.51	2941.58	2554.84	663.552	867.278	4145.9	4748.88	698.32
gene-ElguCp085	12079431	rpl23	ribosomal protein L23	Gene	YP_006073147.1	ElguCp085	chrPltd:87345-87626	282	2120	2752	1316	1809	2014	3705	4041	1730	1892	3960	383.18	508.466	1035.14	1283.64	1151.01	662.261	646.013	1284.75	1524.83	694.72	529.801	711.673	1939.94	2216.75	2050.38	813.587	849.055	2530.48	2875.77	874.803
rna-ElguCp086	12079432	trnM-CAU	tRNA-Met	tRNA	.	ElguCp086	chrPltd:87787-87860	74	55	62	45	62	90	59	61	36	41	56	37.6563	43.4752	134.693	167.598	194.098	39.903	36.9085	99.2881	124.934	36.8569	52.0653	60.8499	252.426	289.43	345.761	49.0208	48.5089	195.56	235.622	46.4108
gene-ElguCp087	12079433	ycf2	hypothetical protein RF2	Gene	YP_006073148.1	ElguCp087	chrPltd:87929-94798	6870	5396	7801	6642	10216	11315	5811	4467	6280	7177	5628	40.0419	59.1798	214.468	297.63	265.505	42.6379	29.3115	191.52	237.523	40.5276	55.3637	82.8308	401.933	513.986	472.965	52.3806	38.5241	377.223	447.961	51.033
rna-ElguCp089	12079435	trnL-CAA	tRNA-Leu	tRNA	.	ElguCp089	chrPltd:95678-95758	81	42	53	5	5	7	40	44	8	10	35	25.9754	33.7315	11.8264	10.1138	13.4831	24.7184	24.4512	19.1694	26.1085	21.0901	35.9148	47.2121	22.1638	17.4658	24.0186	30.3665	32.1362	37.7565	49.2397	26.557
gene-ElguCp090	12079436	ndhB	NADH dehydrogenase subunit 2	Gene	YP_006073149.1	ElguCp090	chrPltd:96322-98557	1533	12052	19095	2639	3662	3594	27217	18722	3246	2680	22921	400.786	649.15	381.816	478.036	377.884	895.082	550.566	443.573	397.378	739.73	554.145	908.58	715.557	825.535	673.154	1099.61	723.609	873.673	749.442	931.479
rna-ElguCp093	12079437	trnV-GAC	tRNA-Val	tRNA	.	ElguCp093	chrPltd:102059-102130	72	161	173	46	60	56	177	56	35	35	119	113.47	125.161	139.455	164.779	123.75	123.881	34.6123	101.747	109.259	81.5911	156.889	175.181	261.35	284.561	220.446	152.187	45.4909	200.404	206.059	102.741
rna-ElguCp094	12079438	rrn16	16S ribosomal RNA	rRNA	.	ElguCp094	chrPltd:102363-103853	1491	153	958	36	89	35	3937	43	33	4	3347	5.22378	33.483	5.20883	11.9437	3.68749	133.098	1.28883	4.59507	0.465047	111.064	7.22263	46.8644	9.76181	20.6259	6.5688	163.511	1.69391	9.05057	0.877063	139.853
rna-ElguCp097	12079440	trnA-UGC	tRNA-Ala	tRNA	.	ElguCp097	chrPltd:105248-106120	73	3864	3741	0	288	184	3974	1789	250	0	2326	2698.32	2670.76	0	787.63	405.308	2744.1	1104.72	716.379	0	1575.94	3730.81	3738.12	0	1360.18	722.006	3371.12	1451.93	1411	0	1984.45
rna-ElguCp099	12079441	rrn4.5	4.5S ribosomal RNA	rRNA	.	ElguCp099	chrPltd:109175-109277	103	0	2	0	1	0	4	0	0	1	3	0	1.00362	0	0.46975	0	1.54946	0	0	1.3303	1.0291	0	1.40472	0	0.811224	0	1.9035	0	0	2.5089	1.29585
rna-ElguCp009	12079442	trnG-UCC	tRNA-Gly	tRNA	.	ElguCp009	chrPltd:9500-10256	71	471	668	128	245	323	1120	680	94	118	869	337.908	489.943	399.321	689.776	733.037	795.267	431.708	277.265	375.922	605.191	467.206	685.747	748.363	1191.19	1305.81	976.984	567.394	546.108	708.976	762.066
gene-ElguCp104	12079443	ndhF	NADH dehydrogenase subunit 5	Gene	YP_006073151.1	ElguCp104	chrPltd:112208-114445	2238	4050	5898	1625	3536	3081	20000	6343	2648	2459	17403	92.2497	137.348	161.011	316.219	221.862	450.541	127.763	247.91	249.769	384.721	127.549	192.239	301.749	546.087	395.22	553.489	167.919	488.289	471.055	484.447
gene-ElguCp111	12079444	ndhG	NADH dehydrogenase subunit 6	Gene	YP_006073157.1	ElguCp111	chrPltd:120185-120715	531	7197	10224	762	1580	1716	43435	19505	1070	886	36364	690.936	1003.45	317.993	595.312	520.786	4123.9	1655.96	421.952	378.969	3388.21	955.319	1404.48	595.948	1028.06	927.716	5066.2	2176.43	831.087	714.722	4266.49
gene-ElguCp112	12079445	ndhI	NADH dehydrogenase subunit I	Gene	YP_006073158.1	ElguCp112	chrPltd:121049-121591	543	4356	7914	890	1734	2006	38555	15730	1565	1143	29389	408.958	759.516	363.42	639.085	595.271	3579.65	1305.92	603.729	478.487	2677.73	565.443	1063.05	681.081	1103.66	1060.4	4397.59	1716.37	1189.12	902.411	3371.84
gene-ElguCp113	12079446	ndhA	NADH dehydrogenase subunit 1	Gene	YP_006073159.1	ElguCp113	chrPltd:121680-123811	1092	20668	23158	4074	7082	8504	95780	60549	4419	4041	86140	964.898	1105.25	827.569	1297.95	1255.25	4421.97	2499.72	847.701	841.293	3902.79	1334.11	1546.96	1550.94	2241.48	2236.07	5432.38	3285.38	1669.65	1586.65	4914.45
gene-ElguCp115	12079447	rps15	ribosomal protein S15	Gene	YP_006073161.1	ElguCp115	chrPltd:125101-125373	273	476	639	556	1149	1297	1852	763	658	745	1516	88.8343	121.951	451.286	841.845	765.616	341.98	125.916	504.297	620.27	274.658	122.826	170.689	845.75	1453.81	1363.85	420.122	165.491	993.277	1169.81	345.853
gene-ElguCp116	12079448	ycf1	hypothetical protein RF1	Gene	YP_006073162.1	ElguCp116	chrPltd:125753-131242	5490	6928	8674	7939	18015	16458	15196	5010	9451	10856	13199	64.3307	82.3441	320.782	656.811	483.255	139.543	41.1367	360.697	449.566	118.948	88.9464	115.253	601.173	1134.27	860.859	171.428	54.066	710.438	847.866	149.781
rna-ElguCp117	12079449	trnN-GUU	tRNA-Asn	tRNA	.	ElguCp117	chrPltd:131561-131632	72	64	34	11	12	20	51	49	20	17	30	44.6529	24.3956	31.6191	33.3608	43.8968	35.2149	30.0832	57.1901	52.9199	20.4254	61.7391	34.1452	59.257	57.6117	78.1968	43.2615	39.5384	112.643	99.8051	25.7199
rna-ElguCp118	12079450	trnR-ACG	tRNA-Arg	tRNA	.	ElguCp118	chrPltd:132219-132292	74	26	17	3	5	2	20	13	3	5	19	17.4161	11.3626	8.10063	11.6975	3.94572	13.5965	7.55857	6.27231	13.8567	12.2683	24.0802	15.9037	15.1813	20.2007	7.02881	16.7033	9.93423	12.3541	26.1333	15.4484
rna-ElguCp119	12079451	rrn5	5S ribosomal RNA	rRNA	.	ElguCp119	chrPltd:132544-132664	121	0	3	0	0	0	4	0	1	0	2	0	0.954339	0	0	0	1.32655	0	0.275225	0	0.472191	0	1.33574	0	0	0	1.62966	0	0.542091	0	0.59459
rna-ElguCp120	12079452	rrn4.5	4.5S ribosomal RNA	rRNA	.	ElguCp120	chrPltd:132889-132991	103	0	3	0	1	0	5	0	0	1	3	0	1.0252	0	0.46975	0	2.35417	0	0	1.3303	1.32057	0	1.43491	0	0.811224	0	2.89209	0	0	2.5089	1.66288
rna-ElguCp121	12079453	rrn23	23S ribosomal RNA	rRNA	.	ElguCp121	chrPltd:133096-135900	2805	311	2689	40	95	59	9095	129	46	9	10392	5.63491	49.9515	3.12572	6.75746	3.37173	163.453	2.06602	3.42768	0.666706	183.283	7.79107	69.9145	5.85788	11.6697	6.00632	200.802	2.71538	6.75125	1.25738	230.793
rna-ElguCp122	12079454	trnA-UGC	tRNA-Ala	tRNA	.	ElguCp122	chrPltd:136046-136918	73	4027	3935	259	287	186	4025	1872	253	447	2260	2812.05	2808.7	786.975	786.186	409.227	2779.33	1155.63	725.256	1391.63	1531.62	3888.06	3931.19	1474.86	1357.69	728.987	3414.4	1518.84	1428.48	2624.56	1928.64
rna-ElguCp123	12079455	trnI-GAU	tRNA-Ile	tRNA	.	ElguCp123	chrPltd:136983-137996	77	4922	4241	325	0	283	4763	2614	365	561	2644	3258.37	2869.98	935.599	0	591.46	3118.15	1530.28	992.864	1655.49	1698.38	4505.17	4016.96	1753.4	0	1053.61	3830.64	2011.25	1955.57	3122.2	2138.63
gene-ElguCp011	12079457	atpA	ATP synthase CF1 alpha subunit	Gene	YP_006073089.1	ElguCp011	chrPltd:10576-12120	1545	88967	99779	16011	17534	21076	150725	148995	15174	11830	167068	2935.67	3365.87	2299.09	2271.61	2198.96	4918.38	4347.61	2057.73	1740.77	5350.08	4058.99	4711.03	4308.7	3922.9	3917.18	6042.22	5714.07	4052.95	3283.04	6736.9
gene-ElguCp013	12079458	atpH	ATP synthase CF0 subunit III	Gene	YP_006073091.1	ElguCp013	chrPltd:14087-14332	246	13342	13643	3098	4508	5744	31371	28050	3910	3571	31067	2764.83	2890.26	2793.5	3667.4	3763.61	6429.04	5140.41	3330.13	3300.13	6248.13	3822.78	4045.35	5235.27	6333.34	6704.4	7898.06	6756.04	6559.11	6223.93	7867.74
gene-ElguCp016	12079459	rpoC2	RNA polymerase beta' subunit	Gene	YP_006073094.1	ElguCp016	chrPltd:17088-21203	4116	12925	18746	9074	16194	21368	18050	13369	13953	15421	17428	160.087	237.358	489.04	787.507	836.847	221.08	146.427	710.235	851.827	209.491	221.344	332.217	916.505	1359.97	1490.74	271.596	192.449	1398.9	1606.52	263.795
gene-ElguCp017	12079460	rpoC1	RNA polymerase beta subunit	Gene	YP_006073095.1	ElguCp017	chrPltd:21383-24175	2049	11576	20660	15478	22629	29280	22774	15863	15887	16597	24302	288.016	525.498	1675.83	2210.52	2303.54	560.353	349.001	1624.56	1841.56	586.796	398.224	735.511	3140.65	3817.41	4103.47	688.393	458.693	3199.78	3473.12	738.902
gene-ElguCp018	12079461	rpoB	RNA polymerase beta subunit	Gene	YP_006073096.1	ElguCp018	chrPltd:24202-27408	3207	7794	13297	5657	7846	7983	13079	10655	6026	6877	13532	123.893	216.084	391.284	489.686	401.254	205.604	149.772	393.648	487.541	208.752	171.3	302.441	733.301	845.653	714.784	252.584	196.845	775.339	919.485	262.863
gene-ElguCp027	12079462	psbC	photosystem II CP43 chlorophyll apoprotein	Gene	YP_006073100.1	ElguCp027	chrPltd:34040-35461	1422	289375	445509	2897	4419	3932	448556	262623	2339	2939	399778	10374.5	16328.4	451.932	621.91	445.707	15903.1	8326.1	344.56	469.826	13909.6	14344.3	22854	846.961	1074	793.973	19536.9	10943	678.654	886.075	17515.2
rna-ElguCp030	12079463	trnG-GCC	tRNA-Gly	tRNA	.	ElguCp030	chrPltd:36504-36574	71	40	18	4	1	1	21	6	1	0	9	28.4554	13.145	10.8847	2.65119	2.25545	14.3709	3.53226	2.77519	0	5.79629	39.3437	18.3983	20.399	4.57841	4.01781	17.6546	4.64246	5.46608	0	7.29878
rna-ElguCp031	12079464	trnfM-CAU	tRNA-Met	tRNA	.	ElguCp031	chrPltd:36785-36858	74	22	34	5	10	19	12	8	7	7	22	14.7824	23.6569	12.9451	25.455	40.0631	7.9409	4.32509	17.5512	18.557	14.2044	20.4388	33.1114	24.2603	43.959	71.3675	9.75538	5.68447	34.5693	34.9979	17.8863
gene-ElguCp032	12079465	rps14	ribosomal protein S14	Gene	YP_006073102.1	ElguCp032	chrPltd:37022-37324	303	66203	86885	3628	5676	5244	84571	81425	2191	2573	92597	11138.8	14944.7	2656.02	3749.61	2789.77	14071.6	12115	1514.57	1930.49	15119.8	15401	20917.3	4977.62	6475.31	4969.64	17286.9	15922.8	2983.14	3640.83	19039.1
gene-ElguCp033	12079466	psaB	photosystem I P700 apoprotein A2	Gene	YP_006073103.1	ElguCp033	chrPltd:37468-39672	2205	501621	631719	11807	17854	15241	605211	525928	8023	11080	575286	11597.8	14931.5	1187.89	1620.67	1114.19	13837.7	10752.9	762.355	1142.41	12908.4	16035.6	20898.8	2226.2	2798.77	1984.8	16999.6	14132.6	1501.55	2154.55	16254.4
rna-ElguCp036	12079467	trnS-GGA	tRNA-Ser	tRNA	.	ElguCp036	chrPltd:45182-45268	87	61	48	16	31	35	50	47	26	9	36	35.3611	28.2152	39.8888	70.866	63.6744	28.7673	24.3515	60.496	22.9147	19.9758	48.8918	39.4913	74.7552	122.381	113.428	35.3406	32.0052	119.154	43.2163	25.1538
rna-ElguCp038	12079468	trnT-UGU	tRNA-Thr	tRNA	.	ElguCp038	chrPltd:46509-46581	73	8	14	2	9	9	9	11	1	2	8	5.40196	9.56971	5.73604	24.1149	18.222	5.70795	6.47835	0.969416	3.54773	5.2066	7.46899	13.3942	10.7499	41.6448	32.4602	7.01221	8.5145	1.90939	6.6909	6.55623
rna-ElguCp039	12079469	trnL-UAA	tRNA-Leu	tRNA	.	ElguCp039	chrPltd:47533-48136	85	1467	1705	252	392	565	2057	1944	174	229	1947	879.566	1044.98	655.52	922.91	1070.22	1219.69	1030.76	428.669	611.873	1132.87	1216.13	1462.6	1228.5	1593.8	1906.46	1498.38	1354.72	844.317	1153.97	1426.53
rna-ElguCp044	12079470	trnV-UAC	tRNA-Val	tRNA	.	ElguCp044	chrPltd:52823-53489	76	2452	2553	496	683	1048	2973	3169	382	490	3683	1644.7	1750.27	1446.98	1798.08	2222.28	1971.57	1879.57	1050.79	1465.72	2397.38	2274.03	2449.76	2711.77	3105.16	3958.72	2422.07	2470.32	2069.67	2764.3	3018.81
gene-ElguCp046	12079471	atpE	ATP synthase CF1 epsilon subunit	Gene	YP_006073110.1	ElguCp046	chrPltd:53839-54243	405	12113	13879	3222	4212	4401	24870	22237	2882	3392	21194	1524.65	1786.02	1764.51	2081.32	1751.64	3095.79	2475.29	1490.67	1904.15	2589.08	2108.05	2499.8	3306.84	3594.3	3120.32	3803.17	3253.27	2936.06	3591.17	3260.22
gene-ElguCp047	12079472	atpB	ATP synthase CF1 beta subunit	Gene	YP_006073111.1	ElguCp047	chrPltd:54240-55736	1497	51114	67134	13610	17873	20925	103836	101289	13039	13930	91730	1740.68	2337.26	2016.92	2389.74	2253.24	3496.97	3050.33	1824.99	2115.55	3031.69	2406.74	3271.34	3779.89	4126.91	4013.88	4296.02	4009.06	3594.55	3989.85	3817.55
gene-ElguCp048	12079473	rbcL	ribulose bisophosphate carboxylase	Gene	YP_006073112.1	ElguCp048	chrPltd:56511-57965	1455	869907	1137398	66780	106103	105398	1613726	1574020	62703	85027	1777525	30480.2	40741.5	10182.4	14596.6	11677.4	55915.5	48770.4	9029.39	13286.6	60443.4	42143.3	57023.7	19082.6	25207.2	20801.9	68692.1	64099	17784.5	25058	76111.2
gene-ElguCp052	12079474	cemA	envelope membrane protein	Gene	YP_006073116.1	ElguCp052	chrPltd:62033-62728	696	8386	12675	1058	2125	2009	35511	14782	1281	1824	24257	614.241	949.113	337.227	611.078	465.221	2572.23	957.486	385.436	595.613	1724.29	849.276	1328.42	631.993	1055.29	828.734	3159.98	1258.42	759.165	1123.31	2171.25
gene-ElguCp053	12079475	petA	cytochrome f	Gene	YP_006073117.1	ElguCp053	chrPltd:62957-63919	963	29187	33167	3719	6093	6262	44664	36928	4247	4902	39276	1545.13	1794.98	856.622	1266.3	1048.11	2338.27	1728.77	924.009	1157.35	2017.87	2136.37	2512.33	1605.39	2186.81	1867.07	2872.56	2272.13	1819.95	2182.73	2540.94
gene-ElguCp067	12079476	psbB	photosystem II CP47 chlorophyll apoprotein	Gene	YP_006073130.1	ElguCp067	chrPltd:73416-74942	1527	233741	276848	8081	11886	10534	408166	387609	8140	8087	408769	7803.75	9449.07	1174.05	1558.05	1112.06	13476.1	11443.6	1116.81	1204.09	13244.4	10789.8	13225.4	2200.27	2690.64	1981	16555.3	15040.4	2199.7	2270.88	16677.6
gene-ElguCp068	12079477	psbT	photosystem II protein T	Gene	YP_006073131.1	ElguCp068	chrPltd:75135-75248	114	3465	6392	219	442	312	17113	5886	240	239	13171	1549.53	2921.82	424.621	774.38	439.834	7567.87	2327.47	439.709	475.214	5716.1	2142.45	4089.51	795.778	1337.3	783.51	9297.11	3059	866.063	896.238	7197.8
gene-ElguCp091	12079478	rps7	ribosomal protein S7	Gene	YP_006073150.1	ElguCp091	chrPltd:98869-99336	468	7969	10997	6109	9459	9743	12860	10569	5814	5336	12999	867.986	1224.62	2895.77	4045.24	3356	1385.35	1018.11	2602.9	2592.09	1374.22	1200.11	1714.04	5426.94	6985.84	5978.29	1701.9	1338.1	5126.74	4888.58	1730.44
rna-ElguCp095	12079479	trnI-GAU	tRNA-Ile	tRNA	.	ElguCp095	chrPltd:104170-105183	77	4673	4068	324	0	281	4644	2551	364	554	2574	3093.94	2753.14	932.039	0	587.273	3040.02	1493.37	988.62	1634.8	1653.39	4277.82	3853.43	1746.72	0	1046.15	3734.66	1962.74	1947.21	3083.18	2081.97
rna-ElguCp098	12079480	rrn23	23S ribosomal RNA	rRNA	.	ElguCp098	chrPltd:106266-109070	2805	310	2601	40	94	59	8820	135	48	9	10206	5.61916	48.3268	3.12362	6.63955	3.37173	158.509	2.15559	3.53429	0.666706	180.014	7.76929	67.6404	5.85395	11.466	6.00632	194.728	2.8331	6.96122	1.25738	226.676
rna-ElguCp100	12079481	rrn5	5S ribosomal RNA	rRNA	.	ElguCp100	chrPltd:109502-109622	121	0	3	0	0	0	4	0	1	0	2	0	0.932767	0	0	0	1.33552	0	0.275225	0	0.457636	0	1.30554	0	0	0	1.64068	0	0.542091	0	0.576262
rna-ElguCp101	12079482	trnR-ACG	tRNA-Arg	tRNA	.	ElguCp101	chrPltd:109874-109947	74	24	16	3	5	2	21	13	3	5	18	16.491	11.1452	8.10063	11.375	3.94572	14.2756	7.60522	8.3537	13.2463	11.8067	22.8012	15.5993	15.1813	19.6439	7.02881	17.5375	9.99554	16.4537	24.9821	14.8672
rna-ElguCp102	12079483	trnN-GUU	tRNA-Asn	tRNA	.	ElguCp102	chrPltd:110534-110605	72	60	32	11	13	20	48	47	18	17	30	42.1269	23.0065	32.4353	33.3979	42.9108	33.137	29.0337	52.3144	52.1678	20.3351	58.2465	32.2009	60.7867	57.6759	76.4403	40.7088	38.1591	103.04	98.3866	25.6062
gene-ElguCp105	12079485	rpl32	ribosomal protein L32	Gene	YP_006073152.1	ElguCp105	chrPltd:114752-114925	174	2480	2796	808	2417	1391	16114	2251	781	802	12994	726.436	837.19	1029.86	2780.4	1288.13	4668.87	582.973	939.681	1047.78	3694.55	1004.4	1171.77	1930.04	4801.56	2294.64	5735.7	766.202	1850.82	1976.09	4652.23
rna-ElguCp106	12079486	trnL-UAG	tRNA-Leu	tRNA	.	ElguCp106	chrPltd:115716-115795	80	18	5	3	8	11	13	12	1	3	10	11.1822	3.2056	5.87693	18.2104	21.0046	7.70425	6.6355	1.38759	6.77576	5.67665	15.4609	4.48671	11.0139	31.448	37.4172	9.46466	8.72105	2.73304	12.7788	7.14813
gene-ElguCp107	12079487	ccsA	cytochrome c heme attachment protein	Gene	YP_006073153.1	ElguCp107	chrPltd:115879-116853	975	3211	3555	2374	4545	4140	5927	4477	1261	1229	5491	167.87	190.015	540.019	933.001	684.485	306.43	206.966	270.887	286.542	278.631	232.105	265.954	1012.04	1611.23	1219.33	376.448	272.016	533.546	540.408	350.857
gene-ElguCp108	12079488	ndhD	NADH dehydrogenase subunit 4	Gene	YP_006073154.1	ElguCp108	chrPltd:117069-118574	1506	81151	102036	3422	6821	6653	239345	127631	4276	3744	207298	2747.09	3531.15	504.085	906.495	712.108	8012.41	3820.67	594.876	565.151	6810.27	3798.24	4942.36	944.701	1565.45	1268.53	9843.23	5021.51	1171.68	1065.86	8575.6
gene-ElguCp109	12079489	psaC	photosystem I subunit VII	Gene	YP_006073155.1	ElguCp109	chrPltd:118693-118938	246	54912	51897	5201	8515	8530	132206	103338	4549	3728	125118	11379.9	10995	4690.39	6928.21	5589.72	27094.3	18937.9	3874.46	3445.55	25163.9	15734.3	15389.1	8790.21	11964.5	9957.39	33285.3	24890.1	7631.23	6498.19	31686.8
gene-ElguCp110	12079490	ndhE	NADH dehydrogenase subunit 4L	Gene	YP_006073156.1	ElguCp110	chrPltd:119660-119965	306	2368	3568	251	756	895	18492	5550	315	320	11052	394.506	607.574	181.897	494.373	471.197	3046.54	817.583	215.123	237.732	1786.93	545.462	850.389	340.891	853.747	839.38	3742.66	1074.55	423.711	448.355	2250.13
gene-ElguCp114	12079491	ndhH	NADH dehydrogenase subunit 7	Gene	YP_006073160.1	ElguCp114	chrPltd:123813-124994	1182	6551	8327	4311	6600	8645	20864	20576	5063	5273	20720	282.511	367.128	809.111	1117.6	1179.02	889.879	784.765	897.352	1014.13	867.264	390.612	513.85	1516.35	1930.02	2100.28	1093.21	1031.42	1767.45	1912.61	1092.07
rna-ElguCp125	12079492	rrn16	16S ribosomal RNA	rRNA	.	ElguCp125	chrPltd:138313-139803	1491	158	1004	36	90	34	4010	43	33	4	3346	5.37626	35.0726	5.31624	12.0268	3.62412	135.558	1.27234	4.59321	0.457978	111.006	7.43345	49.0892	9.9631	20.7695	6.45592	166.533	1.67223	9.0469	0.863731	139.781
rna-ElguCp126	12079493	trnV-GAC	tRNA-Val	tRNA	.	ElguCp126	chrPltd:140036-140107	72	164	172	46	61	58	178	59	35	36	120	116.039	124.441	140.74	169.124	128.873	124.597	36.6623	101.747	111.424	82.3253	160.44	174.173	263.76	292.065	229.572	153.067	48.1853	200.404	210.142	103.665
gene-ElguCp128	12079494	rps7	ribosomal protein S7	Gene	YP_006073163.1	ElguCp128	chrPltd:142830-143297	468	7434	10657	6224	9503	9722	12255	10428	6026	5363	12150	809.782	1186.71	2950.3	4064.29	3348.58	1320.17	1004.45	2697.47	2604.99	1284.46	1119.64	1660.98	5529.12	7018.74	5965.08	1621.83	1320.15	5313.01	4912.92	1617.41
rna-ElguCp008	12079495	trnS-GCU	tRNA-Ser	tRNA	.	ElguCp008	chrPltd:8288-8375	88	71	66	13	25	29	52	65	7	12	46	40.7602	38.6571	31.6887	56.5788	52.2872	29.6241	33.0045	15.437	30.0974	25.4976	56.3569	54.1063	59.3874	97.7075	93.1432	36.3932	43.3778	30.4051	56.7626	32.107
gene-ElguCp129	12079496	ndhB	NADH dehydrogenase subunit 2	Gene	YP_006073164.1	ElguCp129	chrPltd:143609-145844	1533	12569	18771	2633	3602	3599	27149	19235	3247	2653	22860	417.981	638.134	380.925	470.197	378.455	892.823	565.662	443.729	393.463	737.758	577.919	893.163	713.887	811.996	674.171	1096.83	743.45	873.98	742.058	928.996
gene-ElguCp092	12079497	rps12	ribosomal protein S12	Gene	YP_006073083.1	ElguCp092	chrPltd:70622-100190	399	3866	5543	2956	4682	5059	7557	6501	3210	2980	7030	493.861	723.951	1643.17	2348.4	2043.88	954.782	734.434	1685.27	1697.82	871.602	682.834	1013.27	3079.44	4055.53	3640.93	1172.95	965.267	3319.35	3202.03	1097.54
rna-ElguCp130	12079498	trnL-CAA	tRNA-Leu	tRNA	.	ElguCp130	chrPltd:146408-146488	81	43	52	5	5	7	40	44	8	10	35	26.6534	32.9727	11.8264	10.1138	13.6215	24.3464	24.1373	19.1694	27.0008	21.2228	36.8522	46.1502	22.1638	17.4658	24.2651	29.9094	31.7237	37.7565	50.9226	26.7241
gene-ElguCp001	12079499	psbA	photosystem II protein D1	Gene	YP_006073084.1	ElguCp001	chrPltd:124-1185	1062	8695514	7507778	35992	50006	63156	5953647	9049722	33153	28698	6547504	417426	368447	7518.6	9425.05	9586.61	282634	384167	6540.8	6143.88	305033	577151	515695	14090.5	16276.4	17077.4	347215	504911	12882.9	11587.1	384102
rna-ElguCp002	12079501	trnK-UUU	tRNA-Lys	tRNA	.	ElguCp002	chrPltd:1404-4111	72	685	831	288	473	657	1307	973	392	416	1102	484.376	601.332	885.886	1314.68	1468.87	914.976	608.798	1139.39	1312.72	757.251	669.719	841.653	1660.23	2270.35	2616.61	1124.05	800.143	2244.17	2475.74	953.542
gene-ElguCp132	12079502	ycf2	hypothetical protein RF2	Gene	YP_006073165.1	ElguCp132	chrPltd:147368-154237	6870	5427	7879	6541	10087	11321	5795	4417	6221	7077	5678	40.2688	59.7654	211.225	293.895	265.639	42.5228	28.9798	189.727	234.189	40.8904	55.6773	83.6504	395.854	507.535	473.202	52.2392	38.0882	373.691	441.672	51.4898
gene-ElguCp003	12079503	matK	maturase K	Gene	YP_006073085.1	ElguCp003	chrPltd:1711-3252	1542	20754	45086	30196	55627	74561	127216	45457	50237	58979	109130	686.154	1523.85	4344.32	7220.75	7794.72	4159.32	1328.98	6826.11	8696.26	3501.49	948.707	2132.85	8141.64	12469.7	13885.3	5109.72	1746.67	13444.9	16400.8	4409.13
rna-ElguCp133	12079504	trnM-CAU	tRNA-Met	tRNA	.	ElguCp133	chrPltd:154306-154379	74	33	39	33	42	63	32	46	23	31	36	22.3521	27.126	98.5577	112.926	136.052	21.5419	27.4814	62.7606	92.2561	23.9754	30.905	37.9668	184.706	195.016	242.359	26.4642	36.1189	123.615	173.992	30.1902
gene-ElguCp134	12079505	rpl23	ribosomal protein L23	Gene	YP_006073166.1	ElguCp134	chrPltd:154540-154821	282	2108	2673	1334	1840	2016	3672	3995	1774	1925	3860	380.984	493.926	1049.48	1305.82	1151.88	656.369	638.522	1317.41	1551.94	677.143	526.765	691.322	1966.81	2255.05	2051.93	806.348	839.21	2594.81	2926.9	852.669
gene-ElguCp004	12079506	rps16	ribosomal protein S16	Gene	YP_006073086.1	ElguCp004	chrPltd:4840-5956	261	2738	3197	4882	9156	10058	10239	4010	4051	4730	8028	534.649	638.318	4148.94	7021.8	6211.93	1977.67	692.568	3251.91	4119.59	1521.81	739.229	893.419	7775.49	12126.2	11065.8	2429.56	910.243	6405.04	7769.41	1916.29
gene-ElguCp135	12079507	rpl2	ribosomal protein L2	Gene	YP_006073167.1	ElguCp135	chrPltd:154840-156323	822	4655	6377	7044	9097	9762	11042	15427	10913	12154	11495	288.653	404.327	1900.96	2215.17	1914.44	677.21	846.043	2781.5	3361.58	691.864	399.104	565.914	3562.56	3825.44	3410.34	831.951	1111.96	5478.52	6339.83	871.206
rna-ElguCp005	12079508	trnQ-UUG	tRNA-Gln	tRNA	.	ElguCp005	chrPltd:7079-7150	72	0	0	2	2	5	28	0	1	2	0	0	0	3.53024	5.30238	9.43029	19.2908	0	0.847975	4.078	0	0	0	6.61598	9.15683	16.7989	23.6987	0	1.67019	7.69097	0
gene-ElguCp073	12079509	rpoA	RNA polymerase alpha subunit	Gene	YP_006073136.1	ElguCp073	chrPltd:78991-80016	1026	5972	9362	5300	9183	10980	17318	11296	8454	8089	16410	296.723	475.562	1145.86	1791.41	1725.06	850.96	496.311	1726.35	1792.47	791.322	410.263	665.619	2147.44	3093.65	3072.99	1045.4	652.302	3400.26	3380.54	996.445
rna-ElguCp136	12079510	trnH-GUG	tRNA-His	tRNA	.	ElguCp136	chrPltd:156370-156443	74	151	155	239	347	334	314	384	389	404	187	103.579	108.795	716.32	937.455	727.066	213.806	233.575	1100.88	1238.3	124.388	143.213	152.275	1342.45	1618.92	1295.18	262.661	306.988	2168.32	2335.38	156.631
gene-ElguCp137	12079511	rps19	ribosomal protein S19	Gene	YP_006073168.1	ElguCp137	chrPltd:156577-156855	279	717	1004	1777	2790	2781	3125	2588	2756	2332	3040	130.954	187.436	1412.3	2001.52	1606.49	564.552	418.159	2069.66	1900.39	539.028	181.062	262.345	2646.77	3456.49	2861.76	693.551	549.586	4076.46	3584.07	678.752
gene-ElguCp006	12079512	psbK	photosystem II protein K	Gene	YP_006073087.1	ElguCp006	chrPltd:7451-7636	186	2433	2587	115	436	306	43888	4729	303	243	26751	666.59	724.687	136.52	468.32	264.68	11895.9	1146.06	340.282	296.603	7115.72	921.657	1014.31	255.851	808.755	471.494	14614.1	1506.27	670.227	559.384	8960.22
gene-ElguCp007	12079513	psbI	photosystem II protein I	Gene	YP_006073088.1	ElguCp007	chrPltd:8038-8148	111	502	566	46	122	127	5728	1418	68	88	2861	230.484	265.475	91.8601	219.213	183.393	2601.53	575.646	127.809	179.385	1274.83	318.677	371.571	172.154	378.565	326.692	3195.98	756.572	251.735	338.313	1605.28
XM_019847213	105031928	LOC105031928	regulator of telomere elongation helicase 1 homolog, transcript variant X2	mRNA	XP_019702772.1	.	chr1:2430414-2454667	4249	64	82	97	133	262	63	84	217	217	86	0.765828	1.005	5.03425	6.25569	9.93856	0.737613	0.886687	10.6991	11.597	0.99045	1.05887	1.40664	9.43464	10.8031	17.7043	0.906157	1.16537	21.0732	21.8715	1.24719
XM_019847185	105031928	LOC105031928	regulator of telomere elongation helicase 1 homolog, transcript variant X1	mRNA	XP_019702744.1	.	chr1:2430414-2454668	4253	0	0	0	0	0	0	0	0	0	0	0	0	0	0	0	0	0	0	0	0	0	0	0	0	0	0	0	0	0	0
XM_019847239	105031928	LOC105031928	regulator of telomere elongation helicase 1 homolog, transcript variant X3	mRNA	XP_019702798.1	.	chr1:2431692-2454671	3799	0	0	0	13	3	0	0	0	0	0	0	0	0	0.634817	0.113039	0	0	0	0	0	0	0	0	1.09628	0.201364	0	0	0	0	0
XM_010906233	105031929	LOC105031929	pathogenesis-related protein 1B-like	mRNA	XP_010904535.1	.	chr1:56445868-56446344	477	0	0	0	0	0	0	0	0	0	0	0	0	0	0	0	0	0	0	0	0	0	0	0	0	0	0	0	0	0	0
XM_010906230	105031930	LOC105031930	leucine-rich repeat receptor-like serine/threonine/tyrosine-protein kinase SOBIR1	mRNA	XP_010904532.1	.	NW_011550936.1:403206-404634	1340	0	0	0	0	0	0	0	0	0	0	0	0	0	0	0	0	0	0	0	0	0	0	0	0	0	0	0	0	0	0
XM_010906231	105031931	LOC105031931	leucine-rich repeat receptor-like serine/threonine/tyrosine-protein kinase SOBIR1	mRNA	XP_010904533.1	.	NW_011550936.1:487250-489441	2192	0	0	0	0	0	0	0	0	0	0	0	0	0	0	0	0	0	0	0	0	0	0	0	0	0	0	0	0	0	0
XM_010906232	105031933	LOC105031933	leucine-rich repeat receptor-like serine/threonine/tyrosine-protein kinase SOBIR1	mRNA	XP_010904534.1	.	NW_011550936.1:623170-625487	2318	0	0	0	0	0	0	0	0	0	0	0	0	0	0	0	0	0	0	0	0	0	0	0	0	0	0	0	0	0	0
XM_010906234	105031934	LOC105031934	leucine-rich repeat receptor-like serine/threonine/tyrosine-protein kinase SOBIR1	mRNA	XP_010904536.1	.	NW_011550936.1:668157-669514	1358	0	0	0	0	0	0	0	0	0	0	0	0	0	0	0	0	0	0	0	0	0	0	0	0	0	0	0	0	0	0
XM_010906235	105031935	LOC105031935	leucine-rich repeat receptor-like serine/threonine/tyrosine-protein kinase SOBIR1	mRNA	XP_010904537.1	.	NW_011550936.1:691526-692968	1443	0	0	0	0	0	0	0	0	0	0	0	0	0	0	0	0	0	0	0	0	0	0	0	0	0	0	0	0	0	0
XM_010906236	105031936	LOC105031936	protein SIEVE ELEMENT OCCLUSION B	mRNA	XP_010904538.1	.	NW_011550936.1:781714-786803	2443	0	0	0	0	0	0	0	0	0	0	0	0	0	0	0	0	0	0	0	0	0	0	0	0	0	0	0	0	0	0
XM_029260854	105031937	LOC105031937	protein SIEVE ELEMENT OCCLUSION C	mRNA	XP_029116687.1	.	NW_011550936.1:790217-811177	2415	0	0	0	0	0	0	0	0	0	0	0	0	0	0	0	0	0	0	0	0	0	0	0	0	0	0	0	0	0	0
XM_029260856	105031938	LOC105031938	protein-L-isoaspartate O-methyltransferase, transcript variant X2	mRNA	XP_029116689.1	.	NW_011550936.1:875308-893282	1078	0	0	0	0	0	0	0	0	0	0	0	0	0	0	0	0	0	0	0	0	0	0	0	0	0	0	0	0	0	0
XM_010906238	105031938	LOC105031938	protein-L-isoaspartate O-methyltransferase, transcript variant X1	mRNA	XP_010904540.1	.	NW_011550936.1:875310-893282	1241	0	0	0	0	0	0	0	0	0	0	0	0	0	0	0	0	0	0	0	0	0	0	0	0	0	0	0	0	0	0
XM_010906239	105031939	LOC105031939	uncharacterized LOC105031939	mRNA	XP_010904541.1	.	NW_011550936.1:958630-967100	1128	0	0	0	0	0	0	0	0	0	0	0	0	0	0	0	0	0	0	0	0	0	0	0	0	0	0	0	0	0	0
XM_029260857	105031940	LOC105031940	DNA-(apurinic or apyrimidinic site) lyase, chloroplastic	mRNA	XP_029116690.1	.	NW_011550936.1:1008023-1035532	2395	0	0	0	0	0	0	0	0	0	0	0	0	0	0	0	0	0	0	0	0	0	0	0	0	0	0	0	0	0	0
XM_010906244	105031941	LOC105031941	pathogenesis-related protein PRB1-3-like	mRNA	XP_010904546.1	.	chr1:56393572-56394063	492	0	0	0	0	0	0	0	0	0	0	0	0	0	0	0	0	0	0	0	0	0	0	0	0	0	0	0	0	0	0
XM_010906241	105031942	LOC105031942	glycosyl hydrolase 5 family protein	mRNA	XP_010904543.1	.	NW_011550936.1:1045755-1049007	1809	0	0	0	0	0	0	0	0	0	0	0	0	0	0	0	0	0	0	0	0	0	0	0	0	0	0	0	0	0	0
XM_010906242	105031943	LOC105031943	glycosyl hydrolase 5 family protein	mRNA	XP_010904544.1	.	NW_011550936.1:1077573-1082006	2014	0	0	0	0	0	0	0	0	0	0	0	0	0	0	0	0	0	0	0	0	0	0	0	0	0	0	0	0	0	0
XM_010906243	105031944	LOC105031944	protein GLE1	mRNA	XP_010904545.2	.	NW_011550936.1:1133398-1157310	1210	0	0	0	0	0	0	0	0	0	0	0	0	0	0	0	0	0	0	0	0	0	0	0	0	0	0	0	0	0	0
XM_029260858	105031945	LOC105031945	E3 ubiquitin-protein ligase RGLG1, transcript variant X2	mRNA	XP_029116691.1	.	NW_011550936.1:1302345-1314740	1821	0	0	0	0	0	0	0	0	0	0	0	0	0	0	0	0	0	0	0	0	0	0	0	0	0	0	0	0	0	0
XM_010906245	105031945	LOC105031945	E3 ubiquitin-protein ligase RGLG1, transcript variant X1	mRNA	XP_010904547.1	.	NW_011550936.1:1302345-1315819	1941	0	0	0	0	0	0	0	0	0	0	0	0	0	0	0	0	0	0	0	0	0	0	0	0	0	0	0	0	0	0
XM_010906246	105031946	LOC105031946	early endosome antigen 1	mRNA	XP_010904548.1	.	NW_011550936.1:1323763-1334228	2177	0	0	0	0	0	0	0	0	0	0	0	0	0	0	0	0	0	0	0	0	0	0	0	0	0	0	0	0	0	0
XM_010906247	105031947	LOC105031947	leucine-rich repeat receptor-like serine/threonine/tyrosine-protein kinase SOBIR1	mRNA	XP_010904549.1	.	NW_011550936.1:257791-259174	1384	0	0	0	0	0	0	0	0	0	0	0	0	0	0	0	0	0	0	0	0	0	0	0	0	0	0	0	0	0	0
XM_010906248	105031948	LOC105031948	leucine-rich repeat receptor-like serine/threonine/tyrosine-protein kinase SOBIR1	mRNA	XP_010904550.1	.	NW_011550936.1:553546-554882	1337	0	0	0	0	0	0	0	0	0	0	0	0	0	0	0	0	0	0	0	0	0	0	0	0	0	0	0	0	0	0
XM_029260855	105031949	LOC105031949	NAC domain-containing protein 60-like	mRNA	XP_029116688.1	.	NW_011550936.1:980214-991316	1583	0	0	0	0	0	0	0	0	0	0	0	0	0	0	0	0	0	0	0	0	0	0	0	0	0	0	0	0	0	0
XM_010906251	105031951	LOC105031951	aldehyde oxidase GLOX-like	mRNA	XP_010904553.1	.	NW_011550936.1:1175570-1177189	1620	0	0	0	0	0	0	0	0	0	0	0	0	0	0	0	0	0	0	0	0	0	0	0	0	0	0	0	0	0	0
XM_010906255	105031952	LOC105031952	pathogenesis-related protein 1-like	mRNA	XP_010904557.1	.	chr1:56342457-56343150	694	0	0	0	0	0	0	0	0	0	0	0	0	0	0	0	0	0	0	0	0	0	0	0	0	0	0	0	0	0	0
XM_010906252	105031953	LOC105031953	SKP1-like protein 21	mRNA	XP_010904554.1	.	NW_011550937.1:413043-447295	2013	0	0	0	0	0	0	0	0	0	0	0	0	0	0	0	0	0	0	0	0	0	0	0	0	0	0	0	0	0	0
XM_010906253	105031954	LOC105031954	protein PAIR1, transcript variant X1	mRNA	XP_010904555.1	.	NW_011550937.1:479730-492285	1577	0	0	0	0	0	0	0	0	0	0	0	0	0	0	0	0	0	0	0	0	0	0	0	0	0	0	0	0	0	0
XM_019846125	105031954	LOC105031954	protein PAIR1, transcript variant X2	mRNA	XP_019701684.1	.	NW_011550937.1:479730-492285	1574	0	0	0	0	0	0	0	0	0	0	0	0	0	0	0	0	0	0	0	0	0	0	0	0	0	0	0	0	0	0
XM_029260859	105031954	LOC105031954	protein PAIR1, transcript variant X3	mRNA	XP_029116692.1	.	NW_011550937.1:479730-492285	1574	0	0	0	0	0	0	0	0	0	0	0	0	0	0	0	0	0	0	0	0	0	0	0	0	0	0	0	0	0	0
XM_010906256	105031955	LOC105031955	protein indeterminate-domain 5, chloroplastic, transcript variant X1	mRNA	XP_010904558.1	.	NW_011550937.1:1006179-1011500	2750	0	0	0	0	0	0	0	0	0	0	0	0	0	0	0	0	0	0	0	0	0	0	0	0	0	0	0	0	0	0
XM_010906258	105031955	LOC105031955	protein indeterminate-domain 5, chloroplastic, transcript variant X3	mRNA	XP_010904560.1	.	NW_011550937.1:1006179-1011500	2574	0	0	0	0	0	0	0	0	0	0	0	0	0	0	0	0	0	0	0	0	0	0	0	0	0	0	0	0	0	0
XM_029260861	105031955	LOC105031955	protein indeterminate-domain 5, chloroplastic, transcript variant X4	mRNA	XP_029116694.1	.	NW_011550937.1:1006179-1011520	2620	0	0	0	0	0	0	0	0	0	0	0	0	0	0	0	0	0	0	0	0	0	0	0	0	0	0	0	0	0	0
XM_010906254	105031955	LOC105031955	protein indeterminate-domain 5, chloroplastic, transcript variant X2	mRNA	XP_010904556.1	.	NW_011550937.1:1006179-1011534	2516	0	0	0	0	0	0	0	0	0	0	0	0	0	0	0	0	0	0	0	0	0	0	0	0	0	0	0	0	0	0
XM_010906259	105031956	LOC105031956	protein CHROMATIN REMODELING 19, transcript variant X1	mRNA	XP_010904561.2	.	NW_011550937.1:1486759-1525969	2942	0	0	0	0	0	0	0	0	0	0	0	0	0	0	0	0	0	0	0	0	0	0	0	0	0	0	0	0	0	0
XM_019846130	105031956	LOC105031956	protein CHROMATIN REMODELING 19, transcript variant X2	mRNA	XP_019701689.1	.	NW_011550937.1:1486759-1525971	2911	0	0	0	0	0	0	0	0	0	0	0	0	0	0	0	0	0	0	0	0	0	0	0	0	0	0	0	0	0	0
XM_010906260	105031957	LOC105031957	transcription factor bHLH111	mRNA	XP_010904562.1	.	NW_011550937.1:1713518-1717035	1941	0	0	0	0	0	0	0	0	0	0	0	0	0	0	0	0	0	0	0	0	0	0	0	0	0	0	0	0	0	0
XM_010906261	105031958	LOC105031958	ras-related protein RHN1, transcript variant X1	mRNA	XP_010904563.1	.	NW_011550937.1:1808782-1817601	1052	0	0	0	0	0	0	0	0	0	0	0	0	0	0	0	0	0	0	0	0	0	0	0	0	0	0	0	0	0	0
XM_010906262	105031958	LOC105031958	ras-related protein RHN1, transcript variant X2	mRNA	XP_010904564.1	.	NW_011550937.1:1808782-1817601	1040	0	0	0	0	0	0	0	0	0	0	0	0	0	0	0	0	0	0	0	0	0	0	0	0	0	0	0	0	0	0
XM_029260860	105031959	LOC105031959	short-chain dehydrogenase TIC 32, chloroplastic	mRNA	XP_029116693.1	.	NW_011550937.1:197867-267953	792	0	0	0	0	0	0	0	0	0	0	0	0	0	0	0	0	0	0	0	0	0	0	0	0	0	0	0	0	0	0
XM_010906264	105031960	LOC105031960	UDP-N-acetylmuramoyl-L-alanyl-D-glutamate--2,6-diaminopimelate ligase MurE homolog, chloroplastic-like	mRNA	XP_010904566.1	.	NW_011550937.1:518431-528002	2004	0	0	0	0	0	0	0	0	0	0	0	0	0	0	0	0	0	0	0	0	0	0	0	0	0	0	0	0	0	0
gene-LOC105031961	105031961	LOC105031961	.	Gene	.	.	NW_011550937.1:1797764-1801103	677	0	0	0	0	0	0	0	0	0	0	0	0	0	0	0	0	0	0	0	0	0	0	0	0	0	0	0	0	0	0
XM_010906265	105031962	LOC105031962	LOB domain-containing protein CRL1-like	mRNA	XP_010904567.1	.	NW_011550938.1:6880-7976	930	0	0	0	0	0	0	0	0	0	0	0	0	0	0	0	0	0	0	0	0	0	0	0	0	0	0	0	0	0	0
XM_019846133	105031963	LOC105031963	uncharacterized protein At4g14450, chloroplastic-like	mRNA	XP_019701692.1	.	NW_011550938.1:156605-157508	904	0	0	0	0	0	0	0	0	0	0	0	0	0	0	0	0	0	0	0	0	0	0	0	0	0	0	0	0	0	0
XM_010906267	105031964	LOC105031964	signal recognition particle receptor subunit beta, transcript variant X1	mRNA	XP_010904569.1	.	NW_011550938.1:164005-175923	1541	0	0	0	0	0	0	0	0	0	0	0	0	0	0	0	0	0	0	0	0	0	0	0	0	0	0	0	0	0	0
XM_010906268	105031964	LOC105031964	signal recognition particle receptor subunit beta, transcript variant X2	mRNA	XP_010904570.1	.	NW_011550938.1:164005-175923	1443	0	0	0	0	0	0	0	0	0	0	0	0	0	0	0	0	0	0	0	0	0	0	0	0	0	0	0	0	0	0
XM_010906269	105031965	LOC105031965	actin-related protein 9, transcript variant X1	mRNA	XP_010904571.1	.	NW_011550938.1:227345-291169	2058	0	0	0	0	0	0	0	0	0	0	0	0	0	0	0	0	0	0	0	0	0	0	0	0	0	0	0	0	0	0
XM_010906270	105031965	LOC105031965	actin-related protein 9, transcript variant X2	mRNA	XP_010904572.1	.	NW_011550938.1:227345-291169	2055	0	0	0	0	0	0	0	0	0	0	0	0	0	0	0	0	0	0	0	0	0	0	0	0	0	0	0	0	0	0
XM_010906273	105031966	LOC105031966	uncharacterized LOC105031966	mRNA	XP_010904575.1	.	NW_011550938.1:443528-451047	1079	0	0	0	0	0	0	0	0	0	0	0	0	0	0	0	0	0	0	0	0	0	0	0	0	0	0	0	0	0	0
XM_010906276	105031967	LOC105031967	putative F-box protein At1g23770	mRNA	XP_010904578.2	.	chr1:55957033-55959381	1275	0	0	0	0	0	0	0	0	0	0	0	0	0	0	0	0	0	0	0	0	0	0	0	0	0	0	0	0	0	0
XM_010906274	105031968	LOC105031968	1-aminocyclopropane-1-carboxylate oxidase homolog 1	mRNA	XP_010904576.1	.	NW_011550938.1:632368-639166	1321	0	0	0	0	0	0	0	0	0	0	0	0	0	0	0	0	0	0	0	0	0	0	0	0	0	0	0	0	0	0
gene-LOC105031969	105031969	LOC105031969	.	Gene	.	.	NW_011550938.1:632433-659172	1215	0	0	0	0	0	0	0	0	0	0	0	0	0	0	0	0	0	0	0	0	0	0	0	0	0	0	0	0	0	0
XM_010906275	105031970	LOC105031970	1-aminocyclopropane-1-carboxylate oxidase homolog 1	mRNA	XP_010904577.1	.	NW_011550938.1:927535-941775	1312	0	0	0	0	0	0	0	0	0	0	0	0	0	0	0	0	0	0	0	0	0	0	0	0	0	0	0	0	0	0
XM_019846131	105031971	LOC105031971	electron transfer flavoprotein subunit beta, mitochondrial, transcript variant X4	mRNA	XP_019701690.1	.	NW_011550938.1:966817-976204	1383	0	0	0	0	0	0	0	0	0	0	0	0	0	0	0	0	0	0	0	0	0	0	0	0	0	0	0	0	0	0
XM_029260863	105031971	LOC105031971	electron transfer flavoprotein subunit beta, mitochondrial, transcript variant X3	mRNA	XP_029116696.1	.	NW_011550938.1:966817-976204	1699	0	0	0	0	0	0	0	0	0	0	0	0	0	0	0	0	0	0	0	0	0	0	0	0	0	0	0	0	0	0
XR_829706	105031971	LOC105031971	electron transfer flavoprotein subunit beta, mitochondrial, transcript variant X2	misc_RNA	.	.	NW_011550938.1:966817-976204	1616	0	0	0	0	0	0	0	0	0	0	0	0	0	0	0	0	0	0	0	0	0	0	0	0	0	0	0	0	0	0
XM_010906277	105031971	LOC105031971	electron transfer flavoprotein subunit beta, mitochondrial, transcript variant X1	mRNA	XP_010904579.1	.	NW_011550938.1:968040-976204	1249	0	0	0	0	0	0	0	0	0	0	0	0	0	0	0	0	0	0	0	0	0	0	0	0	0	0	0	0	0	0
XM_010906278	105031972	LOC105031972	protein KINESIN LIGHT CHAIN-RELATED 2, transcript variant X1	mRNA	XP_010904580.1	.	NW_011550938.1:1119498-1141704	2684	0	0	0	0	0	0	0	0	0	0	0	0	0	0	0	0	0	0	0	0	0	0	0	0	0	0	0	0	0	0
XM_010906279	105031972	LOC105031972	protein KINESIN LIGHT CHAIN-RELATED 2, transcript variant X3	mRNA	XP_010904581.1	.	NW_011550938.1:1119498-1141704	2390	0	0	0	0	0	0	0	0	0	0	0	0	0	0	0	0	0	0	0	0	0	0	0	0	0	0	0	0	0	0
XR_829707	105031972	LOC105031972	protein KINESIN LIGHT CHAIN-RELATED 2, transcript variant X2	misc_RNA	.	.	NW_011550938.1:1119498-1141704	2550	0	0	0	0	0	0	0	0	0	0	0	0	0	0	0	0	0	0	0	0	0	0	0	0	0	0	0	0	0	0
XM_010906280	105031973	LOC105031973	ethylene-responsive transcription factor 1B	mRNA	XP_010904582.1	.	NW_011550938.1:1212814-1213920	1107	0	0	0	0	0	0	0	0	0	0	0	0	0	0	0	0	0	0	0	0	0	0	0	0	0	0	0	0	0	0
XM_010906281	105031974	LOC105031974	uncharacterized LOC105031974, transcript variant X1	mRNA	XP_010904583.1	.	NW_011550938.1:1220138-1230651	1550	0	0	0	0	0	0	0	0	0	0	0	0	0	0	0	0	0	0	0	0	0	0	0	0	0	0	0	0	0	0
XM_010906282	105031974	LOC105031974	uncharacterized LOC105031974, transcript variant X2	mRNA	XP_010904584.1	.	NW_011550938.1:1220138-1230652	1541	0	0	0	0	0	0	0	0	0	0	0	0	0	0	0	0	0	0	0	0	0	0	0	0	0	0	0	0	0	0
XM_010906283	105031974	LOC105031974	uncharacterized LOC105031974, transcript variant X3	mRNA	XP_010904585.1	.	NW_011550938.1:1220138-1230653	1539	0	0	0	0	0	0	0	0	0	0	0	0	0	0	0	0	0	0	0	0	0	0	0	0	0	0	0	0	0	0
XM_010906286	105031975	LOC105031975	serine/threonine-protein phosphatase PP1 isozyme 3, transcript variant X2	mRNA	XP_010904588.1	.	NW_011550938.1:1272742-1295293	1647	0	0	0	0	0	0	0	0	0	0	0	0	0	0	0	0	0	0	0	0	0	0	0	0	0	0	0	0	0	0
XM_010906285	105031975	LOC105031975	serine/threonine-protein phosphatase PP1 isozyme 3, transcript variant X1	mRNA	XP_010904587.1	.	NW_011550938.1:1272745-1295293	1857	0	0	0	0	0	0	0	0	0	0	0	0	0	0	0	0	0	0	0	0	0	0	0	0	0	0	0	0	0	0
XM_010906287	105031976	LOC105031976	probable inorganic phosphate transporter 1-4	mRNA	XP_010904589.1	.	NW_011550938.1:1316630-1319638	2222	0	0	0	0	0	0	0	0	0	0	0	0	0	0	0	0	0	0	0	0	0	0	0	0	0	0	0	0	0	0
XM_010906288	105031977	LOC105031977	CDT1-like protein a, chloroplastic	mRNA	XP_010904590.1	.	NW_011550938.1:1021163-1025608	2218	0	0	0	0	0	0	0	0	0	0	0	0	0	0	0	0	0	0	0	0	0	0	0	0	0	0	0	0	0	0
XM_029260864	105031978	LOC105031978	alpha carbonic anhydrase 7	mRNA	XP_029116697.1	.	NW_011550938.1:1404941-1408786	692	0	0	0	0	0	0	0	0	0	0	0	0	0	0	0	0	0	0	0	0	0	0	0	0	0	0	0	0	0	0
XM_029260866	105031979	LOC105031979	probable GDP-L-fucose synthase 1, transcript variant X3	mRNA	XP_029116699.1	.	NW_011550939.1:11918-22807	1584	0	0	0	0	0	0	0	0	0	0	0	0	0	0	0	0	0	0	0	0	0	0	0	0	0	0	0	0	0	0
XM_019846136	105031979	LOC105031979	probable GDP-L-fucose synthase 1, transcript variant X2	mRNA	XP_019701695.1	.	NW_011550939.1:15416-22807	1586	0	0	0	0	0	0	0	0	0	0	0	0	0	0	0	0	0	0	0	0	0	0	0	0	0	0	0	0	0	0
XM_010906290	105031979	LOC105031979	probable GDP-L-fucose synthase 1, transcript variant X1	mRNA	XP_010904592.1	.	NW_011550939.1:21345-22807	1361	0	0	0	0	0	0	0	0	0	0	0	0	0	0	0	0	0	0	0	0	0	0	0	0	0	0	0	0	0	0
XM_029260865	105031980	LOC105031980	probable GDP-L-fucose synthase 1	mRNA	XP_029116698.1	.	NW_011550939.1:76059-94713	1089	0	0	0	0	0	0	0	0	0	0	0	0	0	0	0	0	0	0	0	0	0	0	0	0	0	0	0	0	0	0
XM_019846142	105031981	LOC105031981	S-adenosylmethionine decarboxylase proenzyme	mRNA	XP_019701701.1	.	NW_011550939.1:111838-115809	1885	0	0	0	0	0	0	0	0	0	0	0	0	0	0	0	0	0	0	0	0	0	0	0	0	0	0	0	0	0	0
XM_010906293	105031982	LOC105031982	eukaryotic peptide chain release factor subunit 1-3, transcript variant X1	mRNA	XP_010904595.1	.	NW_011550939.1:137577-143489	2042	0	0	0	0	0	0	0	0	0	0	0	0	0	0	0	0	0	0	0	0	0	0	0	0	0	0	0	0	0	0
XM_010906294	105031982	LOC105031982	eukaryotic peptide chain release factor subunit 1-3, transcript variant X2	mRNA	XP_010904596.1	.	NW_011550939.1:137577-143489	2064	0	0	0	0	0	0	0	0	0	0	0	0	0	0	0	0	0	0	0	0	0	0	0	0	0	0	0	0	0	0
XM_010906295	105031982	LOC105031982	eukaryotic peptide chain release factor subunit 1-3, transcript variant X3	mRNA	XP_010904597.1	.	NW_011550939.1:137577-143489	2058	0	0	0	0	0	0	0	0	0	0	0	0	0	0	0	0	0	0	0	0	0	0	0	0	0	0	0	0	0	0
XM_010906296	105031982	LOC105031982	eukaryotic peptide chain release factor subunit 1-3, transcript variant X4	mRNA	XP_010904598.1	.	NW_011550939.1:137577-143489	2036	0	0	0	0	0	0	0	0	0	0	0	0	0	0	0	0	0	0	0	0	0	0	0	0	0	0	0	0	0	0
XR_829708	105031983	LOC105031983	uncharacterized LOC105031983	ncRNA	.	.	NW_011550939.1:182043-183032	715	0	0	0	0	0	0	0	0	0	0	0	0	0	0	0	0	0	0	0	0	0	0	0	0	0	0	0	0	0	0
XM_010906297	105031984	LOC105031984	HD domain-containing protein 2, transcript variant X2	mRNA	XP_010904599.1	.	NW_011550939.1:189112-202185	1204	0	0	0	0	0	0	0	0	0	0	0	0	0	0	0	0	0	0	0	0	0	0	0	0	0	0	0	0	0	0
XM_010906298	105031984	LOC105031984	HD domain-containing protein 2, transcript variant X1	mRNA	XP_010904600.1	.	NW_011550939.1:189140-202075	1052	0	0	0	0	0	0	0	0	0	0	0	0	0	0	0	0	0	0	0	0	0	0	0	0	0	0	0	0	0	0
XM_010906301	105031984	LOC105031984	HD domain-containing protein 2, transcript variant X4	mRNA	XP_010904603.1	.	NW_011550939.1:189140-202075	1089	0	0	0	0	0	0	0	0	0	0	0	0	0	0	0	0	0	0	0	0	0	0	0	0	0	0	0	0	0	0
XM_010906300	105031984	LOC105031984	HD domain-containing protein 2, transcript variant X3	mRNA	XP_010904602.1	.	NW_011550939.1:189140-202185	1213	0	0	0	0	0	0	0	0	0	0	0	0	0	0	0	0	0	0	0	0	0	0	0	0	0	0	0	0	0	0
XM_019846138	105031985	LOC105031985	putative clathrin assembly protein At5g35200	mRNA	XP_019701697.2	.	NW_011550939.1:225586-255179	2178	0	0	0	0	0	0	0	0	0	0	0	0	0	0	0	0	0	0	0	0	0	0	0	0	0	0	0	0	0	0
XR_003798652	105031986	LOC105031986	AFG1-like ATPase, transcript variant X2	misc_RNA	.	.	NW_011550939.1:279242-287917	2218	0	0	0	0	0	0	0	0	0	0	0	0	0	0	0	0	0	0	0	0	0	0	0	0	0	0	0	0	0	0
XM_010906304	105031986	LOC105031986	AFG1-like ATPase, transcript variant X1	mRNA	XP_010904606.1	.	NW_011550939.1:279582-287917	2100	0	0	0	0	0	0	0	0	0	0	0	0	0	0	0	0	0	0	0	0	0	0	0	0	0	0	0	0	0	0
XM_010906305	105031987	LOC105031987	E3 ubiquitin-protein ligase GW2	mRNA	XP_010904607.1	.	NW_011550939.1:328587-333199	1317	0	0	0	0	0	0	0	0	0	0	0	0	0	0	0	0	0	0	0	0	0	0	0	0	0	0	0	0	0	0
XM_010906306	105031988	LOC105031988	tetraspanin-7	mRNA	XP_010904608.1	.	NW_011550939.1:341850-345956	1194	0	0	0	0	0	0	0	0	0	0	0	0	0	0	0	0	0	0	0	0	0	0	0	0	0	0	0	0	0	0
XM_029261768	105031989	LOC105031989	putative receptor protein kinase ZmPK1	mRNA	XP_029117601.1	.	chr1:55505446-55506471	1026	0	0	0	0	0	0	0	0	0	0	0	0	0	0	0	0	0	0	0	0	0	0	0	0	0	0	0	0	0	0
XM_010906307	105031990	LOC105031990	very-long-chain aldehyde decarbonylase GL1-3-like	mRNA	XP_010904609.1	.	NW_011550939.1:360106-367480	2208	0	0	0	0	0	0	0	0	0	0	0	0	0	0	0	0	0	0	0	0	0	0	0	0	0	0	0	0	0	0
XM_010906308	105031991	LOC105031991	transcription factor IBH1-like 1	mRNA	XP_010904610.2	.	NW_011550939.1:502858-504080	1056	0	0	0	0	0	0	0	0	0	0	0	0	0	0	0	0	0	0	0	0	0	0	0	0	0	0	0	0	0	0
XM_010906309	105031992	LOC105031992	uncharacterized LOC105031992	mRNA	XP_010904611.1	.	NW_011550939.1:521255-523567	2037	0	0	0	0	0	0	0	0	0	0	0	0	0	0	0	0	0	0	0	0	0	0	0	0	0	0	0	0	0	0
XM_010906311	105031993	LOC105031993	uncharacterized LOC105031993	mRNA	XP_010904613.1	.	NW_011550939.1:708686-710365	1587	0	0	0	0	0	0	0	0	0	0	0	0	0	0	0	0	0	0	0	0	0	0	0	0	0	0	0	0	0	0
XM_010906312	105031994	LOC105031994	probable inactive ATP-dependent zinc metalloprotease FTSHI 3, chloroplastic	mRNA	XP_010904614.1	.	NW_011550939.1:746254-756957	3156	0	0	0	0	0	0	0	0	0	0	0	0	0	0	0	0	0	0	0	0	0	0	0	0	0	0	0	0	0	0
XM_010906313	105031995	LOC105031995	uncharacterized LOC105031995	mRNA	XP_010904615.1	.	NW_011550939.1:266293-266808	516	0	0	0	0	0	0	0	0	0	0	0	0	0	0	0	0	0	0	0	0	0	0	0	0	0	0	0	0	0	0
XM_010906314	105031996	LOC105031996	pentatricopeptide repeat-containing protein At4g31070, mitochondrial	mRNA	XP_010904616.1	.	NW_011550939.1:301593-303143	1551	0	0	0	0	0	0	0	0	0	0	0	0	0	0	0	0	0	0	0	0	0	0	0	0	0	0	0	0	0	0
gene-LOC105031997	105031997	LOC105031997	.	Gene	.	.	NW_011550939.1:593514-594135	622	0	0	0	0	0	0	0	0	0	0	0	0	0	0	0	0	0	0	0	0	0	0	0	0	0	0	0	0	0	0
gene-LOC105031998	105031998	LOC105031998	.	Gene	.	.	NW_011550939.1:609947-654289	1416	0	0	0	0	0	0	0	0	0	0	0	0	0	0	0	0	0	0	0	0	0	0	0	0	0	0	0	0	0	0
gene-LOC105031999	105031999	LOC105031999	.	Gene	.	.	NW_011550939.1:732934-734145	783	0	0	0	0	0	0	0	0	0	0	0	0	0	0	0	0	0	0	0	0	0	0	0	0	0	0	0	0	0	0
gene-LOC105032000	105032000	LOC105032000	.	Gene	.	.	NW_011550939.1:780039-794579	2307	0	0	0	0	0	0	0	0	0	0	0	0	0	0	0	0	0	0	0	0	0	0	0	0	0	0	0	0	0	0
XM_010906316	105032001	LOC105032001	protein STRICTOSIDINE SYNTHASE-LIKE 10-like	mRNA	XP_010904618.1	.	NW_011550939.1:892528-893086	559	0	0	0	0	0	0	0	0	0	0	0	0	0	0	0	0	0	0	0	0	0	0	0	0	0	0	0	0	0	0
XM_010906317	105032002	LOC105032002	S-adenosylmethionine decarboxylase proenzyme	mRNA	XP_010904619.1	.	NW_011550939.1:1145485-1148206	1758	0	0	0	0	0	0	0	0	0	0	0	0	0	0	0	0	0	0	0	0	0	0	0	0	0	0	0	0	0	0
XM_029260867	105032003	LOC105032003	exocyst complex component EXO70B1-like	mRNA	XP_029116700.1	.	NW_011550940.1:94154-96517	2364	0	0	0	0	0	0	0	0	0	0	0	0	0	0	0	0	0	0	0	0	0	0	0	0	0	0	0	0	0	0
XM_010906319	105032004	LOC105032004	F-box protein SKIP1	mRNA	XP_010904621.1	.	NW_011550940.1:313518-318433	1266	0	0	0	0	0	0	0	0	0	0	0	0	0	0	0	0	0	0	0	0	0	0	0	0	0	0	0	0	0	0
XM_010906320	105032005	LOC105032005	eukaryotic translation initiation factor	mRNA	XP_010904622.1	.	NW_011550940.1:540604-567779	2823	0	0	0	0	0	0	0	0	0	0	0	0	0	0	0	0	0	0	0	0	0	0	0	0	0	0	0	0	0	0
XM_010906321	105032006	LOC105032006	pentatricopeptide repeat-containing protein At1g08070, chloroplastic	mRNA	XP_010904623.1	.	NW_011550940.1:589363-591398	1957	0	0	0	0	0	0	0	0	0	0	0	0	0	0	0	0	0	0	0	0	0	0	0	0	0	0	0	0	0	0
XM_010906322	105032007	LOC105032007	molybdopterin synthase catalytic subunit-like	mRNA	XP_010904624.2	.	NW_011550940.1:684222-685012	791	0	0	0	0	0	0	0	0	0	0	0	0	0	0	0	0	0	0	0	0	0	0	0	0	0	0	0	0	0	0
XM_029260870	105032008	LOC105032008	protein MULTIPOLAR SPINDLE 1, transcript variant X4	mRNA	XP_029116703.1	.	NW_011550940.1:712217-741415	1648	0	0	0	0	0	0	0	0	0	0	0	0	0	0	0	0	0	0	0	0	0	0	0	0	0	0	0	0	0	0
XM_010906323	105032008	LOC105032008	protein MULTIPOLAR SPINDLE 1, transcript variant X1	mRNA	XP_010904625.1	.	NW_011550940.1:712218-741962	2148	0	0	0	0	0	0	0	0	0	0	0	0	0	0	0	0	0	0	0	0	0	0	0	0	0	0	0	0	0	0
XM_029260868	105032008	LOC105032008	protein MULTIPOLAR SPINDLE 1, transcript variant X2	mRNA	XP_029116701.1	.	NW_011550940.1:712218-741962	2145	0	0	0	0	0	0	0	0	0	0	0	0	0	0	0	0	0	0	0	0	0	0	0	0	0	0	0	0	0	0
XM_029260869	105032008	LOC105032008	protein MULTIPOLAR SPINDLE 1, transcript variant X3	mRNA	XP_029116702.1	.	NW_011550940.1:712218-741962	2007	0	0	0	0	0	0	0	0	0	0	0	0	0	0	0	0	0	0	0	0	0	0	0	0	0	0	0	0	0	0
XM_010906326	105032009	LOC105032009	alanine--tRNA ligase-like	mRNA	XP_010904628.1	.	NW_011550940.1:904946-924971	3452	0	0	0	0	0	0	0	0	0	0	0	0	0	0	0	0	0	0	0	0	0	0	0	0	0	0	0	0	0	0
XR_003798655	105032010	LOC105032010	uncharacterized LOC105032010, transcript variant X3	misc_RNA	.	.	NW_011550940.1:926948-937840	1133	0	0	0	0	0	0	0	0	0	0	0	0	0	0	0	0	0	0	0	0	0	0	0	0	0	0	0	0	0	0
XM_010906328	105032010	LOC105032010	uncharacterized LOC105032010, transcript variant X2	mRNA	XP_010904630.1	.	NW_011550940.1:926974-937682	762	0	0	0	0	0	0	0	0	0	0	0	0	0	0	0	0	0	0	0	0	0	0	0	0	0	0	0	0	0	0
XM_010906327	105032010	LOC105032010	uncharacterized LOC105032010, transcript variant X1	mRNA	XP_010904629.1	.	NW_011550940.1:926974-937840	1039	0	0	0	0	0	0	0	0	0	0	0	0	0	0	0	0	0	0	0	0	0	0	0	0	0	0	0	0	0	0
XM_010906329	105032011	LOC105032011	uncharacterized LOC105032011, transcript variant X1	mRNA	XP_010904631.1	.	NW_011550940.1:1142650-1146428	2145	0	0	0	0	0	0	0	0	0	0	0	0	0	0	0	0	0	0	0	0	0	0	0	0	0	0	0	0	0	0
XM_010906330	105032011	LOC105032011	uncharacterized LOC105032011, transcript variant X4	mRNA	XP_010904632.1	.	NW_011550940.1:1142650-1146428	2049	0	0	0	0	0	0	0	0	0	0	0	0	0	0	0	0	0	0	0	0	0	0	0	0	0	0	0	0	0	0
XM_019846144	105032011	LOC105032011	uncharacterized LOC105032011, transcript variant X2	mRNA	XP_019701703.1	.	NW_011550940.1:1142650-1146428	2139	0	0	0	0	0	0	0	0	0	0	0	0	0	0	0	0	0	0	0	0	0	0	0	0	0	0	0	0	0	0
XM_029260871	105032011	LOC105032011	uncharacterized LOC105032011, transcript variant X3	mRNA	XP_029116704.1	.	NW_011550940.1:1142652-1146428	2216	0	0	0	0	0	0	0	0	0	0	0	0	0	0	0	0	0	0	0	0	0	0	0	0	0	0	0	0	0	0
XR_829714	105032012	LOC105032012	DNA-directed RNA polymerase 3B, chloroplastic, transcript variant X4	misc_RNA	.	.	NW_011550940.1:1309027-1332234	3097	0	0	0	0	0	0	0	0	0	0	0	0	0	0	0	0	0	0	0	0	0	0	0	0	0	0	0	0	0	0
XM_010906332	105032012	LOC105032012	DNA-directed RNA polymerase 3B, chloroplastic, transcript variant X3	mRNA	XP_010904634.1	.	NW_011550940.1:1309027-1333127	3748	0	0	0	0	0	0	0	0	0	0	0	0	0	0	0	0	0	0	0	0	0	0	0	0	0	0	0	0	0	0
XM_010906331	105032012	LOC105032012	DNA-directed RNA polymerase 3B, chloroplastic, transcript variant X1	mRNA	XP_010904633.1	.	NW_011550940.1:1309028-1333127	3798	0	0	0	0	0	0	0	0	0	0	0	0	0	0	0	0	0	0	0	0	0	0	0	0	0	0	0	0	0	0
XR_829713	105032012	LOC105032012	DNA-directed RNA polymerase 3B, chloroplastic, transcript variant X2	misc_RNA	.	.	NW_011550940.1:1309028-1333127	3705	0	0	0	0	0	0	0	0	0	0	0	0	0	0	0	0	0	0	0	0	0	0	0	0	0	0	0	0	0	0
XR_829715	105032013	LOC105032013	uncharacterized LOC105032013	ncRNA	.	.	NW_011550941.1:133740-136446	537	0	0	0	0	0	0	0	0	0	0	0	0	0	0	0	0	0	0	0	0	0	0	0	0	0	0	0	0	0	0
XM_029260873	105032014	LOC105032014	protein arv1 homolog, transcript variant X4	mRNA	XP_029116706.1	.	NW_011550941.1:187800-198465	1546	0	0	0	0	0	0	0	0	0	0	0	0	0	0	0	0	0	0	0	0	0	0	0	0	0	0	0	0	0	0
XM_010906334	105032014	LOC105032014	protein arv1 homolog, transcript variant X1	mRNA	XP_010904636.1	.	NW_011550941.1:187800-208236	1680	0	0	0	0	0	0	0	0	0	0	0	0	0	0	0	0	0	0	0	0	0	0	0	0	0	0	0	0	0	0
XM_010906335	105032014	LOC105032014	protein arv1 homolog, transcript variant X3	mRNA	XP_010904637.1	.	NW_011550941.1:187800-208236	1661	0	0	0	0	0	0	0	0	0	0	0	0	0	0	0	0	0	0	0	0	0	0	0	0	0	0	0	0	0	0
XR_003798656	105032014	LOC105032014	protein arv1 homolog, transcript variant X2	misc_RNA	.	.	NW_011550941.1:187800-210017	1518	0	0	0	0	0	0	0	0	0	0	0	0	0	0	0	0	0	0	0	0	0	0	0	0	0	0	0	0	0	0
XM_019846149	105032015	LOC105032015	V-type proton ATPase subunit G-like, transcript variant X1	mRNA	XP_019701708.1	.	NW_011550941.1:210696-238436	705	0	0	0	0	0	0	0	0	0	0	0	0	0	0	0	0	0	0	0	0	0	0	0	0	0	0	0	0	0	0
XM_029260872	105032015	LOC105032015	V-type proton ATPase subunit G-like, transcript variant X2	mRNA	XP_029116705.1	.	NW_011550941.1:210696-238436	764	0	0	0	0	0	0	0	0	0	0	0	0	0	0	0	0	0	0	0	0	0	0	0	0	0	0	0	0	0	0
XM_010906336	105032016	LOC105032016	patatin-like protein 3	mRNA	XP_010904638.1	.	NW_011550941.1:253635-255784	1741	0	0	0	0	0	0	0	0	0	0	0	0	0	0	0	0	0	0	0	0	0	0	0	0	0	0	0	0	0	0
XM_019846148	105032017	LOC105032017	pupal cuticle protein 36	mRNA	XP_019701707.1	.	NW_011550941.1:333883-335220	1188	0	0	0	0	0	0	0	0	0	0	0	0	0	0	0	0	0	0	0	0	0	0	0	0	0	0	0	0	0	0
XM_010906338	105032018	LOC105032018	DEAD-box ATP-dependent RNA helicase 53, transcript variant X1	mRNA	XP_010904640.1	.	NW_011550941.1:436350-448297	2533	0	0	0	0	0	0	0	0	0	0	0	0	0	0	0	0	0	0	0	0	0	0	0	0	0	0	0	0	0	0
XM_010906339	105032018	LOC105032018	DEAD-box ATP-dependent RNA helicase 53, transcript variant X2	mRNA	XP_010904641.1	.	NW_011550941.1:436350-448297	2609	0	0	0	0	0	0	0	0	0	0	0	0	0	0	0	0	0	0	0	0	0	0	0	0	0	0	0	0	0	0
XR_829718	105032019	LOC105032019	uncharacterized LOC105032019	ncRNA	.	.	chr1:60798263-60799465	384	0	0	0	0	0	0	0	0	0	0	0	0	0	0	0	0	0	0	0	0	0	0	0	0	0	0	0	0	0	0
XM_010906341	105032021	LOC105032021	vacuolar protein sorting-associated protein 2 homolog 2	mRNA	XP_010904643.1	.	NW_011550941.1:538392-544670	1187	0	0	0	0	0	0	0	0	0	0	0	0	0	0	0	0	0	0	0	0	0	0	0	0	0	0	0	0	0	0
XM_010906342	105032022	LOC105032022	DNA repair protein recA homolog 1, chloroplastic	mRNA	XP_010904644.1	.	NW_011550941.1:545700-557779	2060	0	0	0	0	0	0	0	0	0	0	0	0	0	0	0	0	0	0	0	0	0	0	0	0	0	0	0	0	0	0
XM_010906345	105032023	LOC105032023	protein LOL3, transcript variant X1	mRNA	XP_010904647.1	.	NW_011550941.1:584161-597349	1327	0	0	0	0	0	0	0	0	0	0	0	0	0	0	0	0	0	0	0	0	0	0	0	0	0	0	0	0	0	0
XM_010906346	105032023	LOC105032023	protein LOL3, transcript variant X2	mRNA	XP_010904648.1	.	NW_011550941.1:584161-597349	1213	0	0	0	0	0	0	0	0	0	0	0	0	0	0	0	0	0	0	0	0	0	0	0	0	0	0	0	0	0	0
XM_010906350	105032024	LOC105032024	uncharacterized LOC105032024	mRNA	XP_010904652.1	.	chr1:60865242-60869687	1625	0	0	0	0	0	0	0	0	0	0	0	0	0	0	0	0	0	0	0	0	0	0	0	0	0	0	0	0	0	0
XM_010906347	105032025	LOC105032025	CASP-like protein 1B1	mRNA	XP_010904649.1	.	NW_011550941.1:600190-601501	872	0	0	0	0	0	0	0	0	0	0	0	0	0	0	0	0	0	0	0	0	0	0	0	0	0	0	0	0	0	0
XM_010906348	105032026	LOC105032026	NAC domain-containing protein 21/22	mRNA	XP_010904650.1	.	NW_011550941.1:603687-608241	1141	0	0	0	0	0	0	0	0	0	0	0	0	0	0	0	0	0	0	0	0	0	0	0	0	0	0	0	0	0	0
XM_029260874	105032027	LOC105032027	uncharacterized LOC105032027	mRNA	XP_029116707.1	.	NW_011550941.1:629341-631776	2257	0	0	0	0	0	0	0	0	0	0	0	0	0	0	0	0	0	0	0	0	0	0	0	0	0	0	0	0	0	0
XM_010906355	105032028	LOC105032028	transcription factor PHYTOCHROME INTERACTING FACTOR-LIKE 13, transcript variant X4	mRNA	XP_010904657.1	.	NW_011550941.1:713777-719430	2269	0	0	0	0	0	0	0	0	0	0	0	0	0	0	0	0	0	0	0	0	0	0	0	0	0	0	0	0	0	0
XM_010906356	105032028	LOC105032028	transcription factor PHYTOCHROME INTERACTING FACTOR-LIKE 13, transcript variant X5	mRNA	XP_010904658.1	.	NW_011550941.1:714040-719430	2072	0	0	0	0	0	0	0	0	0	0	0	0	0	0	0	0	0	0	0	0	0	0	0	0	0	0	0	0	0	0
XM_010906357	105032028	LOC105032028	transcription factor PHYTOCHROME INTERACTING FACTOR-LIKE 13, transcript variant X6	mRNA	XP_010904659.1	.	NW_011550941.1:714040-719430	2069	0	0	0	0	0	0	0	0	0	0	0	0	0	0	0	0	0	0	0	0	0	0	0	0	0	0	0	0	0	0
XM_010906352	105032028	LOC105032028	transcription factor PHYTOCHROME INTERACTING FACTOR-LIKE 13, transcript variant X2	mRNA	XP_010904654.1	.	NW_011550941.1:714051-718573	1962	0	0	0	0	0	0	0	0	0	0	0	0	0	0	0	0	0	0	0	0	0	0	0	0	0	0	0	0	0	0
XM_010906351	105032028	LOC105032028	transcription factor PHYTOCHROME INTERACTING FACTOR-LIKE 13, transcript variant X1	mRNA	XP_010904653.1	.	NW_011550941.1:714051-719430	2100	0	0	0	0	0	0	0	0	0	0	0	0	0	0	0	0	0	0	0	0	0	0	0	0	0	0	0	0	0	0
XM_010906353	105032028	LOC105032028	transcription factor PHYTOCHROME INTERACTING FACTOR-LIKE 13, transcript variant X3	mRNA	XP_010904655.1	.	NW_011550941.1:714051-719430	2082	0	0	0	0	0	0	0	0	0	0	0	0	0	0	0	0	0	0	0	0	0	0	0	0	0	0	0	0	0	0
XM_010906358	105032028	LOC105032028	transcription factor PHYTOCHROME INTERACTING FACTOR-LIKE 13, transcript variant X8	mRNA	XP_010904660.1	.	NW_011550941.1:714051-719430	2046	0	0	0	0	0	0	0	0	0	0	0	0	0	0	0	0	0	0	0	0	0	0	0	0	0	0	0	0	0	0
XM_029260875	105032028	LOC105032028	transcription factor PHYTOCHROME INTERACTING FACTOR-LIKE 13, transcript variant X7	mRNA	XP_029116708.1	.	NW_011550941.1:715193-719430	2246	0	0	0	0	0	0	0	0	0	0	0	0	0	0	0	0	0	0	0	0	0	0	0	0	0	0	0	0	0	0
XM_029260877	105032028	LOC105032028	transcription factor PHYTOCHROME INTERACTING FACTOR-LIKE 13, transcript variant X9	mRNA	XP_029116710.1	.	NW_011550941.1:715193-719430	2192	0	0	0	0	0	0	0	0	0	0	0	0	0	0	0	0	0	0	0	0	0	0	0	0	0	0	0	0	0	0
XM_010906362	105032029	LOC105032029	uncharacterized oxidoreductase At1g06690, chloroplastic, transcript variant X5	mRNA	XP_010904664.1	.	NW_011550941.1:902093-909836	1374	0	0	0	0	0	0	0	0	0	0	0	0	0	0	0	0	0	0	0	0	0	0	0	0	0	0	0	0	0	0
XM_029260878	105032029	LOC105032029	uncharacterized oxidoreductase At1g06690, chloroplastic, transcript variant X2	mRNA	XP_029116711.1	.	NW_011550941.1:902093-910085	1594	0	0	0	0	0	0	0	0	0	0	0	0	0	0	0	0	0	0	0	0	0	0	0	0	0	0	0	0	0	0
XM_010906360	105032029	LOC105032029	uncharacterized oxidoreductase At1g06690, chloroplastic, transcript variant X1	mRNA	XP_010904662.1	.	NW_011550941.1:902093-910246	1558	0	0	0	0	0	0	0	0	0	0	0	0	0	0	0	0	0	0	0	0	0	0	0	0	0	0	0	0	0	0
XM_010906361	105032029	LOC105032029	uncharacterized oxidoreductase At1g06690, chloroplastic, transcript variant X3	mRNA	XP_010904663.1	.	NW_011550941.1:902093-910246	1540	0	0	0	0	0	0	0	0	0	0	0	0	0	0	0	0	0	0	0	0	0	0	0	0	0	0	0	0	0	0
XM_029260879	105032029	LOC105032029	uncharacterized oxidoreductase At1g06690, chloroplastic, transcript variant X4	mRNA	XP_029116712.1	.	NW_011550941.1:902197-910247	1532	0	0	0	0	0	0	0	0	0	0	0	0	0	0	0	0	0	0	0	0	0	0	0	0	0	0	0	0	0	0
XM_019849141	105032030	LOC105032030	equilibrative nucleotide transporter 3, transcript variant X4	mRNA	XP_019704700.1	.	chr1:60882973-60890422	1692	0	0	0	0	0	0	0	0	0	0	0	0	0	0	0	0	0	0	0	0	0	0	0	0	0	0	0	0	0	0
XM_029260799	105032030	LOC105032030	equilibrative nucleotide transporter 3, transcript variant X5	mRNA	XP_029116632.1	.	chr1:60882973-60890604	1803	0	0	0	0	0	0	0	0	0	0	0	0	0	0	0	0	0	0	0	0	0	0	0	0	0	0	0	0	0	0
XM_010906381	105032030	LOC105032030	equilibrative nucleotide transporter 3, transcript variant X3	mRNA	XP_010904683.1	.	chr1:60882973-60890731	1790	0	0	0	0	0	0	0	0	0	0	0	0	0	0	0	0	0	0	0	0	0	0	0	0	0	0	0	0	0	0
XM_019849155	105032030	LOC105032030	equilibrative nucleotide transporter 3, transcript variant X7	mRNA	XP_019704714.1	.	chr1:60882973-60890731	1642	0	0	0	0	0	0	0	0	0	0	0	0	0	0	0	0	0	0	0	0	0	0	0	0	0	0	0	0	0	0
XM_010906364	105032030	LOC105032030	equilibrative nucleotide transporter 3, transcript variant X1	mRNA	XP_010904666.1	.	chr1:60882973-60890977	1753	0	0	0	0	0	0	0	0	0	0	0	0	0	0	0	0	0	0	0	0	0	0	0	0	0	0	0	0	0	0
XM_010906371	105032030	LOC105032030	equilibrative nucleotide transporter 3, transcript variant X2	mRNA	XP_010904673.1	.	chr1:60882973-60890978	1689	0	0	0	0	0	0	0	0	0	0	0	0	0	0	0	0	0	0	0	0	0	0	0	0	0	0	0	0	0	0
XM_029260801	105032030	LOC105032030	equilibrative nucleotide transporter 3, transcript variant X6	mRNA	XP_029116634.1	.	chr1:60882973-60907115	1972	13	37	34	91	163	13	0	251	194	7	0.312626	0.960196	3.72523	9.138	13.2744	0.317117	0	26.6169	22.3591	0.163496	0.43225	1.34394	6.98142	15.7807	23.6467	0.389578	0	52.4254	42.1685	0.205877
XM_010906363	105032031	LOC105032031	protein app1	mRNA	XP_010904665.1	.	NW_011550941.1:919868-920637	770	0	0	0	0	0	0	0	0	0	0	0	0	0	0	0	0	0	0	0	0	0	0	0	0	0	0	0	0	0	0
XM_010906367	105032032	LOC105032032	reticulon-like protein B8, transcript variant X2	mRNA	XP_010904669.1	.	NW_011550941.1:968820-978777	1083	0	0	0	0	0	0	0	0	0	0	0	0	0	0	0	0	0	0	0	0	0	0	0	0	0	0	0	0	0	0
XM_010906366	105032032	LOC105032032	reticulon-like protein B8, transcript variant X1	mRNA	XP_010904668.1	.	NW_011550941.1:968820-978925	1043	0	0	0	0	0	0	0	0	0	0	0	0	0	0	0	0	0	0	0	0	0	0	0	0	0	0	0	0	0	0
XM_010906365	105032032	LOC105032032	reticulon-like protein B8, transcript variant X3	mRNA	XP_010904667.1	.	NW_011550941.1:968820-979066	1141	0	0	0	0	0	0	0	0	0	0	0	0	0	0	0	0	0	0	0	0	0	0	0	0	0	0	0	0	0	0
XR_829720	105032033	LOC105032033	uncharacterized LOC105032033	ncRNA	.	.	NW_011550941.1:998710-1006993	663	0	0	0	0	0	0	0	0	0	0	0	0	0	0	0	0	0	0	0	0	0	0	0	0	0	0	0	0	0	0
XM_010906368	105032034	LOC105032034	uncharacterized LOC105032034	mRNA	XP_010904670.1	.	NW_011550941.1:1044105-1050292	1976	0	0	0	0	0	0	0	0	0	0	0	0	0	0	0	0	0	0	0	0	0	0	0	0	0	0	0	0	0	0
XM_010906404	105032035	LOC105032035	transmembrane 9 superfamily member 7, transcript variant X1	mRNA	XP_010904706.1	.	chr1:4890883-4896805	2030	306	335	954	909	1126	0	238	1063	945	229	7.68316	8.58461	104.194	89.6033	89.3475	0	5.27172	109.673	105.749	5.5767	10.6231	12.0154	195.269	154.739	159.162	0	6.92863	216.015	199.438	7.02226
XM_010906474	105032035	LOC105032035	transmembrane 9 superfamily member 7, transcript variant X2	mRNA	XP_010904776.1	.	chr1:4890883-4896805	2027	0	0	0	0	0	222	0	0	0	0	0	0	0	0	0	5.51666	0	0	0	0	0	0	0	0	0	6.7772	0	0	0	0
XR_829721	105032036	LOC105032036	uncharacterized LOC105032036	ncRNA	.	.	NW_011550941.1:1063819-1067080	549	0	0	0	0	0	0	0	0	0	0	0	0	0	0	0	0	0	0	0	0	0	0	0	0	0	0	0	0	0	0
XM_010906369	105032037	LOC105032037	pentatricopeptide repeat-containing protein At1g79080, chloroplastic	mRNA	XP_010904671.1	.	NW_011550941.1:1086099-1088413	2315	0	0	0	0	0	0	0	0	0	0	0	0	0	0	0	0	0	0	0	0	0	0	0	0	0	0	0	0	0	0
XM_010906370	105032038	LOC105032038	WD repeat-containing protein 75, transcript variant X1	mRNA	XP_010904672.1	.	NW_011550941.1:1091066-1115310	2983	0	0	0	0	0	0	0	0	0	0	0	0	0	0	0	0	0	0	0	0	0	0	0	0	0	0	0	0	0	0
XM_010906372	105032038	LOC105032038	WD repeat-containing protein 75, transcript variant X2	mRNA	XP_010904674.1	.	NW_011550941.1:1091066-1115310	2965	0	0	0	0	0	0	0	0	0	0	0	0	0	0	0	0	0	0	0	0	0	0	0	0	0	0	0	0	0	0
XM_029260881	105032038	LOC105032038	WD repeat-containing protein 75, transcript variant X3	mRNA	XP_029116714.1	.	NW_011550941.1:1091066-1115310	2965	0	0	0	0	0	0	0	0	0	0	0	0	0	0	0	0	0	0	0	0	0	0	0	0	0	0	0	0	0	0
XM_029260883	105032038	LOC105032038	WD repeat-containing protein 75, transcript variant X4	mRNA	XP_029116716.1	.	NW_011550941.1:1091066-1115310	2947	0	0	0	0	0	0	0	0	0	0	0	0	0	0	0	0	0	0	0	0	0	0	0	0	0	0	0	0	0	0
XM_029260884	105032039	LOC105032039	probable ribose-5-phosphate isomerase 4, chloroplastic, transcript variant X1	mRNA	XP_029116717.1	.	NW_011550941.1:1188735-1196993	1329	0	0	0	0	0	0	0	0	0	0	0	0	0	0	0	0	0	0	0	0	0	0	0	0	0	0	0	0	0	0
XM_010906374	105032039	LOC105032039	probable ribose-5-phosphate isomerase 4, chloroplastic, transcript variant X2	mRNA	XP_010904676.1	.	NW_011550941.1:1188737-1196931	1178	0	0	0	0	0	0	0	0	0	0	0	0	0	0	0	0	0	0	0	0	0	0	0	0	0	0	0	0	0	0
XM_010906376	105032040	LOC105032040	thiamine transporter 2, transcript variant X2	mRNA	XP_010904678.1	.	NW_011550941.1:1197647-1213701	2029	0	0	0	0	0	0	0	0	0	0	0	0	0	0	0	0	0	0	0	0	0	0	0	0	0	0	0	0	0	0
XM_010906375	105032040	LOC105032040	thiamine transporter 2, transcript variant X1	mRNA	XP_010904677.1	.	NW_011550941.1:1197647-1213704	2035	0	0	0	0	0	0	0	0	0	0	0	0	0	0	0	0	0	0	0	0	0	0	0	0	0	0	0	0	0	0
XM_010906380	105032040	LOC105032040	thiamine transporter 2, transcript variant X3	mRNA	XP_010904682.1	.	NW_011550941.1:1197647-1213705	2093	0	0	0	0	0	0	0	0	0	0	0	0	0	0	0	0	0	0	0	0	0	0	0	0	0	0	0	0	0	0
XM_019846152	105032040	LOC105032040	thiamine transporter 2, transcript variant X4	mRNA	XP_019701711.1	.	NW_011550941.1:1197647-1213705	1927	0	0	0	0	0	0	0	0	0	0	0	0	0	0	0	0	0	0	0	0	0	0	0	0	0	0	0	0	0	0
XR_829722	105032041	LOC105032041	uncharacterized LOC105032041, transcript variant X1	ncRNA	.	.	NW_011550941.1:1235972-1238989	1618	0	0	0	0	0	0	0	0	0	0	0	0	0	0	0	0	0	0	0	0	0	0	0	0	0	0	0	0	0	0
XR_829723	105032041	LOC105032041	uncharacterized LOC105032041, transcript variant X2	ncRNA	.	.	NW_011550941.1:1235972-1238989	1521	0	0	0	0	0	0	0	0	0	0	0	0	0	0	0	0	0	0	0	0	0	0	0	0	0	0	0	0	0	0
XM_010906382	105032042	LOC105032042	probable 2-oxoglutarate-dependent dioxygenase At3g111800	mRNA	XP_010904684.1	.	NW_011550941.1:7410-12661	835	0	0	0	0	0	0	0	0	0	0	0	0	0	0	0	0	0	0	0	0	0	0	0	0	0	0	0	0	0	0
XM_019846147	105032043	LOC105032043	oxygen-evolving enhancer protein 2, chloroplastic	mRNA	XP_019701706.1	.	NW_011550941.1:1052981-1055013	1075	0	0	0	0	0	0	0	0	0	0	0	0	0	0	0	0	0	0	0	0	0	0	0	0	0	0	0	0	0	0
XM_010906383	105032044	LOC105032044	cell death-related nuclease 4, transcript variant X1	mRNA	XP_010904685.1	.	NW_011550942.1:10571-30475	1762	0	0	0	0	0	0	0	0	0	0	0	0	0	0	0	0	0	0	0	0	0	0	0	0	0	0	0	0	0	0
XM_019846158	105032044	LOC105032044	cell death-related nuclease 4, transcript variant X2	mRNA	XP_019701717.1	.	NW_011550942.1:10658-30475	1815	0	0	0	0	0	0	0	0	0	0	0	0	0	0	0	0	0	0	0	0	0	0	0	0	0	0	0	0	0	0
XM_010906384	105032045	LOC105032045	dihydropyrimidinase, transcript variant X1	mRNA	XP_010904686.2	.	NW_011550942.1:33019-43034	2072	0	0	0	0	0	0	0	0	0	0	0	0	0	0	0	0	0	0	0	0	0	0	0	0	0	0	0	0	0	0
XM_019846168	105032045	LOC105032045	dihydropyrimidinase, transcript variant X2	mRNA	XP_019701727.1	.	NW_011550942.1:33019-43034	1733	0	0	0	0	0	0	0	0	0	0	0	0	0	0	0	0	0	0	0	0	0	0	0	0	0	0	0	0	0	0
XM_010906385	105032046	LOC105032046	splicing factor 3B subunit 6-like protein	mRNA	XP_010904687.1	.	NW_011550942.1:46485-47313	829	0	0	0	0	0	0	0	0	0	0	0	0	0	0	0	0	0	0	0	0	0	0	0	0	0	0	0	0	0	0
XM_010906386	105032047	LOC105032047	uncharacterized LOC105032047	mRNA	XP_010904688.1	.	NW_011550942.1:58833-59929	1030	0	0	0	0	0	0	0	0	0	0	0	0	0	0	0	0	0	0	0	0	0	0	0	0	0	0	0	0	0	0
XM_019846165	105032048	LOC105032048	transcription factor TGA2.3	mRNA	XP_019701724.2	.	NW_011550942.1:63045-79211	1599	0	0	0	0	0	0	0	0	0	0	0	0	0	0	0	0	0	0	0	0	0	0	0	0	0	0	0	0	0	0
XM_010906390	105032049	LOC105032049	calcium-dependent protein kinase 2	mRNA	XP_010904692.1	.	NW_011550942.1:88540-97189	1917	0	0	0	0	0	0	0	0	0	0	0	0	0	0	0	0	0	0	0	0	0	0	0	0	0	0	0	0	0	0
XM_010906391	105032050	LOC105032050	uncharacterized LOC105032050	mRNA	XP_010904693.2	.	NW_011550942.1:124799-125479	679	0	0	0	0	0	0	0	0	0	0	0	0	0	0	0	0	0	0	0	0	0	0	0	0	0	0	0	0	0	0
XM_010906393	105032052	LOC105032052	myb family transcription factor PHL7, transcript variant X2	mRNA	XP_010904695.1	.	NW_011550942.1:145546-152471	1437	0	0	0	0	0	0	0	0	0	0	0	0	0	0	0	0	0	0	0	0	0	0	0	0	0	0	0	0	0	0
XM_010906392	105032052	LOC105032052	myb family transcription factor PHL7, transcript variant X1	mRNA	XP_010904694.1	.	NW_011550942.1:145546-152634	1596	0	0	0	0	0	0	0	0	0	0	0	0	0	0	0	0	0	0	0	0	0	0	0	0	0	0	0	0	0	0
XM_010906394	105032053	LOC105032053	leucine-rich repeat protein 1, transcript variant X1	mRNA	XP_010904696.1	.	NW_011550942.1:158494-171562	1075	0	0	0	0	0	0	0	0	0	0	0	0	0	0	0	0	0	0	0	0	0	0	0	0	0	0	0	0	0	0
XR_829725	105032053	LOC105032053	leucine-rich repeat protein 1, transcript variant X2	misc_RNA	.	.	NW_011550942.1:158494-171579	1001	0	0	0	0	0	0	0	0	0	0	0	0	0	0	0	0	0	0	0	0	0	0	0	0	0	0	0	0	0	0
gene-LOC105032054	105032054	LOC105032054	.	Gene	.	.	chr1:60939545-60941695	2151	5	1	5	6	6	5	0	5	4	7	0.117564	0.008505	0.413244	0.550945	0.375713	0.09841	0	0.453501	0.399706	0.150195	0.162548	0.011903	0.774455	0.951443	0.669285	0.120896	0	0.893227	0.753833	0.189128
XM_010906395	105032055	LOC105032055	L-2-hydroxyglutarate dehydrogenase, mitochondrial	mRNA	XP_010904697.1	.	NW_011550942.1:176350-183069	1802	0	0	0	0	0	0	0	0	0	0	0	0	0	0	0	0	0	0	0	0	0	0	0	0	0	0	0	0	0	0
XM_010906396	105032056	LOC105032056	L-aminoadipate-semialdehyde dehydrogenase-phosphopantetheinyl transferase, transcript variant X1	mRNA	XP_010904698.1	.	NW_011550942.1:172754-176284	1376	0	0	0	0	0	0	0	0	0	0	0	0	0	0	0	0	0	0	0	0	0	0	0	0	0	0	0	0	0	0
XM_010906397	105032056	LOC105032056	L-aminoadipate-semialdehyde dehydrogenase-phosphopantetheinyl transferase, transcript variant X2	mRNA	XP_010904699.1	.	NW_011550942.1:172754-176284	1265	0	0	0	0	0	0	0	0	0	0	0	0	0	0	0	0	0	0	0	0	0	0	0	0	0	0	0	0	0	0
XM_019846172	105032056	LOC105032056	L-aminoadipate-semialdehyde dehydrogenase-phosphopantetheinyl transferase, transcript variant X3	mRNA	XP_019701731.1	.	NW_011550942.1:172754-176288	1247	0	0	0	0	0	0	0	0	0	0	0	0	0	0	0	0	0	0	0	0	0	0	0	0	0	0	0	0	0	0
XM_010906398	105032057	LOC105032057	SNF1-related protein kinase regulatory subunit beta-1, transcript variant X1	mRNA	XP_010904700.1	.	NW_011550942.1:194478-200067	1378	0	0	0	0	0	0	0	0	0	0	0	0	0	0	0	0	0	0	0	0	0	0	0	0	0	0	0	0	0	0
XM_029260888	105032057	LOC105032057	SNF1-related protein kinase regulatory subunit beta-1, transcript variant X2	mRNA	XP_029116721.1	.	NW_011550942.1:194780-200067	1190	0	0	0	0	0	0	0	0	0	0	0	0	0	0	0	0	0	0	0	0	0	0	0	0	0	0	0	0	0	0
XM_010906400	105032058	LOC105032058	protein LEO1 homolog, transcript variant X2	mRNA	XP_010904702.2	.	NW_011550942.1:202051-214798	2541	0	0	0	0	0	0	0	0	0	0	0	0	0	0	0	0	0	0	0	0	0	0	0	0	0	0	0	0	0	0
XM_010906401	105032058	LOC105032058	protein LEO1 homolog, transcript variant X3	mRNA	XP_010904703.2	.	NW_011550942.1:202051-214798	2523	0	0	0	0	0	0	0	0	0	0	0	0	0	0	0	0	0	0	0	0	0	0	0	0	0	0	0	0	0	0
XM_010906402	105032058	LOC105032058	protein LEO1 homolog, transcript variant X4	mRNA	XP_010904704.2	.	NW_011550942.1:202051-214798	2526	0	0	0	0	0	0	0	0	0	0	0	0	0	0	0	0	0	0	0	0	0	0	0	0	0	0	0	0	0	0
XM_010906399	105032058	LOC105032058	protein LEO1 homolog, transcript variant X1	mRNA	XP_010904701.2	.	NW_011550942.1:202177-214798	2412	0	0	0	0	0	0	0	0	0	0	0	0	0	0	0	0	0	0	0	0	0	0	0	0	0	0	0	0	0	0
XR_002163316	105032059	LOC105032059	uncharacterized LOC105032059, transcript variant X1	ncRNA	.	.	NW_011550942.1:240289-243430	474	0	0	0	0	0	0	0	0	0	0	0	0	0	0	0	0	0	0	0	0	0	0	0	0	0	0	0	0	0	0
XR_829726	105032059	LOC105032059	uncharacterized LOC105032059, transcript variant X2	ncRNA	.	.	NW_011550942.1:240386-244396	1237	0	0	0	0	0	0	0	0	0	0	0	0	0	0	0	0	0	0	0	0	0	0	0	0	0	0	0	0	0	0
XM_010906403	105032060	LOC105032060	calmodulin-7	mRNA	XP_010904705.1	.	NW_011550942.1:253686-259399	948	0	0	0	0	0	0	0	0	0	0	0	0	0	0	0	0	0	0	0	0	0	0	0	0	0	0	0	0	0	0
XR_003798660	105032061	LOC105032061	CBL-interacting protein kinase 32, transcript variant X1	misc_RNA	.	.	NW_011550942.1:312802-321177	1954	0	0	0	0	0	0	0	0	0	0	0	0	0	0	0	0	0	0	0	0	0	0	0	0	0	0	0	0	0	0
XR_002163318	105032061	LOC105032061	CBL-interacting protein kinase 32, transcript variant X4	misc_RNA	.	.	NW_011550942.1:312802-323275	2266	0	0	0	0	0	0	0	0	0	0	0	0	0	0	0	0	0	0	0	0	0	0	0	0	0	0	0	0	0	0
XR_003798661	105032061	LOC105032061	CBL-interacting protein kinase 32, transcript variant X3	misc_RNA	.	.	NW_011550942.1:312805-321177	1752	0	0	0	0	0	0	0	0	0	0	0	0	0	0	0	0	0	0	0	0	0	0	0	0	0	0	0	0	0	0
XR_003798662	105032061	LOC105032061	CBL-interacting protein kinase 32, transcript variant X5	misc_RNA	.	.	NW_011550942.1:312805-323275	2260	0	0	0	0	0	0	0	0	0	0	0	0	0	0	0	0	0	0	0	0	0	0	0	0	0	0	0	0	0	0
XM_029260889	105032061	LOC105032061	CBL-interacting protein kinase 32, transcript variant X2	mRNA	XP_029116722.1	.	NW_011550942.1:313225-321177	1661	0	0	0	0	0	0	0	0	0	0	0	0	0	0	0	0	0	0	0	0	0	0	0	0	0	0	0	0	0	0
XM_029260890	105032061	LOC105032061	CBL-interacting protein kinase 32, transcript variant X6	mRNA	XP_029116723.1	.	NW_011550942.1:316363-323275	1293	0	0	0	0	0	0	0	0	0	0	0	0	0	0	0	0	0	0	0	0	0	0	0	0	0	0	0	0	0	0
XM_019853286	105032062	LOC105032062	uncharacterized LOC105032062, transcript variant X3	mRNA	XP_019708845.1	.	chr1:60972735-60986261	2731	0	0	0	0	0	0	0	0	0	0	0	0	0	0	0	0	0	0	0	0	0	0	0	0	0	0	0	0	0	0
XM_029260806	105032062	LOC105032062	uncharacterized LOC105032062, transcript variant X4	mRNA	XP_029116639.1	.	chr1:60972735-60986262	2721	0	0	0	0	0	0	0	0	0	0	0	0	0	0	0	0	0	0	0	0	0	0	0	0	0	0	0	0	0	0
XM_029260803	105032062	LOC105032062	uncharacterized LOC105032062, transcript variant X1	mRNA	XP_029116636.1	.	chr1:60972735-60986269	2778	0	0	0	0	0	0	0	0	0	0	0	0	0	0	0	0	0	0	0	0	0	0	0	0	0	0	0	0	0	0
XM_029260804	105032062	LOC105032062	uncharacterized LOC105032062, transcript variant X2	mRNA	XP_029116637.1	.	chr1:60972735-60986269	2767	0	0	0	0	0	0	0	0	0	0	0	0	0	0	0	0	0	0	0	0	0	0	0	0	0	0	0	0	0	0
XM_019853287	105032062	LOC105032062	uncharacterized LOC105032062, transcript variant X6	mRNA	XP_019708846.1	.	chr1:60981793-60986259	2559	0	0	0	0	0	0	0	0	0	0	0	0	0	0	0	0	0	0	0	0	0	0	0	0	0	0	0	0	0	0
XM_029260809	105032062	LOC105032062	uncharacterized LOC105032062, transcript variant X5	mRNA	XP_029116642.1	.	chr1:60981793-60986269	2608	0	0	0	0	0	0	0	0	0	0	0	0	0	0	0	0	0	0	0	0	0	0	0	0	0	0	0	0	0	0
XR_003798614	105032062	LOC105032062	uncharacterized LOC105032062, transcript variant X7	misc_RNA	.	.	chr1:60981793-60986272	3372	0	0	0	0	0	0	0	0	0	0	0	0	0	0	0	0	0	0	0	0	0	0	0	0	0	0	0	0	0	0
XM_010906405	105032063	LOC105032063	COP9 signalosome complex subunit 2	mRNA	XP_010904707.1	.	NW_011550942.1:351115-360250	1851	0	0	0	0	0	0	0	0	0	0	0	0	0	0	0	0	0	0	0	0	0	0	0	0	0	0	0	0	0	0
XM_010906406	105032064	LOC105032064	uncharacterized LOC105032064	mRNA	XP_010904708.1	.	NW_011550942.1:369219-370815	898	0	0	0	0	0	0	0	0	0	0	0	0	0	0	0	0	0	0	0	0	0	0	0	0	0	0	0	0	0	0
XM_010906407	105032065	LOC105032065	uncharacterized LOC105032065	mRNA	XP_010904709.1	.	NW_011550942.1:380146-388575	3198	0	0	0	0	0	0	0	0	0	0	0	0	0	0	0	0	0	0	0	0	0	0	0	0	0	0	0	0	0	0
XM_010906409	105032066	LOC105032066	proteasome subunit alpha type-3, transcript variant X2	mRNA	XP_010904711.1	.	NW_011550942.1:404254-414876	1280	0	0	0	0	0	0	0	0	0	0	0	0	0	0	0	0	0	0	0	0	0	0	0	0	0	0	0	0	0	0
XM_010906408	105032066	LOC105032066	proteasome subunit alpha type-3, transcript variant X1	mRNA	XP_010904710.1	.	NW_011550942.1:404301-414876	1203	0	0	0	0	0	0	0	0	0	0	0	0	0	0	0	0	0	0	0	0	0	0	0	0	0	0	0	0	0	0
XM_010906410	105032067	LOC105032067	probable aquaporin SIP2-1, transcript variant X2	mRNA	XP_010904712.1	.	NW_011550942.1:415584-422900	1438	0	0	0	0	0	0	0	0	0	0	0	0	0	0	0	0	0	0	0	0	0	0	0	0	0	0	0	0	0	0
XM_029260891	105032067	LOC105032067	probable aquaporin SIP2-1, transcript variant X1	mRNA	XP_029116724.1	.	NW_011550942.1:415584-422914	1461	0	0	0	0	0	0	0	0	0	0	0	0	0	0	0	0	0	0	0	0	0	0	0	0	0	0	0	0	0	0
XM_029260892	105032067	LOC105032067	probable aquaporin SIP2-1, transcript variant X3	mRNA	XP_029116725.1	.	NW_011550942.1:415818-422925	1323	0	0	0	0	0	0	0	0	0	0	0	0	0	0	0	0	0	0	0	0	0	0	0	0	0	0	0	0	0	0
XM_010906411	105032068	LOC105032068	amino acid permease 8	mRNA	XP_010904713.1	.	NW_011550942.1:449445-455541	1792	0	0	0	0	0	0	0	0	0	0	0	0	0	0	0	0	0	0	0	0	0	0	0	0	0	0	0	0	0	0
XM_010906412	105032069	LOC105032069	probable protein S-acyltransferase 4	mRNA	XP_010904714.1	.	NW_011550942.1:493895-500289	1961	0	0	0	0	0	0	0	0	0	0	0	0	0	0	0	0	0	0	0	0	0	0	0	0	0	0	0	0	0	0
XM_010906415	105032070	LOC105032070	uncharacterized LOC105032070, transcript variant X2	mRNA	XP_010904717.1	.	NW_011550942.1:487477-492843	1177	0	0	0	0	0	0	0	0	0	0	0	0	0	0	0	0	0	0	0	0	0	0	0	0	0	0	0	0	0	0
XM_010906413	105032070	LOC105032070	uncharacterized LOC105032070, transcript variant X1	mRNA	XP_010904715.1	.	NW_011550942.1:487477-494589	1095	0	0	0	0	0	0	0	0	0	0	0	0	0	0	0	0	0	0	0	0	0	0	0	0	0	0	0	0	0	0
XM_010906418	105032071	LOC105032071	uncharacterized LOC105032071	mRNA	XP_010904720.1	.	chr1:60989317-60991878	2562	16	10	23	46	39	45	5	53	49	51	0.313638	0.191706	1.9693	3.54009	2.40643	0.88096	0.075164	4.32256	4.33733	0.971012	0.43365	0.268321	3.69064	6.11349	4.28676	1.08226	0.098789	8.51382	8.18006	1.22271
XM_010906416	105032072	LOC105032072	glutamine--fructose-6-phosphate aminotransferase [isomerizing] 2, transcript variant X1	mRNA	XP_010904718.1	.	NW_011550942.1:550496-569070	3129	0	0	0	0	0	0	0	0	0	0	0	0	0	0	0	0	0	0	0	0	0	0	0	0	0	0	0	0	0	0
XM_019846159	105032072	LOC105032072	glutamine--fructose-6-phosphate aminotransferase [isomerizing] 2, transcript variant X2	mRNA	XP_019701718.1	.	NW_011550942.1:553244-569070	2649	0	0	0	0	0	0	0	0	0	0	0	0	0	0	0	0	0	0	0	0	0	0	0	0	0	0	0	0	0	0
XR_829727	105032073	LOC105032073	uncharacterized LOC105032073	ncRNA	.	.	NW_011550942.1:549989-550640	541	0	0	0	0	0	0	0	0	0	0	0	0	0	0	0	0	0	0	0	0	0	0	0	0	0	0	0	0	0	0
XM_010906417	105032074	LOC105032074	alpha-L-arabinofuranosidase 1	mRNA	XP_010904719.1	.	NW_011550942.1:590240-611144	2381	0	0	0	0	0	0	0	0	0	0	0	0	0	0	0	0	0	0	0	0	0	0	0	0	0	0	0	0	0	0
XM_019846163	105032075	LOC105032075	uncharacterized LOC105032075, transcript variant X2	mRNA	XP_019701722.1	.	NW_011550942.1:628258-634518	988	0	0	0	0	0	0	0	0	0	0	0	0	0	0	0	0	0	0	0	0	0	0	0	0	0	0	0	0	0	0
XM_010906419	105032075	LOC105032075	uncharacterized LOC105032075, transcript variant X1	mRNA	XP_010904721.1	.	NW_011550942.1:628266-634518	986	0	0	0	0	0	0	0	0	0	0	0	0	0	0	0	0	0	0	0	0	0	0	0	0	0	0	0	0	0	0
XM_010906420	105032076	LOC105032076	probable arabinosyltransferase ARAD1, transcript variant X1	mRNA	XP_010904722.1	.	NW_011550942.1:635924-641888	2051	0	0	0	0	0	0	0	0	0	0	0	0	0	0	0	0	0	0	0	0	0	0	0	0	0	0	0	0	0	0
XM_010906422	105032076	LOC105032076	probable arabinosyltransferase ARAD1, transcript variant X2	mRNA	XP_010904724.1	.	NW_011550942.1:635924-641889	1914	0	0	0	0	0	0	0	0	0	0	0	0	0	0	0	0	0	0	0	0	0	0	0	0	0	0	0	0	0	0
XM_010906423	105032076	LOC105032076	probable arabinosyltransferase ARAD1, transcript variant X3	mRNA	XP_010904725.1	.	NW_011550942.1:635924-641892	1881	0	0	0	0	0	0	0	0	0	0	0	0	0	0	0	0	0	0	0	0	0	0	0	0	0	0	0	0	0	0
XM_010906424	105032077	LOC105032077	UDP-rhamnose/UDP-galactose transporter 6	mRNA	XP_010904726.1	.	NW_011550942.1:673659-680858	1800	0	0	0	0	0	0	0	0	0	0	0	0	0	0	0	0	0	0	0	0	0	0	0	0	0	0	0	0	0	0
XM_029260894	105032078	LOC105032078	transcription factor GAMYB, transcript variant X1	mRNA	XP_029116727.1	.	NW_011550942.1:707384-715968	2506	0	0	0	0	0	0	0	0	0	0	0	0	0	0	0	0	0	0	0	0	0	0	0	0	0	0	0	0	0	0
XM_010906429	105032078	LOC105032078	transcription factor GAMYB, transcript variant X4	mRNA	XP_010904731.1	.	NW_011550942.1:707385-715968	2424	0	0	0	0	0	0	0	0	0	0	0	0	0	0	0	0	0	0	0	0	0	0	0	0	0	0	0	0	0	0
XM_029260895	105032078	LOC105032078	transcription factor GAMYB, transcript variant X2	mRNA	XP_029116728.1	.	NW_011550942.1:707599-715968	2464	0	0	0	0	0	0	0	0	0	0	0	0	0	0	0	0	0	0	0	0	0	0	0	0	0	0	0	0	0	0
XM_029260897	105032078	LOC105032078	transcription factor GAMYB, transcript variant X3	mRNA	XP_029116730.1	.	NW_011550942.1:707599-715968	2479	0	0	0	0	0	0	0	0	0	0	0	0	0	0	0	0	0	0	0	0	0	0	0	0	0	0	0	0	0	0
XM_029260816	105032079	LOC105032079	disease resistance RPP13-like protein 4	mRNA	XP_029116649.1	.	chr1:60992096-60994874	2779	4	11	5	29	5	14	71	31	19	22	0.060381	0.187915	0.374842	2.06495	0.280436	0.245453	1.14633	2.31083	1.50952	0.377294	0.083485	0.263014	0.702488	3.56602	0.499563	0.301539	1.50662	4.55146	2.8469	0.475095
XM_010906430	105032080	LOC105032080	protein sym-1, transcript variant X1	mRNA	XP_010904732.1	.	NW_011550942.1:723046-732400	1564	0	0	0	0	0	0	0	0	0	0	0	0	0	0	0	0	0	0	0	0	0	0	0	0	0	0	0	0	0	0
XM_010906431	105032080	LOC105032080	protein sym-1, transcript variant X2	mRNA	XP_010904733.1	.	NW_011550942.1:723046-732907	1408	0	0	0	0	0	0	0	0	0	0	0	0	0	0	0	0	0	0	0	0	0	0	0	0	0	0	0	0	0	0
XM_019846170	105032080	LOC105032080	protein sym-1, transcript variant X3	mRNA	XP_019701729.1	.	NW_011550942.1:723046-733406	1469	0	0	0	0	0	0	0	0	0	0	0	0	0	0	0	0	0	0	0	0	0	0	0	0	0	0	0	0	0	0
XM_010906433	105032081	LOC105032081	calmodulin-binding protein 25-like	mRNA	XP_010904735.1	.	NW_011550942.1:745227-746212	986	0	0	0	0	0	0	0	0	0	0	0	0	0	0	0	0	0	0	0	0	0	0	0	0	0	0	0	0	0	0
XM_010906434	105032082	LOC105032082	sphinganine C4-monooxygenase 1	mRNA	XP_010904736.1	.	NW_011550942.1:755092-758785	1459	0	0	0	0	0	0	0	0	0	0	0	0	0	0	0	0	0	0	0	0	0	0	0	0	0	0	0	0	0	0
XM_010906436	105032083	LOC105032083	SUN domain-containing protein 1, transcript variant X2	mRNA	XP_010904738.1	.	NW_011550942.1:789333-800005	2304	0	0	0	0	0	0	0	0	0	0	0	0	0	0	0	0	0	0	0	0	0	0	0	0	0	0	0	0	0	0
XM_010906435	105032083	LOC105032083	SUN domain-containing protein 1, transcript variant X1	mRNA	XP_010904737.1	.	NW_011550942.1:789336-800005	2326	0	0	0	0	0	0	0	0	0	0	0	0	0	0	0	0	0	0	0	0	0	0	0	0	0	0	0	0	0	0
XR_829728	105032084	LOC105032084	uncharacterized LOC105032084	ncRNA	.	.	NW_011550942.1:826952-829890	623	0	0	0	0	0	0	0	0	0	0	0	0	0	0	0	0	0	0	0	0	0	0	0	0	0	0	0	0	0	0
XM_010906437	105032085	LOC105032085	NDR1/HIN1-like protein 13	mRNA	XP_010904739.1	.	NW_011550942.1:822456-824521	1677	0	0	0	0	0	0	0	0	0	0	0	0	0	0	0	0	0	0	0	0	0	0	0	0	0	0	0	0	0	0
XM_029260898	105032086	LOC105032086	uncharacterized LOC105032086, transcript variant X3	mRNA	XP_029116731.1	.	NW_011550942.1:805027-818531	4755	0	0	0	0	0	0	0	0	0	0	0	0	0	0	0	0	0	0	0	0	0	0	0	0	0	0	0	0	0	0
XM_010906438	105032086	LOC105032086	uncharacterized LOC105032086, transcript variant X1	mRNA	XP_010904740.1	.	NW_011550942.1:812232-818531	4920	0	0	0	0	0	0	0	0	0	0	0	0	0	0	0	0	0	0	0	0	0	0	0	0	0	0	0	0	0	0
XM_010906439	105032086	LOC105032086	uncharacterized LOC105032086, transcript variant X2	mRNA	XP_010904741.1	.	NW_011550942.1:812232-818531	4855	0	0	0	0	0	0	0	0	0	0	0	0	0	0	0	0	0	0	0	0	0	0	0	0	0	0	0	0	0	0
XM_010906443	105032087	LOC105032087	disease resistance protein RPS5	mRNA	XP_010904745.3	.	chr1:60998780-61001769	2990	1	4	2	11	2	2	7	0	2	9	0.004291	0.059565	0.146433	0.688068	0.08712	0.02881	0.095459	0	0.102731	0.142131	0.005933	0.08337	0.274428	1.18824	0.155193	0.035393	0.125462	0	0.193747	0.178973
XM_010906440	105032088	LOC105032088	F-box protein At4g18380	mRNA	XP_010904742.1	.	NW_011550942.1:857114-859361	1916	0	0	0	0	0	0	0	0	0	0	0	0	0	0	0	0	0	0	0	0	0	0	0	0	0	0	0	0	0	0
XM_010906441	105032089	LOC105032089	uncharacterized LOC105032089	mRNA	XP_010904743.1	.	NW_011550942.1:938981-947073	2680	0	0	0	0	0	0	0	0	0	0	0	0	0	0	0	0	0	0	0	0	0	0	0	0	0	0	0	0	0	0
XM_019846156	105032090	LOC105032090	histone H3.2, transcript variant X4	mRNA	XP_019701715.1	.	NW_011550942.1:936315-939316	663	0	0	0	0	0	0	0	0	0	0	0	0	0	0	0	0	0	0	0	0	0	0	0	0	0	0	0	0	0	0
XR_003798664	105032090	LOC105032090	histone H3.2, transcript variant X5	misc_RNA	.	.	NW_011550942.1:936315-939984	543	0	0	0	0	0	0	0	0	0	0	0	0	0	0	0	0	0	0	0	0	0	0	0	0	0	0	0	0	0	0
XM_010906442	105032090	LOC105032090	histone H3.2, transcript variant X3	mRNA	XP_010904744.1	.	NW_011550942.1:936315-940612	759	0	0	0	0	0	0	0	0	0	0	0	0	0	0	0	0	0	0	0	0	0	0	0	0	0	0	0	0	0	0
XM_019846155	105032090	LOC105032090	histone H3.2, transcript variant X2	mRNA	XP_019701714.1	.	NW_011550942.1:936315-940612	771	0	0	0	0	0	0	0	0	0	0	0	0	0	0	0	0	0	0	0	0	0	0	0	0	0	0	0	0	0	0
XM_019846154	105032090	LOC105032090	histone H3.2, transcript variant X1	mRNA	XP_019701713.1	.	NW_011550942.1:936315-940613	871	0	0	0	0	0	0	0	0	0	0	0	0	0	0	0	0	0	0	0	0	0	0	0	0	0	0	0	0	0	0
XM_019846160	105032091	LOC105032091	uncharacterized LOC105032091	mRNA	XP_019701719.1	.	NW_011550942.1:978204-980575	966	0	0	0	0	0	0	0	0	0	0	0	0	0	0	0	0	0	0	0	0	0	0	0	0	0	0	0	0	0	0
XM_010906445	105032092	LOC105032092	60S ribosomal protein L30	mRNA	XP_010904747.1	.	NW_011550942.1:989802-995252	702	0	0	0	0	0	0	0	0	0	0	0	0	0	0	0	0	0	0	0	0	0	0	0	0	0	0	0	0	0	0
gene-LOC105032093	105032093	LOC105032093	.	Gene	.	.	NW_011550942.1:215466-216462	997	0	0	0	0	0	0	0	0	0	0	0	0	0	0	0	0	0	0	0	0	0	0	0	0	0	0	0	0	0	0
gene-LOC105032094	105032094	LOC105032094	.	Gene	.	.	NW_011550942.1:460767-483038	1539	0	0	0	0	0	0	0	0	0	0	0	0	0	0	0	0	0	0	0	0	0	0	0	0	0	0	0	0	0	0
XM_010906446	105032095	LOC105032095	NAC domain-containing protein 2-like	mRNA	XP_010904748.1	.	NW_011550942.1:681382-686227	507	0	0	0	0	0	0	0	0	0	0	0	0	0	0	0	0	0	0	0	0	0	0	0	0	0	0	0	0	0	0
XM_029260886	105032096	LOC105032096	uncharacterized LOC105032096	mRNA	XP_029116719.1	.	NW_011550942.1:802702-806045	2493	0	0	0	0	0	0	0	0	0	0	0	0	0	0	0	0	0	0	0	0	0	0	0	0	0	0	0	0	0	0
XM_029260817	105032097	LOC105032097	probable disease resistance protein At5g45490	mRNA	XP_029116650.1	.	chr1:60996576-60998212	1637	32	41	38	71	68	68	167	88	68	147	0.967906	1.3026	5.01711	8.67588	6.65591	2.06405	4.57561	11.1618	9.35168	4.44248	1.33827	1.82318	9.40251	14.9826	11.8567	2.53568	6.01373	21.9845	17.6369	5.59404
XM_019846164	105032099	LOC105032099	protein KRI1 homolog	mRNA	XP_019701723.2	.	NW_011550942.1:969089-970238	1150	0	0	0	0	0	0	0	0	0	0	0	0	0	0	0	0	0	0	0	0	0	0	0	0	0	0	0	0	0	0
XM_010906449	105032100	LOC105032100	protein NETWORKED 3A, transcript variant X2	mRNA	XP_010904751.1	.	NW_011550943.1:55846-63208	1037	0	0	0	0	0	0	0	0	0	0	0	0	0	0	0	0	0	0	0	0	0	0	0	0	0	0	0	0	0	0
XM_010906450	105032100	LOC105032100	protein NETWORKED 3A, transcript variant X1	mRNA	XP_010904752.1	.	NW_011550943.1:55846-63208	1046	0	0	0	0	0	0	0	0	0	0	0	0	0	0	0	0	0	0	0	0	0	0	0	0	0	0	0	0	0	0
XM_010906451	105032101	LOC105032101	acyl carrier protein 2, chloroplastic	mRNA	XP_010904753.1	.	NW_011550943.1:75017-81245	842	0	0	0	0	0	0	0	0	0	0	0	0	0	0	0	0	0	0	0	0	0	0	0	0	0	0	0	0	0	0
XM_010906452	105032102	LOC105032102	pentatricopeptide repeat-containing protein At4g21065	mRNA	XP_010904754.2	.	NW_011550943.1:95917-98602	2686	0	0	0	0	0	0	0	0	0	0	0	0	0	0	0	0	0	0	0	0	0	0	0	0	0	0	0	0	0	0
XM_029260900	105032103	LOC105032103	sodium/hydrogen exchanger 2, transcript variant X2	mRNA	XP_029116733.1	.	NW_011550943.1:101452-110271	1908	0	0	0	0	0	0	0	0	0	0	0	0	0	0	0	0	0	0	0	0	0	0	0	0	0	0	0	0	0	0
XM_010906453	105032103	LOC105032103	sodium/hydrogen exchanger 2, transcript variant X1	mRNA	XP_010904755.1	.	NW_011550943.1:99086-110271	2471	0	0	0	0	0	0	0	0	0	0	0	0	0	0	0	0	0	0	0	0	0	0	0	0	0	0	0	0	0	0
XM_029260901	105032104	LOC105032104	uncharacterized LOC105032104, transcript variant X3	mRNA	XP_029116734.1	.	NW_011550943.1:120928-160482	2039	0	0	0	0	0	0	0	0	0	0	0	0	0	0	0	0	0	0	0	0	0	0	0	0	0	0	0	0	0	0
XM_010906454	105032104	LOC105032104	uncharacterized LOC105032104, transcript variant X1	mRNA	XP_010904756.1	.	NW_011550943.1:120930-160482	2097	0	0	0	0	0	0	0	0	0	0	0	0	0	0	0	0	0	0	0	0	0	0	0	0	0	0	0	0	0	0
XM_010906455	105032104	LOC105032104	uncharacterized LOC105032104, transcript variant X2	mRNA	XP_010904757.1	.	NW_011550943.1:120931-160482	2090	0	0	0	0	0	0	0	0	0	0	0	0	0	0	0	0	0	0	0	0	0	0	0	0	0	0	0	0	0	0
XM_029260822	105032105	LOC105032105	uncharacterized LOC105032105	mRNA	XP_029116655.1	.	chr1:61023935-61029486	2237	0	0	0	0	0	0	0	0	0	0	0	0	0	0	0	0	0	0	0	0	0	0	0	0	0	0	0	0	0	0
XM_029260902	105032106	LOC105032106	FACT complex subunit SPT16, transcript variant X5	mRNA	XP_029116735.1	.	NW_011550943.1:176569-181713	4115	0	0	0	0	0	0	0	0	0	0	0	0	0	0	0	0	0	0	0	0	0	0	0	0	0	0	0	0	0	0
XR_003798674	105032106	LOC105032106	FACT complex subunit SPT16, transcript variant X4	misc_RNA	.	.	NW_011550943.1:176569-185859	4162	0	0	0	0	0	0	0	0	0	0	0	0	0	0	0	0	0	0	0	0	0	0	0	0	0	0	0	0	0	0
XR_003798671	105032106	LOC105032106	FACT complex subunit SPT16, transcript variant X1	misc_RNA	.	.	NW_011550943.1:176569-186689	4498	0	0	0	0	0	0	0	0	0	0	0	0	0	0	0	0	0	0	0	0	0	0	0	0	0	0	0	0	0	0
XR_003798672	105032106	LOC105032106	FACT complex subunit SPT16, transcript variant X2	misc_RNA	.	.	NW_011550943.1:176569-186689	4196	0	0	0	0	0	0	0	0	0	0	0	0	0	0	0	0	0	0	0	0	0	0	0	0	0	0	0	0	0	0
XR_003798673	105032106	LOC105032106	FACT complex subunit SPT16, transcript variant X3	misc_RNA	.	.	NW_011550943.1:176569-186689	4495	0	0	0	0	0	0	0	0	0	0	0	0	0	0	0	0	0	0	0	0	0	0	0	0	0	0	0	0	0	0
XM_029260903	105032107	LOC105032107	transport inhibitor response 1-like protein Os05g0150500, transcript variant X1	mRNA	XP_029116736.1	.	NW_011550943.1:196011-200665	2253	0	0	0	0	0	0	0	0	0	0	0	0	0	0	0	0	0	0	0	0	0	0	0	0	0	0	0	0	0	0
XM_010906461	105032107	LOC105032107	transport inhibitor response 1-like protein Os05g0150500, transcript variant X3	mRNA	XP_010904763.1	.	NW_011550943.1:196011-201029	2517	0	0	0	0	0	0	0	0	0	0	0	0	0	0	0	0	0	0	0	0	0	0	0	0	0	0	0	0	0	0
XM_010906460	105032107	LOC105032107	transport inhibitor response 1-like protein Os05g0150500, transcript variant X2	mRNA	XP_010904762.1	.	NW_011550943.1:196011-201058	2222	0	0	0	0	0	0	0	0	0	0	0	0	0	0	0	0	0	0	0	0	0	0	0	0	0	0	0	0	0	0
XM_019846203	105032109	LOC105032109	protein HASTY 1, transcript variant X2	mRNA	XP_019701762.1	.	NW_011550943.1:205167-227657	4032	0	0	0	0	0	0	0	0	0	0	0	0	0	0	0	0	0	0	0	0	0	0	0	0	0	0	0	0	0	0
XM_010906462	105032109	LOC105032109	protein HASTY 1, transcript variant X1	mRNA	XP_010904764.1	.	NW_011550943.1:205167-227979	4245	0	0	0	0	0	0	0	0	0	0	0	0	0	0	0	0	0	0	0	0	0	0	0	0	0	0	0	0	0	0
XM_010906463	105032110	LOC105032110	kinesin-like protein KIN-14O, transcript variant X1	mRNA	XP_010904765.1	.	NW_011550943.1:243860-247718	2758	0	0	0	0	0	0	0	0	0	0	0	0	0	0	0	0	0	0	0	0	0	0	0	0	0	0	0	0	0	0
XM_010906464	105032110	LOC105032110	kinesin-like protein KIN-14O, transcript variant X2	mRNA	XP_010904766.1	.	NW_011550943.1:243860-247719	2756	0	0	0	0	0	0	0	0	0	0	0	0	0	0	0	0	0	0	0	0	0	0	0	0	0	0	0	0	0	0
XM_029260834	105032111	LOC105032111	uncharacterized LOC105032111, transcript variant X3	mRNA	XP_029116667.1	.	chr1:61042093-61062023	2727	0	0	1	0	0	0	0	2	5	0	0	0	0.028935	0	0	0	0	0.130205	0.349432	0	0	0	0.054227	0	0	0	0	0.256455	0.659016	0
XM_029260839	105032111	LOC105032111	uncharacterized LOC105032111, transcript variant X5	mRNA	XP_029116672.1	.	chr1:61042094-61054912	1446	0	0	0	0	0	0	0	0	0	0	0	0	0	0	0	0	0	0	0	0	0	0	0	0	0	0	0	0	0	0
XM_029260826	105032111	LOC105032111	uncharacterized LOC105032111, transcript variant X1	mRNA	XP_029116659.1	.	chr1:61042094-61062023	2789	0	0	14	0	0	0	0	2	6	9	0	0	1.08694	0	0	0	0	0.117969	0.485432	0.158894	0	0	2.03703	0	0	0	0	0.232355	0.915508	0.200082
XM_029260836	105032111	LOC105032111	uncharacterized LOC105032111, transcript variant X4	mRNA	XP_029116669.1	.	chr1:61042095-61054912	1508	0	0	0	0	0	0	0	0	0	0	0	0	0	0	0	0	0	0	0	0	0	0	0	0	0	0	0	0	0	0
XM_019851446	105032111	LOC105032111	uncharacterized LOC105032111, transcript variant X2	mRNA	XP_019707005.2	.	chr1:61045658-61062023	2549	0	0	1	0	0	0	0	0	0	0	0	0	0.027658	0	0	0	0	0	0	0	0	0	0.051834	0	0	0	0	0	0	0
XM_010906465	105032112	LOC105032112	CASP-like protein 1E1	mRNA	XP_010904767.1	.	NW_011550943.1:255148-259484	785	0	0	0	0	0	0	0	0	0	0	0	0	0	0	0	0	0	0	0	0	0	0	0	0	0	0	0	0	0	0
XR_003798677	105032113	LOC105032113	uncharacterized LOC105032113	misc_RNA	.	.	NW_011550943.1:286166-289281	1146	0	0	0	0	0	0	0	0	0	0	0	0	0	0	0	0	0	0	0	0	0	0	0	0	0	0	0	0	0	0
XM_010906467	105032114	LOC105032114	CASP-like protein 1E1, transcript variant X1	mRNA	XP_010904769.1	.	NW_011550943.1:268896-270677	804	0	0	0	0	0	0	0	0	0	0	0	0	0	0	0	0	0	0	0	0	0	0	0	0	0	0	0	0	0	0
XM_029260904	105032114	LOC105032114	CASP-like protein 1E1, transcript variant X2	mRNA	XP_029116737.1	.	NW_011550943.1:268899-285074	874	0	0	0	0	0	0	0	0	0	0	0	0	0	0	0	0	0	0	0	0	0	0	0	0	0	0	0	0	0	0
XM_010906468	105032115	LOC105032115	CASP-like protein 1E1	mRNA	XP_010904770.1	.	NW_011550943.1:264169-267203	879	0	0	0	0	0	0	0	0	0	0	0	0	0	0	0	0	0	0	0	0	0	0	0	0	0	0	0	0	0	0
XM_010906469	105032116	LOC105032116	CASP-like protein 1D1	mRNA	XP_010904771.1	.	NW_011550943.1:298326-300103	940	0	0	0	0	0	0	0	0	0	0	0	0	0	0	0	0	0	0	0	0	0	0	0	0	0	0	0	0	0	0
XM_010906470	105032117	LOC105032117	CASP-like protein 1D1	mRNA	XP_010904772.1	.	NW_011550943.1:307066-309916	848	0	0	0	0	0	0	0	0	0	0	0	0	0	0	0	0	0	0	0	0	0	0	0	0	0	0	0	0	0	0
XM_010906471	105032118	LOC105032118	acyltransferase-like protein At1g54570, chloroplastic	mRNA	XP_010904773.1	.	NW_011550943.1:323354-343745	3086	0	0	0	0	0	0	0	0	0	0	0	0	0	0	0	0	0	0	0	0	0	0	0	0	0	0	0	0	0	0
XM_019846181	105032120	LOC105032120	acyltransferase-like protein At1g54570, chloroplastic	mRNA	XP_019701740.1	.	NW_011550943.1:389194-412234	4024	0	0	0	0	0	0	0	0	0	0	0	0	0	0	0	0	0	0	0	0	0	0	0	0	0	0	0	0	0	0
XM_010906478	105032121	LOC105032121	uncharacterized GPI-anchored protein At4g28100	mRNA	XP_010904780.1	.	chr1:61067737-61070627	1559	0	0	10	14	28	4	0	0	8	0	0	0	1.33635	1.75414	2.82132	0.097015	0	0	1.14644	0	0	0	2.50444	3.02927	5.02583	0.119183	0	0	2.16214	0
XM_010906475	105032122	LOC105032122	thyroid transcription factor 1-associated protein 26, transcript variant X1	mRNA	XP_010904777.1	.	NW_011550943.1:412911-425462	825	0	0	0	0	0	0	0	0	0	0	0	0	0	0	0	0	0	0	0	0	0	0	0	0	0	0	0	0	0	0
XM_010906476	105032122	LOC105032122	thyroid transcription factor 1-associated protein 26, transcript variant X2	mRNA	XP_010904778.1	.	NW_011550943.1:412923-425462	810	0	0	0	0	0	0	0	0	0	0	0	0	0	0	0	0	0	0	0	0	0	0	0	0	0	0	0	0	0	0
XM_019846191	105032123	LOC105032123	double-stranded RNA-binding protein 2	mRNA	XP_019701750.1	.	NW_011550943.1:429303-445024	2197	0	0	0	0	0	0	0	0	0	0	0	0	0	0	0	0	0	0	0	0	0	0	0	0	0	0	0	0	0	0
XM_010906479	105032124	LOC105032124	probable nucleolar protein 5-2	mRNA	XP_010904781.1	.	NW_011550943.1:448527-459899	2366	0	0	0	0	0	0	0	0	0	0	0	0	0	0	0	0	0	0	0	0	0	0	0	0	0	0	0	0	0	0
XM_010906480	105032125	LOC105032125	uncharacterized LOC105032125, transcript variant X1	mRNA	XP_010904782.1	.	NW_011550943.1:513411-527269	1414	0	0	0	0	0	0	0	0	0	0	0	0	0	0	0	0	0	0	0	0	0	0	0	0	0	0	0	0	0	0
XM_019846187	105032125	LOC105032125	uncharacterized LOC105032125, transcript variant X3	mRNA	XP_019701746.1	.	NW_011550943.1:513411-527269	1315	0	0	0	0	0	0	0	0	0	0	0	0	0	0	0	0	0	0	0	0	0	0	0	0	0	0	0	0	0	0
XM_029260906	105032125	LOC105032125	uncharacterized LOC105032125, transcript variant X2	mRNA	XP_029116739.1	.	NW_011550943.1:513411-527269	1390	0	0	0	0	0	0	0	0	0	0	0	0	0	0	0	0	0	0	0	0	0	0	0	0	0	0	0	0	0	0
gene-LOC105032126	105032126	LOC105032126	.	Gene	.	.	NW_011550943.1:530667-543784	2292	0	0	0	0	0	0	0	0	0	0	0	0	0	0	0	0	0	0	0	0	0	0	0	0	0	0	0	0	0	0
XM_029260908	105032127	LOC105032127	uncharacterized LOC105032127, transcript variant X1	mRNA	XP_029116741.1	.	NW_011550943.1:568234-625348	1045	0	0	0	0	0	0	0	0	0	0	0	0	0	0	0	0	0	0	0	0	0	0	0	0	0	0	0	0	0	0
XR_003798683	105032127	LOC105032127	uncharacterized LOC105032127, transcript variant X14	misc_RNA	.	.	NW_011550943.1:568248-625348	1169	0	0	0	0	0	0	0	0	0	0	0	0	0	0	0	0	0	0	0	0	0	0	0	0	0	0	0	0	0	0
XR_003798678	105032127	LOC105032127	uncharacterized LOC105032127, transcript variant X4	misc_RNA	.	.	NW_011550943.1:568256-625348	1688	0	0	0	0	0	0	0	0	0	0	0	0	0	0	0	0	0	0	0	0	0	0	0	0	0	0	0	0	0	0
XR_003798679	105032127	LOC105032127	uncharacterized LOC105032127, transcript variant X5	misc_RNA	.	.	NW_011550943.1:568260-625348	1485	0	0	0	0	0	0	0	0	0	0	0	0	0	0	0	0	0	0	0	0	0	0	0	0	0	0	0	0	0	0
XM_019846190	105032127	LOC105032127	uncharacterized LOC105032127, transcript variant X2	mRNA	XP_019701749.1	.	NW_011550943.1:595653-625348	1334	0	0	0	0	0	0	0	0	0	0	0	0	0	0	0	0	0	0	0	0	0	0	0	0	0	0	0	0	0	0
XR_002163322	105032127	LOC105032127	uncharacterized LOC105032127, transcript variant X3	misc_RNA	.	.	NW_011550943.1:595653-625348	1325	0	0	0	0	0	0	0	0	0	0	0	0	0	0	0	0	0	0	0	0	0	0	0	0	0	0	0	0	0	0
XR_002163324	105032127	LOC105032127	uncharacterized LOC105032127, transcript variant X8	misc_RNA	.	.	NW_011550943.1:595653-625348	1334	0	0	0	0	0	0	0	0	0	0	0	0	0	0	0	0	0	0	0	0	0	0	0	0	0	0	0	0	0	0
XR_003798680	105032127	LOC105032127	uncharacterized LOC105032127, transcript variant X10	misc_RNA	.	.	NW_011550943.1:595653-625348	1322	0	0	0	0	0	0	0	0	0	0	0	0	0	0	0	0	0	0	0	0	0	0	0	0	0	0	0	0	0	0
XR_003798681	105032127	LOC105032127	uncharacterized LOC105032127, transcript variant X11	misc_RNA	.	.	NW_011550943.1:595653-625348	1126	0	0	0	0	0	0	0	0	0	0	0	0	0	0	0	0	0	0	0	0	0	0	0	0	0	0	0	0	0	0
XR_003798682	105032127	LOC105032127	uncharacterized LOC105032127, transcript variant X13	misc_RNA	.	.	NW_011550943.1:595653-625348	1114	0	0	0	0	0	0	0	0	0	0	0	0	0	0	0	0	0	0	0	0	0	0	0	0	0	0	0	0	0	0
XR_829738	105032127	LOC105032127	uncharacterized LOC105032127, transcript variant X6	misc_RNA	.	.	NW_011550943.1:595653-625348	1117	0	0	0	0	0	0	0	0	0	0	0	0	0	0	0	0	0	0	0	0	0	0	0	0	0	0	0	0	0	0
XR_829741	105032127	LOC105032127	uncharacterized LOC105032127, transcript variant X9	misc_RNA	.	.	NW_011550943.1:595653-625348	1120	0	0	0	0	0	0	0	0	0	0	0	0	0	0	0	0	0	0	0	0	0	0	0	0	0	0	0	0	0	0
XR_829744	105032127	LOC105032127	uncharacterized LOC105032127, transcript variant X12	misc_RNA	.	.	NW_011550943.1:595653-625348	1129	0	0	0	0	0	0	0	0	0	0	0	0	0	0	0	0	0	0	0	0	0	0	0	0	0	0	0	0	0	0
XR_829746	105032127	LOC105032127	uncharacterized LOC105032127, transcript variant X7	misc_RNA	.	.	NW_011550943.1:595653-625348	1344	0	0	0	0	0	0	0	0	0	0	0	0	0	0	0	0	0	0	0	0	0	0	0	0	0	0	0	0	0	0
XR_829748	105032128	LOC105032128	uncharacterized LOC105032128	ncRNA	.	.	chr1:61072882-61073488	449	0	0	0	0	0	0	0	0	0	0	0	0	0	0	0	0	0	0	0	0	0	0	0	0	0	0	0	0	0	0
XM_019846175	105032129	LOC105032129	uncharacterized LOC105032129, transcript variant X1	mRNA	XP_019701734.1	.	NW_011550943.1:645491-646839	1262	0	0	0	0	0	0	0	0	0	0	0	0	0	0	0	0	0	0	0	0	0	0	0	0	0	0	0	0	0	0
XR_829747	105032129	LOC105032129	uncharacterized LOC105032129, transcript variant X2	misc_RNA	.	.	NW_011550943.1:645491-646839	1162	0	0	0	0	0	0	0	0	0	0	0	0	0	0	0	0	0	0	0	0	0	0	0	0	0	0	0	0	0	0
XM_029260910	105032131	LOC105032131	serine/threonine-protein kinase PBL27, transcript variant X2	mRNA	XP_029116743.1	.	NW_011550943.1:648325-652639	1838	0	0	0	0	0	0	0	0	0	0	0	0	0	0	0	0	0	0	0	0	0	0	0	0	0	0	0	0	0	0
XM_010906484	105032131	LOC105032131	serine/threonine-protein kinase PBL27, transcript variant X1	mRNA	XP_010904786.1	.	NW_011550943.1:648325-653012	2222	0	0	0	0	0	0	0	0	0	0	0	0	0	0	0	0	0	0	0	0	0	0	0	0	0	0	0	0	0	0
XM_010906485	105032132	LOC105032132	putative glutaredoxin-C14	mRNA	XP_010904787.1	.	NW_011550943.1:664914-665789	793	0	0	0	0	0	0	0	0	0	0	0	0	0	0	0	0	0	0	0	0	0	0	0	0	0	0	0	0	0	0
XM_010906486	105032133	LOC105032133	glutaredoxin-C1-like	mRNA	XP_010904788.1	.	NW_011550943.1:722488-723146	659	0	0	0	0	0	0	0	0	0	0	0	0	0	0	0	0	0	0	0	0	0	0	0	0	0	0	0	0	0	0
XM_010906491	105032134	LOC105032134	uncharacterized aarF domain-containing protein kinase 2	mRNA	XP_010904793.1	.	chr1:61078748-61088866	2368	65	85	189	163	118	107	98	438	444	114	1.39911	1.85417	17.7015	13.7581	7.99152	2.26708	1.85314	38.7349	42.6079	2.36223	1.93447	2.59519	33.1742	23.7592	14.2359	2.7851	2.43559	76.2932	80.357	2.97455
XM_010906487	105032135	LOC105032135	acyl-CoA-binding domain-containing protein 6, transcript variant X3	mRNA	XP_010904789.1	.	NW_011550943.1:725624-748087	2868	0	0	0	0	0	0	0	0	0	0	0	0	0	0	0	0	0	0	0	0	0	0	0	0	0	0	0	0	0	0
XM_010906488	105032135	LOC105032135	acyl-CoA-binding domain-containing protein 6, transcript variant X4	mRNA	XP_010904790.1	.	NW_011550943.1:725624-748087	2859	0	0	0	0	0	0	0	0	0	0	0	0	0	0	0	0	0	0	0	0	0	0	0	0	0	0	0	0	0	0
XM_029260911	105032135	LOC105032135	acyl-CoA-binding domain-containing protein 6, transcript variant X1	mRNA	XP_029116744.1	.	NW_011550943.1:725624-748087	2895	0	0	0	0	0	0	0	0	0	0	0	0	0	0	0	0	0	0	0	0	0	0	0	0	0	0	0	0	0	0
XM_029260912	105032135	LOC105032135	acyl-CoA-binding domain-containing protein 6, transcript variant X2	mRNA	XP_029116745.1	.	NW_011550943.1:725624-748087	2886	0	0	0	0	0	0	0	0	0	0	0	0	0	0	0	0	0	0	0	0	0	0	0	0	0	0	0	0	0	0
XM_029260913	105032135	LOC105032135	acyl-CoA-binding domain-containing protein 6, transcript variant X5	mRNA	XP_029116746.1	.	NW_011550943.1:725624-748087	2911	0	0	0	0	0	0	0	0	0	0	0	0	0	0	0	0	0	0	0	0	0	0	0	0	0	0	0	0	0	0
XR_003798684	105032136	LOC105032136	protein YIPF5 homolog, transcript variant X2	misc_RNA	.	.	NW_011550943.1:747583-754722	1324	0	0	0	0	0	0	0	0	0	0	0	0	0	0	0	0	0	0	0	0	0	0	0	0	0	0	0	0	0	0
XM_010906493	105032136	LOC105032136	protein YIPF5 homolog, transcript variant X3	mRNA	XP_010904795.1	.	NW_011550943.1:748468-754722	1022	0	0	0	0	0	0	0	0	0	0	0	0	0	0	0	0	0	0	0	0	0	0	0	0	0	0	0	0	0	0
XM_010906492	105032136	LOC105032136	protein YIPF5 homolog, transcript variant X1	mRNA	XP_010904794.1	.	NW_011550943.1:748845-754722	1334	0	0	0	0	0	0	0	0	0	0	0	0	0	0	0	0	0	0	0	0	0	0	0	0	0	0	0	0	0	0
XM_029260915	105032136	LOC105032136	protein YIPF5 homolog, transcript variant X4	mRNA	XP_029116748.1	.	NW_011550943.1:749211-754722	4691	0	0	0	0	0	0	0	0	0	0	0	0	0	0	0	0	0	0	0	0	0	0	0	0	0	0	0	0	0	0
XM_010906494	105032137	LOC105032137	DNA (cytosine-5)-methyltransferase DRM2, transcript variant X1	mRNA	XP_010904796.1	.	NW_011550943.1:764881-780281	2527	0	0	0	0	0	0	0	0	0	0	0	0	0	0	0	0	0	0	0	0	0	0	0	0	0	0	0	0	0	0
XM_010906495	105032137	LOC105032137	DNA (cytosine-5)-methyltransferase DRM2, transcript variant X2	mRNA	XP_010904797.1	.	NW_011550943.1:764881-780361	2512	0	0	0	0	0	0	0	0	0	0	0	0	0	0	0	0	0	0	0	0	0	0	0	0	0	0	0	0	0	0
XM_029260916	105032138	LOC105032138	pentatricopeptide repeat-containing protein At5g12100, mitochondrial-like	mRNA	XP_029116749.1	.	NW_011550943.1:791172-799264	3854	0	0	0	0	0	0	0	0	0	0	0	0	0	0	0	0	0	0	0	0	0	0	0	0	0	0	0	0	0	0
XM_010906499	105032140	LOC105032140	sucrose nonfermenting 4-like protein, transcript variant X2	mRNA	XP_010904801.1	.	NW_011550943.1:803183-823641	2884	0	0	0	0	0	0	0	0	0	0	0	0	0	0	0	0	0	0	0	0	0	0	0	0	0	0	0	0	0	0
XM_010906498	105032140	LOC105032140	sucrose nonfermenting 4-like protein, transcript variant X1	mRNA	XP_010904800.1	.	NW_011550943.1:803183-823655	2804	0	0	0	0	0	0	0	0	0	0	0	0	0	0	0	0	0	0	0	0	0	0	0	0	0	0	0	0	0	0
XM_010906503	105032141	LOC105032141	transcription factor MYB102	mRNA	XP_010904805.1	.	chr1:61127210-61129011	1458	0	0	18	13	0	0	0	2	13	0	0	0	2.63918	1.74837	0	0	0	0.287417	1.99111	0	0	0	4.94605	3.01931	0	0	0	0.566103	3.75516	0
XM_029260917	105032142	LOC105032142	uncharacterized LOC105032142, transcript variant X1	mRNA	XP_029116750.1	.	NW_011550943.1:867943-878918	3315	0	0	0	0	0	0	0	0	0	0	0	0	0	0	0	0	0	0	0	0	0	0	0	0	0	0	0	0	0	0
XM_029260920	105032142	LOC105032142	uncharacterized LOC105032142, transcript variant X5	mRNA	XP_029116753.1	.	NW_011550943.1:867943-878918	3328	0	0	0	0	0	0	0	0	0	0	0	0	0	0	0	0	0	0	0	0	0	0	0	0	0	0	0	0	0	0
XM_029260921	105032142	LOC105032142	uncharacterized LOC105032142, transcript variant X6	mRNA	XP_029116754.1	.	NW_011550943.1:867943-878918	3243	0	0	0	0	0	0	0	0	0	0	0	0	0	0	0	0	0	0	0	0	0	0	0	0	0	0	0	0	0	0
XM_029260922	105032142	LOC105032142	uncharacterized LOC105032142, transcript variant X7	mRNA	XP_029116755.1	.	NW_011550943.1:867943-878918	3283	0	0	0	0	0	0	0	0	0	0	0	0	0	0	0	0	0	0	0	0	0	0	0	0	0	0	0	0	0	0
XM_029260923	105032142	LOC105032142	uncharacterized LOC105032142, transcript variant X10	mRNA	XP_029116756.1	.	NW_011550943.1:867943-878918	3234	0	0	0	0	0	0	0	0	0	0	0	0	0	0	0	0	0	0	0	0	0	0	0	0	0	0	0	0	0	0
XM_010906502	105032142	LOC105032142	uncharacterized LOC105032142, transcript variant X2	mRNA	XP_010904804.1	.	NW_011550943.1:868130-878918	3295	0	0	0	0	0	0	0	0	0	0	0	0	0	0	0	0	0	0	0	0	0	0	0	0	0	0	0	0	0	0
XM_019846195	105032142	LOC105032142	uncharacterized LOC105032142, transcript variant X11	mRNA	XP_019701754.1	.	NW_011550943.1:868130-878918	3146	0	0	0	0	0	0	0	0	0	0	0	0	0	0	0	0	0	0	0	0	0	0	0	0	0	0	0	0	0	0
XM_019846198	105032142	LOC105032142	uncharacterized LOC105032142, transcript variant X8	mRNA	XP_019701757.1	.	NW_011550943.1:868130-878918	3218	0	0	0	0	0	0	0	0	0	0	0	0	0	0	0	0	0	0	0	0	0	0	0	0	0	0	0	0	0	0
XM_019846199	105032142	LOC105032142	uncharacterized LOC105032142, transcript variant X9	mRNA	XP_019701758.1	.	NW_011550943.1:868130-878918	3214	0	0	0	0	0	0	0	0	0	0	0	0	0	0	0	0	0	0	0	0	0	0	0	0	0	0	0	0	0	0
XM_019846200	105032142	LOC105032142	uncharacterized LOC105032142, transcript variant X12	mRNA	XP_019701759.1	.	NW_011550943.1:868130-878918	3142	0	0	0	0	0	0	0	0	0	0	0	0	0	0	0	0	0	0	0	0	0	0	0	0	0	0	0	0	0	0
XM_029260919	105032142	LOC105032142	uncharacterized LOC105032142, transcript variant X4	mRNA	XP_029116752.1	.	NW_011550943.1:868130-878918	3291	0	0	0	0	0	0	0	0	0	0	0	0	0	0	0	0	0	0	0	0	0	0	0	0	0	0	0	0	0	0
XM_029260918	105032142	LOC105032142	uncharacterized LOC105032142, transcript variant X3	mRNA	XP_029116751.1	.	NW_011550943.1:869090-878918	3005	0	0	0	0	0	0	0	0	0	0	0	0	0	0	0	0	0	0	0	0	0	0	0	0	0	0	0	0	0	0
XM_029260926	105032142	LOC105032142	uncharacterized LOC105032142, transcript variant X14	mRNA	XP_029116759.1	.	NW_011550943.1:869147-878918	4422	0	0	0	0	0	0	0	0	0	0	0	0	0	0	0	0	0	0	0	0	0	0	0	0	0	0	0	0	0	0
XM_029260925	105032142	LOC105032142	uncharacterized LOC105032142, transcript variant X13	mRNA	XP_029116758.1	.	NW_011550943.1:872957-878918	3493	0	0	0	0	0	0	0	0	0	0	0	0	0	0	0	0	0	0	0	0	0	0	0	0	0	0	0	0	0	0
XM_029260927	105032142	LOC105032142	uncharacterized LOC105032142, transcript variant X15	mRNA	XP_029116760.1	.	NW_011550943.1:873824-879551	3417	0	0	0	0	0	0	0	0	0	0	0	0	0	0	0	0	0	0	0	0	0	0	0	0	0	0	0	0	0	0
XM_029260928	105032143	LOC105032143	DPH4 homolog, transcript variant X2	mRNA	XP_029116761.1	.	NW_011550943.1:901134-906182	1200	0	0	0	0	0	0	0	0	0	0	0	0	0	0	0	0	0	0	0	0	0	0	0	0	0	0	0	0	0	0
XM_010906504	105032143	LOC105032143	DPH4 homolog, transcript variant X1	mRNA	XP_010904806.1	.	NW_011550943.1:901884-906182	1224	0	0	0	0	0	0	0	0	0	0	0	0	0	0	0	0	0	0	0	0	0	0	0	0	0	0	0	0	0	0
XM_010906506	105032144	LOC105032144	zinc finger protein GAI-ASSOCIATED FACTOR 1-like	mRNA	XP_010904808.1	.	NW_011550943.1:892629-897534	1735	0	0	0	0	0	0	0	0	0	0	0	0	0	0	0	0	0	0	0	0	0	0	0	0	0	0	0	0	0	0
XM_010906507	105032145	LOC105032145	acyl-CoA-binding domain-containing protein 6, transcript variant X1	mRNA	XP_010904809.1	.	NW_011550943.1:917447-943723	2604	0	0	0	0	0	0	0	0	0	0	0	0	0	0	0	0	0	0	0	0	0	0	0	0	0	0	0	0	0	0
XM_010906508	105032145	LOC105032145	acyl-CoA-binding domain-containing protein 6, transcript variant X3	mRNA	XP_010904810.1	.	NW_011550943.1:917482-943723	2498	0	0	0	0	0	0	0	0	0	0	0	0	0	0	0	0	0	0	0	0	0	0	0	0	0	0	0	0	0	0
XM_029260930	105032145	LOC105032145	acyl-CoA-binding domain-containing protein 6, transcript variant X2	mRNA	XP_029116763.1	.	NW_011550943.1:917723-943723	2457	0	0	0	0	0	0	0	0	0	0	0	0	0	0	0	0	0	0	0	0	0	0	0	0	0	0	0	0	0	0
XM_010906510	105032146	LOC105032146	tubulin gamma-2 chain, transcript variant X2	mRNA	XP_010904812.1	.	NW_011550943.1:944777-964977	2191	0	0	0	0	0	0	0	0	0	0	0	0	0	0	0	0	0	0	0	0	0	0	0	0	0	0	0	0	0	0
XM_010906511	105032146	LOC105032146	tubulin gamma-2 chain, transcript variant X3	mRNA	XP_010904813.1	.	NW_011550943.1:944777-964977	2124	0	0	0	0	0	0	0	0	0	0	0	0	0	0	0	0	0	0	0	0	0	0	0	0	0	0	0	0	0	0
XM_029260931	105032146	LOC105032146	tubulin gamma-2 chain, transcript variant X4	mRNA	XP_029116764.1	.	NW_011550943.1:944797-964505	2330	0	0	0	0	0	0	0	0	0	0	0	0	0	0	0	0	0	0	0	0	0	0	0	0	0	0	0	0	0	0
XM_010906509	105032146	LOC105032146	tubulin gamma-2 chain, transcript variant X1	mRNA	XP_010904811.1	.	NW_011550943.1:944797-964975	2167	0	0	0	0	0	0	0	0	0	0	0	0	0	0	0	0	0	0	0	0	0	0	0	0	0	0	0	0	0	0
XM_010906516	105032147	LOC105032147	putative PAP-specific phosphatase, mitochondrial	mRNA	XP_010904818.1	.	chr1:61136698-61143111	1498	0	0	10	13	0	4	0	10	17	11	0	0	1.46923	1.66628	0	0.123254	0	1.29867	2.54305	0.360247	0	0	2.75347	2.87756	0	0.151418	0	2.55789	4.7961	0.453629
XM_010906513	105032148	LOC105032148	uncharacterized LOC105032148	mRNA	XP_010904815.1	.	NW_011550943.1:969429-982591	4095	0	0	0	0	0	0	0	0	0	0	0	0	0	0	0	0	0	0	0	0	0	0	0	0	0	0	0	0	0	0
XM_029260932	105032149	LOC105032149	uncharacterized LOC105032149, transcript variant X1	mRNA	XP_029116765.1	.	NW_011550943.1:998987-1010666	3854	0	0	0	0	0	0	0	0	0	0	0	0	0	0	0	0	0	0	0	0	0	0	0	0	0	0	0	0	0	0
XR_003798685	105032149	LOC105032149	uncharacterized LOC105032149, transcript variant X2	misc_RNA	.	.	NW_011550943.1:998987-1010666	3740	0	0	0	0	0	0	0	0	0	0	0	0	0	0	0	0	0	0	0	0	0	0	0	0	0	0	0	0	0	0
XR_003798686	105032149	LOC105032149	uncharacterized LOC105032149, transcript variant X3	misc_RNA	.	.	NW_011550943.1:998987-1010666	3493	0	0	0	0	0	0	0	0	0	0	0	0	0	0	0	0	0	0	0	0	0	0	0	0	0	0	0	0	0	0
XM_010906517	105032150	GST	probable glutathione S-transferase GSTF1	mRNA	XP_010904819.1	.	NW_011550943.1:1014921-1017151	973	0	0	0	0	0	0	0	0	0	0	0	0	0	0	0	0	0	0	0	0	0	0	0	0	0	0	0	0	0	0
XM_010906518	105032151	LOC105032151	probable glutathione S-transferase GSTF1	mRNA	XP_010904820.1	.	NW_011550943.1:1025782-1028504	1114	0	0	0	0	0	0	0	0	0	0	0	0	0	0	0	0	0	0	0	0	0	0	0	0	0	0	0	0	0	0
XM_010906520	105032152	LOC105032152	pentatricopeptide repeat-containing protein At5g56310, transcript variant X1	mRNA	XP_010904822.1	.	NW_011550943.1:1033237-1037366	2086	0	0	0	0	0	0	0	0	0	0	0	0	0	0	0	0	0	0	0	0	0	0	0	0	0	0	0	0	0	0
XM_010906519	105032152	LOC105032152	pentatricopeptide repeat-containing protein At5g56310, transcript variant X2	mRNA	XP_010904821.1	.	NW_011550943.1:1034554-1037366	2362	0	0	0	0	0	0	0	0	0	0	0	0	0	0	0	0	0	0	0	0	0	0	0	0	0	0	0	0	0	0
XM_010906522	105032154	LOC105032154	ATP-dependent DNA helicase Q-like SIM, transcript variant X1	mRNA	XP_010904824.1	.	NW_011550943.1:1044980-1065988	3694	0	0	0	0	0	0	0	0	0	0	0	0	0	0	0	0	0	0	0	0	0	0	0	0	0	0	0	0	0	0
XM_010906525	105032154	LOC105032154	ATP-dependent DNA helicase Q-like SIM, transcript variant X3	mRNA	XP_010904827.1	.	NW_011550943.1:1044980-1065989	3611	0	0	0	0	0	0	0	0	0	0	0	0	0	0	0	0	0	0	0	0	0	0	0	0	0	0	0	0	0	0
XM_029260934	105032154	LOC105032154	ATP-dependent DNA helicase Q-like SIM, transcript variant X2	mRNA	XP_029116767.1	.	NW_011550943.1:1044980-1065990	3612	0	0	0	0	0	0	0	0	0	0	0	0	0	0	0	0	0	0	0	0	0	0	0	0	0	0	0	0	0	0
XR_003798687	105032154	LOC105032154	ATP-dependent DNA helicase Q-like SIM, transcript variant X4	misc_RNA	.	.	NW_011550943.1:1044980-1066000	3650	0	0	0	0	0	0	0	0	0	0	0	0	0	0	0	0	0	0	0	0	0	0	0	0	0	0	0	0	0	0
gene-LOC105032155	105032155	LOC105032155	.	Gene	.	.	chr1:61148892-61150090	1103	1223	982	5	5	0	956	1535	0	0	881	56.5192	46.365	1.00435	0.871311	0	43.69	62.699	0	0	39.4875	78.1459	64.8946	1.88225	1.50469	0	53.6731	82.4054	0	0	49.7233
XM_010906526	105032156	LOC105032156	coiled-coil domain-containing protein SCD2	mRNA	XP_010904828.1	.	NW_011550943.1:550-51985	2212	0	0	0	0	0	0	0	0	0	0	0	0	0	0	0	0	0	0	0	0	0	0	0	0	0	0	0	0	0	0
XM_010906528	105032158	LOC105032158	uncharacterized LOC105032158	mRNA	XP_010904830.1	.	NW_011550943.1:479921-480715	795	0	0	0	0	0	0	0	0	0	0	0	0	0	0	0	0	0	0	0	0	0	0	0	0	0	0	0	0	0	0
gene-LOC105032160	105032160	LOC105032160	.	Gene	.	.	NW_011550943.1:997349-998506	1158	0	0	0	0	0	0	0	0	0	0	0	0	0	0	0	0	0	0	0	0	0	0	0	0	0	0	0	0	0	0
XM_010906529	105032161	LOC105032161	probable glutathione S-transferase GSTF1	mRNA	XP_010904831.1	.	NW_011550943.1:1030970-1031607	638	0	0	0	0	0	0	0	0	0	0	0	0	0	0	0	0	0	0	0	0	0	0	0	0	0	0	0	0	0	0
XM_019846180	105032162	LOC105032162	probable glutathione S-transferase GSTF1	mRNA	XP_019701739.2	.	NW_011550943.1:1032938-1033558	516	0	0	0	0	0	0	0	0	0	0	0	0	0	0	0	0	0	0	0	0	0	0	0	0	0	0	0	0	0	0
XM_029260935	105032163	LOC105032163	histidine-containing phosphotransfer protein 1	mRNA	XP_029116768.1	.	NW_011550944.1:127516-129290	499	0	0	0	0	0	0	0	0	0	0	0	0	0	0	0	0	0	0	0	0	0	0	0	0	0	0	0	0	0	0
XR_003798632	105032164	LOC105032164	uncharacterized LOC105032164, transcript variant X6	ncRNA	.	.	chr1:61166192-61179267	1596	0	0	0	0	0	0	0	0	0	0	0	0	0	0	0	0	0	0	0	0	0	0	0	0	0	0	0	0	0	0
XR_003798638	105032164	LOC105032164	uncharacterized LOC105032164, transcript variant X11	ncRNA	.	.	chr1:61166192-61179267	1403	0	0	0	0	0	0	0	0	0	0	0	0	0	0	0	0	0	0	0	0	0	0	0	0	0	0	0	0	0	0
XR_003798646	105032164	LOC105032164	uncharacterized LOC105032164, transcript variant X18	ncRNA	.	.	chr1:61166194-61179267	1585	0	0	0	0	0	0	0	0	0	0	0	0	0	0	0	0	0	0	0	0	0	0	0	0	0	0	0	0	0	0
XR_003798651	105032164	LOC105032164	uncharacterized LOC105032164, transcript variant X22	ncRNA	.	.	chr1:61166203-61178212	2690	0	0	0	0	0	0	0	0	0	0	0	0	0	0	0	0	0	0	0	0	0	0	0	0	0	0	0	0	0	0
XR_003798627	105032164	LOC105032164	uncharacterized LOC105032164, transcript variant X1	ncRNA	.	.	chr1:61166203-61179267	2162	0	0	0	0	0	0	0	0	0	0	0	0	0	0	0	0	0	0	0	0	0	0	0	0	0	0	0	0	0	0
XR_003798628	105032164	LOC105032164	uncharacterized LOC105032164, transcript variant X2	ncRNA	.	.	chr1:61166203-61179267	2448	0	0	0	0	0	0	0	0	0	0	0	0	0	0	0	0	0	0	0	0	0	0	0	0	0	0	0	0	0	0
XR_003798629	105032164	LOC105032164	uncharacterized LOC105032164, transcript variant X3	ncRNA	.	.	chr1:61166203-61179267	1969	0	0	0	0	0	0	0	0	0	0	0	0	0	0	0	0	0	0	0	0	0	0	0	0	0	0	0	0	0	0
XR_003798630	105032164	LOC105032164	uncharacterized LOC105032164, transcript variant X4	ncRNA	.	.	chr1:61166203-61179267	2190	0	0	0	0	0	0	0	0	0	0	0	0	0	0	0	0	0	0	0	0	0	0	0	0	0	0	0	0	0	0
XR_003798631	105032164	LOC105032164	uncharacterized LOC105032164, transcript variant X5	ncRNA	.	.	chr1:61166203-61179267	2004	0	0	0	0	0	0	0	0	0	0	0	0	0	0	0	0	0	0	0	0	0	0	0	0	0	0	0	0	0	0
XR_003798634	105032164	LOC105032164	uncharacterized LOC105032164, transcript variant X7	ncRNA	.	.	chr1:61166203-61179267	2054	0	0	0	0	0	0	0	0	0	0	0	0	0	0	0	0	0	0	0	0	0	0	0	0	0	0	0	0	0	0
XR_003798635	105032164	LOC105032164	uncharacterized LOC105032164, transcript variant X8	ncRNA	.	.	chr1:61166203-61179267	2127	0	0	0	0	0	0	0	0	0	0	0	0	0	0	0	0	0	0	0	0	0	0	0	0	0	0	0	0	0	0
XR_003798636	105032164	LOC105032164	uncharacterized LOC105032164, transcript variant X9	ncRNA	.	.	chr1:61166203-61179267	1532	0	0	0	0	0	0	0	0	0	0	0	0	0	0	0	0	0	0	0	0	0	0	0	0	0	0	0	0	0	0
XR_003798637	105032164	LOC105032164	uncharacterized LOC105032164, transcript variant X10	ncRNA	.	.	chr1:61166203-61179267	2087	0	0	0	0	0	0	0	0	0	0	0	0	0	0	0	0	0	0	0	0	0	0	0	0	0	0	0	0	0	0
XR_003798640	105032164	LOC105032164	uncharacterized LOC105032164, transcript variant X12	ncRNA	.	.	chr1:61166203-61179267	1861	0	0	0	0	0	0	0	0	0	0	0	0	0	0	0	0	0	0	0	0	0	0	0	0	0	0	0	0	0	0
XR_003798641	105032164	LOC105032164	uncharacterized LOC105032164, transcript variant X13	ncRNA	.	.	chr1:61166203-61179267	2153	0	0	0	0	0	0	0	0	0	0	0	0	0	0	0	0	0	0	0	0	0	0	0	0	0	0	0	0	0	0
XR_003798642	105032164	LOC105032164	uncharacterized LOC105032164, transcript variant X14	ncRNA	.	.	chr1:61166203-61179267	2115	0	0	0	0	0	0	0	0	0	0	0	0	0	0	0	0	0	0	0	0	0	0	0	0	0	0	0	0	0	0
XR_003798643	105032164	LOC105032164	uncharacterized LOC105032164, transcript variant X15	ncRNA	.	.	chr1:61166203-61179267	2461	0	0	0	0	0	0	0	0	0	0	0	0	0	0	0	0	0	0	0	0	0	0	0	0	0	0	0	0	0	0
XR_003798644	105032164	LOC105032164	uncharacterized LOC105032164, transcript variant X16	ncRNA	.	.	chr1:61166203-61179267	2042	0	0	0	0	0	0	0	0	0	0	0	0	0	0	0	0	0	0	0	0	0	0	0	0	0	0	0	0	0	0
XR_003798645	105032164	LOC105032164	uncharacterized LOC105032164, transcript variant X17	ncRNA	.	.	chr1:61166203-61179267	2052	0	0	0	0	0	0	0	0	0	0	0	0	0	0	0	0	0	0	0	0	0	0	0	0	0	0	0	0	0	0
XR_003798648	105032164	LOC105032164	uncharacterized LOC105032164, transcript variant X19	ncRNA	.	.	chr1:61166203-61179267	1419	0	0	0	0	0	0	0	0	0	0	0	0	0	0	0	0	0	0	0	0	0	0	0	0	0	0	0	0	0	0
XR_003798649	105032164	LOC105032164	uncharacterized LOC105032164, transcript variant X20	ncRNA	.	.	chr1:61166203-61179267	1705	0	0	0	0	0	0	0	0	0	0	0	0	0	0	0	0	0	0	0	0	0	0	0	0	0	0	0	0	0	0
XR_003798650	105032164	LOC105032164	uncharacterized LOC105032164, transcript variant X21	ncRNA	.	.	chr1:61166203-61179267	1339	0	0	0	0	0	0	0	0	0	0	0	0	0	0	0	0	0	0	0	0	0	0	0	0	0	0	0	0	0	0
XM_010906532	105032165	LOC105032165	uncharacterized LOC105032165, transcript variant X1	mRNA	XP_010904834.3	.	NW_011550944.1:131326-164090	3063	0	0	0	0	0	0	0	0	0	0	0	0	0	0	0	0	0	0	0	0	0	0	0	0	0	0	0	0	0	0
XM_029260938	105032165	LOC105032165	uncharacterized LOC105032165, transcript variant X4	mRNA	XP_029116771.1	.	NW_011550944.1:131585-163391	2572	0	0	0	0	0	0	0	0	0	0	0	0	0	0	0	0	0	0	0	0	0	0	0	0	0	0	0	0	0	0
XM_019846204	105032165	LOC105032165	uncharacterized LOC105032165, transcript variant X2	mRNA	XP_019701763.1	.	NW_011550944.1:131585-163708	2741	0	0	0	0	0	0	0	0	0	0	0	0	0	0	0	0	0	0	0	0	0	0	0	0	0	0	0	0	0	0
XM_029260937	105032165	LOC105032165	uncharacterized LOC105032165, transcript variant X3	mRNA	XP_029116770.1	.	NW_011550944.1:131585-163709	2763	0	0	0	0	0	0	0	0	0	0	0	0	0	0	0	0	0	0	0	0	0	0	0	0	0	0	0	0	0	0
XM_010906533	105032166	LOC105032166	transformation/transcription domain-associated protein, transcript variant X1	mRNA	XP_010904835.1	.	NW_011550944.1:245300-310705	12237	0	0	0	0	0	0	0	0	0	0	0	0	0	0	0	0	0	0	0	0	0	0	0	0	0	0	0	0	0	0
XM_029260939	105032166	LOC105032166	transformation/transcription domain-associated protein, transcript variant X3	mRNA	XP_029116772.1	.	NW_011550944.1:245593-300661	10418	0	0	0	0	0	0	0	0	0	0	0	0	0	0	0	0	0	0	0	0	0	0	0	0	0	0	0	0	0	0
XM_019846208	105032166	LOC105032166	transformation/transcription domain-associated protein, transcript variant X2	mRNA	XP_019701767.1	.	NW_011550944.1:245593-309249	10784	0	0	0	0	0	0	0	0	0	0	0	0	0	0	0	0	0	0	0	0	0	0	0	0	0	0	0	0	0	0
XM_010906534	105032167	LOC105032167	gibberellin receptor GID1C	mRNA	XP_010904836.1	.	NW_011550944.1:656643-660125	2131	0	0	0	0	0	0	0	0	0	0	0	0	0	0	0	0	0	0	0	0	0	0	0	0	0	0	0	0	0	0
XM_010906535	105032168	LOC105032168	serine/arginine-rich SC35-like splicing factor SCL28	mRNA	XP_010904837.1	.	NW_011550944.1:924795-960850	1075	0	0	0	0	0	0	0	0	0	0	0	0	0	0	0	0	0	0	0	0	0	0	0	0	0	0	0	0	0	0
XM_010906536	105032169	LOC105032169	protein REVEILLE 6	mRNA	XP_010904838.1	.	NW_011550944.1:1054912-1057201	1083	0	0	0	0	0	0	0	0	0	0	0	0	0	0	0	0	0	0	0	0	0	0	0	0	0	0	0	0	0	0
XM_010906537	105032170	LOC105032170	serine/threonine-protein phosphatase BSL1 homolog	mRNA	XP_010904839.1	.	NW_011550944.1:1218541-1296172	3050	0	0	0	0	0	0	0	0	0	0	0	0	0	0	0	0	0	0	0	0	0	0	0	0	0	0	0	0	0	0
XM_010906538	105032171	LOC105032171	LRR receptor-like serine/threonine-protein kinase ERL1	mRNA	XP_010904840.2	.	NW_011550944.1:241358-243335	1978	0	0	0	0	0	0	0	0	0	0	0	0	0	0	0	0	0	0	0	0	0	0	0	0	0	0	0	0	0	0
XM_010906539	105032172	LOC105032172	UDP-glucuronate 4-epimerase 4-like	mRNA	XP_010904841.1	.	NW_011550944.1:713424-713894	471	0	0	0	0	0	0	0	0	0	0	0	0	0	0	0	0	0	0	0	0	0	0	0	0	0	0	0	0	0	0
XM_029260936	105032173	LOC105032173	probable protein S-acyltransferase 17	mRNA	XP_029116769.1	.	NW_011550944.1:1045380-1069363	1829	0	0	0	0	0	0	0	0	0	0	0	0	0	0	0	0	0	0	0	0	0	0	0	0	0	0	0	0	0	0
XM_010906542	105032174	LOC105032174	chlorophyll a-b binding protein of LHCII type 1	mRNA	XP_010904844.1	.	NW_011550945.1:8216-9271	1056	0	0	0	0	0	0	0	0	0	0	0	0	0	0	0	0	0	0	0	0	0	0	0	0	0	0	0	0	0	0
XM_010906547	105032175	LOC105032175	protein THYLAKOID FORMATION1, chloroplastic	mRNA	XP_010904849.1	.	chr1:61180987-61190841	1331	187	132	51	48	61	188	394	35	31	224	7.15704	5.14461	8.35729	7.09606	7.36879	7.11029	13.3166	5.41173	5.2887	8.32312	9.89564	7.20064	15.6623	12.2544	13.1266	8.73497	17.502	10.6591	9.9743	10.4806
XM_029260941	105032176	LOC105032176	sec14 cytosolic factor, transcript variant X2	mRNA	XP_029116774.1	.	NW_011550945.1:91055-115539	1008	0	0	0	0	0	0	0	0	0	0	0	0	0	0	0	0	0	0	0	0	0	0	0	0	0	0	0	0	0	0
XM_029260943	105032176	LOC105032176	sec14 cytosolic factor, transcript variant X6	mRNA	XP_029116776.1	.	NW_011550945.1:91055-115539	981	0	0	0	0	0	0	0	0	0	0	0	0	0	0	0	0	0	0	0	0	0	0	0	0	0	0	0	0	0	0
XM_010906545	105032176	LOC105032176	sec14 cytosolic factor, transcript variant X3	mRNA	XP_010904847.1	.	NW_011550945.1:91206-115539	943	0	0	0	0	0	0	0	0	0	0	0	0	0	0	0	0	0	0	0	0	0	0	0	0	0	0	0	0	0	0
XM_010906546	105032176	LOC105032176	sec14 cytosolic factor, transcript variant X5	mRNA	XP_010904848.1	.	NW_011550945.1:91206-115539	923	0	0	0	0	0	0	0	0	0	0	0	0	0	0	0	0	0	0	0	0	0	0	0	0	0	0	0	0	0	0
XM_010906543	105032176	LOC105032176	sec14 cytosolic factor, transcript variant X1	mRNA	XP_010904845.1	.	NW_011550945.1:91213-115830	1234	0	0	0	0	0	0	0	0	0	0	0	0	0	0	0	0	0	0	0	0	0	0	0	0	0	0	0	0	0	0
XM_029260942	105032176	LOC105032176	sec14 cytosolic factor, transcript variant X4	mRNA	XP_029116775.1	.	NW_011550945.1:91418-115539	1099	0	0	0	0	0	0	0	0	0	0	0	0	0	0	0	0	0	0	0	0	0	0	0	0	0	0	0	0	0	0
XM_010906549	105032177	LOC105032177	putative disease resistance protein RGA3, transcript variant X1	mRNA	XP_010904851.1	.	NW_011550945.1:172598-188560	3296	0	0	0	0	0	0	0	0	0	0	0	0	0	0	0	0	0	0	0	0	0	0	0	0	0	0	0	0	0	0
XM_010906551	105032177	LOC105032177	putative disease resistance protein RGA3, transcript variant X3	mRNA	XP_010904853.1	.	NW_011550945.1:172605-188560	3259	0	0	0	0	0	0	0	0	0	0	0	0	0	0	0	0	0	0	0	0	0	0	0	0	0	0	0	0	0	0
XM_010906550	105032177	LOC105032177	putative disease resistance protein RGA3, transcript variant X2	mRNA	XP_010904852.1	.	NW_011550945.1:172612-188572	3384	0	0	0	0	0	0	0	0	0	0	0	0	0	0	0	0	0	0	0	0	0	0	0	0	0	0	0	0	0	0
XM_010906553	105032178	LOC105032178	major pollen allergen Ole e 10	mRNA	XP_010904855.1	.	NW_011550945.1:210022-211543	767	0	0	0	0	0	0	0	0	0	0	0	0	0	0	0	0	0	0	0	0	0	0	0	0	0	0	0	0	0	0
XM_029260945	105032179	LOC105032179	uncharacterized LOC105032179, transcript variant X1	mRNA	XP_029116778.1	.	NW_011550945.1:210696-226042	2937	0	0	0	0	0	0	0	0	0	0	0	0	0	0	0	0	0	0	0	0	0	0	0	0	0	0	0	0	0	0
XM_029260946	105032179	LOC105032179	uncharacterized LOC105032179, transcript variant X2	mRNA	XP_029116779.1	.	NW_011550945.1:210696-226042	2980	0	0	0	0	0	0	0	0	0	0	0	0	0	0	0	0	0	0	0	0	0	0	0	0	0	0	0	0	0	0
XM_029260947	105032179	LOC105032179	uncharacterized LOC105032179, transcript variant X3	mRNA	XP_029116780.1	.	NW_011550945.1:210696-226043	2797	0	0	0	0	0	0	0	0	0	0	0	0	0	0	0	0	0	0	0	0	0	0	0	0	0	0	0	0	0	0
XM_029260948	105032179	LOC105032179	uncharacterized LOC105032179, transcript variant X4	mRNA	XP_029116781.1	.	NW_011550945.1:210696-226043	2703	0	0	0	0	0	0	0	0	0	0	0	0	0	0	0	0	0	0	0	0	0	0	0	0	0	0	0	0	0	0
XM_029260949	105032179	LOC105032179	uncharacterized LOC105032179, transcript variant X5	mRNA	XP_029116782.1	.	NW_011550945.1:210696-226044	2795	0	0	0	0	0	0	0	0	0	0	0	0	0	0	0	0	0	0	0	0	0	0	0	0	0	0	0	0	0	0
XM_010906559	105032180	LOC105032180	vesicle-associated protein 4-2	mRNA	XP_010904861.1	.	chr1:61213808-61217058	1215	119	55	208	308	296	85	15	162	109	129	4.98208	2.31749	37.8766	50.6759	39.2114	3.48608	0.536426	27.9369	20.2151	5.23442	6.88845	3.24367	70.984	87.5137	69.8503	4.28264	0.705025	55.0253	38.125	6.59126
XM_010906555	105032181	LOC105032181	uncharacterized LOC105032181	mRNA	XP_010904857.1	.	NW_011550945.1:263860-265260	1401	0	0	0	0	0	0	0	0	0	0	0	0	0	0	0	0	0	0	0	0	0	0	0	0	0	0	0	0	0	0
XM_010906556	105032182	LOC105032182	protein MEI2-like 2, transcript variant X3	mRNA	XP_010904858.1	.	NW_011550945.1:313201-323995	3478	0	0	0	0	0	0	0	0	0	0	0	0	0	0	0	0	0	0	0	0	0	0	0	0	0	0	0	0	0	0
XM_029260950	105032182	LOC105032182	protein MEI2-like 2, transcript variant X1	mRNA	XP_029116783.1	.	NW_011550945.1:313201-323996	3587	0	0	0	0	0	0	0	0	0	0	0	0	0	0	0	0	0	0	0	0	0	0	0	0	0	0	0	0	0	0
XM_029260952	105032182	LOC105032182	protein MEI2-like 2, transcript variant X4	mRNA	XP_029116785.1	.	NW_011550945.1:313201-323998	3409	0	0	0	0	0	0	0	0	0	0	0	0	0	0	0	0	0	0	0	0	0	0	0	0	0	0	0	0	0	0
XM_029260951	105032182	LOC105032182	protein MEI2-like 2, transcript variant X2	mRNA	XP_029116784.1	.	NW_011550945.1:313201-324012	3500	0	0	0	0	0	0	0	0	0	0	0	0	0	0	0	0	0	0	0	0	0	0	0	0	0	0	0	0	0	0
XM_010906560	105032183	LOC105032183	glycerol-3-phosphate acyltransferase 1-like	mRNA	XP_010904862.2	.	NW_011550945.1:352855-355350	1712	0	0	0	0	0	0	0	0	0	0	0	0	0	0	0	0	0	0	0	0	0	0	0	0	0	0	0	0	0	0
XR_829757	105032184	LOC105032184	uncharacterized LOC105032184	ncRNA	.	.	NW_011550945.1:358360-360488	1595	0	0	0	0	0	0	0	0	0	0	0	0	0	0	0	0	0	0	0	0	0	0	0	0	0	0	0	0	0	0
XM_010906562	105032185	LOC105032185	uncharacterized LOC105032185, transcript variant X2	mRNA	XP_010904864.1	.	NW_011550945.1:371828-378499	794	0	0	0	0	0	0	0	0	0	0	0	0	0	0	0	0	0	0	0	0	0	0	0	0	0	0	0	0	0	0
XR_003798688	105032185	LOC105032185	uncharacterized LOC105032185, transcript variant X3	misc_RNA	.	.	NW_011550945.1:372125-378499	1012	0	0	0	0	0	0	0	0	0	0	0	0	0	0	0	0	0	0	0	0	0	0	0	0	0	0	0	0	0	0
XM_010906561	105032185	LOC105032185	uncharacterized LOC105032185, transcript variant X1	mRNA	XP_010904863.1	.	NW_011550945.1:372132-378499	908	0	0	0	0	0	0	0	0	0	0	0	0	0	0	0	0	0	0	0	0	0	0	0	0	0	0	0	0	0	0
XM_010906563	105032186	LOC105032186	transcription factor bHLH149-like	mRNA	XP_010904865.1	.	NW_011550945.1:381805-382688	884	0	0	0	0	0	0	0	0	0	0	0	0	0	0	0	0	0	0	0	0	0	0	0	0	0	0	0	0	0	0
XM_010906564	105032187	LOC105032187	uncharacterized LOC105032187	mRNA	XP_010904866.1	.	NW_011550945.1:402649-408746	750	0	0	0	0	0	0	0	0	0	0	0	0	0	0	0	0	0	0	0	0	0	0	0	0	0	0	0	0	0	0
XM_010906565	105032188	LOC105032188	probable folate-biopterin transporter 4	mRNA	XP_010904867.1	.	NW_011550945.1:412164-423767	2165	0	0	0	0	0	0	0	0	0	0	0	0	0	0	0	0	0	0	0	0	0	0	0	0	0	0	0	0	0	0
XM_010906569	105032189	LOC105032189	uncharacterized LOC105032189	mRNA	XP_010904871.1	.	chr1:61260672-61262151	1323	117	88	1008	757	970	109	125	232	277	219	4.50648	3.433	168.893	114.482	118.156	4.11733	4.23807	36.7162	47.5583	8.18869	6.23086	4.80499	316.52	197.702	210.48	5.05813	5.5701	72.3172	89.6934	10.3113
XM_010906567	105032190	LOC105032190	transcription factor bHLH144	mRNA	XP_010904869.1	.	NW_011550945.1:434624-437707	2052	0	0	0	0	0	0	0	0	0	0	0	0	0	0	0	0	0	0	0	0	0	0	0	0	0	0	0	0	0	0
XM_029260953	105032191	LOC105032191	putative oligosaccharyltransferase complex subunit CG9662, transcript variant X1	mRNA	XP_029116786.1	.	NW_011550945.1:440263-446889	1865	0	0	0	0	0	0	0	0	0	0	0	0	0	0	0	0	0	0	0	0	0	0	0	0	0	0	0	0	0	0
XM_029260954	105032191	LOC105032191	putative oligosaccharyltransferase complex subunit CG9662, transcript variant X2	mRNA	XP_029116787.1	.	NW_011550945.1:440263-446889	1813	0	0	0	0	0	0	0	0	0	0	0	0	0	0	0	0	0	0	0	0	0	0	0	0	0	0	0	0	0	0
XM_029260955	105032191	LOC105032191	putative oligosaccharyltransferase complex subunit CG9662, transcript variant X3	mRNA	XP_029116788.1	.	NW_011550945.1:440263-446889	1673	0	0	0	0	0	0	0	0	0	0	0	0	0	0	0	0	0	0	0	0	0	0	0	0	0	0	0	0	0	0
XM_029260957	105032191	LOC105032191	putative oligosaccharyltransferase complex subunit CG9662, transcript variant X4	mRNA	XP_029116790.1	.	NW_011550945.1:440263-446889	1786	0	0	0	0	0	0	0	0	0	0	0	0	0	0	0	0	0	0	0	0	0	0	0	0	0	0	0	0	0	0
XM_010906570	105032193	LOC105032193	uncharacterized protein At2g34460, chloroplastic, transcript variant X1	mRNA	XP_010904872.1	.	NW_011550945.1:455624-457293	1079	0	0	0	0	0	0	0	0	0	0	0	0	0	0	0	0	0	0	0	0	0	0	0	0	0	0	0	0	0	0
XM_010906571	105032193	LOC105032193	uncharacterized protein At2g34460, chloroplastic, transcript variant X2	mRNA	XP_010904873.1	.	NW_011550945.1:455624-457293	1076	0	0	0	0	0	0	0	0	0	0	0	0	0	0	0	0	0	0	0	0	0	0	0	0	0	0	0	0	0	0
XM_010906572	105032194	LOC105032194	GDSL esterase/lipase At4g10955	mRNA	XP_010904874.1	.	NW_011550945.1:469634-471989	1732	0	0	0	0	0	0	0	0	0	0	0	0	0	0	0	0	0	0	0	0	0	0	0	0	0	0	0	0	0	0
XM_010906573	105032195	LOC105032195	aspartyl protease family protein 2-like	mRNA	XP_010904875.1	.	NW_011550945.1:490594-492814	2221	0	0	0	0	0	0	0	0	0	0	0	0	0	0	0	0	0	0	0	0	0	0	0	0	0	0	0	0	0	0
XM_019846211	105032196	LOC105032196	persulfide dioxygenase ETHE1 homolog, mitochondrial, transcript variant X2	mRNA	XP_019701770.1	.	NW_011550945.1:494201-501213	1390	0	0	0	0	0	0	0	0	0	0	0	0	0	0	0	0	0	0	0	0	0	0	0	0	0	0	0	0	0	0
XM_010906574	105032196	LOC105032196	persulfide dioxygenase ETHE1 homolog, mitochondrial, transcript variant X1	mRNA	XP_010904876.1	.	NW_011550945.1:494240-501211	1374	0	0	0	0	0	0	0	0	0	0	0	0	0	0	0	0	0	0	0	0	0	0	0	0	0	0	0	0	0	0
XM_010906575	105032197	LOC105032197	vacuolar cation/proton exchanger 1a, transcript variant X1	mRNA	XP_010904877.1	.	NW_011550945.1:525750-535950	1782	0	0	0	0	0	0	0	0	0	0	0	0	0	0	0	0	0	0	0	0	0	0	0	0	0	0	0	0	0	0
XM_010906576	105032197	LOC105032197	vacuolar cation/proton exchanger 1a, transcript variant X2	mRNA	XP_010904878.1	.	NW_011550945.1:525750-535950	1779	0	0	0	0	0	0	0	0	0	0	0	0	0	0	0	0	0	0	0	0	0	0	0	0	0	0	0	0	0	0
XR_002163327	105032197	LOC105032197	vacuolar cation/proton exchanger 1a, transcript variant X3	misc_RNA	.	.	NW_011550945.1:525750-535950	1801	0	0	0	0	0	0	0	0	0	0	0	0	0	0	0	0	0	0	0	0	0	0	0	0	0	0	0	0	0	0
XM_010906580	105032198	LOC105032198	sugar transport protein MST3	mRNA	XP_010904882.1	.	chr1:61300079-61304175	1915	0	0	0	4	0	0	0	0	7	0	0	0	0	0.322573	0	0	0	0	0.798859	0	0	0	0	0.55706	0	0	0	0	1.50662	0
XM_010906577	105032199	LOC105032199	apoptosis inhibitor 5-like protein API5	mRNA	XP_010904879.1	.	NW_011550945.1:549320-565291	2111	0	0	0	0	0	0	0	0	0	0	0	0	0	0	0	0	0	0	0	0	0	0	0	0	0	0	0	0	0	0
XM_019846223	105032200	LOC105032200	homogentisate 1,2-dioxygenase, transcript variant X1	mRNA	XP_019701782.1	.	NW_011550945.1:572101-573894	674	0	0	0	0	0	0	0	0	0	0	0	0	0	0	0	0	0	0	0	0	0	0	0	0	0	0	0	0	0	0
XR_002163340	105032200	LOC105032200	homogentisate 1,2-dioxygenase, transcript variant X9	misc_RNA	.	.	NW_011550945.1:572101-576170	2791	0	0	0	0	0	0	0	0	0	0	0	0	0	0	0	0	0	0	0	0	0	0	0	0	0	0	0	0	0	0
XR_002163344	105032200	LOC105032200	homogentisate 1,2-dioxygenase, transcript variant X14	misc_RNA	.	.	NW_011550945.1:572101-576170	2644	0	0	0	0	0	0	0	0	0	0	0	0	0	0	0	0	0	0	0	0	0	0	0	0	0	0	0	0	0	0
XR_003798692	105032200	LOC105032200	homogentisate 1,2-dioxygenase, transcript variant X17	misc_RNA	.	.	NW_011550945.1:572101-576170	2379	0	0	0	0	0	0	0	0	0	0	0	0	0	0	0	0	0	0	0	0	0	0	0	0	0	0	0	0	0	0
XR_829763	105032200	LOC105032200	homogentisate 1,2-dioxygenase, transcript variant X12	misc_RNA	.	.	NW_011550945.1:572101-576170	2712	0	0	0	0	0	0	0	0	0	0	0	0	0	0	0	0	0	0	0	0	0	0	0	0	0	0	0	0	0	0
XR_829765	105032200	LOC105032200	homogentisate 1,2-dioxygenase, transcript variant X13	misc_RNA	.	.	NW_011550945.1:572101-576170	2651	0	0	0	0	0	0	0	0	0	0	0	0	0	0	0	0	0	0	0	0	0	0	0	0	0	0	0	0	0	0
XR_829771	105032200	LOC105032200	homogentisate 1,2-dioxygenase, transcript variant X16	misc_RNA	.	.	NW_011550945.1:572101-576170	2396	0	0	0	0	0	0	0	0	0	0	0	0	0	0	0	0	0	0	0	0	0	0	0	0	0	0	0	0	0	0
XR_002163332	105032200	LOC105032200	homogentisate 1,2-dioxygenase, transcript variant X2	misc_RNA	.	.	NW_011550945.1:572101-580428	2457	0	0	0	0	0	0	0	0	0	0	0	0	0	0	0	0	0	0	0	0	0	0	0	0	0	0	0	0	0	0
XR_002163333	105032200	LOC105032200	homogentisate 1,2-dioxygenase, transcript variant X4	misc_RNA	.	.	NW_011550945.1:572101-580428	2426	0	0	0	0	0	0	0	0	0	0	0	0	0	0	0	0	0	0	0	0	0	0	0	0	0	0	0	0	0	0
XR_002163334	105032200	LOC105032200	homogentisate 1,2-dioxygenase, transcript variant X3	misc_RNA	.	.	NW_011550945.1:572101-580428	2184	0	0	0	0	0	0	0	0	0	0	0	0	0	0	0	0	0	0	0	0	0	0	0	0	0	0	0	0	0	0
XR_002163336	105032200	LOC105032200	homogentisate 1,2-dioxygenase, transcript variant X5	misc_RNA	.	.	NW_011550945.1:572101-580428	2186	0	0	0	0	0	0	0	0	0	0	0	0	0	0	0	0	0	0	0	0	0	0	0	0	0	0	0	0	0	0
XR_002163337	105032200	LOC105032200	homogentisate 1,2-dioxygenase, transcript variant X6	misc_RNA	.	.	NW_011550945.1:572101-580428	2480	0	0	0	0	0	0	0	0	0	0	0	0	0	0	0	0	0	0	0	0	0	0	0	0	0	0	0	0	0	0
XR_002163338	105032200	LOC105032200	homogentisate 1,2-dioxygenase, transcript variant X8	misc_RNA	.	.	NW_011550945.1:572101-580428	2440	0	0	0	0	0	0	0	0	0	0	0	0	0	0	0	0	0	0	0	0	0	0	0	0	0	0	0	0	0	0
XR_002163339	105032200	LOC105032200	homogentisate 1,2-dioxygenase, transcript variant X7	misc_RNA	.	.	NW_011550945.1:572101-580428	2445	0	0	0	0	0	0	0	0	0	0	0	0	0	0	0	0	0	0	0	0	0	0	0	0	0	0	0	0	0	0
XR_002163341	105032200	LOC105032200	homogentisate 1,2-dioxygenase, transcript variant X10	misc_RNA	.	.	NW_011550945.1:572101-580428	2317	0	0	0	0	0	0	0	0	0	0	0	0	0	0	0	0	0	0	0	0	0	0	0	0	0	0	0	0	0	0
XR_002163343	105032200	LOC105032200	homogentisate 1,2-dioxygenase, transcript variant X15	misc_RNA	.	.	NW_011550945.1:572101-580428	2300	0	0	0	0	0	0	0	0	0	0	0	0	0	0	0	0	0	0	0	0	0	0	0	0	0	0	0	0	0	0
XR_003798691	105032200	LOC105032200	homogentisate 1,2-dioxygenase, transcript variant X11	misc_RNA	.	.	NW_011550945.1:572101-580428	2340	0	0	0	0	0	0	0	0	0	0	0	0	0	0	0	0	0	0	0	0	0	0	0	0	0	0	0	0	0	0
XM_010906581	105032201	LOC105032201	rac-like GTP-binding protein RAC13	mRNA	XP_010904883.1	.	NW_011550945.1:598870-601375	966	0	0	0	0	0	0	0	0	0	0	0	0	0	0	0	0	0	0	0	0	0	0	0	0	0	0	0	0	0	0
XM_010906582	105032202	LOC105032202	ras-related protein RABA1f	mRNA	XP_010904884.1	.	NW_011550945.1:602685-614578	1475	0	0	0	0	0	0	0	0	0	0	0	0	0	0	0	0	0	0	0	0	0	0	0	0	0	0	0	0	0	0
XM_010906583	105032203	LOC105032203	probable E3 ubiquitin-protein ligase ZFP1	mRNA	XP_010904885.1	.	NW_011550945.1:616451-621693	2318	0	0	0	0	0	0	0	0	0	0	0	0	0	0	0	0	0	0	0	0	0	0	0	0	0	0	0	0	0	0
XR_829773	105032204	LOC105032204	uncharacterized LOC105032204, transcript variant X1	ncRNA	.	.	chr1:61321287-61323646	531	0	0	0	0	0	0	0	0	0	0	0	0	0	0	0	0	0	0	0	0	0	0	0	0	0	0	0	0	0	0
XR_003799774	105032204	LOC105032204	uncharacterized LOC105032204, transcript variant X2	ncRNA	.	.	chr1:61321287-61323848	681	0	0	0	0	0	0	0	0	0	0	0	0	0	0	0	0	0	0	0	0	0	0	0	0	0	0	0	0	0	0
XM_010906584	105032205	LOC105032205	uncharacterized LOC105032205, transcript variant X1	mRNA	XP_010904886.1	.	NW_011550945.1:626054-637252	2766	0	0	0	0	0	0	0	0	0	0	0	0	0	0	0	0	0	0	0	0	0	0	0	0	0	0	0	0	0	0
XM_010906585	105032205	LOC105032205	uncharacterized LOC105032205, transcript variant X2	mRNA	XP_010904887.1	.	NW_011550945.1:626054-637253	2683	0	0	0	0	0	0	0	0	0	0	0	0	0	0	0	0	0	0	0	0	0	0	0	0	0	0	0	0	0	0
XM_010906586	105032205	LOC105032205	uncharacterized LOC105032205, transcript variant X3	mRNA	XP_010904888.1	.	NW_011550945.1:626054-637253	2584	0	0	0	0	0	0	0	0	0	0	0	0	0	0	0	0	0	0	0	0	0	0	0	0	0	0	0	0	0	0
XM_010906587	105032206	LOC105032206	transcription factor VOZ1	mRNA	XP_010904889.1	.	NW_011550945.1:639093-645706	2609	0	0	0	0	0	0	0	0	0	0	0	0	0	0	0	0	0	0	0	0	0	0	0	0	0	0	0	0	0	0
XM_029260959	105032208	LOC105032208	putative OPA3-like protein CG13603	mRNA	XP_029116792.1	.	NW_011550945.1:646697-655733	1228	0	0	0	0	0	0	0	0	0	0	0	0	0	0	0	0	0	0	0	0	0	0	0	0	0	0	0	0	0	0
XM_010906588	105032209	LOC105032209	histone H3.2	mRNA	XP_010904890.1	.	NW_011550945.1:655794-656528	735	0	0	0	0	0	0	0	0	0	0	0	0	0	0	0	0	0	0	0	0	0	0	0	0	0	0	0	0	0	0
XM_029260940	105032210	LOC105032210	zinc finger protein NUTCRACKER-like	mRNA	XP_029116773.1	.	NW_011550945.1:657682-659751	1666	0	0	0	0	0	0	0	0	0	0	0	0	0	0	0	0	0	0	0	0	0	0	0	0	0	0	0	0	0	0
XM_010906593	105032211	LOC105032211	vacuolar protein 8, transcript variant X1	mRNA	XP_010904895.2	.	chr1:61350976-61366240	5830	0	0	0	0	0	0	0	0	0	0	0	0	0	0	0	0	0	0	0	0	0	0	0	0	0	0	0	0	0	0
XM_029260876	105032211	LOC105032211	vacuolar protein 8, transcript variant X2	mRNA	XP_029116709.1	.	chr1:61350976-61366240	5899	29	17	0	14	24	0	0	0	8	9	0.24234	0.147617	0	0.445161	0.631608	0	0	0	0.2698	0.069802	0.33507	0.206611	0	0.768762	1.12513	0	0	0	0.508834	0.087896
XM_029260880	105032211	LOC105032211	vacuolar protein 8, transcript variant X3	mRNA	XP_029116713.1	.	chr1:61350976-61366240	4777	0	0	0	0	0	0	0	0	0	0	0	0	0	0	0	0	0	0	0	0	0	0	0	0	0	0	0	0	0	0
XM_029260882	105032211	LOC105032211	vacuolar protein 8, transcript variant X4	mRNA	XP_029116715.1	.	chr1:61350976-61366240	4544	0	0	0	0	0	0	0	0	0	0	0	0	0	0	0	0	0	0	0	0	0	0	0	0	0	0	0	0	0	0
XM_010906601	105032211	LOC105032211	vacuolar protein 8, transcript variant X5	mRNA	XP_010904903.2	.	chr1:61351423-61366240	5830	0	0	0	0	0	0	0	0	0	0	0	0	0	0	0	0	0	0	0	0	0	0	0	0	0	0	0	0	0	0
XM_010906590	105032213	LOC105032213	monothiol glutaredoxin-S3-like	mRNA	XP_010904892.1	.	NW_011550945.1:686309-687285	977	0	0	0	0	0	0	0	0	0	0	0	0	0	0	0	0	0	0	0	0	0	0	0	0	0	0	0	0	0	0
XM_010906592	105032214	LOC105032214	uncharacterized exonuclease domain-containing protein At3g15140, transcript variant X2	mRNA	XP_010904894.1	.	NW_011550945.1:709848-723701	1483	0	0	0	0	0	0	0	0	0	0	0	0	0	0	0	0	0	0	0	0	0	0	0	0	0	0	0	0	0	0
XM_010906591	105032214	LOC105032214	uncharacterized exonuclease domain-containing protein At3g15140, transcript variant X1	mRNA	XP_010904893.1	.	NW_011550945.1:709849-723701	1563	0	0	0	0	0	0	0	0	0	0	0	0	0	0	0	0	0	0	0	0	0	0	0	0	0	0	0	0	0	0
XM_010906594	105032215	LOC105032215	uncharacterized LOC105032215	mRNA	XP_010904896.1	.	NW_011550945.1:731502-734486	2985	0	0	0	0	0	0	0	0	0	0	0	0	0	0	0	0	0	0	0	0	0	0	0	0	0	0	0	0	0	0
XM_010906595	105032216	LOC105032216	guanylate-binding protein 4	mRNA	XP_010904897.1	.	NW_011550945.1:764453-790872	3810	0	0	0	0	0	0	0	0	0	0	0	0	0	0	0	0	0	0	0	0	0	0	0	0	0	0	0	0	0	0
XM_010906596	105032217	LOC105032217	receptor-like protein kinase HSL1, transcript variant X1	mRNA	XP_010904898.1	.	NW_011550945.1:806741-811361	3625	0	0	0	0	0	0	0	0	0	0	0	0	0	0	0	0	0	0	0	0	0	0	0	0	0	0	0	0	0	0
XR_829777	105032217	LOC105032217	receptor-like protein kinase HSL1, transcript variant X2	misc_RNA	.	.	NW_011550945.1:807174-811373	3301	0	0	0	0	0	0	0	0	0	0	0	0	0	0	0	0	0	0	0	0	0	0	0	0	0	0	0	0	0	0
XM_010906597	105032218	LOC105032218	protein DMP6	mRNA	XP_010904899.1	.	NW_011550945.1:891717-892692	976	0	0	0	0	0	0	0	0	0	0	0	0	0	0	0	0	0	0	0	0	0	0	0	0	0	0	0	0	0	0
XM_010906598	105032219	LOC105032219	dnaJ homolog subfamily B member 13	mRNA	XP_010904900.2	.	NW_011550945.1:924323-933749	1299	0	0	0	0	0	0	0	0	0	0	0	0	0	0	0	0	0	0	0	0	0	0	0	0	0	0	0	0	0	0
XM_010906599	105032220	LOC105032220	probable transcription factor GLK1	mRNA	XP_010904901.1	.	NW_011550945.1:1005575-1010008	1854	0	0	0	0	0	0	0	0	0	0	0	0	0	0	0	0	0	0	0	0	0	0	0	0	0	0	0	0	0	0
XM_010906602	105032221	LOC105032221	uncharacterized LOC105032221, transcript variant X1	mRNA	XP_010904904.1	.	NW_011550945.1:1047508-1069005	1355	0	0	0	0	0	0	0	0	0	0	0	0	0	0	0	0	0	0	0	0	0	0	0	0	0	0	0	0	0	0
XM_010906604	105032221	LOC105032221	uncharacterized LOC105032221, transcript variant X2	mRNA	XP_010904906.1	.	NW_011550945.1:1047508-1069005	1193	0	0	0	0	0	0	0	0	0	0	0	0	0	0	0	0	0	0	0	0	0	0	0	0	0	0	0	0	0	0
XM_010906606	105032222	LOC105032222	uncharacterized LOC105032222, transcript variant X2	mRNA	XP_010904908.1	.	NW_011550945.1:1086969-1093943	874	0	0	0	0	0	0	0	0	0	0	0	0	0	0	0	0	0	0	0	0	0	0	0	0	0	0	0	0	0	0
XM_010906605	105032222	LOC105032222	uncharacterized LOC105032222, transcript variant X1	mRNA	XP_010904907.1	.	NW_011550945.1:1091121-1093943	788	0	0	0	0	0	0	0	0	0	0	0	0	0	0	0	0	0	0	0	0	0	0	0	0	0	0	0	0	0	0
XM_010906607	105032222	LOC105032222	uncharacterized LOC105032222, transcript variant X3	mRNA	XP_010904909.1	.	NW_011550945.1:1091172-1093943	754	0	0	0	0	0	0	0	0	0	0	0	0	0	0	0	0	0	0	0	0	0	0	0	0	0	0	0	0	0	0
XM_010906608	105032223	LOC105032223	uncharacterized LOC105032223, transcript variant X1	mRNA	XP_010904910.1	.	NW_011550945.1:1084387-1089756	867	0	0	0	0	0	0	0	0	0	0	0	0	0	0	0	0	0	0	0	0	0	0	0	0	0	0	0	0	0	0
XR_003798693	105032223	LOC105032223	uncharacterized LOC105032223, transcript variant X2	misc_RNA	.	.	NW_011550945.1:1084387-1089756	874	0	0	0	0	0	0	0	0	0	0	0	0	0	0	0	0	0	0	0	0	0	0	0	0	0	0	0	0	0	0
XM_010906609	105032224	LOC105032224	nuclear cap-binding protein subunit 2	mRNA	XP_010904911.1	.	NW_011550945.1:1094103-1105088	1306	0	0	0	0	0	0	0	0	0	0	0	0	0	0	0	0	0	0	0	0	0	0	0	0	0	0	0	0	0	0
XM_010906613	105032225	LOC105032225	dynein light chain 2, cytoplasmic	mRNA	XP_010904915.2	.	chr1:61359580-61360009	327	3	1	0	0	0	0	0	0	0	1	0.313657	0.146799	0	0	0	0	0	0	0	0.075464	0.433675	0.205466	0	0	0	0	0	0	0	0.095025
XM_010906610	105032226	LOC105032226	uncharacterized protein At4g28440	mRNA	XP_010904912.1	.	NW_011550945.1:1111253-1111787	535	0	0	0	0	0	0	0	0	0	0	0	0	0	0	0	0	0	0	0	0	0	0	0	0	0	0	0	0	0	0
XM_010906611	105032227	LOC105032227	uncharacterized LOC105032227	mRNA	XP_010904913.1	.	NW_011550945.1:302037-302924	888	0	0	0	0	0	0	0	0	0	0	0	0	0	0	0	0	0	0	0	0	0	0	0	0	0	0	0	0	0	0
XM_010906612	105032228	LOC105032228	FT-interacting protein 7-like	mRNA	XP_010904914.1	.	NW_011550945.1:334665-344152	642	0	0	0	0	0	0	0	0	0	0	0	0	0	0	0	0	0	0	0	0	0	0	0	0	0	0	0	0	0	0
XM_010906648	105032229	LOC105032229	protein ROOT HAIR DEFECTIVE 3	mRNA	XP_010904950.1	.	chr1:4899406-4920836	3004	206	257	849	805	1067	194	254	942	714	229	3.48665	4.44665	62.6326	53.6118	57.2083	3.24826	3.80426	65.6352	54.0058	3.76156	4.82079	6.22374	117.379	92.5837	101.91	3.99048	4.99994	129.277	101.853	4.73662
XM_010906614	105032230	LOC105032230	LOB domain-containing protein 2-like	mRNA	XP_010904916.1	.	NW_011550945.1:587878-588633	756	0	0	0	0	0	0	0	0	0	0	0	0	0	0	0	0	0	0	0	0	0	0	0	0	0	0	0	0	0	0
XM_010906615	105032232	LOC105032232	NAC domain-containing protein 2	mRNA	XP_010904917.1	.	NW_011550945.1:757427-759656	1205	0	0	0	0	0	0	0	0	0	0	0	0	0	0	0	0	0	0	0	0	0	0	0	0	0	0	0	0	0	0
XM_019846220	105032235	LOC105032235	triose phosphate/phosphate translocator, chloroplastic	mRNA	XP_019701779.1	.	NW_011550945.1:902848-921288	2600	0	0	0	0	0	0	0	0	0	0	0	0	0	0	0	0	0	0	0	0	0	0	0	0	0	0	0	0	0	0
XM_010906620	105032236	LOC105032236	cyclic nucleotide-gated ion channel 4	mRNA	XP_010904922.2	.	chr1:61394104-61399589	2190	230	300	112	136	237	116	118	58	46	127	5.34954	7.11574	11.3117	12.4007	17.4176	2.66249	2.42338	5.52947	4.753	2.85794	7.39651	9.95952	21.1992	21.4151	31.0274	3.27087	3.18505	10.891	8.96399	3.59877
XM_010906618	105032237	LOC105032237	probable mitochondrial saccharopine dehydrogenase-like oxidoreductase At5g39410	mRNA	XP_010904920.1	.	NW_011550946.1:219951-224021	1622	0	0	0	0	0	0	0	0	0	0	0	0	0	0	0	0	0	0	0	0	0	0	0	0	0	0	0	0	0	0
XM_010906619	105032238	LOC105032238	uncharacterized LOC105032238	mRNA	XP_010904921.1	.	NW_011550946.1:245701-246453	753	0	0	0	0	0	0	0	0	0	0	0	0	0	0	0	0	0	0	0	0	0	0	0	0	0	0	0	0	0	0
XM_019846228	105032239	LOC105032239	uncharacterized LOC105032239, transcript variant X3	mRNA	XP_019701787.1	.	NW_011550946.1:249224-262762	3751	0	0	0	0	0	0	0	0	0	0	0	0	0	0	0	0	0	0	0	0	0	0	0	0	0	0	0	0	0	0
XM_010906622	105032239	LOC105032239	uncharacterized LOC105032239, transcript variant X2	mRNA	XP_010904924.1	.	NW_011550946.1:249224-263144	4079	0	0	0	0	0	0	0	0	0	0	0	0	0	0	0	0	0	0	0	0	0	0	0	0	0	0	0	0	0	0
XM_010906621	105032239	LOC105032239	uncharacterized LOC105032239, transcript variant X1	mRNA	XP_010904923.1	.	NW_011550946.1:249224-263145	3895	0	0	0	0	0	0	0	0	0	0	0	0	0	0	0	0	0	0	0	0	0	0	0	0	0	0	0	0	0	0
XM_010906623	105032240	LOC105032240	UPF0301 protein CHU_1773	mRNA	XP_010904925.1	.	NW_011550946.1:295320-297169	1160	0	0	0	0	0	0	0	0	0	0	0	0	0	0	0	0	0	0	0	0	0	0	0	0	0	0	0	0	0	0
gene-LOC105032241	105032241	LOC105032241	.	Gene	.	.	NW_011550946.1:315115-320729	3052	0	0	0	0	0	0	0	0	0	0	0	0	0	0	0	0	0	0	0	0	0	0	0	0	0	0	0	0	0	0
XM_010906625	105032242	LOC105032242	uncharacterized LOC105032242, transcript variant X1	mRNA	XP_010904927.1	.	NW_011550946.1:458681-463799	1601	0	0	0	0	0	0	0	0	0	0	0	0	0	0	0	0	0	0	0	0	0	0	0	0	0	0	0	0	0	0
XM_010906626	105032242	LOC105032242	uncharacterized LOC105032242, transcript variant X2	mRNA	XP_010904928.1	.	NW_011550946.1:458681-463799	1686	0	0	0	0	0	0	0	0	0	0	0	0	0	0	0	0	0	0	0	0	0	0	0	0	0	0	0	0	0	0
XM_010906627	105032242	LOC105032242	uncharacterized LOC105032242, transcript variant X3	mRNA	XP_010904929.1	.	NW_011550946.1:458681-463799	1888	0	0	0	0	0	0	0	0	0	0	0	0	0	0	0	0	0	0	0	0	0	0	0	0	0	0	0	0	0	0
XM_010906631	105032244	LOC105032244	cyclic nucleotide-gated ion channel 4	mRNA	XP_010904933.2	.	chr1:61407835-61412821	2400	0	0	107	58	71	0	0	23	20	0	0	0	9.87079	4.76965	4.71381	0	0	1.9964	1.84639	0	0	0	18.4987	8.23686	8.39708	0	0	3.93216	3.48224	0
XM_010906630	105032245	LOC105032245	probable ubiquitin conjugation factor E4	mRNA	XP_010904932.1	.	NW_011550946.1:601528-632362	3699	0	0	0	0	0	0	0	0	0	0	0	0	0	0	0	0	0	0	0	0	0	0	0	0	0	0	0	0	0	0
XM_010906632	105032246	LOC105032246	uncharacterized LOC105032246, transcript variant X1	mRNA	XP_010904934.1	.	NW_011550946.1:684854-689195	612	0	0	0	0	0	0	0	0	0	0	0	0	0	0	0	0	0	0	0	0	0	0	0	0	0	0	0	0	0	0
XM_010906633	105032246	LOC105032246	uncharacterized LOC105032246, transcript variant X3	mRNA	XP_010904935.1	.	NW_011550946.1:684854-689198	631	0	0	0	0	0	0	0	0	0	0	0	0	0	0	0	0	0	0	0	0	0	0	0	0	0	0	0	0	0	0
XM_029260962	105032246	LOC105032246	uncharacterized LOC105032246, transcript variant X2	mRNA	XP_029116795.1	.	NW_011550946.1:684854-692596	381	0	0	0	0	0	0	0	0	0	0	0	0	0	0	0	0	0	0	0	0	0	0	0	0	0	0	0	0	0	0
XM_010906634	105032247	LOC105032247	cyclic nucleotide-gated ion channel 2	mRNA	XP_010904936.1	.	NW_011550946.1:791687-801377	3231	0	0	0	0	0	0	0	0	0	0	0	0	0	0	0	0	0	0	0	0	0	0	0	0	0	0	0	0	0	0
XM_010906635	105032248	LOC105032248	uncharacterized LOC105032248	mRNA	XP_010904937.1	.	NW_011550946.1:821997-824590	1785	0	0	0	0	0	0	0	0	0	0	0	0	0	0	0	0	0	0	0	0	0	0	0	0	0	0	0	0	0	0
XM_010906636	105032249	LOC105032249	uncharacterized LOC105032249, transcript variant X1	mRNA	XP_010904938.1	.	NW_011550946.1:827918-843081	2678	0	0	0	0	0	0	0	0	0	0	0	0	0	0	0	0	0	0	0	0	0	0	0	0	0	0	0	0	0	0
XM_029260964	105032249	LOC105032249	uncharacterized LOC105032249, transcript variant X2	mRNA	XP_029116797.1	.	NW_011550946.1:828166-843081	2559	0	0	0	0	0	0	0	0	0	0	0	0	0	0	0	0	0	0	0	0	0	0	0	0	0	0	0	0	0	0
XM_019846225	105032249	LOC105032249	uncharacterized LOC105032249, transcript variant X3	mRNA	XP_019701784.1	.	NW_011550946.1:828619-843081	2458	0	0	0	0	0	0	0	0	0	0	0	0	0	0	0	0	0	0	0	0	0	0	0	0	0	0	0	0	0	0
XM_029260968	105032250	LOC105032250	remorin 4.2-like	mRNA	XP_029116801.1	.	NW_011550946.1:859194-863231	1511	0	0	0	0	0	0	0	0	0	0	0	0	0	0	0	0	0	0	0	0	0	0	0	0	0	0	0	0	0	0
XM_029260967	105032251	LOC105032251	EID1-like F-box protein 2, transcript variant X8	mRNA	XP_029116800.1	.	NW_011550946.1:856294-862100	1477	0	0	0	0	0	0	0	0	0	0	0	0	0	0	0	0	0	0	0	0	0	0	0	0	0	0	0	0	0	0
XM_029260966	105032251	LOC105032251	EID1-like F-box protein 2, transcript variant X7	mRNA	XP_029116799.1	.	NW_011550946.1:856294-863666	1777	0	0	0	0	0	0	0	0	0	0	0	0	0	0	0	0	0	0	0	0	0	0	0	0	0	0	0	0	0	0
XM_029260965	105032251	LOC105032251	EID1-like F-box protein 2, transcript variant X6	mRNA	XP_029116798.1	.	NW_011550946.1:856295-862265	1596	0	0	0	0	0	0	0	0	0	0	0	0	0	0	0	0	0	0	0	0	0	0	0	0	0	0	0	0	0	0
XM_010906639	105032251	LOC105032251	EID1-like F-box protein 2, transcript variant X1	mRNA	XP_010904941.1	.	NW_011550946.1:856303-863666	1809	0	0	0	0	0	0	0	0	0	0	0	0	0	0	0	0	0	0	0	0	0	0	0	0	0	0	0	0	0	0
XM_010906640	105032251	LOC105032251	EID1-like F-box protein 2, transcript variant X2	mRNA	XP_010904942.1	.	NW_011550946.1:856303-863666	1787	0	0	0	0	0	0	0	0	0	0	0	0	0	0	0	0	0	0	0	0	0	0	0	0	0	0	0	0	0	0
XM_010906642	105032251	LOC105032251	EID1-like F-box protein 2, transcript variant X5	mRNA	XP_010904944.1	.	NW_011550946.1:856303-863666	1805	0	0	0	0	0	0	0	0	0	0	0	0	0	0	0	0	0	0	0	0	0	0	0	0	0	0	0	0	0	0
XM_010906641	105032251	LOC105032251	EID1-like F-box protein 2, transcript variant X4	mRNA	XP_010904943.1	.	NW_011550946.1:856304-863666	1635	0	0	0	0	0	0	0	0	0	0	0	0	0	0	0	0	0	0	0	0	0	0	0	0	0	0	0	0	0	0
XM_010906644	105032251	LOC105032251	EID1-like F-box protein 2, transcript variant X3	mRNA	XP_010904946.1	.	NW_011550946.1:856305-863666	1568	0	0	0	0	0	0	0	0	0	0	0	0	0	0	0	0	0	0	0	0	0	0	0	0	0	0	0	0	0	0
XM_010906643	105032252	LOC105032252	external alternative NAD(P)H-ubiquinone oxidoreductase B3, mitochondrial	mRNA	XP_010904945.1	.	chr1:61417474-61427857	2450	0	0	0	0	0	0	0	0	0	0	0	0	0	0	0	0	0	0	0	0	0	0	0	0	0	0	0	0	0	0
XM_029260960	105032253	LOC105032253	heparanase-like protein 1	mRNA	XP_029116793.1	.	NW_011550946.1:875982-879364	1632	0	0	0	0	0	0	0	0	0	0	0	0	0	0	0	0	0	0	0	0	0	0	0	0	0	0	0	0	0	0
XM_010906649	105032254	LOC105032254	probable galacturonosyltransferase 14, transcript variant X1	mRNA	XP_010904951.1	.	NW_011550946.1:935843-952093	2464	0	0	0	0	0	0	0	0	0	0	0	0	0	0	0	0	0	0	0	0	0	0	0	0	0	0	0	0	0	0
XM_010906650	105032254	LOC105032254	probable galacturonosyltransferase 14, transcript variant X2	mRNA	XP_010904952.1	.	NW_011550946.1:935843-952093	2461	0	0	0	0	0	0	0	0	0	0	0	0	0	0	0	0	0	0	0	0	0	0	0	0	0	0	0	0	0	0
XM_010906651	105032255	LOC105032255	probable leucine-rich repeat receptor-like protein kinase At1g35710	mRNA	XP_010904953.1	.	NW_011550946.1:987225-997377	1467	0	0	0	0	0	0	0	0	0	0	0	0	0	0	0	0	0	0	0	0	0	0	0	0	0	0	0	0	0	0
XM_010906652	105032256	LOC105032256	uncharacterized LOC105032256	mRNA	XP_010904954.1	.	NW_011550946.1:1055192-1062320	2126	0	0	0	0	0	0	0	0	0	0	0	0	0	0	0	0	0	0	0	0	0	0	0	0	0	0	0	0	0	0
XM_010906657	105032257	LOC105032257	F-box protein SKIP27	mRNA	XP_010904959.1	.	chr1:61455429-61457111	1038	0	0	0	0	0	0	0	2	2	0	0	0	0	0	0	0	0	0.244634	0.374255	0	0	0	0	0	0	0	0	0.481838	0.705832	0
XM_010906655	105032258	LOC105032258	SNAP25 homologous protein SNAP33, transcript variant X1	mRNA	XP_010904957.1	.	NW_011550946.1:1066336-1073881	1458	0	0	0	0	0	0	0	0	0	0	0	0	0	0	0	0	0	0	0	0	0	0	0	0	0	0	0	0	0	0
XM_010906654	105032258	LOC105032258	SNAP25 homologous protein SNAP33, transcript variant X2	mRNA	XP_010904956.2	.	NW_011550946.1:1066336-1073883	1463	0	0	0	0	0	0	0	0	0	0	0	0	0	0	0	0	0	0	0	0	0	0	0	0	0	0	0	0	0	0
XM_010906656	105032259	LOC105032259	probable WRKY transcription factor 51	mRNA	XP_010904958.1	.	NW_011550946.1:1118523-1122926	1124	0	0	0	0	0	0	0	0	0	0	0	0	0	0	0	0	0	0	0	0	0	0	0	0	0	0	0	0	0	0
XM_010906658	105032260	LOC105032260	uncharacterized LOC105032260	mRNA	XP_010904960.1	.	NW_011550946.1:1131578-1146192	1470	0	0	0	0	0	0	0	0	0	0	0	0	0	0	0	0	0	0	0	0	0	0	0	0	0	0	0	0	0	0
XM_010906659	105032261	LOC105032261	zinc finger protein ZAT9-like	mRNA	XP_010904961.1	.	NW_011550946.1:1151194-1152986	1793	0	0	0	0	0	0	0	0	0	0	0	0	0	0	0	0	0	0	0	0	0	0	0	0	0	0	0	0	0	0
XM_010906660	105032262	LOC105032262	putative disease resistance protein At3g14460	mRNA	XP_010904962.1	.	NW_011550946.1:482520-484061	1329	0	0	0	0	0	0	0	0	0	0	0	0	0	0	0	0	0	0	0	0	0	0	0	0	0	0	0	0	0	0
XM_010906662	105032264	LOC105032264	transcription termination factor MTERF8, chloroplastic	mRNA	XP_010904964.1	.	NW_011550947.1:225246-226862	1617	0	0	0	0	0	0	0	0	0	0	0	0	0	0	0	0	0	0	0	0	0	0	0	0	0	0	0	0	0	0
XM_010906663	105032265	LOC105032265	transcription termination factor MTERF2, chloroplastic, transcript variant X2	mRNA	XP_010904965.1	.	NW_011550947.1:249487-253244	1591	0	0	0	0	0	0	0	0	0	0	0	0	0	0	0	0	0	0	0	0	0	0	0	0	0	0	0	0	0	0
XM_019846231	105032265	LOC105032265	transcription termination factor MTERF2, chloroplastic, transcript variant X1	mRNA	XP_019701790.1	.	NW_011550947.1:249840-253244	1390	0	0	0	0	0	0	0	0	0	0	0	0	0	0	0	0	0	0	0	0	0	0	0	0	0	0	0	0	0	0
XM_010906667	105032266	LOC105032266	NDR1/HIN1-like protein 2	mRNA	XP_010904969.1	.	chr1:61463599-61465217	929	0	0	0	0	0	0	0	0	0	0	0	0	0	0	0	0	0	0	0	0	0	0	0	0	0	0	0	0	0	0
XM_029260970	105032267	LOC105032267	transcription initiation factor TFIID subunit 1, transcript variant X1	mRNA	XP_029116803.1	.	NW_011550947.1:379327-423965	6287	0	0	0	0	0	0	0	0	0	0	0	0	0	0	0	0	0	0	0	0	0	0	0	0	0	0	0	0	0	0
XM_010906664	105032267	LOC105032267	transcription initiation factor TFIID subunit 1, transcript variant X2	mRNA	XP_010904966.1	.	NW_011550947.1:379328-423965	6274	0	0	0	0	0	0	0	0	0	0	0	0	0	0	0	0	0	0	0	0	0	0	0	0	0	0	0	0	0	0
XM_010906665	105032268	LOC105032268	ADP-ribosylation factor 2	mRNA	XP_010904967.1	.	NW_011550947.1:525654-532262	1046	0	0	0	0	0	0	0	0	0	0	0	0	0	0	0	0	0	0	0	0	0	0	0	0	0	0	0	0	0	0
XM_010906666	105032269	LOC105032269	geranylgeranyl diphosphate reductase, chloroplastic	mRNA	XP_010904968.1	.	NW_011550947.1:557744-559442	1679	0	0	0	0	0	0	0	0	0	0	0	0	0	0	0	0	0	0	0	0	0	0	0	0	0	0	0	0	0	0
XM_010906668	105032270	LOC105032270	embryonic protein DC-8, transcript variant X1	mRNA	XP_010904970.1	.	NW_011550947.1:814384-816341	1778	0	0	0	0	0	0	0	0	0	0	0	0	0	0	0	0	0	0	0	0	0	0	0	0	0	0	0	0	0	0
XM_010906669	105032270	LOC105032270	embryonic protein DC-8, transcript variant X2	mRNA	XP_010904971.1	.	NW_011550947.1:814384-816341	1772	0	0	0	0	0	0	0	0	0	0	0	0	0	0	0	0	0	0	0	0	0	0	0	0	0	0	0	0	0	0
XM_010906670	105032271	LOC105032271	probable ADP-ribosylation factor GTPase-activating protein AGD14, transcript variant X1	mRNA	XP_010904972.1	.	NW_011550947.1:965298-983184	2737	0	0	0	0	0	0	0	0	0	0	0	0	0	0	0	0	0	0	0	0	0	0	0	0	0	0	0	0	0	0
XM_010906671	105032271	LOC105032271	probable ADP-ribosylation factor GTPase-activating protein AGD14, transcript variant X2	mRNA	XP_010904973.1	.	NW_011550947.1:965298-983184	2625	0	0	0	0	0	0	0	0	0	0	0	0	0	0	0	0	0	0	0	0	0	0	0	0	0	0	0	0	0	0
XM_010906672	105032271	LOC105032271	probable ADP-ribosylation factor GTPase-activating protein AGD14, transcript variant X3	mRNA	XP_010904974.1	.	NW_011550947.1:965298-983184	2605	0	0	0	0	0	0	0	0	0	0	0	0	0	0	0	0	0	0	0	0	0	0	0	0	0	0	0	0	0	0
XM_010906673	105032272	LOC105032272	chaperone protein dnaJ 20, chloroplastic	mRNA	XP_010904975.1	.	NW_011550947.1:1273474-1274521	962	0	0	0	0	0	0	0	0	0	0	0	0	0	0	0	0	0	0	0	0	0	0	0	0	0	0	0	0	0	0
gene-LOC105032274	105032274	LOC105032274	.	Gene	.	.	NW_011550947.1:884588-947829	645	0	0	0	0	0	0	0	0	0	0	0	0	0	0	0	0	0	0	0	0	0	0	0	0	0	0	0	0	0	0
XM_010906678	105032275	LOC105032275	uncharacterized LOC105032275	mRNA	XP_010904980.1	.	chr1:61476503-61478736	1209	0	0	0	0	0	0	0	0	0	0	0	0	0	0	0	0	0	0	0	0	0	0	0	0	0	0	0	0	0	0
XM_010906674	105032276	LOC105032276	auxin-responsive protein IAA20, transcript variant X2	mRNA	XP_010904976.1	.	NW_011550948.1:122348-124415	1050	0	0	0	0	0	0	0	0	0	0	0	0	0	0	0	0	0	0	0	0	0	0	0	0	0	0	0	0	0	0
XM_019846232	105032276	LOC105032276	auxin-responsive protein IAA20, transcript variant X1	mRNA	XP_019701791.1	.	NW_011550948.1:122374-124415	1030	0	0	0	0	0	0	0	0	0	0	0	0	0	0	0	0	0	0	0	0	0	0	0	0	0	0	0	0	0	0
XM_010906677	105032277	LOC105032277	putative glycerol-3-phosphate transporter 5, transcript variant X2	mRNA	XP_010904979.1	.	NW_011550948.1:165737-176806	2200	0	0	0	0	0	0	0	0	0	0	0	0	0	0	0	0	0	0	0	0	0	0	0	0	0	0	0	0	0	0
XM_010906679	105032277	LOC105032277	putative glycerol-3-phosphate transporter 5, transcript variant X3	mRNA	XP_010904981.1	.	NW_011550948.1:165737-176806	2090	0	0	0	0	0	0	0	0	0	0	0	0	0	0	0	0	0	0	0	0	0	0	0	0	0	0	0	0	0	0
XM_010906676	105032277	LOC105032277	putative glycerol-3-phosphate transporter 5, transcript variant X1	mRNA	XP_010904978.1	.	NW_011550948.1:165738-176795	2163	0	0	0	0	0	0	0	0	0	0	0	0	0	0	0	0	0	0	0	0	0	0	0	0	0	0	0	0	0	0
XM_010906683	105032278	LOC105032278	probable protein phosphatase 2C 27, transcript variant X3	mRNA	XP_010904985.1	.	NW_011550948.1:201410-210669	1453	0	0	0	0	0	0	0	0	0	0	0	0	0	0	0	0	0	0	0	0	0	0	0	0	0	0	0	0	0	0
XM_029260971	105032278	LOC105032278	probable protein phosphatase 2C 27, transcript variant X2	mRNA	XP_029116804.1	.	NW_011550948.1:201423-210375	1549	0	0	0	0	0	0	0	0	0	0	0	0	0	0	0	0	0	0	0	0	0	0	0	0	0	0	0	0	0	0
XM_010906682	105032278	LOC105032278	probable protein phosphatase 2C 27, transcript variant X1	mRNA	XP_010904984.1	.	NW_011550948.1:201424-210669	1640	0	0	0	0	0	0	0	0	0	0	0	0	0	0	0	0	0	0	0	0	0	0	0	0	0	0	0	0	0	0
XM_029260973	105032279	LOC105032279	pentatricopeptide repeat-containing protein At1g80550, mitochondrial, transcript variant X5	mRNA	XP_029116806.1	.	NW_011550948.1:212680-216260	1758	0	0	0	0	0	0	0	0	0	0	0	0	0	0	0	0	0	0	0	0	0	0	0	0	0	0	0	0	0	0
XM_010906684	105032279	LOC105032279	pentatricopeptide repeat-containing protein At1g80550, mitochondrial, transcript variant X1	mRNA	XP_010904986.1	.	NW_011550948.1:212680-217927	3104	0	0	0	0	0	0	0	0	0	0	0	0	0	0	0	0	0	0	0	0	0	0	0	0	0	0	0	0	0	0
XM_010906685	105032279	LOC105032279	pentatricopeptide repeat-containing protein At1g80550, mitochondrial, transcript variant X4	mRNA	XP_010904987.1	.	NW_011550948.1:212680-217927	2298	0	0	0	0	0	0	0	0	0	0	0	0	0	0	0	0	0	0	0	0	0	0	0	0	0	0	0	0	0	0
XM_010906686	105032279	LOC105032279	pentatricopeptide repeat-containing protein At1g80550, mitochondrial, transcript variant X3	mRNA	XP_010904988.1	.	NW_011550948.1:212680-217927	3060	0	0	0	0	0	0	0	0	0	0	0	0	0	0	0	0	0	0	0	0	0	0	0	0	0	0	0	0	0	0
XM_029260972	105032279	LOC105032279	pentatricopeptide repeat-containing protein At1g80550, mitochondrial, transcript variant X2	mRNA	XP_029116805.1	.	NW_011550948.1:212680-217927	3101	0	0	0	0	0	0	0	0	0	0	0	0	0	0	0	0	0	0	0	0	0	0	0	0	0	0	0	0	0	0
XM_029260893	105032280	LOC105032280	F-box/LRR-repeat protein At3g26922-like	mRNA	XP_029116726.1	.	chr1:61551142-61553529	1904	0	0	7	5	0	0	0	0	0	0	0	0	0.708408	0.478493	0	0	0	0	0	0	0	0	1.32762	0.826324	0	0	0	0	0	0
XM_010906689	105032282	LOC105032282	40S ribosomal protein S11, transcript variant X1	mRNA	XP_010904991.1	.	NW_011550948.1:220072-226991	963	0	0	0	0	0	0	0	0	0	0	0	0	0	0	0	0	0	0	0	0	0	0	0	0	0	0	0	0	0	0
XM_010906690	105032282	LOC105032282	40S ribosomal protein S11, transcript variant X2	mRNA	XP_010904992.1	.	NW_011550948.1:220607-226992	707	0	0	0	0	0	0	0	0	0	0	0	0	0	0	0	0	0	0	0	0	0	0	0	0	0	0	0	0	0	0
XM_010906692	105032283	LOC105032283	uncharacterized LOC105032283	mRNA	XP_010904994.1	.	NW_011550948.1:243780-245737	1281	0	0	0	0	0	0	0	0	0	0	0	0	0	0	0	0	0	0	0	0	0	0	0	0	0	0	0	0	0	0
XR_829780	105032284	LOC105032284	uncharacterized LOC105032284	ncRNA	.	.	NW_011550948.1:528971-547625	805	0	0	0	0	0	0	0	0	0	0	0	0	0	0	0	0	0	0	0	0	0	0	0	0	0	0	0	0	0	0
XM_010906693	105032285	LOC105032285	putative UPF0481 protein At3g02645	mRNA	XP_010904995.1	.	NW_011550948.1:613592-615677	1950	0	0	0	0	0	0	0	0	0	0	0	0	0	0	0	0	0	0	0	0	0	0	0	0	0	0	0	0	0	0
XM_010906694	105032286	LOC105032286	putative UPF0481 protein At3g02645	mRNA	XP_010904996.1	.	NW_011550948.1:865602-867687	1963	0	0	0	0	0	0	0	0	0	0	0	0	0	0	0	0	0	0	0	0	0	0	0	0	0	0	0	0	0	0
XM_010906695	105032287	LOC105032287	putative UPF0481 protein At3g02645	mRNA	XP_010904997.1	.	NW_011550948.1:940866-952865	3090	0	0	0	0	0	0	0	0	0	0	0	0	0	0	0	0	0	0	0	0	0	0	0	0	0	0	0	0	0	0
XM_029260974	105032288	LOC105032288	auxin response factor 15-like	mRNA	XP_029116807.1	.	NW_011550948.1:911881-917165	977	0	0	0	0	0	0	0	0	0	0	0	0	0	0	0	0	0	0	0	0	0	0	0	0	0	0	0	0	0	0
XM_010906697	105032289	LOC105032289	putative UPF0481 protein At3g02645	mRNA	XP_010904999.1	.	NW_011550948.1:1083372-1085266	1811	0	0	0	0	0	0	0	0	0	0	0	0	0	0	0	0	0	0	0	0	0	0	0	0	0	0	0	0	0	0
XR_829781	105032290	LOC105032290	uncharacterized LOC105032290	ncRNA	.	.	chr1:61559043-61569613	836	0	0	0	0	0	0	0	0	0	0	0	0	0	0	0	0	0	0	0	0	0	0	0	0	0	0	0	0	0	0
XM_019846235	105032291	LOC105032291	uncharacterized LOC105032291	mRNA	XP_019701794.1	.	NW_011550948.1:592630-593933	884	0	0	0	0	0	0	0	0	0	0	0	0	0	0	0	0	0	0	0	0	0	0	0	0	0	0	0	0	0	0
XM_010906699	105032292	LOC105032292	putative UPF0481 protein At3g02645	mRNA	XP_010905001.3	.	NW_011550948.1:776807-783972	1493	0	0	0	0	0	0	0	0	0	0	0	0	0	0	0	0	0	0	0	0	0	0	0	0	0	0	0	0	0	0
XM_010906700	105032293	LOC105032293	rac-like GTP-binding protein ARAC5	mRNA	XP_010905002.2	.	NW_011550948.1:845453-859448	408	0	0	0	0	0	0	0	0	0	0	0	0	0	0	0	0	0	0	0	0	0	0	0	0	0	0	0	0	0	0
XM_010906701	105032294	LOC105032294	glycine-rich cell wall structural protein 1-like	mRNA	XP_010905003.1	.	NW_011550948.1:872099-872545	447	0	0	0	0	0	0	0	0	0	0	0	0	0	0	0	0	0	0	0	0	0	0	0	0	0	0	0	0	0	0
gene-LOC105032295	105032295	LOC105032295	.	Gene	.	.	NW_011550948.1:1011661-1019205	1725	0	0	0	0	0	0	0	0	0	0	0	0	0	0	0	0	0	0	0	0	0	0	0	0	0	0	0	0	0	0
XM_029260975	105032296	LOC105032296	protein YABBY 2	mRNA	XP_029116808.1	.	NW_011550949.1:490760-502273	910	0	0	0	0	0	0	0	0	0	0	0	0	0	0	0	0	0	0	0	0	0	0	0	0	0	0	0	0	0	0
XM_010906707	105032297	LOC105032297	F-box/FBD/LRR-repeat protein At1g16930-like	mRNA	XP_010905009.2	.	chr1:61625825-61627824	1694	0	0	0	0	0	0	0	0	0	0	0	0	0	0	0	0	0	0	0	0	0	0	0	0	0	0	0	0	0	0
XR_829782	105032298	LOC105032298	uncharacterized LOC105032298	ncRNA	.	.	NW_011550949.1:1147527-1149194	831	0	0	0	0	0	0	0	0	0	0	0	0	0	0	0	0	0	0	0	0	0	0	0	0	0	0	0	0	0	0
XM_010906703	105032299	LOC105032299	pentatricopeptide repeat-containing protein At4g13650, transcript variant X1	mRNA	XP_010905005.1	.	NW_011550949.1:1356418-1363411	4006	0	0	0	0	0	0	0	0	0	0	0	0	0	0	0	0	0	0	0	0	0	0	0	0	0	0	0	0	0	0
XM_010906704	105032299	LOC105032299	pentatricopeptide repeat-containing protein At4g13650, transcript variant X3	mRNA	XP_010905006.1	.	NW_011550949.1:1356418-1363412	4002	0	0	0	0	0	0	0	0	0	0	0	0	0	0	0	0	0	0	0	0	0	0	0	0	0	0	0	0	0	0
XM_010906706	105032299	LOC105032299	pentatricopeptide repeat-containing protein At4g13650, transcript variant X4	mRNA	XP_010905008.1	.	NW_011550949.1:1356418-1363413	3975	0	0	0	0	0	0	0	0	0	0	0	0	0	0	0	0	0	0	0	0	0	0	0	0	0	0	0	0	0	0
XM_010906705	105032299	LOC105032299	pentatricopeptide repeat-containing protein At4g13650, transcript variant X2	mRNA	XP_010905007.1	.	NW_011550949.1:1356426-1363411	4009	0	0	0	0	0	0	0	0	0	0	0	0	0	0	0	0	0	0	0	0	0	0	0	0	0	0	0	0	0	0
XM_010906708	105032300	LOC105032300	uncharacterized LOC105032300	mRNA	XP_010905010.1	.	NW_011550949.1:667396-667770	375	0	0	0	0	0	0	0	0	0	0	0	0	0	0	0	0	0	0	0	0	0	0	0	0	0	0	0	0	0	0
XM_010906710	105032302	LOC105032302	putative disease resistance protein RGA4	mRNA	XP_010905012.1	.	NW_011550950.1:180918-184951	4034	0	0	0	0	0	0	0	0	0	0	0	0	0	0	0	0	0	0	0	0	0	0	0	0	0	0	0	0	0	0
XR_829783	105032303	LOC105032303	uncharacterized LOC105032303	ncRNA	.	.	NW_011550950.1:225167-226395	1029	0	0	0	0	0	0	0	0	0	0	0	0	0	0	0	0	0	0	0	0	0	0	0	0	0	0	0	0	0	0
XM_029260981	105032304	LOC105032304	ABC transporter B family member 4, transcript variant X2	mRNA	XP_029116814.1	.	NW_011550950.1:242952-251164	3461	0	0	0	0	0	0	0	0	0	0	0	0	0	0	0	0	0	0	0	0	0	0	0	0	0	0	0	0	0	0
XM_010906713	105032304	LOC105032304	ABC transporter B family member 4, transcript variant X1	mRNA	XP_010905015.1	.	NW_011550950.1:242952-252606	4379	0	0	0	0	0	0	0	0	0	0	0	0	0	0	0	0	0	0	0	0	0	0	0	0	0	0	0	0	0	0
XR_003798663	105032305	LOC105032305	uncharacterized LOC105032305, transcript variant X1	ncRNA	.	.	chr1:61662431-61665897	2752	0	0	0	0	0	0	0	0	0	0	0	0	0	0	0	0	0	0	0	0	0	0	0	0	0	0	0	0	0	0
XR_003798665	105032305	LOC105032305	uncharacterized LOC105032305, transcript variant X2	ncRNA	.	.	chr1:61662431-61665897	1102	0	0	0	0	0	0	0	0	0	0	0	0	0	0	0	0	0	0	0	0	0	0	0	0	0	0	0	0	0	0
XR_003798666	105032305	LOC105032305	uncharacterized LOC105032305, transcript variant X3	ncRNA	.	.	chr1:61662431-61665897	2813	0	0	0	0	0	0	0	0	0	0	0	0	0	0	0	0	0	0	0	0	0	0	0	0	0	0	0	0	0	0
XR_003798667	105032305	LOC105032305	uncharacterized LOC105032305, transcript variant X4	ncRNA	.	.	chr1:61662431-61665897	1070	0	0	0	0	0	0	0	0	0	0	0	0	0	0	0	0	0	0	0	0	0	0	0	0	0	0	0	0	0	0
XR_003798668	105032305	LOC105032305	uncharacterized LOC105032305, transcript variant X5	ncRNA	.	.	chr1:61662431-61665897	994	0	0	0	0	0	0	0	0	0	0	0	0	0	0	0	0	0	0	0	0	0	0	0	0	0	0	0	0	0	0
XR_003798669	105032305	LOC105032305	uncharacterized LOC105032305, transcript variant X6	ncRNA	.	.	chr1:61662431-61665897	2737	0	0	0	0	0	0	0	0	0	0	0	0	0	0	0	0	0	0	0	0	0	0	0	0	0	0	0	0	0	0
XR_003798670	105032305	LOC105032305	uncharacterized LOC105032305, transcript variant X7	ncRNA	.	.	chr1:61662431-61666643	936	0	0	0	0	0	0	0	0	0	0	0	0	0	0	0	0	0	0	0	0	0	0	0	0	0	0	0	0	0	0
XM_010906716	105032306	LOC105032306	ABC transporter B family member 4, transcript variant X1	mRNA	XP_010905018.3	.	NW_011550950.1:462111-476224	4225	0	0	0	0	0	0	0	0	0	0	0	0	0	0	0	0	0	0	0	0	0	0	0	0	0	0	0	0	0	0
XM_029260982	105032306	LOC105032306	ABC transporter B family member 4, transcript variant X2	mRNA	XP_029116815.1	.	NW_011550950.1:462111-476224	3850	0	0	0	0	0	0	0	0	0	0	0	0	0	0	0	0	0	0	0	0	0	0	0	0	0	0	0	0	0	0
XM_029260983	105032306	LOC105032306	ABC transporter B family member 4, transcript variant X3	mRNA	XP_029116816.1	.	NW_011550950.1:462111-476224	3918	0	0	0	0	0	0	0	0	0	0	0	0	0	0	0	0	0	0	0	0	0	0	0	0	0	0	0	0	0	0
XM_010906717	105032307	LOC105032307	heat shock 70 kDa protein	mRNA	XP_010905019.1	.	NW_011550950.1:627870-630311	2442	0	0	0	0	0	0	0	0	0	0	0	0	0	0	0	0	0	0	0	0	0	0	0	0	0	0	0	0	0	0
XM_010906718	105032308	LOC105032308	eukaryotic translation initiation factor	mRNA	XP_010905020.1	.	NW_011550950.1:640765-652152	2943	0	0	0	0	0	0	0	0	0	0	0	0	0	0	0	0	0	0	0	0	0	0	0	0	0	0	0	0	0	0
XM_010906721	105032309	LOC105032309	translation initiation factor IF3-2, chloroplastic, transcript variant X2	mRNA	XP_010905023.1	.	NW_011550950.1:671814-682381	1443	0	0	0	0	0	0	0	0	0	0	0	0	0	0	0	0	0	0	0	0	0	0	0	0	0	0	0	0	0	0
XM_010906719	105032309	LOC105032309	translation initiation factor IF3-2, chloroplastic, transcript variant X1	mRNA	XP_010905021.1	.	NW_011550950.1:671820-682381	1603	0	0	0	0	0	0	0	0	0	0	0	0	0	0	0	0	0	0	0	0	0	0	0	0	0	0	0	0	0	0
XM_010906756	105032310	LOC105032310	transmembrane protein 258	mRNA	XP_010905058.1	.	chr1:4922251-4927523	763	0	0	0	0	0	0	0	0	0	0	0	0	0	0	0	0	0	0	0	0	0	0	0	0	0	0	0	0	0	0
XR_829785	105032311	LOC105032311	uncharacterized LOC105032311	ncRNA	.	.	chr1:61666955-61667883	831	0	0	0	0	0	0	0	0	0	0	0	0	0	0	0	0	0	0	0	0	0	0	0	0	0	0	0	0	0	0
XM_010906722	105032312	LOC105032312	cellulose synthase A catalytic subunit 9 [UDP-forming]	mRNA	XP_010905024.1	.	NW_011550950.1:684992-690656	3373	0	0	0	0	0	0	0	0	0	0	0	0	0	0	0	0	0	0	0	0	0	0	0	0	0	0	0	0	0	0
XM_010906724	105032313	LOC105032313	pentatricopeptide repeat-containing protein At4g30700	mRNA	XP_010905026.2	.	NW_011550950.1:716218-718811	2592	0	0	0	0	0	0	0	0	0	0	0	0	0	0	0	0	0	0	0	0	0	0	0	0	0	0	0	0	0	0
XM_010906726	105032314	LOC105032314	AUGMIN subunit 8, transcript variant X3	mRNA	XP_010905028.1	.	NW_011550950.1:725480-741067	3931	0	0	0	0	0	0	0	0	0	0	0	0	0	0	0	0	0	0	0	0	0	0	0	0	0	0	0	0	0	0
XM_029260984	105032314	LOC105032314	AUGMIN subunit 8, transcript variant X4	mRNA	XP_029116817.1	.	NW_011550950.1:725480-741328	3029	0	0	0	0	0	0	0	0	0	0	0	0	0	0	0	0	0	0	0	0	0	0	0	0	0	0	0	0	0	0
XM_019846250	105032314	LOC105032314	AUGMIN subunit 8, transcript variant X2	mRNA	XP_019701809.1	.	NW_011550950.1:725480-741332	3162	0	0	0	0	0	0	0	0	0	0	0	0	0	0	0	0	0	0	0	0	0	0	0	0	0	0	0	0	0	0
XM_010906725	105032314	LOC105032314	AUGMIN subunit 8, transcript variant X1	mRNA	XP_010905027.1	.	NW_011550950.1:725480-741350	3164	0	0	0	0	0	0	0	0	0	0	0	0	0	0	0	0	0	0	0	0	0	0	0	0	0	0	0	0	0	0
XM_029260985	105032314	LOC105032314	AUGMIN subunit 8, transcript variant X5	mRNA	XP_029116818.1	.	NW_011550950.1:736944-741350	2141	0	0	0	0	0	0	0	0	0	0	0	0	0	0	0	0	0	0	0	0	0	0	0	0	0	0	0	0	0	0
XM_010906728	105032315	LOC105032315	phospholipid hydroperoxide glutathione peroxidase 1, chloroplastic	mRNA	XP_010905030.1	.	NW_011550950.1:757676-763251	1196	0	0	0	0	0	0	0	0	0	0	0	0	0	0	0	0	0	0	0	0	0	0	0	0	0	0	0	0	0	0
XR_003798675	105032316	LOC105032316	uncharacterized LOC105032316, transcript variant X1	ncRNA	.	.	chr1:61673270-61680784	4628	0	0	0	0	0	0	0	0	0	0	0	0	0	0	0	0	0	0	0	0	0	0	0	0	0	0	0	0	0	0
XR_003798676	105032316	LOC105032316	uncharacterized LOC105032316, transcript variant X2	ncRNA	.	.	chr1:61673270-61680784	4551	0	0	0	0	0	0	0	0	0	0	0	0	0	0	0	0	0	0	0	0	0	0	0	0	0	0	0	0	0	0
XM_010906729	105032317	LOC105032317	uncharacterized LOC105032317	mRNA	XP_010905031.1	.	NW_011550950.1:766504-770957	765	0	0	0	0	0	0	0	0	0	0	0	0	0	0	0	0	0	0	0	0	0	0	0	0	0	0	0	0	0	0
XM_010906731	105032318	LOC105032318	putative leucine-rich repeat receptor-like serine/threonine-protein kinase At2g24130, transcript variant X2	mRNA	XP_010905033.3	.	NW_011550950.1:774286-783815	2029	0	0	0	0	0	0	0	0	0	0	0	0	0	0	0	0	0	0	0	0	0	0	0	0	0	0	0	0	0	0
XM_029260986	105032318	LOC105032318	putative leucine-rich repeat receptor-like serine/threonine-protein kinase At2g24130, transcript variant X1	mRNA	XP_029116819.1	.	NW_011550950.1:780227-783815	2216	0	0	0	0	0	0	0	0	0	0	0	0	0	0	0	0	0	0	0	0	0	0	0	0	0	0	0	0	0	0
XM_010906733	105032319	LOC105032319	uncharacterized LOC105032319, transcript variant X1	mRNA	XP_010905035.1	.	NW_011550950.1:774848-778343	3136	0	0	0	0	0	0	0	0	0	0	0	0	0	0	0	0	0	0	0	0	0	0	0	0	0	0	0	0	0	0
XM_010906734	105032319	LOC105032319	uncharacterized LOC105032319, transcript variant X2	mRNA	XP_010905036.1	.	NW_011550950.1:774849-778343	3132	0	0	0	0	0	0	0	0	0	0	0	0	0	0	0	0	0	0	0	0	0	0	0	0	0	0	0	0	0	0
XM_010906735	105032320	LOC105032320	pentatricopeptide repeat-containing protein At4g30825, chloroplastic	mRNA	XP_010905037.1	.	NW_011550950.1:869337-873249	3563	0	0	0	0	0	0	0	0	0	0	0	0	0	0	0	0	0	0	0	0	0	0	0	0	0	0	0	0	0	0
XM_010906740	105032321	LOC105032321	chlorophyll a-b binding protein 13, chloroplastic	mRNA	XP_010905042.1	.	chr1:61694899-61696202	1109	474	495	0	0	0	1224	957	0	0	990	21.7875	23.2376	0	0	0	55.6379	38.8923	0	0	44.1595	30.1243	32.5244	0	0	0	68.3511	51.1161	0	0	55.6063
XM_010906736	105032322	LOC105032322	probable folate-biopterin transporter 6, transcript variant X1	mRNA	XP_010905038.1	.	NW_011550950.1:875222-880186	2240	0	0	0	0	0	0	0	0	0	0	0	0	0	0	0	0	0	0	0	0	0	0	0	0	0	0	0	0	0	0
XR_003798702	105032322	LOC105032322	probable folate-biopterin transporter 6, transcript variant X2	misc_RNA	.	.	NW_011550950.1:875222-880186	2064	0	0	0	0	0	0	0	0	0	0	0	0	0	0	0	0	0	0	0	0	0	0	0	0	0	0	0	0	0	0
XM_010906737	105032323	LOC105032323	enhancer of rudimentary homolog, transcript variant X1	mRNA	XP_010905039.1	.	NW_011550950.1:882975-892225	894	0	0	0	0	0	0	0	0	0	0	0	0	0	0	0	0	0	0	0	0	0	0	0	0	0	0	0	0	0	0
XM_010906738	105032323	LOC105032323	enhancer of rudimentary homolog, transcript variant X2	mRNA	XP_010905040.2	.	NW_011550950.1:886329-892225	663	0	0	0	0	0	0	0	0	0	0	0	0	0	0	0	0	0	0	0	0	0	0	0	0	0	0	0	0	0	0
XM_010906739	105032324	LOC105032324	F-box/FBD/LRR-repeat protein At1g13570	mRNA	XP_010905041.1	.	NW_011550950.1:917956-923241	1661	0	0	0	0	0	0	0	0	0	0	0	0	0	0	0	0	0	0	0	0	0	0	0	0	0	0	0	0	0	0
XM_010906741	105032325	LOC105032325	serine carboxypeptidase II-2	mRNA	XP_010905043.1	.	NW_011550950.1:939007-947371	1753	0	0	0	0	0	0	0	0	0	0	0	0	0	0	0	0	0	0	0	0	0	0	0	0	0	0	0	0	0	0
gene-LOC105032326	105032326	LOC105032326	.	Gene	.	.	NW_011550950.1:951866-954593	586	0	0	0	0	0	0	0	0	0	0	0	0	0	0	0	0	0	0	0	0	0	0	0	0	0	0	0	0	0	0
XR_829790	105032327	LOC105032327	uncharacterized LOC105032327, transcript variant X6	misc_RNA	.	.	NW_011550950.1:1126042-1156910	619	0	0	0	0	0	0	0	0	0	0	0	0	0	0	0	0	0	0	0	0	0	0	0	0	0	0	0	0	0	0
XM_010906742	105032327	LOC105032327	uncharacterized LOC105032327, transcript variant X3	mRNA	XP_010905044.1	.	NW_011550950.1:1126042-1156913	609	0	0	0	0	0	0	0	0	0	0	0	0	0	0	0	0	0	0	0	0	0	0	0	0	0	0	0	0	0	0
XM_029260989	105032327	LOC105032327	uncharacterized LOC105032327, transcript variant X1	mRNA	XP_029116822.1	.	NW_011550950.1:1148456-1156911	688	0	0	0	0	0	0	0	0	0	0	0	0	0	0	0	0	0	0	0	0	0	0	0	0	0	0	0	0	0	0
XM_029260990	105032327	LOC105032327	uncharacterized LOC105032327, transcript variant X2	mRNA	XP_029116823.1	.	NW_011550950.1:1148456-1156917	673	0	0	0	0	0	0	0	0	0	0	0	0	0	0	0	0	0	0	0	0	0	0	0	0	0	0	0	0	0	0
XR_829791	105032327	LOC105032327	uncharacterized LOC105032327, transcript variant X5	misc_RNA	.	.	NW_011550950.1:1148467-1156911	690	0	0	0	0	0	0	0	0	0	0	0	0	0	0	0	0	0	0	0	0	0	0	0	0	0	0	0	0	0	0
XR_829789	105032327	LOC105032327	uncharacterized LOC105032327, transcript variant X4	misc_RNA	.	.	NW_011550950.1:1148467-1156917	675	0	0	0	0	0	0	0	0	0	0	0	0	0	0	0	0	0	0	0	0	0	0	0	0	0	0	0	0	0	0
XM_010906745	105032328	LOC105032328	probable serine/threonine-protein kinase PIX13, transcript variant X4	mRNA	XP_010905047.1	.	NW_011550950.1:1049937-1142016	1444	0	0	0	0	0	0	0	0	0	0	0	0	0	0	0	0	0	0	0	0	0	0	0	0	0	0	0	0	0	0
XM_010906744	105032328	LOC105032328	probable serine/threonine-protein kinase PIX13, transcript variant X2	mRNA	XP_010905046.1	.	NW_011550950.1:1090719-1142016	1415	0	0	0	0	0	0	0	0	0	0	0	0	0	0	0	0	0	0	0	0	0	0	0	0	0	0	0	0	0	0
XM_019846247	105032328	LOC105032328	probable serine/threonine-protein kinase PIX13, transcript variant X3	mRNA	XP_019701806.1	.	NW_011550950.1:1099310-1142016	1438	0	0	0	0	0	0	0	0	0	0	0	0	0	0	0	0	0	0	0	0	0	0	0	0	0	0	0	0	0	0
XM_010906746	105032328	LOC105032328	probable serine/threonine-protein kinase PIX13, transcript variant X5	mRNA	XP_010905048.1	.	NW_011550950.1:1137146-1142016	1414	0	0	0	0	0	0	0	0	0	0	0	0	0	0	0	0	0	0	0	0	0	0	0	0	0	0	0	0	0	0
XM_010906747	105032328	LOC105032328	probable serine/threonine-protein kinase PIX13, transcript variant X7	mRNA	XP_010905049.1	.	NW_011550950.1:1137150-1141738	1274	0	0	0	0	0	0	0	0	0	0	0	0	0	0	0	0	0	0	0	0	0	0	0	0	0	0	0	0	0	0
XM_010906743	105032328	LOC105032328	probable serine/threonine-protein kinase PIX13, transcript variant X1	mRNA	XP_010905045.2	.	NW_011550950.1:1137153-1142016	1467	0	0	0	0	0	0	0	0	0	0	0	0	0	0	0	0	0	0	0	0	0	0	0	0	0	0	0	0	0	0
XM_029260987	105032328	LOC105032328	probable serine/threonine-protein kinase PIX13, transcript variant X6	mRNA	XP_029116820.1	.	NW_011550950.1:1137427-1142016	1352	0	0	0	0	0	0	0	0	0	0	0	0	0	0	0	0	0	0	0	0	0	0	0	0	0	0	0	0	0	0
XM_019853888	105032329	LOC105032329	myosin-2, transcript variant X5	mRNA	XP_019709447.1	.	chr1:61697271-61719073	4686	0	0	0	0	0	0	0	0	0	0	0	0	0	0	0	0	0	0	0	0	0	0	0	0	0	0	0	0	0	0
XM_029260905	105032329	LOC105032329	myosin-2, transcript variant X1	mRNA	XP_029116738.1	.	chr1:61697271-61719074	4774	0	0	0	0	0	0	0	0	0	0	0	0	0	0	0	0	0	0	0	0	0	0	0	0	0	0	0	0	0	0
XM_029260907	105032329	LOC105032329	myosin-2, transcript variant X2	mRNA	XP_029116740.1	.	chr1:61697271-61719074	4788	6	41	154	255	106	31	0	250	159	39	0.05479	0.438649	7.13305	10.6258	3.55705	0.324221	0	10.9204	7.50959	0.3965	0.075755	0.613954	13.368	18.35	6.33645	0.398305	0	21.509	14.1628	0.499279
XM_029260909	105032329	LOC105032329	myosin-2, transcript variant X3	mRNA	XP_029116742.1	.	chr1:61697271-61719074	4771	0	0	0	0	0	0	0	0	0	0	0	0	0	0	0	0	0	0	0	0	0	0	0	0	0	0	0	0	0	0
XM_029260914	105032329	LOC105032329	myosin-2, transcript variant X4	mRNA	XP_029116747.1	.	chr1:61697271-61719074	4735	0	0	0	0	0	0	0	0	0	0	0	0	0	0	0	0	0	0	0	0	0	0	0	0	0	0	0	0	0	0
XM_029260929	105032329	LOC105032329	myosin-2, transcript variant X7	mRNA	XP_029116762.1	.	chr1:61697271-61719074	4615	0	0	0	0	0	0	0	0	0	0	0	0	0	0	0	0	0	0	0	0	0	0	0	0	0	0	0	0	0	0
XM_029260933	105032329	LOC105032329	myosin-2, transcript variant X8	mRNA	XP_029116766.1	.	chr1:61697271-61719075	4571	0	0	0	0	225	0	0	0	0	0	0	0	0	0	7.92766	0	0	0	0	0	0	0	0	0	14.1222	0	0	0	0	0
XM_029260924	105032329	LOC105032329	myosin-2, transcript variant X6	mRNA	XP_029116757.1	.	chr1:61697750-61718519	3744	0	0	0	0	0	0	0	0	0	0	0	0	0	0	0	0	0	0	0	0	0	0	0	0	0	0	0	0	0	0
XM_010906750	105032330	LOC105032330	uncharacterized LOC105032330	mRNA	XP_010905052.1	.	NW_011550950.1:1234585-1243369	1986	0	0	0	0	0	0	0	0	0	0	0	0	0	0	0	0	0	0	0	0	0	0	0	0	0	0	0	0	0	0
XM_010906751	105032331	LOC105032331	E3 ubiquitin-protein ligase RNF181-like	mRNA	XP_010905053.1	.	NW_011550950.1:15106-15441	336	0	0	0	0	0	0	0	0	0	0	0	0	0	0	0	0	0	0	0	0	0	0	0	0	0	0	0	0	0	0
XM_029260978	105032332	LOC105032332	putative disease resistance protein At3g14460, transcript variant X1	mRNA	XP_029116811.1	.	NW_011550950.1:46207-55691	1619	0	0	0	0	0	0	0	0	0	0	0	0	0	0	0	0	0	0	0	0	0	0	0	0	0	0	0	0	0	0
XM_029260979	105032332	LOC105032332	putative disease resistance protein At3g14460, transcript variant X2	mRNA	XP_029116812.1	.	NW_011550950.1:46207-55691	1518	0	0	0	0	0	0	0	0	0	0	0	0	0	0	0	0	0	0	0	0	0	0	0	0	0	0	0	0	0	0
gene-LOC105032333	105032333	LOC105032333	.	Gene	.	.	NW_011550950.1:206195-224001	698	0	0	0	0	0	0	0	0	0	0	0	0	0	0	0	0	0	0	0	0	0	0	0	0	0	0	0	0	0	0
XM_010906754	105032334	LOC105032334	putative leucine-rich repeat receptor-like serine/threonine-protein kinase At2g24130	mRNA	XP_010905056.2	.	NW_011550950.1:839334-842549	3100	0	0	0	0	0	0	0	0	0	0	0	0	0	0	0	0	0	0	0	0	0	0	0	0	0	0	0	0	0	0
XM_010906755	105032335	LOC105032335	valine--tRNA ligase, chloroplastic/mitochondrial 2, transcript variant X1	mRNA	XP_010905057.1	.	NW_011550951.1:153748-221078	3590	0	0	0	0	0	0	0	0	0	0	0	0	0	0	0	0	0	0	0	0	0	0	0	0	0	0	0	0	0	0
XR_003798705	105032335	LOC105032335	valine--tRNA ligase, chloroplastic/mitochondrial 2, transcript variant X2	misc_RNA	.	.	NW_011550951.1:153748-221078	3493	0	0	0	0	0	0	0	0	0	0	0	0	0	0	0	0	0	0	0	0	0	0	0	0	0	0	0	0	0	0
XM_010906760	105032336	LOC105032336	histone deacetylase 15, transcript variant X4	mRNA	XP_010905062.1	.	NW_011550951.1:627230-711494	2585	0	0	0	0	0	0	0	0	0	0	0	0	0	0	0	0	0	0	0	0	0	0	0	0	0	0	0	0	0	0
XM_010906757	105032336	LOC105032336	histone deacetylase 15, transcript variant X1	mRNA	XP_010905059.1	.	NW_011550951.1:627230-711496	2647	0	0	0	0	0	0	0	0	0	0	0	0	0	0	0	0	0	0	0	0	0	0	0	0	0	0	0	0	0	0
XM_029260991	105032336	LOC105032336	histone deacetylase 15, transcript variant X6	mRNA	XP_029116824.1	.	NW_011550951.1:627230-711497	2535	0	0	0	0	0	0	0	0	0	0	0	0	0	0	0	0	0	0	0	0	0	0	0	0	0	0	0	0	0	0
XM_010906758	105032336	LOC105032336	histone deacetylase 15, transcript variant X2	mRNA	XP_010905060.1	.	NW_011550951.1:627230-711499	2696	0	0	0	0	0	0	0	0	0	0	0	0	0	0	0	0	0	0	0	0	0	0	0	0	0	0	0	0	0	0
XM_010906759	105032336	LOC105032336	histone deacetylase 15, transcript variant X3	mRNA	XP_010905061.1	.	NW_011550951.1:627230-711500	2683	0	0	0	0	0	0	0	0	0	0	0	0	0	0	0	0	0	0	0	0	0	0	0	0	0	0	0	0	0	0
XM_010906761	105032336	LOC105032336	histone deacetylase 15, transcript variant X5	mRNA	XP_010905063.1	.	NW_011550951.1:627239-711499	2633	0	0	0	0	0	0	0	0	0	0	0	0	0	0	0	0	0	0	0	0	0	0	0	0	0	0	0	0	0	0
XM_010906762	105032337	LOC105032337	sphingosine kinase 1, transcript variant X1	mRNA	XP_010905064.1	.	chr1:61736634-61743615	1768	0	0	48	74	0	0	0	249	163	50	0	0	5.97219	8.33894	0	0	0	29.4335	20.8501	1.38443	0	0	11.1924	14.4008	0	0	0	57.9729	39.3226	1.74329
XM_029260944	105032337	LOC105032337	sphingosine kinase 1, transcript variant X3	mRNA	XP_029116777.1	.	chr1:61736634-61743615	1844	32	30	79	94	162	55	0	150	56	24	0.867309	0.843602	9.46664	10.1393	14.1234	1.49014	0	16.9889	6.82255	0.638334	1.19918	1.18074	17.7413	17.5098	25.1592	1.83064	0	33.4618	12.8671	0.8038
XM_010906770	105032337	LOC105032337	sphingosine kinase 1, transcript variant X2	mRNA	XP_010905072.1	.	chr1:61736634-61744173	1899	0	0	0	0	0	0	12	0	0	0	0	0	0	0	0	0	0.272933	0	0	0	0	0	0	0	0	0	0.358717	0	0	0
XM_010906765	105032338	LOC105032338	outer envelope pore protein 24, chloroplastic	mRNA	XP_010905067.1	.	NW_011550952.1:198142-201335	839	0	0	0	0	0	0	0	0	0	0	0	0	0	0	0	0	0	0	0	0	0	0	0	0	0	0	0	0	0	0
XM_010906766	105032339	LOC105032339	pseudouridine kinase, transcript variant X1	mRNA	XP_010905068.1	.	NW_011550952.1:462701-472654	1678	0	0	0	0	0	0	0	0	0	0	0	0	0	0	0	0	0	0	0	0	0	0	0	0	0	0	0	0	0	0
XM_010906767	105032339	LOC105032339	pseudouridine kinase, transcript variant X2	mRNA	XP_010905069.1	.	NW_011550952.1:462701-472654	1669	0	0	0	0	0	0	0	0	0	0	0	0	0	0	0	0	0	0	0	0	0	0	0	0	0	0	0	0	0	0
XM_010906768	105032339	LOC105032339	pseudouridine kinase, transcript variant X3	mRNA	XP_010905070.1	.	NW_011550952.1:462701-472654	1573	0	0	0	0	0	0	0	0	0	0	0	0	0	0	0	0	0	0	0	0	0	0	0	0	0	0	0	0	0	0
XM_010906769	105032340	LOC105032340	splicing factor U2af large subunit B, transcript variant X1	mRNA	XP_010905071.1	.	NW_011550952.1:530424-547475	2654	0	0	0	0	0	0	0	0	0	0	0	0	0	0	0	0	0	0	0	0	0	0	0	0	0	0	0	0	0	0
XR_829794	105032340	LOC105032340	splicing factor U2af large subunit B, transcript variant X2	misc_RNA	.	.	NW_011550952.1:530424-547475	2502	0	0	0	0	0	0	0	0	0	0	0	0	0	0	0	0	0	0	0	0	0	0	0	0	0	0	0	0	0	0
XR_829795	105032340	LOC105032340	splicing factor U2af large subunit B, transcript variant X4	misc_RNA	.	.	NW_011550952.1:530424-547475	2795	0	0	0	0	0	0	0	0	0	0	0	0	0	0	0	0	0	0	0	0	0	0	0	0	0	0	0	0	0	0
XM_010906771	105032340	LOC105032340	splicing factor U2af large subunit B, transcript variant X3	mRNA	XP_010905073.1	.	NW_011550952.1:530424-547486	2729	0	0	0	0	0	0	0	0	0	0	0	0	0	0	0	0	0	0	0	0	0	0	0	0	0	0	0	0	0	0
XR_003798706	105032340	LOC105032340	splicing factor U2af large subunit B, transcript variant X5	misc_RNA	.	.	NW_011550952.1:530424-547486	2870	0	0	0	0	0	0	0	0	0	0	0	0	0	0	0	0	0	0	0	0	0	0	0	0	0	0	0	0	0	0
XM_019846258	105032340	LOC105032340	splicing factor U2af large subunit B, transcript variant X6	mRNA	XP_019701817.1	.	NW_011550952.1:536493-547475	2188	0	0	0	0	0	0	0	0	0	0	0	0	0	0	0	0	0	0	0	0	0	0	0	0	0	0	0	0	0	0
XM_029260993	105032340	LOC105032340	splicing factor U2af large subunit B, transcript variant X8	mRNA	XP_029116826.1	.	NW_011550952.1:539689-547475	2011	0	0	0	0	0	0	0	0	0	0	0	0	0	0	0	0	0	0	0	0	0	0	0	0	0	0	0	0	0	0
XM_029260992	105032340	LOC105032340	splicing factor U2af large subunit B, transcript variant X7	mRNA	XP_029116825.1	.	NW_011550952.1:539725-547475	2089	0	0	0	0	0	0	0	0	0	0	0	0	0	0	0	0	0	0	0	0	0	0	0	0	0	0	0	0	0	0
XM_029260994	105032341	LOC105032341	uncharacterized LOC105032341, transcript variant X2	mRNA	XP_029116827.1	.	NW_011550952.1:562764-607415	2465	0	0	0	0	0	0	0	0	0	0	0	0	0	0	0	0	0	0	0	0	0	0	0	0	0	0	0	0	0	0
XM_010906772	105032341	LOC105032341	uncharacterized LOC105032341, transcript variant X1	mRNA	XP_010905074.1	.	NW_011550952.1:562766-607415	2373	0	0	0	0	0	0	0	0	0	0	0	0	0	0	0	0	0	0	0	0	0	0	0	0	0	0	0	0	0	0
XM_010906774	105032342	LOC105032342	zinc finger protein GAI-ASSOCIATED FACTOR 1	mRNA	XP_010905076.1	.	NW_011550952.1:690524-693969	2495	0	0	0	0	0	0	0	0	0	0	0	0	0	0	0	0	0	0	0	0	0	0	0	0	0	0	0	0	0	0
XM_010906775	105032343	LOC105032343	probable protein phosphatase 2C 55, transcript variant X2	mRNA	XP_010905077.1	.	NW_011550952.1:858920-866410	2115	0	0	0	0	0	0	0	0	0	0	0	0	0	0	0	0	0	0	0	0	0	0	0	0	0	0	0	0	0	0
XR_829797	105032343	LOC105032343	probable protein phosphatase 2C 55, transcript variant X1	misc_RNA	.	.	NW_011550952.1:858920-876841	2419	0	0	0	0	0	0	0	0	0	0	0	0	0	0	0	0	0	0	0	0	0	0	0	0	0	0	0	0	0	0
XR_829798	105032343	LOC105032343	probable protein phosphatase 2C 55, transcript variant X3	misc_RNA	.	.	NW_011550952.1:858920-878149	1981	0	0	0	0	0	0	0	0	0	0	0	0	0	0	0	0	0	0	0	0	0	0	0	0	0	0	0	0	0	0
XM_010906777	105032344	LOC105032344	vicilin-like seed storage protein At2g18540	mRNA	XP_010905079.1	.	NW_011550952.1:894770-898134	2618	0	0	0	0	0	0	0	0	0	0	0	0	0	0	0	0	0	0	0	0	0	0	0	0	0	0	0	0	0	0
XM_010906778	105032345	LOC105032345	scarecrow-like protein 15	mRNA	XP_010905080.1	.	NW_011550952.1:958848-960865	2018	0	0	0	0	0	0	0	0	0	0	0	0	0	0	0	0	0	0	0	0	0	0	0	0	0	0	0	0	0	0
XM_010906779	105032346	LOC105032346	arabinosyltransferase RRA3	mRNA	XP_010905081.1	.	NW_011550952.1:1120035-1133267	1672	0	0	0	0	0	0	0	0	0	0	0	0	0	0	0	0	0	0	0	0	0	0	0	0	0	0	0	0	0	0
XM_010906782	105032347	LOC105032347	deSI-like protein At4g17486, transcript variant X2	mRNA	XP_010905084.1	.	NW_011550952.1:1161192-1180269	1471	0	0	0	0	0	0	0	0	0	0	0	0	0	0	0	0	0	0	0	0	0	0	0	0	0	0	0	0	0	0
XM_010906781	105032347	LOC105032347	deSI-like protein At4g17486, transcript variant X1	mRNA	XP_010905083.1	.	NW_011550952.1:1161195-1180269	1555	0	0	0	0	0	0	0	0	0	0	0	0	0	0	0	0	0	0	0	0	0	0	0	0	0	0	0	0	0	0
XM_010906783	105032348	LOC105032348	homeobox-leucine zipper protein HOX12	mRNA	XP_010905085.1	.	NW_011550952.1:1181850-1183818	1067	0	0	0	0	0	0	0	0	0	0	0	0	0	0	0	0	0	0	0	0	0	0	0	0	0	0	0	0	0	0
XM_019846253	105032349	LOC105032349	uncharacterized LOC105032349, transcript variant X1	mRNA	XP_019701812.1	.	NW_011550952.1:5587-17851	3926	0	0	0	0	0	0	0	0	0	0	0	0	0	0	0	0	0	0	0	0	0	0	0	0	0	0	0	0	0	0
XM_019846254	105032349	LOC105032349	uncharacterized LOC105032349, transcript variant X2	mRNA	XP_019701813.1	.	NW_011550952.1:5587-17851	3863	0	0	0	0	0	0	0	0	0	0	0	0	0	0	0	0	0	0	0	0	0	0	0	0	0	0	0	0	0	0
XM_019846255	105032349	LOC105032349	uncharacterized LOC105032349, transcript variant X3	mRNA	XP_019701814.1	.	NW_011550952.1:5587-17851	3845	0	0	0	0	0	0	0	0	0	0	0	0	0	0	0	0	0	0	0	0	0	0	0	0	0	0	0	0	0	0
XM_010906787	105032350	LOC105032350	B3 domain-containing protein Os07g0563300	mRNA	XP_010905089.1	.	chr1:61763792-61784248	3382	197	180	261	291	430	140	67	546	416	136	2.96004	2.76045	17.0634	17.2225	20.464	2.08659	0.882969	33.8049	27.9418	1.97708	4.09268	3.86366	31.9784	29.7421	36.454	2.56338	1.16049	66.583	52.6973	2.48957
XM_010906785	105032351	LOC105032351	probable indole-3-pyruvate monooxygenase YUCCA9	mRNA	XP_010905087.1	.	NW_011550952.1:326802-330307	1339	0	0	0	0	0	0	0	0	0	0	0	0	0	0	0	0	0	0	0	0	0	0	0	0	0	0	0	0	0	0
XM_010906786	105032352	LOC105032352	bZIP transcription factor 46-like	mRNA	XP_010905088.1	.	NW_011550952.1:528698-529617	225	0	0	0	0	0	0	0	0	0	0	0	0	0	0	0	0	0	0	0	0	0	0	0	0	0	0	0	0	0	0
XM_010906788	105032353	LOC105032353	kinesin-like protein K39	mRNA	XP_010905090.2	.	NW_011550953.1:22947-39459	776	0	0	0	0	0	0	0	0	0	0	0	0	0	0	0	0	0	0	0	0	0	0	0	0	0	0	0	0	0	0
XM_010906789	105032354	LOC105032354	putative disease resistance protein RGA3	mRNA	XP_010905091.1	.	NW_011550953.1:49897-55183	3933	0	0	0	0	0	0	0	0	0	0	0	0	0	0	0	0	0	0	0	0	0	0	0	0	0	0	0	0	0	0
XM_010906790	105032355	LOC105032355	uncharacterized LOC105032355	mRNA	XP_010905092.2	.	NW_011550953.1:107433-122276	1616	0	0	0	0	0	0	0	0	0	0	0	0	0	0	0	0	0	0	0	0	0	0	0	0	0	0	0	0	0	0
XM_010906791	105032356	LOC105032356	uncharacterized LOC105032356, transcript variant X2	mRNA	XP_010905093.1	.	NW_011550953.1:145992-153460	1763	0	0	0	0	0	0	0	0	0	0	0	0	0	0	0	0	0	0	0	0	0	0	0	0	0	0	0	0	0	0
XM_029261000	105032356	LOC105032356	uncharacterized LOC105032356, transcript variant X1	mRNA	XP_029116833.1	.	NW_011550953.1:145992-153460	1766	0	0	0	0	0	0	0	0	0	0	0	0	0	0	0	0	0	0	0	0	0	0	0	0	0	0	0	0	0	0
XM_010906792	105032357	LOC105032357	probable LRR receptor-like serine/threonine-protein kinase At1g63430, transcript variant X1	mRNA	XP_010905094.1	.	NW_011550953.1:168438-187733	2459	0	0	0	0	0	0	0	0	0	0	0	0	0	0	0	0	0	0	0	0	0	0	0	0	0	0	0	0	0	0
XM_010906793	105032357	LOC105032357	probable LRR receptor-like serine/threonine-protein kinase At1g63430, transcript variant X2	mRNA	XP_010905095.1	.	NW_011550953.1:168438-187734	2424	0	0	0	0	0	0	0	0	0	0	0	0	0	0	0	0	0	0	0	0	0	0	0	0	0	0	0	0	0	0
XM_010906794	105032357	LOC105032357	probable LRR receptor-like serine/threonine-protein kinase At1g63430, transcript variant X3	mRNA	XP_010905096.1	.	NW_011550953.1:168438-187734	2421	0	0	0	0	0	0	0	0	0	0	0	0	0	0	0	0	0	0	0	0	0	0	0	0	0	0	0	0	0	0
XM_019846277	105032358	LOC105032358	protein O-glucosyltransferase 1, transcript variant X2	mRNA	XP_019701836.1	.	NW_011550953.1:192857-226644	1686	0	0	0	0	0	0	0	0	0	0	0	0	0	0	0	0	0	0	0	0	0	0	0	0	0	0	0	0	0	0
XM_010906797	105032358	LOC105032358	protein O-glucosyltransferase 1, transcript variant X1	mRNA	XP_010905099.1	.	NW_011550953.1:193985-226644	2442	0	0	0	0	0	0	0	0	0	0	0	0	0	0	0	0	0	0	0	0	0	0	0	0	0	0	0	0	0	0
XM_010906798	105032359	LOC105032359	heavy metal-associated isoprenylated plant protein 39	mRNA	XP_010905100.1	.	NW_011550953.1:241989-243538	737	0	0	0	0	0	0	0	0	0	0	0	0	0	0	0	0	0	0	0	0	0	0	0	0	0	0	0	0	0	0
XM_010906800	105032360	LOC105032360	elongation factor 2, transcript variant X2	mRNA	XP_010905102.1	.	NW_011550953.1:482786-487792	3003	0	0	0	0	0	0	0	0	0	0	0	0	0	0	0	0	0	0	0	0	0	0	0	0	0	0	0	0	0	0
XM_010906799	105032360	LOC105032360	elongation factor 2, transcript variant X1	mRNA	XP_010905101.1	.	NW_011550953.1:484813-487792	2861	0	0	0	0	0	0	0	0	0	0	0	0	0	0	0	0	0	0	0	0	0	0	0	0	0	0	0	0	0	0
XM_010906802	105032361	LOC105032361	low-temperature-induced 65 kDa protein, transcript variant X1	mRNA	XP_010905104.2	.	NW_011550953.1:496344-498357	1649	0	0	0	0	0	0	0	0	0	0	0	0	0	0	0	0	0	0	0	0	0	0	0	0	0	0	0	0	0	0
XM_019846269	105032361	LOC105032361	low-temperature-induced 65 kDa protein, transcript variant X2	mRNA	XP_019701828.1	.	NW_011550953.1:496366-498357	1630	0	0	0	0	0	0	0	0	0	0	0	0	0	0	0	0	0	0	0	0	0	0	0	0	0	0	0	0	0	0
XM_019846272	105032362	LOC105032362	trichohyalin, transcript variant X4	mRNA	XP_019701831.1	.	NW_011550953.1:615047-621037	3835	0	0	0	0	0	0	0	0	0	0	0	0	0	0	0	0	0	0	0	0	0	0	0	0	0	0	0	0	0	0
XM_019846271	105032362	LOC105032362	trichohyalin, transcript variant X2	mRNA	XP_019701830.1	.	NW_011550953.1:615047-621046	3820	0	0	0	0	0	0	0	0	0	0	0	0	0	0	0	0	0	0	0	0	0	0	0	0	0	0	0	0	0	0
XM_019846270	105032362	LOC105032362	trichohyalin, transcript variant X1	mRNA	XP_019701829.1	.	NW_011550953.1:615047-621047	3887	0	0	0	0	0	0	0	0	0	0	0	0	0	0	0	0	0	0	0	0	0	0	0	0	0	0	0	0	0	0
XM_029261002	105032362	LOC105032362	trichohyalin, transcript variant X3	mRNA	XP_029116835.1	.	NW_011550953.1:615047-621229	3793	0	0	0	0	0	0	0	0	0	0	0	0	0	0	0	0	0	0	0	0	0	0	0	0	0	0	0	0	0	0
XM_010906808	105032363	LOC105032363	vacuolar protein sorting-associated protein 28 homolog 1, transcript variant X2	mRNA	XP_010905110.1	.	chr1:61790390-61802307	1163	0	0	0	0	0	0	0	0	0	0	0	0	0	0	0	0	0	0	0	0	0	0	0	0	0	0	0	0	0	0
XR_003798690	105032363	LOC105032363	vacuolar protein sorting-associated protein 28 homolog 1, transcript variant X1	misc_RNA	.	.	chr1:61790390-61802307	1272	34	34	74	61	23	29	15	74	38	63	1.35633	1.37328	12.7807	9.58346	2.90479	1.13918	0.496896	12.0378	6.69763	2.44996	1.87532	1.92211	23.9522	16.55	5.17453	1.39948	0.653071	23.71	12.6315	3.08502
XM_029260958	105032363	LOC105032363	vacuolar protein sorting-associated protein 28 homolog 1, transcript variant X3	mRNA	XP_029116791.1	.	chr1:61790840-61802307	1216	0	0	0	0	0	0	0	0	0	0	0	0	0	0	0	0	0	0	0	0	0	0	0	0	0	0	0	0	0	0
XM_010906806	105032364	LOC105032364	probable ascorbate-specific transmembrane electron transporter 1	mRNA	XP_010905108.1	.	NW_011550953.1:642842-647616	1318	0	0	0	0	0	0	0	0	0	0	0	0	0	0	0	0	0	0	0	0	0	0	0	0	0	0	0	0	0	0
XM_010906807	105032365	LOC105032365	remorin	mRNA	XP_010905109.1	.	NW_011550953.1:682435-689566	1094	0	0	0	0	0	0	0	0	0	0	0	0	0	0	0	0	0	0	0	0	0	0	0	0	0	0	0	0	0	0
XM_029261003	105032366	LOC105032366	transcription factor MYB41-like	mRNA	XP_029116836.1	.	NW_011550953.1:767375-770659	2018	0	0	0	0	0	0	0	0	0	0	0	0	0	0	0	0	0	0	0	0	0	0	0	0	0	0	0	0	0	0
XM_010906809	105032367	LOC105032367	DEAD-box ATP-dependent RNA helicase 8	mRNA	XP_010905111.1	.	NW_011550953.1:774285-801145	2430	0	0	0	0	0	0	0	0	0	0	0	0	0	0	0	0	0	0	0	0	0	0	0	0	0	0	0	0	0	0
XR_002163349	105032368	LOC105032368	uncharacterized LOC105032368, transcript variant X2	ncRNA	.	.	NW_011550953.1:810700-819012	2071	0	0	0	0	0	0	0	0	0	0	0	0	0	0	0	0	0	0	0	0	0	0	0	0	0	0	0	0	0	0
XR_829802	105032368	LOC105032368	uncharacterized LOC105032368, transcript variant X1	ncRNA	.	.	NW_011550953.1:810700-819013	2121	0	0	0	0	0	0	0	0	0	0	0	0	0	0	0	0	0	0	0	0	0	0	0	0	0	0	0	0	0	0
XM_010906810	105032369	LOC105032369	pre-mRNA cleavage factor Im 25 kDa subunit 2	mRNA	XP_010905112.1	.	NW_011550953.1:933784-949049	1127	0	0	0	0	0	0	0	0	0	0	0	0	0	0	0	0	0	0	0	0	0	0	0	0	0	0	0	0	0	0
XM_029261006	105032370	LOC105032370	WD repeat-containing protein 48, transcript variant X2	mRNA	XP_029116839.1	.	NW_011550953.1:953113-994866	2820	0	0	0	0	0	0	0	0	0	0	0	0	0	0	0	0	0	0	0	0	0	0	0	0	0	0	0	0	0	0
XM_029261007	105032370	LOC105032370	WD repeat-containing protein 48, transcript variant X3	mRNA	XP_029116840.1	.	NW_011550953.1:953113-994866	2816	0	0	0	0	0	0	0	0	0	0	0	0	0	0	0	0	0	0	0	0	0	0	0	0	0	0	0	0	0	0
XM_029261008	105032370	LOC105032370	WD repeat-containing protein 48, transcript variant X4	mRNA	XP_029116841.1	.	NW_011550953.1:953113-997548	3055	0	0	0	0	0	0	0	0	0	0	0	0	0	0	0	0	0	0	0	0	0	0	0	0	0	0	0	0	0	0
XM_029261005	105032370	LOC105032370	WD repeat-containing protein 48, transcript variant X1	mRNA	XP_029116838.1	.	NW_011550953.1:954304-997552	2517	0	0	0	0	0	0	0	0	0	0	0	0	0	0	0	0	0	0	0	0	0	0	0	0	0	0	0	0	0	0
XR_003798710	105032370	LOC105032370	WD repeat-containing protein 48, transcript variant X5	misc_RNA	.	.	NW_011550953.1:955977-997556	2305	0	0	0	0	0	0	0	0	0	0	0	0	0	0	0	0	0	0	0	0	0	0	0	0	0	0	0	0	0	0
XM_010906818	105032371	LOC105032371	uncharacterized LOC105032371	mRNA	XP_010905120.1	.	chr1:61806852-61808531	1369	3	0	242	124	162	8	0	65	61	7	0.10654	0	39.079	18.0916	18.9981	0.27559	0	9.80844	10.0495	0.230724	0.147307	0	73.2375	31.2429	33.8428	0.338562	0	19.319	18.9531	0.290531
XM_019846275	105032372	LOC105032372	uncharacterized LOC105032372, transcript variant X3	mRNA	XP_019701834.1	.	NW_011550953.1:1009236-1023959	2395	0	0	0	0	0	0	0	0	0	0	0	0	0	0	0	0	0	0	0	0	0	0	0	0	0	0	0	0	0	0
XM_019846276	105032372	LOC105032372	uncharacterized LOC105032372, transcript variant X4	mRNA	XP_019701835.1	.	NW_011550953.1:1009236-1023959	2412	0	0	0	0	0	0	0	0	0	0	0	0	0	0	0	0	0	0	0	0	0	0	0	0	0	0	0	0	0	0
XM_029261009	105032372	LOC105032372	uncharacterized LOC105032372, transcript variant X1	mRNA	XP_029116842.1	.	NW_011550953.1:1009864-1023959	2168	0	0	0	0	0	0	0	0	0	0	0	0	0	0	0	0	0	0	0	0	0	0	0	0	0	0	0	0	0	0
XM_029261011	105032372	LOC105032372	uncharacterized LOC105032372, transcript variant X2	mRNA	XP_029116844.1	.	NW_011550953.1:1009864-1023959	2165	0	0	0	0	0	0	0	0	0	0	0	0	0	0	0	0	0	0	0	0	0	0	0	0	0	0	0	0	0	0
XM_029261012	105032372	LOC105032372	uncharacterized LOC105032372, transcript variant X5	mRNA	XP_029116845.1	.	NW_011550953.1:1009864-1023959	2228	0	0	0	0	0	0	0	0	0	0	0	0	0	0	0	0	0	0	0	0	0	0	0	0	0	0	0	0	0	0
XM_010906817	105032373	LOC105032373	LIM domain-containing protein PLIM2b	mRNA	XP_010905119.1	.	NW_011550953.1:1065378-1067544	1066	0	0	0	0	0	0	0	0	0	0	0	0	0	0	0	0	0	0	0	0	0	0	0	0	0	0	0	0	0	0
XM_010906819	105032374	LOC105032374	MLO-like protein 6	mRNA	XP_010905121.1	.	NW_011550953.1:1153992-1175121	2118	0	0	0	0	0	0	0	0	0	0	0	0	0	0	0	0	0	0	0	0	0	0	0	0	0	0	0	0	0	0
XM_010906821	105032375	LOC105032375	MLO-like protein 6	mRNA	XP_010905123.1	.	NW_011550953.1:1198814-1209784	1881	0	0	0	0	0	0	0	0	0	0	0	0	0	0	0	0	0	0	0	0	0	0	0	0	0	0	0	0	0	0
XM_019846263	105032376	LOC105032376	subtilisin-like protease SBT1.2	mRNA	XP_019701822.2	.	NW_011550953.1:314677-316995	2319	0	0	0	0	0	0	0	0	0	0	0	0	0	0	0	0	0	0	0	0	0	0	0	0	0	0	0	0	0	0
XM_019846264	105032377	LOC105032377	serpin-Z1B-like	mRNA	XP_019701823.1	.	NW_011550953.1:338061-341708	1122	0	0	0	0	0	0	0	0	0	0	0	0	0	0	0	0	0	0	0	0	0	0	0	0	0	0	0	0	0	0
XM_010906824	105032378	LOC105032378	putative serpin-Z12	mRNA	XP_010905126.1	.	NW_011550953.1:397171-434234	486	0	0	0	0	0	0	0	0	0	0	0	0	0	0	0	0	0	0	0	0	0	0	0	0	0	0	0	0	0	0
XM_010906828	105032379	LOC105032379	ADP-ribosylation factor GTPase-activating protein AGD5	mRNA	XP_010905130.1	.	chr1:61832415-61840550	2148	74	45	194	189	252	78	100	362	245	85	1.75507	1.08615	19.9701	17.5487	18.8817	1.80797	2.08311	35.2668	25.8938	1.95557	2.42664	1.52023	37.4257	30.3054	33.6354	2.22108	2.73784	69.4623	48.8349	2.46248
XM_019846265	105032380	LOC105032380	LRR receptor-like serine/threonine-protein kinase FLS2	mRNA	XP_019701824.1	.	NW_011550953.1:459938-478798	2295	0	0	0	0	0	0	0	0	0	0	0	0	0	0	0	0	0	0	0	0	0	0	0	0	0	0	0	0	0	0
XM_029260997	105032381	LOC105032381	low-temperature-induced 65 kDa protein	mRNA	XP_029116830.1	.	NW_011550953.1:499769-548005	1049	0	0	0	0	0	0	0	0	0	0	0	0	0	0	0	0	0	0	0	0	0	0	0	0	0	0	0	0	0	0
XM_019846262	105032382	LOC105032382	receptor-like protein EIX2	mRNA	XP_019701821.1	.	NW_011550953.1:587941-590628	2688	0	0	0	0	0	0	0	0	0	0	0	0	0	0	0	0	0	0	0	0	0	0	0	0	0	0	0	0	0	0
XM_019846274	105032383	LOC105032383	protein SHORTAGE IN CHIASMATA 1	mRNA	XP_019701833.1	.	NW_011550953.1:604650-614973	5216	0	0	0	0	0	0	0	0	0	0	0	0	0	0	0	0	0	0	0	0	0	0	0	0	0	0	0	0	0	0
XR_003798707	105032385	LOC105032385	uncharacterized LOC105032385, transcript variant X1	ncRNA	.	.	NW_011550953.1:860880-870506	1090	0	0	0	0	0	0	0	0	0	0	0	0	0	0	0	0	0	0	0	0	0	0	0	0	0	0	0	0	0	0
XR_003798708	105032385	LOC105032385	uncharacterized LOC105032385, transcript variant X2	ncRNA	.	.	NW_011550953.1:860880-870506	1191	0	0	0	0	0	0	0	0	0	0	0	0	0	0	0	0	0	0	0	0	0	0	0	0	0	0	0	0	0	0
XR_003798709	105032385	LOC105032385	uncharacterized LOC105032385, transcript variant X3	ncRNA	.	.	NW_011550953.1:860880-870506	1273	0	0	0	0	0	0	0	0	0	0	0	0	0	0	0	0	0	0	0	0	0	0	0	0	0	0	0	0	0	0
XM_010906832	105032386	LOC105032386	FHA domain-containing protein FHA2	mRNA	XP_010905134.1	.	NW_011550954.1:1852-9318	1371	0	0	0	0	0	0	0	0	0	0	0	0	0	0	0	0	0	0	0	0	0	0	0	0	0	0	0	0	0	0
XR_829819	105032387	LOC105032387	SWR1-complex protein 4, transcript variant X2	misc_RNA	.	.	chr1:4949369-4961473	1828	0	0	0	0	0	0	0	0	0	0	0	0	0	0	0	0	0	0	0	0	0	0	0	0	0	0	0	0	0	0
XM_010906865	105032387	LOC105032387	SWR1-complex protein 4, transcript variant X1	mRNA	XP_010905167.1	.	chr1:4949369-4961478	1914	68	79	248	141	267	131	99	207	199	118	1.79695	2.12465	28.6454	14.712	22.4711	3.44694	2.32656	22.6351	23.6215	3.04255	2.48454	2.97376	53.6841	25.4065	40.0294	4.23456	3.05779	44.5826	44.5494	3.83123
XM_010906833	105032388	LOC105032388	probable magnesium transporter NIPA2, transcript variant X1	mRNA	XP_010905135.1	.	NW_011550954.1:31389-40602	1743	0	0	0	0	0	0	0	0	0	0	0	0	0	0	0	0	0	0	0	0	0	0	0	0	0	0	0	0	0	0
XM_029261015	105032388	LOC105032388	probable magnesium transporter NIPA2, transcript variant X2	mRNA	XP_029116848.1	.	NW_011550954.1:31389-40602	1552	0	0	0	0	0	0	0	0	0	0	0	0	0	0	0	0	0	0	0	0	0	0	0	0	0	0	0	0	0	0
XM_010906834	105032389	LOC105032389	uncharacterized LOC105032389	mRNA	XP_010905136.1	.	NW_011550954.1:57399-60138	1636	0	0	0	0	0	0	0	0	0	0	0	0	0	0	0	0	0	0	0	0	0	0	0	0	0	0	0	0	0	0
gene-LOC105032390	105032390	LOC105032390	.	Gene	.	.	NW_011550954.1:132507-142563	1382	0	0	0	0	0	0	0	0	0	0	0	0	0	0	0	0	0	0	0	0	0	0	0	0	0	0	0	0	0	0
XM_010906838	105032391	LOC105032391	protein TIC 20-I, chloroplastic, transcript variant X1	mRNA	XP_010905140.1	.	chr1:61864362-61870452	1968	0	0	0	0	0	0	0	0	0	0	0	0	0	0	0	0	0	0	0	0	0	0	0	0	0	0	0	0	0	0
XM_010906845	105032391	LOC105032391	protein TIC 20-I, chloroplastic, transcript variant X2	mRNA	XP_010905147.1	.	chr1:61864362-61870452	2121	127	91	30	63	85	6	0	48	18	13	3.04704	2.23267	3.08948	5.87049	6.40397	0.136637	0	4.66195	1.83157	0.30124	4.21297	3.12495	5.78995	10.1379	11.4079	0.167858	0	9.1823	3.45428	0.379326
XM_029260963	105032391	LOC105032391	protein TIC 20-I, chloroplastic, transcript variant X3	mRNA	XP_029116796.1	.	chr1:61864362-61870452	2019	0	0	0	0	0	0	0	0	0	0	0	0	0	0	0	0	0	0	0	0	0	0	0	0	0	0	0	0	0	0
XM_010906835	105032392	LOC105032392	forkhead box protein B2	mRNA	XP_010905137.1	.	NW_011550954.1:149025-153312	900	0	0	0	0	0	0	0	0	0	0	0	0	0	0	0	0	0	0	0	0	0	0	0	0	0	0	0	0	0	0
XM_010906836	105032393	LOC105032393	selenium-binding protein 1, transcript variant X3	mRNA	XP_010905138.1	.	NW_011550954.1:162008-174662	1895	0	0	0	0	0	0	0	0	0	0	0	0	0	0	0	0	0	0	0	0	0	0	0	0	0	0	0	0	0	0
XM_019846281	105032393	LOC105032393	selenium-binding protein 1, transcript variant X1	mRNA	XP_019701840.1	.	NW_011550954.1:162008-174662	2029	0	0	0	0	0	0	0	0	0	0	0	0	0	0	0	0	0	0	0	0	0	0	0	0	0	0	0	0	0	0
XM_019846282	105032393	LOC105032393	selenium-binding protein 1, transcript variant X2	mRNA	XP_019701841.1	.	NW_011550954.1:162008-174662	2012	0	0	0	0	0	0	0	0	0	0	0	0	0	0	0	0	0	0	0	0	0	0	0	0	0	0	0	0	0	0
XM_019846283	105032393	LOC105032393	selenium-binding protein 1, transcript variant X4	mRNA	XP_019701842.1	.	NW_011550954.1:162008-174662	1903	0	0	0	0	0	0	0	0	0	0	0	0	0	0	0	0	0	0	0	0	0	0	0	0	0	0	0	0	0	0
XM_019846284	105032393	LOC105032393	selenium-binding protein 1, transcript variant X5	mRNA	XP_019701843.1	.	NW_011550954.1:162008-174662	1878	0	0	0	0	0	0	0	0	0	0	0	0	0	0	0	0	0	0	0	0	0	0	0	0	0	0	0	0	0	0
XM_019846285	105032393	LOC105032393	selenium-binding protein 1, transcript variant X6	mRNA	XP_019701844.1	.	NW_011550954.1:162008-174662	1886	0	0	0	0	0	0	0	0	0	0	0	0	0	0	0	0	0	0	0	0	0	0	0	0	0	0	0	0	0	0
XM_019846286	105032393	LOC105032393	selenium-binding protein 1, transcript variant X8	mRNA	XP_019701845.1	.	NW_011550954.1:162008-174662	1895	0	0	0	0	0	0	0	0	0	0	0	0	0	0	0	0	0	0	0	0	0	0	0	0	0	0	0	0	0	0
XM_019846287	105032393	LOC105032393	selenium-binding protein 1, transcript variant X7	mRNA	XP_019701846.1	.	NW_011550954.1:162008-174662	1912	0	0	0	0	0	0	0	0	0	0	0	0	0	0	0	0	0	0	0	0	0	0	0	0	0	0	0	0	0	0
XM_010906837	105032394	LOC105032394	adenosylhomocysteinase	mRNA	XP_010905139.1	.	NW_011550954.1:178911-180236	935	0	0	0	0	0	0	0	0	0	0	0	0	0	0	0	0	0	0	0	0	0	0	0	0	0	0	0	0	0	0
gene-LOC105032395	105032395	LOC105032395	.	Gene	.	.	NW_011550954.1:331401-337743	1620	0	0	0	0	0	0	0	0	0	0	0	0	0	0	0	0	0	0	0	0	0	0	0	0	0	0	0	0	0	0
XM_010906840	105032396	LOC105032396	alpha-humulene synthase	mRNA	XP_010905142.1	.	NW_011550954.1:289405-297855	2187	0	0	0	0	0	0	0	0	0	0	0	0	0	0	0	0	0	0	0	0	0	0	0	0	0	0	0	0	0	0
XM_010906841	105032397	LOC105032397	chloroplast envelope quinone oxidoreductase homolog	mRNA	XP_010905143.1	.	NW_011550954.1:380511-390907	1420	0	0	0	0	0	0	0	0	0	0	0	0	0	0	0	0	0	0	0	0	0	0	0	0	0	0	0	0	0	0
XM_029261013	105032398	LOC105032398	cyclin-dependent kinase F-3-like, transcript variant X1	mRNA	XP_029116846.1	.	NW_011550954.1:393669-397570	1257	0	0	0	0	0	0	0	0	0	0	0	0	0	0	0	0	0	0	0	0	0	0	0	0	0	0	0	0	0	0
XM_029261014	105032398	LOC105032398	cyclin-dependent kinase F-3-like, transcript variant X2	mRNA	XP_029116847.1	.	NW_011550954.1:393669-397570	1152	0	0	0	0	0	0	0	0	0	0	0	0	0	0	0	0	0	0	0	0	0	0	0	0	0	0	0	0	0	0
XM_010906843	105032399	LOC105032399	myb-like protein X	mRNA	XP_010905145.1	.	NW_011550954.1:399744-411810	3464	0	0	0	0	0	0	0	0	0	0	0	0	0	0	0	0	0	0	0	0	0	0	0	0	0	0	0	0	0	0
XM_010906844	105032400	LOC105032400	glycine-rich RNA-binding protein 2, mitochondrial	mRNA	XP_010905146.1	.	NW_011550954.1:431004-435850	1051	0	0	0	0	0	0	0	0	0	0	0	0	0	0	0	0	0	0	0	0	0	0	0	0	0	0	0	0	0	0
XM_010906846	105032401	LOC105032401	UDP-glucuronate 4-epimerase 6	mRNA	XP_010905148.1	.	NW_011550954.1:478980-480801	1822	0	0	0	0	0	0	0	0	0	0	0	0	0	0	0	0	0	0	0	0	0	0	0	0	0	0	0	0	0	0
XM_010906847	105032402	LOC105032402	GTP cyclohydrolase 1	mRNA	XP_010905149.1	.	NW_011550954.1:495990-507826	2149	0	0	0	0	0	0	0	0	0	0	0	0	0	0	0	0	0	0	0	0	0	0	0	0	0	0	0	0	0	0
XM_010906849	105032403	LOC105032403	probable acyl-activating enzyme 16, chloroplastic, transcript variant X3	mRNA	XP_010905151.1	.	NW_011550954.1:534180-633358	2606	0	0	0	0	0	0	0	0	0	0	0	0	0	0	0	0	0	0	0	0	0	0	0	0	0	0	0	0	0	0
XR_003798715	105032403	LOC105032403	probable acyl-activating enzyme 16, chloroplastic, transcript variant X5	misc_RNA	.	.	NW_011550954.1:534180-633358	2463	0	0	0	0	0	0	0	0	0	0	0	0	0	0	0	0	0	0	0	0	0	0	0	0	0	0	0	0	0	0
XM_010906848	105032403	LOC105032403	probable acyl-activating enzyme 16, chloroplastic, transcript variant X1	mRNA	XP_010905150.1	.	NW_011550954.1:534180-633359	2689	0	0	0	0	0	0	0	0	0	0	0	0	0	0	0	0	0	0	0	0	0	0	0	0	0	0	0	0	0	0
XM_019846288	105032403	LOC105032403	probable acyl-activating enzyme 16, chloroplastic, transcript variant X2	mRNA	XP_019701847.1	.	NW_011550954.1:534180-633359	2686	0	0	0	0	0	0	0	0	0	0	0	0	0	0	0	0	0	0	0	0	0	0	0	0	0	0	0	0	0	0
XM_019846289	105032403	LOC105032403	probable acyl-activating enzyme 16, chloroplastic, transcript variant X4	mRNA	XP_019701848.1	.	NW_011550954.1:534180-633359	2546	0	0	0	0	0	0	0	0	0	0	0	0	0	0	0	0	0	0	0	0	0	0	0	0	0	0	0	0	0	0
XM_010906850	105032404	LOC105032404	probable DNA replication complex GINS protein PSF3	mRNA	XP_010905152.1	.	NW_011550954.1:641711-649025	1188	0	0	0	0	0	0	0	0	0	0	0	0	0	0	0	0	0	0	0	0	0	0	0	0	0	0	0	0	0	0
XM_010906851	105032405	LOC105032405	protein TIC 22-like, chloroplastic	mRNA	XP_010905153.1	.	NW_011550954.1:654890-662214	1345	0	0	0	0	0	0	0	0	0	0	0	0	0	0	0	0	0	0	0	0	0	0	0	0	0	0	0	0	0	0
XM_010906852	105032406	LOC105032406	uncharacterized LOC105032406	mRNA	XP_010905154.2	.	NW_011550954.1:685171-692417	3732	0	0	0	0	0	0	0	0	0	0	0	0	0	0	0	0	0	0	0	0	0	0	0	0	0	0	0	0	0	0
XM_019850265	105032407	LOC105032407	uncharacterized LOC105032407	mRNA	XP_019705824.1	.	chr1:61901496-61905519	699	10	15	58	85	50	5	0	29	27	0	0.675245	1.11446	18.2141	24.1717	11.4272	0.352985	0	8.57272	8.50658	0	0.933623	1.55985	34.1348	41.7428	20.3562	0.433641	0	16.885	16.0431	0
XM_010906853	105032408	LOC105032408	FK506-binding protein 2	mRNA	XP_010905155.1	.	NW_011550954.1:694246-704911	900	0	0	0	0	0	0	0	0	0	0	0	0	0	0	0	0	0	0	0	0	0	0	0	0	0	0	0	0	0	0
XM_010906854	105032409	LOC105032409	70 kDa peptidyl-prolyl isomerase	mRNA	XP_010905156.1	.	NW_011550954.1:707584-712516	2335	0	0	0	0	0	0	0	0	0	0	0	0	0	0	0	0	0	0	0	0	0	0	0	0	0	0	0	0	0	0
XM_010906856	105032410	LOC105032410	transcription factor bHLH62	mRNA	XP_010905158.1	.	NW_011550954.1:755266-758326	2351	0	0	0	0	0	0	0	0	0	0	0	0	0	0	0	0	0	0	0	0	0	0	0	0	0	0	0	0	0	0
XM_010906858	105032411	LOC105032411	probable UDP-N-acetylglucosamine--peptide N-acetylglucosaminyltransferase SEC	mRNA	XP_010905160.1	.	NW_011550954.1:803671-816960	3577	0	0	0	0	0	0	0	0	0	0	0	0	0	0	0	0	0	0	0	0	0	0	0	0	0	0	0	0	0	0
XM_010906859	105032412	LOC105032412	40S ribosomal protein S8	mRNA	XP_010905161.1	.	NW_011550954.1:820325-825703	1002	0	0	0	0	0	0	0	0	0	0	0	0	0	0	0	0	0	0	0	0	0	0	0	0	0	0	0	0	0	0
XM_010906860	105032413	LOC105032413	uncharacterized LOC105032413	mRNA	XP_010905162.3	.	NW_011550954.1:847986-850942	1832	0	0	0	0	0	0	0	0	0	0	0	0	0	0	0	0	0	0	0	0	0	0	0	0	0	0	0	0	0	0
XM_010906861	105032414	LOC105032414	uncharacterized LOC105032414	mRNA	XP_010905163.1	.	NW_011550954.1:885493-887018	1526	0	0	0	0	0	0	0	0	0	0	0	0	0	0	0	0	0	0	0	0	0	0	0	0	0	0	0	0	0	0
XM_010906862	105032415	LOC105032415	cytochrome b561 and DOMON domain-containing protein At4g12980	mRNA	XP_010905164.1	.	NW_011550954.1:1010658-1013923	1589	0	0	0	0	0	0	0	0	0	0	0	0	0	0	0	0	0	0	0	0	0	0	0	0	0	0	0	0	0	0
XM_010906863	105032416	LOC105032416	60S ribosomal protein L32-1	mRNA	XP_010905165.1	.	NW_011550954.1:1075349-1096937	838	0	0	0	0	0	0	0	0	0	0	0	0	0	0	0	0	0	0	0	0	0	0	0	0	0	0	0	0	0	0
XM_010906866	105032418	LOC105032418	uncharacterized LOC105032418, transcript variant X1	mRNA	XP_010905168.1	.	chr1:61907583-61913124	1348	98	47	0	8	23	12	0	0	10	15	3.67177	1.80514	0	1.16235	2.69271	0.412395	0	0	1.67774	0.532564	5.07675	2.52655	0	2.0073	4.79673	0.506626	0	0	3.16416	0.670612
XR_002164584	105032418	LOC105032418	uncharacterized LOC105032418, transcript variant X2	misc_RNA	.	.	chr1:61907583-61913124	1251	0	0	0	0	0	0	0	0	0	0	0	0	0	0	0	0	0	0	0	0	0	0	0	0	0	0	0	0	0	0
XM_019846279	105032419	LOC105032419	cysteine proteinase inhibitor 4	mRNA	XP_019701838.1	.	NW_011550954.1:818691-820061	1371	0	0	0	0	0	0	0	0	0	0	0	0	0	0	0	0	0	0	0	0	0	0	0	0	0	0	0	0	0	0
gene-LOC105032420	105032420	LOC105032420	.	Gene	.	.	NW_011550954.1:1097208-1105291	2551	0	0	0	0	0	0	0	0	0	0	0	0	0	0	0	0	0	0	0	0	0	0	0	0	0	0	0	0	0	0
gene-LOC105032421	105032421	LOC105032421	.	Gene	.	.	NW_011550954.1:1112237-1128627	1712	0	0	0	0	0	0	0	0	0	0	0	0	0	0	0	0	0	0	0	0	0	0	0	0	0	0	0	0	0	0
XM_010906867	105032422	LOC105032422	uncharacterized LOC105032422	mRNA	XP_010905169.1	.	NW_011550955.1:22989-29830	1342	0	0	0	0	0	0	0	0	0	0	0	0	0	0	0	0	0	0	0	0	0	0	0	0	0	0	0	0	0	0
XR_829803	105032423	LOC105032423	UDP-glycosyltransferase 83A1-like, transcript variant X2	misc_RNA	.	.	NW_011550955.1:76786-80799	2491	0	0	0	0	0	0	0	0	0	0	0	0	0	0	0	0	0	0	0	0	0	0	0	0	0	0	0	0	0	0
XM_029261017	105032423	LOC105032423	UDP-glycosyltransferase 83A1-like, transcript variant X1	mRNA	XP_029116850.1	.	NW_011550955.1:78106-80799	1938	0	0	0	0	0	0	0	0	0	0	0	0	0	0	0	0	0	0	0	0	0	0	0	0	0	0	0	0	0	0
XM_010906869	105032424	LOC105032424	probable methyltransferase At1g27930	mRNA	XP_010905171.1	.	NW_011550955.1:130912-132014	1103	0	0	0	0	0	0	0	0	0	0	0	0	0	0	0	0	0	0	0	0	0	0	0	0	0	0	0	0	0	0
XM_010906870	105032425	LOC105032425	probable methyltransferase At1g27930	mRNA	XP_010905172.1	.	NW_011550955.1:197590-198995	1406	0	0	0	0	0	0	0	0	0	0	0	0	0	0	0	0	0	0	0	0	0	0	0	0	0	0	0	0	0	0
XM_010906873	105032426	LOC105032426	uncharacterized LOC105032426, transcript variant X3	mRNA	XP_010905175.1	.	NW_011550955.1:202736-213744	893	0	0	0	0	0	0	0	0	0	0	0	0	0	0	0	0	0	0	0	0	0	0	0	0	0	0	0	0	0	0
XR_003798717	105032426	LOC105032426	uncharacterized LOC105032426, transcript variant X2	misc_RNA	.	.	NW_011550955.1:202736-213744	1067	0	0	0	0	0	0	0	0	0	0	0	0	0	0	0	0	0	0	0	0	0	0	0	0	0	0	0	0	0	0
XR_829804	105032426	LOC105032426	uncharacterized LOC105032426, transcript variant X4	misc_RNA	.	.	NW_011550955.1:202736-213747	1073	0	0	0	0	0	0	0	0	0	0	0	0	0	0	0	0	0	0	0	0	0	0	0	0	0	0	0	0	0	0
XM_010906871	105032426	LOC105032426	uncharacterized LOC105032426, transcript variant X1	mRNA	XP_010905173.1	.	NW_011550955.1:206039-213744	923	0	0	0	0	0	0	0	0	0	0	0	0	0	0	0	0	0	0	0	0	0	0	0	0	0	0	0	0	0	0
XM_010906874	105032427	LOC105032427	protein indeterminate-domain 16-like	mRNA	XP_010905176.1	.	NW_011550955.1:262728-263344	617	0	0	0	0	0	0	0	0	0	0	0	0	0	0	0	0	0	0	0	0	0	0	0	0	0	0	0	0	0	0
XM_010906876	105032428	LOC105032428	alpha-ketoglutarate-dependent dioxygenase alkB, transcript variant X2	mRNA	XP_010905178.1	.	NW_011550955.1:250688-263547	2152	0	0	0	0	0	0	0	0	0	0	0	0	0	0	0	0	0	0	0	0	0	0	0	0	0	0	0	0	0	0
XM_010906875	105032428	LOC105032428	alpha-ketoglutarate-dependent dioxygenase alkB, transcript variant X1	mRNA	XP_010905177.1	.	NW_011550955.1:250689-263547	2157	0	0	0	0	0	0	0	0	0	0	0	0	0	0	0	0	0	0	0	0	0	0	0	0	0	0	0	0	0	0
XM_010906881	105032429	LOC105032429	transmembrane protein 184C, transcript variant X1	mRNA	XP_010905183.1	.	chr1:61914570-61920475	1374	0	0	0	0	0	0	0	0	0	0	0	0	0	0	0	0	0	0	0	0	0	0	0	0	0	0	0	0	0	0
XM_010906889	105032429	LOC105032429	transmembrane protein 184C, transcript variant X2	mRNA	XP_010905191.1	.	chr1:61914572-61920477	1378	221	201	180	234	275	103	206	209	172	133	8.14508	7.57432	28.8462	33.9537	32.1181	3.76062	6.71826	31.7657	28.352	4.74817	11.2617	10.6014	54.0604	58.6356	57.2144	4.61991	8.82981	62.5664	53.4708	5.97897
XM_010906879	105032430	LOC105032430	uncharacterized LOC105032430, transcript variant X2	mRNA	XP_010905181.1	.	NW_011550955.1:266961-286559	823	0	0	0	0	0	0	0	0	0	0	0	0	0	0	0	0	0	0	0	0	0	0	0	0	0	0	0	0	0	0
XM_010906878	105032430	LOC105032430	uncharacterized LOC105032430, transcript variant X1	mRNA	XP_010905180.1	.	NW_011550955.1:266980-286559	870	0	0	0	0	0	0	0	0	0	0	0	0	0	0	0	0	0	0	0	0	0	0	0	0	0	0	0	0	0	0
XR_003798718	105032431	LOC105032431	ribonucleoside-diphosphate reductase small chain, transcript variant X1	misc_RNA	.	.	NW_011550955.1:271281-292771	2151	0	0	0	0	0	0	0	0	0	0	0	0	0	0	0	0	0	0	0	0	0	0	0	0	0	0	0	0	0	0
XM_010906880	105032431	LOC105032431	ribonucleoside-diphosphate reductase small chain, transcript variant X2	mRNA	XP_010905182.1	.	NW_011550955.1:288944-292771	1597	0	0	0	0	0	0	0	0	0	0	0	0	0	0	0	0	0	0	0	0	0	0	0	0	0	0	0	0	0	0
XM_029261018	105032431	LOC105032431	ribonucleoside-diphosphate reductase small chain, transcript variant X4	mRNA	XP_029116851.1	.	NW_011550955.1:289961-292771	1605	0	0	0	0	0	0	0	0	0	0	0	0	0	0	0	0	0	0	0	0	0	0	0	0	0	0	0	0	0	0
XM_010906882	105032431	LOC105032431	ribonucleoside-diphosphate reductase small chain, transcript variant X3	mRNA	XP_010905184.1	.	NW_011550955.1:290537-292771	1229	0	0	0	0	0	0	0	0	0	0	0	0	0	0	0	0	0	0	0	0	0	0	0	0	0	0	0	0	0	0
XM_010906883	105032432	LOC105032432	chlorophyll a-b binding protein 7, chloroplastic	mRNA	XP_010905185.1	.	NW_011550955.1:325105-327281	1189	0	0	0	0	0	0	0	0	0	0	0	0	0	0	0	0	0	0	0	0	0	0	0	0	0	0	0	0	0	0
XR_003798719	105032433	LOC105032433	splicing factor-like protein 1, transcript variant X2	misc_RNA	.	.	NW_011550955.1:346713-350893	2644	0	0	0	0	0	0	0	0	0	0	0	0	0	0	0	0	0	0	0	0	0	0	0	0	0	0	0	0	0	0
XR_002163356	105032433	LOC105032433	splicing factor-like protein 1, transcript variant X1	misc_RNA	.	.	NW_011550955.1:346713-350943	3548	0	0	0	0	0	0	0	0	0	0	0	0	0	0	0	0	0	0	0	0	0	0	0	0	0	0	0	0	0	0
XM_019846294	105032433	LOC105032433	splicing factor-like protein 1, transcript variant X3	mRNA	XP_019701853.1	.	NW_011550955.1:346719-349856	2728	0	0	0	0	0	0	0	0	0	0	0	0	0	0	0	0	0	0	0	0	0	0	0	0	0	0	0	0	0	0
XM_010906886	105032434	LOC105032434	F-box protein At1g67340	mRNA	XP_010905188.1	.	NW_011550955.1:415465-417395	1753	0	0	0	0	0	0	0	0	0	0	0	0	0	0	0	0	0	0	0	0	0	0	0	0	0	0	0	0	0	0
XM_010906887	105032435	LOC105032435	6-phosphogluconate dehydrogenase, decarboxylating 1, chloroplastic	mRNA	XP_010905189.1	.	NW_011550955.1:512071-522615	2076	0	0	0	0	0	0	0	0	0	0	0	0	0	0	0	0	0	0	0	0	0	0	0	0	0	0	0	0	0	0
XM_010906888	105032436	LOC105032436	RNA-binding protein pno1	mRNA	XP_010905190.1	.	NW_011550955.1:534175-537797	972	0	0	0	0	0	0	0	0	0	0	0	0	0	0	0	0	0	0	0	0	0	0	0	0	0	0	0	0	0	0
XM_010906890	105032437	LOC105032437	ELMO domain-containing protein B, transcript variant X1	mRNA	XP_010905192.1	.	NW_011550955.1:555937-564686	2117	0	0	0	0	0	0	0	0	0	0	0	0	0	0	0	0	0	0	0	0	0	0	0	0	0	0	0	0	0	0
XM_010906891	105032437	LOC105032437	ELMO domain-containing protein B, transcript variant X3	mRNA	XP_010905193.1	.	NW_011550955.1:555937-564686	2048	0	0	0	0	0	0	0	0	0	0	0	0	0	0	0	0	0	0	0	0	0	0	0	0	0	0	0	0	0	0
XR_829807	105032437	LOC105032437	ELMO domain-containing protein B, transcript variant X2	misc_RNA	.	.	NW_011550955.1:555937-564686	2039	0	0	0	0	0	0	0	0	0	0	0	0	0	0	0	0	0	0	0	0	0	0	0	0	0	0	0	0	0	0
XM_010906892	105032438	LOC105032438	norbelladine 4'-O-methyltransferase, transcript variant X1	mRNA	XP_010905194.1	.	NW_011550955.1:631983-637706	1284	0	0	0	0	0	0	0	0	0	0	0	0	0	0	0	0	0	0	0	0	0	0	0	0	0	0	0	0	0	0
XM_010906893	105032438	LOC105032438	norbelladine 4'-O-methyltransferase, transcript variant X2	mRNA	XP_010905195.1	.	NW_011550955.1:631983-637706	1152	0	0	0	0	0	0	0	0	0	0	0	0	0	0	0	0	0	0	0	0	0	0	0	0	0	0	0	0	0	0
XM_010906894	105032439	LOC105032439	norbelladine 4'-O-methyltransferase	mRNA	XP_010905196.1	.	NW_011550955.1:662030-664986	893	0	0	0	0	0	0	0	0	0	0	0	0	0	0	0	0	0	0	0	0	0	0	0	0	0	0	0	0	0	0
XM_010906895	105032440	LOC105032440	SNF1-related protein kinase regulatory subunit gamma-1	mRNA	XP_010905197.1	.	NW_011550955.1:675270-690507	1727	0	0	0	0	0	0	0	0	0	0	0	0	0	0	0	0	0	0	0	0	0	0	0	0	0	0	0	0	0	0
XM_029261020	105032441	LOC105032441	exocyst complex component EXO70B1-like, transcript variant X3	mRNA	XP_029116853.1	.	NW_011550955.1:692600-701653	2306	0	0	0	0	0	0	0	0	0	0	0	0	0	0	0	0	0	0	0	0	0	0	0	0	0	0	0	0	0	0
XM_010906896	105032441	LOC105032441	exocyst complex component EXO70B1-like, transcript variant X1	mRNA	XP_010905198.1	.	NW_011550955.1:693184-701653	2908	0	0	0	0	0	0	0	0	0	0	0	0	0	0	0	0	0	0	0	0	0	0	0	0	0	0	0	0	0	0
XM_029261019	105032441	LOC105032441	exocyst complex component EXO70B1-like, transcript variant X2	mRNA	XP_029116852.1	.	NW_011550955.1:693184-701653	2850	0	0	0	0	0	0	0	0	0	0	0	0	0	0	0	0	0	0	0	0	0	0	0	0	0	0	0	0	0	0
XM_010906899	105032442	LOC105032442	glutamate formimidoyltransferase	mRNA	XP_010905201.1	.	chr1:61937619-61940514	1290	0	0	0	17	38	0	26	0	0	0	0	0	0	2.61009	4.64522	0	0.881563	0	0	0	0	0	0	4.50743	8.27488	0	1.15864	0	0	0
XM_019846297	105032443	LOC105032443	SWI/SNF complex component SNF12 homolog	mRNA	XP_019701856.1	.	NW_011550955.1:705084-733787	2165	0	0	0	0	0	0	0	0	0	0	0	0	0	0	0	0	0	0	0	0	0	0	0	0	0	0	0	0	0	0
XR_829809	105032444	LOC105032444	uncharacterized LOC105032444	ncRNA	.	.	NW_011550955.1:734910-740522	498	0	0	0	0	0	0	0	0	0	0	0	0	0	0	0	0	0	0	0	0	0	0	0	0	0	0	0	0	0	0
XM_010906898	105032445	LOC105032445	small ribosomal subunit biogenesis GTPase RsgA 1, mitochondrial, transcript variant X1	mRNA	XP_010905200.1	.	NW_011550955.1:773336-779230	1845	0	0	0	0	0	0	0	0	0	0	0	0	0	0	0	0	0	0	0	0	0	0	0	0	0	0	0	0	0	0
XR_829810	105032445	LOC105032445	small ribosomal subunit biogenesis GTPase RsgA 1, mitochondrial, transcript variant X2	misc_RNA	.	.	NW_011550955.1:773336-779234	1994	0	0	0	0	0	0	0	0	0	0	0	0	0	0	0	0	0	0	0	0	0	0	0	0	0	0	0	0	0	0
XR_829811	105032445	LOC105032445	small ribosomal subunit biogenesis GTPase RsgA 1, mitochondrial, transcript variant X3	misc_RNA	.	.	NW_011550955.1:773643-779234	1637	0	0	0	0	0	0	0	0	0	0	0	0	0	0	0	0	0	0	0	0	0	0	0	0	0	0	0	0	0	0
XM_010906900	105032446	LOC105032446	F-box/kelch-repeat protein At1g67480	mRNA	XP_010905202.1	.	NW_011550955.1:839359-846873	2010	0	0	0	0	0	0	0	0	0	0	0	0	0	0	0	0	0	0	0	0	0	0	0	0	0	0	0	0	0	0
XM_019846292	105032447	LOC105032447	chloride channel protein CLC-a-like	mRNA	XP_019701851.1	.	NW_011550955.1:861358-865711	2721	0	0	0	0	0	0	0	0	0	0	0	0	0	0	0	0	0	0	0	0	0	0	0	0	0	0	0	0	0	0
XM_010906903	105032448	LOC105032448	stearoyl-[acyl-carrier-protein] 9-desaturase, chloroplastic-like	mRNA	XP_010905205.1	.	NW_011550955.1:914825-923187	1843	0	0	0	0	0	0	0	0	0	0	0	0	0	0	0	0	0	0	0	0	0	0	0	0	0	0	0	0	0	0
XM_019846296	105032449	LOC105032449	protein transport protein Sec24-like At4g32640	mRNA	XP_019701855.1	.	NW_011550955.1:930095-967081	2802	0	0	0	0	0	0	0	0	0	0	0	0	0	0	0	0	0	0	0	0	0	0	0	0	0	0	0	0	0	0
XM_010906905	105032450	LOC105032450	alpha-soluble NSF attachment protein	mRNA	XP_010905207.1	.	NW_011550955.1:993473-1016110	1277	0	0	0	0	0	0	0	0	0	0	0	0	0	0	0	0	0	0	0	0	0	0	0	0	0	0	0	0	0	0
XM_019846293	105032451	LOC105032451	E3 ubiquitin-protein ligase UPL2	mRNA	XP_019701852.1	.	NW_011550955.1:1049843-1071409	11421	0	0	0	0	0	0	0	0	0	0	0	0	0	0	0	0	0	0	0	0	0	0	0	0	0	0	0	0	0	0
XM_010906909	105032452	LOC105032452	protein ULTRAPETALA 1, transcript variant X1	mRNA	XP_010905211.1	.	chr1:61955845-61964430	4913	21	32	26	44	83	5	0	30	24	15	0.209598	0.337627	1.15767	1.7914	2.70525	0.050792	0	1.25232	1.1037	0.144916	0.289799	0.472559	2.16957	3.09362	4.81906	0.062397	0	2.46659	2.08154	0.182481
XR_003798701	105032452	LOC105032452	protein ULTRAPETALA 1, transcript variant X2	misc_RNA	.	.	chr1:61955845-61964430	4844	0	0	0	0	0	0	0	0	0	0	0	0	0	0	0	0	0	0	0	0	0	0	0	0	0	0	0	0	0	0
XM_019846291	105032453	LOC105032453	uncharacterized LOC105032453	mRNA	XP_019701850.1	.	NW_011550955.1:56674-60583	720	0	0	0	0	0	0	0	0	0	0	0	0	0	0	0	0	0	0	0	0	0	0	0	0	0	0	0	0	0	0
gene-LOC105032455	105032455	LOC105032455	.	Gene	.	.	NW_011550955.1:218306-219301	996	0	0	0	0	0	0	0	0	0	0	0	0	0	0	0	0	0	0	0	0	0	0	0	0	0	0	0	0	0	0
XM_010906910	105032456	LOC105032456	cytochrome P450 78A5	mRNA	XP_010905212.1	.	NW_011550955.1:457507-460053	1847	0	0	0	0	0	0	0	0	0	0	0	0	0	0	0	0	0	0	0	0	0	0	0	0	0	0	0	0	0	0
XM_010906911	105032457	LOC105032457	probable pectate lyase 4	mRNA	XP_010905213.3	.	NW_011550955.1:511717-513136	1261	0	0	0	0	0	0	0	0	0	0	0	0	0	0	0	0	0	0	0	0	0	0	0	0	0	0	0	0	0	0
XM_010906912	105032458	LOC105032458	transcription factor FER-LIKE IRON DEFICIENCY-INDUCED TRANSCRIPTION FACTOR-like	mRNA	XP_010905214.2	.	NW_011550955.1:761854-763408	1054	0	0	0	0	0	0	0	0	0	0	0	0	0	0	0	0	0	0	0	0	0	0	0	0	0	0	0	0	0	0
XM_010906913	105032459	LOC105032459	probable linoleate 9S-lipoxygenase 4	mRNA	XP_010905215.1	.	NW_011550956.1:216317-225068	3004	0	0	0	0	0	0	0	0	0	0	0	0	0	0	0	0	0	0	0	0	0	0	0	0	0	0	0	0	0	0
XM_010906914	105032461	LOC105032461	vacuole membrane protein KMS1	mRNA	XP_010905216.1	.	NW_011550956.1:420031-452607	2326	0	0	0	0	0	0	0	0	0	0	0	0	0	0	0	0	0	0	0	0	0	0	0	0	0	0	0	0	0	0
XM_010906916	105032462	LOC105032462	F-box protein At1g55000	mRNA	XP_010905218.2	.	NW_011550956.1:460833-466353	1106	0	0	0	0	0	0	0	0	0	0	0	0	0	0	0	0	0	0	0	0	0	0	0	0	0	0	0	0	0	0
XM_010906919	105032463	LOC105032463	phytohormone-binding protein CSBP	mRNA	XP_010905221.1	.	chr1:61965208-61966194	830	0	0	0	0	0	0	0	0	0	0	0	0	0	0	0	0	0	0	0	0	0	0	0	0	0	0	0	0	0	0
XM_010906917	105032464	LOC105032464	protein AUXIN RESPONSE 4, transcript variant X1	mRNA	XP_010905219.1	.	NW_011550956.1:685647-694465	2056	0	0	0	0	0	0	0	0	0	0	0	0	0	0	0	0	0	0	0	0	0	0	0	0	0	0	0	0	0	0
XM_029261022	105032464	LOC105032464	protein AUXIN RESPONSE 4, transcript variant X2	mRNA	XP_029116855.1	.	NW_011550956.1:685647-694465	1972	0	0	0	0	0	0	0	0	0	0	0	0	0	0	0	0	0	0	0	0	0	0	0	0	0	0	0	0	0	0
XM_029261023	105032464	LOC105032464	protein AUXIN RESPONSE 4, transcript variant X4	mRNA	XP_029116856.1	.	NW_011550956.1:686283-694471	1485	0	0	0	0	0	0	0	0	0	0	0	0	0	0	0	0	0	0	0	0	0	0	0	0	0	0	0	0	0	0
XM_019846298	105032464	LOC105032464	protein AUXIN RESPONSE 4, transcript variant X3	mRNA	XP_019701857.1	.	NW_011550956.1:689439-694471	1461	0	0	0	0	0	0	0	0	0	0	0	0	0	0	0	0	0	0	0	0	0	0	0	0	0	0	0	0	0	0
XM_010906918	105032465	LOC105032465	sugar transport protein MST4	mRNA	XP_010905220.1	.	NW_011550956.1:767396-774089	2092	0	0	0	0	0	0	0	0	0	0	0	0	0	0	0	0	0	0	0	0	0	0	0	0	0	0	0	0	0	0
XM_010906920	105032466	LOC105032466	chloride channel protein CLC-d, transcript variant X1	mRNA	XP_010905222.1	.	NW_011550956.1:798724-861660	3129	0	0	0	0	0	0	0	0	0	0	0	0	0	0	0	0	0	0	0	0	0	0	0	0	0	0	0	0	0	0
XM_010906921	105032466	LOC105032466	chloride channel protein CLC-d, transcript variant X5	mRNA	XP_010905223.1	.	NW_011550956.1:798724-861660	3124	0	0	0	0	0	0	0	0	0	0	0	0	0	0	0	0	0	0	0	0	0	0	0	0	0	0	0	0	0	0
XM_029261024	105032466	LOC105032466	chloride channel protein CLC-d, transcript variant X2	mRNA	XP_029116857.1	.	NW_011550956.1:798724-861661	3217	0	0	0	0	0	0	0	0	0	0	0	0	0	0	0	0	0	0	0	0	0	0	0	0	0	0	0	0	0	0
XM_029261025	105032466	LOC105032466	chloride channel protein CLC-d, transcript variant X3	mRNA	XP_029116858.1	.	NW_011550956.1:798724-861661	3314	0	0	0	0	0	0	0	0	0	0	0	0	0	0	0	0	0	0	0	0	0	0	0	0	0	0	0	0	0	0
XM_029261026	105032466	LOC105032466	chloride channel protein CLC-d, transcript variant X4	mRNA	XP_029116859.1	.	NW_011550956.1:798724-861661	3227	0	0	0	0	0	0	0	0	0	0	0	0	0	0	0	0	0	0	0	0	0	0	0	0	0	0	0	0	0	0
XM_029261027	105032466	LOC105032466	chloride channel protein CLC-d, transcript variant X6	mRNA	XP_029116860.1	.	NW_011550956.1:798724-861661	3222	0	0	0	0	0	0	0	0	0	0	0	0	0	0	0	0	0	0	0	0	0	0	0	0	0	0	0	0	0	0
XM_010906922	105032467	LOC105032467	heat shock protein 90-6, mitochondrial	mRNA	XP_010905224.1	.	NW_011550956.1:999823-1017357	3112	0	0	0	0	0	0	0	0	0	0	0	0	0	0	0	0	0	0	0	0	0	0	0	0	0	0	0	0	0	0
XM_029261028	105032468	LOC105032468	putative DUF21 domain-containing protein At3g13070, chloroplastic, transcript variant X2	mRNA	XP_029116861.1	.	NW_011550956.1:1198477-1286129	3889	0	0	0	0	0	0	0	0	0	0	0	0	0	0	0	0	0	0	0	0	0	0	0	0	0	0	0	0	0	0
XM_010906923	105032468	LOC105032468	putative DUF21 domain-containing protein At3g13070, chloroplastic, transcript variant X1	mRNA	XP_010905225.1	.	NW_011550956.1:1198478-1286129	3900	0	0	0	0	0	0	0	0	0	0	0	0	0	0	0	0	0	0	0	0	0	0	0	0	0	0	0	0	0	0
gene-LOC105032470	105032470	LOC105032470	.	Gene	.	.	NW_011550957.1:78172-88121	552	0	0	0	0	0	0	0	0	0	0	0	0	0	0	0	0	0	0	0	0	0	0	0	0	0	0	0	0	0	0
XM_010906924	105032471	LOC105032471	thiosulfate sulfurtransferase 16, chloroplastic, transcript variant X1	mRNA	XP_010905226.1	.	NW_011550957.1:147695-164608	1189	0	0	0	0	0	0	0	0	0	0	0	0	0	0	0	0	0	0	0	0	0	0	0	0	0	0	0	0	0	0
XM_010906926	105032471	LOC105032471	thiosulfate sulfurtransferase 16, chloroplastic, transcript variant X2	mRNA	XP_010905228.1	.	NW_011550957.1:147695-164612	1187	0	0	0	0	0	0	0	0	0	0	0	0	0	0	0	0	0	0	0	0	0	0	0	0	0	0	0	0	0	0
XM_010906927	105032472	LOC105032472	heterodimeric geranylgeranyl pyrophosphate synthase small subunit, chloroplastic	mRNA	XP_010905229.1	.	NW_011550957.1:190524-192115	1591	0	0	0	0	0	0	0	0	0	0	0	0	0	0	0	0	0	0	0	0	0	0	0	0	0	0	0	0	0	0
XM_010906928	105032473	LOC105032473	thiol-disulfide oxidoreductase LTO1, transcript variant X1	mRNA	XP_010905230.1	.	NW_011550957.1:341892-355040	1646	0	0	0	0	0	0	0	0	0	0	0	0	0	0	0	0	0	0	0	0	0	0	0	0	0	0	0	0	0	0
XM_010906929	105032473	LOC105032473	thiol-disulfide oxidoreductase LTO1, transcript variant X2	mRNA	XP_010905231.1	.	NW_011550957.1:341894-355040	1590	0	0	0	0	0	0	0	0	0	0	0	0	0	0	0	0	0	0	0	0	0	0	0	0	0	0	0	0	0	0
XM_010906930	105032474	LOC105032474	tRNA pseudouridine synthase A	mRNA	XP_010905232.2	.	NW_011550957.1:362842-364851	1888	0	0	0	0	0	0	0	0	0	0	0	0	0	0	0	0	0	0	0	0	0	0	0	0	0	0	0	0	0	0
XM_029261032	105032475	LOC105032475	coiled-coil domain-containing protein 124-like	mRNA	XP_029116865.1	.	NW_011550957.1:626035-638373	1396	0	0	0	0	0	0	0	0	0	0	0	0	0	0	0	0	0	0	0	0	0	0	0	0	0	0	0	0	0	0
XM_010906932	105032476	LOC105032476	GDSL esterase/lipase At5g55050	mRNA	XP_010905234.1	.	NW_011550957.1:647478-656149	1718	0	0	0	0	0	0	0	0	0	0	0	0	0	0	0	0	0	0	0	0	0	0	0	0	0	0	0	0	0	0
XM_010906933	105032477	LOC105032477	dehydrin DHN1	mRNA	XP_010905235.1	.	NW_011550957.1:1085971-1087486	1147	0	0	0	0	0	0	0	0	0	0	0	0	0	0	0	0	0	0	0	0	0	0	0	0	0	0	0	0	0	0
XM_010906936	105032478	LOC105032478	receptor-like protein kinase THESEUS 1	mRNA	XP_010905238.1	.	chr1:61975066-61979060	3895	24	100	189	197	225	110	192	81	131	102	0.30295	1.32602	10.7278	10.081	9.28699	1.42346	2.21218	4.33913	7.59086	1.29178	0.418872	1.85597	20.1049	17.4091	16.5436	1.74872	2.90747	8.54646	14.3161	1.62663
XM_019846307	105032479	LOC105032479	uncharacterized LOC105032479, transcript variant X1	mRNA	XP_019701866.1	.	NW_011550957.1:1221106-1255071	1138	0	0	0	0	0	0	0	0	0	0	0	0	0	0	0	0	0	0	0	0	0	0	0	0	0	0	0	0	0	0
XM_019846308	105032479	LOC105032479	uncharacterized LOC105032479, transcript variant X2	mRNA	XP_019701867.1	.	NW_011550957.1:1221106-1256105	943	0	0	0	0	0	0	0	0	0	0	0	0	0	0	0	0	0	0	0	0	0	0	0	0	0	0	0	0	0	0
XR_829818	105032480	LOC105032480	uncharacterized LOC105032480	ncRNA	.	.	NW_011550957.1:1256680-1258514	1674	0	0	0	0	0	0	0	0	0	0	0	0	0	0	0	0	0	0	0	0	0	0	0	0	0	0	0	0	0	0
XM_010906935	105032481	LOC105032481	lysine histidine transporter-like 8	mRNA	XP_010905237.1	.	NW_011550957.1:1256423-1260783	1695	0	0	0	0	0	0	0	0	0	0	0	0	0	0	0	0	0	0	0	0	0	0	0	0	0	0	0	0	0	0
XM_010907286	105032482	LOC105032482	uncharacterized LOC105032482, transcript variant X1	mRNA	XP_010905588.1	.	chr1:2081843-2091501	5706	0	0	0	0	0	0	0	0	0	0	0	0	0	0	0	0	0	0	0	0	0	0	0	0	0	0	0	0	0	0
XM_010908717	105032482	LOC105032482	uncharacterized LOC105032482, transcript variant X3	mRNA	XP_010907019.1	.	chr1:2081843-2091973	5482	0	0	0	0	0	0	0	0	0	0	0	0	0	0	0	0	0	0	0	0	0	0	0	0	0	0	0	0	0	0
XM_010907998	105032482	LOC105032482	uncharacterized LOC105032482, transcript variant X2	mRNA	XP_010906300.1	.	chr1:2081843-2092512	5894	126	60	116	69	82	45	0	62	90	36	1.08762	0.523878	4.3364	2.31878	2.22482	0.379026	0	2.19981	3.45775	0.296692	1.50379	0.733244	8.12681	4.00436	3.96324	0.465633	0	4.3328	6.52119	0.373599
XM_010906937	105032483	LOC105032483	4-coumarate--CoA ligase-like 4	mRNA	XP_010905239.2	.	NW_011550957.1:1349449-1352540	2016	0	0	0	0	0	0	0	0	0	0	0	0	0	0	0	0	0	0	0	0	0	0	0	0	0	0	0	0	0	0
XM_010906938	105032484	LOC105032484	uncharacterized LOC105032484, transcript variant X1	mRNA	XP_010905240.1	.	NW_011550957.1:73993-77830	3507	0	0	0	0	0	0	0	0	0	0	0	0	0	0	0	0	0	0	0	0	0	0	0	0	0	0	0	0	0	0
XM_019846301	105032484	LOC105032484	uncharacterized LOC105032484, transcript variant X2	mRNA	XP_019701860.1	.	NW_011550957.1:73993-77830	2046	0	0	0	0	0	0	0	0	0	0	0	0	0	0	0	0	0	0	0	0	0	0	0	0	0	0	0	0	0	0
XM_029261029	105032484	LOC105032484	uncharacterized LOC105032484, transcript variant X3	mRNA	XP_029116862.1	.	NW_011550957.1:73993-79136	2016	0	0	0	0	0	0	0	0	0	0	0	0	0	0	0	0	0	0	0	0	0	0	0	0	0	0	0	0	0	0
XM_010906939	105032485	LOC105032485	glutathione S-transferase F10	mRNA	XP_010905241.2	.	NW_011550957.1:117933-119133	1017	0	0	0	0	0	0	0	0	0	0	0	0	0	0	0	0	0	0	0	0	0	0	0	0	0	0	0	0	0	0
XM_010906940	105032486	LOC105032486	high mobility group B protein 9, transcript variant X4	mRNA	XP_010905242.1	.	NW_011550957.1:194117-198756	1476	0	0	0	0	0	0	0	0	0	0	0	0	0	0	0	0	0	0	0	0	0	0	0	0	0	0	0	0	0	0
XM_019846305	105032486	LOC105032486	high mobility group B protein 9, transcript variant X3	mRNA	XP_019701864.1	.	NW_011550957.1:194117-198757	1492	0	0	0	0	0	0	0	0	0	0	0	0	0	0	0	0	0	0	0	0	0	0	0	0	0	0	0	0	0	0
XM_029261030	105032486	LOC105032486	high mobility group B protein 9, transcript variant X5	mRNA	XP_029116863.1	.	NW_011550957.1:194117-198757	1477	0	0	0	0	0	0	0	0	0	0	0	0	0	0	0	0	0	0	0	0	0	0	0	0	0	0	0	0	0	0
XM_029261031	105032486	LOC105032486	high mobility group B protein 9, transcript variant X6	mRNA	XP_029116864.1	.	NW_011550957.1:194117-198757	1462	0	0	0	0	0	0	0	0	0	0	0	0	0	0	0	0	0	0	0	0	0	0	0	0	0	0	0	0	0	0
XM_019846303	105032486	LOC105032486	high mobility group B protein 9, transcript variant X1	mRNA	XP_019701862.1	.	NW_011550957.1:194117-198758	1547	0	0	0	0	0	0	0	0	0	0	0	0	0	0	0	0	0	0	0	0	0	0	0	0	0	0	0	0	0	0
XM_019846304	105032486	LOC105032486	high mobility group B protein 9, transcript variant X2	mRNA	XP_019701863.1	.	NW_011550957.1:194117-198758	1532	0	0	0	0	0	0	0	0	0	0	0	0	0	0	0	0	0	0	0	0	0	0	0	0	0	0	0	0	0	0
XM_010906941	105032487	LOC105032487	L-ascorbate oxidase homolog	mRNA	XP_010905243.1	.	NW_011550957.1:1002099-1017082	1803	0	0	0	0	0	0	0	0	0	0	0	0	0	0	0	0	0	0	0	0	0	0	0	0	0	0	0	0	0	0
XM_010906942	105032488	LOC105032488	BTB/POZ and MATH domain-containing protein 1, transcript variant X1	mRNA	XP_010905244.1	.	NW_011550958.1:26450-39605	1839	0	0	0	0	0	0	0	0	0	0	0	0	0	0	0	0	0	0	0	0	0	0	0	0	0	0	0	0	0	0
XM_010906943	105032488	LOC105032488	BTB/POZ and MATH domain-containing protein 1, transcript variant X2	mRNA	XP_010905245.1	.	NW_011550958.1:26471-39608	1826	0	0	0	0	0	0	0	0	0	0	0	0	0	0	0	0	0	0	0	0	0	0	0	0	0	0	0	0	0	0
XR_829820	105032489	LOC105032489	uncharacterized LOC105032489	ncRNA	.	.	chr1:61991163-61992198	927	0	0	0	0	0	0	0	0	0	0	0	0	0	0	0	0	0	0	0	0	0	0	0	0	0	0	0	0	0	0
XM_010906944	105032490	LOC105032490	endo-1,3;1,4-beta-D-glucanase	mRNA	XP_010905246.1	.	NW_011550958.1:340355-360368	1044	0	0	0	0	0	0	0	0	0	0	0	0	0	0	0	0	0	0	0	0	0	0	0	0	0	0	0	0	0	0
XM_010906945	105032491	LOC105032491	uncharacterized protein At5g19025, transcript variant X2	mRNA	XP_010905247.1	.	NW_011550958.1:425892-444833	909	0	0	0	0	0	0	0	0	0	0	0	0	0	0	0	0	0	0	0	0	0	0	0	0	0	0	0	0	0	0
XM_010906946	105032491	LOC105032491	uncharacterized protein At5g19025, transcript variant X3	mRNA	XP_010905248.1	.	NW_011550958.1:426093-444833	1370	0	0	0	0	0	0	0	0	0	0	0	0	0	0	0	0	0	0	0	0	0	0	0	0	0	0	0	0	0	0
XM_019846309	105032491	LOC105032491	uncharacterized protein At5g19025, transcript variant X1	mRNA	XP_019701868.1	.	NW_011550958.1:432701-444833	1484	0	0	0	0	0	0	0	0	0	0	0	0	0	0	0	0	0	0	0	0	0	0	0	0	0	0	0	0	0	0
XM_010906947	105032493	LOC105032493	EID1-like F-box protein 3	mRNA	XP_010905249.3	.	NW_011550958.1:727932-729440	1509	0	0	0	0	0	0	0	0	0	0	0	0	0	0	0	0	0	0	0	0	0	0	0	0	0	0	0	0	0	0
XR_002163357	105032494	LOC105032494	uncharacterized LOC105032494, transcript variant X2	misc_RNA	.	.	NW_011550958.1:790340-799490	1788	0	0	0	0	0	0	0	0	0	0	0	0	0	0	0	0	0	0	0	0	0	0	0	0	0	0	0	0	0	0
XR_002163358	105032494	LOC105032494	uncharacterized LOC105032494, transcript variant X3	misc_RNA	.	.	NW_011550958.1:790394-799490	1725	0	0	0	0	0	0	0	0	0	0	0	0	0	0	0	0	0	0	0	0	0	0	0	0	0	0	0	0	0	0
XM_010906948	105032494	LOC105032494	uncharacterized LOC105032494, transcript variant X1	mRNA	XP_010905250.1	.	NW_011550958.1:797761-799490	1633	0	0	0	0	0	0	0	0	0	0	0	0	0	0	0	0	0	0	0	0	0	0	0	0	0	0	0	0	0	0
XM_010906952	105032495	LOC105032495	protein HUA2-LIKE 2, transcript variant X4	mRNA	XP_010905254.1	.	NW_011550958.1:836793-866959	5026	0	0	0	0	0	0	0	0	0	0	0	0	0	0	0	0	0	0	0	0	0	0	0	0	0	0	0	0	0	0
XM_010906950	105032495	LOC105032495	protein HUA2-LIKE 2, transcript variant X2	mRNA	XP_010905252.1	.	NW_011550958.1:836923-866959	4905	0	0	0	0	0	0	0	0	0	0	0	0	0	0	0	0	0	0	0	0	0	0	0	0	0	0	0	0	0	0
XM_029261033	105032495	LOC105032495	protein HUA2-LIKE 2, transcript variant X6	mRNA	XP_029116866.1	.	NW_011550958.1:837221-857769	4712	0	0	0	0	0	0	0	0	0	0	0	0	0	0	0	0	0	0	0	0	0	0	0	0	0	0	0	0	0	0
XM_010906949	105032495	LOC105032495	protein HUA2-LIKE 2, transcript variant X1	mRNA	XP_010905251.1	.	NW_011550958.1:837221-866959	5057	0	0	0	0	0	0	0	0	0	0	0	0	0	0	0	0	0	0	0	0	0	0	0	0	0	0	0	0	0	0
XM_010906951	105032495	LOC105032495	protein HUA2-LIKE 2, transcript variant X3	mRNA	XP_010905253.1	.	NW_011550958.1:837221-866959	5048	0	0	0	0	0	0	0	0	0	0	0	0	0	0	0	0	0	0	0	0	0	0	0	0	0	0	0	0	0	0
XM_010906953	105032495	LOC105032495	protein HUA2-LIKE 2, transcript variant X5	mRNA	XP_010905255.1	.	NW_011550958.1:837221-866959	4925	0	0	0	0	0	0	0	0	0	0	0	0	0	0	0	0	0	0	0	0	0	0	0	0	0	0	0	0	0	0
XM_010906955	105032496	LOC105032496	H/ACA ribonucleoprotein complex non-core subunit NAF1	mRNA	XP_010905257.1	.	chr1:61992462-62002207	2913	0	0	45	9	31	0	0	22	13	0	0	0	3.37928	0.572467	1.69794	0	0	1.54431	0.979521	0	0	0	6.33308	0.98861	3.02467	0	0	3.04172	1.84734	0
XM_010906954	105032497	LOC105032497	putative invertase inhibitor	mRNA	XP_010905256.1	.	NW_011550958.1:127924-128458	535	0	0	0	0	0	0	0	0	0	0	0	0	0	0	0	0	0	0	0	0	0	0	0	0	0	0	0	0	0	0
XM_010906956	105032498	LOC105032498	protein OSCA1	mRNA	XP_010905258.1	.	NW_011550958.1:546241-665927	2523	0	0	0	0	0	0	0	0	0	0	0	0	0	0	0	0	0	0	0	0	0	0	0	0	0	0	0	0	0	0
gene-LOC105032499	105032499	LOC105032499	.	Gene	.	.	NW_011550958.1:1293543-1296998	1033	0	0	0	0	0	0	0	0	0	0	0	0	0	0	0	0	0	0	0	0	0	0	0	0	0	0	0	0	0	0
gene-LOC105032500	105032500	LOC105032500	.	Gene	.	.	NW_011550958.1:1335146-1338468	684	0	0	0	0	0	0	0	0	0	0	0	0	0	0	0	0	0	0	0	0	0	0	0	0	0	0	0	0	0	0
XM_010906957	105032501	LOC105032501	3-oxo-Delta(4,5)-steroid 5-beta-reductase, transcript variant X1	mRNA	XP_010905259.1	.	NW_011550959.1:13123-26535	1871	0	0	0	0	0	0	0	0	0	0	0	0	0	0	0	0	0	0	0	0	0	0	0	0	0	0	0	0	0	0
XM_010906958	105032501	LOC105032501	3-oxo-Delta(4,5)-steroid 5-beta-reductase, transcript variant X3	mRNA	XP_010905260.1	.	NW_011550959.1:13137-26535	1668	0	0	0	0	0	0	0	0	0	0	0	0	0	0	0	0	0	0	0	0	0	0	0	0	0	0	0	0	0	0
XM_019846310	105032501	LOC105032501	3-oxo-Delta(4,5)-steroid 5-beta-reductase, transcript variant X2	mRNA	XP_019701869.1	.	NW_011550959.1:25038-26534	1497	0	0	0	0	0	0	0	0	0	0	0	0	0	0	0	0	0	0	0	0	0	0	0	0	0	0	0	0	0	0
XM_010906959	105032502	LOC105032502	3-oxo-Delta(4,5)-steroid 5-beta-reductase	mRNA	XP_010905261.1	.	NW_011550959.1:92529-93927	1399	0	0	0	0	0	0	0	0	0	0	0	0	0	0	0	0	0	0	0	0	0	0	0	0	0	0	0	0	0	0
XM_010906963	105032503	LOC105032503	uncharacterized LOC105032503	mRNA	XP_010905265.1	.	chr1:62013901-62014472	572	0	7	6	7	4	4	18	0	0	7	0	0.615482	1.95726	2.2016	0.901471	0.297105	1.36231	0	0	0.53101	0	0.861457	3.66809	3.802	1.60586	0.364993	1.79049	0	0	0.668656
XM_010906960	105032504	LOC105032504	zinc finger protein ZAT10	mRNA	XP_010905262.1	.	NW_011550959.1:152028-152927	900	0	0	0	0	0	0	0	0	0	0	0	0	0	0	0	0	0	0	0	0	0	0	0	0	0	0	0	0	0	0
XM_010906961	105032505	LOC105032505	probable esterase D14L	mRNA	XP_010905263.1	.	NW_011550959.1:156514-165759	1364	0	0	0	0	0	0	0	0	0	0	0	0	0	0	0	0	0	0	0	0	0	0	0	0	0	0	0	0	0	0
XM_010906962	105032506	LOC105032506	uncharacterized LOC105032506	mRNA	XP_010905264.1	.	NW_011550959.1:200365-201341	977	0	0	0	0	0	0	0	0	0	0	0	0	0	0	0	0	0	0	0	0	0	0	0	0	0	0	0	0	0	0
XM_010906965	105032507	LOC105032507	probable E3 ubiquitin-protein ligase RHY1A, transcript variant X2	mRNA	XP_010905267.1	.	NW_011550959.1:206847-211600	1341	0	0	0	0	0	0	0	0	0	0	0	0	0	0	0	0	0	0	0	0	0	0	0	0	0	0	0	0	0	0
XM_010906964	105032507	LOC105032507	probable E3 ubiquitin-protein ligase RHY1A, transcript variant X1	mRNA	XP_010905266.1	.	NW_011550959.1:206847-211670	1432	0	0	0	0	0	0	0	0	0	0	0	0	0	0	0	0	0	0	0	0	0	0	0	0	0	0	0	0	0	0
XR_829822	105032508	LOC105032508	uncharacterized LOC105032508, transcript variant X2	misc_RNA	.	.	NW_011550959.1:212796-222007	2274	0	0	0	0	0	0	0	0	0	0	0	0	0	0	0	0	0	0	0	0	0	0	0	0	0	0	0	0	0	0
XM_010906966	105032508	LOC105032508	uncharacterized LOC105032508, transcript variant X1	mRNA	XP_010905268.1	.	NW_011550959.1:212796-222008	2179	0	0	0	0	0	0	0	0	0	0	0	0	0	0	0	0	0	0	0	0	0	0	0	0	0	0	0	0	0	0
XR_002163362	105032509	LOC105032509	uncharacterized LOC105032509	ncRNA	.	.	NW_011550959.1:223117-226486	480	0	0	0	0	0	0	0	0	0	0	0	0	0	0	0	0	0	0	0	0	0	0	0	0	0	0	0	0	0	0
XM_010906968	105032510	LOC105032510	protein CONSERVED IN THE GREEN LINEAGE AND DIATOMS 27, chloroplastic	mRNA	XP_010905270.1	.	NW_011550959.1:246779-257237	1687	0	0	0	0	0	0	0	0	0	0	0	0	0	0	0	0	0	0	0	0	0	0	0	0	0	0	0	0	0	0
XR_002163359	105032511	LOC105032511	uncharacterized LOC105032511, transcript variant X2	ncRNA	.	.	NW_011550959.1:245672-255445	956	0	0	0	0	0	0	0	0	0	0	0	0	0	0	0	0	0	0	0	0	0	0	0	0	0	0	0	0	0	0
XR_003798725	105032511	LOC105032511	uncharacterized LOC105032511, transcript variant X3	ncRNA	.	.	NW_011550959.1:245672-255445	844	0	0	0	0	0	0	0	0	0	0	0	0	0	0	0	0	0	0	0	0	0	0	0	0	0	0	0	0	0	0
XR_829823	105032511	LOC105032511	uncharacterized LOC105032511, transcript variant X1	ncRNA	.	.	NW_011550959.1:245672-255445	850	0	0	0	0	0	0	0	0	0	0	0	0	0	0	0	0	0	0	0	0	0	0	0	0	0	0	0	0	0	0
XM_010906970	105032512	LOC105032512	ubiquitin-NEDD8-like protein RUB2, transcript variant X2	mRNA	XP_010905272.1	.	NW_011550959.1:259048-266998	797	0	0	0	0	0	0	0	0	0	0	0	0	0	0	0	0	0	0	0	0	0	0	0	0	0	0	0	0	0	0
XM_029261037	105032512	LOC105032512	ubiquitin-NEDD8-like protein RUB2, transcript variant X1	mRNA	XP_029116870.1	.	NW_011550959.1:259048-266998	968	0	0	0	0	0	0	0	0	0	0	0	0	0	0	0	0	0	0	0	0	0	0	0	0	0	0	0	0	0	0
XM_010906974	105032513	LOC105032513	BTB/POZ domain-containing protein At5g03250	mRNA	XP_010905276.1	.	chr1:62051758-62057677	2369	0	0	0	0	0	0	0	0	0	0	0	0	0	0	0	0	0	0	0	0	0	0	0	0	0	0	0	0	0	0
XM_029261040	105032514	LOC105032514	leucine-rich repeat protein 2, transcript variant X2	mRNA	XP_029116873.1	.	NW_011550959.1:268859-278940	887	0	0	0	0	0	0	0	0	0	0	0	0	0	0	0	0	0	0	0	0	0	0	0	0	0	0	0	0	0	0
XM_019846318	105032514	LOC105032514	leucine-rich repeat protein 2, transcript variant X1	mRNA	XP_019701877.2	.	NW_011550959.1:274817-278940	874	0	0	0	0	0	0	0	0	0	0	0	0	0	0	0	0	0	0	0	0	0	0	0	0	0	0	0	0	0	0
XM_029261041	105032515	LOC105032515	uncharacterized protein At2g23090, transcript variant X1	mRNA	XP_029116874.1	.	NW_011550959.1:268630-270789	622	0	0	0	0	0	0	0	0	0	0	0	0	0	0	0	0	0	0	0	0	0	0	0	0	0	0	0	0	0	0
XM_029261042	105032515	LOC105032515	uncharacterized protein At2g23090, transcript variant X8	mRNA	XP_029116875.1	.	NW_011550959.1:268630-272905	553	0	0	0	0	0	0	0	0	0	0	0	0	0	0	0	0	0	0	0	0	0	0	0	0	0	0	0	0	0	0
XM_010906972	105032515	LOC105032515	uncharacterized protein At2g23090, transcript variant X2	mRNA	XP_010905274.1	.	NW_011550959.1:268630-273690	1121	0	0	0	0	0	0	0	0	0	0	0	0	0	0	0	0	0	0	0	0	0	0	0	0	0	0	0	0	0	0
XR_003798726	105032515	LOC105032515	uncharacterized protein At2g23090, transcript variant X3	misc_RNA	.	.	NW_011550959.1:268630-273690	1280	0	0	0	0	0	0	0	0	0	0	0	0	0	0	0	0	0	0	0	0	0	0	0	0	0	0	0	0	0	0
XM_010906975	105032515	LOC105032515	uncharacterized protein At2g23090, transcript variant X7	mRNA	XP_010905277.1	.	NW_011550959.1:268630-273847	1092	0	0	0	0	0	0	0	0	0	0	0	0	0	0	0	0	0	0	0	0	0	0	0	0	0	0	0	0	0	0
XR_002163363	105032515	LOC105032515	uncharacterized protein At2g23090, transcript variant X5	misc_RNA	.	.	NW_011550959.1:268630-273847	1183	0	0	0	0	0	0	0	0	0	0	0	0	0	0	0	0	0	0	0	0	0	0	0	0	0	0	0	0	0	0
XR_002163364	105032515	LOC105032515	uncharacterized protein At2g23090, transcript variant X4	misc_RNA	.	.	NW_011550959.1:268630-273847	1211	0	0	0	0	0	0	0	0	0	0	0	0	0	0	0	0	0	0	0	0	0	0	0	0	0	0	0	0	0	0
XR_002163365	105032515	LOC105032515	uncharacterized protein At2g23090, transcript variant X6	misc_RNA	.	.	NW_011550959.1:268630-273847	1165	0	0	0	0	0	0	0	0	0	0	0	0	0	0	0	0	0	0	0	0	0	0	0	0	0	0	0	0	0	0
XM_010906976	105032516	LOC105032516	casein kinase II subunit alpha-2	mRNA	XP_010905278.1	.	NW_011550959.1:281121-299571	1529	0	0	0	0	0	0	0	0	0	0	0	0	0	0	0	0	0	0	0	0	0	0	0	0	0	0	0	0	0	0
XM_029261039	105032517	LOC105032517	transcription initiation factor TFIID subunit 4b, transcript variant X4	mRNA	XP_029116872.1	.	NW_011550959.1:300517-314973	3095	0	0	0	0	0	0	0	0	0	0	0	0	0	0	0	0	0	0	0	0	0	0	0	0	0	0	0	0	0	0
XM_029261038	105032517	LOC105032517	transcription initiation factor TFIID subunit 4b, transcript variant X3	mRNA	XP_029116871.1	.	NW_011550959.1:300517-315033	3158	0	0	0	0	0	0	0	0	0	0	0	0	0	0	0	0	0	0	0	0	0	0	0	0	0	0	0	0	0	0
XM_010906978	105032517	LOC105032517	transcription initiation factor TFIID subunit 4b, transcript variant X2	mRNA	XP_010905280.1	.	NW_011550959.1:300517-315401	3367	0	0	0	0	0	0	0	0	0	0	0	0	0	0	0	0	0	0	0	0	0	0	0	0	0	0	0	0	0	0
XM_010906977	105032517	LOC105032517	transcription initiation factor TFIID subunit 4b, transcript variant X1	mRNA	XP_010905279.1	.	NW_011550959.1:300517-315427	3396	0	0	0	0	0	0	0	0	0	0	0	0	0	0	0	0	0	0	0	0	0	0	0	0	0	0	0	0	0	0
XM_010906979	105032518	LOC105032518	PXMP2/4 family protein 3	mRNA	XP_010905281.1	.	NW_011550959.1:355907-369859	1286	0	0	0	0	0	0	0	0	0	0	0	0	0	0	0	0	0	0	0	0	0	0	0	0	0	0	0	0	0	0
XM_010906980	105032519	LOC105032519	BTB/POZ domain-containing protein SR1IP1, transcript variant X1	mRNA	XP_010905282.1	.	NW_011550959.1:383656-387615	2254	0	0	0	0	0	0	0	0	0	0	0	0	0	0	0	0	0	0	0	0	0	0	0	0	0	0	0	0	0	0
XM_010906981	105032519	LOC105032519	BTB/POZ domain-containing protein SR1IP1, transcript variant X2	mRNA	XP_010905283.1	.	NW_011550959.1:383769-387615	2167	0	0	0	0	0	0	0	0	0	0	0	0	0	0	0	0	0	0	0	0	0	0	0	0	0	0	0	0	0	0
XM_010906982	105032520	LOC105032520	uncharacterized LOC105032520	mRNA	XP_010905284.1	.	NW_011550959.1:414553-417174	1256	0	0	0	0	0	0	0	0	0	0	0	0	0	0	0	0	0	0	0	0	0	0	0	0	0	0	0	0	0	0
XM_010906985	105032521	LOC105032521	secretory carrier-associated membrane protein 2, transcript variant X1	mRNA	XP_010905287.1	.	chr1:62060590-62071325	1556	85	111	363	379	451	103	183	568	549	136	2.75588	3.69841	51.6682	48.6717	46.7025	3.33568	5.29877	76.4502	80.1179	4.32155	3.8104	5.17647	96.8307	84.0526	83.1948	4.09787	6.96418	150.578	151.1	5.44176
XM_029260995	105032521	LOC105032521	secretory carrier-associated membrane protein 2, transcript variant X2	mRNA	XP_029116828.1	.	chr1:62061846-62071326	2565	0	0	0	0	0	0	0	0	0	0	0	0	0	0	0	0	0	0	0	0	0	0	0	0	0	0	0	0	0	0
XM_010906983	105032523	LOC105032523	peroxidase 35	mRNA	XP_010905285.1	.	NW_011550959.1:610002-614196	1707	0	0	0	0	0	0	0	0	0	0	0	0	0	0	0	0	0	0	0	0	0	0	0	0	0	0	0	0	0	0
XM_010906984	105032524	LOC105032524	uncharacterized LOC105032524	mRNA	XP_010905286.1	.	NW_011550959.1:673085-674171	578	0	0	0	0	0	0	0	0	0	0	0	0	0	0	0	0	0	0	0	0	0	0	0	0	0	0	0	0	0	0
XR_829826	105032525	LOC105032525	uncharacterized LOC105032525	ncRNA	.	.	NW_011550959.1:685925-686631	465	0	0	0	0	0	0	0	0	0	0	0	0	0	0	0	0	0	0	0	0	0	0	0	0	0	0	0	0	0	0
XM_010906986	105032526	LOC105032526	FAD-linked sulfhydryl oxidase ERV1	mRNA	XP_010905288.1	.	NW_011550959.1:695444-707277	1078	0	0	0	0	0	0	0	0	0	0	0	0	0	0	0	0	0	0	0	0	0	0	0	0	0	0	0	0	0	0
XM_029261035	105032527	LOC105032527	scarecrow-like protein 32	mRNA	XP_029116868.1	.	NW_011550959.1:747677-749348	1672	0	0	0	0	0	0	0	0	0	0	0	0	0	0	0	0	0	0	0	0	0	0	0	0	0	0	0	0	0	0
XM_010906989	105032528	LOC105032528	uncharacterized LOC105032528	mRNA	XP_010905291.1	.	NW_011550959.1:778022-781557	854	0	0	0	0	0	0	0	0	0	0	0	0	0	0	0	0	0	0	0	0	0	0	0	0	0	0	0	0	0	0
XM_010906990	105032529	LOC105032529	LOB domain-containing protein 37-like	mRNA	XP_010905292.1	.	NW_011550959.1:877686-878775	994	0	0	0	0	0	0	0	0	0	0	0	0	0	0	0	0	0	0	0	0	0	0	0	0	0	0	0	0	0	0
XM_010906991	105032530	LOC105032530	glycine-rich cell wall structural protein 1-like	mRNA	XP_010905293.1	.	NW_011550959.1:231000-231626	627	0	0	0	0	0	0	0	0	0	0	0	0	0	0	0	0	0	0	0	0	0	0	0	0	0	0	0	0	0	0
XM_010907008	105032531	LOC105032531	brefeldin A-inhibited guanine nucleotide-exchange protein 5, transcript variant X2	mRNA	XP_010905310.1	.	chr1:62073001-62094675	6254	1322	1270	2914	2939	4148	1198	1240	3556	2949	1242	10.7736	10.5795	103.348	94.0441	106.898	9.65053	8.93509	119.107	107.206	9.82001	14.8961	14.8076	193.684	162.407	190.426	11.8557	11.7434	234.596	202.187	12.3655
XM_029260996	105032531	LOC105032531	brefeldin A-inhibited guanine nucleotide-exchange protein 5, transcript variant X1	mRNA	XP_029116829.1	.	chr1:62073001-62094675	6269	0	0	0	0	0	0	0	0	0	0	0	0	0	0	0	0	0	0	0	0	0	0	0	0	0	0	0	0	0	0
XM_029260999	105032531	LOC105032531	brefeldin A-inhibited guanine nucleotide-exchange protein 5, transcript variant X3	mRNA	XP_029116832.1	.	chr1:62073001-62094676	6159	73	200	611	496	637	19	0	207	252	191	0.599615	1.69219	21.9802	16.1133	16.6587	0.154423	0	7.02856	9.26975	1.53218	0.829054	2.36847	41.1929	27.8266	29.6755	0.189708	0	13.8436	17.4824	1.92935
XM_029261036	105032532	LOC105032532	uncharacterized LOC105032532	mRNA	XP_029116869.1	.	NW_011550959.1:350629-351963	570	0	0	0	0	0	0	0	0	0	0	0	0	0	0	0	0	0	0	0	0	0	0	0	0	0	0	0	0	0	0
XM_010906992	105032533	LOC105032533	QWRF motif-containing protein 2	mRNA	XP_010905294.3	.	NW_011550959.1:824602-841726	2088	0	0	0	0	0	0	0	0	0	0	0	0	0	0	0	0	0	0	0	0	0	0	0	0	0	0	0	0	0	0
XM_010906993	105032534	LOC105032534	scopoletin glucosyltransferase	mRNA	XP_010905295.1	.	NW_011550960.1:154669-156610	1942	0	0	0	0	0	0	0	0	0	0	0	0	0	0	0	0	0	0	0	0	0	0	0	0	0	0	0	0	0	0
XM_010906995	105032535	LOC105032535	equilibrative nucleotide transporter 1	mRNA	XP_010905297.1	.	NW_011550960.1:265329-267874	1636	0	0	0	0	0	0	0	0	0	0	0	0	0	0	0	0	0	0	0	0	0	0	0	0	0	0	0	0	0	0
gene-LOC105032536	105032536	LOC105032536	.	Gene	.	.	NW_011550960.1:360684-369448	1300	0	0	0	0	0	0	0	0	0	0	0	0	0	0	0	0	0	0	0	0	0	0	0	0	0	0	0	0	0	0
XR_003798728	105032538	LOC105032538	uncharacterized LOC105032538, transcript variant X2	misc_RNA	.	.	NW_011550960.1:573382-609947	849	0	0	0	0	0	0	0	0	0	0	0	0	0	0	0	0	0	0	0	0	0	0	0	0	0	0	0	0	0	0
XR_003798729	105032538	LOC105032538	uncharacterized LOC105032538, transcript variant X3	misc_RNA	.	.	NW_011550960.1:573382-609947	846	0	0	0	0	0	0	0	0	0	0	0	0	0	0	0	0	0	0	0	0	0	0	0	0	0	0	0	0	0	0
XR_003798730	105032538	LOC105032538	uncharacterized LOC105032538, transcript variant X4	misc_RNA	.	.	NW_011550960.1:573382-609947	816	0	0	0	0	0	0	0	0	0	0	0	0	0	0	0	0	0	0	0	0	0	0	0	0	0	0	0	0	0	0
XR_003798731	105032538	LOC105032538	uncharacterized LOC105032538, transcript variant X5	misc_RNA	.	.	NW_011550960.1:573382-609947	813	0	0	0	0	0	0	0	0	0	0	0	0	0	0	0	0	0	0	0	0	0	0	0	0	0	0	0	0	0	0
XM_029261044	105032538	LOC105032538	uncharacterized LOC105032538, transcript variant X1	mRNA	XP_029116877.1	.	NW_011550960.1:573382-619932	2282	0	0	0	0	0	0	0	0	0	0	0	0	0	0	0	0	0	0	0	0	0	0	0	0	0	0	0	0	0	0
XM_029261045	105032539	LOC105032539	scarecrow-like protein 21, transcript variant X1	mRNA	XP_029116878.1	.	NW_011550960.1:993651-998639	2244	0	0	0	0	0	0	0	0	0	0	0	0	0	0	0	0	0	0	0	0	0	0	0	0	0	0	0	0	0	0
XM_029261046	105032539	LOC105032539	scarecrow-like protein 21, transcript variant X2	mRNA	XP_029116879.1	.	NW_011550960.1:994008-998639	2361	0	0	0	0	0	0	0	0	0	0	0	0	0	0	0	0	0	0	0	0	0	0	0	0	0	0	0	0	0	0
XM_029261047	105032540	LOC105032540	WRKY transcription factor SUSIBA2, transcript variant X2	mRNA	XP_029116880.1	.	NW_011550960.1:1056484-1081987	2050	0	0	0	0	0	0	0	0	0	0	0	0	0	0	0	0	0	0	0	0	0	0	0	0	0	0	0	0	0	0
XM_019846324	105032540	LOC105032540	WRKY transcription factor SUSIBA2, transcript variant X3	mRNA	XP_019701883.1	.	NW_011550960.1:1056484-1082050	2068	0	0	0	0	0	0	0	0	0	0	0	0	0	0	0	0	0	0	0	0	0	0	0	0	0	0	0	0	0	0
XM_010906999	105032540	LOC105032540	WRKY transcription factor SUSIBA2, transcript variant X1	mRNA	XP_010905301.1	.	NW_011550960.1:1056484-1082319	2330	0	0	0	0	0	0	0	0	0	0	0	0	0	0	0	0	0	0	0	0	0	0	0	0	0	0	0	0	0	0
XM_019846325	105032540	LOC105032540	WRKY transcription factor SUSIBA2, transcript variant X4	mRNA	XP_019701884.1	.	NW_011550960.1:1057488-1082320	1700	0	0	0	0	0	0	0	0	0	0	0	0	0	0	0	0	0	0	0	0	0	0	0	0	0	0	0	0	0	0
XM_010907001	105032541	LOC105032541	acetylornithine aminotransferase, mitochondrial, transcript variant X1	mRNA	XP_010905303.1	.	NW_011550960.1:1094591-1101488	2197	0	0	0	0	0	0	0	0	0	0	0	0	0	0	0	0	0	0	0	0	0	0	0	0	0	0	0	0	0	0
XM_010907002	105032541	LOC105032541	acetylornithine aminotransferase, mitochondrial, transcript variant X2	mRNA	XP_010905304.1	.	NW_011550960.1:1094591-1101488	2086	0	0	0	0	0	0	0	0	0	0	0	0	0	0	0	0	0	0	0	0	0	0	0	0	0	0	0	0	0	0
XM_010907004	105032542	LOC105032542	uncharacterized LOC105032542	mRNA	XP_010905306.2	.	NW_011550960.1:233320-235392	2073	0	0	0	0	0	0	0	0	0	0	0	0	0	0	0	0	0	0	0	0	0	0	0	0	0	0	0	0	0	0
XM_010907005	105032543	LOC105032543	PTI1-like tyrosine-protein kinase At3g15890	mRNA	XP_010905307.2	.	NW_011550960.1:774697-776626	1648	0	0	0	0	0	0	0	0	0	0	0	0	0	0	0	0	0	0	0	0	0	0	0	0	0	0	0	0	0	0
XM_019846326	105032544	LOC105032544	uncharacterized LOC105032544, transcript variant X1	mRNA	XP_019701885.1	.	NW_011550961.1:453257-482288	1482	0	0	0	0	0	0	0	0	0	0	0	0	0	0	0	0	0	0	0	0	0	0	0	0	0	0	0	0	0	0
XM_019846327	105032544	LOC105032544	uncharacterized LOC105032544, transcript variant X2	mRNA	XP_019701886.1	.	NW_011550961.1:453692-482288	1069	0	0	0	0	0	0	0	0	0	0	0	0	0	0	0	0	0	0	0	0	0	0	0	0	0	0	0	0	0	0
XM_029261048	105032545	LOC105032545	NDR1/HIN1-like protein 12	mRNA	XP_029116881.1	.	NW_011550961.1:782990-783595	606	0	0	0	0	0	0	0	0	0	0	0	0	0	0	0	0	0	0	0	0	0	0	0	0	0	0	0	0	0	0
XM_019846328	105032546	LOC105032546	uncharacterized LOC105032546	mRNA	XP_019701887.1	.	NW_011550961.1:781030-784857	1656	0	0	0	0	0	0	0	0	0	0	0	0	0	0	0	0	0	0	0	0	0	0	0	0	0	0	0	0	0	0
XM_010907012	105032547	LOC105032547	pentatricopeptide repeat-containing protein At5g42310, chloroplastic, transcript variant X3	mRNA	XP_010905314.1	.	NW_011550961.1:1171247-1179121	2805	0	0	0	0	0	0	0	0	0	0	0	0	0	0	0	0	0	0	0	0	0	0	0	0	0	0	0	0	0	0
XM_010907010	105032547	LOC105032547	pentatricopeptide repeat-containing protein At5g42310, chloroplastic, transcript variant X1	mRNA	XP_010905312.1	.	NW_011550961.1:1171250-1179121	2874	0	0	0	0	0	0	0	0	0	0	0	0	0	0	0	0	0	0	0	0	0	0	0	0	0	0	0	0	0	0
XM_010907011	105032547	LOC105032547	pentatricopeptide repeat-containing protein At5g42310, chloroplastic, transcript variant X2	mRNA	XP_010905313.1	.	NW_011550961.1:1171250-1179121	2686	0	0	0	0	0	0	0	0	0	0	0	0	0	0	0	0	0	0	0	0	0	0	0	0	0	0	0	0	0	0
XM_010907013	105032548	LOC105032548	ricin-like	mRNA	XP_010905315.1	.	NW_011550961.1:217193-218887	1695	0	0	0	0	0	0	0	0	0	0	0	0	0	0	0	0	0	0	0	0	0	0	0	0	0	0	0	0	0	0
XM_010907014	105032549	LOC105032549	E3 ubiquitin-protein ligase RGLG3, transcript variant X1	mRNA	XP_010905316.1	.	NW_011550962.1:294365-347134	1888	0	0	0	0	0	0	0	0	0	0	0	0	0	0	0	0	0	0	0	0	0	0	0	0	0	0	0	0	0	0
XM_010907015	105032549	LOC105032549	E3 ubiquitin-protein ligase RGLG3, transcript variant X2	mRNA	XP_010905317.1	.	NW_011550962.1:294365-347134	1894	0	0	0	0	0	0	0	0	0	0	0	0	0	0	0	0	0	0	0	0	0	0	0	0	0	0	0	0	0	0
XM_019846329	105032551	LOC105032551	PHD finger protein EHD3, transcript variant X3	mRNA	XP_019701888.1	.	NW_011550962.1:519267-531458	2808	0	0	0	0	0	0	0	0	0	0	0	0	0	0	0	0	0	0	0	0	0	0	0	0	0	0	0	0	0	0
XM_019846331	105032551	LOC105032551	PHD finger protein EHD3, transcript variant X4	mRNA	XP_019701890.1	.	NW_011550962.1:519267-542500	2559	0	0	0	0	0	0	0	0	0	0	0	0	0	0	0	0	0	0	0	0	0	0	0	0	0	0	0	0	0	0
XM_019846332	105032551	LOC105032551	PHD finger protein EHD3, transcript variant X5	mRNA	XP_019701891.1	.	NW_011550962.1:519267-542500	2556	0	0	0	0	0	0	0	0	0	0	0	0	0	0	0	0	0	0	0	0	0	0	0	0	0	0	0	0	0	0
XM_010907017	105032551	LOC105032551	PHD finger protein EHD3, transcript variant X1	mRNA	XP_010905319.1	.	NW_011550962.1:519267-542502	3038	0	0	0	0	0	0	0	0	0	0	0	0	0	0	0	0	0	0	0	0	0	0	0	0	0	0	0	0	0	0
XM_010907018	105032551	LOC105032551	PHD finger protein EHD3, transcript variant X2	mRNA	XP_010905320.1	.	NW_011550962.1:519267-542502	3035	0	0	0	0	0	0	0	0	0	0	0	0	0	0	0	0	0	0	0	0	0	0	0	0	0	0	0	0	0	0
XM_010907019	105032552	LOC105032552	ubinuclein-1-like	mRNA	XP_010905321.1	.	NW_011550962.1:616464-638108	2586	0	0	0	0	0	0	0	0	0	0	0	0	0	0	0	0	0	0	0	0	0	0	0	0	0	0	0	0	0	0
XM_010907020	105032553	LOC105032553	1-aminocyclopropane-1-carboxylate oxidase	mRNA	XP_010905322.1	.	NW_011550962.1:799725-801928	1273	0	0	0	0	0	0	0	0	0	0	0	0	0	0	0	0	0	0	0	0	0	0	0	0	0	0	0	0	0	0
XM_010907021	105032554	LOC105032554	RNA polymerase II transcriptional coactivator KIWI	mRNA	XP_010905323.1	.	NW_011550962.1:864886-869263	700	0	0	0	0	0	0	0	0	0	0	0	0	0	0	0	0	0	0	0	0	0	0	0	0	0	0	0	0	0	0
XM_019846334	105032555	GLO2	MADS-box transcription factor 2, transcript variant X1	mRNA	XP_019701893.1	.	NW_011550962.1:1096272-1098648	1077	0	0	0	0	0	0	0	0	0	0	0	0	0	0	0	0	0	0	0	0	0	0	0	0	0	0	0	0	0	0
XM_010907022	105032555	GLO2	MADS-box transcription factor 2, transcript variant X2	mRNA	XP_010905324.1	.	NW_011550962.1:1096278-1098648	1005	0	0	0	0	0	0	0	0	0	0	0	0	0	0	0	0	0	0	0	0	0	0	0	0	0	0	0	0	0	0
XM_010907023	105032556	LOC105032556	uncharacterized LOC105032556	mRNA	XP_010905325.1	.	NW_011550962.1:1116970-1117745	776	0	0	0	0	0	0	0	0	0	0	0	0	0	0	0	0	0	0	0	0	0	0	0	0	0	0	0	0	0	0
XM_029261010	105032557	LOC105032557	uncharacterized LOC105032557, transcript variant X3	mRNA	XP_029116843.1	.	chr1:62096344-62105163	1832	0	0	0	1	0	0	0	0	1	0	0	0	0	0.078396	0	0	0	0	0.101746	0	0	0	0	0.135384	0	0	0	0	0.19189	0
XM_010907059	105032557	LOC105032557	uncharacterized LOC105032557, transcript variant X5	mRNA	XP_010905361.1	.	chr1:62096344-62105165	3168	41	25	125	164	131	38	50	267	215	56	0.647991	0.406956	8.74003	10.3291	6.61571	0.594003	0.705133	17.6356	15.3909	0.872892	0.895941	0.569595	16.3796	17.8377	11.7851	0.729732	0.926757	34.7355	29.0267	1.09916
XM_029261001	105032557	LOC105032557	uncharacterized LOC105032557, transcript variant X1	mRNA	XP_029116834.1	.	chr1:62096344-62105168	1846	0	2	0	27	16	24	9	60	64	0	0	0.046693	0	2.83502	1.34814	0.632134	0.214764	6.75349	7.76474	0	0	0.065354	0	4.89588	2.40154	0.776576	0.282265	13.3018	14.644	0
XM_029261004	105032557	LOC105032557	uncharacterized LOC105032557, transcript variant X2	mRNA	XP_029116837.1	.	chr1:62096344-62105171	1863	1	0	0	1	1	1	0	1	0	6	0.01173	0	0	0.000237	0.00231	0.001214	0	0.001252	0	0.138996	0.016219	0	0	0.00041	0.004115	0.001491	0	0.002465	0	0.175025
XM_010907050	105032557	LOC105032557	uncharacterized LOC105032557, transcript variant X4	mRNA	XP_010905352.1	.	chr1:62096344-62109081	1577	0	0	0	0	0	0	0	0	0	0	0	0	0	0	0	0	0	0	0	0	0	0	0	0	0	0	0	0	0	0
gene-LOC105032559	105032559	LOC105032559	.	Gene	.	.	NW_011550962.1:863074-864058	861	0	0	0	0	0	0	0	0	0	0	0	0	0	0	0	0	0	0	0	0	0	0	0	0	0	0	0	0	0	0
XM_010907025	105032560	LOC105032560	mitogen-activated protein kinase kinase kinase 5, transcript variant X1	mRNA	XP_010905327.1	.	NW_011550962.1:883065-887370	2843	0	0	0	0	0	0	0	0	0	0	0	0	0	0	0	0	0	0	0	0	0	0	0	0	0	0	0	0	0	0
XM_029261049	105032560	LOC105032560	mitogen-activated protein kinase kinase kinase 5, transcript variant X2	mRNA	XP_029116882.1	.	NW_011550962.1:883332-887370	2564	0	0	0	0	0	0	0	0	0	0	0	0	0	0	0	0	0	0	0	0	0	0	0	0	0	0	0	0	0	0
XR_002163367	105032561	LOC105032561	uncharacterized LOC105032561, transcript variant X2	ncRNA	.	.	NW_011550963.1:271954-275638	737	0	0	0	0	0	0	0	0	0	0	0	0	0	0	0	0	0	0	0	0	0	0	0	0	0	0	0	0	0	0
XR_003798737	105032561	LOC105032561	uncharacterized LOC105032561, transcript variant X1	ncRNA	.	.	NW_011550963.1:271954-275638	978	0	0	0	0	0	0	0	0	0	0	0	0	0	0	0	0	0	0	0	0	0	0	0	0	0	0	0	0	0	0
XM_010907027	105032562	LOC105032562	L-type lectin-domain containing receptor kinase IX.1, transcript variant X1	mRNA	XP_010905329.1	.	NW_011550963.1:461875-465825	2405	0	0	0	0	0	0	0	0	0	0	0	0	0	0	0	0	0	0	0	0	0	0	0	0	0	0	0	0	0	0
XM_010907028	105032562	LOC105032562	L-type lectin-domain containing receptor kinase IX.1, transcript variant X2	mRNA	XP_010905330.1	.	NW_011550963.1:461876-465825	2293	0	0	0	0	0	0	0	0	0	0	0	0	0	0	0	0	0	0	0	0	0	0	0	0	0	0	0	0	0	0
XM_010907029	105032563	LOC105032563	vacuolar cation/proton exchanger 1a, transcript variant X1	mRNA	XP_010905331.1	.	NW_011550963.1:509706-514808	1997	0	0	0	0	0	0	0	0	0	0	0	0	0	0	0	0	0	0	0	0	0	0	0	0	0	0	0	0	0	0
XM_010907030	105032563	LOC105032563	vacuolar cation/proton exchanger 1a, transcript variant X2	mRNA	XP_010905332.1	.	NW_011550963.1:509706-514808	2050	0	0	0	0	0	0	0	0	0	0	0	0	0	0	0	0	0	0	0	0	0	0	0	0	0	0	0	0	0	0
XM_010907031	105032564	LOC105032564	calmodulin-binding receptor-like cytoplasmic kinase 3, transcript variant X1	mRNA	XP_010905333.1	.	NW_011550963.1:645607-655620	2257	0	0	0	0	0	0	0	0	0	0	0	0	0	0	0	0	0	0	0	0	0	0	0	0	0	0	0	0	0	0
XR_003798738	105032564	LOC105032564	calmodulin-binding receptor-like cytoplasmic kinase 3, transcript variant X2	misc_RNA	.	.	NW_011550963.1:645607-655824	2321	0	0	0	0	0	0	0	0	0	0	0	0	0	0	0	0	0	0	0	0	0	0	0	0	0	0	0	0	0	0
XM_010907032	105032564	LOC105032564	calmodulin-binding receptor-like cytoplasmic kinase 3, transcript variant X3	mRNA	XP_010905334.1	.	NW_011550963.1:645608-655620	2244	0	0	0	0	0	0	0	0	0	0	0	0	0	0	0	0	0	0	0	0	0	0	0	0	0	0	0	0	0	0
XM_010907036	105032565	LOC105032565	putative chloride channel-like protein CLC-g, transcript variant X2	mRNA	XP_010905338.1	.	NW_011550963.1:656586-661137	2800	0	0	0	0	0	0	0	0	0	0	0	0	0	0	0	0	0	0	0	0	0	0	0	0	0	0	0	0	0	0
XM_010907037	105032565	LOC105032565	putative chloride channel-like protein CLC-g, transcript variant X3	mRNA	XP_010905339.1	.	NW_011550963.1:656586-661137	2793	0	0	0	0	0	0	0	0	0	0	0	0	0	0	0	0	0	0	0	0	0	0	0	0	0	0	0	0	0	0
XM_010907038	105032565	LOC105032565	putative chloride channel-like protein CLC-g, transcript variant X4	mRNA	XP_010905340.1	.	NW_011550963.1:656586-661190	2981	0	0	0	0	0	0	0	0	0	0	0	0	0	0	0	0	0	0	0	0	0	0	0	0	0	0	0	0	0	0
XM_010907034	105032565	LOC105032565	putative chloride channel-like protein CLC-g, transcript variant X1	mRNA	XP_010905336.1	.	NW_011550963.1:656586-661415	3150	0	0	0	0	0	0	0	0	0	0	0	0	0	0	0	0	0	0	0	0	0	0	0	0	0	0	0	0	0	0
XM_019846338	105032566	LOC105032566	synaptotagmin-5, transcript variant X1	mRNA	XP_019701897.1	.	NW_011550963.1:713267-728553	2292	0	0	0	0	0	0	0	0	0	0	0	0	0	0	0	0	0	0	0	0	0	0	0	0	0	0	0	0	0	0
XM_029261051	105032566	LOC105032566	synaptotagmin-5, transcript variant X2	mRNA	XP_029116884.1	.	NW_011550963.1:713289-728553	2246	0	0	0	0	0	0	0	0	0	0	0	0	0	0	0	0	0	0	0	0	0	0	0	0	0	0	0	0	0	0
XM_029261052	105032567	LOC105032567	synaptotagmin-5-like	mRNA	XP_029116885.1	.	NW_011550963.1:746406-784005	2355	0	0	0	0	0	0	0	0	0	0	0	0	0	0	0	0	0	0	0	0	0	0	0	0	0	0	0	0	0	0
XM_010907039	105032569	LOC105032569	protein TSS	mRNA	XP_010905341.1	.	NW_011550963.1:863156-888394	5797	0	0	0	0	0	0	0	0	0	0	0	0	0	0	0	0	0	0	0	0	0	0	0	0	0	0	0	0	0	0
XM_029261053	105032570	LOC105032570	VQ motif-containing protein 11	mRNA	XP_029116886.1	.	NW_011550963.1:912378-913351	974	0	0	0	0	0	0	0	0	0	0	0	0	0	0	0	0	0	0	0	0	0	0	0	0	0	0	0	0	0	0
XM_010907042	105032571	LOC105032571	L-type lectin-domain containing receptor kinase IX.1-like	mRNA	XP_010905344.1	.	NW_011550963.1:1510-11584	1998	0	0	0	0	0	0	0	0	0	0	0	0	0	0	0	0	0	0	0	0	0	0	0	0	0	0	0	0	0	0
gene-LOC105032572	105032572	LOC105032572	.	Gene	.	.	NW_011550963.1:49780-56513	2001	0	0	0	0	0	0	0	0	0	0	0	0	0	0	0	0	0	0	0	0	0	0	0	0	0	0	0	0	0	0
XM_010907043	105032573	LOC105032573	L-type lectin-domain containing receptor kinase IX.1-like	mRNA	XP_010905345.1	.	NW_011550963.1:278683-352338	795	0	0	0	0	0	0	0	0	0	0	0	0	0	0	0	0	0	0	0	0	0	0	0	0	0	0	0	0	0	0
XM_010907044	105032574	LOC105032574	glycine-rich cell wall structural protein 2-like	mRNA	XP_010905346.1	.	NW_011550963.1:375522-375941	420	0	0	0	0	0	0	0	0	0	0	0	0	0	0	0	0	0	0	0	0	0	0	0	0	0	0	0	0	0	0
XM_029261050	105032575	LOC105032575	pentatricopeptide repeat-containing protein At5g08305	mRNA	XP_029116883.1	.	NW_011550963.1:640863-641863	1000	0	0	0	0	0	0	0	0	0	0	0	0	0	0	0	0	0	0	0	0	0	0	0	0	0	0	0	0	0	0
XM_010907047	105032576	LOC105032576	uncharacterized LOC105032576	mRNA	XP_010905349.1	.	NW_011550963.1:671556-672679	768	0	0	0	0	0	0	0	0	0	0	0	0	0	0	0	0	0	0	0	0	0	0	0	0	0	0	0	0	0	0
XM_019846337	105032577	LOC105032577	subtilisin-like protease SBT1.6	mRNA	XP_019701896.2	.	NW_011550963.1:890436-891739	1188	0	0	0	0	0	0	0	0	0	0	0	0	0	0	0	0	0	0	0	0	0	0	0	0	0	0	0	0	0	0
gene-LOC105032578	105032578	LOC105032578	.	Gene	.	.	NW_011550963.1:1005822-1042581	652	0	0	0	0	0	0	0	0	0	0	0	0	0	0	0	0	0	0	0	0	0	0	0	0	0	0	0	0	0	0
XM_010907049	105032579	LOC105032579	arginyl-tRNA--protein transferase 2	mRNA	XP_010905351.1	.	NW_011550964.1:2344-10886	2482	0	0	0	0	0	0	0	0	0	0	0	0	0	0	0	0	0	0	0	0	0	0	0	0	0	0	0	0	0	0
XM_010907051	105032580	LOC105032580	probable LRR receptor-like serine/threonine-protein kinase At3g47570	mRNA	XP_010905353.1	.	NW_011550964.1:128761-132431	3532	0	0	0	0	0	0	0	0	0	0	0	0	0	0	0	0	0	0	0	0	0	0	0	0	0	0	0	0	0	0
XM_010907054	105032581	LOC105032581	anthranilate synthase alpha subunit 1, chloroplastic, transcript variant X5	mRNA	XP_010905356.1	.	NW_011550964.1:410004-421352	2261	0	0	0	0	0	0	0	0	0	0	0	0	0	0	0	0	0	0	0	0	0	0	0	0	0	0	0	0	0	0
XM_029261054	105032581	LOC105032581	anthranilate synthase alpha subunit 1, chloroplastic, transcript variant X1	mRNA	XP_029116887.1	.	NW_011550964.1:410004-421354	2320	0	0	0	0	0	0	0	0	0	0	0	0	0	0	0	0	0	0	0	0	0	0	0	0	0	0	0	0	0	0
XM_029261057	105032581	LOC105032581	anthranilate synthase alpha subunit 1, chloroplastic, transcript variant X4	mRNA	XP_029116890.1	.	NW_011550964.1:410004-421356	2313	0	0	0	0	0	0	0	0	0	0	0	0	0	0	0	0	0	0	0	0	0	0	0	0	0	0	0	0	0	0
XM_029261055	105032581	LOC105032581	anthranilate synthase alpha subunit 1, chloroplastic, transcript variant X2	mRNA	XP_029116888.1	.	NW_011550964.1:410004-421707	2546	0	0	0	0	0	0	0	0	0	0	0	0	0	0	0	0	0	0	0	0	0	0	0	0	0	0	0	0	0	0
XM_029261056	105032581	LOC105032581	anthranilate synthase alpha subunit 1, chloroplastic, transcript variant X3	mRNA	XP_029116889.1	.	NW_011550964.1:410004-421707	2438	0	0	0	0	0	0	0	0	0	0	0	0	0	0	0	0	0	0	0	0	0	0	0	0	0	0	0	0	0	0
XM_010907056	105032582	LOC105032582	peroxisomal nicotinamide adenine dinucleotide carrier, transcript variant X1	mRNA	XP_010905358.1	.	NW_011550964.1:421889-428171	1621	0	0	0	0	0	0	0	0	0	0	0	0	0	0	0	0	0	0	0	0	0	0	0	0	0	0	0	0	0	0
XM_029261058	105032582	LOC105032582	peroxisomal nicotinamide adenine dinucleotide carrier, transcript variant X2	mRNA	XP_029116891.1	.	NW_011550964.1:421890-428171	1545	0	0	0	0	0	0	0	0	0	0	0	0	0	0	0	0	0	0	0	0	0	0	0	0	0	0	0	0	0	0
XM_010907057	105032583	LOC105032583	coronatine-insensitive protein homolog 1a	mRNA	XP_010905359.1	.	NW_011550964.1:463620-470506	2401	0	0	0	0	0	0	0	0	0	0	0	0	0	0	0	0	0	0	0	0	0	0	0	0	0	0	0	0	0	0
XM_010907060	105032584	LOC105032584	transcription factor DIVARICATA	mRNA	XP_010905362.1	.	NW_011550964.1:547843-550135	1957	0	0	0	0	0	0	0	0	0	0	0	0	0	0	0	0	0	0	0	0	0	0	0	0	0	0	0	0	0	0
XM_010907061	105032585	LOC105032585	protein OCTOPUS-like	mRNA	XP_010905363.1	.	NW_011550964.1:614829-616953	2125	0	0	0	0	0	0	0	0	0	0	0	0	0	0	0	0	0	0	0	0	0	0	0	0	0	0	0	0	0	0
XM_010907062	105032586	LOC105032586	uncharacterized LOC105032586, transcript variant X1	mRNA	XP_010905364.1	.	NW_011550964.1:636634-649240	815	0	0	0	0	0	0	0	0	0	0	0	0	0	0	0	0	0	0	0	0	0	0	0	0	0	0	0	0	0	0
XM_010907063	105032586	LOC105032586	uncharacterized LOC105032586, transcript variant X2	mRNA	XP_010905365.1	.	NW_011550964.1:644058-649267	726	0	0	0	0	0	0	0	0	0	0	0	0	0	0	0	0	0	0	0	0	0	0	0	0	0	0	0	0	0	0
XM_010907065	105032587	LOC105032587	reticulon-like protein B12, transcript variant X2	mRNA	XP_010905367.1	.	NW_011550964.1:651745-662970	1351	0	0	0	0	0	0	0	0	0	0	0	0	0	0	0	0	0	0	0	0	0	0	0	0	0	0	0	0	0	0
XM_010907064	105032587	LOC105032587	reticulon-like protein B12, transcript variant X1	mRNA	XP_010905366.1	.	NW_011550964.1:651746-662970	1356	0	0	0	0	0	0	0	0	0	0	0	0	0	0	0	0	0	0	0	0	0	0	0	0	0	0	0	0	0	0
XM_010907066	105032588	LOC105032588	O-fucosyltransferase 19	mRNA	XP_010905368.1	.	NW_011550964.1:671917-675704	2168	0	0	0	0	0	0	0	0	0	0	0	0	0	0	0	0	0	0	0	0	0	0	0	0	0	0	0	0	0	0
XM_010907070	105032589	LOC105032589	probable proline transporter 2, transcript variant X3	mRNA	XP_010905372.1	.	NW_011550964.1:676256-684061	1688	0	0	0	0	0	0	0	0	0	0	0	0	0	0	0	0	0	0	0	0	0	0	0	0	0	0	0	0	0	0
XM_019846358	105032589	LOC105032589	probable proline transporter 2, transcript variant X4	mRNA	XP_019701917.1	.	NW_011550964.1:676266-683273	1433	0	0	0	0	0	0	0	0	0	0	0	0	0	0	0	0	0	0	0	0	0	0	0	0	0	0	0	0	0	0
XM_019846359	105032589	LOC105032589	probable proline transporter 2, transcript variant X6	mRNA	XP_019701918.1	.	NW_011550964.1:676293-684055	1867	0	0	0	0	0	0	0	0	0	0	0	0	0	0	0	0	0	0	0	0	0	0	0	0	0	0	0	0	0	0
XM_010907068	105032589	LOC105032589	probable proline transporter 2, transcript variant X1	mRNA	XP_010905370.1	.	NW_011550964.1:676293-684319	1900	0	0	0	0	0	0	0	0	0	0	0	0	0	0	0	0	0	0	0	0	0	0	0	0	0	0	0	0	0	0
XM_010907069	105032589	LOC105032589	probable proline transporter 2, transcript variant X2	mRNA	XP_010905371.1	.	NW_011550964.1:676293-684319	1877	0	0	0	0	0	0	0	0	0	0	0	0	0	0	0	0	0	0	0	0	0	0	0	0	0	0	0	0	0	0
XR_002163385	105032589	LOC105032589	probable proline transporter 2, transcript variant X5	misc_RNA	.	.	NW_011550964.1:676671-684061	1627	0	0	0	0	0	0	0	0	0	0	0	0	0	0	0	0	0	0	0	0	0	0	0	0	0	0	0	0	0	0
XM_010907072	105032590	LOC105032590	uncharacterized LOC105032590	mRNA	XP_010905374.1	.	chr1:62110128-62116248	1897	17	6	18	14	28	3	15	38	14	8	0.439781	0.14956	2.01216	1.41085	2.322	0.065825	0.33712	4.16718	1.5851	0.197769	0.608061	0.209331	3.77096	2.43643	4.13636	0.080866	0.443077	8.20777	2.98944	0.249033
XM_010907071	105032591	LOC105032591	tubulin beta-2 chain	mRNA	XP_010905373.2	.	NW_011550964.1:741149-743341	1732	0	0	0	0	0	0	0	0	0	0	0	0	0	0	0	0	0	0	0	0	0	0	0	0	0	0	0	0	0	0
XM_010907073	105032592	LOC105032592	uncharacterized LOC105032592	mRNA	XP_010905375.1	.	NW_011550964.1:744311-749315	1510	0	0	0	0	0	0	0	0	0	0	0	0	0	0	0	0	0	0	0	0	0	0	0	0	0	0	0	0	0	0
XM_010907074	105032593	LOC105032593	uncharacterized LOC105032593	mRNA	XP_010905376.1	.	NW_011550964.1:762897-765294	1043	0	0	0	0	0	0	0	0	0	0	0	0	0	0	0	0	0	0	0	0	0	0	0	0	0	0	0	0	0	0
XR_002163381	105032594	LOC105032594	serine/threonine-protein kinase BSK5, transcript variant X9	misc_RNA	.	.	NW_011550964.1:809857-819694	2731	0	0	0	0	0	0	0	0	0	0	0	0	0	0	0	0	0	0	0	0	0	0	0	0	0	0	0	0	0	0
XR_002163374	105032594	LOC105032594	serine/threonine-protein kinase BSK5, transcript variant X4	misc_RNA	.	.	NW_011550964.1:809857-819810	2823	0	0	0	0	0	0	0	0	0	0	0	0	0	0	0	0	0	0	0	0	0	0	0	0	0	0	0	0	0	0
XR_002163376	105032594	LOC105032594	serine/threonine-protein kinase BSK5, transcript variant X7	misc_RNA	.	.	NW_011550964.1:809857-819810	2943	0	0	0	0	0	0	0	0	0	0	0	0	0	0	0	0	0	0	0	0	0	0	0	0	0	0	0	0	0	0
XR_002163377	105032594	LOC105032594	serine/threonine-protein kinase BSK5, transcript variant X5	misc_RNA	.	.	NW_011550964.1:809857-819810	2716	0	0	0	0	0	0	0	0	0	0	0	0	0	0	0	0	0	0	0	0	0	0	0	0	0	0	0	0	0	0
XR_002163378	105032594	LOC105032594	serine/threonine-protein kinase BSK5, transcript variant X11	misc_RNA	.	.	NW_011550964.1:809857-819810	2711	0	0	0	0	0	0	0	0	0	0	0	0	0	0	0	0	0	0	0	0	0	0	0	0	0	0	0	0	0	0
XR_002163379	105032594	LOC105032594	serine/threonine-protein kinase BSK5, transcript variant X10	misc_RNA	.	.	NW_011550964.1:809857-819810	2740	0	0	0	0	0	0	0	0	0	0	0	0	0	0	0	0	0	0	0	0	0	0	0	0	0	0	0	0	0	0
XR_002163380	105032594	LOC105032594	serine/threonine-protein kinase BSK5, transcript variant X6	misc_RNA	.	.	NW_011550964.1:809857-819810	2713	0	0	0	0	0	0	0	0	0	0	0	0	0	0	0	0	0	0	0	0	0	0	0	0	0	0	0	0	0	0
XR_002163382	105032594	LOC105032594	serine/threonine-protein kinase BSK5, transcript variant X8	misc_RNA	.	.	NW_011550964.1:809857-819810	2689	0	0	0	0	0	0	0	0	0	0	0	0	0	0	0	0	0	0	0	0	0	0	0	0	0	0	0	0	0	0
XR_002163383	105032594	LOC105032594	serine/threonine-protein kinase BSK5, transcript variant X12	misc_RNA	.	.	NW_011550964.1:809857-819810	2604	0	0	0	0	0	0	0	0	0	0	0	0	0	0	0	0	0	0	0	0	0	0	0	0	0	0	0	0	0	0
XR_002163384	105032594	LOC105032594	serine/threonine-protein kinase BSK5, transcript variant X13	misc_RNA	.	.	NW_011550964.1:809857-819810	2693	0	0	0	0	0	0	0	0	0	0	0	0	0	0	0	0	0	0	0	0	0	0	0	0	0	0	0	0	0	0
XR_003798745	105032594	LOC105032594	serine/threonine-protein kinase BSK5, transcript variant X15	misc_RNA	.	.	NW_011550964.1:809857-819810	2306	0	0	0	0	0	0	0	0	0	0	0	0	0	0	0	0	0	0	0	0	0	0	0	0	0	0	0	0	0	0
XR_003798746	105032594	LOC105032594	serine/threonine-protein kinase BSK5, transcript variant X16	misc_RNA	.	.	NW_011550964.1:809857-819810	2267	0	0	0	0	0	0	0	0	0	0	0	0	0	0	0	0	0	0	0	0	0	0	0	0	0	0	0	0	0	0
XR_003798747	105032594	LOC105032594	serine/threonine-protein kinase BSK5, transcript variant X17	misc_RNA	.	.	NW_011550964.1:809857-819810	2198	0	0	0	0	0	0	0	0	0	0	0	0	0	0	0	0	0	0	0	0	0	0	0	0	0	0	0	0	0	0
XM_029261059	105032594	LOC105032594	serine/threonine-protein kinase BSK5, transcript variant X3	mRNA	XP_029116892.1	.	NW_011550964.1:809934-819810	2349	0	0	0	0	0	0	0	0	0	0	0	0	0	0	0	0	0	0	0	0	0	0	0	0	0	0	0	0	0	0
XR_003798742	105032594	LOC105032594	serine/threonine-protein kinase BSK5, transcript variant X1	misc_RNA	.	.	NW_011550964.1:809934-819810	2944	0	0	0	0	0	0	0	0	0	0	0	0	0	0	0	0	0	0	0	0	0	0	0	0	0	0	0	0	0	0
XR_003798743	105032594	LOC105032594	serine/threonine-protein kinase BSK5, transcript variant X2	misc_RNA	.	.	NW_011550964.1:809934-819810	2457	0	0	0	0	0	0	0	0	0	0	0	0	0	0	0	0	0	0	0	0	0	0	0	0	0	0	0	0	0	0
XR_003798744	105032594	LOC105032594	serine/threonine-protein kinase BSK5, transcript variant X14	misc_RNA	.	.	NW_011550964.1:815854-819810	2647	0	0	0	0	0	0	0	0	0	0	0	0	0	0	0	0	0	0	0	0	0	0	0	0	0	0	0	0	0	0
XR_003798748	105032594	LOC105032594	serine/threonine-protein kinase BSK5, transcript variant X18	misc_RNA	.	.	NW_011550964.1:817222-819810	1796	0	0	0	0	0	0	0	0	0	0	0	0	0	0	0	0	0	0	0	0	0	0	0	0	0	0	0	0	0	0
gene-LOC105032595	105032595	LOC105032595	.	Gene	.	.	chr1:62119331-62134111	3055	0	0	0	0	0	0	0	0	0	0	0	0	0	0	0	0	0	0	0	0	0	0	0	0	0	0	0	0	0	0
XM_010907076	105032596	LOC105032596	mitochondrial import inner membrane translocase subunit TIM10, transcript variant X1	mRNA	XP_010905378.1	.	NW_011550964.1:799755-810291	860	0	0	0	0	0	0	0	0	0	0	0	0	0	0	0	0	0	0	0	0	0	0	0	0	0	0	0	0	0	0
XM_010907077	105032596	LOC105032596	mitochondrial import inner membrane translocase subunit TIM10, transcript variant X2	mRNA	XP_010905379.1	.	NW_011550964.1:799785-810291	917	0	0	0	0	0	0	0	0	0	0	0	0	0	0	0	0	0	0	0	0	0	0	0	0	0	0	0	0	0	0
XM_010907078	105032596	LOC105032596	mitochondrial import inner membrane translocase subunit TIM10, transcript variant X3	mRNA	XP_010905380.1	.	NW_011550964.1:799785-810291	900	0	0	0	0	0	0	0	0	0	0	0	0	0	0	0	0	0	0	0	0	0	0	0	0	0	0	0	0	0	0
XM_010907079	105032597	LOC105032597	7-deoxyloganetic acid glucosyltransferase	mRNA	XP_010905381.2	.	NW_011550964.1:842378-844304	1831	0	0	0	0	0	0	0	0	0	0	0	0	0	0	0	0	0	0	0	0	0	0	0	0	0	0	0	0	0	0
XM_029261061	105032598	LOC105032598	copper transporter 6, transcript variant X2	mRNA	XP_029116894.1	.	NW_011550964.1:853842-854565	724	0	0	0	0	0	0	0	0	0	0	0	0	0	0	0	0	0	0	0	0	0	0	0	0	0	0	0	0	0	0
XM_010907080	105032598	LOC105032598	copper transporter 6, transcript variant X1	mRNA	XP_010905382.1	.	NW_011550964.1:853842-854864	919	0	0	0	0	0	0	0	0	0	0	0	0	0	0	0	0	0	0	0	0	0	0	0	0	0	0	0	0	0	0
XM_010907081	105032600	LOC105032600	uncharacterized LOC105032600	mRNA	XP_010905383.1	.	NW_011550964.1:861552-863928	1707	0	0	0	0	0	0	0	0	0	0	0	0	0	0	0	0	0	0	0	0	0	0	0	0	0	0	0	0	0	0
XM_010907082	105032601	LOC105032601	protein GUCD1, transcript variant X1	mRNA	XP_010905384.1	.	NW_011550964.1:881070-889767	1400	0	0	0	0	0	0	0	0	0	0	0	0	0	0	0	0	0	0	0	0	0	0	0	0	0	0	0	0	0	0
XM_010907083	105032601	LOC105032601	protein GUCD1, transcript variant X2	mRNA	XP_010905385.1	.	NW_011550964.1:881070-889768	1589	0	0	0	0	0	0	0	0	0	0	0	0	0	0	0	0	0	0	0	0	0	0	0	0	0	0	0	0	0	0
XM_010907086	105032601	LOC105032601	protein GUCD1, transcript variant X5	mRNA	XP_010905388.1	.	NW_011550964.1:881070-889768	1486	0	0	0	0	0	0	0	0	0	0	0	0	0	0	0	0	0	0	0	0	0	0	0	0	0	0	0	0	0	0
XM_019846342	105032601	LOC105032601	protein GUCD1, transcript variant X3	mRNA	XP_019701901.1	.	NW_011550964.1:881070-889768	1381	0	0	0	0	0	0	0	0	0	0	0	0	0	0	0	0	0	0	0	0	0	0	0	0	0	0	0	0	0	0
XM_029261062	105032601	LOC105032601	protein GUCD1, transcript variant X4	mRNA	XP_029116895.1	.	NW_011550964.1:881070-889768	1298	0	0	0	0	0	0	0	0	0	0	0	0	0	0	0	0	0	0	0	0	0	0	0	0	0	0	0	0	0	0
XR_829848	105032601	LOC105032601	protein GUCD1, transcript variant X6	misc_RNA	.	.	NW_011550964.1:881100-889768	1419	0	0	0	0	0	0	0	0	0	0	0	0	0	0	0	0	0	0	0	0	0	0	0	0	0	0	0	0	0	0
XM_019846001	105032602	LOC105032602	protein STRUBBELIG-RECEPTOR FAMILY 3, transcript variant X2	mRNA	XP_019701560.1	.	chr1:62146898-62169669	3117	1	0	19	8	16	7	7	8	87	5	0.007452	0	1.35012	0.456523	0.802071	0.1004	0.092988	0.491013	6.28758	0.078758	0.010304	0	2.53025	0.788383	1.42879	0.123342	0.122214	0.967112	11.8582	0.099173
XM_019846009	105032602	LOC105032602	protein STRUBBELIG-RECEPTOR FAMILY 3, transcript variant X6	mRNA	XP_019701568.1	.	chr1:62146898-62169939	2938	0	0	0	0	0	0	0	0	0	0	0	0	0	0	0	0	0	0	0	0	0	0	0	0	0	0	0	0	0	0
XM_010907095	105032602	LOC105032602	protein STRUBBELIG-RECEPTOR FAMILY 3, transcript variant X3	mRNA	XP_010905397.1	.	chr1:62146898-62169940	2951	34	22	50	29	122	156	81	26	0	101	0.581417	0.375949	3.69491	1.96531	6.62585	2.65381	1.23435	1.80859	0	1.68463	0.803893	0.526195	6.92458	3.39395	11.8031	3.26021	1.6223	3.56224	0	2.12132
XM_010907115	105032602	LOC105032602	protein STRUBBELIG-RECEPTOR FAMILY 3, transcript variant X7	mRNA	XP_010905417.1	.	chr1:62146898-62169940	2939	0	0	0	0	0	0	0	0	0	0	0	0	0	0	0	0	0	0	0	0	0	0	0	0	0	0	0	0	0	0
XM_010907153	105032602	LOC105032602	protein STRUBBELIG-RECEPTOR FAMILY 3, transcript variant X11	mRNA	XP_010905455.1	.	chr1:62146898-62169940	2921	0	0	0	0	0	0	0	0	0	0	0	0	0	0	0	0	0	0	0	0	0	0	0	0	0	0	0	0	0	0
XM_010907109	105032602	LOC105032602	protein STRUBBELIG-RECEPTOR FAMILY 3, transcript variant X5	mRNA	XP_010905411.1	.	chr1:62146898-62169941	2943	0	0	0	0	0	0	0	0	0	0	0	0	0	0	0	0	0	0	0	0	0	0	0	0	0	0	0	0	0	0
XM_010907124	105032602	LOC105032602	protein STRUBBELIG-RECEPTOR FAMILY 3, transcript variant X8	mRNA	XP_010905426.1	.	chr1:62146898-62169942	2938	0	0	0	0	0	0	0	0	0	0	0	0	0	0	0	0	0	0	0	0	0	0	0	0	0	0	0	0	0	0
XM_010907132	105032602	LOC105032602	protein STRUBBELIG-RECEPTOR FAMILY 3, transcript variant X9	mRNA	XP_010905434.1	.	chr1:62146898-62169942	2935	0	0	0	0	0	0	0	0	0	0	0	0	0	0	0	0	0	0	0	0	0	0	0	0	0	0	0	0	0	0
XM_010907137	105032602	LOC105032602	protein STRUBBELIG-RECEPTOR FAMILY 3, transcript variant X10	mRNA	XP_010905439.1	.	chr1:62146898-62169942	2926	12	4	25	13	13	30	51	6	21	51	0.199193	0.061304	1.87212	0.849638	0.700919	0.516034	0.773012	0.429511	1.59248	0.860667	0.275413	0.085803	3.50852	1.46727	1.2486	0.633947	1.01597	0.845975	3.00336	1.08377
XM_010907088	105032602	LOC105032602	protein STRUBBELIG-RECEPTOR FAMILY 3, transcript variant X1	mRNA	XP_010905390.1	.	chr1:62146898-62169943	2957	0	0	0	0	0	0	0	0	0	0	0	0	0	0	0	0	0	0	0	0	0	0	0	0	0	0	0	0	0	0
XM_010907103	105032602	LOC105032602	protein STRUBBELIG-RECEPTOR FAMILY 3, transcript variant X4	mRNA	XP_010905405.1	.	chr1:62146898-62169943	2954	0	0	0	0	0	0	0	0	0	0	0	0	0	0	0	0	0	0	0	0	0	0	0	0	0	0	0	0	0	0
XM_010907087	105032603	LOC105032603	universal stress protein PHOS32	mRNA	XP_010905389.1	.	NW_011550964.1:896766-908156	1360	0	0	0	0	0	0	0	0	0	0	0	0	0	0	0	0	0	0	0	0	0	0	0	0	0	0	0	0	0	0
gene-LOC105032604	105032604	LOC105032604	.	Gene	.	.	NW_011550964.1:908574-912051	1578	0	0	0	0	0	0	0	0	0	0	0	0	0	0	0	0	0	0	0	0	0	0	0	0	0	0	0	0	0	0
XM_029261063	105032606	LOC105032606	uncharacterized LOC105032606, transcript variant X3	mRNA	XP_029116896.1	.	NW_011550964.1:914993-917549	1925	0	0	0	0	0	0	0	0	0	0	0	0	0	0	0	0	0	0	0	0	0	0	0	0	0	0	0	0	0	0
XM_019846357	105032606	LOC105032606	uncharacterized LOC105032606, transcript variant X4	mRNA	XP_019701916.1	.	NW_011550964.1:914993-917822	965	0	0	0	0	0	0	0	0	0	0	0	0	0	0	0	0	0	0	0	0	0	0	0	0	0	0	0	0	0	0
XR_003798749	105032606	LOC105032606	uncharacterized LOC105032606, transcript variant X1	misc_RNA	.	.	NW_011550964.1:914994-917818	2099	0	0	0	0	0	0	0	0	0	0	0	0	0	0	0	0	0	0	0	0	0	0	0	0	0	0	0	0	0	0
XM_010907089	105032606	LOC105032606	uncharacterized LOC105032606, transcript variant X2	mRNA	XP_010905391.1	.	NW_011550964.1:914994-918366	1063	0	0	0	0	0	0	0	0	0	0	0	0	0	0	0	0	0	0	0	0	0	0	0	0	0	0	0	0	0	0
XR_829849	105032607	LOC105032607	uncharacterized LOC105032607	ncRNA	.	.	NW_011550964.1:953833-954697	761	0	0	0	0	0	0	0	0	0	0	0	0	0	0	0	0	0	0	0	0	0	0	0	0	0	0	0	0	0	0
XM_010907091	105032608	LOC105032608	26S proteasome non-ATPase regulatory subunit 14 homolog, transcript variant X1	mRNA	XP_010905393.1	.	NW_011550964.1:957479-963880	1194	0	0	0	0	0	0	0	0	0	0	0	0	0	0	0	0	0	0	0	0	0	0	0	0	0	0	0	0	0	0
XM_010907092	105032608	LOC105032608	26S proteasome non-ATPase regulatory subunit 14 homolog, transcript variant X2	mRNA	XP_010905394.2	.	NW_011550964.1:957479-963880	1235	0	0	0	0	0	0	0	0	0	0	0	0	0	0	0	0	0	0	0	0	0	0	0	0	0	0	0	0	0	0
XM_010907093	105032609	LOC105032609	elongin-C	mRNA	XP_010905395.1	.	NW_011550964.1:964771-968996	736	0	0	0	0	0	0	0	0	0	0	0	0	0	0	0	0	0	0	0	0	0	0	0	0	0	0	0	0	0	0
XM_010907094	105032610	LOC105032610	ras-related protein Rab2BV	mRNA	XP_010905396.1	.	NW_011550964.1:986026-991591	1145	0	0	0	0	0	0	0	0	0	0	0	0	0	0	0	0	0	0	0	0	0	0	0	0	0	0	0	0	0	0
XM_010907096	105032611	LOC105032611	protein NRT1/ PTR FAMILY 5.6	mRNA	XP_010905398.2	.	NW_011550964.1:1007753-1013068	2117	0	0	0	0	0	0	0	0	0	0	0	0	0	0	0	0	0	0	0	0	0	0	0	0	0	0	0	0	0	0
XM_010907097	105032612	LOC105032612	aldehyde oxidase GLOX	mRNA	XP_010905399.2	.	NW_011550964.1:1013365-1015976	2611	0	0	0	0	0	0	0	0	0	0	0	0	0	0	0	0	0	0	0	0	0	0	0	0	0	0	0	0	0	0
XM_010907098	105032613	LOC105032613	BEL1-like homeodomain protein 9	mRNA	XP_010905400.1	.	NW_011550964.1:1050394-1057258	3221	0	0	0	0	0	0	0	0	0	0	0	0	0	0	0	0	0	0	0	0	0	0	0	0	0	0	0	0	0	0
XM_010907099	105032614	LOC105032614	mitochondrial substrate carrier family protein B, transcript variant X3	mRNA	XP_010905401.1	.	NW_011550964.1:1078730-1086710	1576	0	0	0	0	0	0	0	0	0	0	0	0	0	0	0	0	0	0	0	0	0	0	0	0	0	0	0	0	0	0
XM_010907100	105032614	LOC105032614	mitochondrial substrate carrier family protein B, transcript variant X4	mRNA	XP_010905402.1	.	NW_011550964.1:1078730-1086710	1647	0	0	0	0	0	0	0	0	0	0	0	0	0	0	0	0	0	0	0	0	0	0	0	0	0	0	0	0	0	0
XR_829850	105032614	LOC105032614	mitochondrial substrate carrier family protein B, transcript variant X2	misc_RNA	.	.	NW_011550964.1:1078730-1087674	2214	0	0	0	0	0	0	0	0	0	0	0	0	0	0	0	0	0	0	0	0	0	0	0	0	0	0	0	0	0	0
XR_829851	105032614	LOC105032614	mitochondrial substrate carrier family protein B, transcript variant X1	misc_RNA	.	.	NW_011550964.1:1078730-1087674	2226	0	0	0	0	0	0	0	0	0	0	0	0	0	0	0	0	0	0	0	0	0	0	0	0	0	0	0	0	0	0
XM_019846350	105032615	LOC105032615	serine/threonine-protein phosphatase PP1, transcript variant X3	mRNA	XP_019701909.1	.	NW_011550964.1:1093117-1104966	1673	0	0	0	0	0	0	0	0	0	0	0	0	0	0	0	0	0	0	0	0	0	0	0	0	0	0	0	0	0	0
XM_010907105	105032615	LOC105032615	serine/threonine-protein phosphatase PP1, transcript variant X1	mRNA	XP_010905407.1	.	NW_011550964.1:1093133-1104943	1670	0	0	0	0	0	0	0	0	0	0	0	0	0	0	0	0	0	0	0	0	0	0	0	0	0	0	0	0	0	0
XM_019846349	105032615	LOC105032615	serine/threonine-protein phosphatase PP1, transcript variant X2	mRNA	XP_019701908.1	.	NW_011550964.1:1093133-1104943	1659	0	0	0	0	0	0	0	0	0	0	0	0	0	0	0	0	0	0	0	0	0	0	0	0	0	0	0	0	0	0
XR_002163372	105032616	LOC105032616	uncharacterized LOC105032616, transcript variant X3	misc_RNA	.	.	NW_011550964.1:1107525-1108958	791	0	0	0	0	0	0	0	0	0	0	0	0	0	0	0	0	0	0	0	0	0	0	0	0	0	0	0	0	0	0
XM_019846351	105032616	LOC105032616	uncharacterized LOC105032616, transcript variant X1	mRNA	XP_019701910.1	.	NW_011550964.1:1107531-1114665	765	0	0	0	0	0	0	0	0	0	0	0	0	0	0	0	0	0	0	0	0	0	0	0	0	0	0	0	0	0	0
XM_019846352	105032616	LOC105032616	uncharacterized LOC105032616, transcript variant X2	mRNA	XP_019701911.1	.	NW_011550964.1:1107534-1114665	845	0	0	0	0	0	0	0	0	0	0	0	0	0	0	0	0	0	0	0	0	0	0	0	0	0	0	0	0	0	0
XR_002163373	105032616	LOC105032616	uncharacterized LOC105032616, transcript variant X4	misc_RNA	.	.	NW_011550964.1:1107534-1114665	695	0	0	0	0	0	0	0	0	0	0	0	0	0	0	0	0	0	0	0	0	0	0	0	0	0	0	0	0	0	0
XM_010907141	105032618	LOC105032618	polyamine oxidase 1	mRNA	XP_010905443.1	.	chr1:4968059-4970319	2261	16	62	258	338	364	24	9	489	499	60	0.360171	1.41297	25.2869	29.9106	25.934	0.521418	0.159514	45.3021	50.159	1.31019	0.497988	1.97766	47.3899	51.6535	46.1983	0.640561	0.209649	89.2282	94.5982	1.64981
XM_019846347	105032619	LOC105032619	uncharacterized LOC105032619	mRNA	XP_019701906.1	.	NW_011550964.1:774338-779837	890	0	0	0	0	0	0	0	0	0	0	0	0	0	0	0	0	0	0	0	0	0	0	0	0	0	0	0	0	0	0
gene-LOC105032620	105032620	LOC105032620	.	Gene	.	.	NW_011550964.1:780159-792341	1150	0	0	0	0	0	0	0	0	0	0	0	0	0	0	0	0	0	0	0	0	0	0	0	0	0	0	0	0	0	0
XM_019846361	105032621	LOC105032621	sulfofructose kinase	mRNA	XP_019701920.2	.	NW_011550965.1:8865-16738	1719	0	0	0	0	0	0	0	0	0	0	0	0	0	0	0	0	0	0	0	0	0	0	0	0	0	0	0	0	0	0
XR_829852	105032622	LOC105032622	uncharacterized LOC105032622	ncRNA	.	.	NW_011550965.1:17281-26085	838	0	0	0	0	0	0	0	0	0	0	0	0	0	0	0	0	0	0	0	0	0	0	0	0	0	0	0	0	0	0
XM_010907110	105032623	LOC105032623	uncharacterized LOC105032623	mRNA	XP_010905412.1	.	NW_011550965.1:74714-75444	607	0	0	0	0	0	0	0	0	0	0	0	0	0	0	0	0	0	0	0	0	0	0	0	0	0	0	0	0	0	0
XM_010907111	105032624	LOC105032624	uncharacterized LOC105032624, transcript variant X1	mRNA	XP_010905413.1	.	NW_011550965.1:80833-85403	794	0	0	0	0	0	0	0	0	0	0	0	0	0	0	0	0	0	0	0	0	0	0	0	0	0	0	0	0	0	0
XM_010907112	105032624	LOC105032624	uncharacterized LOC105032624, transcript variant X2	mRNA	XP_010905414.1	.	NW_011550965.1:80833-85403	868	0	0	0	0	0	0	0	0	0	0	0	0	0	0	0	0	0	0	0	0	0	0	0	0	0	0	0	0	0	0
XM_029261068	105032625	LOC105032625	activating molecule in BECN1-regulated autophagy protein 1, transcript variant X3	mRNA	XP_029116901.1	.	NW_011550965.1:91865-98716	818	0	0	0	0	0	0	0	0	0	0	0	0	0	0	0	0	0	0	0	0	0	0	0	0	0	0	0	0	0	0
XM_010907113	105032625	LOC105032625	activating molecule in BECN1-regulated autophagy protein 1, transcript variant X1	mRNA	XP_010905415.2	.	NW_011550965.1:92051-98716	863	0	0	0	0	0	0	0	0	0	0	0	0	0	0	0	0	0	0	0	0	0	0	0	0	0	0	0	0	0	0
XM_029261067	105032625	LOC105032625	activating molecule in BECN1-regulated autophagy protein 1, transcript variant X2	mRNA	XP_029116900.1	.	NW_011550965.1:92051-98727	1347	0	0	0	0	0	0	0	0	0	0	0	0	0	0	0	0	0	0	0	0	0	0	0	0	0	0	0	0	0	0
XM_010907114	105032626	LOC105032626	uncharacterized LOC105032626, transcript variant X1	mRNA	XP_010905416.1	.	NW_011550965.1:116463-133419	1154	0	0	0	0	0	0	0	0	0	0	0	0	0	0	0	0	0	0	0	0	0	0	0	0	0	0	0	0	0	0
XM_010907116	105032626	LOC105032626	uncharacterized LOC105032626, transcript variant X2	mRNA	XP_010905418.1	.	NW_011550965.1:116463-133419	1080	0	0	0	0	0	0	0	0	0	0	0	0	0	0	0	0	0	0	0	0	0	0	0	0	0	0	0	0	0	0
XM_019846374	105032626	LOC105032626	uncharacterized LOC105032626, transcript variant X4	mRNA	XP_019701933.1	.	NW_011550965.1:116463-133419	1043	0	0	0	0	0	0	0	0	0	0	0	0	0	0	0	0	0	0	0	0	0	0	0	0	0	0	0	0	0	0
XM_029261070	105032626	LOC105032626	uncharacterized LOC105032626, transcript variant X5	mRNA	XP_029116903.1	.	NW_011550965.1:116463-133419	1100	0	0	0	0	0	0	0	0	0	0	0	0	0	0	0	0	0	0	0	0	0	0	0	0	0	0	0	0	0	0
XM_029261071	105032626	LOC105032626	uncharacterized LOC105032626, transcript variant X6	mRNA	XP_029116904.1	.	NW_011550965.1:116463-133419	989	0	0	0	0	0	0	0	0	0	0	0	0	0	0	0	0	0	0	0	0	0	0	0	0	0	0	0	0	0	0
XM_029261069	105032626	LOC105032626	uncharacterized LOC105032626, transcript variant X3	mRNA	XP_029116902.1	.	NW_011550965.1:116463-133423	1058	0	0	0	0	0	0	0	0	0	0	0	0	0	0	0	0	0	0	0	0	0	0	0	0	0	0	0	0	0	0
XM_029261072	105032626	LOC105032626	uncharacterized LOC105032626, transcript variant X7	mRNA	XP_029116905.1	.	NW_011550965.1:116555-133419	971	0	0	0	0	0	0	0	0	0	0	0	0	0	0	0	0	0	0	0	0	0	0	0	0	0	0	0	0	0	0
XR_003798755	105032626	LOC105032626	uncharacterized LOC105032626, transcript variant X8	misc_RNA	.	.	NW_011550965.1:116555-133419	1237	0	0	0	0	0	0	0	0	0	0	0	0	0	0	0	0	0	0	0	0	0	0	0	0	0	0	0	0	0	0
XR_829853	105032626	LOC105032626	uncharacterized LOC105032626, transcript variant X9	misc_RNA	.	.	NW_011550965.1:116635-133419	1130	0	0	0	0	0	0	0	0	0	0	0	0	0	0	0	0	0	0	0	0	0	0	0	0	0	0	0	0	0	0
XR_829854	105032627	LOC105032627	uncharacterized LOC105032627	ncRNA	.	.	NW_011550965.1:197542-204610	1082	0	0	0	0	0	0	0	0	0	0	0	0	0	0	0	0	0	0	0	0	0	0	0	0	0	0	0	0	0	0
XM_010907118	105032628	LOC105032628	homeobox-leucine zipper protein HOX32, transcript variant X1	mRNA	XP_010905420.1	.	NW_011550965.1:211825-219646	3248	0	0	0	0	0	0	0	0	0	0	0	0	0	0	0	0	0	0	0	0	0	0	0	0	0	0	0	0	0	0
XM_010907119	105032628	LOC105032628	homeobox-leucine zipper protein HOX32, transcript variant X2	mRNA	XP_010905421.1	.	NW_011550965.1:211825-219646	3245	0	0	0	0	0	0	0	0	0	0	0	0	0	0	0	0	0	0	0	0	0	0	0	0	0	0	0	0	0	0
XM_010907120	105032629	LOC105032629	nuclear transcription factor Y subunit A-7, transcript variant X9	mRNA	XP_010905422.1	.	NW_011550965.1:256431-295235	1530	0	0	0	0	0	0	0	0	0	0	0	0	0	0	0	0	0	0	0	0	0	0	0	0	0	0	0	0	0	0
XM_019846363	105032629	LOC105032629	nuclear transcription factor Y subunit A-7, transcript variant X1	mRNA	XP_019701922.1	.	NW_011550965.1:256637-295235	1464	0	0	0	0	0	0	0	0	0	0	0	0	0	0	0	0	0	0	0	0	0	0	0	0	0	0	0	0	0	0
XM_019846364	105032629	LOC105032629	nuclear transcription factor Y subunit A-7, transcript variant X3	mRNA	XP_019701923.1	.	NW_011550965.1:256637-295235	1579	0	0	0	0	0	0	0	0	0	0	0	0	0	0	0	0	0	0	0	0	0	0	0	0	0	0	0	0	0	0
XM_019846365	105032629	LOC105032629	nuclear transcription factor Y subunit A-7, transcript variant X2	mRNA	XP_019701924.1	.	NW_011550965.1:256637-295235	1633	0	0	0	0	0	0	0	0	0	0	0	0	0	0	0	0	0	0	0	0	0	0	0	0	0	0	0	0	0	0
XM_019846366	105032629	LOC105032629	nuclear transcription factor Y subunit A-7, transcript variant X6	mRNA	XP_019701925.1	.	NW_011550965.1:256637-295235	1439	0	0	0	0	0	0	0	0	0	0	0	0	0	0	0	0	0	0	0	0	0	0	0	0	0	0	0	0	0	0
XM_019846367	105032629	LOC105032629	nuclear transcription factor Y subunit A-7, transcript variant X5	mRNA	XP_019701926.1	.	NW_011550965.1:256637-295235	1493	0	0	0	0	0	0	0	0	0	0	0	0	0	0	0	0	0	0	0	0	0	0	0	0	0	0	0	0	0	0
XM_019846368	105032629	LOC105032629	nuclear transcription factor Y subunit A-7, transcript variant X4	mRNA	XP_019701927.1	.	NW_011550965.1:256637-295235	1467	0	0	0	0	0	0	0	0	0	0	0	0	0	0	0	0	0	0	0	0	0	0	0	0	0	0	0	0	0	0
XM_019846370	105032629	LOC105032629	nuclear transcription factor Y subunit A-7, transcript variant X8	mRNA	XP_019701929.1	.	NW_011550965.1:256637-295235	1398	0	0	0	0	0	0	0	0	0	0	0	0	0	0	0	0	0	0	0	0	0	0	0	0	0	0	0	0	0	0
XM_029261073	105032629	LOC105032629	nuclear transcription factor Y subunit A-7, transcript variant X7	mRNA	XP_029116906.1	.	NW_011550965.1:256637-295235	1567	0	0	0	0	0	0	0	0	0	0	0	0	0	0	0	0	0	0	0	0	0	0	0	0	0	0	0	0	0	0
XM_010907122	105032629	LOC105032629	nuclear transcription factor Y subunit A-7, transcript variant X10	mRNA	XP_010905424.1	.	NW_011550965.1:256637-295236	1144	0	0	0	0	0	0	0	0	0	0	0	0	0	0	0	0	0	0	0	0	0	0	0	0	0	0	0	0	0	0
XM_010907123	105032629	LOC105032629	nuclear transcription factor Y subunit A-7, transcript variant X12	mRNA	XP_010905425.1	.	NW_011550965.1:256637-295236	1284	0	0	0	0	0	0	0	0	0	0	0	0	0	0	0	0	0	0	0	0	0	0	0	0	0	0	0	0	0	0
XM_029261074	105032629	LOC105032629	nuclear transcription factor Y subunit A-7, transcript variant X11	mRNA	XP_029116907.1	.	NW_011550965.1:256637-295236	1453	0	0	0	0	0	0	0	0	0	0	0	0	0	0	0	0	0	0	0	0	0	0	0	0	0	0	0	0	0	0
XM_029261075	105032629	LOC105032629	nuclear transcription factor Y subunit A-7, transcript variant X13	mRNA	XP_029116908.1	.	NW_011550965.1:256637-295236	1313	0	0	0	0	0	0	0	0	0	0	0	0	0	0	0	0	0	0	0	0	0	0	0	0	0	0	0	0	0	0
XM_010907125	105032630	LOC105032630	U3 snoRNP-associated protein-like YAOH	mRNA	XP_010905427.1	.	NW_011550965.1:296912-309091	2048	0	0	0	0	0	0	0	0	0	0	0	0	0	0	0	0	0	0	0	0	0	0	0	0	0	0	0	0	0	0
XM_029261076	105032631	LOC105032631	187-kDa microtubule-associated protein AIR9, transcript variant X3	mRNA	XP_029116909.1	.	NW_011550965.1:444024-479514	4737	0	0	0	0	0	0	0	0	0	0	0	0	0	0	0	0	0	0	0	0	0	0	0	0	0	0	0	0	0	0
XM_010907126	105032631	LOC105032631	187-kDa microtubule-associated protein AIR9, transcript variant X1	mRNA	XP_010905428.1	.	NW_011550965.1:444024-491933	5841	0	0	0	0	0	0	0	0	0	0	0	0	0	0	0	0	0	0	0	0	0	0	0	0	0	0	0	0	0	0
XM_010907127	105032631	LOC105032631	187-kDa microtubule-associated protein AIR9, transcript variant X2	mRNA	XP_010905429.1	.	NW_011550965.1:444024-491933	5895	0	0	0	0	0	0	0	0	0	0	0	0	0	0	0	0	0	0	0	0	0	0	0	0	0	0	0	0	0	0
XM_010907128	105032632	LOC105032632	cationic amino acid transporter 1-like	mRNA	XP_010905430.1	.	NW_011550965.1:594026-596592	1975	0	0	0	0	0	0	0	0	0	0	0	0	0	0	0	0	0	0	0	0	0	0	0	0	0	0	0	0	0	0
XM_010907129	105032633	LOC105032633	BTB/POZ domain-containing protein At1g30440	mRNA	XP_010905431.1	.	NW_011550965.1:646801-653925	3403	0	0	0	0	0	0	0	0	0	0	0	0	0	0	0	0	0	0	0	0	0	0	0	0	0	0	0	0	0	0
XM_029261077	105032634	LOC105032634	single myb histone 6, transcript variant X1	mRNA	XP_029116910.1	.	NW_011550965.1:757243-778599	2026	0	0	0	0	0	0	0	0	0	0	0	0	0	0	0	0	0	0	0	0	0	0	0	0	0	0	0	0	0	0
XM_029261078	105032634	LOC105032634	single myb histone 6, transcript variant X2	mRNA	XP_029116911.1	.	NW_011550965.1:757243-778602	1945	0	0	0	0	0	0	0	0	0	0	0	0	0	0	0	0	0	0	0	0	0	0	0	0	0	0	0	0	0	0
XM_010907130	105032634	LOC105032634	single myb histone 6, transcript variant X3	mRNA	XP_010905432.1	.	NW_011550965.1:757243-778771	1482	0	0	0	0	0	0	0	0	0	0	0	0	0	0	0	0	0	0	0	0	0	0	0	0	0	0	0	0	0	0
XM_029261065	105032636	LOC105032636	glucan endo-1,3-beta-glucosidase 13, transcript variant X1	mRNA	XP_029116898.1	.	NW_011550965.1:1031648-1036036	748	0	0	0	0	0	0	0	0	0	0	0	0	0	0	0	0	0	0	0	0	0	0	0	0	0	0	0	0	0	0
XM_029261066	105032636	LOC105032636	glucan endo-1,3-beta-glucosidase 13, transcript variant X2	mRNA	XP_029116899.1	.	NW_011550965.1:1032755-1036036	502	0	0	0	0	0	0	0	0	0	0	0	0	0	0	0	0	0	0	0	0	0	0	0	0	0	0	0	0	0	0
XM_010907134	105032638	LOC105032638	pentatricopeptide repeat-containing protein At3g02650, mitochondrial-like	mRNA	XP_010905436.1	.	NW_011550965.1:1077179-1079425	2247	0	0	0	0	0	0	0	0	0	0	0	0	0	0	0	0	0	0	0	0	0	0	0	0	0	0	0	0	0	0
XM_010907135	105032639	LOC105032639	subtilisin-like protease SBT1.5	mRNA	XP_010905437.2	.	NW_011550965.1:6743-7318	576	0	0	0	0	0	0	0	0	0	0	0	0	0	0	0	0	0	0	0	0	0	0	0	0	0	0	0	0	0	0
gene-LOC105032640	105032640	LOC105032640	.	Gene	.	.	NW_011550965.1:76349-78927	1240	0	0	0	0	0	0	0	0	0	0	0	0	0	0	0	0	0	0	0	0	0	0	0	0	0	0	0	0	0	0
XM_010907136	105032641	LOC105032641	nitrate regulatory gene2 protein, transcript variant X2	mRNA	XP_010905438.1	.	NW_011550966.1:167252-178516	3176	0	0	0	0	0	0	0	0	0	0	0	0	0	0	0	0	0	0	0	0	0	0	0	0	0	0	0	0	0	0
XM_010907138	105032641	LOC105032641	nitrate regulatory gene2 protein, transcript variant X3	mRNA	XP_010905440.1	.	NW_011550966.1:167252-178516	3123	0	0	0	0	0	0	0	0	0	0	0	0	0	0	0	0	0	0	0	0	0	0	0	0	0	0	0	0	0	0
XM_019846378	105032641	LOC105032641	nitrate regulatory gene2 protein, transcript variant X1	mRNA	XP_019701937.1	.	NW_011550966.1:167252-178516	3290	0	0	0	0	0	0	0	0	0	0	0	0	0	0	0	0	0	0	0	0	0	0	0	0	0	0	0	0	0	0
XM_010907139	105032643	LOC105032643	telomerase reverse transcriptase, transcript variant X1	mRNA	XP_010905441.1	.	NW_011550966.1:786046-896834	5251	0	0	0	0	0	0	0	0	0	0	0	0	0	0	0	0	0	0	0	0	0	0	0	0	0	0	0	0	0	0
XM_019846376	105032643	LOC105032643	telomerase reverse transcriptase, transcript variant X3	mRNA	XP_019701935.1	.	NW_011550966.1:786046-896834	4993	0	0	0	0	0	0	0	0	0	0	0	0	0	0	0	0	0	0	0	0	0	0	0	0	0	0	0	0	0	0
XM_019846377	105032643	LOC105032643	telomerase reverse transcriptase, transcript variant X4	mRNA	XP_019701936.1	.	NW_011550966.1:786046-896834	5246	0	0	0	0	0	0	0	0	0	0	0	0	0	0	0	0	0	0	0	0	0	0	0	0	0	0	0	0	0	0
XM_010907140	105032643	LOC105032643	telomerase reverse transcriptase, transcript variant X2	mRNA	XP_010905442.1	.	NW_011550966.1:786046-897135	5223	0	0	0	0	0	0	0	0	0	0	0	0	0	0	0	0	0	0	0	0	0	0	0	0	0	0	0	0	0	0
XM_010907142	105032644	LOC105032644	uncharacterized LOC105032644	mRNA	XP_010905444.2	.	NW_011550967.1:517432-522477	982	0	0	0	0	0	0	0	0	0	0	0	0	0	0	0	0	0	0	0	0	0	0	0	0	0	0	0	0	0	0
XM_010907143	105032645	LOC105032645	protein WVD2-like 1, transcript variant X2	mRNA	XP_010905445.1	.	NW_011550967.1:649317-663993	1617	0	0	0	0	0	0	0	0	0	0	0	0	0	0	0	0	0	0	0	0	0	0	0	0	0	0	0	0	0	0
XM_010907144	105032645	LOC105032645	protein WVD2-like 1, transcript variant X1	mRNA	XP_010905446.1	.	NW_011550967.1:649369-663991	1559	0	0	0	0	0	0	0	0	0	0	0	0	0	0	0	0	0	0	0	0	0	0	0	0	0	0	0	0	0	0
XM_010907145	105032646	LOC105032646	uncharacterized protein At2g34160	mRNA	XP_010905447.1	.	NW_011550967.1:759800-762235	879	0	0	0	0	0	0	0	0	0	0	0	0	0	0	0	0	0	0	0	0	0	0	0	0	0	0	0	0	0	0
XM_010907147	105032647	LOC105032647	proteasome subunit beta type-5	mRNA	XP_010905449.1	.	NW_011550967.1:771551-800396	1210	0	0	0	0	0	0	0	0	0	0	0	0	0	0	0	0	0	0	0	0	0	0	0	0	0	0	0	0	0	0
XM_010907148	105032648	LOC105032648	flowering locus K homology domain	mRNA	XP_010905450.1	.	NW_011550967.1:880063-905945	1912	0	0	0	0	0	0	0	0	0	0	0	0	0	0	0	0	0	0	0	0	0	0	0	0	0	0	0	0	0	0
XM_019846381	105032650	LOC105032650	myosin-binding protein 1, transcript variant X1	mRNA	XP_019701940.1	.	NW_011550967.1:375377-389123	3089	0	0	0	0	0	0	0	0	0	0	0	0	0	0	0	0	0	0	0	0	0	0	0	0	0	0	0	0	0	0
XM_029261079	105032650	LOC105032650	myosin-binding protein 1, transcript variant X2	mRNA	XP_029116912.1	.	NW_011550967.1:375377-389123	3128	0	0	0	0	0	0	0	0	0	0	0	0	0	0	0	0	0	0	0	0	0	0	0	0	0	0	0	0	0	0
XM_029261080	105032650	LOC105032650	myosin-binding protein 1, transcript variant X3	mRNA	XP_029116913.1	.	NW_011550967.1:375377-389123	3052	0	0	0	0	0	0	0	0	0	0	0	0	0	0	0	0	0	0	0	0	0	0	0	0	0	0	0	0	0	0
gene-LOC105032651	105032651	LOC105032651	.	Gene	.	.	NW_011550967.1:404792-405609	458	0	0	0	0	0	0	0	0	0	0	0	0	0	0	0	0	0	0	0	0	0	0	0	0	0	0	0	0	0	0
XM_010907151	105032652	LOC105032652	uncharacterized LOC105032652, transcript variant X2	mRNA	XP_010905453.1	.	NW_011550967.1:593977-597088	2838	0	0	0	0	0	0	0	0	0	0	0	0	0	0	0	0	0	0	0	0	0	0	0	0	0	0	0	0	0	0
XM_019846382	105032652	LOC105032652	uncharacterized LOC105032652, transcript variant X1	mRNA	XP_019701941.1	.	NW_011550967.1:593977-597088	2854	0	0	0	0	0	0	0	0	0	0	0	0	0	0	0	0	0	0	0	0	0	0	0	0	0	0	0	0	0	0
XM_010907152	105032653	LOC105032653	potassium channel KOR1	mRNA	XP_010905454.2	.	NW_011550968.1:783678-800394	2529	0	0	0	0	0	0	0	0	0	0	0	0	0	0	0	0	0	0	0	0	0	0	0	0	0	0	0	0	0	0
XM_029261081	105032654	LOC105032654	vacuolar fusion protein CCZ1 homolog	mRNA	XP_029116914.1	.	NW_011550968.1:728334-789888	2195	0	0	0	0	0	0	0	0	0	0	0	0	0	0	0	0	0	0	0	0	0	0	0	0	0	0	0	0	0	0
XR_003798768	105032655	LOC105032655	tRNA threonylcarbamoyladenosine dehydratase, transcript variant X11	misc_RNA	.	.	NW_011550968.1:1030075-1075072	1640	0	0	0	0	0	0	0	0	0	0	0	0	0	0	0	0	0	0	0	0	0	0	0	0	0	0	0	0	0	0
XM_010907156	105032655	LOC105032655	tRNA threonylcarbamoyladenosine dehydratase, transcript variant X12	mRNA	XP_010905458.1	.	NW_011550968.1:1030075-1080150	2081	0	0	0	0	0	0	0	0	0	0	0	0	0	0	0	0	0	0	0	0	0	0	0	0	0	0	0	0	0	0
XM_029261082	105032655	LOC105032655	tRNA threonylcarbamoyladenosine dehydratase, transcript variant X1	mRNA	XP_029116915.1	.	NW_011550968.1:1030075-1080150	2288	0	0	0	0	0	0	0	0	0	0	0	0	0	0	0	0	0	0	0	0	0	0	0	0	0	0	0	0	0	0
XM_029261083	105032655	LOC105032655	tRNA threonylcarbamoyladenosine dehydratase, transcript variant X3	mRNA	XP_029116916.1	.	NW_011550968.1:1030075-1080150	2210	0	0	0	0	0	0	0	0	0	0	0	0	0	0	0	0	0	0	0	0	0	0	0	0	0	0	0	0	0	0
XM_029261084	105032655	LOC105032655	tRNA threonylcarbamoyladenosine dehydratase, transcript variant X4	mRNA	XP_029116917.1	.	NW_011550968.1:1030075-1080150	2159	0	0	0	0	0	0	0	0	0	0	0	0	0	0	0	0	0	0	0	0	0	0	0	0	0	0	0	0	0	0
XM_029261086	105032655	LOC105032655	tRNA threonylcarbamoyladenosine dehydratase, transcript variant X6	mRNA	XP_029116919.1	.	NW_011550968.1:1030075-1080150	2153	0	0	0	0	0	0	0	0	0	0	0	0	0	0	0	0	0	0	0	0	0	0	0	0	0	0	0	0	0	0
XM_029261087	105032655	LOC105032655	tRNA threonylcarbamoyladenosine dehydratase, transcript variant X7	mRNA	XP_029116920.1	.	NW_011550968.1:1030075-1080150	2471	0	0	0	0	0	0	0	0	0	0	0	0	0	0	0	0	0	0	0	0	0	0	0	0	0	0	0	0	0	0
XM_029261088	105032655	LOC105032655	tRNA threonylcarbamoyladenosine dehydratase, transcript variant X8	mRNA	XP_029116921.1	.	NW_011550968.1:1030075-1080150	2461	0	0	0	0	0	0	0	0	0	0	0	0	0	0	0	0	0	0	0	0	0	0	0	0	0	0	0	0	0	0
XM_029261089	105032655	LOC105032655	tRNA threonylcarbamoyladenosine dehydratase, transcript variant X9	mRNA	XP_029116922.1	.	NW_011550968.1:1030075-1080150	2200	0	0	0	0	0	0	0	0	0	0	0	0	0	0	0	0	0	0	0	0	0	0	0	0	0	0	0	0	0	0
XR_003798767	105032655	LOC105032655	tRNA threonylcarbamoyladenosine dehydratase, transcript variant X10	misc_RNA	.	.	NW_011550968.1:1030075-1080150	2155	0	0	0	0	0	0	0	0	0	0	0	0	0	0	0	0	0	0	0	0	0	0	0	0	0	0	0	0	0	0
XR_003798765	105032655	LOC105032655	tRNA threonylcarbamoyladenosine dehydratase, transcript variant X2	misc_RNA	.	.	NW_011550968.1:1030075-1080160	2164	0	0	0	0	0	0	0	0	0	0	0	0	0	0	0	0	0	0	0	0	0	0	0	0	0	0	0	0	0	0
XR_003798766	105032655	LOC105032655	tRNA threonylcarbamoyladenosine dehydratase, transcript variant X5	misc_RNA	.	.	NW_011550968.1:1030075-1080160	2035	0	0	0	0	0	0	0	0	0	0	0	0	0	0	0	0	0	0	0	0	0	0	0	0	0	0	0	0	0	0
XM_010907157	105032656	LOC105032656	vacuolar iron transporter 1.1	mRNA	XP_010905459.1	.	NW_011550968.1:1150883-1155074	973	0	0	0	0	0	0	0	0	0	0	0	0	0	0	0	0	0	0	0	0	0	0	0	0	0	0	0	0	0	0
gene-LOC105032657	105032657	LOC105032657	.	Gene	.	.	NW_011550968.1:336273-337396	1021	0	0	0	0	0	0	0	0	0	0	0	0	0	0	0	0	0	0	0	0	0	0	0	0	0	0	0	0	0	0
XM_010907159	105032658	LOC105032658	uncharacterized LOC105032658	mRNA	XP_010905461.2	.	chr1:62180885-62182088	1204	11	16	24	8	7	17	11	5	9	8	0.455678	0.673678	4.36987	1.18577	0.915069	0.694102	0.407173	0.711084	1.63329	0.300715	0.630041	0.942911	8.18952	2.04774	1.63008	0.852702	0.535147	1.40057	3.08032	0.378665
gene-LOC105032659	105032659	LOC105032659	.	Gene	.	.	NW_011550968.1:876856-879657	603	0	0	0	0	0	0	0	0	0	0	0	0	0	0	0	0	0	0	0	0	0	0	0	0	0	0	0	0	0	0
XM_029261090	105032660	LOC105032660	serine/arginine-rich splicing factor SR34A, transcript variant X1	mRNA	XP_029116923.1	.	NW_011550969.1:136163-177507	2813	0	0	0	0	0	0	0	0	0	0	0	0	0	0	0	0	0	0	0	0	0	0	0	0	0	0	0	0	0	0
XM_010907160	105032660	LOC105032660	serine/arginine-rich splicing factor SR34A, transcript variant X8	mRNA	XP_010905462.1	.	NW_011550969.1:136163-178921	1481	0	0	0	0	0	0	0	0	0	0	0	0	0	0	0	0	0	0	0	0	0	0	0	0	0	0	0	0	0	0
XM_029261096	105032660	LOC105032660	serine/arginine-rich splicing factor SR34A, transcript variant X7	mRNA	XP_029116929.1	.	NW_011550969.1:136163-180175	1466	0	0	0	0	0	0	0	0	0	0	0	0	0	0	0	0	0	0	0	0	0	0	0	0	0	0	0	0	0	0
XM_029261097	105032660	LOC105032660	serine/arginine-rich splicing factor SR34A, transcript variant X9	mRNA	XP_029116930.1	.	NW_011550969.1:136163-180175	1473	0	0	0	0	0	0	0	0	0	0	0	0	0	0	0	0	0	0	0	0	0	0	0	0	0	0	0	0	0	0
XM_029261099	105032660	LOC105032660	serine/arginine-rich splicing factor SR34A, transcript variant X11	mRNA	XP_029116932.1	.	NW_011550969.1:136164-175838	1150	0	0	0	0	0	0	0	0	0	0	0	0	0	0	0	0	0	0	0	0	0	0	0	0	0	0	0	0	0	0
XM_029261098	105032660	LOC105032660	serine/arginine-rich splicing factor SR34A, transcript variant X10	mRNA	XP_029116931.1	.	NW_011550969.1:136164-178885	1451	0	0	0	0	0	0	0	0	0	0	0	0	0	0	0	0	0	0	0	0	0	0	0	0	0	0	0	0	0	0
XM_029261100	105032660	LOC105032660	serine/arginine-rich splicing factor SR34A, transcript variant X12	mRNA	XP_029116933.1	.	NW_011550969.1:136164-179908	1205	0	0	0	0	0	0	0	0	0	0	0	0	0	0	0	0	0	0	0	0	0	0	0	0	0	0	0	0	0	0
XM_029261092	105032660	LOC105032660	serine/arginine-rich splicing factor SR34A, transcript variant X3	mRNA	XP_029116925.1	.	NW_011550969.1:136206-177509	2832	0	0	0	0	0	0	0	0	0	0	0	0	0	0	0	0	0	0	0	0	0	0	0	0	0	0	0	0	0	0
XM_029261093	105032660	LOC105032660	serine/arginine-rich splicing factor SR34A, transcript variant X4	mRNA	XP_029116926.1	.	NW_011550969.1:136206-177509	2895	0	0	0	0	0	0	0	0	0	0	0	0	0	0	0	0	0	0	0	0	0	0	0	0	0	0	0	0	0	0
XM_029261094	105032660	LOC105032660	serine/arginine-rich splicing factor SR34A, transcript variant X5	mRNA	XP_029116927.1	.	NW_011550969.1:136206-177509	2841	0	0	0	0	0	0	0	0	0	0	0	0	0	0	0	0	0	0	0	0	0	0	0	0	0	0	0	0	0	0
XM_029261095	105032660	LOC105032660	serine/arginine-rich splicing factor SR34A, transcript variant X6	mRNA	XP_029116928.1	.	NW_011550969.1:136206-177509	2730	0	0	0	0	0	0	0	0	0	0	0	0	0	0	0	0	0	0	0	0	0	0	0	0	0	0	0	0	0	0
XM_029261091	105032660	LOC105032660	serine/arginine-rich splicing factor SR34A, transcript variant X2	mRNA	XP_029116924.1	.	NW_011550969.1:136207-177508	2824	0	0	0	0	0	0	0	0	0	0	0	0	0	0	0	0	0	0	0	0	0	0	0	0	0	0	0	0	0	0
XM_010907167	105032661	LOC105032661	uncharacterized LOC105032661, transcript variant X1	mRNA	XP_010905469.1	.	NW_011550969.1:551529-607402	691	0	0	0	0	0	0	0	0	0	0	0	0	0	0	0	0	0	0	0	0	0	0	0	0	0	0	0	0	0	0
XM_010907168	105032661	LOC105032661	uncharacterized LOC105032661, transcript variant X3	mRNA	XP_010905470.1	.	NW_011550969.1:551529-607417	700	0	0	0	0	0	0	0	0	0	0	0	0	0	0	0	0	0	0	0	0	0	0	0	0	0	0	0	0	0	0
XM_010907169	105032661	LOC105032661	uncharacterized LOC105032661, transcript variant X2	mRNA	XP_010905471.1	.	NW_011550969.1:551529-607417	744	0	0	0	0	0	0	0	0	0	0	0	0	0	0	0	0	0	0	0	0	0	0	0	0	0	0	0	0	0	0
XM_010907173	105032662	LOC105032662	uncharacterized LOC105032662	mRNA	XP_010905475.1	.	chr1:62183805-62185172	1368	0	0	0	0	0	2	0	0	0	1	0	0	0	0	0	0.059796	0	0	0	0.036167	0	0	0	0	0	0.073459	0	0	0	0.045542
XM_010907170	105032663	LOC105032663	polyol transporter 5	mRNA	XP_010905472.2	.	NW_011550969.1:648464-650412	1855	0	0	0	0	0	0	0	0	0	0	0	0	0	0	0	0	0	0	0	0	0	0	0	0	0	0	0	0	0	0
XM_010907171	105032664	LOC105032664	putative polyol transporter 1	mRNA	XP_010905473.2	.	NW_011550969.1:1020992-1023936	2403	0	0	0	0	0	0	0	0	0	0	0	0	0	0	0	0	0	0	0	0	0	0	0	0	0	0	0	0	0	0
XM_010907172	105032665	LOC105032665	L-type lectin-domain containing receptor kinase IX.1	mRNA	XP_010905474.1	.	NW_011550970.1:65533-68557	2275	0	0	0	0	0	0	0	0	0	0	0	0	0	0	0	0	0	0	0	0	0	0	0	0	0	0	0	0	0	0
XR_829861	105032666	LOC105032666	uncharacterized LOC105032666	ncRNA	.	.	NW_011550970.1:642581-644385	1308	0	0	0	0	0	0	0	0	0	0	0	0	0	0	0	0	0	0	0	0	0	0	0	0	0	0	0	0	0	0
XM_019846393	105032667	LOC105032667	SPX and EXS domain-containing protein 1, transcript variant X4	mRNA	XP_019701952.1	.	NW_011550970.1:648156-668862	1745	0	0	0	0	0	0	0	0	0	0	0	0	0	0	0	0	0	0	0	0	0	0	0	0	0	0	0	0	0	0
XM_010907174	105032667	LOC105032667	SPX and EXS domain-containing protein 1, transcript variant X1	mRNA	XP_010905476.1	.	NW_011550970.1:648156-671520	2134	0	0	0	0	0	0	0	0	0	0	0	0	0	0	0	0	0	0	0	0	0	0	0	0	0	0	0	0	0	0
XM_010907176	105032667	LOC105032667	SPX and EXS domain-containing protein 1, transcript variant X2	mRNA	XP_010905478.1	.	NW_011550970.1:648156-671520	2162	0	0	0	0	0	0	0	0	0	0	0	0	0	0	0	0	0	0	0	0	0	0	0	0	0	0	0	0	0	0
XM_010907178	105032667	LOC105032667	SPX and EXS domain-containing protein 1, transcript variant X3	mRNA	XP_010905480.1	.	NW_011550970.1:648156-671520	1999	0	0	0	0	0	0	0	0	0	0	0	0	0	0	0	0	0	0	0	0	0	0	0	0	0	0	0	0	0	0
XM_019846391	105032668	LOC105032668	L-type lectin-domain containing receptor kinase IX.1	mRNA	XP_019701950.1	.	NW_011550970.1:703649-708428	2346	0	0	0	0	0	0	0	0	0	0	0	0	0	0	0	0	0	0	0	0	0	0	0	0	0	0	0	0	0	0
XM_019846387	105032669	LOC105032669	L-type lectin-domain containing receptor kinase IX.1	mRNA	XP_019701946.1	.	NW_011550970.1:15143-20307	2052	0	0	0	0	0	0	0	0	0	0	0	0	0	0	0	0	0	0	0	0	0	0	0	0	0	0	0	0	0	0
XM_010907183	105032670	LOC105032670	uncharacterized LOC105032670	mRNA	XP_010905485.1	.	chr1:62192140-62197448	1246	0	0	0	7	9	0	0	0	7	0	0	0	0	1.08516	1.08129	0	0	0	1.26162	0	0	0	0	1.87399	1.92618	0	0	0	2.37937	0
gene-LOC105032671	105032671	LOC105032671	.	Gene	.	.	NW_011550970.1:130876-190618	1433	0	0	0	0	0	0	0	0	0	0	0	0	0	0	0	0	0	0	0	0	0	0	0	0	0	0	0	0	0	0
XM_019846388	105032672	LOC105032672	probable glycosyltransferase At5g20260	mRNA	XP_019701947.2	.	NW_011550970.1:197786-200600	1386	0	0	0	0	0	0	0	0	0	0	0	0	0	0	0	0	0	0	0	0	0	0	0	0	0	0	0	0	0	0
XM_029261101	105032673	LOC105032673	L-type lectin-domain containing receptor kinase IX.1-like	mRNA	XP_029116934.1	.	NW_011550970.1:255938-258829	2151	0	0	0	0	0	0	0	0	0	0	0	0	0	0	0	0	0	0	0	0	0	0	0	0	0	0	0	0	0	0
XM_019846392	105032674	LOC105032674	L-type lectin-domain containing receptor kinase IX.1-like	mRNA	XP_019701951.1	.	NW_011550970.1:302351-305690	2151	0	0	0	0	0	0	0	0	0	0	0	0	0	0	0	0	0	0	0	0	0	0	0	0	0	0	0	0	0	0
XM_010907185	105032675	LOC105032675	L-type lectin-domain containing receptor kinase IX.1	mRNA	XP_010905487.1	.	NW_011550970.1:360408-363432	2260	0	0	0	0	0	0	0	0	0	0	0	0	0	0	0	0	0	0	0	0	0	0	0	0	0	0	0	0	0	0
XM_029261103	105032676	LOC105032676	lectin alpha chain-like	mRNA	XP_029116936.1	.	NW_011550970.1:567493-568930	1438	0	0	0	0	0	0	0	0	0	0	0	0	0	0	0	0	0	0	0	0	0	0	0	0	0	0	0	0	0	0
XM_010907187	105032677	LOC105032677	seed lectin beta chain	mRNA	XP_010905489.1	.	NW_011550970.1:639898-640956	1059	0	0	0	0	0	0	0	0	0	0	0	0	0	0	0	0	0	0	0	0	0	0	0	0	0	0	0	0	0	0
XM_029261102	105032678	LOC105032678	L-type lectin-domain containing receptor kinase IX.1	mRNA	XP_029116935.1	.	NW_011550970.1:773104-775446	1369	0	0	0	0	0	0	0	0	0	0	0	0	0	0	0	0	0	0	0	0	0	0	0	0	0	0	0	0	0	0
XM_019846399	105032679	LOC105032679	secoisolariciresinol dehydrogenase-like	mRNA	XP_019701958.1	.	NW_011550971.1:11683-25328	834	0	0	0	0	0	0	0	0	0	0	0	0	0	0	0	0	0	0	0	0	0	0	0	0	0	0	0	0	0	0
gene-LOC105032680	105032680	LOC105032680	.	Gene	.	.	NW_011550971.1:80116-83931	1058	0	0	0	0	0	0	0	0	0	0	0	0	0	0	0	0	0	0	0	0	0	0	0	0	0	0	0	0	0	0
XM_010907191	105032681	LOC105032681	helicase-like transcription factor CHR28, transcript variant X1	mRNA	XP_010905493.1	.	chr1:62227335-62255526	4940	301	258	458	878	773	391	343	802	1112	380	3.10367	2.71287	20.538	35.5573	25.2012	3.98133	3.12672	33.9809	51.143	3.80102	4.29127	3.79706	38.4901	61.405	44.8928	4.89106	4.10946	66.9296	96.4539	4.7863
XM_010907207	105032681	LOC105032681	helicase-like transcription factor CHR28, transcript variant X3	mRNA	XP_010905509.1	.	chr1:62227344-62255407	4704	0	0	0	0	0	0	0	0	0	0	0	0	0	0	0	0	0	0	0	0	0	0	0	0	0	0	0	0	0	0
XM_029261034	105032681	LOC105032681	helicase-like transcription factor CHR28, transcript variant X2	mRNA	XP_029116867.1	.	chr1:62227344-62255407	4800	0	0	373	0	0	0	0	1613	1319	0	0	0	17.2163	0	0	0	0	70.3885	62.4326	0	0	0	32.2649	0	0	0	0	138.639	117.746	0
XR_829862	105032682	LOC105032682	uncharacterized LOC105032682	ncRNA	.	.	NW_011550971.1:87579-102846	345	0	0	0	0	0	0	0	0	0	0	0	0	0	0	0	0	0	0	0	0	0	0	0	0	0	0	0	0	0	0
XM_010907190	105032683	LOC105032683	MAG2-interacting protein 2, transcript variant X1	mRNA	XP_010905492.1	.	NW_011550971.1:438982-461481	8049	0	0	0	0	0	0	0	0	0	0	0	0	0	0	0	0	0	0	0	0	0	0	0	0	0	0	0	0	0	0
XM_019846404	105032683	LOC105032683	MAG2-interacting protein 2, transcript variant X2	mRNA	XP_019701963.1	.	NW_011550971.1:438982-461481	8048	0	0	0	0	0	0	0	0	0	0	0	0	0	0	0	0	0	0	0	0	0	0	0	0	0	0	0	0	0	0
XM_010907192	105032684	LOC105032684	calmodulin-binding transcription activator 4, transcript variant X1	mRNA	XP_010905494.1	.	NW_011550971.1:575511-601758	3769	0	0	0	0	0	0	0	0	0	0	0	0	0	0	0	0	0	0	0	0	0	0	0	0	0	0	0	0	0	0
XM_019846403	105032684	LOC105032684	calmodulin-binding transcription activator 4, transcript variant X3	mRNA	XP_019701962.1	.	NW_011550971.1:575511-601758	3746	0	0	0	0	0	0	0	0	0	0	0	0	0	0	0	0	0	0	0	0	0	0	0	0	0	0	0	0	0	0
XM_029261105	105032684	LOC105032684	calmodulin-binding transcription activator 4, transcript variant X2	mRNA	XP_029116938.1	.	NW_011550971.1:575511-601758	3797	0	0	0	0	0	0	0	0	0	0	0	0	0	0	0	0	0	0	0	0	0	0	0	0	0	0	0	0	0	0
XM_010907193	105032685	LOC105032685	uncharacterized LOC105032685	mRNA	XP_010905495.1	.	NW_011550971.1:629389-631223	897	0	0	0	0	0	0	0	0	0	0	0	0	0	0	0	0	0	0	0	0	0	0	0	0	0	0	0	0	0	0
XM_010907194	105032686	LOC105032686	non-specific phospholipase C6	mRNA	XP_010905496.1	.	NW_011550971.1:650649-655254	2092	0	0	0	0	0	0	0	0	0	0	0	0	0	0	0	0	0	0	0	0	0	0	0	0	0	0	0	0	0	0
XM_010907195	105032687	LOC105032687	nuclear transport factor 2B	mRNA	XP_010905497.1	.	NW_011550971.1:657725-661967	782	0	0	0	0	0	0	0	0	0	0	0	0	0	0	0	0	0	0	0	0	0	0	0	0	0	0	0	0	0	0
XM_010907196	105032688	LOC105032688	mediator of RNA polymerase II transcription subunit 30, transcript variant X1	mRNA	XP_010905498.1	.	NW_011550971.1:668677-674185	810	0	0	0	0	0	0	0	0	0	0	0	0	0	0	0	0	0	0	0	0	0	0	0	0	0	0	0	0	0	0
XM_019846395	105032688	LOC105032688	mediator of RNA polymerase II transcription subunit 30, transcript variant X2	mRNA	XP_019701954.1	.	NW_011550971.1:668710-674185	793	0	0	0	0	0	0	0	0	0	0	0	0	0	0	0	0	0	0	0	0	0	0	0	0	0	0	0	0	0	0
XM_010907201	105032689	LOC105032689	thylakoid lumenal 17.9 kDa protein, chloroplastic	mRNA	XP_010905503.1	.	NW_011550971.1:699304-701315	867	0	0	0	0	0	0	0	0	0	0	0	0	0	0	0	0	0	0	0	0	0	0	0	0	0	0	0	0	0	0
XM_010907202	105032690	LOC105032690	uncharacterized LOC105032690, transcript variant X1	mRNA	XP_010905504.1	.	NW_011550971.1:708638-713245	3398	0	0	0	0	0	0	0	0	0	0	0	0	0	0	0	0	0	0	0	0	0	0	0	0	0	0	0	0	0	0
XM_019846405	105032690	LOC105032690	uncharacterized LOC105032690, transcript variant X2	mRNA	XP_019701964.1	.	NW_011550971.1:708638-713245	3444	0	0	0	0	0	0	0	0	0	0	0	0	0	0	0	0	0	0	0	0	0	0	0	0	0	0	0	0	0	0
XM_010907204	105032691	LOC105032691	U6 snRNA-associated Sm-like protein LSm6	mRNA	XP_010905506.1	.	NW_011550971.1:717638-724130	673	0	0	0	0	0	0	0	0	0	0	0	0	0	0	0	0	0	0	0	0	0	0	0	0	0	0	0	0	0	0
XM_010907205	105032692	LOC105032692	zinc finger protein 511	mRNA	XP_010905507.1	.	NW_011550971.1:725462-739495	1584	0	0	0	0	0	0	0	0	0	0	0	0	0	0	0	0	0	0	0	0	0	0	0	0	0	0	0	0	0	0
XM_029261104	105032693	LOC105032693	uncharacterized LOC105032693	mRNA	XP_029116937.1	.	NW_011550971.1:756833-758715	1635	0	0	0	0	0	0	0	0	0	0	0	0	0	0	0	0	0	0	0	0	0	0	0	0	0	0	0	0	0	0
XM_010907208	105032694	LOC105032694	probable serine/threonine-protein kinase PBL21, transcript variant X1	mRNA	XP_010905510.1	.	NW_011550971.1:832256-835998	1952	0	0	0	0	0	0	0	0	0	0	0	0	0	0	0	0	0	0	0	0	0	0	0	0	0	0	0	0	0	0
XM_029261106	105032694	LOC105032694	probable serine/threonine-protein kinase PBL21, transcript variant X2	mRNA	XP_029116939.1	.	NW_011550971.1:832647-835998	1641	0	0	0	0	0	0	0	0	0	0	0	0	0	0	0	0	0	0	0	0	0	0	0	0	0	0	0	0	0	0
gene-LOC105032695	105032695	LOC105032695	.	Gene	.	.	NW_011550971.1:847492-876827	1731	0	0	0	0	0	0	0	0	0	0	0	0	0	0	0	0	0	0	0	0	0	0	0	0	0	0	0	0	0	0
XM_010907209	105032696	LOC105032696	heavy metal-associated isoprenylated plant protein 7	mRNA	XP_010905511.1	.	NW_011550971.1:905393-907853	1577	0	0	0	0	0	0	0	0	0	0	0	0	0	0	0	0	0	0	0	0	0	0	0	0	0	0	0	0	0	0
XM_010907210	105032697	LOC105032697	proline-rich receptor-like protein kinase PERK2	mRNA	XP_010905512.1	.	NW_011550971.1:49419-50228	810	0	0	0	0	0	0	0	0	0	0	0	0	0	0	0	0	0	0	0	0	0	0	0	0	0	0	0	0	0	0
XR_829867	105032698	LOC105032698	uncharacterized LOC105032698	ncRNA	.	.	chr1:4979228-4985208	727	0	0	0	0	0	0	0	0	0	0	0	0	0	0	0	0	0	0	0	0	0	0	0	0	0	0	0	0	0	0
XM_010907211	105032699	LOC105032699	basic proline-rich protein	mRNA	XP_010905513.1	.	NW_011550971.1:937902-938693	792	0	0	0	0	0	0	0	0	0	0	0	0	0	0	0	0	0	0	0	0	0	0	0	0	0	0	0	0	0	0
XM_010907216	105032700	LOC105032700	indole-3-acetic acid-amido synthetase GH3.10	mRNA	XP_010905518.1	.	chr1:62262119-62266635	2287	10	6	0	0	0	3	0	0	0	7	0.21524	0.124509	0	0	0	0.044089	0	0	0	0.139258	0.2976	0.174268	0	0	0	0.054163	0	0	0	0.175355
XM_010907212	105032701	LOC105032701	cytochrome P450 86B1-like	mRNA	XP_010905514.2	.	NW_011550972.1:64811-67841	1812	0	0	0	0	0	0	0	0	0	0	0	0	0	0	0	0	0	0	0	0	0	0	0	0	0	0	0	0	0	0
XM_010907213	105032702	LOC105032702	cytochrome P450 86B1	mRNA	XP_010905515.1	.	NW_011550972.1:645384-649592	1878	0	0	0	0	0	0	0	0	0	0	0	0	0	0	0	0	0	0	0	0	0	0	0	0	0	0	0	0	0	0
XM_029261110	105032703	LOC105032703	50S ribosomal protein L24, transcript variant X4	mRNA	XP_029116943.1	.	NW_011550972.1:684695-698430	768	0	0	0	0	0	0	0	0	0	0	0	0	0	0	0	0	0	0	0	0	0	0	0	0	0	0	0	0	0	0
XM_029261112	105032703	LOC105032703	50S ribosomal protein L24, transcript variant X7	mRNA	XP_029116945.1	.	NW_011550972.1:684695-698438	571	0	0	0	0	0	0	0	0	0	0	0	0	0	0	0	0	0	0	0	0	0	0	0	0	0	0	0	0	0	0
XM_029261108	105032703	LOC105032703	50S ribosomal protein L24, transcript variant X2	mRNA	XP_029116941.1	.	NW_011550972.1:684695-699094	960	0	0	0	0	0	0	0	0	0	0	0	0	0	0	0	0	0	0	0	0	0	0	0	0	0	0	0	0	0	0
XM_029261109	105032703	LOC105032703	50S ribosomal protein L24, transcript variant X3	mRNA	XP_029116942.1	.	NW_011550972.1:684695-699097	782	0	0	0	0	0	0	0	0	0	0	0	0	0	0	0	0	0	0	0	0	0	0	0	0	0	0	0	0	0	0
XM_010907217	105032703	LOC105032703	50S ribosomal protein L24, transcript variant X6	mRNA	XP_010905519.1	.	NW_011550972.1:684695-699104	1084	0	0	0	0	0	0	0	0	0	0	0	0	0	0	0	0	0	0	0	0	0	0	0	0	0	0	0	0	0	0
XM_029261107	105032703	LOC105032703	50S ribosomal protein L24, transcript variant X1	mRNA	XP_029116940.1	.	NW_011550972.1:684695-699106	975	0	0	0	0	0	0	0	0	0	0	0	0	0	0	0	0	0	0	0	0	0	0	0	0	0	0	0	0	0	0
XM_029261113	105032703	LOC105032703	50S ribosomal protein L24, transcript variant X8	mRNA	XP_029116946.1	.	NW_011550972.1:685451-698438	723	0	0	0	0	0	0	0	0	0	0	0	0	0	0	0	0	0	0	0	0	0	0	0	0	0	0	0	0	0	0
XM_029261111	105032703	LOC105032703	50S ribosomal protein L24, transcript variant X5	mRNA	XP_029116944.1	.	NW_011550972.1:685451-699104	1125	0	0	0	0	0	0	0	0	0	0	0	0	0	0	0	0	0	0	0	0	0	0	0	0	0	0	0	0	0	0
XM_010907221	105032704	LOC105032704	mycothiol acetyltransferase	mRNA	XP_010905523.1	.	NW_011550972.1:711564-718168	718	0	0	0	0	0	0	0	0	0	0	0	0	0	0	0	0	0	0	0	0	0	0	0	0	0	0	0	0	0	0
XM_010907222	105032705	LOC105032705	tetraspanin-19-like	mRNA	XP_010905524.1	.	NW_011550972.1:786845-789647	520	0	0	0	0	0	0	0	0	0	0	0	0	0	0	0	0	0	0	0	0	0	0	0	0	0	0	0	0	0	0
XM_010907223	105032706	LOC105032706	sphingolipid delta(4)-desaturase DES1-like	mRNA	XP_010905525.1	.	NW_011550972.1:797986-801597	1237	0	0	0	0	0	0	0	0	0	0	0	0	0	0	0	0	0	0	0	0	0	0	0	0	0	0	0	0	0	0
XM_029261114	105032707	LOC105032707	E3 ubiquitin-protein ligase AIRP2, transcript variant X2	mRNA	XP_029116947.1	.	NW_011550972.1:807325-822756	1318	0	0	0	0	0	0	0	0	0	0	0	0	0	0	0	0	0	0	0	0	0	0	0	0	0	0	0	0	0	0
XM_010907224	105032707	LOC105032707	E3 ubiquitin-protein ligase AIRP2, transcript variant X1	mRNA	XP_010905526.1	.	NW_011550972.1:807325-822806	1308	0	0	0	0	0	0	0	0	0	0	0	0	0	0	0	0	0	0	0	0	0	0	0	0	0	0	0	0	0	0
XM_010907229	105032708	LOC105032708	peptidyl-prolyl cis-trans isomerase CYP37, chloroplastic, transcript variant X1	mRNA	XP_010905531.1	.	chr1:62275602-62284661	1942	111	70	15	16	7	94	80	0	0	61	2.905	1.85595	1.64551	1.62935	0.500256	2.43274	1.84471	0	0	1.53283	4.01657	2.59768	3.08383	2.81377	0.891145	2.98862	2.4245	0	0	1.93017
XM_019848571	105032708	LOC105032708	peptidyl-prolyl cis-trans isomerase CYP37, chloroplastic, transcript variant X2	mRNA	XP_019704130.1	.	chr1:62275602-62284661	1892	0	0	0	0	0	0	0	0	0	0	0	0	0	0	0	0	0	0	0	0	0	0	0	0	0	0	0	0	0	0
XM_010907226	105032709	LOC105032709	expansin-B16	mRNA	XP_010905528.1	.	NW_011550972.1:923182-927505	1349	0	0	0	0	0	0	0	0	0	0	0	0	0	0	0	0	0	0	0	0	0	0	0	0	0	0	0	0	0	0
XR_003798773	105032710	LOC105032710	general transcription factor 3C polypeptide 6, transcript variant X5	misc_RNA	.	.	NW_011550972.1:963104-972973	609	0	0	0	0	0	0	0	0	0	0	0	0	0	0	0	0	0	0	0	0	0	0	0	0	0	0	0	0	0	0
XM_010907228	105032710	LOC105032710	general transcription factor 3C polypeptide 6, transcript variant X2	mRNA	XP_010905530.1	.	NW_011550972.1:963107-973042	1035	0	0	0	0	0	0	0	0	0	0	0	0	0	0	0	0	0	0	0	0	0	0	0	0	0	0	0	0	0	0
XR_829864	105032710	LOC105032710	general transcription factor 3C polypeptide 6, transcript variant X3	misc_RNA	.	.	NW_011550972.1:963107-973042	837	0	0	0	0	0	0	0	0	0	0	0	0	0	0	0	0	0	0	0	0	0	0	0	0	0	0	0	0	0	0
XR_829866	105032710	LOC105032710	general transcription factor 3C polypeptide 6, transcript variant X4	misc_RNA	.	.	NW_011550972.1:963107-973042	623	0	0	0	0	0	0	0	0	0	0	0	0	0	0	0	0	0	0	0	0	0	0	0	0	0	0	0	0	0	0
XM_010907227	105032710	LOC105032710	general transcription factor 3C polypeptide 6, transcript variant X1	mRNA	XP_010905529.1	.	NW_011550972.1:963110-973042	886	0	0	0	0	0	0	0	0	0	0	0	0	0	0	0	0	0	0	0	0	0	0	0	0	0	0	0	0	0	0
XM_010907232	105032711	LOC105032711	ultraviolet-B receptor UVR8, transcript variant X1	mRNA	XP_010905534.1	.	NW_011550972.1:979972-1001630	3541	0	0	0	0	0	0	0	0	0	0	0	0	0	0	0	0	0	0	0	0	0	0	0	0	0	0	0	0	0	0
XM_010907233	105032711	LOC105032711	ultraviolet-B receptor UVR8, transcript variant X2	mRNA	XP_010905535.1	.	NW_011550972.1:979972-1001630	3456	0	0	0	0	0	0	0	0	0	0	0	0	0	0	0	0	0	0	0	0	0	0	0	0	0	0	0	0	0	0
XM_019846410	105032711	LOC105032711	ultraviolet-B receptor UVR8, transcript variant X3	mRNA	XP_019701969.1	.	NW_011550972.1:979972-1001630	3640	0	0	0	0	0	0	0	0	0	0	0	0	0	0	0	0	0	0	0	0	0	0	0	0	0	0	0	0	0	0
XM_019846411	105032711	LOC105032711	ultraviolet-B receptor UVR8, transcript variant X4	mRNA	XP_019701970.1	.	NW_011550972.1:979972-1001630	3207	0	0	0	0	0	0	0	0	0	0	0	0	0	0	0	0	0	0	0	0	0	0	0	0	0	0	0	0	0	0
XM_010907234	105032712	LOC105032712	CBS domain-containing protein CBSX5	mRNA	XP_010905536.1	.	NW_011550972.1:1024831-1026604	1447	0	0	0	0	0	0	0	0	0	0	0	0	0	0	0	0	0	0	0	0	0	0	0	0	0	0	0	0	0	0
XM_010907235	105032713	LOC105032713	CBS domain-containing protein CBSX5	mRNA	XP_010905537.1	.	NW_011550972.1:1150039-1151865	1495	0	0	0	0	0	0	0	0	0	0	0	0	0	0	0	0	0	0	0	0	0	0	0	0	0	0	0	0	0	0
XM_010907236	105032714	LOC105032714	uncharacterized LOC105032714	mRNA	XP_010905538.1	.	NW_011550973.1:70780-71296	517	0	0	0	0	0	0	0	0	0	0	0	0	0	0	0	0	0	0	0	0	0	0	0	0	0	0	0	0	0	0
XM_010907295	105032715	LOC105032715	uncharacterized LOC105032715, transcript variant X10	mRNA	XP_010905597.1	.	chr1:62285038-62293877	1092	0	0	0	0	0	0	0	0	0	0	0	0	0	0	0	0	0	0	0	0	0	0	0	0	0	0	0	0	0	0
XM_010907309	105032715	LOC105032715	uncharacterized LOC105032715, transcript variant X11	mRNA	XP_010905611.1	.	chr1:62285038-62293877	956	0	0	0	0	0	0	0	0	0	0	0	0	0	0	0	0	0	0	0	0	0	0	0	0	0	0	0	0	0	0
XR_003798740	105032715	LOC105032715	uncharacterized LOC105032715, transcript variant X9	misc_RNA	.	.	chr1:62285038-62293877	1198	0	0	0	0	0	0	0	0	0	0	0	0	0	0	0	0	0	0	0	0	0	0	0	0	0	0	0	0	0	0
XM_010907319	105032715	LOC105032715	uncharacterized LOC105032715, transcript variant X12	mRNA	XP_010905621.1	.	chr1:62285038-62294387	1122	0	0	0	0	0	0	0	0	0	0	0	0	0	0	0	0	0	0	0	0	0	0	0	0	0	0	0	0	0	0
XM_010907287	105032715	LOC105032715	uncharacterized LOC105032715, transcript variant X7	mRNA	XP_010905589.1	.	chr1:62285039-62293877	1121	0	0	0	0	0	0	0	0	0	0	0	0	0	0	0	0	0	0	0	0	0	0	0	0	0	0	0	0	0	0
XR_003798739	105032715	LOC105032715	uncharacterized LOC105032715, transcript variant X8	misc_RNA	.	.	chr1:62285039-62293877	1538	0	0	7	0	0	0	20	0	8	0	0	0	0.995409	0	0	0	0.560237	0	1.05146	0	0	0	1.86549	0	0	0	0.73632	0	1.98302	0
XM_010907277	105032715	LOC105032715	uncharacterized LOC105032715, transcript variant X6	mRNA	XP_010905579.1	.	chr1:62285048-62294608	1342	0	0	0	0	0	0	0	0	0	0	0	0	0	0	0	0	0	0	0	0	0	0	0	0	0	0	0	0	0	0
XR_003798734	105032715	LOC105032715	uncharacterized LOC105032715, transcript variant X4	misc_RNA	.	.	chr1:62285049-62293877	1196	0	0	0	0	0	0	0	0	0	0	0	0	0	0	0	0	0	0	0	0	0	0	0	0	0	0	0	0	0	0
XM_010907247	105032715	LOC105032715	uncharacterized LOC105032715, transcript variant X3	mRNA	XP_010905549.1	.	chr1:62285050-62293877	1089	0	0	0	0	0	0	0	0	0	0	0	0	0	0	0	0	0	0	0	0	0	0	0	0	0	0	0	0	0	0
XM_010907269	105032715	LOC105032715	uncharacterized LOC105032715, transcript variant X5	mRNA	XP_010905571.1	.	chr1:62285050-62293877	953	0	0	0	0	0	0	0	0	0	0	0	0	0	0	0	0	0	0	0	0	0	0	0	0	0	0	0	0	0	0
XR_003798732	105032715	LOC105032715	uncharacterized LOC105032715, transcript variant X2	misc_RNA	.	.	chr1:62285051-62293877	1535	58	47	0	16	9	29	0	8	0	28	1.90146	1.5832	0	1.99141	0.874929	0.933881	0	0.961826	0	0.872613	2.62905	2.21593	0	3.43903	1.55858	1.14727	0	1.89444	0	1.09881
XM_010907241	105032715	LOC105032715	uncharacterized LOC105032715, transcript variant X1	mRNA	XP_010905543.1	.	chr1:62285053-62293877	1116	0	0	0	0	0	0	0	0	0	0	0	0	0	0	0	0	0	0	0	0	0	0	0	0	0	0	0	0	0	0
XM_029261117	105032716	LOC105032716	general transcription factor 3C polypeptide 6, transcript variant X5	mRNA	XP_029116950.1	.	NW_011550973.1:156532-166817	1222	0	0	0	0	0	0	0	0	0	0	0	0	0	0	0	0	0	0	0	0	0	0	0	0	0	0	0	0	0	0
XM_029261118	105032716	LOC105032716	general transcription factor 3C polypeptide 6, transcript variant X6	mRNA	XP_029116951.1	.	NW_011550973.1:156533-166848	1240	0	0	0	0	0	0	0	0	0	0	0	0	0	0	0	0	0	0	0	0	0	0	0	0	0	0	0	0	0	0
XM_010907242	105032716	LOC105032716	general transcription factor 3C polypeptide 6, transcript variant X7	mRNA	XP_010905544.1	.	NW_011550973.1:156537-166848	1000	0	0	0	0	0	0	0	0	0	0	0	0	0	0	0	0	0	0	0	0	0	0	0	0	0	0	0	0	0	0
XM_029261116	105032716	LOC105032716	general transcription factor 3C polypeptide 6, transcript variant X4	mRNA	XP_029116949.1	.	NW_011550973.1:156539-166817	991	0	0	0	0	0	0	0	0	0	0	0	0	0	0	0	0	0	0	0	0	0	0	0	0	0	0	0	0	0	0
XM_010907239	105032716	LOC105032716	general transcription factor 3C polypeptide 6, transcript variant X1	mRNA	XP_010905541.1	.	NW_011550973.1:156540-166817	1131	0	0	0	0	0	0	0	0	0	0	0	0	0	0	0	0	0	0	0	0	0	0	0	0	0	0	0	0	0	0
XM_010907240	105032716	LOC105032716	general transcription factor 3C polypeptide 6, transcript variant X2	mRNA	XP_010905542.1	.	NW_011550973.1:156540-166817	1125	0	0	0	0	0	0	0	0	0	0	0	0	0	0	0	0	0	0	0	0	0	0	0	0	0	0	0	0	0	0
XM_010907237	105032716	LOC105032716	general transcription factor 3C polypeptide 6, transcript variant X3	mRNA	XP_010905539.1	.	NW_011550973.1:156541-166817	894	0	0	0	0	0	0	0	0	0	0	0	0	0	0	0	0	0	0	0	0	0	0	0	0	0	0	0	0	0	0
XR_003798774	105032717	LOC105032717	general transcription factor 3C polypeptide 6-like, transcript variant X2	misc_RNA	.	.	NW_011550973.1:172594-198138	456	0	0	0	0	0	0	0	0	0	0	0	0	0	0	0	0	0	0	0	0	0	0	0	0	0	0	0	0	0	0
XM_010907243	105032717	LOC105032717	general transcription factor 3C polypeptide 6-like, transcript variant X1	mRNA	XP_010905545.1	.	NW_011550973.1:196937-200617	642	0	0	0	0	0	0	0	0	0	0	0	0	0	0	0	0	0	0	0	0	0	0	0	0	0	0	0	0	0	0
XM_010907244	105032718	LOC105032718	uncharacterized LOC105032718	mRNA	XP_010905546.1	.	NW_011550973.1:309008-309540	533	0	0	0	0	0	0	0	0	0	0	0	0	0	0	0	0	0	0	0	0	0	0	0	0	0	0	0	0	0	0
XM_010907245	105032719	LOC105032719	uncharacterized LOC105032719	mRNA	XP_010905547.1	.	NW_011550973.1:339932-340672	741	0	0	0	0	0	0	0	0	0	0	0	0	0	0	0	0	0	0	0	0	0	0	0	0	0	0	0	0	0	0
gene-LOC105032720	105032720	LOC105032720	.	Gene	.	.	NW_011550973.1:386498-388821	285	0	0	0	0	0	0	0	0	0	0	0	0	0	0	0	0	0	0	0	0	0	0	0	0	0	0	0	0	0	0
XM_010907246	105032721	LOC105032721	uncharacterized LOC105032721	mRNA	XP_010905548.1	.	NW_011550973.1:410769-411459	691	0	0	0	0	0	0	0	0	0	0	0	0	0	0	0	0	0	0	0	0	0	0	0	0	0	0	0	0	0	0
gene-LOC105032722	105032722	LOC105032722	.	Gene	.	.	NW_011550973.1:443074-443361	288	0	0	0	0	0	0	0	0	0	0	0	0	0	0	0	0	0	0	0	0	0	0	0	0	0	0	0	0	0	0
XM_010907248	105032723	LOC105032723	uncharacterized LOC105032723	mRNA	XP_010905550.1	.	NW_011550973.1:709627-710323	697	0	0	0	0	0	0	0	0	0	0	0	0	0	0	0	0	0	0	0	0	0	0	0	0	0	0	0	0	0	0
XM_010907249	105032724	LOC105032724	uncharacterized LOC105032724	mRNA	XP_010905551.1	.	NW_011550973.1:793669-794168	500	0	0	0	0	0	0	0	0	0	0	0	0	0	0	0	0	0	0	0	0	0	0	0	0	0	0	0	0	0	0
XM_010907250	105032725	LOC105032725	uncharacterized LOC105032725, transcript variant X1	mRNA	XP_010905552.1	.	NW_011550973.1:1063445-1068246	710	0	0	0	0	0	0	0	0	0	0	0	0	0	0	0	0	0	0	0	0	0	0	0	0	0	0	0	0	0	0
XM_010907251	105032725	LOC105032725	uncharacterized LOC105032725, transcript variant X2	mRNA	XP_010905553.1	.	NW_011550973.1:1063445-1068260	685	0	0	0	0	0	0	0	0	0	0	0	0	0	0	0	0	0	0	0	0	0	0	0	0	0	0	0	0	0	0
XM_010907255	105032726	LOC105032726	vesicle-associated protein 4-1, transcript variant X1	mRNA	XP_010905557.1	.	NW_011550973.1:1089834-1096403	1492	0	0	0	0	0	0	0	0	0	0	0	0	0	0	0	0	0	0	0	0	0	0	0	0	0	0	0	0	0	0
XM_010907257	105032726	LOC105032726	vesicle-associated protein 4-1, transcript variant X2	mRNA	XP_010905559.1	.	NW_011550973.1:1089834-1096403	1466	0	0	0	0	0	0	0	0	0	0	0	0	0	0	0	0	0	0	0	0	0	0	0	0	0	0	0	0	0	0
XM_010907259	105032728	LOC105032728	uncharacterized LOC105032728	mRNA	XP_010905561.1	.	NW_011550973.1:424934-426054	945	0	0	0	0	0	0	0	0	0	0	0	0	0	0	0	0	0	0	0	0	0	0	0	0	0	0	0	0	0	0
XM_010907260	105032730	LOC105032730	uncharacterized LOC105032730	mRNA	XP_010905562.1	.	NW_011550973.1:811985-816058	555	0	0	0	0	0	0	0	0	0	0	0	0	0	0	0	0	0	0	0	0	0	0	0	0	0	0	0	0	0	0
XM_010907262	105032731	LOC105032731	sugar transport protein MST6	mRNA	XP_010905564.1	.	NW_011550974.1:73804-77960	1888	0	0	0	0	0	0	0	0	0	0	0	0	0	0	0	0	0	0	0	0	0	0	0	0	0	0	0	0	0	0
XM_010907263	105032732	LOC105032732	vacuolar protein 8-like	mRNA	XP_010905565.1	.	NW_011550974.1:132634-134696	2063	0	0	0	0	0	0	0	0	0	0	0	0	0	0	0	0	0	0	0	0	0	0	0	0	0	0	0	0	0	0
XM_010907265	105032733	LOC105032733	protein TRANSPORT INHIBITOR RESPONSE 1, transcript variant X2	mRNA	XP_010905567.1	.	NW_011550974.1:140669-148792	3981	0	0	0	0	0	0	0	0	0	0	0	0	0	0	0	0	0	0	0	0	0	0	0	0	0	0	0	0	0	0
XM_010907266	105032733	LOC105032733	protein TRANSPORT INHIBITOR RESPONSE 1, transcript variant X3	mRNA	XP_010905568.1	.	NW_011550974.1:140669-148792	3949	0	0	0	0	0	0	0	0	0	0	0	0	0	0	0	0	0	0	0	0	0	0	0	0	0	0	0	0	0	0
XR_829868	105032733	LOC105032733	protein TRANSPORT INHIBITOR RESPONSE 1, transcript variant X1	misc_RNA	.	.	NW_011550974.1:140669-148796	4524	0	0	0	0	0	0	0	0	0	0	0	0	0	0	0	0	0	0	0	0	0	0	0	0	0	0	0	0	0	0
XM_010907267	105032734	LOC105032734	external alternative NAD(P)H-ubiquinone oxidoreductase B2, mitochondrial	mRNA	XP_010905569.1	.	NW_011550974.1:217006-227703	2143	0	0	0	0	0	0	0	0	0	0	0	0	0	0	0	0	0	0	0	0	0	0	0	0	0	0	0	0	0	0
XM_010907268	105032735	LOC105032735	F-box protein At1g61340	mRNA	XP_010905570.1	.	NW_011550974.1:244792-246737	1183	0	0	0	0	0	0	0	0	0	0	0	0	0	0	0	0	0	0	0	0	0	0	0	0	0	0	0	0	0	0
XM_029261119	105032736	LOC105032736	myosin-1, transcript variant X2	mRNA	XP_029116952.1	.	NW_011550974.1:261648-280130	3597	0	0	0	0	0	0	0	0	0	0	0	0	0	0	0	0	0	0	0	0	0	0	0	0	0	0	0	0	0	0
XM_010907270	105032736	LOC105032736	myosin-1, transcript variant X1	mRNA	XP_010905572.2	.	NW_011550974.1:261648-302342	4459	0	0	0	0	0	0	0	0	0	0	0	0	0	0	0	0	0	0	0	0	0	0	0	0	0	0	0	0	0	0
XM_010907272	105032737	LOC105032737	uncharacterized LOC105032737, transcript variant X1	mRNA	XP_010905574.1	.	NW_011550974.1:314404-321949	760	0	0	0	0	0	0	0	0	0	0	0	0	0	0	0	0	0	0	0	0	0	0	0	0	0	0	0	0	0	0
XM_029261120	105032737	LOC105032737	uncharacterized LOC105032737, transcript variant X2	mRNA	XP_029116953.1	.	NW_011550974.1:314405-321962	735	0	0	0	0	0	0	0	0	0	0	0	0	0	0	0	0	0	0	0	0	0	0	0	0	0	0	0	0	0	0
XM_010907273	105032738	LOC105032738	sphingosine kinase 2	mRNA	XP_010905575.1	.	NW_011550974.1:333849-340145	1646	0	0	0	0	0	0	0	0	0	0	0	0	0	0	0	0	0	0	0	0	0	0	0	0	0	0	0	0	0	0
XM_010907274	105032739	LOC105032739	B3 domain-containing protein Os07g0563300, transcript variant X1	mRNA	XP_010905576.1	.	NW_011550974.1:368487-394411	3722	0	0	0	0	0	0	0	0	0	0	0	0	0	0	0	0	0	0	0	0	0	0	0	0	0	0	0	0	0	0
XM_019846415	105032739	LOC105032739	B3 domain-containing protein Os07g0563300, transcript variant X2	mRNA	XP_019701974.1	.	NW_011550974.1:368653-394411	3599	0	0	0	0	0	0	0	0	0	0	0	0	0	0	0	0	0	0	0	0	0	0	0	0	0	0	0	0	0	0
XM_010907275	105032740	LOC105032740	vacuolar protein sorting-associated protein 28 homolog 1	mRNA	XP_010905577.1	.	NW_011550974.1:394902-403451	2123	0	0	0	0	0	0	0	0	0	0	0	0	0	0	0	0	0	0	0	0	0	0	0	0	0	0	0	0	0	0
XM_010907276	105032741	LOC105032741	uncharacterized LOC105032741	mRNA	XP_010905578.1	.	NW_011550974.1:416403-418074	1435	0	0	0	0	0	0	0	0	0	0	0	0	0	0	0	0	0	0	0	0	0	0	0	0	0	0	0	0	0	0
XM_019846424	105032742	LOC105032742	WASH complex subunit 2, transcript variant X1	mRNA	XP_019701983.1	.	NW_011550974.1:428849-447525	2264	0	0	0	0	0	0	0	0	0	0	0	0	0	0	0	0	0	0	0	0	0	0	0	0	0	0	0	0	0	0
XM_019846426	105032742	LOC105032742	WASH complex subunit 2, transcript variant X2	mRNA	XP_019701985.1	.	NW_011550974.1:431043-447525	1841	0	0	0	0	0	0	0	0	0	0	0	0	0	0	0	0	0	0	0	0	0	0	0	0	0	0	0	0	0	0
XM_029261121	105032742	LOC105032742	WASH complex subunit 2, transcript variant X3	mRNA	XP_029116954.1	.	NW_011550974.1:431043-447525	1857	0	0	0	0	0	0	0	0	0	0	0	0	0	0	0	0	0	0	0	0	0	0	0	0	0	0	0	0	0	0
XM_019846427	105032742	LOC105032742	WASH complex subunit 2, transcript variant X4	mRNA	XP_019701986.1	.	NW_011550974.1:431066-447525	1852	0	0	0	0	0	0	0	0	0	0	0	0	0	0	0	0	0	0	0	0	0	0	0	0	0	0	0	0	0	0
XM_010907281	105032743	LOC105032743	uncharacterized LOC105032743	mRNA	XP_010905583.1	.	NW_011550974.1:448331-452401	640	0	0	0	0	0	0	0	0	0	0	0	0	0	0	0	0	0	0	0	0	0	0	0	0	0	0	0	0	0	0
XM_010907283	105032744	LOC105032744	putative ATPase N2B, transcript variant X2	mRNA	XP_010905585.1	.	NW_011550974.1:470641-500661	2174	0	0	0	0	0	0	0	0	0	0	0	0	0	0	0	0	0	0	0	0	0	0	0	0	0	0	0	0	0	0
XM_029261122	105032744	LOC105032744	putative ATPase N2B, transcript variant X1	mRNA	XP_029116955.1	.	NW_011550974.1:470641-500663	2306	0	0	0	0	0	0	0	0	0	0	0	0	0	0	0	0	0	0	0	0	0	0	0	0	0	0	0	0	0	0
XM_019846418	105032744	LOC105032744	putative ATPase N2B, transcript variant X3	mRNA	XP_019701977.1	.	NW_011550974.1:470641-500664	2196	0	0	0	0	0	0	0	0	0	0	0	0	0	0	0	0	0	0	0	0	0	0	0	0	0	0	0	0	0	0
XM_029261123	105032744	LOC105032744	putative ATPase N2B, transcript variant X5	mRNA	XP_029116956.1	.	NW_011550974.1:470641-500667	2173	0	0	0	0	0	0	0	0	0	0	0	0	0	0	0	0	0	0	0	0	0	0	0	0	0	0	0	0	0	0
XM_019846420	105032744	LOC105032744	putative ATPase N2B, transcript variant X4	mRNA	XP_019701979.1	.	NW_011550974.1:470654-500665	2420	0	0	0	0	0	0	0	0	0	0	0	0	0	0	0	0	0	0	0	0	0	0	0	0	0	0	0	0	0	0
XM_010907327	105032745	LOC105032745	pathogen-associated molecular patterns-induced protein A70	mRNA	XP_010905629.2	.	chr1:4989176-4990303	1128	10	7	99	168	128	8	1	219	108	18	0.445673	0.31792	19.3188	29.659	18.2842	0.34335	0.037585	40.5896	21.6461	0.757561	0.616208	0.444975	36.2052	51.219	32.5711	0.421805	0.049398	79.9463	40.8238	0.953932
XR_829869	105032746	LOC105032746	uncharacterized LOC105032746	ncRNA	.	.	NW_011550974.1:509668-510676	839	0	0	0	0	0	0	0	0	0	0	0	0	0	0	0	0	0	0	0	0	0	0	0	0	0	0	0	0	0	0
XM_010907289	105032747	LOC105032747	protein ULTRAPETALA 1	mRNA	XP_010905591.1	.	NW_011550974.1:565089-573927	1526	0	0	0	0	0	0	0	0	0	0	0	0	0	0	0	0	0	0	0	0	0	0	0	0	0	0	0	0	0	0
XM_010907290	105032748	LOC105032748	receptor-like protein kinase THESEUS 1	mRNA	XP_010905592.1	.	NW_011550974.1:582531-586090	3560	0	0	0	0	0	0	0	0	0	0	0	0	0	0	0	0	0	0	0	0	0	0	0	0	0	0	0	0	0	0
XM_010907291	105032749	LOC105032749	uncharacterized LOC105032749	mRNA	XP_010905593.1	.	NW_011550974.1:681753-682198	446	0	0	0	0	0	0	0	0	0	0	0	0	0	0	0	0	0	0	0	0	0	0	0	0	0	0	0	0	0	0
XM_010907294	105032750	LOC105032750	uncharacterized LOC105032750, transcript variant X4	mRNA	XP_010905596.1	.	NW_011550974.1:685269-688488	2625	0	0	0	0	0	0	0	0	0	0	0	0	0	0	0	0	0	0	0	0	0	0	0	0	0	0	0	0	0	0
XM_010907296	105032750	LOC105032750	uncharacterized LOC105032750, transcript variant X5	mRNA	XP_010905598.1	.	NW_011550974.1:685269-688670	2730	0	0	0	0	0	0	0	0	0	0	0	0	0	0	0	0	0	0	0	0	0	0	0	0	0	0	0	0	0	0
XM_019846423	105032750	LOC105032750	uncharacterized LOC105032750, transcript variant X2	mRNA	XP_019701982.1	.	NW_011550974.1:685269-696308	2943	0	0	0	0	0	0	0	0	0	0	0	0	0	0	0	0	0	0	0	0	0	0	0	0	0	0	0	0	0	0
XM_010907292	105032750	LOC105032750	uncharacterized LOC105032750, transcript variant X1	mRNA	XP_010905594.1	.	NW_011550974.1:685269-696311	2914	0	0	0	0	0	0	0	0	0	0	0	0	0	0	0	0	0	0	0	0	0	0	0	0	0	0	0	0	0	0
XM_010907293	105032750	LOC105032750	uncharacterized LOC105032750, transcript variant X3	mRNA	XP_010905595.1	.	NW_011550974.1:685269-696311	2905	0	0	0	0	0	0	0	0	0	0	0	0	0	0	0	0	0	0	0	0	0	0	0	0	0	0	0	0	0	0
XM_010907297	105032751	LOC105032751	internal alternative NAD(P)H-ubiquinone oxidoreductase A1, mitochondrial	mRNA	XP_010905599.1	.	NW_011550974.1:749022-755611	2272	0	0	0	0	0	0	0	0	0	0	0	0	0	0	0	0	0	0	0	0	0	0	0	0	0	0	0	0	0	0
XM_010907298	105032752	LOC105032752	BTB/POZ domain-containing protein At5g03250	mRNA	XP_010905600.1	.	NW_011550974.1:825760-831085	2198	0	0	0	0	0	0	0	0	0	0	0	0	0	0	0	0	0	0	0	0	0	0	0	0	0	0	0	0	0	0
XR_002163393	105032753	LOC105032753	secretory carrier-associated membrane protein 2, transcript variant X2	misc_RNA	.	.	NW_011550974.1:871376-881462	1560	0	0	0	0	0	0	0	0	0	0	0	0	0	0	0	0	0	0	0	0	0	0	0	0	0	0	0	0	0	0
XM_010907300	105032753	LOC105032753	secretory carrier-associated membrane protein 2, transcript variant X1	mRNA	XP_010905602.1	.	NW_011550974.1:871376-881490	1523	0	0	0	0	0	0	0	0	0	0	0	0	0	0	0	0	0	0	0	0	0	0	0	0	0	0	0	0	0	0
XR_003798776	105032754	LOC105032754	uncharacterized LOC105032754	misc_RNA	.	.	NW_011550974.1:883696-888902	4217	0	0	0	0	0	0	0	0	0	0	0	0	0	0	0	0	0	0	0	0	0	0	0	0	0	0	0	0	0	0
XR_829871	105032755	LOC105032755	katanin p80 WD40 repeat-containing subunit B1 homolog, transcript variant X8	misc_RNA	.	.	NW_011550974.1:963980-979564	3343	0	0	0	0	0	0	0	0	0	0	0	0	0	0	0	0	0	0	0	0	0	0	0	0	0	0	0	0	0	0
XR_829870	105032755	LOC105032755	katanin p80 WD40 repeat-containing subunit B1 homolog, transcript variant X6	misc_RNA	.	.	NW_011550974.1:964079-979560	3366	0	0	0	0	0	0	0	0	0	0	0	0	0	0	0	0	0	0	0	0	0	0	0	0	0	0	0	0	0	0
XM_010907306	105032755	LOC105032755	katanin p80 WD40 repeat-containing subunit B1 homolog, transcript variant X5	mRNA	XP_010905608.1	.	NW_011550974.1:964113-979151	4488	0	0	0	0	0	0	0	0	0	0	0	0	0	0	0	0	0	0	0	0	0	0	0	0	0	0	0	0	0	0
XM_010907307	105032755	LOC105032755	katanin p80 WD40 repeat-containing subunit B1 homolog, transcript variant X4	mRNA	XP_010905609.1	.	NW_011550974.1:964113-979554	3252	0	0	0	0	0	0	0	0	0	0	0	0	0	0	0	0	0	0	0	0	0	0	0	0	0	0	0	0	0	0
XM_029261125	105032755	LOC105032755	katanin p80 WD40 repeat-containing subunit B1 homolog, transcript variant X2	mRNA	XP_029116958.1	.	NW_011550974.1:964113-979555	3206	0	0	0	0	0	0	0	0	0	0	0	0	0	0	0	0	0	0	0	0	0	0	0	0	0	0	0	0	0	0
XM_010907302	105032755	LOC105032755	katanin p80 WD40 repeat-containing subunit B1 homolog, transcript variant X1	mRNA	XP_010905604.1	.	NW_011550974.1:964113-979556	3324	0	0	0	0	0	0	0	0	0	0	0	0	0	0	0	0	0	0	0	0	0	0	0	0	0	0	0	0	0	0
XM_010907305	105032755	LOC105032755	katanin p80 WD40 repeat-containing subunit B1 homolog, transcript variant X3	mRNA	XP_010905607.1	.	NW_011550974.1:964113-979560	3202	0	0	0	0	0	0	0	0	0	0	0	0	0	0	0	0	0	0	0	0	0	0	0	0	0	0	0	0	0	0
XR_003798777	105032755	LOC105032755	katanin p80 WD40 repeat-containing subunit B1 homolog, transcript variant X7	misc_RNA	.	.	NW_011550974.1:965208-979560	2767	0	0	0	0	0	0	0	0	0	0	0	0	0	0	0	0	0	0	0	0	0	0	0	0	0	0	0	0	0	0
gene-LOC105032756	105032756	LOC105032756	.	Gene	.	.	NW_011550974.1:260072-260929	751	0	0	0	0	0	0	0	0	0	0	0	0	0	0	0	0	0	0	0	0	0	0	0	0	0	0	0	0	0	0
XM_010907308	105032757	LOC105032757	zinc finger BED domain-containing protein RICESLEEPER 2-like	mRNA	XP_010905610.1	.	NW_011550974.1:343413-344482	759	0	0	0	0	0	0	0	0	0	0	0	0	0	0	0	0	0	0	0	0	0	0	0	0	0	0	0	0	0	0
XM_010907310	105032758	LOC105032758	uncharacterized LOC105032758	mRNA	XP_010905612.1	.	NW_011550975.1:313000-328755	1188	0	0	0	0	0	0	0	0	0	0	0	0	0	0	0	0	0	0	0	0	0	0	0	0	0	0	0	0	0	0
XR_003798779	105032759	LOC105032759	probable inactive poly [ADP-ribose] polymerase SRO1, transcript variant X4	misc_RNA	.	.	NW_011550975.1:361526-412502	3763	0	0	0	0	0	0	0	0	0	0	0	0	0	0	0	0	0	0	0	0	0	0	0	0	0	0	0	0	0	0
XR_003798781	105032759	LOC105032759	probable inactive poly [ADP-ribose] polymerase SRO1, transcript variant X7	misc_RNA	.	.	NW_011550975.1:361526-412502	3639	0	0	0	0	0	0	0	0	0	0	0	0	0	0	0	0	0	0	0	0	0	0	0	0	0	0	0	0	0	0
XM_029261127	105032759	LOC105032759	probable inactive poly [ADP-ribose] polymerase SRO1, transcript variant X2	mRNA	XP_029116960.1	.	NW_011550975.1:372672-412502	3641	0	0	0	0	0	0	0	0	0	0	0	0	0	0	0	0	0	0	0	0	0	0	0	0	0	0	0	0	0	0
XR_003798780	105032759	LOC105032759	probable inactive poly [ADP-ribose] polymerase SRO1, transcript variant X5	misc_RNA	.	.	NW_011550975.1:372673-412502	3504	0	0	0	0	0	0	0	0	0	0	0	0	0	0	0	0	0	0	0	0	0	0	0	0	0	0	0	0	0	0
XM_010907315	105032759	LOC105032759	probable inactive poly [ADP-ribose] polymerase SRO1, transcript variant X6	mRNA	XP_010905617.1	.	NW_011550975.1:373722-412502	3332	0	0	0	0	0	0	0	0	0	0	0	0	0	0	0	0	0	0	0	0	0	0	0	0	0	0	0	0	0	0
XR_003798782	105032759	LOC105032759	probable inactive poly [ADP-ribose] polymerase SRO1, transcript variant X8	misc_RNA	.	.	NW_011550975.1:373722-412502	3393	0	0	0	0	0	0	0	0	0	0	0	0	0	0	0	0	0	0	0	0	0	0	0	0	0	0	0	0	0	0
XM_029261128	105032759	LOC105032759	probable inactive poly [ADP-ribose] polymerase SRO1, transcript variant X10	mRNA	XP_029116961.1	.	NW_011550975.1:379624-412502	16622	0	0	0	0	0	0	0	0	0	0	0	0	0	0	0	0	0	0	0	0	0	0	0	0	0	0	0	0	0	0
XR_003798783	105032759	LOC105032759	probable inactive poly [ADP-ribose] polymerase SRO1, transcript variant X9	misc_RNA	.	.	NW_011550975.1:379624-412502	16683	0	0	0	0	0	0	0	0	0	0	0	0	0	0	0	0	0	0	0	0	0	0	0	0	0	0	0	0	0	0
XM_029261129	105032759	LOC105032759	probable inactive poly [ADP-ribose] polymerase SRO1, transcript variant X11	mRNA	XP_029116962.1	.	NW_011550975.1:397704-412502	3109	0	0	0	0	0	0	0	0	0	0	0	0	0	0	0	0	0	0	0	0	0	0	0	0	0	0	0	0	0	0
XM_010907314	105032759	LOC105032759	probable inactive poly [ADP-ribose] polymerase SRO1, transcript variant X3	mRNA	XP_010905616.1	.	NW_011550975.1:398555-412502	2989	0	0	0	0	0	0	0	0	0	0	0	0	0	0	0	0	0	0	0	0	0	0	0	0	0	0	0	0	0	0
XM_010907313	105032759	LOC105032759	probable inactive poly [ADP-ribose] polymerase SRO1, transcript variant X12	mRNA	XP_010905615.1	.	NW_011550975.1:398557-412480	2973	0	0	0	0	0	0	0	0	0	0	0	0	0	0	0	0	0	0	0	0	0	0	0	0	0	0	0	0	0	0
XM_010907312	105032759	LOC105032759	probable inactive poly [ADP-ribose] polymerase SRO1, transcript variant X1	mRNA	XP_010905614.1	.	NW_011550975.1:398557-412502	3003	0	0	0	0	0	0	0	0	0	0	0	0	0	0	0	0	0	0	0	0	0	0	0	0	0	0	0	0	0	0
XM_010907316	105032759	LOC105032759	probable inactive poly [ADP-ribose] polymerase SRO1, transcript variant X13	mRNA	XP_010905618.1	.	NW_011550975.1:398557-412502	2916	0	0	0	0	0	0	0	0	0	0	0	0	0	0	0	0	0	0	0	0	0	0	0	0	0	0	0	0	0	0
XM_010907317	105032760	LOC105032760	monoacylglycerol lipase	mRNA	XP_010905619.2	.	NW_011550975.1:564651-583078	1271	0	0	0	0	0	0	0	0	0	0	0	0	0	0	0	0	0	0	0	0	0	0	0	0	0	0	0	0	0	0
XM_029261130	105032761	LOC105032761	N-alpha-acetyltransferase 40	mRNA	XP_029116963.1	.	NW_011550975.1:674828-709786	1839	0	0	0	0	0	0	0	0	0	0	0	0	0	0	0	0	0	0	0	0	0	0	0	0	0	0	0	0	0	0
XM_010907320	105032762	LOC105032762	65-kDa microtubule-associated protein 6	mRNA	XP_010905622.1	.	NW_011550975.1:736249-746271	2910	0	0	0	0	0	0	0	0	0	0	0	0	0	0	0	0	0	0	0	0	0	0	0	0	0	0	0	0	0	0
XM_019846429	105032763	LOC105032763	uncharacterized LOC105032763, transcript variant X1	mRNA	XP_019701988.1	.	NW_011550975.1:916135-928303	977	0	0	0	0	0	0	0	0	0	0	0	0	0	0	0	0	0	0	0	0	0	0	0	0	0	0	0	0	0	0
XM_010907321	105032763	LOC105032763	uncharacterized LOC105032763, transcript variant X2	mRNA	XP_010905623.1	.	NW_011550975.1:916135-928344	930	0	0	0	0	0	0	0	0	0	0	0	0	0	0	0	0	0	0	0	0	0	0	0	0	0	0	0	0	0	0
XM_010907323	105032764	LOC105032764	flavonoid 3',5'-hydroxylase 1	mRNA	XP_010905625.2	.	NW_011550975.1:983966-989802	1857	0	0	0	0	0	0	0	0	0	0	0	0	0	0	0	0	0	0	0	0	0	0	0	0	0	0	0	0	0	0
XM_010907324	105032765	LOC105032765	uncharacterized LOC105032765	mRNA	XP_010905626.1	.	NW_011550975.1:366827-369337	1845	0	0	0	0	0	0	0	0	0	0	0	0	0	0	0	0	0	0	0	0	0	0	0	0	0	0	0	0	0	0
XM_010907325	105032766	LOC105032766	uncharacterized LOC105032766	mRNA	XP_010905627.1	.	NW_011550975.1:492117-492647	531	0	0	0	0	0	0	0	0	0	0	0	0	0	0	0	0	0	0	0	0	0	0	0	0	0	0	0	0	0	0
XM_029261126	105032767	LOC105032767	type IV inositol polyphosphate 5-phosphatase 9, transcript variant X2	mRNA	XP_029116959.1	.	NW_011550975.1:603452-606517	1310	0	0	0	0	0	0	0	0	0	0	0	0	0	0	0	0	0	0	0	0	0	0	0	0	0	0	0	0	0	0
XM_010907326	105032767	LOC105032767	type IV inositol polyphosphate 5-phosphatase 9, transcript variant X1	mRNA	XP_010905628.3	.	NW_011550975.1:603564-606517	1479	0	0	0	0	0	0	0	0	0	0	0	0	0	0	0	0	0	0	0	0	0	0	0	0	0	0	0	0	0	0
XM_010907331	105032768	LOC105032768	caffeoylshikimate esterase	mRNA	XP_010905633.1	.	chr1:62294505-62295806	1302	25	3	6	12	14	7	11	17	16	4	0.951411	0.11346	0.979489	1.69924	1.65795	0.268488	0.35497	2.61107	2.70614	0.119033	1.31546	0.158804	1.83565	2.93448	2.95343	0.329836	0.466538	5.14282	5.10369	0.149889
XM_010907328	105032769	LOC105032769	upstream activation factor subunit spp27, transcript variant X1	mRNA	XP_010905630.1	.	NW_011550976.1:67856-86775	1359	0	0	0	0	0	0	0	0	0	0	0	0	0	0	0	0	0	0	0	0	0	0	0	0	0	0	0	0	0	0
XM_010907329	105032769	LOC105032769	upstream activation factor subunit spp27, transcript variant X2	mRNA	XP_010905631.1	.	NW_011550976.1:67858-86775	1354	0	0	0	0	0	0	0	0	0	0	0	0	0	0	0	0	0	0	0	0	0	0	0	0	0	0	0	0	0	0
XM_010907330	105032770	LOC105032770	transcription factor NIGTH1	mRNA	XP_010905632.2	.	NW_011550976.1:121734-123723	1337	0	0	0	0	0	0	0	0	0	0	0	0	0	0	0	0	0	0	0	0	0	0	0	0	0	0	0	0	0	0
XM_019846434	105032771	LOC105032771	protein misato homolog 1	mRNA	XP_019701993.1	.	NW_011550976.1:147215-173541	2358	0	0	0	0	0	0	0	0	0	0	0	0	0	0	0	0	0	0	0	0	0	0	0	0	0	0	0	0	0	0
XR_829872	105032772	LOC105032772	uncharacterized LOC105032772	ncRNA	.	.	NW_011550976.1:174257-175015	683	0	0	0	0	0	0	0	0	0	0	0	0	0	0	0	0	0	0	0	0	0	0	0	0	0	0	0	0	0	0
XR_003798787	105032773	LOC105032773	LOB domain-containing protein 36, transcript variant X3	misc_RNA	.	.	NW_011550976.1:274236-276414	1548	0	0	0	0	0	0	0	0	0	0	0	0	0	0	0	0	0	0	0	0	0	0	0	0	0	0	0	0	0	0
XM_019846436	105032773	LOC105032773	LOB domain-containing protein 36, transcript variant X2	mRNA	XP_019701995.1	.	NW_011550976.1:274236-276755	1881	0	0	0	0	0	0	0	0	0	0	0	0	0	0	0	0	0	0	0	0	0	0	0	0	0	0	0	0	0	0
XR_002163403	105032773	LOC105032773	LOB domain-containing protein 36, transcript variant X1	misc_RNA	.	.	NW_011550976.1:274236-276755	1514	0	0	0	0	0	0	0	0	0	0	0	0	0	0	0	0	0	0	0	0	0	0	0	0	0	0	0	0	0	0
XR_003798788	105032773	LOC105032773	LOB domain-containing protein 36, transcript variant X4	misc_RNA	.	.	NW_011550976.1:274236-276755	1547	0	0	0	0	0	0	0	0	0	0	0	0	0	0	0	0	0	0	0	0	0	0	0	0	0	0	0	0	0	0
XM_010907335	105032774	LOC105032774	mitogen-activated protein kinase kinase kinase 5	mRNA	XP_010905637.1	.	NW_011550976.1:344009-360546	3096	0	0	0	0	0	0	0	0	0	0	0	0	0	0	0	0	0	0	0	0	0	0	0	0	0	0	0	0	0	0
XR_002163398	105032775	LOC105032775	uncharacterized LOC105032775, transcript variant X8	misc_RNA	.	.	NW_011550976.1:378295-383792	1430	0	0	0	0	0	0	0	0	0	0	0	0	0	0	0	0	0	0	0	0	0	0	0	0	0	0	0	0	0	0
XR_003798789	105032775	LOC105032775	uncharacterized LOC105032775, transcript variant X2	misc_RNA	.	.	NW_011550976.1:378295-383801	2191	0	0	0	0	0	0	0	0	0	0	0	0	0	0	0	0	0	0	0	0	0	0	0	0	0	0	0	0	0	0
XR_003798790	105032775	LOC105032775	uncharacterized LOC105032775, transcript variant X3	misc_RNA	.	.	NW_011550976.1:378295-383801	2167	0	0	0	0	0	0	0	0	0	0	0	0	0	0	0	0	0	0	0	0	0	0	0	0	0	0	0	0	0	0
XR_003798791	105032775	LOC105032775	uncharacterized LOC105032775, transcript variant X4	misc_RNA	.	.	NW_011550976.1:378295-383801	2112	0	0	0	0	0	0	0	0	0	0	0	0	0	0	0	0	0	0	0	0	0	0	0	0	0	0	0	0	0	0
XR_003798792	105032775	LOC105032775	uncharacterized LOC105032775, transcript variant X5	misc_RNA	.	.	NW_011550976.1:378295-383801	1694	0	0	0	0	0	0	0	0	0	0	0	0	0	0	0	0	0	0	0	0	0	0	0	0	0	0	0	0	0	0
XR_003798793	105032775	LOC105032775	uncharacterized LOC105032775, transcript variant X6	misc_RNA	.	.	NW_011550976.1:378295-383801	1670	0	0	0	0	0	0	0	0	0	0	0	0	0	0	0	0	0	0	0	0	0	0	0	0	0	0	0	0	0	0
XR_003798794	105032775	LOC105032775	uncharacterized LOC105032775, transcript variant X10	misc_RNA	.	.	NW_011550976.1:378619-383798	2411	0	0	0	0	0	0	0	0	0	0	0	0	0	0	0	0	0	0	0	0	0	0	0	0	0	0	0	0	0	0
XM_029261131	105032775	LOC105032775	uncharacterized LOC105032775, transcript variant X1	mRNA	XP_029116964.1	.	NW_011550976.1:378619-383801	2329	0	0	0	0	0	0	0	0	0	0	0	0	0	0	0	0	0	0	0	0	0	0	0	0	0	0	0	0	0	0
XR_002163397	105032775	LOC105032775	uncharacterized LOC105032775, transcript variant X9	misc_RNA	.	.	NW_011550976.1:378625-383793	1710	0	0	0	0	0	0	0	0	0	0	0	0	0	0	0	0	0	0	0	0	0	0	0	0	0	0	0	0	0	0
XM_019846433	105032775	LOC105032775	uncharacterized LOC105032775, transcript variant X7	mRNA	XP_019701992.1	.	NW_011550976.1:379628-383793	1204	0	0	0	0	0	0	0	0	0	0	0	0	0	0	0	0	0	0	0	0	0	0	0	0	0	0	0	0	0	0
XM_029261132	105032775	LOC105032775	uncharacterized LOC105032775, transcript variant X11	mRNA	XP_029116965.1	.	NW_011550976.1:380294-383798	941	0	0	0	0	0	0	0	0	0	0	0	0	0	0	0	0	0	0	0	0	0	0	0	0	0	0	0	0	0	0
XM_010907338	105032776	LOC105032776	DNA polymerase kappa, transcript variant X3	mRNA	XP_010905640.1	.	NW_011550976.1:392038-407893	2296	0	0	0	0	0	0	0	0	0	0	0	0	0	0	0	0	0	0	0	0	0	0	0	0	0	0	0	0	0	0
XM_010907340	105032776	LOC105032776	DNA polymerase kappa, transcript variant X4	mRNA	XP_010905642.1	.	NW_011550976.1:392038-407893	2122	0	0	0	0	0	0	0	0	0	0	0	0	0	0	0	0	0	0	0	0	0	0	0	0	0	0	0	0	0	0
XM_029261133	105032776	LOC105032776	DNA polymerase kappa, transcript variant X1	mRNA	XP_029116966.1	.	NW_011550976.1:396097-407893	1919	0	0	0	0	0	0	0	0	0	0	0	0	0	0	0	0	0	0	0	0	0	0	0	0	0	0	0	0	0	0
XM_029261134	105032776	LOC105032776	DNA polymerase kappa, transcript variant X2	mRNA	XP_029116967.1	.	NW_011550976.1:396097-412924	1879	0	0	0	0	0	0	0	0	0	0	0	0	0	0	0	0	0	0	0	0	0	0	0	0	0	0	0	0	0	0
gene-LOC105032777	105032777	LOC105032777	.	Gene	.	.	chr1:60723974-60768810	1563	0	0	0	0	0	0	0	0	0	0	0	0	0	0	0	0	0	0	0	0	0	0	0	0	0	0	0	0	0	0
XM_010907341	105032778	LOC105032778	uncharacterized LOC105032778	mRNA	XP_010905643.2	.	NW_011550976.1:412595-422018	4178	0	0	0	0	0	0	0	0	0	0	0	0	0	0	0	0	0	0	0	0	0	0	0	0	0	0	0	0	0	0
XM_010907342	105032779	LOC105032779	cyclin-D5-1	mRNA	XP_010905644.2	.	NW_011550976.1:431010-433233	1865	0	0	0	0	0	0	0	0	0	0	0	0	0	0	0	0	0	0	0	0	0	0	0	0	0	0	0	0	0	0
XM_010907343	105032780	LOC105032780	uncharacterized LOC105032780	mRNA	XP_010905645.3	.	NW_011550976.1:941461-967735	4592	0	0	0	0	0	0	0	0	0	0	0	0	0	0	0	0	0	0	0	0	0	0	0	0	0	0	0	0	0	0
XR_002163402	105032781	LOC105032781	uncharacterized LOC105032781, transcript variant X2	ncRNA	.	.	NW_011550976.1:1011957-1028566	1227	0	0	0	0	0	0	0	0	0	0	0	0	0	0	0	0	0	0	0	0	0	0	0	0	0	0	0	0	0	0
XR_829873	105032781	LOC105032781	uncharacterized LOC105032781, transcript variant X1	ncRNA	.	.	NW_011550976.1:1012411-1028563	1098	0	0	0	0	0	0	0	0	0	0	0	0	0	0	0	0	0	0	0	0	0	0	0	0	0	0	0	0	0	0
XR_003798786	105032782	LOC105032782	uncharacterized LOC105032782	ncRNA	.	.	NW_011550976.1:182994-187085	2003	0	0	0	0	0	0	0	0	0	0	0	0	0	0	0	0	0	0	0	0	0	0	0	0	0	0	0	0	0	0
XM_010907344	105032783	LOC105032783	glucan endo-1,3-beta-glucosidase 13	mRNA	XP_010905646.1	.	NW_011550976.1:936086-939088	1595	0	0	0	0	0	0	0	0	0	0	0	0	0	0	0	0	0	0	0	0	0	0	0	0	0	0	0	0	0	0
XM_010907345	105032784	LOC105032784	uncharacterized LOC105032784	mRNA	XP_010905647.1	.	NW_011550976.1:999149-1000038	747	0	0	0	0	0	0	0	0	0	0	0	0	0	0	0	0	0	0	0	0	0	0	0	0	0	0	0	0	0	0
XM_010907346	105032785	LOC105032785	transcription factor bHLH139	mRNA	XP_010905648.3	.	NW_011550976.1:1003535-1005107	1014	0	0	0	0	0	0	0	0	0	0	0	0	0	0	0	0	0	0	0	0	0	0	0	0	0	0	0	0	0	0
XM_010907347	105032786	LOC105032786	epimerase family protein SDR39U1 homolog, chloroplastic, transcript variant X1	mRNA	XP_010905649.1	.	NW_011550977.1:131878-238513	1378	0	0	0	0	0	0	0	0	0	0	0	0	0	0	0	0	0	0	0	0	0	0	0	0	0	0	0	0	0	0
XM_010907348	105032786	LOC105032786	epimerase family protein SDR39U1 homolog, chloroplastic, transcript variant X2	mRNA	XP_010905650.1	.	NW_011550977.1:131878-238513	1369	0	0	0	0	0	0	0	0	0	0	0	0	0	0	0	0	0	0	0	0	0	0	0	0	0	0	0	0	0	0
XM_010907349	105032786	LOC105032786	epimerase family protein SDR39U1 homolog, chloroplastic, transcript variant X3	mRNA	XP_010905651.1	.	NW_011550977.1:131878-238513	1318	0	0	0	0	0	0	0	0	0	0	0	0	0	0	0	0	0	0	0	0	0	0	0	0	0	0	0	0	0	0
XM_010907351	105032786	LOC105032786	epimerase family protein SDR39U1 homolog, chloroplastic, transcript variant X4	mRNA	XP_010905653.1	.	NW_011550977.1:131878-238513	1267	0	0	0	0	0	0	0	0	0	0	0	0	0	0	0	0	0	0	0	0	0	0	0	0	0	0	0	0	0	0
XM_010907352	105032786	LOC105032786	epimerase family protein SDR39U1 homolog, chloroplastic, transcript variant X6	mRNA	XP_010905654.1	.	NW_011550977.1:131878-238513	1186	0	0	0	0	0	0	0	0	0	0	0	0	0	0	0	0	0	0	0	0	0	0	0	0	0	0	0	0	0	0
XM_029261135	105032786	LOC105032786	epimerase family protein SDR39U1 homolog, chloroplastic, transcript variant X5	mRNA	XP_029116968.1	.	NW_011550977.1:135233-238513	1648	0	0	0	0	0	0	0	0	0	0	0	0	0	0	0	0	0	0	0	0	0	0	0	0	0	0	0	0	0	0
XM_010907353	105032787	LOC105032787	tyrosine decarboxylase 1-like	mRNA	XP_010905655.1	.	chr1:60828338-60830113	1776	0	0	8	17	0	0	0	9	15	0	0	0	0.924889	1.85105	0	0	0	0.975849	1.79483	0	0	0	1.73332	3.19664	0	0	0	1.92206	3.38499	0
XM_010907354	105032788	LOC105032788	30S ribosomal protein S31, mitochondrial	mRNA	XP_010905656.1	.	NW_011550977.1:762348-762875	528	0	0	0	0	0	0	0	0	0	0	0	0	0	0	0	0	0	0	0	0	0	0	0	0	0	0	0	0	0	0
XR_829874	105032790	LOC105032790	stress-associated endoplasmic reticulum protein 2	ncRNA	.	.	NW_011550978.1:23361-29062	644	0	0	0	0	0	0	0	0	0	0	0	0	0	0	0	0	0	0	0	0	0	0	0	0	0	0	0	0	0	0
XM_010907356	105032791	LOC105032791	F-box protein SNE	mRNA	XP_010905658.1	.	NW_011550978.1:109052-109986	935	0	0	0	0	0	0	0	0	0	0	0	0	0	0	0	0	0	0	0	0	0	0	0	0	0	0	0	0	0	0
XM_010907357	105032792	LOC105032792	probable methionine--tRNA ligase	mRNA	XP_010905659.1	.	NW_011550978.1:259192-299370	2709	0	0	0	0	0	0	0	0	0	0	0	0	0	0	0	0	0	0	0	0	0	0	0	0	0	0	0	0	0	0
XM_010907359	105032793	LOC105032793	serine acetyltransferase 1, chloroplastic	mRNA	XP_010905661.1	.	NW_011550978.1:369028-370918	1891	0	0	0	0	0	0	0	0	0	0	0	0	0	0	0	0	0	0	0	0	0	0	0	0	0	0	0	0	0	0
XM_010907360	105032794	LOC105032794	pentatricopeptide repeat-containing protein At4g26680, mitochondrial, transcript variant X1	mRNA	XP_010905662.1	.	NW_011550978.1:371935-393873	2929	0	0	0	0	0	0	0	0	0	0	0	0	0	0	0	0	0	0	0	0	0	0	0	0	0	0	0	0	0	0
XM_010907361	105032794	LOC105032794	pentatricopeptide repeat-containing protein At4g26680, mitochondrial, transcript variant X2	mRNA	XP_010905663.1	.	NW_011550978.1:371935-393873	2942	0	0	0	0	0	0	0	0	0	0	0	0	0	0	0	0	0	0	0	0	0	0	0	0	0	0	0	0	0	0
gene-LOC105032795	105032795	LOC105032795	.	Gene	.	.	chr1:61267752-61270278	765	0	0	0	0	0	0	0	0	0	0	0	0	0	0	0	0	0	0	0	0	0	0	0	0	0	0	0	0	0	0
XM_010907363	105032796	LOC105032796	serine acetyltransferase 1, chloroplastic	mRNA	XP_010905665.1	.	NW_011550978.1:473595-474836	1242	0	0	0	0	0	0	0	0	0	0	0	0	0	0	0	0	0	0	0	0	0	0	0	0	0	0	0	0	0	0
XM_010907364	105032797	LOC105032797	30S ribosomal protein S10, chloroplastic	mRNA	XP_010905666.1	.	NW_011550978.1:581943-586154	910	0	0	0	0	0	0	0	0	0	0	0	0	0	0	0	0	0	0	0	0	0	0	0	0	0	0	0	0	0	0
XM_010907365	105032798	LOC105032798	transcriptional adapter ADA2, transcript variant X1	mRNA	XP_010905667.2	.	NW_011550978.1:657896-728225	2271	0	0	0	0	0	0	0	0	0	0	0	0	0	0	0	0	0	0	0	0	0	0	0	0	0	0	0	0	0	0
XM_029261137	105032798	LOC105032798	transcriptional adapter ADA2, transcript variant X2	mRNA	XP_029116970.1	.	NW_011550978.1:657896-729493	2311	0	0	0	0	0	0	0	0	0	0	0	0	0	0	0	0	0	0	0	0	0	0	0	0	0	0	0	0	0	0
XM_010907366	105032799	LOC105032799	plant-specific TFIIB-related protein 1	mRNA	XP_010905668.1	.	NW_011550978.1:759842-791121	2144	0	0	0	0	0	0	0	0	0	0	0	0	0	0	0	0	0	0	0	0	0	0	0	0	0	0	0	0	0	0
gene-LOC105032800	105032800	LOC105032800	.	Gene	.	.	NW_011550978.1:372893-374139	1247	0	0	0	0	0	0	0	0	0	0	0	0	0	0	0	0	0	0	0	0	0	0	0	0	0	0	0	0	0	0
XM_010907367	105032801	LOC105032801	agmatine coumaroyltransferase-2	mRNA	XP_010905669.1	.	NW_011550979.1:73942-75469	1528	0	0	0	0	0	0	0	0	0	0	0	0	0	0	0	0	0	0	0	0	0	0	0	0	0	0	0	0	0	0
XM_010907368	105032802	LOC105032802	COBRA-like protein 7	mRNA	XP_010905670.1	.	NW_011550979.1:319033-321758	2724	0	0	0	0	0	0	0	0	0	0	0	0	0	0	0	0	0	0	0	0	0	0	0	0	0	0	0	0	0	0
XM_010907369	105032803	LOC105032803	two-component response regulator ARR1	mRNA	XP_010905671.1	.	NW_011550979.1:334231-342570	3066	0	0	0	0	0	0	0	0	0	0	0	0	0	0	0	0	0	0	0	0	0	0	0	0	0	0	0	0	0	0
gene-LOC105032804	105032804	LOC105032804	.	Gene	.	.	chr1:61327538-61328666	735	0	0	0	0	0	0	0	0	0	0	0	0	0	0	0	0	0	0	0	0	0	0	0	0	0	0	0	0	0	0
XM_010907373	105032805	LOC105032805	exonuclease DPD1, chloroplastic/mitochondrial, transcript variant X7	mRNA	XP_010905675.1	.	NW_011550979.1:363544-369324	1787	0	0	0	0	0	0	0	0	0	0	0	0	0	0	0	0	0	0	0	0	0	0	0	0	0	0	0	0	0	0
XM_010907370	105032805	LOC105032805	exonuclease DPD1, chloroplastic/mitochondrial, transcript variant X1	mRNA	XP_010905672.1	.	NW_011550979.1:363545-369324	1793	0	0	0	0	0	0	0	0	0	0	0	0	0	0	0	0	0	0	0	0	0	0	0	0	0	0	0	0	0	0
XM_010907371	105032805	LOC105032805	exonuclease DPD1, chloroplastic/mitochondrial, transcript variant X3	mRNA	XP_010905673.1	.	NW_011550979.1:363545-369324	1790	0	0	0	0	0	0	0	0	0	0	0	0	0	0	0	0	0	0	0	0	0	0	0	0	0	0	0	0	0	0
XM_010907372	105032805	LOC105032805	exonuclease DPD1, chloroplastic/mitochondrial, transcript variant X2	mRNA	XP_010905674.1	.	NW_011550979.1:363546-369324	1713	0	0	0	0	0	0	0	0	0	0	0	0	0	0	0	0	0	0	0	0	0	0	0	0	0	0	0	0	0	0
XM_019846443	105032805	LOC105032805	exonuclease DPD1, chloroplastic/mitochondrial, transcript variant X4	mRNA	XP_019702002.1	.	NW_011550979.1:363979-369324	1489	0	0	0	0	0	0	0	0	0	0	0	0	0	0	0	0	0	0	0	0	0	0	0	0	0	0	0	0	0	0
XM_019846445	105032805	LOC105032805	exonuclease DPD1, chloroplastic/mitochondrial, transcript variant X6	mRNA	XP_019702004.1	.	NW_011550979.1:363979-369324	1486	0	0	0	0	0	0	0	0	0	0	0	0	0	0	0	0	0	0	0	0	0	0	0	0	0	0	0	0	0	0
XM_019846446	105032805	LOC105032805	exonuclease DPD1, chloroplastic/mitochondrial, transcript variant X8	mRNA	XP_019702005.1	.	NW_011550979.1:363979-369324	1410	0	0	0	0	0	0	0	0	0	0	0	0	0	0	0	0	0	0	0	0	0	0	0	0	0	0	0	0	0	0
XM_019846447	105032805	LOC105032805	exonuclease DPD1, chloroplastic/mitochondrial, transcript variant X9	mRNA	XP_019702006.1	.	NW_011550979.1:363979-369324	1469	0	0	0	0	0	0	0	0	0	0	0	0	0	0	0	0	0	0	0	0	0	0	0	0	0	0	0	0	0	0
XM_019846448	105032805	LOC105032805	exonuclease DPD1, chloroplastic/mitochondrial, transcript variant X10	mRNA	XP_019702007.1	.	NW_011550979.1:363979-369324	1479	0	0	0	0	0	0	0	0	0	0	0	0	0	0	0	0	0	0	0	0	0	0	0	0	0	0	0	0	0	0
XM_019846444	105032805	LOC105032805	exonuclease DPD1, chloroplastic/mitochondrial, transcript variant X5	mRNA	XP_019702003.1	.	NW_011550979.1:364145-369324	1382	0	0	0	0	0	0	0	0	0	0	0	0	0	0	0	0	0	0	0	0	0	0	0	0	0	0	0	0	0	0
XM_010907375	105032806	LOC105032806	protein DEHYDRATION-INDUCED 19 homolog 2, transcript variant X2	mRNA	XP_010905677.1	.	NW_011550979.1:449344-460044	1148	0	0	0	0	0	0	0	0	0	0	0	0	0	0	0	0	0	0	0	0	0	0	0	0	0	0	0	0	0	0
XR_003798797	105032806	LOC105032806	protein DEHYDRATION-INDUCED 19 homolog 2, transcript variant X3	misc_RNA	.	.	NW_011550979.1:449348-460172	1430	0	0	0	0	0	0	0	0	0	0	0	0	0	0	0	0	0	0	0	0	0	0	0	0	0	0	0	0	0	0
XM_029261138	105032806	LOC105032806	protein DEHYDRATION-INDUCED 19 homolog 2, transcript variant X1	mRNA	XP_029116971.1	.	NW_011550979.1:449353-460045	1170	0	0	0	0	0	0	0	0	0	0	0	0	0	0	0	0	0	0	0	0	0	0	0	0	0	0	0	0	0	0
XM_010907376	105032807	LOC105032807	calmodulin-binding protein 60 D, transcript variant X1	mRNA	XP_010905678.1	.	NW_011550979.1:501948-510480	2712	0	0	0	0	0	0	0	0	0	0	0	0	0	0	0	0	0	0	0	0	0	0	0	0	0	0	0	0	0	0
XM_010907377	105032807	LOC105032807	calmodulin-binding protein 60 D, transcript variant X2	mRNA	XP_010905679.1	.	NW_011550979.1:501948-510480	2709	0	0	0	0	0	0	0	0	0	0	0	0	0	0	0	0	0	0	0	0	0	0	0	0	0	0	0	0	0	0
XM_010907378	105032808	LOC105032808	probable protein phosphatase 2C 33	mRNA	XP_010905680.1	.	NW_011550979.1:512133-523744	2131	0	0	0	0	0	0	0	0	0	0	0	0	0	0	0	0	0	0	0	0	0	0	0	0	0	0	0	0	0	0
XM_010907380	105032809	LOC105032809	kinesin-like protein KIN-14F	mRNA	XP_010905682.1	.	NW_011550979.1:563483-572619	3843	0	0	0	0	0	0	0	0	0	0	0	0	0	0	0	0	0	0	0	0	0	0	0	0	0	0	0	0	0	0
XM_010907381	105032810	LOC105032810	peroxisomal membrane protein 11-3	mRNA	XP_010905683.1	.	NW_011550979.1:602916-604160	1245	0	0	0	0	0	0	0	0	0	0	0	0	0	0	0	0	0	0	0	0	0	0	0	0	0	0	0	0	0	0
gene-LOC105032811	105032811	LOC105032811	.	Gene	.	.	chr1:61331221-61334884	1044	0	0	0	0	0	0	0	0	0	0	0	0	0	0	0	0	0	0	0	0	0	0	0	0	0	0	0	0	0	0
XM_010907384	105032812	LOC105032812	lysophospholipid acyltransferase LPEAT1, transcript variant X3	mRNA	XP_010905686.1	.	NW_011550979.1:615990-634141	1716	0	0	0	0	0	0	0	0	0	0	0	0	0	0	0	0	0	0	0	0	0	0	0	0	0	0	0	0	0	0
XM_010907385	105032812	LOC105032812	lysophospholipid acyltransferase LPEAT1, transcript variant X4	mRNA	XP_010905687.1	.	NW_011550979.1:615990-634444	1605	0	0	0	0	0	0	0	0	0	0	0	0	0	0	0	0	0	0	0	0	0	0	0	0	0	0	0	0	0	0
XM_010907382	105032812	LOC105032812	lysophospholipid acyltransferase LPEAT1, transcript variant X1	mRNA	XP_010905684.1	.	NW_011550979.1:615991-634141	1856	0	0	0	0	0	0	0	0	0	0	0	0	0	0	0	0	0	0	0	0	0	0	0	0	0	0	0	0	0	0
XM_010907383	105032812	LOC105032812	lysophospholipid acyltransferase LPEAT1, transcript variant X2	mRNA	XP_010905685.1	.	NW_011550979.1:615991-634444	1745	0	0	0	0	0	0	0	0	0	0	0	0	0	0	0	0	0	0	0	0	0	0	0	0	0	0	0	0	0	0
XM_010907386	105032813	LOC105032813	nicotinamide adenine dinucleotide transporter 1, chloroplastic	mRNA	XP_010905688.1	.	NW_011550979.1:639024-654751	2005	0	0	0	0	0	0	0	0	0	0	0	0	0	0	0	0	0	0	0	0	0	0	0	0	0	0	0	0	0	0
XM_010907388	105032814	LOC105032814	uncharacterized LOC105032814, transcript variant X3	mRNA	XP_010905690.1	.	NW_011550979.1:662257-670400	3498	0	0	0	0	0	0	0	0	0	0	0	0	0	0	0	0	0	0	0	0	0	0	0	0	0	0	0	0	0	0
XM_029261139	105032814	LOC105032814	uncharacterized LOC105032814, transcript variant X1	mRNA	XP_029116972.1	.	NW_011550979.1:662257-670400	3558	0	0	0	0	0	0	0	0	0	0	0	0	0	0	0	0	0	0	0	0	0	0	0	0	0	0	0	0	0	0
XR_003798798	105032814	LOC105032814	uncharacterized LOC105032814, transcript variant X2	misc_RNA	.	.	NW_011550979.1:662257-670414	3175	0	0	0	0	0	0	0	0	0	0	0	0	0	0	0	0	0	0	0	0	0	0	0	0	0	0	0	0	0	0
XM_010907390	105032815	LOC105032815	uncharacterized LOC105032815, transcript variant X2	mRNA	XP_010905692.1	.	NW_011550979.1:681822-687932	1937	0	0	0	0	0	0	0	0	0	0	0	0	0	0	0	0	0	0	0	0	0	0	0	0	0	0	0	0	0	0
XM_010907389	105032815	LOC105032815	uncharacterized LOC105032815, transcript variant X1	mRNA	XP_010905691.1	.	NW_011550979.1:681828-687932	1934	0	0	0	0	0	0	0	0	0	0	0	0	0	0	0	0	0	0	0	0	0	0	0	0	0	0	0	0	0	0
XM_010907391	105032816	LOC105032816	probable N-succinyldiaminopimelate aminotransferase DapC, transcript variant X1	mRNA	XP_010905693.1	.	NW_011550979.1:747736-753294	848	0	0	0	0	0	0	0	0	0	0	0	0	0	0	0	0	0	0	0	0	0	0	0	0	0	0	0	0	0	0
XM_019846450	105032816	LOC105032816	probable N-succinyldiaminopimelate aminotransferase DapC, transcript variant X2	mRNA	XP_019702009.1	.	NW_011550979.1:747737-753294	882	0	0	0	0	0	0	0	0	0	0	0	0	0	0	0	0	0	0	0	0	0	0	0	0	0	0	0	0	0	0
XM_010907392	105032817	LOC105032817	protein FAR1-RELATED SEQUENCE 11, transcript variant X1	mRNA	XP_010905694.1	.	NW_011550979.1:759356-766291	3286	0	0	0	0	0	0	0	0	0	0	0	0	0	0	0	0	0	0	0	0	0	0	0	0	0	0	0	0	0	0
XM_010907393	105032817	LOC105032817	protein FAR1-RELATED SEQUENCE 11, transcript variant X2	mRNA	XP_010905695.1	.	NW_011550979.1:759356-766292	3209	0	0	0	0	0	0	0	0	0	0	0	0	0	0	0	0	0	0	0	0	0	0	0	0	0	0	0	0	0	0
XM_029262317	105032818	LOC105032818	protein TRANSPORT INHIBITOR RESPONSE 1-like	mRNA	XP_029118150.1	.	chr1:61360047-61379208	1599	0	0	0	0	0	0	0	0	0	0	0	0	0	0	0	0	0	0	0	0	0	0	0	0	0	0	0	0	0	0
XR_003798801	105032819	LOC105032819	uncharacterized LOC105032819, transcript variant X4	ncRNA	.	.	NW_011550979.1:886831-892712	2468	0	0	0	0	0	0	0	0	0	0	0	0	0	0	0	0	0	0	0	0	0	0	0	0	0	0	0	0	0	0
XR_003798799	105032819	LOC105032819	uncharacterized LOC105032819, transcript variant X1	ncRNA	.	.	NW_011550979.1:887287-892695	2088	0	0	0	0	0	0	0	0	0	0	0	0	0	0	0	0	0	0	0	0	0	0	0	0	0	0	0	0	0	0
XR_003798800	105032819	LOC105032819	uncharacterized LOC105032819, transcript variant X3	ncRNA	.	.	NW_011550979.1:887293-892695	1958	0	0	0	0	0	0	0	0	0	0	0	0	0	0	0	0	0	0	0	0	0	0	0	0	0	0	0	0	0	0
XR_829876	105032819	LOC105032819	uncharacterized LOC105032819, transcript variant X2	ncRNA	.	.	NW_011550979.1:887318-892695	1958	0	0	0	0	0	0	0	0	0	0	0	0	0	0	0	0	0	0	0	0	0	0	0	0	0	0	0	0	0	0
gene-LOC105032820	105032820	LOC105032820	.	Gene	.	.	NW_011550979.1:359975-360803	685	0	0	0	0	0	0	0	0	0	0	0	0	0	0	0	0	0	0	0	0	0	0	0	0	0	0	0	0	0	0
XM_010907394	105032821	LOC105032821	putative UDP-rhamnose:rhamnosyltransferase 1	mRNA	XP_010905696.1	.	NW_011550979.1:469549-470973	1425	0	0	0	0	0	0	0	0	0	0	0	0	0	0	0	0	0	0	0	0	0	0	0	0	0	0	0	0	0	0
XM_010907395	105032822	LOC105032822	uncharacterized LOC105032822	mRNA	XP_010905697.1	.	NW_011550979.1:510563-512467	1603	0	0	0	0	0	0	0	0	0	0	0	0	0	0	0	0	0	0	0	0	0	0	0	0	0	0	0	0	0	0
XM_010907396	105032823	LOC105032823	peroxisomal membrane protein 11-3	mRNA	XP_010905698.1	.	NW_011550979.1:590550-591941	1266	0	0	0	0	0	0	0	0	0	0	0	0	0	0	0	0	0	0	0	0	0	0	0	0	0	0	0	0	0	0
XM_019846449	105032824	LOC105032824	protein DOG1-like 4	mRNA	XP_019702008.1	.	NW_011550979.1:720872-725309	848	0	0	0	0	0	0	0	0	0	0	0	0	0	0	0	0	0	0	0	0	0	0	0	0	0	0	0	0	0	0
XM_010907398	105032825	LOC105032825	zinc finger protein 6-like	mRNA	XP_010905700.1	.	NW_011550979.1:840997-841582	586	0	0	0	0	0	0	0	0	0	0	0	0	0	0	0	0	0	0	0	0	0	0	0	0	0	0	0	0	0	0
XM_010907431	105032826	LOC105032826	NDR1/HIN1-like protein 13	mRNA	XP_010905733.1	.	chr1:4998307-4999710	1404	0	0	0	6	23	0	0	0	4	0	0	0	0	0.837465	2.62789	0	0	0	0.485822	0	0	0	0	1.44624	4.68126	0	0	0	0.916243	0
XM_010907399	105032827	LOC105032827	actin-101	mRNA	XP_010905701.1	.	NW_011550980.1:14059-20116	1789	0	0	0	0	0	0	0	0	0	0	0	0	0	0	0	0	0	0	0	0	0	0	0	0	0	0	0	0	0	0
XM_010907401	105032828	LOC105032828	sulfate transporter 4.1, chloroplastic, transcript variant X1	mRNA	XP_010905703.1	.	NW_011550980.1:27855-51115	2273	0	0	0	0	0	0	0	0	0	0	0	0	0	0	0	0	0	0	0	0	0	0	0	0	0	0	0	0	0	0
XM_019846458	105032828	LOC105032828	sulfate transporter 4.1, chloroplastic, transcript variant X2	mRNA	XP_019702017.1	.	NW_011550980.1:27855-51115	2258	0	0	0	0	0	0	0	0	0	0	0	0	0	0	0	0	0	0	0	0	0	0	0	0	0	0	0	0	0	0
XM_029261141	105032828	LOC105032828	sulfate transporter 4.1, chloroplastic, transcript variant X3	mRNA	XP_029116974.1	.	NW_011550980.1:27855-51115	2165	0	0	0	0	0	0	0	0	0	0	0	0	0	0	0	0	0	0	0	0	0	0	0	0	0	0	0	0	0	0
XM_010907406	105032829	LOC105032829	uncharacterized LOC105032829	mRNA	XP_010905708.1	.	chr1:61438952-61439997	1046	0	0	0	1	0	0	0	0	0	0	0	0	0	0.191361	0	0	0	0	0	0	0	0	0	0.330468	0	0	0	0	0	0
XM_019846461	105032830	LOC105032830	metal tolerance protein 5, transcript variant X4	mRNA	XP_019702020.1	.	NW_011550980.1:71879-94621	1457	0	0	0	0	0	0	0	0	0	0	0	0	0	0	0	0	0	0	0	0	0	0	0	0	0	0	0	0	0	0
XM_019846462	105032830	LOC105032830	metal tolerance protein 5, transcript variant X5	mRNA	XP_019702021.1	.	NW_011550980.1:71879-94653	1437	0	0	0	0	0	0	0	0	0	0	0	0	0	0	0	0	0	0	0	0	0	0	0	0	0	0	0	0	0	0
XM_010907402	105032830	LOC105032830	metal tolerance protein 5, transcript variant X1	mRNA	XP_010905704.1	.	NW_011550980.1:71879-94836	1615	0	0	0	0	0	0	0	0	0	0	0	0	0	0	0	0	0	0	0	0	0	0	0	0	0	0	0	0	0	0
XM_019846460	105032830	LOC105032830	metal tolerance protein 5, transcript variant X3	mRNA	XP_019702019.1	.	NW_011550980.1:71879-94837	1481	0	0	0	0	0	0	0	0	0	0	0	0	0	0	0	0	0	0	0	0	0	0	0	0	0	0	0	0	0	0
XM_010907403	105032830	LOC105032830	metal tolerance protein 5, transcript variant X2	mRNA	XP_010905705.1	.	NW_011550980.1:71879-94839	1537	0	0	0	0	0	0	0	0	0	0	0	0	0	0	0	0	0	0	0	0	0	0	0	0	0	0	0	0	0	0
XM_029261142	105032830	LOC105032830	metal tolerance protein 5, transcript variant X6	mRNA	XP_029116975.1	.	NW_011550980.1:71879-94840	1403	0	0	0	0	0	0	0	0	0	0	0	0	0	0	0	0	0	0	0	0	0	0	0	0	0	0	0	0	0	0
XM_010907404	105032831	LOC105032831	serine/threonine-protein kinase AFC1, transcript variant X1	mRNA	XP_010905706.1	.	NW_011550980.1:96088-103400	2395	0	0	0	0	0	0	0	0	0	0	0	0	0	0	0	0	0	0	0	0	0	0	0	0	0	0	0	0	0	0
XM_010907405	105032831	LOC105032831	serine/threonine-protein kinase AFC1, transcript variant X2	mRNA	XP_010905707.1	.	NW_011550980.1:96088-103400	2405	0	0	0	0	0	0	0	0	0	0	0	0	0	0	0	0	0	0	0	0	0	0	0	0	0	0	0	0	0	0
XM_010907407	105032831	LOC105032831	serine/threonine-protein kinase AFC1, transcript variant X3	mRNA	XP_010905709.1	.	NW_011550980.1:97215-103400	1638	0	0	0	0	0	0	0	0	0	0	0	0	0	0	0	0	0	0	0	0	0	0	0	0	0	0	0	0	0	0
XR_003798802	105032832	LOC105032832	uncharacterized LOC105032832, transcript variant X1	misc_RNA	.	.	NW_011550980.1:193383-237120	1904	0	0	0	0	0	0	0	0	0	0	0	0	0	0	0	0	0	0	0	0	0	0	0	0	0	0	0	0	0	0
XR_003798803	105032832	LOC105032832	uncharacterized LOC105032832, transcript variant X2	misc_RNA	.	.	NW_011550980.1:196955-237120	1752	0	0	0	0	0	0	0	0	0	0	0	0	0	0	0	0	0	0	0	0	0	0	0	0	0	0	0	0	0	0
XM_010907408	105032833	LOC105032833	myb-related protein MYBAS2, transcript variant X1	mRNA	XP_010905710.1	.	NW_011550980.1:274133-275418	977	0	0	0	0	0	0	0	0	0	0	0	0	0	0	0	0	0	0	0	0	0	0	0	0	0	0	0	0	0	0
XM_019846456	105032833	LOC105032833	myb-related protein MYBAS2, transcript variant X2	mRNA	XP_019702015.1	.	NW_011550980.1:274133-275418	919	0	0	0	0	0	0	0	0	0	0	0	0	0	0	0	0	0	0	0	0	0	0	0	0	0	0	0	0	0	0
XR_002163410	105032834	LOC105032834	protein UPSTREAM OF FLC, transcript variant X2	misc_RNA	.	.	NW_011550980.1:440198-445426	1672	0	0	0	0	0	0	0	0	0	0	0	0	0	0	0	0	0	0	0	0	0	0	0	0	0	0	0	0	0	0
XM_010907410	105032834	LOC105032834	protein UPSTREAM OF FLC, transcript variant X1	mRNA	XP_010905712.1	.	NW_011550980.1:440204-445426	1641	0	0	0	0	0	0	0	0	0	0	0	0	0	0	0	0	0	0	0	0	0	0	0	0	0	0	0	0	0	0
XM_010907413	105032836	LOC105032836	protein ALP1-like	mRNA	XP_010905715.1	.	NW_011550980.1:462143-488377	2164	0	0	0	0	0	0	0	0	0	0	0	0	0	0	0	0	0	0	0	0	0	0	0	0	0	0	0	0	0	0
XM_010907417	105032837	LOC105032837	F-box/LRR-repeat protein At4g14103-like	mRNA	XP_010905719.1	.	chr1:61511120-61520890	1518	0	0	0	0	0	0	0	0	0	0	0	0	0	0	0	0	0	0	0	0	0	0	0	0	0	0	0	0	0	0
gene-LOC105032838	105032838	LOC105032838	.	Gene	.	.	NW_011550980.1:719397-720327	931	0	0	0	0	0	0	0	0	0	0	0	0	0	0	0	0	0	0	0	0	0	0	0	0	0	0	0	0	0	0
XM_010907415	105032839	LOC105032839	type I inositol polyphosphate 5-phosphatase 8, transcript variant X1	mRNA	XP_010905717.1	.	NW_011550980.1:812401-817734	2279	0	0	0	0	0	0	0	0	0	0	0	0	0	0	0	0	0	0	0	0	0	0	0	0	0	0	0	0	0	0
XM_029261144	105032839	LOC105032839	type I inositol polyphosphate 5-phosphatase 8, transcript variant X2	mRNA	XP_029116977.1	.	NW_011550980.1:813601-817734	2013	0	0	0	0	0	0	0	0	0	0	0	0	0	0	0	0	0	0	0	0	0	0	0	0	0	0	0	0	0	0
XM_019846453	105032839	LOC105032839	type I inositol polyphosphate 5-phosphatase 8, transcript variant X3	mRNA	XP_019702012.1	.	NW_011550980.1:814527-817734	1790	0	0	0	0	0	0	0	0	0	0	0	0	0	0	0	0	0	0	0	0	0	0	0	0	0	0	0	0	0	0
XM_010907418	105032840	LOC105032840	ras-related protein RABE1c	mRNA	XP_010905720.1	.	NW_011550980.1:818774-827421	1294	0	0	0	0	0	0	0	0	0	0	0	0	0	0	0	0	0	0	0	0	0	0	0	0	0	0	0	0	0	0
XM_029261140	105032841	LOC105032841	soluble inorganic pyrophosphatase 4	mRNA	XP_029116973.1	.	NW_011550980.1:865599-871577	1051	0	0	0	0	0	0	0	0	0	0	0	0	0	0	0	0	0	0	0	0	0	0	0	0	0	0	0	0	0	0
XM_010907420	105032842	LOC105032842	40S ribosomal protein S15a	mRNA	XP_010905722.1	.	NW_011550980.1:874626-878474	750	0	0	0	0	0	0	0	0	0	0	0	0	0	0	0	0	0	0	0	0	0	0	0	0	0	0	0	0	0	0
XM_010907421	105032843	LOC105032843	uncharacterized LOC105032843	mRNA	XP_010905723.1	.	NW_011550980.1:962395-963535	1141	0	0	0	0	0	0	0	0	0	0	0	0	0	0	0	0	0	0	0	0	0	0	0	0	0	0	0	0	0	0
XM_010907422	105032844	LOC105032844	histone H2B.1	mRNA	XP_010905724.1	.	NW_011550980.1:971114-972314	1201	0	0	0	0	0	0	0	0	0	0	0	0	0	0	0	0	0	0	0	0	0	0	0	0	0	0	0	0	0	0
XM_010907423	105032845	LOC105032845	histone H2A	mRNA	XP_010905725.1	.	NW_011550980.1:979421-980205	691	0	0	0	0	0	0	0	0	0	0	0	0	0	0	0	0	0	0	0	0	0	0	0	0	0	0	0	0	0	0
XM_010907426	105032847	LOC105032847	putative F-box/LRR-repeat protein At3g18150	mRNA	XP_010905728.3	.	chr1:61603616-61605649	1832	0	0	0	0	0	0	0	0	0	0	0	0	0	0	0	0	0	0	0	0	0	0	0	0	0	0	0	0	0	0
XM_010907425	105032849	LOC105032849	probable helicase MAGATAMA 3	mRNA	XP_010905727.1	.	NW_011550981.1:1225408-1230904	1899	0	0	0	0	0	0	0	0	0	0	0	0	0	0	0	0	0	0	0	0	0	0	0	0	0	0	0	0	0	0
gene-LOC105032850	105032850	LOC105032850	.	Gene	.	.	NW_011550982.1:3323-10597	2252	0	0	0	0	0	0	0	0	0	0	0	0	0	0	0	0	0	0	0	0	0	0	0	0	0	0	0	0	0	0
XR_003798805	105032852	LOC105032852	uncharacterized LOC105032852, transcript variant X4	misc_RNA	.	.	NW_011550982.1:146808-149888	2413	0	0	0	0	0	0	0	0	0	0	0	0	0	0	0	0	0	0	0	0	0	0	0	0	0	0	0	0	0	0
XM_029261147	105032852	LOC105032852	uncharacterized LOC105032852, transcript variant X2	mRNA	XP_029116980.1	.	NW_011550982.1:146808-192401	4209	0	0	0	0	0	0	0	0	0	0	0	0	0	0	0	0	0	0	0	0	0	0	0	0	0	0	0	0	0	0
XM_029261146	105032852	LOC105032852	uncharacterized LOC105032852, transcript variant X1	mRNA	XP_029116979.1	.	NW_011550982.1:146808-193374	1498	0	0	0	0	0	0	0	0	0	0	0	0	0	0	0	0	0	0	0	0	0	0	0	0	0	0	0	0	0	0
XR_003798804	105032852	LOC105032852	uncharacterized LOC105032852, transcript variant X3	misc_RNA	.	.	NW_011550982.1:146808-213151	12082	0	0	0	0	0	0	0	0	0	0	0	0	0	0	0	0	0	0	0	0	0	0	0	0	0	0	0	0	0	0
XM_010907432	105032853	LOC105032853	uricase-2 isozyme 2	mRNA	XP_010905734.1	.	NW_011550982.1:215842-221407	1559	0	0	0	0	0	0	0	0	0	0	0	0	0	0	0	0	0	0	0	0	0	0	0	0	0	0	0	0	0	0
XM_010907434	105032854	LOC105032854	nudix hydrolase 26, chloroplastic	mRNA	XP_010905736.2	.	NW_011550982.1:222991-241508	1221	0	0	0	0	0	0	0	0	0	0	0	0	0	0	0	0	0	0	0	0	0	0	0	0	0	0	0	0	0	0
XM_010907435	105032855	LOC105032855	uncharacterized LOC105032855	mRNA	XP_010905737.1	.	NW_011550982.1:255291-257026	1736	0	0	0	0	0	0	0	0	0	0	0	0	0	0	0	0	0	0	0	0	0	0	0	0	0	0	0	0	0	0
XM_019846464	105032856	LOC105032856	probable LRR receptor-like serine/threonine-protein kinase At3g47570, transcript variant X2	mRNA	XP_019702023.1	.	NW_011550982.1:333430-334899	989	0	0	0	0	0	0	0	0	0	0	0	0	0	0	0	0	0	0	0	0	0	0	0	0	0	0	0	0	0	0
XM_010907436	105032856	LOC105032856	probable LRR receptor-like serine/threonine-protein kinase At3g47570, transcript variant X1	mRNA	XP_010905738.1	.	NW_011550982.1:333661-334899	1082	0	0	0	0	0	0	0	0	0	0	0	0	0	0	0	0	0	0	0	0	0	0	0	0	0	0	0	0	0	0
XM_010907437	105032857	LOC105032857	BI1-like protein	mRNA	XP_010905739.1	.	NW_011550982.1:556149-569711	1139	0	0	0	0	0	0	0	0	0	0	0	0	0	0	0	0	0	0	0	0	0	0	0	0	0	0	0	0	0	0
XM_010907438	105032859	LOC105032859	RNA demethylase ALKBH10B	mRNA	XP_010905740.1	.	NW_011550982.1:604766-612599	2319	0	0	0	0	0	0	0	0	0	0	0	0	0	0	0	0	0	0	0	0	0	0	0	0	0	0	0	0	0	0
XM_010907439	105032860	LOC105032860	BSD domain-containing protein C22A12.14c	mRNA	XP_010905741.2	.	NW_011550982.1:634623-637237	1703	0	0	0	0	0	0	0	0	0	0	0	0	0	0	0	0	0	0	0	0	0	0	0	0	0	0	0	0	0	0
XM_010907442	105032861	LOC105032861	uncharacterized LOC105032861, transcript variant X3	mRNA	XP_010905744.1	.	NW_011550982.1:778525-800406	1088	0	0	0	0	0	0	0	0	0	0	0	0	0	0	0	0	0	0	0	0	0	0	0	0	0	0	0	0	0	0
XM_010907440	105032861	LOC105032861	uncharacterized LOC105032861, transcript variant X1	mRNA	XP_010905742.1	.	NW_011550982.1:778525-813909	1417	0	0	0	0	0	0	0	0	0	0	0	0	0	0	0	0	0	0	0	0	0	0	0	0	0	0	0	0	0	0
XM_010907441	105032861	LOC105032861	uncharacterized LOC105032861, transcript variant X2	mRNA	XP_010905743.1	.	NW_011550982.1:778525-813909	1360	0	0	0	0	0	0	0	0	0	0	0	0	0	0	0	0	0	0	0	0	0	0	0	0	0	0	0	0	0	0
XM_010907446	105032862	LOC105032862	thioredoxin reductase NTRA-like	mRNA	XP_010905748.1	.	chr1:61760353-61761505	1080	0	0	0	0	0	0	0	0	0	0	0	0	0	0	0	0	0	0	0	0	0	0	0	0	0	0	0	0	0	0
XM_010907444	105032864	LOC105032864	calcium-binding protein 39, transcript variant X3	mRNA	XP_010905746.1	.	NW_011550982.1:816152-848946	1719	0	0	0	0	0	0	0	0	0	0	0	0	0	0	0	0	0	0	0	0	0	0	0	0	0	0	0	0	0	0
XR_002163425	105032864	LOC105032864	calcium-binding protein 39, transcript variant X1	misc_RNA	.	.	NW_011550982.1:816152-848947	2000	0	0	0	0	0	0	0	0	0	0	0	0	0	0	0	0	0	0	0	0	0	0	0	0	0	0	0	0	0	0
XM_010907443	105032864	LOC105032864	calcium-binding protein 39, transcript variant X2	mRNA	XP_010905745.1	.	NW_011550982.1:816158-848928	1798	0	0	0	0	0	0	0	0	0	0	0	0	0	0	0	0	0	0	0	0	0	0	0	0	0	0	0	0	0	0
XM_010907447	105032865	LOC105032865	probable LRR receptor-like serine/threonine-protein kinase At3g47570	mRNA	XP_010905749.1	.	NW_011550982.1:320363-321611	1095	0	0	0	0	0	0	0	0	0	0	0	0	0	0	0	0	0	0	0	0	0	0	0	0	0	0	0	0	0	0
XM_010907448	105032866	LOC105032866	probable LRR receptor-like serine/threonine-protein kinase At3g47570	mRNA	XP_010905750.2	.	NW_011550982.1:393439-396985	3393	0	0	0	0	0	0	0	0	0	0	0	0	0	0	0	0	0	0	0	0	0	0	0	0	0	0	0	0	0	0
XM_029261145	105032867	LOC105032867	probable LRR receptor-like serine/threonine-protein kinase At3g47570	mRNA	XP_029116978.1	.	NW_011550982.1:431375-511548	2881	0	0	0	0	0	0	0	0	0	0	0	0	0	0	0	0	0	0	0	0	0	0	0	0	0	0	0	0	0	0
XM_010907450	105032868	LOC105032868	DNA-directed RNA polymerase III subunit 2, transcript variant X1	mRNA	XP_010905752.1	.	NW_011550983.1:16066-79051	3990	0	0	0	0	0	0	0	0	0	0	0	0	0	0	0	0	0	0	0	0	0	0	0	0	0	0	0	0	0	0
XM_029261148	105032868	LOC105032868	DNA-directed RNA polymerase III subunit 2, transcript variant X2	mRNA	XP_029116981.1	.	NW_011550983.1:30571-79051	2824	0	0	0	0	0	0	0	0	0	0	0	0	0	0	0	0	0	0	0	0	0	0	0	0	0	0	0	0	0	0
XM_010907452	105032869	LOC105032869	protein TPX2, transcript variant X2	mRNA	XP_010905754.1	.	NW_011550983.1:531720-594508	2024	0	0	0	0	0	0	0	0	0	0	0	0	0	0	0	0	0	0	0	0	0	0	0	0	0	0	0	0	0	0
XM_029261150	105032869	LOC105032869	protein TPX2, transcript variant X1	mRNA	XP_029116983.1	.	NW_011550983.1:531720-594508	2060	0	0	0	0	0	0	0	0	0	0	0	0	0	0	0	0	0	0	0	0	0	0	0	0	0	0	0	0	0	0
XR_003798809	105032869	LOC105032869	protein TPX2, transcript variant X3	misc_RNA	.	.	NW_011550983.1:533008-594508	1548	0	0	0	0	0	0	0	0	0	0	0	0	0	0	0	0	0	0	0	0	0	0	0	0	0	0	0	0	0	0
XR_003798810	105032869	LOC105032869	protein TPX2, transcript variant X5	misc_RNA	.	.	NW_011550983.1:533008-594508	1512	0	0	0	0	0	0	0	0	0	0	0	0	0	0	0	0	0	0	0	0	0	0	0	0	0	0	0	0	0	0
XM_029261151	105032869	LOC105032869	protein TPX2, transcript variant X4	mRNA	XP_029116984.1	.	NW_011550983.1:533845-594508	1461	0	0	0	0	0	0	0	0	0	0	0	0	0	0	0	0	0	0	0	0	0	0	0	0	0	0	0	0	0	0
XM_029260956	105032870	LOC105032870	QWRF motif-containing protein 3	mRNA	XP_029116789.1	.	chr1:61786929-61790452	2184	0	0	0	0	0	0	0	0	0	0	0	0	0	0	0	0	0	0	0	0	0	0	0	0	0	0	0	0	0	0
XM_029261149	105032871	LOC105032871	ABC transporter G family member 45	mRNA	XP_029116982.1	.	NW_011550983.1:354597-400312	4172	0	0	0	0	0	0	0	0	0	0	0	0	0	0	0	0	0	0	0	0	0	0	0	0	0	0	0	0	0	0
gene-LOC105032872	105032872	LOC105032872	.	Gene	.	.	NW_011550983.1:715691-744464	1158	0	0	0	0	0	0	0	0	0	0	0	0	0	0	0	0	0	0	0	0	0	0	0	0	0	0	0	0	0	0
XM_010907454	105032873	LOC105032873	cytochrome P450 71A1	mRNA	XP_010905756.1	.	NW_011550984.1:10330-12218	1809	0	0	0	0	0	0	0	0	0	0	0	0	0	0	0	0	0	0	0	0	0	0	0	0	0	0	0	0	0	0
XM_010907456	105032874	LOC105032874	DNA replication licensing factor MCM3	mRNA	XP_010905758.1	.	NW_011550984.1:25567-32453	2646	0	0	0	0	0	0	0	0	0	0	0	0	0	0	0	0	0	0	0	0	0	0	0	0	0	0	0	0	0	0
XM_029261153	105032875	LOC105032875	uncharacterized LOC105032875, transcript variant X1	mRNA	XP_029116986.1	.	NW_011550984.1:70553-72415	1392	0	0	0	0	0	0	0	0	0	0	0	0	0	0	0	0	0	0	0	0	0	0	0	0	0	0	0	0	0	0
XM_029261154	105032875	LOC105032875	uncharacterized LOC105032875, transcript variant X2	mRNA	XP_029116987.1	.	NW_011550984.1:70553-72415	1323	0	0	0	0	0	0	0	0	0	0	0	0	0	0	0	0	0	0	0	0	0	0	0	0	0	0	0	0	0	0
XM_029261155	105032875	LOC105032875	uncharacterized LOC105032875, transcript variant X3	mRNA	XP_029116988.1	.	NW_011550984.1:70553-72415	1299	0	0	0	0	0	0	0	0	0	0	0	0	0	0	0	0	0	0	0	0	0	0	0	0	0	0	0	0	0	0
XM_010907458	105032876	LOC105032876	protein NSP-INTERACTING KINASE 1	mRNA	XP_010905760.1	.	NW_011550984.1:101324-106007	2531	0	0	0	0	0	0	0	0	0	0	0	0	0	0	0	0	0	0	0	0	0	0	0	0	0	0	0	0	0	0
XM_010907459	105032877	LOC105032877	peroxidase 11	mRNA	XP_010905761.2	.	NW_011550984.1:108889-111383	1148	0	0	0	0	0	0	0	0	0	0	0	0	0	0	0	0	0	0	0	0	0	0	0	0	0	0	0	0	0	0
XM_010907460	105032878	LOC105032878	agmatine deiminase	mRNA	XP_010905762.1	.	NW_011550984.1:125460-142944	1553	0	0	0	0	0	0	0	0	0	0	0	0	0	0	0	0	0	0	0	0	0	0	0	0	0	0	0	0	0	0
XM_029261156	105032879	LOC105032879	probable serine/threonine-protein kinase DDB_G0291350, transcript variant X2	mRNA	XP_029116989.1	.	NW_011550984.1:159105-169013	1359	0	0	0	0	0	0	0	0	0	0	0	0	0	0	0	0	0	0	0	0	0	0	0	0	0	0	0	0	0	0
XM_010907461	105032879	LOC105032879	probable serine/threonine-protein kinase DDB_G0291350, transcript variant X1	mRNA	XP_010905763.1	.	NW_011550984.1:159214-169013	1327	0	0	0	0	0	0	0	0	0	0	0	0	0	0	0	0	0	0	0	0	0	0	0	0	0	0	0	0	0	0
XM_010907464	105032879	LOC105032879	probable serine/threonine-protein kinase DDB_G0291350, transcript variant X3	mRNA	XP_010905766.1	.	NW_011550984.1:159220-169013	1318	0	0	0	0	0	0	0	0	0	0	0	0	0	0	0	0	0	0	0	0	0	0	0	0	0	0	0	0	0	0
XM_010907466	105032880	LOC105032880	ASC1-like protein 1, transcript variant X2	mRNA	XP_010905768.1	.	NW_011550984.1:206805-224122	1448	0	0	0	0	0	0	0	0	0	0	0	0	0	0	0	0	0	0	0	0	0	0	0	0	0	0	0	0	0	0
XM_010907468	105032880	LOC105032880	ASC1-like protein 1, transcript variant X3	mRNA	XP_010905770.1	.	NW_011550984.1:206814-219455	2180	0	0	0	0	0	0	0	0	0	0	0	0	0	0	0	0	0	0	0	0	0	0	0	0	0	0	0	0	0	0
XM_029261157	105032880	LOC105032880	ASC1-like protein 1, transcript variant X4	mRNA	XP_029116990.1	.	NW_011550984.1:206814-224117	1687	0	0	0	0	0	0	0	0	0	0	0	0	0	0	0	0	0	0	0	0	0	0	0	0	0	0	0	0	0	0
XM_010907465	105032880	LOC105032880	ASC1-like protein 1, transcript variant X1	mRNA	XP_010905767.1	.	NW_011550984.1:206814-224122	1542	0	0	0	0	0	0	0	0	0	0	0	0	0	0	0	0	0	0	0	0	0	0	0	0	0	0	0	0	0	0
XM_010907472	105032881	LOC105032881	prostatic spermine-binding protein, transcript variant X3	mRNA	XP_010905774.1	.	NW_011550984.1:274712-275949	1023	0	0	0	0	0	0	0	0	0	0	0	0	0	0	0	0	0	0	0	0	0	0	0	0	0	0	0	0	0	0
XM_010907470	105032881	LOC105032881	prostatic spermine-binding protein, transcript variant X1	mRNA	XP_010905772.1	.	NW_011550984.1:274713-275949	1141	0	0	0	0	0	0	0	0	0	0	0	0	0	0	0	0	0	0	0	0	0	0	0	0	0	0	0	0	0	0
XM_010907471	105032881	LOC105032881	prostatic spermine-binding protein, transcript variant X2	mRNA	XP_010905773.1	.	NW_011550984.1:274713-275949	1145	0	0	0	0	0	0	0	0	0	0	0	0	0	0	0	0	0	0	0	0	0	0	0	0	0	0	0	0	0	0
XM_010907474	105032882	LOC105032882	eukaryotic translation initiation factor 5	mRNA	XP_010905776.1	.	NW_011550984.1:360849-366659	2113	0	0	0	0	0	0	0	0	0	0	0	0	0	0	0	0	0	0	0	0	0	0	0	0	0	0	0	0	0	0
XM_010907476	105032884	LOC105032884	serine protease SPPA, chloroplastic, transcript variant X1	mRNA	XP_010905778.1	.	NW_011550984.1:410928-450516	2669	0	0	0	0	0	0	0	0	0	0	0	0	0	0	0	0	0	0	0	0	0	0	0	0	0	0	0	0	0	0
XM_010907477	105032884	LOC105032884	serine protease SPPA, chloroplastic, transcript variant X2	mRNA	XP_010905779.1	.	NW_011550984.1:410928-450516	2531	0	0	0	0	0	0	0	0	0	0	0	0	0	0	0	0	0	0	0	0	0	0	0	0	0	0	0	0	0	0
XM_010907479	105032885	LOC105032885	pentatricopeptide repeat-containing protein At2g01510, mitochondrial	mRNA	XP_010905781.1	.	chr1:61961251-61963806	2556	9	13	3	1	1	2	0	2	1	1	0.167223	0.25996	0.22409	0.057361	0.011058	0.032213	0	0.093906	0.05877	0.006034	0.23121	0.363852	0.419965	0.099059	0.019698	0.039573	0	0.184959	0.110838	0.007598
XR_003798812	105032886	LOC105032886	uncharacterized LOC105032886, transcript variant X2	misc_RNA	.	.	NW_011550984.1:465751-468663	889	0	0	0	0	0	0	0	0	0	0	0	0	0	0	0	0	0	0	0	0	0	0	0	0	0	0	0	0	0	0
XM_019846474	105032886	LOC105032886	uncharacterized LOC105032886, transcript variant X1	mRNA	XP_019702033.1	.	NW_011550984.1:465751-468668	851	0	0	0	0	0	0	0	0	0	0	0	0	0	0	0	0	0	0	0	0	0	0	0	0	0	0	0	0	0	0
XR_003798813	105032887	LOC105032887	chaperonin 60 subunit beta 4, chloroplastic, transcript variant X2	misc_RNA	.	.	NW_011550984.1:473451-494135	2351	0	0	0	0	0	0	0	0	0	0	0	0	0	0	0	0	0	0	0	0	0	0	0	0	0	0	0	0	0	0
XM_010907478	105032887	LOC105032887	chaperonin 60 subunit beta 4, chloroplastic, transcript variant X1	mRNA	XP_010905780.1	.	NW_011550984.1:474530-494135	2532	0	0	0	0	0	0	0	0	0	0	0	0	0	0	0	0	0	0	0	0	0	0	0	0	0	0	0	0	0	0
XM_029261158	105032887	LOC105032887	chaperonin 60 subunit beta 4, chloroplastic, transcript variant X3	mRNA	XP_029116991.1	.	NW_011550984.1:482404-494135	1635	0	0	0	0	0	0	0	0	0	0	0	0	0	0	0	0	0	0	0	0	0	0	0	0	0	0	0	0	0	0
gene-LOC105032888	105032888	LOC105032888	.	Gene	.	.	NW_011550984.1:554785-571659	1715	0	0	0	0	0	0	0	0	0	0	0	0	0	0	0	0	0	0	0	0	0	0	0	0	0	0	0	0	0	0
XM_019846475	105032889	LOC105032889	uncharacterized LOC105032889, transcript variant X1	mRNA	XP_019702034.1	.	NW_011550984.1:635051-636693	1399	0	0	0	0	0	0	0	0	0	0	0	0	0	0	0	0	0	0	0	0	0	0	0	0	0	0	0	0	0	0
XR_003798811	105032889	LOC105032889	uncharacterized LOC105032889, transcript variant X2	misc_RNA	.	.	NW_011550984.1:635055-640928	672	0	0	0	0	0	0	0	0	0	0	0	0	0	0	0	0	0	0	0	0	0	0	0	0	0	0	0	0	0	0
XM_010907481	105032890	LOC105032890	pentatricopeptide repeat-containing protein At1g76280, transcript variant X1	mRNA	XP_010905783.2	.	NW_011550984.1:703785-727030	3696	0	0	0	0	0	0	0	0	0	0	0	0	0	0	0	0	0	0	0	0	0	0	0	0	0	0	0	0	0	0
XM_019846477	105032890	LOC105032890	pentatricopeptide repeat-containing protein At1g76280, transcript variant X3	mRNA	XP_019702036.1	.	NW_011550984.1:704432-726847	3057	0	0	0	0	0	0	0	0	0	0	0	0	0	0	0	0	0	0	0	0	0	0	0	0	0	0	0	0	0	0
XM_010907480	105032890	LOC105032890	pentatricopeptide repeat-containing protein At1g76280, transcript variant X4	mRNA	XP_010905782.1	.	NW_011550984.1:704432-726987	3107	0	0	0	0	0	0	0	0	0	0	0	0	0	0	0	0	0	0	0	0	0	0	0	0	0	0	0	0	0	0
XM_019846476	105032890	LOC105032890	pentatricopeptide repeat-containing protein At1g76280, transcript variant X2	mRNA	XP_019702035.1	.	NW_011550984.1:704432-727030	2869	0	0	0	0	0	0	0	0	0	0	0	0	0	0	0	0	0	0	0	0	0	0	0	0	0	0	0	0	0	0
XM_010907483	105032891	LOC105032891	disease resistance protein RPM1-like	mRNA	XP_010905785.1	.	NW_011550984.1:508942-511746	2805	0	0	0	0	0	0	0	0	0	0	0	0	0	0	0	0	0	0	0	0	0	0	0	0	0	0	0	0	0	0
gene-LOC105032892	105032892	LOC105032892	.	Gene	.	.	NW_011550984.1:521918-532698	1134	0	0	0	0	0	0	0	0	0	0	0	0	0	0	0	0	0	0	0	0	0	0	0	0	0	0	0	0	0	0
XM_010907484	105032893	LOC105032893	disease resistance protein RPM1-like	mRNA	XP_010905786.1	.	NW_011550984.1:615466-618411	2946	0	0	0	0	0	0	0	0	0	0	0	0	0	0	0	0	0	0	0	0	0	0	0	0	0	0	0	0	0	0
XM_010907487	105032894	LOC105032894	uncharacterized LOC105032894	mRNA	XP_010905789.1	.	chr1:61968108-61969314	1123	0	0	0	0	0	0	0	0	0	0	0	0	0	0	0	0	0	0	0	0	0	0	0	0	0	0	0	0	0	0
gene-LOC105032896	105032896	LOC105032896	.	Gene	.	.	NW_011550985.1:162037-170687	923	0	0	0	0	0	0	0	0	0	0	0	0	0	0	0	0	0	0	0	0	0	0	0	0	0	0	0	0	0	0
XM_010907489	105032898	LOC105032898	cinnamoyl-CoA reductase 2, transcript variant X3	mRNA	XP_010905791.1	.	NW_011550985.1:209616-220423	1493	0	0	0	0	0	0	0	0	0	0	0	0	0	0	0	0	0	0	0	0	0	0	0	0	0	0	0	0	0	0
XM_010907486	105032898	LOC105032898	cinnamoyl-CoA reductase 2, transcript variant X1	mRNA	XP_010905788.1	.	NW_011550985.1:209621-220423	1671	0	0	0	0	0	0	0	0	0	0	0	0	0	0	0	0	0	0	0	0	0	0	0	0	0	0	0	0	0	0
XM_010907488	105032898	LOC105032898	cinnamoyl-CoA reductase 2, transcript variant X2	mRNA	XP_010905790.1	.	NW_011550985.1:209622-220445	1689	0	0	0	0	0	0	0	0	0	0	0	0	0	0	0	0	0	0	0	0	0	0	0	0	0	0	0	0	0	0
XM_019846481	105032899	LOC105032899	cinnamoyl-CoA reductase 2	mRNA	XP_019702040.2	.	NW_011550985.1:323226-334683	1345	0	0	0	0	0	0	0	0	0	0	0	0	0	0	0	0	0	0	0	0	0	0	0	0	0	0	0	0	0	0
XM_029261159	105032900	LOC105032900	cinnamoyl-CoA reductase 2	mRNA	XP_029116992.1	.	NW_011550985.1:297919-308779	1538	0	0	0	0	0	0	0	0	0	0	0	0	0	0	0	0	0	0	0	0	0	0	0	0	0	0	0	0	0	0
XM_010907491	105032901	LOC105032901	cinnamoyl-CoA reductase 2	mRNA	XP_010905793.1	.	NW_011550985.1:393898-428553	1517	0	0	0	0	0	0	0	0	0	0	0	0	0	0	0	0	0	0	0	0	0	0	0	0	0	0	0	0	0	0
XM_010907492	105032902	LOC105032902	cinnamoyl-CoA reductase 1	mRNA	XP_010905794.1	.	NW_011550985.1:561650-573537	1322	0	0	0	0	0	0	0	0	0	0	0	0	0	0	0	0	0	0	0	0	0	0	0	0	0	0	0	0	0	0
XM_019846480	105032903	LOC105032903	cinnamoyl-CoA reductase 1, transcript variant X1	mRNA	XP_019702039.1	.	NW_011550985.1:765213-776472	1219	0	0	0	0	0	0	0	0	0	0	0	0	0	0	0	0	0	0	0	0	0	0	0	0	0	0	0	0	0	0
XM_010907493	105032903	LOC105032903	cinnamoyl-CoA reductase 1, transcript variant X2	mRNA	XP_010905795.1	.	NW_011550985.1:765214-776516	1259	0	0	0	0	0	0	0	0	0	0	0	0	0	0	0	0	0	0	0	0	0	0	0	0	0	0	0	0	0	0
gene-LOC105032904	105032904	LOC105032904	.	Gene	.	.	chr1:61972807-61974126	1131	0	0	0	8	0	0	0	3	7	0	0	0	0	1.38302	0	0	0	0.528783	1.26209	0	0	0	0	2.38838	0	0	0	1.0415	2.38026	0
XM_010907494	105032905	LOC105032905	long chain acyl-CoA synthetase 6, peroxisomal	mRNA	XP_010905796.1	.	NW_011550985.1:839428-896957	2619	0	0	0	0	0	0	0	0	0	0	0	0	0	0	0	0	0	0	0	0	0	0	0	0	0	0	0	0	0	0
gene-LOC105032906	105032906	LOC105032906	.	Gene	.	.	NW_011550985.1:238718-247415	888	0	0	0	0	0	0	0	0	0	0	0	0	0	0	0	0	0	0	0	0	0	0	0	0	0	0	0	0	0	0
gene-LOC105032907	105032907	LOC105032907	.	Gene	.	.	NW_011550985.1:551959-552549	591	0	0	0	0	0	0	0	0	0	0	0	0	0	0	0	0	0	0	0	0	0	0	0	0	0	0	0	0	0	0
gene-LOC105032908	105032908	LOC105032908	.	Gene	.	.	NW_011550985.1:573771-595210	1006	0	0	0	0	0	0	0	0	0	0	0	0	0	0	0	0	0	0	0	0	0	0	0	0	0	0	0	0	0	0
gene-LOC105032909	105032909	LOC105032909	.	Gene	.	.	NW_011550985.1:733308-756639	1193	0	0	0	0	0	0	0	0	0	0	0	0	0	0	0	0	0	0	0	0	0	0	0	0	0	0	0	0	0	0
XR_829891	105032910	LOC105032910	uncharacterized LOC105032910	ncRNA	.	.	NW_011550986.1:16279-17479	784	0	0	0	0	0	0	0	0	0	0	0	0	0	0	0	0	0	0	0	0	0	0	0	0	0	0	0	0	0	0
gene-LOC105032911	105032911	LOC105032911	.	Gene	.	.	chr1:5033259-5050395	2441	0	0	0	0	0	0	0	0	0	0	0	0	0	0	0	0	0	0	0	0	0	0	0	0	0	0	0	0	0	0
XM_010907495	105032912	LOC105032912	protein LIGHT-DEPENDENT SHORT HYPOCOTYLS 4, transcript variant X1	mRNA	XP_010905797.1	.	NW_011550986.1:31552-33357	1489	0	0	0	0	0	0	0	0	0	0	0	0	0	0	0	0	0	0	0	0	0	0	0	0	0	0	0	0	0	0
XM_010907496	105032912	LOC105032912	protein LIGHT-DEPENDENT SHORT HYPOCOTYLS 4, transcript variant X3	mRNA	XP_010905798.1	.	NW_011550986.1:31552-33357	1492	0	0	0	0	0	0	0	0	0	0	0	0	0	0	0	0	0	0	0	0	0	0	0	0	0	0	0	0	0	0
[truncated: 52,670 more rows]

## Sheet: ANCOVA
Coefficients	Error	T-value	P-valor	Adjusted R-squared
[truncated: 4 more rows]

[truncated: 2 more sheets: Trimming and Mapping data, Resume number genes]
