# Supplementary material for: Conserved stress-responsive genes involved in the early development of Euterpe edulis
Source: Research Square preprint supplement (doi:10.21203/rs.3.rs-5678569/v1), 2025-05-05
Supplement: Supplementary file 2 [file 5f7cddc66f646cc04d641533.xlsx]

## Sheet: 4239after_filter_cpm
Table 1. Expression profile of mapped genes after normalization with the Counts Per Million (CPM) method for leaf tissue.
Gene_ID	Transcript_ID	Gene_Symbol	Description	gene_biotype	Protein_ID	locus_tag	UFES_250LP1	UFES_250LP3	SMLP1	SMLP3	UFES_250LP1_CPM	UFES_250LP3_CPM	SMLP1_CPM	SMLP3_CPM	logFC	negLog10PValue	logCPM	AdjPValue	status
12079377	rna-ElguCp010	trnR-UCU	tRNA-Arg	tRNA	.	ElguCp010	105	97	281	114	731238254485537	698399793273661	2045945678322	709422525086176	-1136	1227	3.22	0.1601	nonDE
12079378	gene-ElguCp012	atpF	ATP synthase CF0 subunit I	protein_coding	YP_006073090.1	ElguCp012	39161	46471	112305	98082	272724012227696	334591100961034	817686581508728	610364737767564	-1639	2.86	12.17	0.01885	downReg
12079379	gene-ElguCp014	atpI	ATP synthase CF0 subunit IV	protein_coding	YP_006073092.1	ElguCp014	14022	19012	46190	22515	976516457561543	136886359481638	336306871465101	14011094870452	-1326	1806	10.63	0.07188	nonDE
12079380	gene-ElguCp015	rps2	ribosomal protein S2	protein_coding	YP_006073093.1	ElguCp015	4910	6626	10594	8731	341940936145142	47707185878673	771343363563819	543330532151527	-1094	2061	8998	0.05267	nonDE
12079381	rna-ElguCp019	trnC-GCA	tRNA-Cys	tRNA	.	ElguCp019	181	161	65	62	126051546725602	11591996568769	47326145583961	385826285573184	1101	1573	2853	0.09845	nonDE
12079382	gene-ElguCp020	petN	cytochrome b6/f complex subunit VIII	protein_coding	YP_006073097.1	ElguCp020	4527	4016	5883	4618	31526815029105	289151914411033	428338022262219	287378352705962	-0.6346	1234	8347	0.1582	nonDE
12079383	gene-ElguCp021	psbM	photosystem II protein M	protein_coding	YP_006073098.1	ElguCp021	1203	1337	7145	1058	837790114424858	962639715058644	520223554149848	65839388731682	-1498	1219	7011	0.161	nonDE
12079384	rna-ElguCp022	trnD-GUC	tRNA-Asp	tRNA	.	ElguCp022	130	68	121	86	905342600791618	489599855078443	880994402409119	535178396117642	-0.4137	0.4237	2765	0.5257	nonDE
12079385	rna-ElguCp023	trnY-GUA	tRNA-Tyr	tRNA	.	ElguCp023	862	618	1122	835	600311786063365	444959868291879	816922082233911	519620884602594	-0.7473	1711	5.86	0.08125	nonDE
12079386	rna-ElguCp024	trnE-UUC	tRNA-Glu	tRNA	.	ElguCp024	558	391	634	471	388600900955171	281519916670105	461611943080481	293103516943499	-0.5573	1142	5126	0.1814	nonDE
12079388	gene-ElguCp026	psbD	photosystem II protein D2	protein_coding	YP_006073099.1	ElguCp026	321659	368063	334047	222955	22400891971387	265005281558437	243217799290545	138744999193499	-0.006732	0.005623	14.37	0.993	nonDE
12079389	rna-ElguCp028	trnS-UGA	tRNA-Ser	tRNA	.	ElguCp028	133	148	195	187	926235122348347	106559968458249	141978436751883	116370186132557	-0.7817	1605	3503	0.09449	nonDE
12079390	gene-ElguCp029	psbZ	photosystem II protein Z	protein_coding	YP_006073101.1	ElguCp029	9498	18478	52474	11992	66145723248606	133041560619698	38206033282658	746262712353809	-1268	1025	10.3	0.2164	nonDE
12079391	gene-ElguCp034	psaA	photosystem I P700 apoprotein A1	protein_coding	YP_006073104.1	ElguCp034	492705	585195	512054	513831	343128327786949	421340275283279	372823725397685	319757267971539	-0.2735	0.3162	15.15	0.6255	nonDE
12079392	gene-ElguCp035	ycf3	photosystem I assembly protein ycf3	protein_coding	YP_006073105.1	ElguCp035	11216	12856	23483	20017	781101739267599	925631726013009	170978442576639	124565883198684	-1193	2267	10.12	0.04058	downReg
12079393	gene-ElguCp037	rps4	ribosomal protein S4	protein_coding	YP_006073106.1	ElguCp037	1592	2032	2292	2014	110869647727712	146303956694029	166879270274521	125331312765224	-0.5988	1.35	7085	0.1336	nonDE
12079395	gene-ElguCp041	ndhJ	NADH dehydrogenase subunit J	protein_coding	YP_006073107.1	ElguCp041	8391	10091	14025	12322	584363827941728	726551784940672	102115260279239	766798627553672	-0.8552	1609	9569	0.09407	nonDE
12079396	gene-ElguCp042	ndhK	NADH dehydrogenase subunit K	protein_coding	YP_006073108.1	ElguCp042	14439	20322	21144	22757	10055570625254	146318356689766	153948311111888	141616915819176	-0.6953	1156	10.39	0.178	nonDE
12079397	gene-ElguCp043	ndhC	NADH dehydrogenase subunit 3	protein_coding	YP_006073109.1	ElguCp043	6109	8022	10550	9232	425441380633538	577583829035187	768139747555059	574507785227682	-0.8359	1552	9165	0.1005	nonDE
12079399	gene-ElguCp049	accD	acetyl-CoA carboxylase carboxyltransferase beta subunit	protein_coding	YP_006073113.1	ElguCp049	15601	18028	34012	23270	108648076268846	129801561578738	247639517477182	144809317182064	-1088	1818	10.55	0.07072	nonDE
12079400	gene-ElguCp050	psaI	photosystem I subunit VIII	protein_coding	YP_006073114.1	ElguCp050	4916	6431	13557	6154	342358786576276	463031862942569	987077777971936	382963703454415	-1047	1404	8951	0.1252	nonDE
12079401	gene-ElguCp051	ycf4	photosystem I assembly protein Ycf4	protein_coding	YP_006073115.1	ElguCp051	14316	18282	35869	25088	996991128687138	131630361037413	261160233223245	156122739555807	-1232	2056	10.57	0.05303	nonDE
12079402	gene-ElguCp054	psbJ	photosystem II protein J	protein_coding	YP_006073118.1	ElguCp054	23044	21888	53863	43187	160482422251093	157593553352308	392173566090598	268752899920146	-1444	2628	11.15	0.02514	downReg
12079403	gene-ElguCp055	psbL	photosystem II protein L	protein_coding	YP_006073119.1	ElguCp055	12432	16256	49922	25264	865786093310876	117043165355223	363479359975769	157217988366466	-1664	2396	10.6	0.03435	downReg
12079404	gene-ElguCp056	psbF	photosystem II cytochrome b559 beta subunit	protein_coding	YP_006073120.1	ElguCp056	30504	32539	60036	62076	212435159188827	234280730652904	437118842504412	386299233923241	-1294	2429	11.56	0.03301	downReg
12079405	gene-ElguCp057	psbE	photosystem II cytochrome b559 alpha subunit	protein_coding	YP_006073121.1	ElguCp057	65403	68628	122996	126864	455477862458263	49412145374005	895527169576132	789475256338006	-1238	2227	12.62	0.04243	downReg
12079406	gene-ElguCp058	petL	cytochrome b6/f complex subunit VI	protein_coding	YP_006073122.1	ElguCp058	2644	3450	17703	3399	184132756653311	248399926473622	128894577734286	211519926558589	-1716	1.57	8385	0.09863	nonDE
12079407	gene-ElguCp059	petG	cytochrome b6/f complex subunit V	protein_coding	YP_006073123.1	ElguCp059	8497	13130	35833	12432	591745852225106	945359720173523	260898119186165	773643932620293	-1344	1481	10.01	0.1114	nonDE
12079408	rna-ElguCp060	trnW-CCA	tRNA-Trp	tRNA	.	ElguCp060	233	314	614	319	162265250757267	22607993308034	44705005213157	198513846932009	-1038	1595	4.58	0.09593	nonDE
12079410	gene-ElguCp062	psaJ	photosystem I subunit IX	protein_coding	YP_006073124.1	ElguCp062	4477	5345	19792	11144	311786063364929	384839886087394	144104472830424	693491633294767	-1946	3185	9201	0.01337	downReg
12079411	gene-ElguCp063	rpl33	50S ribosomal protein L33	protein_coding	YP_006073125.1	ElguCp063	874	1268	2311	2225	608668794686057	91295972976392	168262649914667	138461852483925	-1448	3293	6738	0.01201	downReg
12079412	gene-ElguCp064	rps18	ribosomal protein S18	protein_coding	YP_006073126.1	ElguCp064	2748	4186	7769	4248	191375497459643	301391910787994	56565665391045	264353235663691	-1105	1666	8252	0.08679	nonDE
12079413	gene-ElguCp065	rpl20	ribosomal protein L20	protein_coding	YP_006073127.1	ElguCp065	425	881	2024	1002	295977388720337	634319812241336	14736633640298	623545061523113	-1575	2172	6011	0.04558	downReg
12079414	gene-ElguCp127	rps12	ribosomal protein S12	protein_coding	YP_006073128.1	ElguCp127	4298	6148	7144	6564	299320192169413	442655868973863	520150744695103	408478022339093	-0.7531	1378	8678	0.129	nonDE
12079415	gene-ElguCp066	clpP	clp protease proteolytic subunit	protein_coding	YP_006073129.1	ElguCp066	13456	14737	33350	26624	937099233557847	106106368592515	242819531573092	165681274630652	-1423	2636	10.47	0.02492	downReg
12079416	gene-ElguCp069	psbN	photosystem II protein N	protein_coding	YP_006073132.1	ElguCp069	4306	3605	5384	3497	299877326077593	259559923170263	392006104344686	217618471072488	-0.4888	0.7816	8157	0.3072	nonDE
12079417	gene-ElguCp070	psbH	photosystem II phosphoprotein	protein_coding	YP_006073133.1	ElguCp070	12913	20236	26094	29667	899283769540166	14569915687305	189988991210443	184617877646768	-1121	1906	10.52	0.06298	nonDE
12079418	gene-ElguCp071	petB	cytochrome b6	protein_coding	YP_006073134.1	ElguCp071	152024	0	0	218177	105872156571342	0	0	135771647592743	-0.7708	0.04315	4381	0.9463	nonDE
12079419	gene-ElguCp072	petD	cytochrome b6/f complex subunit IV	protein_coding	YP_006073135.1	ElguCp072	76003	90539	140536	114774	529298105292041	65188060704334	102323495319808	714239130651235	-0.9547	1528	12.79	0.1036	nonDE
12079420	gene-ElguCp074	rps11	ribosomal protein S11	protein_coding	YP_006073137.1	ElguCp074	8873	9988	13436	14571	61793114590954	719135787135807	978267833947845	906754001143041	-0.9108	1841	9.63	0.0688	nonDE
12079421	gene-ElguCp075	rpl36	ribosomal protein L36	protein_coding	YP_006073138.1	ElguCp075	1190	1651	3600	1845	828736688416942	118871964813898	262114037080399	114814434981052	-1232	2.05	7036	0.05334	nonDE
12079422	gene-ElguCp076	infA	translational initiation factor 1	protein_coding	YP_006073139.1	ElguCp076	4283	5273	7375	6415	298275566091577	379655887621857	536969728741095	399205745476125	-0.874	1755	8625	0.07635	nonDE
12079423	gene-ElguCp077	rps8	ribosomal protein S8	protein_coding	YP_006073140.1	ElguCp077	4578	8063	12900	8150	318819878955694	580535828161395	939241966204764	507174875390556	-1097	1584	9.09	0.0971	nonDE
12079424	gene-ElguCp078	rpl14	ribosomal protein L14	protein_coding	YP_006073141.1	ElguCp078	4327	6049	7675	6792	301339802586564	43552787108375	558812565164462	422666472840817	-0.8368	1561	8713	0.09901	nonDE
12079425	gene-ElguCp079	rpl16	50S ribosomal protein L16	protein_coding	YP_006073142.1	ElguCp079	6848	9629	10089	13163	476906625401615	693287794786813	734574588917819	819134096290293	-0.8415	1533	9383	0.103	nonDE
12079426	gene-ElguCp080	rps3	ribosomal protein S3	protein_coding	YP_006073143.1	ElguCp080	7425	10072	23379	18417	517089908529058	7251837853456	170221224247296	114609075829054	-1603	2861	9853	0.01885	downReg
12079427	gene-ElguCp081	rpl22	50S ribosomal protein L22	protein_coding	YP_006073144.1	ElguCp081	1403	2375	5710	4029	977073591469723	170999949384015	415741986591411	250724855576509	-1735	2948	7675	0.01771	downReg
12079428	gene-ElguCp082	rps19	ribosomal protein S19	protein_coding	YP_006073145.1	ElguCp082	742	1048	3349	2751	516741699836446	754559776650306	243838863939516	171194856711585	-2129	4291	6.82	0.00413	downReg
12079429	rna-ElguCp083	trnH-GUG	tRNA-His	tRNA	.	ElguCp083	154	164	326	390	107248277324545	11807996504833	23735882246725	242697179634744	-1506	3592	4042	0.008614	downReg
12079430	gene-ElguCp084	rpl2	ribosomal protein L2	protein_coding	YP_006073146.1	ElguCp084	4099	5628	8807	12032	285461486203449	4052158800561	641232867935299	748751914196217	-1435	2821	8923	0.02005	downReg
12079431	gene-ElguCp085	rpl23	ribosomal protein L23	protein_coding	YP_006073147.1	ElguCp085	2120	2752	3705	4041	147640485667556	198143941349393	269759029828577	251471616129231	-1017	2351	7722	0.03612	downReg
12079433	gene-ElguCp087	ycf2	hypothetical protein RF2	protein_coding	YP_006073148.1	ElguCp087	5396	7801	5811	4467	375786821067044	561671833745137	423095741520611	277981615750873	0.005818	0.005892	8633	0.993	nonDE
12079436	gene-ElguCp090	ndhB	NADH dehydrogenase subunit 2	protein_coding	YP_006073149.1	ElguCp090	12052	19095	27217	18722	839322232672352	137483959304748	198165492978256	116507092233889	-0.9144	1332	10.32	0.138	nonDE
12079437	rna-ElguCp093	trnV-GAC	tRNA-Val	tRNA	.	ElguCp093	161	173	177	56	112123199021116	124559963130251	128872734897863	348488257937069	0.4769	0.429	3.16	0.5214	nonDE
12079438	rna-ElguCp094	rrn16	16S ribosomal RNA	rRNA	.	ElguCp094	153	958	3937	43	106551859939321	6897597958311	286650823329314	267589198058821	-0.3742	0.07708	4782	0.9	nonDE
12079440	rna-ElguCp097	trnA-UGC	tRNA-Ala	tRNA	.	ElguCp097	3864	3741	3974	1789	269095677650678	269351920271832	289344773154863	111329552401682	0.1524	0.142	7.78	0.817	nonDE
12079442	rna-ElguCp009	trnG-UCC	tRNA-Gly	tRNA	.	ElguCp009	471	668	1120	680	328012588440655	480959857635882	815465893139019	423164313209298	-0.9776	1805	5595	0.07188	nonDE
12079443	gene-ElguCp104	ndhF	NADH dehydrogenase subunit 5	protein_coding	YP_006073151.1	ElguCp104	4050	5898	20000	6343	28204904101585	424655874301861	145618909489111	394725182159791	-1553	1752	9001	0.07647	nonDE
12079444	gene-ElguCp111	ndhG	NADH dehydrogenase subunit 6	protein_coding	YP_006073157.1	ElguCp111	7197	10224	43435	19505	501211592145944	736127782106176	316247866682976	121379704840402	-2106	2856	10.09	0.01885	downReg
12079445	gene-ElguCp112	ndhI	NADH dehydrogenase subunit I	protein_coding	YP_006073158.1	ElguCp112	4356	7914	38555	15730	303359413003714	569807831336882	280716852767633	978878624526803	-2411	2929	9697	0.01795	downReg
12079446	gene-ElguCp113	ndhA	NADH dehydrogenase subunit 1	protein_coding	YP_006073159.1	ElguCp113	20668	23158	95780	60549	143935545178163	166737550645685	697368957543351	37679670588985	-2141	3402	11.46	0.01031	downReg
12079447	gene-ElguCp115	rps15	ribosomal protein S15	protein_coding	YP_006073161.1	ElguCp115	476	639	1852	763	331494675366777	46007986381636	134843110186916	474815251439257	-1461	2101	5806	0.04965	downReg
12079448	gene-ElguCp116	ycf1	hypothetical protein RF1	protein_coding	YP_006073162.1	ElguCp116	6928	8674	15196	5010	48247796448341	624527815139767	110641247429826	311772530761556	-0.5212	0.4626	9149	0.4946	nonDE
12079453	rna-ElguCp121	rrn23	23S ribosomal RNA	rRNA	.	ElguCp121	311	2689	9095	129	216585806804764	193607942692049	662201990901731	802767594176463	-0.6243	0.1397	6105	0.8193	nonDE
12079454	rna-ElguCp122	trnA-UGC	tRNA-Ala	tRNA	.	ElguCp122	4027	3935	4025	1872	280447281029834	283319916137305	293058055346835	116494646224677	0.1777	0.1727	7834	0.7807	nonDE
12079455	rna-ElguCp123	trnI-GAU	tRNA-Ile	tRNA	.	ElguCp123	4922	4241	4763	2614	342776637007411	305351909615835	346791432948317	162669340401339	0.01896	0.01788	8115	0.9787	nonDE
12079457	gene-ElguCp011	atpA	ATP synthase CF1 alpha subunit	protein_coding	YP_006073089.1	ElguCp011	88967	99779	150725	148995	619581655112522	718408587351058	109742050663731	927196571273814	-1009	1722	13	0.07984	nonDE
12079458	gene-ElguCp013	atpH	ATP synthase CF0 subunit III	protein_coding	YP_006073091.1	ElguCp013	13342	13643	31371	28050	929160075366289	98229570924047	228410540479144	174555279198835	-1477	2866	10.43	0.01885	downReg
12079459	gene-ElguCp016	rpoC2	RNA polymerase beta' subunit	protein_coding	YP_006073094.1	ElguCp016	12925	18746	18050	13369	900119470402435	134971160048537	131421065813922	831953485778692	-0.3385	0.4204	10.07	0.5278	nonDE
12079460	gene-ElguCp017	rpoC1	RNA polymerase beta subunit	protein_coding	YP_006073095.1	ElguCp017	11576	20660	22774	15863	806172765135674	148751955969421	16581625223525	987155220652808	-0.6384	0.8052	10.21	0.2963	nonDE
12079461	gene-ElguCp018	rpoB	RNA polymerase beta subunit	protein_coding	YP_006073096.1	ElguCp018	7794	13297	13079	10655	542787710043836	95738371661442	952274858604039	663061140771334	-0.5537	0.7593	9564	0.3167	nonDE
12079462	gene-ElguCp027	psbC	photosystem II CP43 chlorophyll apoprotein	protein_coding	YP_006073100.1	ElguCp027	289375	445509	448556	262623	201525780849288	32076638505315	326591177823988	163430413864655	-0.276	0.2506	14.56	0.6932	nonDE
12079465	gene-ElguCp032	rps14	ribosomal protein S14	protein_coding	YP_006073102.1	ElguCp032	66203	86885	84571	81425	461049201540057	625571814830743	615756839720179	506708150045104	-0.4693	0.6492	12.42	0.3691	nonDE
12079466	gene-ElguCp033	psaB	photosystem I P700 apoprotein A2	protein_coding	YP_006073103.1	ElguCp033	501621	631719	605211	525928	349337585193609	454837545368087	440650829154071	327285236643441	-0.3431	0.398	15.25	0.5478	nonDE
12079469	rna-ElguCp039	trnL-UAA	tRNA-Leu	tRNA	.	ElguCp039	1467	1705	2057	1944	102164430412408	122759963663051	14976904840955	120975209541011	-0.68	1764	6.94	0.07576	nonDE
12079470	rna-ElguCp044	trnV-UAC	tRNA-Val	tRNA	.	ElguCp044	2452	2553	2973	3169	170761542857004	18381594559048	216462508955563	197207015964745	-0.6347	1579	7.58	0.09798	nonDE
12079471	gene-ElguCp046	atpE	ATP synthase CF1 epsilon subunit	protein_coding	YP_006073110.1	ElguCp046	12113	13879	24870	22237	84357037872222	99928770421084	181077113949709	138380953424046	-1199	2.3	10.24	0.03873	downReg
12079472	gene-ElguCp047	atpB	ATP synthase CF1 beta subunit	protein_coding	YP_006073111.1	ElguCp047	51114	67134	103836	101289	35596678228356	483364656924062	756024254285565	630321913539068	-1147	1943	12.39	0.05966	nonDE
12079473	gene-ElguCp048	rbcL	ribulose bisophosphate carboxylase	protein_coding	YP_006073112.1	ElguCp048	869907	1137398	1613726	1574020	605818358328334	81892631759781	117494510167112	979513370996617	-1019	1.52	16.41	0.105	nonDE
12079474	gene-ElguCp052	cemA	envelope membrane protein	protein_coding	YP_006073116.1	ElguCp052	8386	12675	35511	14782	584015619249116	91259972987048	25855365474339	919884540861742	-1496	1874	10.05	0.06574	nonDE
12079475	gene-ElguCp053	petA	cytochrome f	protein_coding	YP_006073117.1	ElguCp053	29187	33167	44664	36928	203263342225423	238802329314511	325196148671082	229803114091073	-0.7253	1186	11.26	0.1697	nonDE
12079476	gene-ElguCp067	psbB	photosystem II CP47 chlorophyll apoprotein	protein_coding	YP_006073130.1	ElguCp067	233741	276848	408166	387609	162781296039718	199330500998172	297183439052662	241209259233445	-0.9846	1572	14.42	0.09845	nonDE
12079477	gene-ElguCp068	psbT	photosystem II protein T	protein_coding	YP_006073131.1	ElguCp068	3465	6392	17113	5886	241308623980227	460223863773736	124598819904358	366286051110284	-1439	1565	8.89	0.09887	nonDE
12079478	gene-ElguCp091	rps7	ribosomal protein S7	protein_coding	YP_006073150.1	ElguCp091	7969	10997	12860	10569	554975014285262	791783765632005	936329588014981	657709356810157	-0.6574	1077	9494	0.1991	nonDE
12079479	rna-ElguCp095	trnI-GAU	tRNA-Ile	tRNA	.	ElguCp095	4673	4068	4644	2551	325435844115325	29289591330281	338127107833715	158748847499547	-0.01284	0.0121	8063	0.9864	nonDE
12079480	rna-ElguCp098	rrn23	23S ribosomal RNA	rRNA	.	ElguCp098	310	2601	8820	135	21588938941954	187271944567504	642179390846978	840105621812577	-0.6642	0.1527	6097	0.8037	nonDE
12079485	gene-ElguCp105	rpl32	ribosomal protein L32	protein_coding	YP_006073152.1	ElguCp105	2480	2796	16114	2251	172711511535632	201311940411666	117325155375376	14007983368149	-1556	1203	8103	0.1649	nonDE
12079487	gene-ElguCp107	ccsA	cytochrome c heme attachment protein	protein_coding	YP_006073153.1	ElguCp107	3211	3555	5927	4477	22361962239553	255959924235862	431541638270979	278603916211475	-0.9521	1961	8.17	0.05827	nonDE
12079488	gene-ElguCp108	ndhD	NADH dehydrogenase subunit 4	protein_coding	YP_006073154.1	ElguCp108	81151	102036	239345	127631	565149672283389	734658982540941	174265789458356	794248300870822	-1283	1739	13.09	0.0777	nonDE
12079489	gene-ElguCp109	psaC	photosystem I subunit VII	protein_coding	YP_006073155.1	ElguCp109	54912	51897	132206	103338	382416714574379	373658289397146	962584677395868	643072849976801	-1472	2532	12.41	0.02881	downReg
12079490	gene-ElguCp110	ndhE	NADH dehydrogenase subunit 4L	protein_coding	YP_006073156.1	ElguCp110	2368	3568	18492	5550	164911636821119	256895923958807	134639243713632	345376755634059	-2149	2493	8.55	0.0299	downReg
12079491	gene-ElguCp114	ndhH	NADH dehydrogenase subunit 7	protein_coding	YP_006073160.1	ElguCp114	6551	8327	20864	20576	456223029060453	599543822535029	15190964637904	128044542773449	-1827	3.5	9738	0.009435	downReg
12079492	rna-ElguCp125	rrn16	16S ribosomal RNA	rRNA	.	ElguCp125	158	1004	4010	43	110033946865443	722879786027583	291965913525667	267589198058821	-0.3306	0.06736	4817	0.9118	nonDE
12079493	rna-ElguCp126	trnV-GAC	tRNA-Val	tRNA	.	ElguCp126	164	172	178	59	114212451176789	123839963343371	129600829445308	367157271755126	0.4407	0.4014	3185	0.5451	nonDE
12079494	gene-ElguCp128	rps7	ribosomal protein S7	protein_coding	YP_006073163.1	ElguCp128	7434	10657	12255	10428	51771668417576	767303772878083	892279867894525	648934920315671	-0.6853	1131	9436	0.1837	nonDE
12079496	gene-ElguCp129	ndhB	NADH dehydrogenase subunit 2	protein_coding	YP_006073164.1	ElguCp129	12569	18771	27149	19235	875327011488449	135151159995257	197670388685993	119699493596777	-0.9142	1388	10.34	0.1274	nonDE
12079497	gene-ElguCp092	rps12	ribosomal protein S12	protein_coding	YP_006073083.1	ElguCp092	3866	5543	7557	6501	269234961127723	399095881867619	550221049504604	404557529437301	-0.9382	1752	8619	0.07647	nonDE
12079499	gene-ElguCp001	psbA	photosystem II protein D1	protein_coding	YP_006073084.1	ElguCp001	8695514	7507778	5953647	9049722	605570712306148	540559855994283	433481791811558	563164616891923	-0.2003	0.198	19.02	0.7504	nonDE
12079501	rna-ElguCp002	trnK-UUU	tRNA-Lys	tRNA	.	ElguCp002	685	831	1307	973	47704590887866	598319822897332	951619573511338	605498348165657	-0.9242	2209	5994	0.04352	downReg
12079502	gene-ElguCp132	ycf2	hypothetical protein RF2	protein_coding	YP_006073165.1	ElguCp132	5427	7879	5795	4417	377945714961239	567287832082802	421930790244698	274870113447863	0.02707	0.02792	8633	0.9679	nonDE
12079503	gene-ElguCp003	matK	maturase K	protein_coding	YP_006073085.1	ElguCp003	20754	45086	127216	45457	144534464129456	324619103912745	926252759478335	28287912037581	-1656	1668	11.7	0.08651	nonDE
12079505	gene-ElguCp134	rpl23	ribosomal protein L23	protein_coding	YP_006073166.1	ElguCp134	2108	2673	3672	3995	146804784805287	192455943033041	267356317822007	248609034010463	-1028	2417	7702	0.03348	downReg
12079506	gene-ElguCp004	rps16	ribosomal protein S16	protein_coding	YP_006073086.1	ElguCp004	2738	3197	10239	4010	190679080074419	230183931865556	745496007129502	249542484701365	-1464	2031	8232	0.05456	nonDE
12079507	gene-ElguCp135	rpl2	ribosomal protein L2	protein_coding	YP_006073167.1	ElguCp135	4655	6377	11042	15427	324182292821922	459143864093416	80396199928938	960022920570565	-1596	3059	9185	0.01542	downReg
12079509	gene-ElguCp073	rpoA	RNA polymerase alpha subunit	protein_coding	YP_006073136.1	ElguCp073	5972	9362	17318	11296	415900462455965	674063800477115	126091413726621	702950600295916	-1245	1945	9464	0.05951	nonDE
12079510	rna-ElguCp136	trnH-GUG	tRNA-His	tRNA	.	ElguCp136	151	155	314	384	105159025168872	11159996696641	228621687897904	238963376871133	-1522	3597	3995	0.008581	downReg
12079511	gene-ElguCp137	rps19	ribosomal protein S19	protein_coding	YP_006073168.1	ElguCp137	717	1004	3125	2588	499331265205838	722879786027583	227529546076735	161051359203774	-2091	4287	6745	0.00413	downReg
12079512	gene-ElguCp006	psbK	photosystem II protein K	protein_coding	YP_006073087.1	ElguCp006	2433	2587	43888	4729	169438349825077	186263944865872	319546134982904	294285887818643	-2879	2264	8697	0.04066	downReg
12079513	gene-ElguCp007	psbI	photosystem II protein I	protein_coding	YP_006073088.1	ElguCp007	502	566	5728	1418	349601527382609	407519879374116	417052556776813	882422053133507	-2.79	3147	6412	0.01403	downReg
105032035	XM_010906404,XM_010906474	LOC105032035	transmembrane 9 superfamily member 7, transcript variant X1	protein_coding	XP_010904706.1		306	335	222	238	213103719878642	241199928604821	161636989532913	148107509623254	0.1376	0.2327	4.23	0.7144	nonDE
105032155	gene-LOC105032155	LOC105032155	.	pseudogene	.	.	1223	982	956	1535	851718462129345	707039790716222	696058387357949	95523120702393	-0.4801	1132	6314	0.1834	nonDE
105032175	XM_010906547	LOC105032175	protein THYLAKOID FORMATION1, chloroplastic	protein_coding	XP_010904849.1	.	187	132	188	394	130230051036948	950399718681683	136881774919764	245186381477152	-1144	1918	3839	0.06173	nonDE
105032189	XM_010906569	LOC105032189	uncharacterized LOC105032189	protein_coding	XP_010904871.1	.	117	88	109	125	814808340712456	633599812454456	793623056715653	777875575752386	-0.5352	0.8049	2916	0.2964	nonDE
105032229	XM_010906648	LOC105032229	protein ROOT HAIR DEFECTIVE 3	protein_coding	XP_010904950.1	.	206	257	194	254	14346198135621	185039945228176	141250342204437	158064316992885	-0.294	0.5096	3967	0.458	nonDE
105032236	XM_010906620	LOC105032236	cyclic nucleotide-gated ion channel 4	protein_coding	XP_010904922.2	.	230	300	116	118	160175998601594	215999936064019	844589675036842	734314543510253	0.826	1.55	3602	0.1005	nonDE
105032321	XM_010906740	LOC105032321	chlorophyll a-b binding protein 13, chloroplastic	protein_coding	XP_010905042.1	.	474	495	1224	957	330101840596328	356399894505631	891187726073357	595541540796027	-1503	3729	5645	0.007536	downReg
105032350	XM_010906787	LOC105032350	B3 domain-containing protein Os07g0563300	protein_coding	XP_010905089.1	.	197	180	140	67	137194224889191	129599961638411	101933236642377	416941308603279	0.6685	0.8582	3227	0.2764	nonDE
105032429	XM_010906881,XM_010906889	LOC105032429	transmembrane protein 184C, transcript variant X1	protein_coding	XP_010905183.1		221	201	103	206	153908242134575	144719957162893	74993738386892	128193894883993	0.1699	0.2085	3601	0.7384	nonDE
105032478	XM_010906936	LOC105032478	receptor-like protein kinase THESEUS 1	protein_coding	XP_010905238.1	.	24	100	110	192	167140172453837	719999786880063	800904002190108	119481688435567	-2015	1485	2554	0.1112	nonDE
105032521	XM_010906985,XM_029260995	LOC105032521	secretory carrier-associated membrane protein 2, transcript variant X1	protein_coding	XP_010905287.1		85	111	103	183	591954777440673	79919976343687	74993738386892	113880984290149	-0.8642	1271	3002	0.1504	nonDE
105032531	XM_010907008,XM_029260996,XM_029260999	LOC105032531	brefeldin A-inhibited guanine nucleotide-exchange protein 5, transcript variant X2	protein_coding	XP_010905310.1		1395	1470	1217	1240	971502252387928	105839968671369	886091064241238	771652571146367	-0.119	0.2399	6517	0.7069	nonDE
105032602	XM_010907088,XM_010907095,XM_010907103,XM_010907109,XM_010907115,XM_010907124,XM_010907132,XM_010907137,XM_010907153,XM_019846001,XM_019846009	LOC105032602	protein STRUBBELIG-RECEPTOR FAMILY 3, transcript variant X2	protein_coding	XP_010905390.1		47	26	193	139	327316171055431	187199944588816	140522247656992	864997640236653	-2514	1295	2398	0.1445	nonDE
105032681	XM_010907191,XM_010907207,XM_029261034	LOC105032681	helicase-like transcription factor CHR28, transcript variant X1	protein_coding	XP_010905493.1		301	258	391	343	209621632952521	185759945015056	284684968051211	213449057986455	-0.7261	1768	4465	0.0752	nonDE
105032978	XM_010907588	LOC105032978	26S proteasome non-ATPase regulatory subunit 14 homolog	protein_coding	XP_010905890.1	.	158	228	119	182	110033946865443	164159951408654	866432511460208	113258683829547	0.01087	0.01129	3533	0.9869	nonDE
105033063	XM_010907744,XM_010907879,XM_029263406	LOC105033063	ATP-dependent zinc metalloprotease FTSH 5, mitochondrial, transcript variant X3	protein_coding	XP_010906046.1		411	363	140	197	286227545327196	261359922637463	101933236642377	122593190738576	0.8699	2079	4131	0.05139	nonDE
105033202	XM_010907891,XM_010907900,XR_829945	LOC105033202	carnosine N-methyltransferase, transcript variant X1	protein_coding	XP_010906193.1		129	125	36	39	898378426939374	899999733600079	262114037080399	242697179634744	1412	0.8376	2264	0.2836	nonDE
105033235	XM_010907949	LOC105033235	tubulin beta chain	protein_coding	XP_010906251.1	.	74	154	111	210	515348865065998	11087996717953	808184947664564	130683096726401	-0.8901	1105	3146	0.1906	nonDE
105033250	XM_010907972,XM_010907980	LOC105033250	actin-depolymerizing factor, transcript variant X1	protein_coding	XP_010906274.1		812	596	534	515	565490916802149	429119872980518	388802488335925	320484737209983	0.07137	0.1207	5383	0.8454	nonDE
105033298	XM_010908065	LOC105033298	WD-40 repeat-containing protein MSI4	protein_coding	XP_010906367.1	.	119	100	60	148	828736688416942	719999786880063	436856728467332	921004681690825	-0.175	0.1554	2815	0.8003	nonDE
105033399	XM_010908177,XM_010908184,XM_019848673	LOC105033399	GDP-L-galactose phosphorylase 2, transcript variant X3	protein_coding	XP_010906479.1		84	108	93	132	58499060358843	777599769830468	677127929124364	82143660799452	-0.5768	0.8035	2833	0.297	nonDE
105033414	XM_010908207	LOC105033414	photosystem II 10 kDa polypeptide, chloroplastic	protein_coding	XP_010906509.1	.	309	177	450	632	215192972034315	127439962277771	327642546350499	393293891100406	-1525	3223	4.61	0.01273	downReg
105033498	XM_010908328	LOC105033498	DEAD-box ATP-dependent RNA helicase 53	protein_coding	XP_010906630.1	.	105	178	94	46	731238254485537	128159962064651	68440887459882	286258211876878	0.7873	0.737	2719	0.3258	nonDE
105033626	XM_010908513,XM_029261220,XM_029261221,XM_029261224	LOC105033626	transcription factor PIF4, transcript variant X3	protein_coding	XP_010906815.1		208	227	164	798	144854816126659	163439951621774	119407505781071	496595767560323	-1108	0.9981	4278	0.2248	nonDE
105033638	XM_010908522	LOC105033638	uncharacterized oxidoreductase At1g06690, chloroplastic	protein_coding	XP_010906824.1	.	1143	1011	490	655	796005071311399	727919784535744	356766328248321	40760680169425	0.5817	1695	5753	0.08351	nonDE
105033710	XM_010908646,XM_010908718	LOC105033710	developmentally-regulated G-protein 2, transcript variant X1	protein_coding	XP_010906948.1		271	223	113	128	188729111395791	160559952474254	822746838613475	796544589570443	0.6906	1385	3574	0.1279	nonDE
105033760	XM_010908674,XM_019853789,XM_029261250,XM_029261252,XM_029261255,XM_029261257,XM_029261260,XR_003798862,XR_003798863,XR_003798864	LOC105033760	uncharacterized LOC105033760, transcript variant X5	protein_coding	XP_010906976.1		286	241	95	45	199175372174156	173519948638095	691689820073275	280035207270859	1751	2353	3184	0.03612	upReg
105033839	XM_010908779	LOC105033839	vacuolar protein sorting-associated protein 53 A	protein_coding	XP_010907081.1	.	422	432	350	286	293888136564664	311039907932187	254833091605944	177977931732146	0.1007	0.161	4667	0.794	nonDE
105033844	XM_010908789	LOC105033844	probable protein NAP1	protein_coding	XP_010907091.1	.	201	229	299	146	139979894430089	164879951195534	21770026968622	908558672478787	-0.2839	0.3111	3873	0.6321	nonDE
105033866	XM_010908826,XM_010908834,XM_019846598,XM_029261280	LOC105033866	probable UDP-arabinose 4-epimerase 1, transcript variant X2	protein_coding	XP_010907128.1		121	198	284	302	842665036121429	142559957802253	206778851474537	187934739101776	-1264	2.51	3881	0.02929	downReg
105033889	XM_010908861	LOC105033889	protein PAT1 homolog 1	protein_coding	XP_010907163.1	.	256	302	231	147	178282850617426	217439935637779	168189840459923	914781677084806	0.264	0.3599	3969	0.5827	nonDE
105033893	XM_010908902,XM_019853946	LOC105033893	protein indeterminate-domain 7, transcript variant X1	protein_coding	XP_010907204.1		190	106	108	161	132319303192621	763199774092867	786342111241197	100190374156907	-0.2378	0.277	3245	0.6653	nonDE
105033957	XM_010908946	LOC105033957	chloroplast stem-loop binding protein of 41 kDa a, chloroplastic	protein_coding	XP_010907248.1	.	886	500	208	229	617025803308749	359999893440032	151443665868675	142506805477837	1.27	2537	4.72	0.02865	upReg
105034007	XM_010909030	LOC105034007	UPF0613 protein PB24D3.06c	protein_coding	XP_010907332.1	.	217	198	58	71	151122572593678	142559957802253	422294837518421	441833327027355	1336	2036	3001	0.05415	nonDE
105034097	XM_010909124	LOC105034097	stem-specific protein TSJT1	protein_coding	XP_010907426.1	.	307	209	187	573	213800137263867	150479955457933	136153680372318	356578163924894	-0.7308	0.866	4316	0.274	nonDE
105034203	XM_010909261,XM_029261343	LOC105034203	oligopeptide transporter 3, transcript variant X1	protein_coding	XP_010907563.1		802	850	341	382	558526742949906	611999818848054	248280240678934	237718775949929	0.8534	2526	5237	0.02881	upReg
105034212	XM_010909267	LOC105034212	mitochondrial import inner membrane translocase subunit TIM50	protein_coding	XP_010907569.1	.	148	99	90	46	1030697730132	712799789011263	655285092700998	286258211876878	0.6599	0.6516	2616	0.3677	nonDE
105034220	XM_010909276	LOC105034220	transcriptional adapter ADA2	protein_coding	XP_010907578.1	.	332	226	135	277	231210571894475	162719951834894	982927639051497	172377227586729	0.1526	0.1777	3993	0.7748	nonDE
105034271	XM_010909355	LOC105034271	40S ribosomal protein S19	protein_coding	XP_010907657.1	.	201	144	91	113	139979894430089	103679969310729	662566038175453	703199520480157	0.4023	0.5843	3187	0.406	nonDE
105034280	XM_010909365	LOC105034280	40S ribosomal protein S19	protein_coding	XP_010907667.1	.	502	421	213	316	349601527382609	303119910276507	155084138605903	196646945550203	0.4779	1078	4578	0.199	nonDE
105034289	XM_010909378,XM_029261370	LOC105034289	chitin-inducible gibberellin-responsive protein 2, transcript variant X1	protein_coding	XP_010907680.1		144	169	258	299	100284103472302	121679963982731	187848393240953	186067837719971	-1173	2717	3849	0.02272	downReg
105034513	XM_010909708,XM_010909717	LOC105034513	leucine--tRNA ligase, cytoplasmic, transcript variant X1	protein_coding	XP_010908010.1		628	556	420	445	437350117920874	400319881505315	305799709927132	276923704967849	0.1126	0.2243	5126	0.7216	nonDE
105034573	XM_010909787	LOC105034573	KH domain-containing protein At1g09660/At1g09670	protein_coding	XP_010908089.1	.	330	397	363	658	229817737124026	285839915391385	264298320722736	409473703076056	-0.7827	1651	4862	0.08851	nonDE
105034677	XM_010909918,XM_010909925,XM_019848500,XM_019848501,XM_019848502,XM_019848503,XM_019848504,XM_019848505,XM_019848506,XM_019848507,XM_019848508,XM_019848509,XM_019848510	LOC105034677	uncharacterized LOC105034677, transcript variant X9	protein_coding	XP_010908220.2		111	149	57	97	773023297598997	107279968245129	415013892043965	603631446783852	0.4125	0.4501	2763	0.5043	nonDE
105034762	XM_010910034	LOC105034762	guanosine nucleotide diphosphate dissociation inhibitor 1	protein_coding	XP_010908336.1	.	562	563	362	577	391386570496068	405359880013476	26357022617529	359067365767301	-0.04688	0.07278	5131	0.9049	nonDE
105034884	XM_010910204	LOC105034884	probable thiol methyltransferase 2	protein_coding	XP_010908506.2	.	123	173	53	77	856593383825915	124559963130251	385890110146143	47917135466347	0.8116	0.9454	2745	0.243	nonDE
105034901	XM_010910224	LOC105034901	ankyrin repeat-containing protein At5g02620	protein_coding	XP_010908526.1	.	258	213	172	146	179675685387875	153359954605453	125232262160635	908558672478787	0.2352	0.3669	3738	0.5764	nonDE
105034932	XM_010910282,XM_010910290,XM_019848664	LOC105034932	probably inactive leucine-rich repeat receptor-like protein kinase At5g48380, transcript variant X3	protein_coding	XP_010908584.1		145	232	275	284	100980520857527	167039950556175	200226000547527	176733330810942	-0.9477	1878	3.97	0.06549	nonDE
105034979	XM_010910382	LOC105034979	IQ domain-containing protein IQM1	protein_coding	XP_010908684.1	.	8	32	105	256	0.557133908179457	23039993180162	764499274817831	159308917914089	-3713	0.6799	1852	0.3525	nonDE
105035012	XM_010910403,XM_010910410,XM_010910414	LOC105035012	sister chromatid cohesion 1 protein 4, transcript variant X1	protein_coding	XP_010908705.1		203	186	207	134	141372729200537	133919960359692	15071557132123	833882617206558	-0.1007	0.116	3639	0.8502	nonDE
105035033	XM_010910425	LOC105035033	acyl-coenzyme A thioesterase 9, mitochondrial	protein_coding	XP_010908727.1	.	175	203	81	101	121873042414256	146159956736653	589756583430898	628523465207928	0.7078	1172	3178	0.1731	nonDE
105035041	XM_010910433	LOC105035041	formin-like protein 1	protein_coding	XP_010908735.1	.	12	71	165	154	0.835700862269185	511199848684845	120135600328516	95834270932694	-2822	1278	2255	0.1493	nonDE
105035046	XM_010910442,XM_010910449	LOC105035046	beta-glucosidase 4, transcript variant X1	protein_coding	XP_010908744.1		254	281	183	150	176890015846978	202319940113298	133241302182536	933450690902863	0.3561	0.6197	3864	0.3831	nonDE
105035054	XM_010910484	LOC105035054	carbamoyl-phosphate synthase large chain, chloroplastic	protein_coding	XP_010908786.1	.	214	205	262	363	149033320438005	147599956310413	190760771430735	225895067198493	-0.9023	2188	4136	0.04453	downReg
105035062	XM_010910461	LOC105035062	ribonuclease 2	protein_coding	XP_010908763.1	.	235	118	298	240	163658085527715	849599748518474	216972175138775	149352110544458	-1003	1691	3869	0.08386	nonDE
105035082	XM_010910490	LOC105035082	uncharacterized LOC105035082	protein_coding	XP_010908792.1	.	104	125	60	28	724274080633294	899999733600079	436856728467332	174244128968534	1224	0.7333	2251	0.3278	nonDE
105035136	XM_010910570	LOC105035136	probable ion channel CASTOR	protein_coding	XP_010908872.2	.	151	107	108	60	105159025168872	770399771961667	786342111241197	373380276361145	0.3682	0.3719	2812	0.5722	nonDE
105035171	XM_010910621	LOC105035171	peptide chain release factor PrfB1, chloroplastic	protein_coding	XP_010908923.1	.	334	246	84	118	232603406664923	177119947572496	611599419854265	734314543510253	1172	2194	3549	0.0442	upReg
105035213	XM_010910676	LOC105035213	flowering time control protein FPA	protein_coding	XP_010908978.1	.	226	223	160	141	157390329060697	160559952474254	116495127591289	877443649448692	0.2479	0.3986	3668	0.5476	nonDE
105035255	XM_010910759,XM_010910769	LOC105035255	TBC1 domain family member 22B, transcript variant X1	protein_coding	XP_010909061.1		241	215	98	106	167836589839061	154799954179214	713532656496642	659638488238023	0.8193	1584	3.4	0.097	nonDE
105035271	XM_010910787	LOC105035271	protein CLP1 homolog	protein_coding	XP_010909089.1	.	220	142	77	21	153211824749351	102239969736969	560632801533076	130683096726401	1949	1122	2554	0.186	nonDE
105035295	XM_010910820,XM_029262293,XR_003799578	LOC105035295	starch synthase 3, chloroplastic/amyloplastic, transcript variant X2	protein_coding	XP_010909122.1		685	494	228	176	47704590887866	355679894718751	166005556817586	109524881065936	1206	2641	4561	0.02484	upReg
105035312	XM_010910843	LOC105035312	probable membrane-associated 30 kDa protein, chloroplastic	protein_coding	XP_010909145.1	.	665	315	155	184	463117561174174	22679993286722	112854654854061	114503284750751	1.1	1773	4266	0.0747	nonDE
105035317	XM_010910888	LOC105035317	casein kinase 1-like protein 2	protein_coding	XP_010909190.1	.	439	454	647	592	305727232113477	326879903243549	471077172197273	36840187267633	-0.8087	2287	5183	0.03969	downReg
105035371	XM_010910921	LOC105035371	fructokinase-1	protein_coding	XP_010909223.1	.	246	223	176	207	171318676765183	160559952474254	128144640350417	128816195344595	-0.04524	0.06385	3871	0.9169	nonDE
105035389	XM_010910940	LOC105035389	proteasome subunit beta type-4	protein_coding	XP_010909242.1	.	553	442	138	231	38511881402905	318239905800988	100477047547486	143751406399041	1118	2.51	4361	0.02929	upReg
105035462	XM_010911031,XM_019848558	LOC105035462	aspartic proteinase, transcript variant X2	protein_coding	XP_010909333.1		2328	2281	998	1532	162125967280222	164231951387342	726638358350662	953364305642124	0.5629	1353	6865	0.133	nonDE
105035492	XM_010911065	LOC105035492	dnaJ protein ERDJ2	protein_coding	XP_010909367.1	.	270	294	427	304	188032694010567	211679937342739	310896371759251	18917934002298	-0.6851	1389	4461	0.1274	nonDE
105035555	XM_010911151	LOC105035555	protoporphyrinogen oxidase, chloroplastic	protein_coding	XP_010909453.1	.	145	194	92	94	100980520857527	139679958654732	669846983649909	584962432965794	0.5102	0.7258	3114	0.331	nonDE
105035637	XM_010911258,XM_010911264,XM_019848752,XM_029262245	LOC105035637	protein phosphatase 2C 32, transcript variant X2	protein_coding	XP_010909560.1		153	167	134	175	106551859939321	120239964408971	975646693577041	108902580605334	-0.2847	0.4595	3438	0.4965	nonDE
105035667	XM_010911341	LOC105035667	26S proteasome non-ATPase regulatory subunit 12 homolog A	protein_coding	XP_010909643.1	.	238	272	157	198	165747337683388	195839942031377	114310843948952	123215491199178	0.1833	0.2939	3874	0.6493	nonDE
105035741	XM_010911417	LOC105035741	ferredoxin C 2, chloroplastic	protein_coding	XP_010909719.1	.	166	157	233	131	115605285947237	11303996654017	169646029554814	815213603388501	-0.4338	0.5712	3.54	0.4148	nonDE
105035892	XM_010911637,XM_010911699	LOC105035892	THO complex subunit 6, transcript variant X2	protein_coding	XP_010909939.2		142	145	91	126	988912687018536	104399969097609	662566038175453	784098580358405	0.06844	0.07753	3103	0.8995	nonDE
105035928	XM_019847650	LOC105035928	calreticulin-3	protein_coding	XP_019703209.1	.	76	159	161	181	529277212770484	11447996611393	117223222138734	112636383368946	-0.9897	1469	3247	0.1135	nonDE
105036057	XM_010911800,XM_029262420,XM_029262421	LOC105036057	protein YLS7, transcript variant X1	protein_coding	XP_010910102.1		153	126	81	94	106551859939321	90719973146888	589756583430898	584962432965794	0.3285	0.4298	2933	0.521	nonDE
105036107	XM_010911851,XM_019848405,XM_029262418	LOC105036107	shaggy-related protein kinase kappa, transcript variant X1	protein_coding	XP_010910153.1		121	71	131	107	842665036121429	511199848684845	953803857153675	665861492844043	-0.6614	0.8737	2862	0.2704	nonDE
105036117	XM_010911888,XM_029263545,XR_003800355	LOC105036117	uncharacterized LOC105036117, transcript variant X3	protein_coding	XP_010910190.1		156	175	266	201	108641112094994	125999962704011	193673149620517	125082392580984	-0.8149	1576	3758	0.0982	nonDE
105036143	XM_010911893,XM_010911908,XM_029262412,XM_029262413,XM_029262414,XM_029262415,XM_029262416,XR_003799715,XR_003799716,XR_003799717,XR_003799718,XR_003799719	LOC105036143	regulator of nonsense transcripts UPF3, transcript variant X7	protein_coding	XP_010910195.1		116	84	60	120	807844166860213	604799820979253	436856728467332	746760552722291	-0.1523	0.1349	2668	0.8251	nonDE
105036216	XM_010911984,XM_029262410,XM_029262411,XR_830460,XR_830461,XR_830463	LOC105036216	mitotic spindle checkpoint protein MAD1, transcript variant X1	protein_coding	XP_010910286.1		236	254	207	184	16435450291294	182879945867536	15071557132123	114503284750751	-0.009139	0.01161	3919	0.9867	nonDE
105036427	XM_010912196,XM_019848552,XM_029262402,XM_029262403,XM_029262404,XR_003799712,XR_003799713,XR_003799714	LOC105036427	phospholipase SGR2, transcript variant X1	protein_coding	XP_010910498.1		242	177	130	138	168533007224286	127439962277771	946522911679219	858774635630634	0.2919	0.4562	3527	0.4995	nonDE
105036581	XM_010912340	LOC105036581	3-phosphoinositide-dependent protein kinase 2	protein_coding	XP_010910642.1	.	118	99	80	98	821772514564699	712799789011263	582475637956443	609854451389871	-0.05531	0.05403	2763	0.9281	nonDE
105036626	XM_010912379	LOC105036626	transportin-1	protein_coding	XP_010910681.1	.	638	432	495	490	444314291773117	311039907932187	360406800985549	304927225694935	-0.2425	0.4733	5135	0.4862	nonDE
105036650	XM_010912404	LOC105036650	probable magnesium transporter NIPA6	protein_coding	XP_010910706.2	.	175	149	116	186	121873042414256	107279968245129	844589675036842	115747885671955	-0.2156	0.3012	3415	0.6416	nonDE
105036676	XM_019848640	LOC105036676	uncharacterized LOC105036676	protein_coding	XP_019704199.1	.	404	386	265	316	281352623630626	277919917735704	192945055073072	196646945550203	0.1068	0.1918	4547	0.7579	nonDE
105036687	XM_010912436	LOC105036687	cystathionine beta-lyase, chloroplastic	protein_coding	XP_010910738.1	.	140	116	83	82	97498433931405	835199752780873	604318474379809	510286377693565	0.2964	0.3581	2831	0.5845	nonDE
105036719	XM_010912461,XM_019847686	LOC105036719	DAR GTPase 3, chloroplastic, transcript variant X2	protein_coding	XP_010910763.1		136	137	46	121	947127643905077	986399708025686	334923491824954	75298355732831	0.4694	0.4911	2809	0.4715	nonDE
105036736	XM_010912476	LOC105036736	uncharacterized LOC105036736	protein_coding	XP_010910778.1	.	163	126	153	94	113516033791564	90719973146888	11139846575917	584962432965794	-0.04862	0.04626	3184	0.9418	nonDE
105036768	XM_029263558	LOC105036768	vesicle transport v-SNARE 13	protein_coding	XP_029119391.1	.	218	203	194	302	151818989978902	146159956736653	141250342204437	187934739101776	-0.5499	1111	3965	0.189	nonDE
105036806	XM_010912543	LOC105036806	transmembrane 9 superfamily member 1	protein_coding	XP_010910845.1	.	532	430	546	332	370494048939339	309599908358427	397539622905272	206603752919834	-0.1586	0.2122	4963	0.7338	nonDE
105036827	XM_010912560	LOC105036827	FT-interacting protein 3	protein_coding	XP_010910862.1	.	186	197	90	39	129533633651724	141839958015372	655285092700998	242697179634744	1493	1735	2887	0.07815	nonDE
105036846	XM_010912576,XM_010912581	LOC105036846	patellin-3, transcript variant X1	protein_coding	XP_010910878.1		210	190	117	197	146247650897107	136799959507212	851870620511297	122593190738576	0.04093	0.04821	3592	0.9383	nonDE
105036876	XM_010912601	LOC105036876	1-phosphatidylinositol-3-phosphate 5-kinase FAB1A	protein_coding	XP_010910903.1	.	280	299	297	199	19499686786281	215279936277139	216244080591329	12383779165978	-0.07602	0.09373	4197	0.878	nonDE
105036922	XM_010912646,XM_029262460	LOC105036922	potassium channel AKT2, transcript variant X1	protein_coding	XP_010910948.1		542	449	533	1299	377458222791582	323279904309148	38807439378848	80836829832188	-1095	1939	5468	0.05994	nonDE
105036937	XM_010912656	LOC105036937	UDP-galactose transporter 1	protein_coding	XP_010910958.1	.	93	106	152	128	647668168258619	763199774092867	110670371211724	796544589570443	-0.8199	1345	3029	0.1347	nonDE
105036968	XM_010912687	LOC105036968	ubiquitin-like domain-containing CTD phosphatase	protein_coding	XP_010910989.2	.	299	305	177	214	208228798182072	219599934998419	128872734897863	133172298568809	0.2907	0.5687	4068	0.4162	nonDE
105036994	XM_029262459	LOC105036994	ABC transporter D family member 1-like	protein_coding	XP_029118292.1	.	266	342	301	156	185247024469669	246239927112982	219156458781111	970788718538978	0.151	0.1588	4145	0.7968	nonDE
105037004	XM_010912714	LOC105037004	uncharacterized LOC105037004	protein_coding	XP_010911016.1	.	135	106	79	0	940163470052834	763199774092867	575194692481987	0	3917	0.5633	0.926	0.4198	nonDE
105037081	XM_010912787,XM_010912794	LOC105037081	probable methyltransferase PMT26, transcript variant X1	protein_coding	XP_010911089.1		0	215	409	237	0	154799954179214	297790669905231	147485209162652	-5386	0.6256	1974	0.3802	nonDE
105037223	XM_010912944	LOC105037223	vacuolar-processing enzyme	protein_coding	XP_010911246.1	.	1187	1142	345	756	826647436261269	822239756617032	251192618868716	470459148215043	0.8373	1656	5735	0.08802	nonDE
105037249	XM_010912939	LOC105037249	ubinuclein-1	protein_coding	XP_010911241.1	.	113	123	96	157	786951645303483	885599737862478	698970765547731	977011723144997	-0.4193	0.5933	3.06	0.3993	nonDE
105037320	XM_010913027,XM_010913161,XM_029263577,XR_002165698,XR_003800363,XR_003800364,XR_003800368,XR_830582,XR_830597	LOC105037320	pentatricopeptide repeat-containing protein At1g10910, chloroplastic, transcript variant X1	protein_coding	XP_010911329.1		402	322	182	249	279959788860177	23183993137538	132513207635091	154952814689875	0.4134	0.8629	4259	0.2747	nonDE
105037336	XM_010913015	LOC105037336	uncharacterized LOC105037336	protein_coding	XP_010911317.1	.	322	306	152	136	224246398042231	220319934785299	110670371211724	846328626418596	0.7937	1.77	3878	0.075	nonDE
105037408	XM_010913080	LOC105037408	probable magnesium transporter NIPA4	protein_coding	XP_010911382.1	.	203	321	228	226	141372729200537	2311199315885	166005556817586	140639904096031	-0.1731	0.2303	4058	0.7172	nonDE
105037449	XM_019848493,XM_029262451,XM_029262452,XM_029262453	LOC105037449	valine--tRNA ligase, mitochondrial 1, transcript variant X4	protein_coding	XP_019704052.1		597	454	321	406	41576117897892	326879903243549	233718349730023	252653987004375	0.1873	0.3658	4905	0.5772	nonDE
105037595	XM_010913239	LOC105037595	ras-related protein RABC1	protein_coding	XP_010911541.1	.	140	109	48	154	97498433931405	784799767699269	349485382773866	95834270932694	0.1169	0.0885	2839	0.8859	nonDE
105037604	XM_010913274,XM_010913331,XM_010913383,XM_010913441	LOC105037604	PITH domain-containing protein 1, transcript variant X1	protein_coding	XP_010911576.1		98	83	145	120	682489037519835	597599823110452	105573709379605	746760552722291	-0.8679	1365	2919	0.1308	nonDE
105037681	gene-LOC105037681	LOC105037681	.	pseudogene	.	.	320	220	159	171	222853563271783	158399953113614	115767033043843	106413378762926	0.3507	0.6042	3856	0.3924	nonDE
105037749	XM_010913379,XM_010913386	LOC105037749	lysine--tRNA ligase, transcript variant X1	protein_coding	XP_010911681.1		1227	739	532	771	854504131670242	532079842504367	387346299241034	479793655124072	0.2294	0.3874	5754	0.5575	nonDE
105037879	XM_010913501,XM_010913517,XM_029263598,XM_029263600,XM_029263603,XR_002166052	LOC105037879	zinc protease PQQL-like, transcript variant X5	protein_coding	XP_010911803.1		604	588	472	701	42063610067549	423359874685477	343660626394301	436232622881938	-0.2919	0.667	5338	0.3601	nonDE
105037882	XM_010913497,XM_010913498,XM_010913499	LOC105037882	putative UDP-glucuronate:xylan alpha-glucuronosyltransferase 3, transcript variant X2	protein_coding	XP_010911799.1		101	239	266	150	703381559076564	172079949064335	193673149620517	933450690902863	-0.6987	0.7435	3609	0.3233	nonDE
105037888	XM_010913504,XM_010913507,XM_010913508,XM_029262431,XM_029262432,XM_029262433	LOC105037888	uncharacterized LOC105037888, transcript variant X1	protein_coding	XP_010911806.1		179	150	65	36	124658711955153	107999968032009	47326145583961	224028165816687	1523	1344	2.63	0.1351	nonDE
105037895	XM_010913520	LOC105037895	extradiol ring-cleavage dioxygenase	protein_coding	XP_010911822.1	.	140	134	111	121	97498433931405	964799714419285	808184947664564	75298355732831	-0.09741	0.1193	3126	0.8463	nonDE
105037898	XM_010913524,XM_010913526,XM_010913527,XM_010913528,XM_019848627	LOC105037898	transcriptional activator SPT7, transcript variant X2	protein_coding	XP_010911826.2		164	167	154	204	114212451176789	120239964408971	112126560306615	126949293962789	-0.4432	0.8408	3568	0.2831	nonDE
105037903	XM_010913533	LOC105037903	protein KTI12 homolog	protein_coding	XP_010911835.1	.	105	123	47	29	731238254485537	885599737862478	34220443729941	180467133574554	1328	0.7203	2174	0.3332	nonDE
105037913	XM_010913579	LOC105037913	acyl transferase 5	protein_coding	XP_010911881.1	.	0	32	107	184	0	23039993180162	779061165766742	114503284750751	-5484	0.8041	0.7181	0.2967	nonDE
105037924	XM_010913555,XR_830633	LOC105037924	uncharacterized LOC105037924, transcript variant X1	protein_coding	XP_010911857.1	.	254	241	39	46	176890015846978	173519948638095	283956873503766	286258211876878	2188	1751	2831	0.07654	nonDE
105037930	XM_010913562	LOC105037930	chlorophyllide a oxygenase, chloroplastic	protein_coding	XP_010911864.1	.	51	42	468	603	355172866464404	302399910489626	340748248204519	375247177742951	-3.84	3436	3445	0.01022	downReg
105037935	XM_010913569	LOC105037935	photosystem II 22 kDa protein, chloroplastic	protein_coding	XP_010911871.1	.	6515	4282	1340	2247	453715926473645	308303908742043	975646693577041	139830913497249	1272	2541	7708	0.02848	upReg
105037936	XM_010913570	LOC105037936	serine/threonine-protein kinase SAPK7	protein_coding	XP_010911872.1	.	116	188	77	95	807844166860213	135359959933452	560632801533076	591185437571813	0.4309	0.4905	2963	0.4718	nonDE
105037940	XM_010913575,XM_010913576	LOC105037940	subtilisin-like protease SBT3.9, transcript variant X1	protein_coding	XP_010911877.1		379	362	427	392	263942189000018	260639922850583	310896371759251	243941780555948	-0.4786	1193	4.75	0.1675	nonDE
105037942	XM_010913578,XM_019848425,XM_029262467,XR_003799740	LOC105037942	DDB1- and CUL4-associated factor homolog 1, transcript variant X4	protein_coding	XP_010911880.1		256	249	192	161	178282850617426	179279946933136	139794153109546	100190374156907	0.1893	0.2947	3866	0.6486	nonDE
105037944	XM_010913582,XM_010913583	LOC105037944	zinc finger protein STOP1 homolog, transcript variant X2	protein_coding	XP_010911884.1		218	134	88	176	151818989978902	964799714419285	640723201752087	109524881065936	0.0939	0.09106	3337	0.8825	nonDE
105037950	XM_010913590,XM_010913591,XM_010913592,XR_830635	LOC105037950	probable alkaline/neutral invertase D, transcript variant X4	protein_coding	XP_010911892.1		155	183	132	109	10794469470977	131759960999052	96108480262813	678307502056081	0.1621	0.2025	3.3	0.746	nonDE
105037954	XM_010913599,XM_010913606	LOC105037954	RNA cytidine acetyltransferase 1, transcript variant X1	protein_coding	XP_010911901.1		236	132	107	96	16435450291294	950399718681683	779061165766742	597408442177833	0.4782	0.6066	3213	0.3907	nonDE
105037971	XM_010913617	LOC105037971	ras-related protein RIC1	protein_coding	XP_010911919.1	.	267	240	188	290	185943441854894	172799948851215	136881774919764	180467133574554	-0.2305	0.3853	4072	0.5594	nonDE
105037975	XM_010913618	LOC105037975	WD repeat-containing protein 36	protein_coding	XP_010911920.2	.	197	173	87	30	137194224889191	124559963130251	633442256277631	186690138180573	1705	1571	2755	0.09845	nonDE
105037978	XM_010913623	LOC105037978	mitochondrial import inner membrane translocase subunit TIM44-2	protein_coding	XP_010911925.1	.	196	204	79	36	136497807503967	146879956523533	575194692481987	224028165816687	1715	1796	2843	0.0726	nonDE
105037979	XM_010913629,XM_010913638,XM_010913646,XM_010913653	LOC105037979	60S ribosomal protein L28-2, transcript variant X1	protein_coding	XP_010911931.1		374	311	205	264	260460102073896	2239199337197	149259382226338	164287321598904	0.2096	0.3857	4284	0.5594	nonDE
105037981	XM_010913627,XM_010913628,XM_029262471	LOC105037981	TBC1 domain family member 17, transcript variant X2	protein_coding	XP_010911929.1		296	256	170	175	206139546026399	184319945441296	123776073065744	108902580605334	0.3373	0.6522	3914	0.3675	nonDE
105037992	XM_010913644,XM_019848743	LOC105037992	glycine-rich RNA-binding protein RZ1A, transcript variant X2	protein_coding	XP_010911946.1		82	140	99	312	571062255883943	100799970163209	720813601971098	194157743707796	-1093	1123	3.25	0.1857	nonDE
105037994	XM_010913647,XM_010913648	LOC105037994	PH, RCC1 and FYVE domains-containing protein 1, transcript variant X1	protein_coding	XP_010911949.1		261	201	298	269	181764937543548	144719957162893	216972175138775	167398823901914	-0.6357	1.39	4139	0.1274	nonDE
105037999	XM_010913659,XM_010913660,XM_010913661,XM_019848575,XM_019848576,XM_019848577,XM_029262476,XM_029262477,XM_029262478,XM_029262479,XR_002164034,XR_830637,XR_830638,XR_830639	LOC105037999	serine/threonine-protein kinase STY46, transcript variant X14	protein_coding	XP_010911961.1		252	282	109	181	175497181076529	203039939900178	793623056715653	112636383368946	0.5645	1031	3744	0.215	nonDE
105038005	NM_001319906,XM_029261651	LOC105038005	actin-3-like	protein_coding	NP_001306835.1		232	281	318	347	161568833372043	202319940113298	231534066087686	215938259828862	-0.7203	1755	4332	0.07635	nonDE
105038009	XM_010913671	LOC105038009	fructose-1,6-bisphosphatase, cytosolic	protein_coding	XP_010911973.1	.	238	204	197	308	165747337683388	146879956523533	143434625846774	191668541865388	-0.5079	1003	4011	0.223	nonDE
105038022	XM_010913693	LOC105038022	glycerol-3-phosphate acyltransferase 9	protein_coding	XP_010911995.2	.	623	444	636	689	433868030994752	319679905374748	463068132175372	428765017354715	-0.6686	1.82	5349	0.07061	nonDE
105038027	XM_010913703,XM_029262482	LOC105038027	cellulose synthase A catalytic subunit 2 [UDP-forming], transcript variant X1	protein_coding	XP_010912005.1		48	98	168	119	334280344907674	705599791142462	122319883970853	740537548116272	-1388	1655	2773	0.08805	nonDE
105038030	XM_010913706	LOC105038030	60S ribosomal protein L3	protein_coding	XP_010912008.1	.	1893	1889	758	1692	131831811022964	136007959741644	551895666963729	105293237933843	0.4077	0.6215	6659	0.3824	nonDE
105038032	XM_010913712,XM_010913713	LOC105038032	polypyrimidine tract-binding protein homolog 3, transcript variant X1	protein_coding	XP_010912014.1		751	608	335	402	523009456303465	437759870423078	24391167339426	250164785161967	0.5398	1469	5105	0.1135	nonDE
105038036	XM_010913720	LOC105038036	ribonucleoside-diphosphate reductase large subunit	protein_coding	XP_010912022.1	.	107	94	76	115	745166602190024	676799799667259	55335185605862	715645529692195	-0.2546	0.2875	2748	0.6558	nonDE
105038041	XM_010913726	LOC105038041	40S ribosomal protein S10-1	protein_coding	XP_010912028.1	.	513	371	162	217	357262118620077	267119920932503	11795131668618	135039199950614	0.875	2003	4306	0.05626	nonDE
105038049	XM_010913738,XM_010913739,XM_029262486,XM_029262487,XR_003799749	LOC105038049	uncharacterized LOC105038049, transcript variant X1	protein_coding	XP_010912040.1		145	120	102	191	100980520857527	863999744256076	742656438394464	118859387974965	-0.4393	0.6199	3233	0.3831	nonDE
105038050	XM_010913741	LOC105038050	magnesium transporter MRS2-F	protein_coding	XP_010912043.1	.	199	137	116	206	13858705965964	986399708025686	844589675036842	128193894883993	-0.2568	0.3327	3468	0.6091	nonDE
105038055	XM_010913746	LOC105038055	sister chromatid cohesion protein PDS5 homolog A	protein_coding	XP_010912048.1	.	553	736	613	562	38511881402905	529919843143726	446321957584124	349732858858273	-0.218	0.4103	5402	0.5375	nonDE
105038056	XM_010913748	LOC105038056	small glutamine-rich tetratricopeptide repeat-containing protein	protein_coding	XP_010912050.1	.	109	99	309	205	75909494989451	712799789011263	224981215160676	127571594423391	-1596	2612	3486	0.02564	downReg
105038067	XM_010913757	LOC105038067	BTB/POZ domain-containing protein At1g21780	protein_coding	XP_010912059.1	.	115	118	68	106	800879993007969	849599748518474	495104292262976	659638488238023	0.09219	0.09062	2787	0.8831	nonDE
105038077	XM_010913767,XM_010913773,XM_019855176	LOC105038077	DEAD-box ATP-dependent RNA helicase 56, transcript variant X1	protein_coding	XP_010912069.1		1000	968	1264	1512	696417385224321	696959793699901	920311507971179	940918296430086	-0.8289	2606	6332	0.02578	downReg
105038092	XM_010913787	LOC105038092	ubiquitin carboxyl-terminal hydrolase 6	protein_coding	XP_010912089.1	.	298	288	221	187	207532380796848	207359938621458	160908894985467	116370186132557	0.193	0.3177	4078	0.6246	nonDE
105038099	XM_010913785,XM_019848439	LOC105038099	pyruvate, phosphate dikinase 2, transcript variant X2	protein_coding	XP_010912087.1		904	587	517	1032	629561316242786	422639874898597	376424881029351	64221407534117	-0.3465	0.5404	5655	0.4356	nonDE
105038109	XM_010913800,XM_010913802,XM_029262492,XR_830654,XR_830656	LOC105038109	autophagy-related protein 18h, transcript variant X1	protein_coding	XP_010912102.1		174	129	113	99	121176625029032	928799725075281	822746838613475	61607745599589	0.1798	0.2164	3125	0.7301	nonDE
105038112	XM_010913805,XM_019848790	LOC105038112	proteasome subunit beta type-5, transcript variant X1	protein_coding	XP_010912107.1		232	147	49	136	161568833372043	105839968671369	356766328248321	846328626418596	0.7782	0.878	3091	0.2689	nonDE
105038113	XM_010913809	LOC105038113	sericin 1	protein_coding	XP_010912111.1	.	229	191	210	180	15947958121637	137519959294092	152899854963566	112014082908344	-0.227	0.3596	3803	0.5829	nonDE
105038114	XM_010913806	LOC105038114	transcription factor 25	protein_coding	XP_010912108.1	.	289	333	216	237	201264624329829	239759929031061	157268422248239	147485209162652	0.1136	0.1811	4196	0.7709	nonDE
105038119	XM_029262494	LOC105038119	nicotinamidase 1	protein_coding	XP_029118327.1	.	162	153	41	111	11281961640634	11015996739265	298518764452677	690753511268119	0.7924	0.9172	2839	0.2542	nonDE
105038120	XM_010913815	LOC105038120	probable E3 ubiquitin-protein ligase ARI8	protein_coding	XP_010912117.1	.	156	252	101	224	108641112094994	181439946293776	735375492920009	139395303174828	0.02753	0.02372	3.58	0.9723	nonDE
105038124	XM_010913818	LOC105038124	probable glutathione peroxidase 2	protein_coding	XP_010912120.3	.	115	115	52	77	800879993007969	827999754912073	378609164671688	47917135466347	0.4848	0.5274	2567	0.4448	nonDE
105038129	XM_010913829	LOC105038129	PTI1-like tyrosine-protein kinase 1	protein_coding	XP_010912131.1	.	229	163	181	249	15947958121637	11735996526145	131785113087645	154952814689875	-0.4769	0.8898	3809	0.2645	nonDE
105038135	XM_010913841,XM_010913842,XR_003799763	LOC105038135	phospholipase A(1) LCAT3, transcript variant X2	protein_coding	XP_010912143.1		110	133	68	80	766059123746753	957599716550484	495104292262976	497840368481527	0.3629	0.4165	2713	0.5312	nonDE
105038136	XM_010913844,XM_029262500	LOC105038136	2,3-dimethylmalate lyase, transcript variant X1	protein_coding	XP_010912146.1		286	217	94	74	199175372174156	156239953752974	68440887459882	460502340845413	1.26	2115	3321	0.04874	upReg
105038141	XM_010913856	LOC105038141	B2 protein	protein_coding	XP_010912158.1	.	512	486	912	636	356565701234852	349919896423711	664022227270344	395783092942814	-0.946	2206	5412	0.04355	downReg
105038143	XM_010913855	LOC105038143	CBL-interacting protein kinase 6	protein_coding	XP_010912157.3	.	78	149	141	279	543205560474971	107279968245129	102661331189823	173621828507933	-1244	1712	3341	0.08123	nonDE
105038153	XM_010913862,XM_010913863,XM_010913864,XM_010913865,XM_010913866,XM_019848587	LOC105038153	probable protein phosphatase 2C 11, transcript variant X1	protein_coding	XP_010912164.1		402	351	271	340	279959788860177	252719925194902	197313622357745	211582156604649	-0.03475	0.05493	4545	0.9269	nonDE
105038159	XM_010913871,XR_003799766	LOC105038159	nucleoid-associated protein At2g24020, chloroplastic, transcript variant X1	protein_coding	XP_010912173.1	.	140	133	40	68	97498433931405	957599716550484	291237818978221	423164313209298	0.9695	0.9229	2552	0.2518	nonDE
105038166	XM_010913878,XR_830670,XR_830671	LOC105038166	transmembrane 9 superfamily member 8, transcript variant X2	protein_coding	XP_010912180.1	.	323	264	203	263	224942815427456	190079943736337	147803193131447	163665021138302	-0.003808	0.005168	4167	0.9936	nonDE
105038170	XM_010913881,XM_010913882	LOC105038170	ras-related protein RABB1c, transcript variant X1	protein_coding	XP_010912183.1		307	248	133	193	213800137263867	178559947146256	968365748102586	120103988896168	0.4368	0.8282	3863	0.2868	nonDE
105038171	XM_019848461	LOC105038171	enhancer of mRNA-decapping protein 4	protein_coding	XP_019704020.1	.	695	635	475	366	484010082730903	45719986466884	345844910036638	227761968580299	0.3396	0.7153	5185	0.3364	nonDE
105038179	XM_010913893	LOC105038179	pyruvate kinase 1, cytosolic	protein_coding	XP_010912195.1	.	558	480	556	675	388600900955171	34559989770243	404820568379728	420052810906288	-0.5825	1717	5282	0.08041	nonDE
105038180	XM_010913894	LOC105038180	protein TAB2 homolog, chloroplastic	protein_coding	XP_010912196.1	.	187	118	100	94	130230051036948	849599748518474	728094547445553	584962432965794	0.2917	0.3479	3057	0.5938	nonDE
105038188	XM_010913904,XM_010913905	LOC105038188	phosphatidylinositol-3-phosphatase myotubularin-1, transcript variant X1	protein_coding	XP_010912206.1		150	83	111	119	104462607783648	597599823110452	808184947664564	740537548116272	-0.3661	0.4469	2973	0.5072	nonDE
105038190	XM_019848680	LOC105038190	uncharacterized LOC105038190	protein_coding	XP_019704239.1	.	31	9	154	152	21588938941954	0.647999808192057	112126560306615	945896700114902	-3448	0.9636	1831	0.2374	nonDE
105038201	XM_010913926	LOC105038201	histone deacetylase HDT2	protein_coding	XP_010912228.1	.	276	207	71	82	192211198321913	149039955884173	516947128686343	510286377693565	1303	2165	3227	0.04588	upReg
105038202	XM_029262514,XM_029262515,XM_029262516,XR_003799768	LOC105038202	protein ROS1A-like, transcript variant X4	protein_coding	XP_029118347.1		174	115	194	164	121176625029032	827999754912073	141250342204437	102057275538713	-0.6592	1142	3.46	0.1814	nonDE
105038209	XM_010913935	LOC105038209	2-carboxy-D-arabinitol-1-phosphatase	protein_coding	XP_010912237.1	.	936	619	252	428	651846672569965	445679868078759	183479825956279	266344597137617	0.8627	1847	5111	0.06816	nonDE
105038211	XM_010913937	LOC105038211	fructose-bisphosphate aldolase 1, cytoplasmic	protein_coding	XP_010912239.1	.	524	365	92	191	364922709857544	262799922211223	669846983649909	118859387974965	1353	2434	4059	0.03284	upReg
105038221	XM_010913949,XM_019848662	LOC105038221	protein BUD31 homolog 2, transcript variant X1	protein_coding	XP_010912251.1		216	135	95	191	150426155208453	971999712288085	691689820073275	118859387974965	-0.01904	0.01748	3393	0.9788	nonDE
105038235	XM_010913967,XM_010913969,XM_029262524	LOC105038235	probable sodium/metabolite cotransporter BASS4, chloroplastic, transcript variant X3	protein_coding	XP_010912269.1		162	130	51	78	11281961640634	935999722944082	371328219197232	485394359269489	0.8233	1036	2732	0.2127	nonDE
105038237	XM_010913971	LOC105038237	uncharacterized LOC105038237	protein_coding	XP_010912273.1	.	126	72	70	151	877485905382645	518399846553645	509666183211887	939673695508882	-0.4744	0.4843	2.78	0.4768	nonDE
105038241	XM_010913975	LOC105038241	ACT domain-containing protein ACR12	protein_coding	XP_010912277.1	.	140	104	100	68	97498433931405	748799778355266	728094547445553	423164313209298	0.2449	0.2494	2791	0.6949	nonDE
105038242	XM_010913976,XM_010913977,XM_010913978,XM_010913979,XM_010913980,XM_010913982	LOC105038242	uncharacterized LOC105038242, transcript variant X1	protein_coding	XP_010912278.1		260	300	290	244	181068520158324	215999936064019	21114741875921	151841312386866	-0.2631	0.4561	4237	0.4995	nonDE
105038245	XM_010913984,XM_029262528,XR_003799772,XR_003799773	LOC105038245	transcription factor TGAL5, transcript variant X3	protein_coding	XP_010912286.1		558	460	431	392	388600900955171	331199901964829	313808749949033	243941780555948	-0.03273	0.05183	4979	0.9321	nonDE
105038248	XM_010913989,XM_010913990	LOC105038248	cell division protein FtsZ homolog 2-2, chloroplastic, transcript variant X2	protein_coding	XP_010912291.1		285	215	70	115	198478954788932	154799954179214	509666183211887	715645529692195	1099	1876	3369	0.06564	nonDE
105038252	XM_010913996	LOC105038252	signal recognition particle 54 kDa protein, chloroplastic	protein_coding	XP_010912298.1	.	316	287	223	260	220067893730886	206639938834578	162365084080358	161798119756496	-0.01753	0.02558	4219	0.9705	nonDE
105038253	XM_010913997	LOC105038253	40S ribosomal protein S25	protein_coding	XP_010912299.1	.	209	144	64	149	145551233511883	103679969310729	465980510365154	927227686296844	0.4459	0.5177	3174	0.4519	nonDE
105038259	XM_010914003	LOC105038259	rho GTPase-activating protein 1	protein_coding	XP_010912305.1	.	188	135	201	220	130926468422172	971999712288085	146347004036556	13690610133242	-0.7343	1.53	3664	0.1033	nonDE
105038263	XM_010914009,XM_029263731	LOC105038263	putative aminoacrylate hydrolase RutD, transcript variant X1	protein_coding	XP_010912311.1		28	13	119	169	19499686786281	0.935999722944082	866432511460208	105168777841723	-3185	0.977	1867	0.2321	nonDE
105038265	XM_010914010	LOC105038265	40S ribosomal protein S14	protein_coding	XP_010912312.1	.	209	119	59	152	145551233511883	856799746387275	429575782992876	945896700114902	0.3495	0.3291	3083	0.6125	nonDE
105038292	XM_010914056,XM_019853611,XM_029263748,XR_002165703	LOC105038292	uncharacterized LOC105038292, transcript variant X3	protein_coding	XP_010912358.1		467	443	287	293	325226918899758	318959905587868	208963135116874	182334034956359	0.3123	0.7137	4.65	0.3371	nonDE
105038310	XM_010914074	LOC105038310	two-component response regulator-like APRR3	protein_coding	XP_010912376.1	.	1088	846	658	817	757702115124061	609119819700533	479086212219174	50841947631176	0.0472	0.08394	5856	0.8915	nonDE
105038316	XM_010914080	LOC105038316	digalactosyldiacylglycerol synthase 1, chloroplastic	protein_coding	XP_010912382.1	.	99	46	118	135	689453211372078	331199901964829	859151565985753	840105621812577	-1205	1576	2.68	0.0982	nonDE
105038319	XM_019848449,XM_019848450,XM_029262548	LOC105038319	BEL1-like homeodomain protein 1, transcript variant X3	protein_coding	XP_019704008.1		268	189	145	123	186639859240118	136079959720332	105573709379605	765429566540348	0.4274	0.6874	3586	0.3487	nonDE
105038321	XM_010914088,XM_010914089,XR_003799788	LOC105038321	uncharacterized LOC105038321, transcript variant X2	protein_coding	XP_010912390.1		233	262	192	161	162265250757267	188639944162577	139794153109546	100190374156907	0.1565	0.2275	3.85	0.719	nonDE
105038328	XM_010914097,XM_010914098	LOC105038328	PH, RCC1 and FYVE domains-containing protein 1, transcript variant X1	protein_coding	XP_010912399.1		490	414	416	773	341244518759917	298079911768346	30288733173735	481038256045276	-0.6767	1452	5126	0.1163	nonDE
105038335	XM_010914104	LOC105038335	actin-101	protein_coding	XP_010912406.1	.	542	541	297	421	377458222791582	389519884702114	216244080591329	261988493913404	0.2692	0.5883	4919	0.4031	nonDE
105038342	XM_010914113,XM_010914116	LOC105038342	exocyst complex component SEC5B, transcript variant X1	protein_coding	XP_010912415.1		105	139	213	214	731238254485537	100079970376329	155084138605903	133172298568809	-1162	2318	3476	0.03751	downReg
105038343	XM_010914118,XM_010914127,XM_010914137,XM_029263768	LOC105038343	protein PLASTID TRANSCRIPTIONALLY ACTIVE 7, transcript variant X1	protein_coding	XP_010912420.1		518	458	142	291	360744205546198	329759902391069	103389425737269	181089434035155	0.906	1827	4444	0.0702	nonDE
105038350	XM_010914132,XM_010914133,XM_010914134,XM_010914136,XR_003799794	LOC105038350	protein FAM135B, transcript variant X4	protein_coding	XP_010912434.1		165	151	62	68	114908868562013	10871996781889	451418619416243	423164313209298	0.9397	1344	2813	0.1351	nonDE
105038358	XM_010914145	LOC105038358	60S ribosomal protein L3	protein_coding	XP_010912447.1	.	168	139	76	85	116998120717686	100079970376329	55335185605862	528955391511623	0.5864	0.8635	2943	0.2747	nonDE
105038362	XM_010914154,XM_019854472	LOC105038362	importin subunit beta-1, transcript variant X1	protein_coding	XP_010912456.1		515	641	476	531	358654953390525	46151986339012	346573004584083	330441544579614	-0.1481	0.2838	5215	0.6592	nonDE
105038368	XM_010914157,XM_029262557	LOC105038368	40S ribosomal protein S10-1, transcript variant X1	protein_coding	XP_010912459.1		199	142	68	147	13858705965964	102239969736969	495104292262976	914781677084806	0.3716	0.4355	3168	0.5172	nonDE
105038382	XM_010914175,XM_019848677,XR_830722	LOC105038382	long chain acyl-CoA synthetase 9, chloroplastic, transcript variant X3	protein_coding	XP_010912477.1		483	560	322	481	336369597063347	403199880652835	234446444277468	299326521549518	0.05525	0.08536	4967	0.8898	nonDE
105038387	XM_010914180,XM_010914181,XM_010914182	LOC105038387	CBS domain-containing protein CBSCBSPB3, transcript variant X2	protein_coding	XP_010912482.1		212	169	165	218	147640485667556	121679963982731	120135600328516	135661500411216	-0.3442	0.6169	3713	0.3851	nonDE
105038393	XM_010914191	LOC105038393	fructose-bisphosphate aldolase, chloroplastic	protein_coding	XP_010912493.1	.	9377	6341	2165	3918	653030582124846	456551864860648	157632469521962	243817320463828	1073	1952	8354	0.05902	nonDE
105038412	XM_010914220	LOC105038412	transmembrane 9 superfamily member 1	protein_coding	XP_010912522.1	.	126	261	288	187	877485905382645	187919944375696	209691229664319	116370186132557	-0.688	0.8657	3828	0.2741	nonDE
105038424	XM_010914235,XM_029262565,XR_002164042,XR_003799797	LOC105038424	ABC transporter D family member 1, transcript variant X4	protein_coding	XP_010912537.1		571	668	394	452	397654326963087	480959857635882	286869251693548	281279808192063	0.2083	0.4428	5141	0.5109	nonDE
105038426	XM_010914237	LOC105038426	SWI/SNF complex subunit SWI3C	protein_coding	XP_010912539.1	.	134	88	103	48	93319929620059	633599812454456	74993738386892	298704221088916	0.3649	0.3091	2602	0.6338	nonDE
105038428	XM_010914239,XM_010914240	LOC105038428	NAC domain-containing protein 48, transcript variant X2	protein_coding	XP_010912541.1		220	122	125	269	153211824749351	878399739993677	910118184306941	167398823901914	-0.5109	0.635	3585	0.3757	nonDE
105038431	XM_010914243	LOC105038431	isocitrate dehydrogenase [NAD] catalytic subunit 5, mitochondrial	protein_coding	XP_010912545.1	.	112	149	108	135	77998747145124	107279968245129	786342111241197	840105621812577	-0.2542	0.3319	3114	0.6098	nonDE
105038457	XM_010914269	LOC105038457	malate dehydrogenase, mitochondrial	protein_coding	XP_010912571.1	.	197	175	96	207	137194224889191	125999962704011	698970765547731	128816195344595	0.03031	0.03012	3486	0.9646	nonDE
105038463	XM_010914305	LOC105038463	N-terminal acetyltransferase A complex auxiliary subunit NAA15	protein_coding	XP_010912607.1	.	561	513	404	406	390690153110844	369359890669472	294150197168003	252653987004375	0.06828	0.1237	5.01	0.8408	nonDE
105038468	XM_010914274	LOC105038468	dihydrolipoyllysine-residue acetyltransferase component 5 of pyruvate dehydrogenase complex, chloroplastic	protein_coding	XP_010912576.1	.	196	124	45	0	136497807503967	892799735731278	327642546350499	0	4702	0.6516	0.9151	0.3677	nonDE
105038476	XM_010914283	LOC105038476	GDSL esterase/lipase At1g31550	protein_coding	XP_010912585.1	.	103	182	143	219	717309906781051	131039961212171	104117520284714	136283800871818	-0.7277	1101	3431	0.1918	nonDE
105038477	XM_010914280	LOC105038477	TOM1-like protein 4	protein_coding	XP_010912582.1	.	206	207	127	142	14346198135621	149039955884173	924680075255852	883666654054711	0.2795	0.4654	3528	0.4929	nonDE
105038493	XM_010914312,XM_010914313	LOC105038493	mitogen-activated protein kinase kinase kinase 3, transcript variant X2	protein_coding	XP_010912614.1		952	743	515	590	662989350733554	534959841651887	37496869193446	367157271755126	0.2697	0.6464	5556	0.3705	nonDE
105038496	gene-LOC105038496	LOC105038496	.	pseudogene	.	.	252	168	163	174	175497181076529	120959964195851	118679411233625	108280280144732	-0.04605	0.05617	3688	0.9261	nonDE
105038499	XM_010914321	LOC105038499	GDP-L-galactose phosphorylase 1	protein_coding	XP_010912623.1	.	239	209	82	156	166443755068613	150479955457933	597037528905354	970788718538978	0.6119	0.9925	3461	0.2264	nonDE
105038500	XM_010914323	LOC105038500	phosphatidylinositol 4-kinase beta 1	protein_coding	XP_010912625.1	.	181	205	158	132	126051546725602	147599956310413	115038938496397	82143660799452	0.08535	0.1068	3.53	0.8615	nonDE
105038501	XM_010914324,XR_003799804,XR_003799805	LOC105038501	probable inactive ATP-dependent zinc metalloprotease FTSHI 4, chloroplastic, transcript variant X3	protein_coding	XP_010912626.1	.	329	309	114	83	229121319738802	222479934145939	830027784087931	516509382299584	1395	2638	3609	0.02492	upReg
105038505	XM_010914328	LOC105038505	alcohol dehydrogenase 1	protein_coding	XP_010912630.1	.	318	132	20	32	221460728501334	950399718681683	145618909489111	199136147392611	2632	0.6644	2.33	0.3616	nonDE
105038509	XM_010914333,XM_029262572	LOC105038509	DAG protein, chloroplastic, transcript variant X2	protein_coding	XP_010912635.1		203	267	58	202	141372729200537	192239943096977	422294837518421	125704693041586	0.6937	0.7524	3.46	0.319	nonDE
105038510	XM_010914334,XM_019848671,XM_029262573,XM_029262574	LOC105038510	uncharacterized protein At4g06598, transcript variant X2	protein_coding	XP_010912636.1		231	457	328	525	160872415986818	329039902604189	238815011562141	326707741816002	-0.7064	1111	4666	0.189	nonDE
105038513	XM_010914339	LOC105038513	DNA mismatch repair protein MLH1	protein_coding	XP_010912641.1	.	155	159	151	169	10794469470977	11447996611393	109942276664279	105168777841723	-0.3652	0.6522	3455	0.3675	nonDE
105038515	XM_029262575	LOC105038515	receptor protein-tyrosine kinase CEPR2	protein_coding	XP_029118408.1	.	190	239	76	64	132319303192621	172079949064335	55335185605862	398272294785222	1288	1905	3.08	0.06303	nonDE
105038520	XM_019848517,XM_029262577	LOC105038520	MACPF domain-containing protein At4g24290, transcript variant X2	protein_coding	XP_019704076.1		128	79	93	179	891414253087131	56879983163525	677127929124364	111391782447742	-0.7118	0.93	2982	0.2484	nonDE
105038524	XM_019848770	LOC105038524	immune-associated nucleotide-binding protein 9	protein_coding	XP_019704329.1	.	132	189	71	19	919270948496104	136079959720332	516947128686343	118237087514363	1892	0.9516	2409	0.2412	nonDE
105038525	XM_010914355,XM_010914356,XM_019848554,XR_003799806	LOC105038525	cullin-associated NEDD8-dissociated protein 1, transcript variant X1	protein_coding	XP_010912657.1		547	496	342	302	380940309717704	357119894292511	249008335226379	187934739101776	0.3633	0.8315	4822	0.2856	nonDE
105038527	XM_010914359,XM_010914360	LOC105038527	protein SUPPRESSOR OF GENE SILENCING 3 homolog, transcript variant X2	protein_coding	XP_010912661.1		110	123	69	94	766059123746753	885599737862478	502385237737432	584962432965794	0.1723	0.18	2748	0.772	nonDE
105038529	XM_010914365	LOC105038529	cleft lip and palate transmembrane protein 1 homolog	protein_coding	XP_010912667.1	.	432	382	581	472	300852310416907	275039918588184	423022932065866	293725817404101	-0.6995	1753	4994	0.07647	nonDE
105038535	XM_010914373,XM_010914374,XM_019848681,XM_019848682	LOC105038535	zinc finger CCCH domain-containing protein 16, transcript variant X2	protein_coding	XP_010912675.1		115	138	107	103	800879993007969	993599705894487	779061165766742	640969474419966	-0.07274	0.07779	2995	0.8995	nonDE
105038542	XM_010914384	LOC105038542	far upstream element-binding protein 1	protein_coding	XP_010912686.1	.	460	446	136	317	320351997203188	321119904948508	990208584525952	197269246010805	0.7669	1354	4407	0.1329	nonDE
105038545	XM_010914386	LOC105038545	uncharacterized LOC105038545	protein_coding	XP_010912688.1	.	135	192	136	121	940163470052834	138239959080972	990208584525952	75298355732831	-0.006125	0.006197	3316	0.993	nonDE
105038569	XM_010914419	LOC105038569	22.7 kDa class IV heat shock protein	protein_coding	XP_010912721.1	.	208	162	0	0	144854816126659	11663996547457	0	0	8187	1538	-0.5944	0.1022	nonDE
105038571	XM_010914457	LOC105038571	protein FAR1-RELATED SEQUENCE 11	protein_coding	XP_010912759.1	.	154	120	110	89	107248277324545	863999744256076	800904002190108	553847409935699	0.1409	0.1555	3008	0.8003	nonDE
105038581	XM_010914430	LOC105038581	probable phosphoribosylformylglycinamidine synthase, chloroplastic/mitochondrial	protein_coding	XP_010912732.1	.	675	555	360	329	470081735026417	399599881718435	262114037080399	204736851538028	0.4961	1243	4987	0.1561	nonDE
105038584	XM_010914432	LOC105038584	ankyrin repeat protein SKIP35	protein_coding	XP_010912734.1	.	109	131	138	62	75909494989451	943199720812883	100477047547486	385826285573184	0.07988	0.06178	2867	0.919	nonDE
105038586	XM_010914433	LOC105038586	transducin beta-like protein 3	protein_coding	XP_010912735.1	.	147	123	79	68	102373355627975	885599737862478	575194692481987	423164313209298	0.5527	0.721	2785	0.3332	nonDE
105038593	XM_010914442	LOC105038593	la-related protein 6B	protein_coding	XP_010912744.1	.	76	115	239	248	529277212770484	827999754912073	174014596839487	154330514229273	-1725	3066	3386	0.01524	downReg
105038596	XM_010914446	LOC105038596	uncharacterized LOC105038596	protein_coding	XP_010912748.1	.	195	171	79	170	135801390118743	123119963556491	575194692481987	105791078302325	0.2802	0.3408	3333	0.6008	nonDE
105038597	XM_010914447	LOC105038597	FRIGIDA-like protein 3	protein_coding	XP_010912749.1	.	1502	1345	1646	2357	104601891260693	968399713353685	119844362509538	14667621856387	-0.8055	2208	6852	0.04352	downReg
105038599	XM_029262594	LOC105038599	2-alkenal reductase (NADP(+)-dependent)	protein_coding	XP_029118427.1	.	312	92	684	876	217282224189988	662399803929658	498016670452758	545135203487272	-2513	3547	4647	0.009168	downReg
105038601	XM_010914451,XM_010914452,XM_010914453,XM_029262596	LOC105038601	mitochondrial proton/calcium exchanger protein, transcript variant X3	protein_coding	XP_010912753.1		359	331	203	259	250013841295531	238319929457301	147803193131447	161175819295894	0.245	0.4805	4281	0.4801	nonDE
105038603	XM_010914455,XM_029262597	LOC105038603	probable V-type proton ATPase subunit H, transcript variant X1	protein_coding	XP_010912757.1		260	175	147	208	181068520158324	125999962704011	107029898474496	129438495805197	-0.05621	0.06817	3741	0.9111	nonDE
105038604	XM_010914459,XM_010914460,XM_029262598	LOC105038604	protein FAR1-RELATED SEQUENCE 6, transcript variant X2	protein_coding	XP_010912761.1		251	233	209	257	174800763691305	167759950343055	152171760416121	159931218374691	-0.28	0.5381	4034	0.4371	nonDE
105038607	XM_010914464	LOC105038607	60S ribosomal protein L5	protein_coding	XP_010912766.1	.	181	225	81	107	126051546725602	161999952048014	589756583430898	665861492844043	0.7605	1257	3248	0.1528	nonDE
105038611	XM_010914468	LOC105038611	small G protein signaling modulator 1	protein_coding	XP_010912770.1	.	88	104	238	159	612847298997403	748799778355266	173286502292042	989457732357035	-1353	2098	3241	0.04994	downReg
105038617	XM_010914475,XM_010914477,XM_019848589,XR_002164040,XR_002164041	LOC105038617	putative RNA-binding protein Luc7-like 2, transcript variant X4	protein_coding	XP_010912777.1		348	310	216	148	242353250058064	22319993393282	157268422248239	921004681690825	0.5499	1017	4068	0.2185	nonDE
105038623	XM_019848742	LOC105038623	eukaryotic translation initiation factor 2A	protein_coding	XP_019704301.1	.	360	253	220	245	250710258680756	182159946080656	160180800438022	152463612847468	0.04262	0.05823	4195	0.9238	nonDE
105038626	XM_029262603,XM_029262604,XM_029262605,XM_029262606,XM_029262607	LOC105038626	eIF-2-alpha kinase GCN2, transcript variant X3	protein_coding	XP_029118436.1		325	199	160	160	226335650197904	143279957589133	116495127591289	995680736963054	0.3368	0.5145	3803	0.4544	nonDE
105038628	XM_010914492,XM_010914493	LOC105038628	transcription factor IIIB 60 kDa subunit, transcript variant X1	protein_coding	XP_010912794.1		158	218	182	185	110033946865443	156959953539854	132513207635091	115125585211353	-0.3238	0.5171	3675	0.4521	nonDE
105038632	XM_010914497,XM_010914498	LOC105038632	probable E3 ubiquitin-protein ligase ARI8, transcript variant X1	protein_coding	XP_010912799.1		340	253	169	212	236781910976269	182159946080656	123047978518298	131927697647605	0.2918	0.5228	4027	0.4484	nonDE
105038650	XM_010914519	LOC105038650	adenylylsulfatase HINT3	protein_coding	XP_010912821.3	.	133	117	190	220	926235122348347	842399750649674	138337964014655	13690610133242	-1049	2257	3467	0.04103	downReg
105038658	XM_010914533	LOC105038658	argininosuccinate synthase, chloroplastic	protein_coding	XP_010912835.1	.	155	286	234	421	10794469470977	205919939047698	170374124102259	261988493913404	-0.9335	1482	4153	0.1113	nonDE
105038664	XM_010914538,XM_029262611,XM_029262612,XM_029262614,XM_029262615,XM_029262616,XM_029262617,XM_029262618,XM_029262619	LOC105038664	cyclin-dependent kinase G-2, transcript variant X5	protein_coding	XP_010912840.1		677	1045	1868	1965	471474569796865	752399777289666	136008061462829	122282040508275	-1529	3404	6454	0.01031	downReg
105038680	XM_010914557,XM_010914558	LOC105038680	glucose-6-phosphate 1-dehydrogenase, cytoplasmic isoform, transcript variant X2	protein_coding	XP_010912859.1		141	113	191	223	981948513166293	813599759174471	139066058562101	138773002714226	-1044	2221	3483	0.0427	downReg
105038681	XM_010914559,XM_010914560	LOC105038681	AUGMIN subunit 6, transcript variant X1	protein_coding	XP_010912861.1		365	273	266	358	254192345606877	196559941818257	193673149620517	222783564895483	-0.3091	0.6105	4432	0.3883	nonDE
105038693	XM_019848435	LOC105038693	auxin response factor 7	protein_coding	XP_019703994.1	.	441	385	487	398	307120066883926	277199917948824	354582044605984	24767558331956	-0.4279	0.9602	4.88	0.2385	nonDE
105038721	XM_019847934	LOC105038721	protein transport protein Sec61 subunit alpha	protein_coding	XP_019703493.1	.	149	156	187	187	103766190398424	11231996675329	136153680372318	116370186132557	-0.6318	1301	3547	0.1435	nonDE
105038724	XM_010914588	LOC105038724	cytochrome P450 71A9	protein_coding	XP_010912890.1	.	271	218	402	663	188729111395791	156959953539854	292694008073112	412585205379066	-1429	3202	4614	0.01308	downReg
105038726	XM_010914589	LOC105038726	26S proteasome non-ATPase regulatory subunit 6	protein_coding	XP_010912891.1	.	128	183	131	259	891414253087131	131759960999052	953803857153675	161175819295894	-0.6263	0.9145	3.54	0.2555	nonDE
105038727	XM_010914590	LOC105038727	telomere length regulation protein TEL2 homolog	protein_coding	XP_010912892.1	.	169	143	103	127	11769453810291	102959969523849	74993738386892	790321584964424	0.09879	0.1221	3208	0.8436	nonDE
105038734	XM_010914603	LOC105038734	very-long-chain 3-oxoacyl-CoA reductase 1	protein_coding	XP_010912905.2	.	103	69	54	159	717309906781051	496799852947244	393171055620599	989457732357035	-0.5258	0.4595	2618	0.4965	nonDE
105038736	XM_010914606	LOC105038736	pentatricopeptide repeat-containing protein At3g46610	protein_coding	XP_010912908.1	.	99	117	105	73	689453211372078	842399750649674	764499274817831	454279336239393	-0.01726	0.0146	2752	0.9832	nonDE
105038739	XM_010914611	LOC105038739	protein RETICULATA-RELATED 1, chloroplastic	protein_coding	XP_010912913.1	.	220	216	136	99	153211824749351	155519953966094	990208584525952	61607745599589	0.5907	0.9991	3462	0.2246	nonDE
105038740	XM_010914612,XM_029262630	LOC105038740	protein IN CHLOROPLAST ATPASE BIOGENESIS, chloroplastic, transcript variant X2	protein_coding	XP_010912914.1		840	662	179	241	58499060358843	476639858914602	130328923992754	14997441100506	1499	3672	4766	0.008118	upReg
105038742	XM_010914613,XM_019848653,XM_029262631,XM_029262632	LOC105038742	ultraviolet-B receptor UVR8, transcript variant X4	protein_coding	XP_010912915.1		221	407	139	145	153908242134575	293039913260186	101205142094932	902335667872768	0.7318	1086	3836	0.197	nonDE
105038743	XM_010914616	LOC105038743	pentatricopeptide repeat-containing protein At5g50280, chloroplastic	protein_coding	XP_010912918.2	.	259	245	102	90	180372102773099	176399947785615	742656438394464	560070414541718	1066	2042	3428	0.05387	nonDE
105038745	XM_010914620,XR_830781	LOC105038745	actin-related protein 3, transcript variant X1	protein_coding	XP_010912922.1	.	43	67	123	122	299459475646458	482399857209642	89555629335803	759206561934329	-1552	1.65	2495	0.08858	nonDE
105038750	XM_010914626,XM_010914627	LOC105038750	alpha/beta hydrolase domain-containing protein 17B, transcript variant X1	protein_coding	XP_010912928.1		131	215	113	148	912306774643861	154799954179214	822746838613475	921004681690825	0.02171	0.02111	3351	0.9746	nonDE
105038752	XM_029262633,XM_029262634,XM_029262635	LOC105038752	regulator of nonsense transcripts UPF2, transcript variant X3	protein_coding	XP_029118466.1		240	246	150	95	167140172453837	177119947572496	109214182116833	591185437571813	0.712	1185	3.56	0.1699	nonDE
105038755	XM_010914637,XM_029262637,XM_029262638,XM_029262639,XR_003799831,XR_003799832,XR_003799833	LOC105038755	E3 ubiquitin-protein ligase RGLG1, transcript variant X2	protein_coding	XP_010912939.1		105	100	163	245	731238254485537	719999786880063	118679411233625	152463612847468	-1306	2451	3.31	0.03191	downReg
105038757	XM_010914638,XM_010914639,XM_019848490,XM_019848491,XM_019848492,XM_029262642,XM_029262643,XM_029262644,XM_029262645	LOC105038757	serine/threonine-protein kinase AFC1, transcript variant X5	protein_coding	XP_010912940.1		261	255	243	238	181764937543548	183599945654416	176926975029269	148107509623254	-0.2348	0.4324	4107	0.519	nonDE
105038767	XM_010914655	LOC105038767	elongation factor TuA, chloroplastic	protein_coding	XP_010912957.2	.	508	412	160	96	353780031693955	296639912194586	116495127591289	597408442177833	1573	2926	4043	0.01795	upReg
105038775	XM_010914668,XM_010914669	LOC105038775	beta-1,4-mannosyl-glycoprotein 4-beta-N-acetylglucosaminyltransferase, transcript variant X1	protein_coding	XP_010912970.1		172	201	200	335	119783790258583	144719957162893	145618909489111	208470654301639	-0.8289	1654	3924	0.08805	nonDE
105038783	XM_010914684	LOC105038783	protein NBR1 homolog	protein_coding	XP_010912986.1	.	506	498	289	427	352387196923506	358559893866271	210419324211765	265722296677015	0.1684	0.3182	4859	0.6244	nonDE
105038786	XM_010914689	LOC105038786	CRM-domain containing factor CFM3, chloroplastic/mitochondrial	protein_coding	XP_010912991.2	.	152	188	95	77	105855442554097	135359959933452	691689820073275	47917135466347	0.6575	0.954	3.06	0.2408	nonDE
105038789	XM_010914690,XM_010914691	LOC105038789	general negative regulator of transcription subunit 3, transcript variant X1	protein_coding	XP_010912992.1		348	339	247	389	242353250058064	244079927752341	179839353219052	242074879174143	-0.2012	0.3543	4496	0.5876	nonDE
105038792	XM_010914695	LOC105038792	photosynthetic NDH subunit of lumenal location 5, chloroplastic	protein_coding	XP_010912997.1	.	444	260	138	193	309209319039599	187199944588816	100477047547486	120103988896168	0.7147	1.27	4026	0.1506	nonDE
105038802	XM_010914705	LOC105038802	acetolactate synthase 1, chloroplastic	protein_coding	XP_010913007.1	.	173	208	65	85	120480207643808	149759955671053	47326145583961	528955391511623	0.9946	1541	3042	0.102	nonDE
105038805	XM_010914709	LOC105038805	uncharacterized LOC105038805	protein_coding	XP_010913011.1	.	196	224	289	206	136497807503967	161279952261134	210419324211765	128193894883993	-0.5478	0.9649	3968	0.2368	nonDE
105038832	XM_010914739,XM_029262656,XM_029262657	LOC105038832	violaxanthin de-epoxidase, chloroplastic, transcript variant X1	protein_coding	XP_010913041.1		503	603	190	173	350297944767834	434159871488678	138337964014655	10765797968413	1265	2.97	4.45	0.0172	upReg
105038843	XM_010914756,XM_010914757	LOC105038843	eukaryotic translation initiation factor 3 subunit H, transcript variant X2	protein_coding	XP_010913058.1		295	349	164	209	205443128641175	251279925621142	119407505781071	130060796265799	0.4471	0.9124	4076	0.2559	nonDE
105038844	XM_010914758	LOC105038844	photosystem I reaction center subunit XI, chloroplastic	protein_coding	XP_010913060.1	.	916	699	669	919	637918324865478	503279851029164	487095252241075	571894123293154	-0.3108	0.7294	5774	0.3296	nonDE
105038864	XM_010914782,XM_029262665	LOC105038864	galacturonosyltransferase 8, transcript variant X2	protein_coding	XP_010913084.1		117	164	118	103	814808340712456	11807996504833	859151565985753	640969474419966	-0.003452	0.003285	3099	0.9962	nonDE
105038866	XM_010914784	LOC105038866	ras GTPase-activating protein-binding protein 1	protein_coding	XP_010913086.1	.	167	163	212	208	116301703332462	11735996526145	154356044058457	129438495805197	-0.6835	1484	3688	0.1113	nonDE
105038874	XM_010914791	LOC105038874	serine hydroxymethyltransferase 4	protein_coding	XP_010913093.1	.	174	215	238	107	121176625029032	154799954179214	173286502292042	665861492844043	-0.03494	0.02875	3605	0.9666	nonDE
105038875	XM_010914793	LOC105038875	adenosylhomocysteinase	protein_coding	XP_010913095.1	.	509	648	489	700	354476449079179	466559861898281	356038233700875	435610322421336	-0.3705	0.8148	5324	0.2929	nonDE
105038885	XM_010914805,XR_830802,XR_830803	LOC105038885	probable UDP-N-acetylglucosamine--peptide N-acetylglucosaminyltransferase SEC, transcript variant X2	protein_coding	XP_010913107.1	.	193	126	159	177	134408555348294	90719973146888	115767033043843	110147181526538	-0.4383	0.7359	3486	0.3265	nonDE
105038904	XM_010914819,XM_010914820,XM_010914821,XR_830804	LOC105038904	probable sodium/metabolite cotransporter BASS3, chloroplastic, transcript variant X4	protein_coding	XP_010913121.1		339	219	95	76	236085493591045	157679953326734	691689820073275	472948350057451	1363	2149	3399	0.04656	upReg
105038919	XM_010914839	LOC105038919	zinc finger A20 and AN1 domain-containing stress-associated protein 8	protein_coding	XP_010913141.1	.	120	110	71	58	835700862269185	791999765568069	516947128686343	360934267149107	0.532	0.5989	2576	0.3955	nonDE
105038925	XM_010914851,XM_010914852,XM_010914853,XM_010914855,XM_029262708,XR_003799869,XR_003799870,XR_830809,XR_830810,XR_830811	LOC105038925	E3 ubiquitin-protein ligase makorin, transcript variant X3	protein_coding	XP_010913153.1		196	177	131	140	136497807503967	127439962277771	953803857153675	871220644842673	0.122	0.1707	3459	0.7831	nonDE
105038927	XM_019848423,XM_029262706,XM_029262707	LOC105038927	carboxyl-terminal-processing peptidase 3, chloroplastic, transcript variant X2	protein_coding	XP_019703982.1		1178	1206	195	585	82037967979425	868319742977356	141978436751883	364045769452117	1454	2335	5455	0.03674	upReg
105038931	XM_010914865	LOC105038931	protein FAR1-RELATED SEQUENCE 6	protein_coding	XP_010913167.1	.	126	194	124	80	877485905382645	139679958654732	902837238832486	497840368481527	0.3352	0.3594	3113	0.5831	nonDE
105038938	XM_010914869,XM_019848696	LOC105038938	threonine--tRNA ligase, chloroplastic/mitochondrial 2, transcript variant X2	protein_coding	XP_010913171.1		929	935	512	669	646971750873394	673199800732859	372784408292123	416319008142677	0.3297	0.8654	5673	0.2741	nonDE
105038950	XM_010914887,XR_002163790,XR_830814,XR_830815	LOC105038950	U4/U6.U5 tri-snRNP-associated protein 2, transcript variant X2	protein_coding	XP_010913189.1	.	531	541	323	263	369797631554115	389519884702114	235174538824914	163665021138302	0.548	1.29	4772	0.1457	nonDE
105038953	XM_010914890,XM_010914891	LOC105038953	fimbrin-4, transcript variant X2	protein_coding	XP_010913192.1		180	213	135	115	125355129340378	153359954605453	982927639051497	715645529692195	0.3226	0.484	3436	0.477	nonDE
105038960	XM_010914903,XM_010914904	LOC105038960	uncharacterized LOC105038960, transcript variant X2	protein_coding	XP_010913205.1		186	147	117	201	129533633651724	105839968671369	851870620511297	125082392580984	-0.244	0.3346	3463	0.6071	nonDE
105038962	XM_010914907	LOC105038962	putative BPI/LBP family protein At1g04970	protein_coding	XP_010913209.1	.	90	89	111	150	626775646701889	640799810323256	808184947664564	933450690902863	-0.8744	1444	2898	0.1181	nonDE
105038969	XM_010914918	LOC105038969	trigger factor-like protein TIG, Chloroplastic	protein_coding	XP_010913220.1	.	241	141	30	53	167836589839061	101519969950089	218428364233666	329819244119012	1809	1014	2577	0.2194	nonDE
105038974	XM_010914921	LOC105038974	heat shock protein 81-1	protein_coding	XP_010913223.1	.	1074	1317	319	490	747952271730921	948239719321043	232262160635131	304927225694935	1243	3097	5566	0.01462	upReg
105038975	XM_010914922	LOC105038975	heat shock protein 81-1-like	protein_coding	XP_010913224.1	.	1007	1028	301	560	701292306920892	740159780912705	219156458781111	348488257937069	0.9591	2249	5481	0.04133	upReg
105038980	XM_010914926,XM_010914927,XM_029262695	LOC105038980	MLO-like protein 13, transcript variant X1	protein_coding	XP_010913228.1		227	169	158	255	158086746445921	121679963982731	115038938496397	158686617453487	-0.3805	0.6272	3779	0.3796	nonDE
105038981	XM_010914934	LOC105038981	ketol-acid reductoisomerase, chloroplastic	protein_coding	XP_010913236.1	.	1679	1398	1514	2286	116928478979164	100655970205833	110233514483257	142257885293596	-0.6146	1538	6865	0.1022	nonDE
105038985	XM_010914938	LOC105038985	probable protein phosphatase 2C 66	protein_coding	XP_010913240.1	.	129	126	211	162	898378426939374	90719973146888	153627949511012	100812674617509	-0.8651	1592	3411	0.09636	nonDE
105038988	XM_010914941	LOC105038988	peroxisome biogenesis protein 5	protein_coding	XP_010913243.1	.	563	718	573	898	392082987881293	516959846979885	417198175686302	558825813620514	-0.517	1172	5544	0.1731	nonDE
105038989	XM_010914945	LOC105038989	SCY1-like protein 2	protein_coding	XP_010913247.1	.	180	132	200	145	125355129340378	950399718681683	145618909489111	902335667872768	-0.4656	0.7168	3488	0.3357	nonDE
105038993	XM_010914947,XM_010914948,XM_010914949,XM_010914950,XM_029262689	LOC105038993	probable WRKY transcription factor 2, transcript variant X1	protein_coding	XP_010913249.1		228	295	190	341	158783163831145	212399937129619	138337964014655	212204457065251	-0.3294	0.5026	4152	0.4631	nonDE
105038994	XM_010914951,XM_029262688,XR_830824,XR_830825	LOC105038994	chloride channel protein CLC-f, transcript variant X1	protein_coding	XP_010913253.1		137	150	119	128	95409181775732	107999968032009	866432511460208	796544589570443	-0.1239	0.1587	3204	0.7968	nonDE
105038998	XM_010914955,XM_010914957	LOC105038998	uncharacterized LOC105038998, transcript variant X1	protein_coding	XP_010913257.1		335	275	217	222	233299824050148	197999941392017	157996516795685	138150702253624	0.1316	0.2153	4158	0.7308	nonDE
105039005	XM_010914967,XM_019848654,XM_019848655	LOC105039005	ubiquitin-conjugating enzyme E2-17 kDa, transcript variant X3	protein_coding	XP_010913269.1		242	276	103	371	168533007224286	198719941178897	74993738386892	230873470883308	0.03382	0.02511	3959	0.9706	nonDE
105039006	XM_010914968	LOC105039006	uncharacterized WD repeat-containing protein C2A9.03	protein_coding	XP_010913270.1	.	484	512	407	557	337066014448571	368639890882592	29633448081034	346621356555263	-0.2796	0.6377	5072	0.3745	nonDE
105039009	XM_010914971,XM_029262683	LOC105039009	ubiquitin-conjugating enzyme E2-17 kDa, transcript variant X1	protein_coding	XP_010913273.1		315	253	117	294	219371476345661	182159946080656	851870620511297	182956335416961	0.2479	0.287	3985	0.6558	nonDE
105039012	XM_010914977,XR_002164005,XR_002164006	LOC105039012	proteasome activator subunit 4, transcript variant X3	protein_coding	XP_010913279.1	.	85	64	114	175	591954777440673	46079986360324	830027784087931	108902580605334	-1278	1923	2824	0.06124	nonDE
105039015	NM_001303591	IAA1	auxin-responsive protein IAA1	protein_coding	NP_001290520.1	.	59	41	116	179	410886257282349	295199912620826	844589675036842	111391782447742	-1871	1687	2549	0.08437	nonDE
105039053	XM_010915029,XM_010915030,XM_019848459	LOC105039053	probable sucrose-phosphate synthase 1, transcript variant X2	protein_coding	XP_010913331.1		76	77	99	124	529277212770484	554399835897649	720813601971098	771652571146367	-0.8784	1303	2676	0.1435	nonDE
105039060	XM_010915042	LOC105039060	uncharacterized LOC105039060	protein_coding	XP_010913344.1	.	236	245	285	288	16435450291294	176399947785615	207506946021983	17922253265335	-0.5892	1395	4182	0.1265	nonDE
105039062	XM_010915041	LOC105039062	pyrophosphate-energized vacuolar membrane proton pump	protein_coding	XP_010913343.1	.	400	432	1259	703	278566954089728	311039907932187	916671035233951	437477223803142	-1.52	2828	5433	0.01988	downReg
105039064	XM_010915046,XM_010915047,XM_029262718	LOC105039064	probable anion transporter 6, chloroplastic, transcript variant X3	protein_coding	XP_010913348.1		211	214	196	213	146944068282332	154079954392333	142706531299328	132549998108207	-0.2827	0.5223	3.85	0.4485	nonDE
105039067	XM_010915054,XM_010915063	LOC105039067	CTP synthase, transcript variant X2	protein_coding	XP_010913356.1		73	150	309	81	508384691213754	107999968032009	224981215160676	504063373087546	-0.9031	0.6408	3158	0.3724	nonDE
105039069	XM_010915053,XM_029262719	LOC105039069	protein PHOX1, transcript variant X2	protein_coding	XP_010913355.1		410	616	1086	1000	285531127941972	443519868718119	790710678525871	622300460601909	-1396	3249	5644	0.01238	downReg
105039073	XM_010915062	LOC105039073	threonine--tRNA ligase, mitochondrial 1	protein_coding	XP_010913364.1	.	526	574	343	246	366315544627993	413279877669156	249736429773825	15308591330807	0.5923	1261	4788	0.1525	nonDE
105039074	XM_010915064	LOC105039074	ubiquitin-like domain-containing protein CIP73	protein_coding	XP_010913366.1	.	151	185	68	128	105159025168872	133199960572812	495104292262976	796544589570443	0.4635	0.604	3114	0.3924	nonDE
105039075	XM_010915065,XM_019848582,XM_019848583	LOC105039075	uncharacterized LOC105039075, transcript variant X1	protein_coding	XP_010913367.1		255	331	211	204	177586433232202	238319929457301	153627949511012	126949293962789	0.145	0.2145	4086	0.7314	nonDE
105039079	XM_010915069,XM_010915070,XM_010915071,XM_019848564	LOC105039079	homeobox protein knotted-1-like 11, transcript variant X3	protein_coding	XP_010913371.1		170	192	137	79	118390955488135	138239959080972	997489530000408	491617363875508	0.4912	0.643	3248	0.3714	nonDE
105039086	XM_010915087,XM_010915101,XR_002163468,XR_002163469,XR_830842	LOC105039086	zinc finger CCCH domain-containing protein 8, transcript variant X2	protein_coding	XP_010913389.1		166	116	127	116	115605285947237	835199752780873	924680075255852	721868534298214	-0.1307	0.1535	3169	0.8023	nonDE
105039090	XM_010915088,XM_010915089,XM_010915090,XM_019848476,XR_003799878	LOC105039090	uncharacterized LOC105039090, transcript variant X1	protein_coding	XP_010913390.1		163	160	206	222	113516033791564	11519996590081	149987476773784	138150702253624	-0.7427	1666	3685	0.08679	nonDE
105039095	XM_010915096	LOC105039095	protein disulfide isomerase-like 2-3	protein_coding	XP_010913398.1	.	283	280	109	110	197086120018483	201599940326418	793623056715653	6845305066621	1025	2158	3604	0.04608	upReg
105039096	XM_010915131,XM_010915210	LOC105039096	serine/threonine protein phosphatase 2A 57 kDa regulatory subunit B' kappa isoform, transcript variant X1	protein_coding	XP_010913433.1		140	125	138	136	97498433931405	899999733600079	100477047547486	846328626418596	-0.3824	0.6231	3222	0.3815	nonDE
105039099	XM_010915098	LOC105039099	E3 ubiquitin-protein ligase COP1	protein_coding	XP_010913400.1	.	950	893	710	844	661596515963105	642959809683896	516947128686343	525221588748011	-0.08915	0.185	5866	0.7656	nonDE
105039105	XM_010915104,XM_029262722,XR_830835	LOC105039105	putative transcription elongation factor SPT5 homolog 1, transcript variant X3	protein_coding	XP_010913406.1		328	344	192	204	228424902353577	247679926686742	139794153109546	126949293962789	0.4227	0.9243	4157	0.2513	nonDE
105039108	XM_010915109	LOC105039108	chaperonin-like RBCX protein 1, chloroplastic	protein_coding	XP_010913411.1	.	199	164	0	0	13858705965964	11807996504833	0	0	8163	1563	-0.6059	0.09901	nonDE
105039111	XM_010915114	LOC105039111	pyrophosphate--fructose 6-phosphate 1-phosphotransferase subunit beta	protein_coding	XP_010913416.1	.	596	547	268	381	415064761593695	393839883423394	195129338715408	237096475489327	0.491	1239	4884	0.157	nonDE
105039113	XM_010915117,XM_029262725,XR_003799879,XR_830840,XR_830841	LOC105039113	DExH-box ATP-dependent RNA helicase DExH15 chloroplastic, transcript variant X5	protein_coding	XP_010913419.1		705	679	242	384	490974256583146	488879855291563	176198880481824	238963376871133	0.8319	2.14	4988	0.04675	upReg
105039115	XM_010915120	LOC105039115	uncharacterized LOC105039115	protein_coding	XP_010913422.1	.	213	119	65	187	14833690305278	856799746387275	47326145583961	116370186132557	0.143	0.114	3199	0.8531	nonDE
105039120	XM_010915126,XM_019847364,XM_019847365,XM_029262726	LOC105039120	alanine--tRNA ligase, chloroplastic/mitochondrial, transcript variant X3	protein_coding	XP_010913428.1		2727	2712	1490	1770	189913020950672	195263942201873	108486087569387	110147181526538	0.4055	0.9948	7181	0.2259	nonDE
105039121	XM_010915132	LOC105039121	actin-related protein 2/3 complex subunit 2A	protein_coding	XP_010913434.1	.	118	135	58	72	821772514564699	971999712288085	422294837518421	448056331633374	0.6073	0.7286	2649	0.33	nonDE
105039122	XM_010915130	LOC105039122	uncharacterized LOC105039122	protein_coding	XP_010913432.1	.	318	305	288	218	221460728501334	219599934998419	209691229664319	135661500411216	-0.015	0.01907	4272	0.9782	nonDE
105039123	XM_010915134	LOC105039123	betaine aldehyde dehydrogenase 2	protein_coding	XP_010913436.1	.	665	575	463	673	463117561174174	413999877456036	337107775467291	418808209985085	-0.1949	0.4043	5343	0.5429	nonDE
105039124	XM_010915135	LOC105039124	alpha-mannosidase 2	protein_coding	XP_010913437.1	.	154	143	116	122	107248277324545	102959969523849	844589675036842	759206561934329	-0.01742	0.01984	3203	0.9768	nonDE
105039126	XM_010915138,XM_010915139,XR_002163986	LOC105039126	chromatin remodeling protein EBS, transcript variant X1	protein_coding	XP_010913440.1		201	177	62	126	139979894430089	127439962277771	451418619416243	784098580358405	0.7131	1046	3162	0.2098	nonDE
105039135	XM_010915155	LOC105039135	isocitrate dehydrogenase [NADP]	protein_coding	XP_010913457.1	.	593	433	168	332	412975509438022	311759907719067	122319883970853	206603752919834	0.7476	1426	4.58	0.1211	nonDE
105039137	XM_010915154,XM_029262732	LOC105039137	uncharacterized LOC105039137, transcript variant X1	protein_coding	XP_010913456.1		102	87	117	39	710345732928808	626399814585655	851870620511297	242697179634744	0.2551	0.177	2471	0.7754	nonDE
105039146	XM_010915166,XM_010915167,XM_010915168,XR_003799880,XR_830847,XR_830848	LOC105039146	ferredoxin-thioredoxin reductase catalytic chain, chloroplastic, transcript variant X5	protein_coding	XP_010913468.1		775	521	243	313	539723473548849	375119888964513	176926975029269	194780044168397	0.8606	2038	4855	0.05406	nonDE
105039155	XM_010915184,XM_010915187,XM_010915188	LOC105039155	alpha-mannosidase I MNS5, transcript variant X2	protein_coding	XP_010913486.1		134	130	80	112	93319929620059	935999722944082	582475637956443	696976515874138	0.1245	0.1401	2955	0.8192	nonDE
105039156	XM_010915198	LOC105039156	uncharacterized LOC105039156	protein_coding	XP_010913500.1	.	132	92	104	49	919270948496104	662399803929658	757218329343375	304927225694935	0.3575	0.3108	2623	0.6324	nonDE
105039167	XM_010915219	LOC105039167	probable plastid-lipid-associated protein 14, chloroplastic	protein_coding	XP_010913521.1	.	343	357	218	185	238871163131942	257039923916183	158724611343131	115125585211353	0.4658	0.9714	4197	0.2341	nonDE
105039171	XM_010915213,XM_029262738,XR_003799881,XR_003799882,XR_003799883,XR_830858	LOC105039171	uncharacterized LOC105039171, transcript variant X2	protein_coding	XP_010913515.1		746	729	578	497	519527369377344	524879844635566	42083864842353	309283328919149	0.1246	0.2356	5441	0.7115	nonDE
105039179	XM_010915237,XM_029262741	LOC105039179	protease Do-like 9, transcript variant X2	protein_coding	XP_010913539.1		364	245	133	201	253495928221653	176399947785615	968365748102586	125082392580984	0.523	0.9352	3935	0.2465	nonDE
105039187	XM_010915254,XM_019851822	LOC105039187	glutamate synthase 1 [NADH], chloroplastic, transcript variant X2	protein_coding	XP_010913556.1		1187	1044	2979	1709	826647436261269	751679777502786	21689936568403	106351148716866	-1374	2768	6774	0.02128	downReg
105039191	XM_010915257	LOC105039191	AP-1 complex subunit gamma-2	protein_coding	XP_010913559.1	.	459	367	450	374	319655579817963	264239921784983	327642546350499	232740372265114	-0.3313	0.6803	4826	0.3525	nonDE
105039197	XM_010915272,XM_029262758,XM_029262759	LOC105039197	U4/U6 small nuclear ribonucleoprotein Prp31 homolog, transcript variant X1	protein_coding	XP_010913574.1		539	359	336	356	375368970635909	258479923489943	244639767941706	22153896397428	0.01156	0.01589	4753	0.9817	nonDE
105039198	XM_010915274	LOC105039198	aldehyde dehydrogenase family 2 member B7, mitochondrial	protein_coding	XP_010913576.1	.	1011	646	1027	1535	704077976461789	465119862324521	747753100226583	95523120702393	-0.97	2316	6121	0.03765	downReg
105039204	XM_010915280	LOC105039204	homeobox-leucine zipper protein HOX16	protein_coding	XP_010913582.1	.	44	50	120	252	306423649498701	359999893440032	873713456934664	156819716071681	-2247	1568	2.65	0.09874	nonDE
105039205	XM_010915281	LOC105039205	DEAD-box ATP-dependent RNA helicase 29	protein_coding	XP_010913583.1	.	195	288	360	358	135801390118743	207359938621458	262114037080399	222783564895483	-0.9395	2058	4334	0.05287	nonDE
105039206	XM_010915282	LOC105039206	RNA-binding protein 25	protein_coding	XP_010913584.1	.	223	174	167	180	155301076905024	125279962917131	121591789423407	112014082908344	-0.1526	0.2287	3677	0.7181	nonDE
105039208	XM_010915284	LOC105039208	calcium sensing receptor, chloroplastic	protein_coding	XP_010913586.1	.	250	219	162	128	17410434630608	157679953326734	11795131668618	796544589570443	0.3742	0.626	3668	0.3802	nonDE
105039209	XM_010915285,XM_029262762	LOC105039209	probable acyl-activating enzyme 17, peroxisomal, transcript variant X1	protein_coding	XP_010913587.1		199	207	89	96	13858705965964	149039955884173	648004147226542	597408442177833	0.7932	1423	3247	0.1216	nonDE
105039211	XM_010915288,XM_010915289	LOC105039211	protein CHAPERONE-LIKE PROTEIN OF POR1, chloroplastic, transcript variant X1	protein_coding	XP_010913590.1		393	336	103	197	273692032393158	241919928391701	74993738386892	122593190738576	0.9879	1966	3977	0.05804	nonDE
105039218	XM_010915294,XM_019848693	LOC105039218	importin-9, transcript variant X2	protein_coding	XP_010913596.1		131	143	101	79	912306774643861	102959969523849	735375492920009	491617363875508	0.2942	0.3557	2939	0.5862	nonDE
105039239	XM_010915317,XR_830869	LOC105039239	RNA-binding protein with multiple splicing 2, transcript variant X1	protein_coding	XP_010913619.1	.	154	153	135	170	107248277324545	11015996739265	982927639051497	105791078302325	-0.3252	0.5497	3401	0.4296	nonDE
105039242	XM_010915323,XM_010915332	LOC105039242	spermine synthase, transcript variant X1	protein_coding	XP_010913625.1		186	163	87	152	129533633651724	11735996526145	633442256277631	945896700114902	0.2342	0.3054	3294	0.6374	nonDE
105039245	XM_010915324	LOC105039245	zinc finger protein CONSTANS-LIKE 4	protein_coding	XP_010913626.1	.	50	67	193	213	348208692612161	482399857209642	140522247656992	132549998108207	-2166	2861	2911	0.01885	downReg
105039247	XM_010915326,XM_029262764,XM_029262765	LOC105039247	ADP-ribosylation factor 1, transcript variant X1	protein_coding	XP_010913628.1		138	143	159	130	961055991609563	102959969523849	115767033043843	808990598782482	-0.3611	0.555	3.3	0.4254	nonDE
105039252	XM_010915334,XM_019848414,XM_019848415,XM_019848416,XR_002164001	LOC105039252	26S proteasome regulatory subunit 4 homolog A, transcript variant X1	protein_coding	XP_010913636.1		780	749	702	601	543205560474971	539279840373167	511122372306778	374002576821747	-0.1024	0.1891	5605	0.7603	nonDE
105039256	XM_010915342,XM_010915343,XM_010915344	LOC105039256	calmodulin-binding protein 60 C, transcript variant X1	protein_coding	XP_010913644.1		357	336	468	439	248621006525083	241919928391701	340748248204519	273189902204238	-0.7235	1968	4776	0.05795	nonDE
105039259	XM_010915347	LOC105039259	4-coumarate--CoA ligase 2	protein_coding	XP_010913649.1	.	27	100	242	186	188032694010567	719999786880063	176198880481824	115747885671955	-2446	2089	2868	0.05062	nonDE
105039267	XM_010915359	LOC105039267	NADPH--cytochrome P450 reductase-like	protein_coding	XP_010913661.1	.	647	506	246	291	450582048240136	364319892161312	179111258671606	181089434035155	0.7555	1985	4758	0.05736	nonDE
105039272	XM_010915373	LOC105039272	60S ribosomal protein L35a-1	protein_coding	XP_010913675.1	.	239	211	108	110	166443755068613	151919955031693	786342111241197	6845305066621	0.7068	1362	3438	0.1318	nonDE
105039274	XM_010915374	LOC105039274	ACT domain-containing protein DS12, chloroplastic	protein_coding	XP_010913676.1	.	3530	2430	764	1238	245835336984185	174959948211855	556264234248403	770407970225163	1249	2781	6865	0.02096	upReg
105039276	XM_029262771	LOC105039276	pentatricopeptide repeat-containing protein At2g18940, chloroplastic	protein_coding	XP_029118604.1	.	207	218	69	78	144158398741434	156959953539854	502385237737432	485394359269489	1187	1984	3114	0.05738	nonDE
105039277	XM_010915377	LOC105039277	plasma membrane ATPase	protein_coding	XP_010913679.1	.	287	277	123	204	19987178955938	199439940965777	89555629335803	126949293962789	0.4772	0.8908	3871	0.2642	nonDE
105039288	XM_010915396,XR_830883	LOC105039288	villin-5, transcript variant X2	protein_coding	XP_010913698.1	.	387	526	389	243	269513528081812	378719887898913	28322877895632	151219011926264	0.2272	0.3023	4686	0.6406	nonDE
105039297	XM_010915404,XM_029262778	LOC105039297	probable protein phosphatase 2C 59, transcript variant X1	protein_coding	XP_010913706.1		177	187	59	85	123265877184705	134639960146572	429575782992876	528955391511623	0.9952	1526	2977	0.1037	nonDE
105039302	XM_010915411	LOC105039302	WRKY transcription factor WRKY51	protein_coding	XP_010913713.1	.	204	204	487	860	142069146585762	146879956523533	354582044605984	535178396117642	-2007	4033	4651	0.005338	downReg
105039309	XM_019848215,XM_029262781,XM_029262783,XM_029262784,XM_029262785	LOC105039309	calcium-transporting ATPase 5, plasma membrane-type, transcript variant X1	protein_coding	XP_019703774.1		407	335	368	559	283441875786299	241199928604821	267938793459964	347865957476467	-0.6401	1569	4822	0.09863	nonDE
105039311	XM_010915421,XM_019847390	LOC105039311	60S ribosomal protein L7-2, transcript variant X1	protein_coding	XP_010913723.1		382	404	253	295	266031441155691	290879913899545	184207920503725	183578635877563	0.182	0.3509	4502	0.5907	nonDE
105039313	XM_010915424,XM_019848124,XM_029262787	LOC105039313	mannosyl-oligosaccharide 1,2-alpha-mannosidase MNS1, transcript variant X1	protein_coding	XP_010913726.1		160	170	57	74	111426781635891	122399963769611	415013892043965	460502340845413	0.9822	1402	2845	0.1254	nonDE
105039319	XM_010915434,XM_029262790,XR_002163783	LOC105039319	DNA ligase 4, transcript variant X2	protein_coding	XP_010913736.1		352	318	200	302	245138919598961	22895993222786	145618909489111	187934739101776	0.09735	0.1496	4.31	0.8081	nonDE
105039332	XM_010915457	LOC105039332	V-type proton ATPase catalytic subunit A	protein_coding	XP_010913759.1	.	311	438	173	218	216585806804764	315359906653468	125960356708081	135661500411216	0.5795	1.13	4211	0.1838	nonDE
105039338	XM_010915468,XM_019848523,XM_019848524,XM_029262798,XM_029262799,XR_003799915	LOC105039338	pumilio homolog 5, transcript variant X6	protein_coding	XP_010913770.1		399	428	258	366	277870536704504	308159908784667	187848393240953	227761968580299	0.07992	0.1294	4623	0.833	nonDE
105039339	XM_010915471	LOC105039339	transcription factor GTE7	protein_coding	XP_010913773.1	.	719	676	327	472	500724099976287	486719855930923	238086917014696	293725817404101	0.4824	1252	5177	0.1543	nonDE
105039349	XM_010915487	LOC105039349	26S proteasome non-ATPase regulatory subunit 1 homolog A	protein_coding	XP_010913789.1	.	492	437	382	564	342637353530366	314639906866588	278132117124201	350977459779477	-0.3454	0.7896	5003	0.3032	nonDE
105039359	XM_010915500	LOC105039359	serine/threonine-protein kinase STY13	protein_coding	XP_010913802.1	.	313	327	251	329	217978641575213	235439930309781	182751731408834	204736851538028	-0.1904	0.3559	4.39	0.5861	nonDE
105039360	XM_010915504	LOC105039360	abscisic acid receptor PYL8	protein_coding	XP_010913806.1	.	107	70	87	152	745166602190024	503999850816044	633442256277631	945896700114902	-0.761	0.999	2791	0.2246	nonDE
105039361	XM_019848345,XM_029262807,XM_029262808,XM_029262809,XM_029262810	LOC105039361	YTH domain-containing protein ECT4-like, transcript variant X2	protein_coding	XP_019703904.2		106	144	140	115	738202428337781	103679969310729	101933236642377	715645529692195	-0.3694	0.4939	3118	0.4691	nonDE
105039369	XM_010915513	LOC105039369	ATP-dependent zinc metalloprotease FTSH 9, chloroplastic/mitochondrial	protein_coding	XP_010913815.2	.	478	480	310	161	332887510137226	34559989770243	225709309708121	100190374156907	0.7774	1318	4.5	0.1407	nonDE
105039370	XM_010915509,XM_010915510,XM_029262815,XM_029262816,XR_003799923	LOC105039370	pre-mRNA-splicing factor ATP-dependent RNA helicase DEAH7, transcript variant X1	protein_coding	XP_010913811.1		469	494	383	436	326619753670207	355679894718751	278860211671647	271323000822432	-0.1044	0.1994	4938	0.7491	nonDE
105039371	XM_010915511,XM_029262812,XM_029262813,XM_029262814,XR_003799922	LOC105039371	stromal processing peptidase, chloroplastic, transcript variant X3	protein_coding	XP_010913813.1		2063	1612	714	703	143670906571777	116063965645066	519859506876125	437477223803142	1023	2.88	6295	0.01885	upReg
105039372	XM_010915512	LOC105039372	probable calcium-binding protein CML31	protein_coding	XP_010913814.1	.	76	32	295	428	529277212770484	23039993180162	214787891496438	266344597137617	-3123	2857	3201	0.01885	downReg
105039381	XM_029262054	LOC105039381	protein SWEETIE	protein_coding	XP_029117887.1	.	676	607	633	788	470778152411641	437039870636198	460883848533035	490372762954304	-0.4807	1409	5538	0.1242	nonDE
105039422	XM_010915553,XM_019848356	LOC105039422	DExH-box ATP-dependent RNA helicase DExH12, transcript variant X2	protein_coding	XP_010913855.1		3109	3338	3355	3687	216516165066241	240335928860565	244275720667983	229442179823924	-0.4656	1022	7861	0.217	nonDE
105039431	XM_010915566,XM_029262849,XM_029262850,XM_029262851,XM_029262852,XR_003799940,XR_003799941,XR_003799942	LOC105039431	pyrophosphate--fructose 6-phosphate 1-phosphotransferase subunit alpha, transcript variant X1	protein_coding	XP_010913868.1		112	131	45	101	77998747145124	943199720812883	327642546350499	628523465207928	0.4304	0.4261	2.65	0.5237	nonDE
105039433	XM_010915567,XM_019848236,XM_019848237,XM_029262843,XM_029262844,XM_029262845,XM_029262846,XM_029262847,XM_029262848,XR_003799938,XR_003799939	LOC105039433	brefeldin A-inhibited guanine nucleotide-exchange protein 1, transcript variant X9	protein_coding	XP_010913869.1		334	358	356	406	232603406664923	257759923703063	259201658890617	252653987004375	-0.4775	1223	4648	0.1605	nonDE
105039437	XM_010915573,XM_029262842	LOC105039437	AT-rich interactive domain-containing protein 5, transcript variant X2	protein_coding	XP_010913875.1		148	163	102	134	1030697730132	11735996526145	742656438394464	833882617206558	0.05871	0.06867	3223	0.9105	nonDE
105039442	XM_010915582,XM_010915583,XM_010915585,XM_019848482,XM_019848483,XM_029262841	LOC105039442	RNA polymerase I-specific transcription initiation factor RRN3, transcript variant X2	protein_coding	XP_010913884.2		440	494	412	372	306423649498701	355679894718751	299974953547568	23149577134391	-0.08445	0.1411	4884	0.8178	nonDE
105039447	XM_010915592	LOC105039447	GTP 3',8-cyclase, mitochondrial	protein_coding	XP_010913894.1	.	99	108	97	131	689453211372078	777599769830468	706251711022187	815213603388501	-0.4766	0.6925	2905	0.3467	nonDE
105039449	XM_010915601	LOC105039449	protein WHAT'S THIS FACTOR 1, chloroplastic	protein_coding	XP_010913903.1	.	235	170	38	25	163658085527715	122399963769611	27667592802931	155575115150477	2391	1152	2452	0.1783	nonDE
105039451	XM_010915600	LOC105039451	zinc finger CCCH domain-containing protein 31	protein_coding	XP_010913902.1	.	155	155	40	51	10794469470977	11159996696641	291237818978221	317373234906974	1411	1135	2541	0.1828	nonDE
105039453	XM_010915604,XM_010915606,XM_029262838	LOC105039453	protein EMSY-LIKE 3, transcript variant X1	protein_coding	XP_010913906.1		148	214	169	283	1030697730132	154079954392333	123047978518298	17611103035034	-0.6501	1098	3771	0.1921	nonDE
105039455	XM_010915608	LOC105039455	probable serine/threonine-protein kinase DDB_G0280111	protein_coding	XP_010913910.1	.	183	175	110	88	127444381496051	125999962704011	800904002190108	54762440532968	0.5413	0.8562	3201	0.2774	nonDE
105039460	XM_010915612	LOC105039460	linoleate 13S-lipoxygenase 2-1, chloroplastic	protein_coding	XP_010913914.2	.	711	458	375	260	495152760894492	329759902391069	273035455292082	161798119756496	0.5451	0.9693	4867	0.235	nonDE
105039465	XM_010915625,XM_010915640	LOC105039465	RNA polymerase sigma factor sigE, chloroplastic/mitochondrial, transcript variant X2	protein_coding	XP_010913927.1		516	434	476	649	35935137077575	312479907505947	346573004584083	403872998930639	-0.5728	1564	5147	0.0989	nonDE
105039476	XM_029262829	LOC105039476	zinc finger A20 and AN1 domain-containing stress-associated protein 8	protein_coding	XP_029118662.1	.	130	98	156	266	905342600791618	705599791142462	113582749401506	165531922520108	-1192	2115	3393	0.04874	downReg
105039485	XM_010915648,XM_010915649	LOC105039485	ADP,ATP carrier protein 1, mitochondrial, transcript variant X2	protein_coding	XP_010913950.1		607	604	410	462	422725352831163	434879871275558	298518764452677	287502812798082	0.1363	0.2855	5149	0.6573	nonDE
105039488	XM_010915651,XM_010915653	LOC105039488	E3 ubiquitin-protein ligase UPL5, transcript variant X2	protein_coding	XP_010913953.1		253	209	144	199	176193598461753	150479955457933	10484561483216	12383779165978	0.0968	0.1361	3772	0.8242	nonDE
105039489	XM_010915654	LOC105039489	glycerophosphodiester phosphodiesterase GDPDL4	protein_coding	XP_010913956.1	.	157	239	143	80	109337529480218	172079949064335	104117520284714	497840368481527	0.5502	0.6526	3318	0.3675	nonDE
105039494	XM_010915663,XR_003800562,XR_003800564,XR_830922,XR_830923	LOC105039494	protein SEH1, transcript variant X2	protein_coding	XP_010913965.1	.	108	135	69	80	752130776042267	971999712288085	502385237737432	497840368481527	0.3503	0.3957	2717	0.5494	nonDE
105039495	XM_010915661,XM_019848497,XM_019848498,XM_019848499,XM_029262827,XR_003799935,XR_830919	LOC105039495	DNA topoisomerase 1 beta, transcript variant X7	protein_coding	XP_010913963.1		305	338	304	338	212407302493418	243359927965461	221340742423448	210337555683445	-0.3382	0.7515	4471	0.3192	nonDE
105039497	XM_010915665	LOC105039497	cell division protein FtsZ homolog 1, chloroplastic	protein_coding	XP_010913967.1	.	104	131	56	49	724274080633294	943199720812883	40773294656951	304927225694935	0.8471	0.7394	2443	0.3249	nonDE
105039498	XM_010915666	LOC105039498	transcription initiation factor TFIID subunit 6	protein_coding	XP_010913968.1	.	402	334	156	259	279959788860177	240479928817941	113582749401506	161175819295894	0.5176	1.04	4231	0.2117	nonDE
105039499	XM_010915667,XR_003799934	LOC105039499	serine/threonine-protein phosphatase PP-X isozyme 2, transcript variant X1	protein_coding	XP_010913969.1	.	153	175	220	205	106551859939321	125999962704011	160180800438022	127571594423391	-0.7123	1485	3.69	0.1112	nonDE
105039501	XM_010915669	LOC105039501	fumarylacetoacetase	protein_coding	XP_010913971.1	.	391	267	123	156	27229919762271	192239943096977	89555629335803	970788718538978	0.8782	1785	3872	0.07359	nonDE
105039506	XM_010915675	LOC105039506	sodium/hydrogen exchanger 6	protein_coding	XP_010913977.1	.	522	499	436	416	363529875087096	359279893653151	317449222686261	258876991610394	-0.07536	0.1355	5.01	0.825	nonDE
105039512	XM_010915682	LOC105039512	bifunctional aspartokinase/homoserine dehydrogenase 1, chloroplastic	protein_coding	XP_010913984.1	.	406	364	134	171	282745458401074	262079922424343	975646693577041	106413378762926	0.9983	2422	4061	0.03318	upReg
105039517	XM_010915687	LOC105039517	chlorophyll a-b binding protein 8, chloroplastic	protein_coding	XP_010913989.1	.	2245	1911	2434	4705	15634570298286	13759195927278	177218212848248	292792366713198	-1038	2158	7514	0.04608	downReg
105039522	XM_010915701,XM_010915702,XR_003799931	LOC105039522	uncharacterized WD repeat-containing protein C2A9.03, transcript variant X1	protein_coding	XP_010914003.1		43	62	132	119	299459475646458	446399867865639	96108480262813	740537548116272	-1.63	1607	2483	0.09432	nonDE
105039523	XM_010915703,XM_010915704,XM_010915705,XM_010915706,XM_010915707,XM_010915708,XM_010915709,XM_010915710,XM_029262823,XM_029262824	LOC105039523	phosphatidylinositol/phosphatidylcholine transfer protein SFH13, transcript variant X1	protein_coding	XP_010914005.1		148	108	155	129	1030697730132	777599769830468	112854654854061	802767594176463	-0.4823	0.7448	3212	0.3229	nonDE
105039526	XM_019848191	LOC105039526	cinnamoyl-CoA reductase 1-like	protein_coding	XP_019703750.1	.	189	146	62	0	131622885807397	105119968884489	451418619416243	0	4561	0.6798	1075	0.3525	nonDE
105039544	XM_010915725,XM_010915727,XM_010915729,XM_029262855	LOC105039544	monogalactosyldiacylglycerol synthase 1, chloroplastic, transcript variant X4	protein_coding	XP_010914027.1		643	520	615	419	447796378699239	374399889177633	447778146679015	2607438929922	-0.1421	0.2121	5226	0.7338	nonDE
105039547	XM_010915733	LOC105039547	protein TSS	protein_coding	XP_010914035.1	.	5567	4963	3493	2859	38769555835438	357335894228575	254323425422732	177915701686086	0.3877	0.6936	8137	0.3465	nonDE
105039550	XM_010915735	LOC105039550	nudix hydrolase 3	protein_coding	XP_010914037.1	.	110	107	93	98	766059123746753	770399771961667	677127929124364	609854451389871	-0.152	0.1701	2.82	0.7831	nonDE
105039553	XM_010915742	LOC105039553	probable serine incorporator	protein_coding	XP_010914044.1	.	122	143	128	271	849629209973672	102959969523849	931961020730308	168643424823117	-0.853	1309	3442	0.1426	nonDE
105039555	XM_010915744	LOC105039555	protein TIC 55, chloroplastic	protein_coding	XP_010914046.2	.	166	126	69	99	115605285947237	90719973146888	502385237737432	61607745599589	0.4524	0.596	2923	0.3971	nonDE
105039559	XM_010915751	LOC105039559	mitochondrial adenine nucleotide transporter ADNT1	protein_coding	XP_010914053.1	.	544	274	202	360	378851057562031	197279941605137	147075098584002	224028165816687	0.1694	0.1889	4.48	0.7606	nonDE
105039562	XM_010915753	LOC105039562	UDP-glucuronate 4-epimerase 1	protein_coding	XP_010914055.1	.	61	80	375	699	424814604986836	575999829504051	273035455292082	434988021960734	-3223	3977	3713	0.005651	downReg
105039578	XM_010915769	LOC105039578	eukaryotic translation initiation factor 3 subunit C	protein_coding	XP_010914071.1	.	126	197	133	88	877485905382645	141839958015372	968365748102586	54762440532968	0.2243	0.2286	3178	0.7181	nonDE
105039581	XM_010915773	LOC105039581	uncharacterized LOC105039581	protein_coding	XP_010914075.1	.	149	115	66	69	103766190398424	827999754912073	480542401314065	429387317815317	0.6233	0.7815	2706	0.3072	nonDE
105039584	XM_010915776	LOC105039584	probable alpha,alpha-trehalose-phosphate synthase [UDP-forming] 9	protein_coding	XP_010914078.1	.	121	75	419	265	842665036121429	539999840160047	305071615379687	164909622059506	-2115	3028	3626	0.01621	downReg
105039586	XM_010915778,XM_029262863,XR_003799957,XR_003799958	LOC105039586	serine/arginine-rich splicing factor RSZ21A, transcript variant X4	protein_coding	XP_010914080.1		109	129	112	106	75909494989451	928799725075281	815465893139019	659638488238023	-0.2126	0.2603	2979	0.6841	nonDE
105039589	XM_010915781	LOC105039589	UDP-galactose/UDP-glucose transporter 7	protein_coding	XP_010914083.1	.	102	114	82	132	710345732928808	820799757043272	597037528905354	82143660799452	-0.3124	0.3805	2877	0.5641	nonDE
105039602	XM_010915801,XM_029262869,XM_029262870,XM_029262871,XR_003799962,XR_003799963,XR_003799964,XR_003799965,XR_003799966	LOC105039602	zinc finger protein CONSTANS-LIKE 3, transcript variant X5	protein_coding	XP_010914103.1		91	82	140	229	633739820554132	590399825241652	101933236642377	142506805477837	-1395	2304	3108	0.03843	downReg
105039615	XM_010915823,XM_010915824	LOC105039615	calmodulin-binding protein 60 B, transcript variant X1	protein_coding	XP_010914125.1		429	409	286	395	298763058261234	294479912833946	208235040569428	245808681937754	-0.02732	0.04276	4697	0.9464	nonDE
105039617	XM_029262872,XM_029262873,XR_003799967,XR_003799968,XR_003799969,XR_003799970	LOC105039617	pentatricopeptide repeat-containing protein At5g10690, transcript variant X2	protein_coding	XP_029118705.1		164	136	66	61	114212451176789	979199710156886	480542401314065	379603280967164	0.9147	1221	2757	0.1606	nonDE
105039619	XM_010915829	LOC105039619	4-coumarate--CoA ligase 1	protein_coding	XP_010914131.1	.	44	60	242	144	306423649498701	431999872128038	176198880481824	896112663266749	-2202	1763	2766	0.07576	nonDE
105039636	XM_010915848,XR_830947	LOC105039636	NADPH--cytochrome P450 reductase, transcript variant X1	protein_coding	XP_010914150.1	.	180	186	314	131	125355129340378	133919960359692	228621687897904	815213603388501	-0.4661	0.4983	3737	0.4655	nonDE
105039638	XM_010915851,XM_010915852	LOC105039638	VIN3-like protein 2, transcript variant X1	protein_coding	XP_010914153.1		124	132	318	320	863557557678158	950399718681683	231534066087686	199136147392611	-1653	3619	3806	0.008466	downReg
105039646	XM_010915862	LOC105039646	cytoplasmic 60S subunit biogenesis factor REI1 homolog 1	protein_coding	XP_010914164.1	.	274	245	147	194	190818363551464	176399947785615	107029898474496	12072628935677	0.2728	0.4883	3856	0.4739	nonDE
105039648	XM_010915864	LOC105039648	aldehyde dehydrogenase family 2 member B7, mitochondrial	protein_coding	XP_010914166.1	.	1194	829	1063	2111	83152235795784	596879823323572	773964503934623	131367627233063	-0.9197	1873	6398	0.06581	nonDE
105039650	XM_010915865,XM_019848761	LOC105039650	U4/U6 small nuclear ribonucleoprotein Prp31 homolog, transcript variant X2	protein_coding	XP_010914167.1		452	339	286	266	314780658121393	244079927752341	208235040569428	165531922520108	0.1728	0.2961	4506	0.6478	nonDE
105039655	XM_010915871	LOC105039655	adagio-like protein 1	protein_coding	XP_010914173.1	.	466	419	290	313	324530501514534	301679910702746	21114741875921	194780044168397	0.2142	0.4495	4657	0.5048	nonDE
105039658	XM_010915881,XM_010915890	LOC105039658	ubiquitin-conjugating enzyme E2 28, transcript variant X1	protein_coding	XP_010914183.1		902	726	471	747	628168481472338	522719845274926	342932531846856	464858444069626	0.1048	0.1778	5581	0.7747	nonDE
105039662	XM_010915888,XM_029262884	LOC105039662	plasma membrane ATPase, transcript variant X2	protein_coding	XP_010914190.1		628	766	1109	2232	437350117920874	551519836750128	807456853117118	138897462806346	-1.51	3153	6173	0.01395	downReg
105039666	XM_010915893,XM_019848758	LOC105039666	uncharacterized LOC105039666, transcript variant X2	protein_coding	XP_010914195.1		300	222	366	934	208925215567296	159839952687374	266482604365072	581228630202183	-1525	2385	4747	0.03463	downReg
105039668	XM_010915895	LOC105039668	nifU-like protein 3, chloroplastic	protein_coding	XP_010914197.1	.	299	212	99	225	208228798182072	152639954818573	720813601971098	14001760363543	0.3895	0.504	3746	0.4621	nonDE
105039674	XM_010915905	LOC105039674	muscle M-line assembly protein unc-89	protein_coding	XP_010914207.1	.	119	100	81	70	828736688416942	719999786880063	589756583430898	435610322421336	0.2132	0.2176	2654	0.7293	nonDE
105039675	XM_010915906	LOC105039675	probable protein S-acyltransferase 19	protein_coding	XP_010914208.1	.	154	181	92	176	107248277324545	130319961425291	669846983649909	109524881065936	0.02302	0.02302	3336	0.9726	nonDE
105039677	XM_010915915,XM_019848458,XM_029263896	LOC105039677	exosome complex component RRP41 homolog, transcript variant X2	protein_coding	XP_010914217.1		182	161	29	0	126747964110826	11591996568769	21114741875921	0	5144	0.8387	0.826	0.2832	nonDE
105039679	XM_010915916,XM_010915917,XM_010915918	LOC105039679	probable potassium transporter 11, transcript variant X1	protein_coding	XP_010914218.1		250	166	511	446	17410434630608	11951996462209	372056313744678	277546005428451	-1558	3402	4431	0.01031	downReg
105039684	XM_010915928,XM_010915930,XM_010915932,XM_029262888	LOC105039684	bifunctional purine biosynthesis protein PurH, transcript variant X1	protein_coding	XP_010914230.1		241	192	118	268	167836589839061	138239959080972	859151565985753	166776523441312	-0.08267	0.0851	3759	0.8901	nonDE
105039687	XM_010915934,XM_010915935	LOC105039687	UDP-N-acetylglucosamine diphosphorylase 1, transcript variant X2	protein_coding	XP_010914236.1		153	204	112	141	106551859939321	146879956523533	815465893139019	877443649448692	0.1412	0.1762	3368	0.7764	nonDE
105039689	XM_010915940,XM_010915941,XM_019847037,XR_002163627,XR_002163629,XR_003799987	LOC105039689	probable serine/threonine protein kinase IRE4, transcript variant X1	protein_coding	XP_010914242.1		75	75	174	115	522313038918241	539999840160047	126688451255526	715645529692195	-1.23	1661	2837	0.08733	nonDE
105039690	XM_010915942	LOC105039690	cytochrome P450 97B2, chloroplastic	protein_coding	XP_010914244.1	.	193	174	135	175	134408555348294	125279962917131	982927639051497	108902580605334	-0.09089	0.125	3539	0.8393	nonDE
105039695	XM_010915947	LOC105039695	choline-phosphate cytidylyltransferase 2	protein_coding	XP_010914249.1	.	232	256	208	398	161568833372043	184319945441296	151443665868675	24767558331956	-0.5965	1066	4195	0.2032	nonDE
105039699	XM_010915952,XM_019848746,XM_029262890	LOC105039699	probable allantoate deiminase, transcript variant X1	protein_coding	XP_010914254.1		298	288	34	63	207532380796848	207359938621458	247552146131488	392049290179203	2238	2047	3016	0.05358	nonDE
105039701	XM_010915956,XM_029262891,XR_002164054	LOC105039701	protein SUPPRESSOR OF FRI 4, transcript variant X3	protein_coding	XP_010914258.1		137	146	169	222	95409181775732	105119968884489	123047978518298	138150702253624	-0.7969	1673	3519	0.08608	nonDE
105039711	XM_010915965	LOC105039711	ALA-interacting subunit 1	protein_coding	XP_010914267.1	.	133	197	316	602	926235122348347	141839958015372	230077876992795	374624877282349	-1782	3109	4.2	0.01454	downReg
105039714	XM_010915973,XM_010915974,XM_010915976,XM_019848767,XM_029262906,XM_029262907,XR_830968,XR_830969	LOC105039714	deoxyhypusine synthase, transcript variant X3	protein_coding	XP_010914275.1		301	244	65	41	209621632952521	175679947998735	47326145583961	255143188846783	2143	2267	3038	0.04058	upReg
105039715	XM_010915981,XM_010915990,XR_003800536,XR_003800537,XR_830972	LOC105039715	uncharacterized LOC105039715, transcript variant X2	protein_coding	XP_010914283.1		197	131	94	81	137194224889191	943199720812883	68440887459882	504063373087546	0.5592	0.7574	3037	0.3174	nonDE
105039716	XM_010915977,XM_010915978,XR_830970	LOC105039716	succinate-semialdehyde dehydrogenase, mitochondrial, transcript variant X3	protein_coding	XP_010914279.1		410	243	127	179	285531127941972	174959948211855	924680075255852	111391782447742	0.7209	1267	3916	0.1512	nonDE
105039721	XM_010915985,XR_830971	LOC105039721	protein PLASTID TRANSCRIPTIONALLY ACTIVE 14, transcript variant X1	protein_coding	XP_010914287.2	.	223	173	66	57	155301076905024	124559963130251	480542401314065	354711262543088	1371	1856	2929	0.06732	nonDE
105039722	XM_010915986,XM_029262911,XM_029262913	LOC105039722	multiple RNA-binding domain-containing protein 1, transcript variant X2	protein_coding	XP_010914288.1		246	180	146	152	171318676765183	129599961638411	106301803927051	945896700114902	0.1633	0.2335	3616	0.7134	nonDE
105039747	XM_010916010,XM_010916015	LOC105039747	V-type proton ATPase subunit E, transcript variant X1	protein_coding	XP_010914312.1		350	274	333	307	243746084828512	197279941605137	242455484299369	191046241404786	-0.3777	0.796	4444	0.3	nonDE
105039763	XM_010916020	LOC105039763	26S proteasome non-ATPase regulatory subunit 8 homolog A	protein_coding	XP_010914322.1	.	199	93	103	119	13858705965964	669599801798459	74993738386892	740537548116272	-0.03094	0.02625	3089	0.97	nonDE
105039770	XM_010916035,XM_019848360,XR_003799999	LOC105039770	piezo-type mechanosensitive ion channel homolog, transcript variant X1	protein_coding	XP_010914337.1		300	285	308	273	208925215567296	205199939260818	22425312061323	169888025744321	-0.3199	0.644	4332	0.3714	nonDE
105039774	XM_010916037,XM_010916038,XM_010916039,XM_010916040	LOC105039774	putative E3 ubiquitin-protein ligase RF298, transcript variant X1	protein_coding	XP_010914339.1		114	100	64	65	793915819155726	719999786880063	465980510365154	404495299391241	0.3971	0.4203	2527	0.5278	nonDE
105039779	XM_010916045,XM_010916046,XM_029262917	LOC105039779	nuclear pore complex protein NUP107, transcript variant X1	protein_coding	XP_010914347.1		198	202	150	152	137890642274416	145439956949773	109214182116833	945896700114902	0.06831	0.09214	3589	0.8805	nonDE
105039784	XM_010916050,XM_010916051	LOC105039784	receptor-like cytosolic serine/threonine-protein kinase RBK2, transcript variant X2	protein_coding	XP_010914352.1		46	46	191	136	320351997203188	331199901964829	139066058562101	846328626418596	-2125	1595	2582	0.09593	nonDE
105039789	XM_010916059	LOC105039789	ribosome biogenesis protein NOP53	protein_coding	XP_010914361.1	.	141	217	113	228	981948513166293	156239953752974	822746838613475	141884505017235	-0.2408	0.2683	3537	0.6744	nonDE
105039794	XM_010916067	LOC105039794	serine/threonine-protein phosphatase BSL1 homolog	protein_coding	XP_010914369.2	.	509	543	667	1265	354476449079179	390959884275874	485639063146184	787210082661415	-1144	2597	5585	0.0259	downReg
105039798	XM_010916077	LOC105039798	BTB/POZ domain-containing protein POB1	protein_coding	XP_010914379.1	.	118	101	177	329	821772514564699	727199784748864	128872734897863	204736851538028	-1491	2552	3491	0.02795	downReg
105039800	XM_010916076,XM_029262921	LOC105039800	general transcription and DNA repair factor IIH helicase subunit XPD, transcript variant X1	protein_coding	XP_010914378.2		112	113	107	75	77998747145124	813599759174471	779061165766742	466725345451432	0.01621	0.01426	2.8	0.9836	nonDE
105039801	XM_010916078	LOC105039801	sister-chromatid cohesion protein 3	protein_coding	XP_010914380.1	.	422	490	290	285	293888136564664	352799895571231	21114741875921	177355631271544	0.3239	0.6888	4644	0.3484	nonDE
105039802	XM_010916080,XM_029262922	LOC105039802	cyclin-L1-1, transcript variant X2	protein_coding	XP_010914382.1		367	404	353	482	255585180377326	290879913899545	25701737524828	29994882201012	-0.4435	1073	4784	0.2006	nonDE
105039809	XM_010916087,XR_003800001,XR_830987	LOC105039809	syntaxin-132, transcript variant X3	protein_coding	XP_010914389.1	.	148	130	130	282	1030697730132	935999722944082	946522911679219	175488729889738	-0.8163	1.26	3497	0.1526	nonDE
105039813	XM_010916091,XM_010916092,XR_002163689	LOC105039813	phenylalanine--tRNA ligase, chloroplastic/mitochondrial, transcript variant X3	protein_coding	XP_010914393.1		343	377	141	133	238871163131942	271439919653784	102661331189823	827659612600539	1057	2394	3941	0.03438	upReg
105039832	XM_010916122	LOC105039832	40S ribosomal protein S21	protein_coding	XP_010914424.1	.	118	112	44	0	821772514564699	806399761305671	320361600876043	0	4274	0.6568	0.6881	0.3655	nonDE
105039839	XM_010916128,XM_010916129,XM_010916130,XM_010916131	LOC105039839	uncharacterized LOC105039839, transcript variant X1	protein_coding	XP_010914430.1		1016	983	1241	1069	70756006338791	707759790503102	903565333379931	665239192383441	-0.5472	1491	6212	0.1101	nonDE
105039840	XM_010916133,XM_010916134,XM_010916135,XM_010916137,XM_010916138,XM_019848335,XM_019848338,XM_029262934,XR_002163961,XR_003800003,XR_003800004,XR_003800005,XR_830996,XR_830997	LOC105039840	DNA mismatch repair protein PMS1, transcript variant X14	protein_coding	XP_010914435.1		235	153	168	86	163658085527715	11015996739265	122319883970853	535178396117642	0.3601	0.3925	3387	0.5521	nonDE
105039842	XM_010916141,XM_019848368,XM_029262935,XR_003800007	LOC105039842	ABC transporter C family member 14, transcript variant X4	protein_coding	XP_010914443.1		789	1266	631	494	549473316941989	91151973019016	459427659438144	307416427537343	0.5059	0.9025	5.69	0.26	nonDE
105039844	XM_029262936	LOC105039844	kinesin-like protein KIN-13A	protein_coding	XP_029118769.1	.	234	255	418	230	162961668142491	183599945654416	304343520832241	143129105938439	-0.6643	1018	4251	0.2183	nonDE
105039861	XM_010916173	LOC105039861	serine/threonine-protein phosphatase PP1	protein_coding	XP_010914475.1	.	131	94	117	180	912306774643861	676799799667259	851870620511297	112014082908344	-0.7306	1199	3137	0.1658	nonDE
105039870	XM_010916182	LOC105039870	60S ribosomal protein L18-3	protein_coding	XP_010914484.1	.	493	554	190	305	34333377091559	398879881931555	138337964014655	189801640483582	0.7666	1.78	4616	0.0741	nonDE
105039883	XM_010916194,XM_010916195,XR_003800012	LOC105039883	trafficking protein particle complex II-specific subunit 130 homolog, transcript variant X1	protein_coding	XP_010914496.1		728	799	476	532	506991856443306	57527982971717	346573004584083	331063845040216	0.2597	0.6292	5.42	0.3788	nonDE
105039888	XM_010916199,XM_010916200,XM_010916201,XM_019848638,XM_029262951	LOC105039888	probable ethylene response sensor 1, transcript variant X5	protein_coding	XP_010914501.1		588	498	221	211	409493422511901	358559893866271	160908894985467	131305397187003	0.9886	2558	4563	0.02764	upReg
105039896	XM_010916210	LOC105039896	importin subunit alpha-1b	protein_coding	XP_010914512.1	.	676	603	637	688	470778152411641	434159871488678	463796226722817	428142716894113	-0.391	1103	5489	0.1914	nonDE
105039921	XM_010916245	LOC105039921	transmembrane protein 205	protein_coding	XP_010914547.1	.	169	102	56	25	11769453810291	734399782617664	40773294656951	155575115150477	1565	0.792	2288	0.3023	nonDE
105039925	XM_010916250	LOC105039925	dihydrolipoyl dehydrogenase 2, chloroplastic	protein_coding	XP_010914552.1	.	267	240	157	86	185943441854894	172799948851215	114310843948952	535178396117642	0.8199	1.29	3.57	0.1456	nonDE
105039929	XM_010916257,XM_010916258,XM_029262965,XM_029262966,XM_029262967,XM_029262968,XM_029262969	LOC105039929	serine/threonine-protein phosphatase 4 regulatory subunit 3, transcript variant X3	protein_coding	XP_010914559.1		239	199	320	273	166443755068613	143279957589133	232990255182577	169888025744321	-0.7673	1721	4134	0.07997	nonDE
105039934	XM_019848656	LOC105039934	lon protease homolog, mitochondrial	protein_coding	XP_019704215.1	.	488	542	136	162	339851683989469	390239884488994	990208584525952	100812674617509	1447	3433	4257	0.01022	upReg
105039945	XM_010916274,XM_010916275,XM_019848775,XM_029262974	LOC105039945	solute carrier family 40 member 2, chloroplastic, transcript variant X1	protein_coding	XP_010914576.1		412	378	85	101	28692396271242	272159919440664	61888036532872	628523465207928	1743	3466	3727	0.00973	upReg
105039946	XM_010916277	LOC105039946	pentatricopeptide repeat-containing protein At2g31400, chloroplastic	protein_coding	XP_010914579.1	.	149	169	49	28	103766190398424	121679963982731	356766328248321	174244128968534	1814	1.08	2416	0.1987	nonDE
105039948	XM_010916280	LOC105039948	dual specificity protein kinase shkD-like	protein_coding	XP_010914582.3	.	78	84	161	187	543205560474971	604799820979253	117223222138734	116370186132557	-1439	2542	3039	0.02848	downReg
105039957	XM_010916291,XM_019848733	LOC105039957	protein FAR1-RELATED SEQUENCE 5, transcript variant X1	protein_coding	XP_010914593.1		220	225	253	161	153211824749351	161999952048014	184207920503725	100190374156907	-0.1869	0.2381	3874	0.7091	nonDE
105039960	XM_010916292,XM_010916293,XM_010916294,XM_010916295,XM_010916296,XM_010916298,XM_019848400,XM_019848401,XM_029262978,XM_029262979,XM_029262980,XM_029262981,XM_029262982	LOC105039960	galactokinase, transcript variant X1	protein_coding	XP_010914594.1		518	365	208	197	360744205546198	262799922211223	151443665868675	122593190738576	0.7682	1713	4359	0.08098	nonDE
105039969	XM_010916312	LOC105039969	cell division cycle 5-like protein	protein_coding	XP_010914614.1	.	115	183	113	164	800879993007969	131759960999052	822746838613475	102057275538713	-0.2673	0.3278	3284	0.6139	nonDE
105039972	XM_010916320	LOC105039972	cell division cycle 5-like protein	protein_coding	XP_010914622.1	.	156	209	113	149	108641112094994	150479955457933	822746838613475	927227686296844	0.1249	0.1536	3406	0.8023	nonDE
105039973	XM_010916321,XR_002164049	LOC105039973	probable pre-mRNA-splicing factor ATP-dependent RNA helicase DEAH2, transcript variant X2	protein_coding	XP_010914623.1	.	617	564	470	492	429689526683406	406079879800356	34220443729941	306171826616139	-0.04326	0.07807	5202	0.8995	nonDE
105039975	XM_010916324,XM_010916325	LOC105039975	importin subunit alpha-4, transcript variant X1	protein_coding	XP_010914626.1		187	116	175	156	130230051036948	835199752780873	127416545802972	970788718538978	-0.4904	0.7756	3434	0.3102	nonDE
105039980	XM_010916335,XM_010916336,XM_029262984	LOC105039980	uncharacterized LOC105039980, transcript variant X3	protein_coding	XP_010914637.1		180	199	139	117	125355129340378	143279957589133	101205142094932	728091538904233	0.2412	0.3461	3428	0.5956	nonDE
105039984	XM_010916342,XM_010916344,XM_010916345,XM_019848796,XR_831033	LOC105039984	beta-glucosidase-like SFR2, chloroplastic, transcript variant X2	protein_coding	XP_010914644.1		120	99	167	182	835700862269185	712799789011263	121591789423407	113258683829547	-1.01	2001	3256	0.0563	nonDE
105039986	XM_010916347	LOC105039986	neutral/alkaline invertase 1, mitochondrial	protein_coding	XP_010914649.1	.	114	116	669	355	793915819155726	835199752780873	487095252241075	220916663513678	-2406	3294	4035	0.01201	downReg
105039996	XM_010916354	LOC105039996	T-complex protein 1 subunit beta	protein_coding	XP_010914656.1	.	2332	2796	1559	1898	162404534234312	201311940411666	113509939946762	118112627422242	0.2339	0.4626	7177	0.4946	nonDE
105039997	XM_010916356,XM_029262989,XM_029262990,XM_029262991	LOC105039997	E3 ubiquitin-protein ligase UPL6, transcript variant X1	protein_coding	XP_010914658.1		532	552	489	440	370494048939339	397439882357795	356038233700875	27381220266484	-0.1115	0.2053	5115	0.7423	nonDE
105039998	XM_010916358,XR_831036	LOC105039998	nuclear export mediator factor NEMF, transcript variant X2	protein_coding	XP_010914660.1	.	702	579	662	767	488885004427474	416879876603557	481998590408956	477304453281664	-0.4995	1454	5541	0.1162	nonDE
105040006	XM_010916371,XM_010916372	LOC105040006	ADP-ribosylation factor, transcript variant X2	protein_coding	XP_010914673.1		796	653	527	737	55434823863856	470159860832681	383705826503807	458635439463607	-0.131	0.2557	5533	0.6885	nonDE
105040010	XM_010916376	LOC105040010	probable boron transporter 2	protein_coding	XP_010914678.1	.	146	160	96	46	101676938242751	11519996590081	698970765547731	286258211876878	0.9399	1111	2807	0.189	nonDE
105040020	XM_010916393	LOC105040020	dihydrolipoyl dehydrogenase 1, mitochondrial	protein_coding	XP_010914695.1	.	762	775	372	392	530670047540933	557999834832049	270851171649746	243941780555948	0.6698	1974	5226	0.05777	nonDE
105040024	XM_010916397	LOC105040024	protein MODIFIER OF SNC1 1	protein_coding	XP_010914699.1	.	294	301	244	324	20474671125595	216719935850899	177655069576715	201625349235018	-0.264	0.5241	4322	0.4473	nonDE
105040025	XM_010916400,XM_010916402,XM_010916403,XR_003800028,XR_003800029	LOC105040025	ubiquitin-40S ribosomal protein S27a, transcript variant X2	protein_coding	XP_010914702.1		127	118	43	43	884450079234888	849599748518474	313080655401588	267589198058821	1176	0.8206	2336	0.2909	nonDE
105040031	XM_010916411,XM_019848620,XM_019848622,XM_019848623,XM_029263008	LOC105040031	protein GFS12, transcript variant X4	protein_coding	XP_010914713.2		226	160	174	239	157390329060697	11519996590081	126688451255526	148729810083856	-0.4417	0.7997	3769	0.2985	nonDE
105040050	XM_019848683	LOC105040050	vacuolar protein sorting-associated protein 51 homolog	protein_coding	XP_019704242.1	.	154	64	103	82	107248277324545	46079986360324	74993738386892	510286377693565	-0.185	0.1477	2729	0.8103	nonDE
105040073	XM_010916447	LOC105040073	clathrin interactor EPSIN 1	protein_coding	XP_010914749.1	.	152	198	210	175	105855442554097	142559957802253	152899854963566	108902580605334	-0.4803	0.8178	3658	0.2921	nonDE
105040082	XM_010916454	LOC105040082	S-adenosylmethionine synthase	protein_coding	XP_010914756.1	.	780	1139	1792	1755	543205560474971	820079757256392	130474542902243	109213730835635	-1253	2962	6481	0.01733	downReg
105040083	XM_010916457	LOC105040083	CRS2-associated factor 2, chloroplastic	protein_coding	XP_010914759.1	.	314	239	133	133	218675058960437	172079949064335	968365748102586	827659612600539	0.7087	1441	3724	0.1186	nonDE
105040087	XM_010916461	LOC105040087	pentatricopeptide repeat-containing protein At3g06430, chloroplastic	protein_coding	XP_010914763.1	.	217	180	65	47	151122572593678	129599961638411	47326145583961	292481216482897	1571	1856	2.86	0.06732	nonDE
105040088	XM_010916462,XM_019848366,XM_029263010	LOC105040088	pto-interacting protein 1, transcript variant X1	protein_coding	XP_010914764.1		185	122	127	110	128837216266499	878399739993677	924680075255852	6845305066621	0.02547	0.02583	3207	0.9702	nonDE
105040089	XM_010916465,XM_010916466	LOC105040089	probable receptor-like protein kinase At5g18500, transcript variant X2	protein_coding	XP_010914767.1		98	118	283	216	682489037519835	849599748518474	206050756927092	134416899490012	-1531	2.73	3498	0.02244	downReg
105040093	XM_010916471	LOC105040093	uncharacterized LOC105040093	protein_coding	XP_010914773.2	.	85	111	122	190	591954777440673	79919976343687	888275347883575	118237087514363	-1005	1649	3076	0.08872	nonDE
105040096	XM_010916475	LOC105040096	suppressor of mec-8 and unc-52 protein homolog 1	protein_coding	XP_010914777.1	.	341	432	418	342	237478328361494	311039907932187	304343520832241	212826757525853	-0.3137	0.5798	4719	0.4086	nonDE
105040098	XM_010916477	LOC105040098	CBL-interacting protein kinase 1	protein_coding	XP_010914779.1	.	533	481	1540	1554	371190466324563	34631989748931	112126560306615	967054915775366	-1952	5073	5934	0.001807	downReg
105040103	XM_010916485	LOC105040103	ATP-dependent 6-phosphofructokinase 3	protein_coding	XP_010914787.1	.	361	256	109	101	25140667606598	184319945441296	793623056715653	628523465207928	1206	2283	3629	0.03986	upReg
105040104	XM_010916482,XR_003800037	LOC105040104	protein transport protein SEC23, transcript variant X2	protein_coding	XP_010914784.1	.	502	501	408	419	349601527382609	360719893226912	297062575357786	2607438929922	-0.0597	0.1068	4976	0.8615	nonDE
105040105	XM_010916483,XR_002163686	LOC105040105	protein translocase subunit SECA1, chloroplastic, transcript variant X2	protein_coding	XP_010914785.1	.	1059	1137	455	638	737506010952556	818639757682632	331283019087727	397027693864018	0.6834	1938	5731	0.05994	nonDE
105040121	XM_010916509	LOC105040121	mitochondrial-processing peptidase subunit alpha	protein_coding	XP_010914811.1	.	800	751	356	388	557133908179457	540719839946927	259201658890617	241452578713541	0.7208	2161	5213	0.04596	upReg
105040123	XM_010916510,XM_019848379	LOC105040123	mediator of RNA polymerase II transcription subunit 13, transcript variant X1	protein_coding	XP_010914812.1		506	449	427	566	352387196923506	323279904309148	310896371759251	35222206070068	-0.3863	0.9875	5064	0.2282	nonDE
105040125	XM_010916513,XM_010916514,XM_010916515	LOC105040125	flap endonuclease 1, transcript variant X3	protein_coding	XP_010914815.1		221	207	140	177	153908242134575	149039955884173	101933236642377	110147181526538	0.09796	0.1404	3667	0.8187	nonDE
105040130	XM_010916519,XM_010916520	LOC105040130	nuclear pore complex protein NUP98A, transcript variant X1	protein_coding	XP_010914821.1		356	283	108	142	247924589139858	203759939687058	786342111241197	883666654054711	1009	2171	3779	0.04561	upReg
105040132	XM_010916525,XM_010916527,XM_010916528	LOC105040132	phytochrome A, transcript variant X3	protein_coding	XP_010914827.1		88	80	431	296	612847298997403	575999829504051	313808749949033	184200936338165	-2.41	3519	3584	0.00924	downReg
105040133	XM_029263027	LOC105040133	glutamate--tRNA ligase, cytoplasmic	protein_coding	XP_029118860.1	.	378	302	211	365	263245771614793	217439935637779	153627949511012	227139668119697	-0.06697	0.0895	4404	0.8845	nonDE
105040135	XM_010916534	LOC105040135	DEAD-box ATP-dependent RNA helicase 50	protein_coding	XP_010914836.1	.	178	215	87	52	123962294569929	154799954179214	633442256277631	323596239512993	1253	1689	2993	0.08405	nonDE
105040139	XM_010916539,XM_029263031,XR_831053	LOC105040139	glucose-1-phosphate adenylyltransferase large subunit 4, chloroplastic/amyloplastic, transcript variant X1	protein_coding	XP_010914841.1		160	182	84	92	111426781635891	131039961212171	611599419854265	572516423753756	0.6135	0.9657	3086	0.2365	nonDE
105040167	gene-LOC105040167	LOC105040167	.	pseudogene	.	.	528	426	287	533	367708379398442	306719909210907	208963135116874	331686145500817	-0.07041	0.09504	4896	0.8769	nonDE
105040172	XM_010916578	LOC105040172	uncharacterized protein At2g34160	protein_coding	XP_010914880.1	.	217	195	118	189	151122572593678	140399958441612	859151565985753	117614787053761	0.1084	0.142	3601	0.817	nonDE
105040177	XM_010916588	LOC105040177	probable cellulose synthase A catalytic subunit 1 [UDP-forming]	protein_coding	XP_010914890.1	.	1870	2805	4332	3166	130230051036948	201959940219858	315410557953414	197020325826564	-1036	1929	7652	0.06067	nonDE
105040178	XM_010916589	LOC105040178	ABC transporter C family member 3	protein_coding	XP_010914891.1	.	121	127	47	42	842665036121429	91439972933768	34220443729941	261366193452802	1.16	0.8438	2368	0.2823	nonDE
105040183	XM_010916594,XM_010916596	LOC105040183	protein OVEREXPRESSOR OF CATIONIC PEROXIDASE 3, transcript variant X2	protein_coding	XP_010914896.1		186	209	108	130	129533633651724	150479955457933	786342111241197	808990598782482	0.388	0.6447	3404	0.3712	nonDE
105040185	XM_010916599	LOC105040185	NADH-cytochrome b5 reductase-like protein	protein_coding	XP_010914901.1	.	238	156	135	169	165747337683388	11231996675329	982927639051497	105168777841723	0.01053	0.01179	3562	0.9865	nonDE
105040189	XM_010916608,XR_003800869	LOC105040189	mitogen-activated protein kinase kinase 1, transcript variant X2	protein_coding	XP_010914910.1	.	201	147	210	261	139979894430089	105839968671369	152899854963566	162420420217098	-0.7832	1699	3795	0.08284	nonDE
105040196	XM_010916617	LOC105040196	acyl-protein thioesterase 2	protein_coding	XP_010914919.1	.	669	415	190	317	465903230715071	298799911555226	138337964014655	197269246010805	0.7535	1441	4636	0.1186	nonDE
105040198	XM_010916618,XM_010916619	LOC105040198	peptidyl-prolyl cis-trans isomerase CYP95, transcript variant X2	protein_coding	XP_010914920.1		345	440	236	307	240263997902391	316799906227228	171830313197151	191046241404786	0.1867	0.317	4485	0.6253	nonDE
105040199	XM_010916621,XM_010916622,XM_010916623,XM_010916624,XM_019849466,XM_029263088,XM_029263089,XM_029263090,XR_003800107,XR_003800108,XR_003800109,XR_831076	LOC105040199	(6-4)DNA photolyase, transcript variant X9	protein_coding	XP_010914923.1		487	464	94	127	339155266604244	334079901112349	68440887459882	790321584964424	1767	3746	3.98	0.007311	upReg
105040203	XM_010916627	LOC105040203	GTP-binding nuclear protein Ran1B	protein_coding	XP_010914929.1	.	1356	1232	433	651	94434197436418	887039737436238	315264939043925	405117599851843	0.9387	2609	5839	0.02569	upReg
105040207	XM_010916632,XM_010916633,XM_019849553	LOC105040207	probable 1-deoxy-D-xylulose-5-phosphate synthase, chloroplastic, transcript variant X3	protein_coding	XP_010914934.1		501	292	255	330	348905109997385	210239937768978	185664109598616	20535915199863	0.05892	0.07441	4526	0.9035	nonDE
105040208	XM_010916634,XM_010916635,XM_019848805,XM_029263091	LOC105040208	protein FAR1-RELATED SEQUENCE 5, transcript variant X4	protein_coding	XP_010914936.1		96	143	132	104	668560689815348	102959969523849	96108480262813	647192479025985	-0.3304	0.3917	3022	0.5527	nonDE
105040209	XM_010916637	LOC105040209	26S proteasome regulatory subunit 8 homolog A	protein_coding	XP_010914939.2	.	425	351	340	165	295977388720337	252719925194902	247552146131488	102679575999315	0.3881	0.5023	4387	0.4631	nonDE
105040210	XM_010916638	LOC105040210	serine-threonine kinase receptor-associated protein	protein_coding	XP_010914940.1	.	129	179	76	172	898378426939374	128879961851531	55335185605862	107035679223528	0.02499	0.02136	3192	0.9744	nonDE
105040227	XM_010916652,XM_010916653	LOC105040227	protein FAR1-RELATED SEQUENCE 5, transcript variant X1	protein_coding	XP_010914954.1		208	192	80	143	144854816126659	138239959080972	582475637956443	88988965866073	0.5332	0.8396	3341	0.2831	nonDE
105040239	XM_010916671,XM_010916672,XM_019848957	LOC105040239	ABC transporter G family member 36, transcript variant X1	protein_coding	XP_010914973.1		49	128	359	248	341244518759917	921599727206481	261385942532954	154330514229273	-2258	2742	3414	0.02207	downReg
105040240	XM_010916673	LOC105040240	ABC transporter G family member 39	protein_coding	XP_010914975.1	.	275	546	1251	2309	191514780936688	393119883636514	910846278854387	143689176352981	-2467	3911	5809	0.005807	downReg
105040243	XM_010916677,XM_019849378	LOC105040243	transcriptional corepressor LEUNIG, transcript variant X1	protein_coding	XP_010914979.2		582	515	240	385	405314918200555	370799890243232	174742691386933	239585677331735	0.4986	1141	4818	0.1815	nonDE
105040249	XM_010916692,XM_010916693,XM_010916694,XM_019849495,XM_029263109,XM_029263110,XM_029263111,XM_029263112,XM_029263113,XM_029263114,XM_029263115,XM_029263116,XM_029263117	LOC105040249	uncharacterized LOC105040249, transcript variant X9	protein_coding	XP_010914994.1		146	138	122	58	101676938242751	993599705894487	888275347883575	360934267149107	0.4669	0.504	2922	0.4621	nonDE
105040257	XM_010916712,XM_010916714	LOC105040257	palmitoyl-acyl carrier protein thioesterase, chloroplastic, transcript variant X2	protein_coding	XP_010915014.1		463	477	351	566	322441249358861	34343989834179	255561186153389	35222206070068	-0.2705	0.5351	4983	0.4397	nonDE
105040260	XM_010916719,XM_010916720,XM_029263125	LOC105040260	uncharacterized LOC105040260, transcript variant X1	protein_coding	XP_010915021.1		398	424	340	502	27717411931928	305279909637147	247552146131488	312394831222158	-0.3538	0.7829	4832	0.3069	nonDE
105040265	XM_010916721	LOC105040265	acyl transferase 9	protein_coding	XP_010915023.1	.	51	102	180	209	355172866464404	734399782617664	1310570185402	130060796265799	-1781	2598	3037	0.0259	downReg
105040266	XM_010916722	LOC105040266	syntaxin-32	protein_coding	XP_010915024.1	.	155	184	147	218	10794469470977	132479960785932	107029898474496	135661500411216	-0.4332	0.7521	3.59	0.3191	nonDE
105040267	XM_010916724	LOC105040267	46 kDa FK506-binding nuclear protein	protein_coding	XP_010915026.1	.	281	236	129	133	195693285248034	169919949703695	939241966204764	827659612600539	0.639	1313	3669	0.1415	nonDE
105040273	XM_029264521,XM_029264523,XM_029264525,XR_003800861	LOC105040273	probable glutamate carboxypeptidase LAMP1, transcript variant X4	protein_coding	XP_029120354.1		70	58	151	120	487492169657025	417599876390437	109942276664279	746760552722291	-1391	1849	2685	0.06802	nonDE
105040274	XM_010916732	LOC105040274	uncharacterized LOC105040274	protein_coding	XP_010915034.3	.	231	305	193	244	160872415986818	219599934998419	140522247656992	151841312386866	-0.05598	0.074	4054	0.9041	nonDE
105040278	XM_010916737	LOC105040278	UDP-galactose/UDP-glucose transporter 3	protein_coding	XP_010915039.1	.	165	192	12	41	114908868562013	138239959080972	0.873713456934664	255143188846783	2539	0.8631	2138	0.2747	nonDE
105040281	XM_010916740,XM_010916741,XM_019849502	LOC105040281	nuclear pore complex protein NUP50A, transcript variant X3	protein_coding	XP_010915042.1		83	123	106	62	578026429736187	885599737862478	771780220292286	385826285573184	0.00779	0.005639	2652	0.993	nonDE
105040286	XM_010916750,XM_029263134,XR_002164317	LOC105040286	DNA mismatch repair protein MSH7, transcript variant X1	protein_coding	XP_010915052.1		158	149	29	69	110033946865443	107279968245129	21114741875921	429387317815317	1327	0.9935	2527	0.2262	nonDE
105040287	XM_010916752	LOC105040287	heat shock 70 kDa protein 14	protein_coding	XP_010915054.1	.	535	442	105	156	372583301095012	318239905800988	764499274817831	970788718538978	1.57	3424	4.11	0.01025	upReg
105040294	XM_010916764	LOC105040294	protein GIGANTEA	protein_coding	XP_010915066.1	.	10051	7729	2899	3824	699969113888965	556487835279601	211074609304466	23796769613417	1067	2.35	8547	0.03612	upReg
105040300	XM_010916769	LOC105040300	S-adenosylmethionine carrier 1, chloroplastic/mitochondrial	protein_coding	XP_010915071.1	.	399	387	88	185	277870536704504	278639917522584	640723201752087	115125585211353	1249	2391	3954	0.03438	upReg
105040307	XM_010916779,XM_010916780	LOC105040307	DEAD-box ATP-dependent RNA helicase 39, transcript variant X1	protein_coding	XP_010915081.2		212	180	112	116	147640485667556	129599961638411	815465893139019	721868534298214	0.4411	0.7555	3.37	0.3182	nonDE
105040308	XM_010916781	LOC105040308	polyadenylate-binding protein 3	protein_coding	XP_010915083.1	.	801	799	778	731	557830325564681	57527982971717	56645755791264	454901636699995	-0.253	0.6109	5746	0.3882	nonDE
105040309	XM_010916782	LOC105040309	translation factor GUF1 homolog, mitochondrial	protein_coding	XP_010915084.1	.	186	183	108	129	129533633651724	131759960999052	786342111241197	802767594176463	0.2996	0.4756	3354	0.4845	nonDE
105040310	XM_010916784,XM_010916785,XM_010916786,XM_010916788	LOC105040310	ubiquitin-conjugating enzyme E2 2, transcript variant X1	protein_coding	XP_010915086.1		394	365	278	378	274388449778383	262799922211223	202410284189864	235229574107522	-0.1181	0.21	4599	0.7363	nonDE
105040318	XM_010916801,XM_010916804,XM_019849254,XM_019849255,XM_019849256,XM_019849257,XM_019849258,XM_019849259,XM_029263138,XM_029263140	LOC105040318	probable serine/threonine-protein kinase PIX7, transcript variant X8	protein_coding	XP_010915103.1		139	173	92	87	968020165461806	124559963130251	669846983649909	541401400723661	0.458	0.6326	3.03	0.3769	nonDE
105040320	XM_010916806,XM_010916807	LOC105040320	uncharacterized LOC105040320, transcript variant X1	protein_coding	XP_010915108.1		226	196	86	73	157390329060697	141119958228492	626161310803176	454279336239393	1084	1823	3163	0.07044	nonDE
105040321	XM_010916809	LOC105040321	phosducin-like protein 3	protein_coding	XP_010915111.1	.	201	147	70	137	139979894430089	105839968671369	509666183211887	852551631024615	0.4387	0.5654	3169	0.4184	nonDE
105040322	XM_010916810,XM_029263142	LOC105040322	FACT complex subunit SSRP1-A, transcript variant X1	protein_coding	XP_010915112.1		193	158	104	58	134408555348294	11375996632705	757218329343375	360934267149107	0.8725	1.18	3014	0.1711	nonDE
105040328	XM_010916818	LOC105040328	uncharacterized LOC105040328	protein_coding	XP_010915120.1	.	250	221	121	85	17410434630608	159119952900494	880994402409119	528955391511623	0.8983	1571	3419	0.09845	nonDE
105040359	XM_010916839,XM_019849429	LOC105040359	glutamine--tRNA ligase, transcript variant X1	protein_coding	XP_010915141.1		149	128	51	9	103766190398424	921599727206481	371328219197232	0.560070414541718	2459	0.8001	1935	0.2985	nonDE
105040371	XM_010916862	LOC105040371	protein KINESIN LIGHT CHAIN-RELATED 1	protein_coding	XP_010915164.1	.	53	103	98	134	36910121416889	741599780486465	713532656496642	833882617206558	-0.9988	1259	2676	0.1526	nonDE
105040379	XM_010916870	LOC105040379	serine/threonine-protein phosphatase PP2A-1 catalytic subunit	protein_coding	XP_010915172.1	.	243	170	161	180	16922942460951	122399963769611	117223222138734	112014082908344	-0.08111	0.1064	3687	0.8617	nonDE
105040381	XM_010916871	LOC105040381	17.3 kDa class II heat shock protein	protein_coding	XP_010915173.1	.	669	517	0	0	465903230715071	372239889816993	0	0	9863	1847	0.2442	0.06818	nonDE
105040383	XM_010916873	LOC105040383	aminopeptidase M1	protein_coding	XP_010915175.1	.	1109	1066	635	695	772326880213772	767519772814147	462340037627926	432498820118327	0.3713	1052	5876	0.2076	nonDE
105040388	XM_010916891,XM_010916892	LOC105040388	mitogen-activated protein kinase kinase 2, transcript variant X1	protein_coding	XP_010915193.1		231	156	178	173	160872415986818	11231996675329	129600829445308	10765797968413	-0.219	0.3209	3659	0.6213	nonDE
105040389	XM_010916894	LOC105040389	transcriptional elongation regulator MINIYO	protein_coding	XP_010915196.1	.	151	101	113	104	105159025168872	727199784748864	822746838613475	647192479025985	-0.1334	0.1455	3004	0.813	nonDE
105040392	XM_010916900	LOC105040392	elongation factor 2	protein_coding	XP_010915202.1	.	3162	3352	1322	1854	22020717720793	241343928562197	962540991723021	115374505395594	0.7216	1794	7284	0.0728	nonDE
105040393	XM_010916899	LOC105040393	protein ALP1-like	protein_coding	XP_010915201.2	.	255	267	2290	4441	177586433232202	192239943096977	166733651365032	276363634553308	-3939	6155	5978	0.000741	downReg
105040397	XM_010916902,XM_010916903,XM_019849613	LOC105040397	uncharacterized protein YwkD, transcript variant X1	protein_coding	XP_010915204.1		422	375	91	110	293888136564664	269999920080024	662566038175453	6845305066621	1643	3392	3788	0.01041	upReg
105040399	XM_010916904	LOC105040399	(S)-coclaurine N-methyltransferase	protein_coding	XP_010915206.1	.	241	252	140	214	167836589839061	181439946293776	101933236642377	133172298568809	0.1593	0.2366	3837	0.7108	nonDE
105040400	XM_010916905	LOC105040400	uncharacterized LOC105040400	protein_coding	XP_010915207.1	.	351	305	453	278	244442502213737	219599934998419	329826829992836	172999528047331	-0.4415	0.7226	4558	0.3323	nonDE
105040405	XM_010916911,XR_831108	LOC105040405	DEAD-box ATP-dependent RNA helicase 20, transcript variant X2	protein_coding	XP_010915213.1	.	293	322	101	208	204050293870726	23183993137538	735375492920009	129438495805197	0.7158	1251	3868	0.1544	nonDE
105040419	XM_010916926,XM_010916927	LOC105040419	beta-galactosidase, transcript variant X1	protein_coding	XP_010915228.1		28	177	1269	482	19499686786281	127439962277771	923951980708407	29994882201012	-3847	2558	4026	0.02764	downReg
105040429	XM_010916941,XM_010916942	LOC105040429	V-type proton ATPase subunit B 2, transcript variant X1	protein_coding	XP_010915243.1		731	629	293	362	509081108598979	45287986594756	213331702401547	225272766737891	0.7155	2037	5022	0.05406	nonDE
105040431	XM_010916945	LOC105040431	transmembrane 9 superfamily member 7	protein_coding	XP_010915247.1	.	231	286	234	130	160872415986818	205919939047698	170374124102259	808990598782482	0.2352	0.2749	3873	0.6669	nonDE
105040432	XM_010916947	LOC105040432	eukaryotic initiation factor 4A-8	protein_coding	XP_010915249.1	.	819	611	503	475	570365838498719	439919869783719	366231557365113	295592718785907	0.1974	0.3948	5345	0.5499	nonDE
105040445	XM_010916970,XM_010916973,XM_019849304,XM_019849306,XM_019849307,XM_029263173,XM_029263174,XM_029263175,XM_029263176,XM_029263177,XM_029263178,XM_029263179,XM_029263180	LOC105040445	calumenin, transcript variant X13	protein_coding	XP_010915272.1		99	88	195	185	689453211372078	633599812454456	141978436751883	115125585211353	-1355	2527	3206	0.02881	downReg
105040447	XM_010916975	LOC105040447	protein indeterminate-domain 7	protein_coding	XP_010915277.1	.	347	315	222	185	241656832672839	22679993286722	161636989532913	115125585211353	0.3727	0.7266	4162	0.3308	nonDE
105040452	XM_010916984,XM_010916985	LOC105040452	BTB/POZ domain and ankyrin repeat-containing protein NPR1, transcript variant X2	protein_coding	XP_010915286.1		148	118	43	15	1030697730132	849599748518474	313080655401588	0.933450690902863	2118	0.8053	2019	0.2963	nonDE
105040454	XM_019855054,XR_002166122,XR_003800841,XR_003800842	LOC105040454	MMS19 nucleotide excision repair protein homolog, transcript variant X4	protein_coding	XP_019710613.1	.	144	136	83	126	100284103472302	979199710156886	604318474379809	784098580358405	0.09387	0.1048	3052	0.8642	nonDE
105040455	XM_010916986,XM_010916987,XM_019849635,XR_003800133,XR_003800134,XR_003800135,XR_003800136,XR_003800137,XR_003800138,XR_003800139,XR_003800140,XR_003800141,XR_003800142,XR_003800143,XR_003800144	LOC105040455	heat shock factor protein HSF30, transcript variant X12	protein_coding	XP_010915288.1		309	264	0	0	215192972034315	190079943736337	0	0	8822	1721	-0.2762	0.07997	nonDE
105040466	XM_010917000,XM_010917001,XM_010917002	LOC105040466	uncharacterized LOC105040466, transcript variant X1	protein_coding	XP_010915302.1		39	132	682	927	271602780237485	950399718681683	496560481357867	57687252697797	-3834	4406	4.05	0.003539	downReg
105040475	XM_010917014,XM_010917015,XM_010917016	LOC105040475	serine/threonine protein phosphatase 2A 55 kDa regulatory subunit B beta isoform, transcript variant X2	protein_coding	XP_010915316.1		120	162	172	196	835700862269185	11663996547457	125232262160635	121970890277974	-0.7413	1425	3.47	0.1211	nonDE
105040486	XM_010917036	LOC105040486	ABC transporter C family member 8	protein_coding	XP_010915338.1	.	399	448	44	51	277870536704504	322559904522268	320361600876043	317373234906974	2.8	2651	3297	0.02453	upReg
105040491	XM_010917043	LOC105040491	40S ribosomal protein S24-1	protein_coding	XP_010915345.1	.	200	117	60	0	139283477044864	842399750649674	436856728467332	0	4471	0.5801	1004	0.4085	nonDE
105040501	XM_010917050,XR_003800148	LOC105040501	ATP-dependent 6-phosphofructokinase 3, transcript variant X1	protein_coding	XP_010915352.1	.	323	411	337	420	224942815427456	295919912407706	245367862489151	261366193452802	-0.39	0.8518	4678	0.279	nonDE
105040502	XM_010917055,XM_010917062,XM_029264467	LOC105040502	NADP-dependent malic enzyme, transcript variant X3	protein_coding	XP_010915357.1		1208	1065	872	769	84127220135098	766799773027267	634898445372522	478549054202868	0.1311	0.257	6057	0.6874	nonDE
105040517	XM_010917072,XM_010917073,XM_010917074,XM_029263203,XM_029263204	LOC105040517	nuclear poly(A) polymerase 4, transcript variant X1	protein_coding	XP_010915374.1		370	450	368	196	257674432532999	323999904096028	267938793459964	121970890277974	0.2832	0.36	4517	0.5827	nonDE
105040520	XM_010917077	LOC105040520	hexokinase-2	protein_coding	XP_010915379.1	.	44	68	374	193	306423649498701	489599855078443	272307360744637	120103988896168	-2638	2078	3073	0.05139	nonDE
105040526	XM_010917083	LOC105040526	clavaminate synthase-like protein At3g21360	protein_coding	XP_010915385.1	.	187	155	34	95	130230051036948	11159996696641	247552146131488	591185437571813	1073	1124	2773	0.1854	nonDE
105040527	XM_010917084,XM_010917085,XM_010917086,XM_010917087,XM_010917088,XM_010917089,XM_019849536,XM_019849537,XM_029263206,XM_029263208,XM_029263209	LOC105040527	uncharacterized protein C3F10.06c, transcript variant X4	protein_coding	XP_010915386.1		124	122	94	142	863557557678158	878399739993677	68440887459882	883666654054711	-0.2659	0.3518	3047	0.5902	nonDE
105040528	XM_010917090,XM_010917095,XR_003800834,XR_003800835,XR_003800836,XR_003800837	LOC105040528	uncharacterized LOC105040528, transcript variant X3	protein_coding	XP_010915392.1		147	160	164	201	102373355627975	11519996590081	119407505781071	125082392580984	-0.5864	1185	3.53	0.1699	nonDE
105040529	XM_010917091	LOC105040529	40S ribosomal protein S24-1	protein_coding	XP_010915393.1	.	115	110	39	33	800879993007969	791999765568069	283956873503766	20535915199863	1325	0.7204	2146	0.3332	nonDE
105040536	XM_010917099	LOC105040536	ABC transporter G family member 42	protein_coding	XP_010915401.1	.	87	90	227	307	605883125145159	647999808192057	165277462270141	191046241404786	-1918	3493	3405	0.009528	downReg
105040538	XM_010917102	LOC105040538	casein kinase 1-like protein HD16	protein_coding	XP_010915404.1	.	926	866	584	834	644882498717721	623519815438135	425207215708203	518998584141992	0.01816	0.03042	5771	0.9644	nonDE
105040545	XM_010917111,XM_010917112,XM_019849365,XR_003800170,XR_003800171,XR_831161,XR_831162,XR_831163	LOC105040545	phosphoribosylaminoimidazole carboxylase, chloroplastic, transcript variant X8	protein_coding	XP_010915413.1		303	307	108	121	211014467722969	221039934572179	786342111241197	75298355732831	1072	2339	3693	0.0366	upReg
105040554	XM_010917119,XM_010917120,XM_010917121,XM_010917123	LOC105040554	probable serine/threonine-protein kinase At1g54610, transcript variant X2	protein_coding	XP_010915421.1		136	130	131	95	947127643905077	935999722944082	953803857153675	591185437571813	-0.06253	0.06488	3078	0.9159	nonDE
105040568	XM_010917149	LOC105040568	serine/threonine-protein phosphatase 5	protein_coding	XP_010915451.1	.	220	221	218	194	153211824749351	159119952900494	158724611343131	12072628935677	-0.2341	0.3919	3881	0.5526	nonDE
105040587	XM_010917176	LOC105040587	60S ribosomal protein L11	protein_coding	XP_010915478.1	.	298	204	96	120	207532380796848	146879956523533	698970765547731	746760552722291	0.8549	1537	3494	0.1022	nonDE
105040589	XM_010917178	LOC105040589	ras-related protein RIC2	protein_coding	XP_010915480.1	.	114	239	197	180	793915819155726	172079949064335	143434625846774	112014082908344	-0.5335	0.6909	3.61	0.3471	nonDE
105040590	XM_019848947,XR_003800183,XR_003800184	LOC105040590	uncharacterized LOC105040590, transcript variant X1	protein_coding	XP_019704506.1	.	1573	1637	609	773	109546454695786	117863965112266	443409579394342	481038256045276	0.8855	2.65	6.18	0.02455	upReg
105040592	XM_010917182,XM_010917183,XM_019849644,XR_831187,XR_831188,XR_831191	LOC105040592	probable sugar phosphate/phosphate translocator At1g06470, transcript variant X1	protein_coding	XP_010915484.1		69	145	134	121	480527995804782	104399969097609	975646693577041	75298355732831	-0.6951	0.8535	2969	0.2784	nonDE
105040604	XM_010917196,XM_019849160,XM_029263238	LOC105040604	protein MALE DISCOVERER 2, transcript variant X3	protein_coding	XP_010915498.1		126	104	31	0	877485905382645	748799778355266	225709309708121	0	4.52	0.7044	0.5605	0.3419	nonDE
105040610	XM_010917204	LOC105040610	low-temperature-induced cysteine proteinase	protein_coding	XP_010915506.1	.	212	189	23	59	147640485667556	136079959720332	167461745912477	367157271755126	1999	1235	2.58	0.158	nonDE
105040611	XM_010917206,XM_010917207	LOC105040611	probable serine/threonine-protein kinase SIS8, transcript variant X1	protein_coding	XP_010915508.1		185	206	199	197	128837216266499	148319956097293	144890814941665	122593190738576	-0.3582	0.6634	3766	0.3617	nonDE
105040615	XM_019845762,XM_029264428,XM_029264429,XM_029264435	LOC105040615	kinesin-like protein KIN-14C, transcript variant X2	protein_coding	XP_019701321.1		104	121	174	126	724274080633294	871199742124876	126688451255526	784098580358405	-0.7257	1132	3159	0.1834	nonDE
105040616	XM_010917213	LOC105040616	phosphoenolpyruvate carboxylase, housekeeping isozyme	protein_coding	XP_010915515.1	.	1639	1979	778	578	114142809438266	142487957823564	56645755791264	359689666227903	1091	2.52	6246	0.02905	upReg
105040619	XM_010917220,XM_010917221,XM_019848958	LOC105040619	putative lipase YDR444W, transcript variant X1	protein_coding	XP_010915522.1		198	139	82	66	137890642274416	100079970376329	597037528905354	41071830399726	0.8548	1188	2938	0.169	nonDE
105040620	XM_010917224,XM_010917225	LOC105040620	14-3-3-like protein D, transcript variant X1	protein_coding	XP_010915526.1		262	296	113	326	182461354928772	213119936916499	822746838613475	202869950156222	0.173	0.1694	4	0.7835	nonDE
105040625	XM_029263242	LOC105040625	mitogen-activated protein kinase 1	protein_coding	XP_029119075.1	.	120	98	201	90	835700862269185	705599791142462	146347004036556	560070414541718	-0.6041	0.6334	3066	0.3765	nonDE
105040627	XM_019854237,XM_029264409,XM_029264411,XM_029264413,XM_029264414,XM_029264415,XM_029264416	LOC105040627	casein kinase 1-like protein HD16, transcript variant X7	protein_coding	XP_019709796.1		558	559	596	557	388600900955171	402479880865955	43394435027755	346621356555263	-0.3822	0.9878	5293	0.2281	nonDE
105040640	XM_010917261	LOC105040640	mannosyl-oligosaccharide 1,2-alpha-mannosidase MNS3	protein_coding	XP_010915563.1	.	84	107	127	92	58499060358843	770399771961667	924680075255852	572516423753756	-0.5098	0.6279	2812	0.3793	nonDE
105040647	XM_010917275,XR_002164303,XR_002164304	LOC105040647	probable pre-mRNA-splicing factor ATP-dependent RNA helicase DEAH9, transcript variant X3	protein_coding	XP_010915577.1	.	328	309	214	311	228424902353577	222479934145939	155812233153348	193535443247194	-0.0437	0.06372	4309	0.917	nonDE
105040648	XM_010917276	LOC105040648	sodium/calcium exchanger NCL1	protein_coding	XP_010915578.1	.	144	176	365	201	100284103472302	126719962490891	265754509817627	125082392580984	-1086	1685	3845	0.08465	nonDE
105040656	XM_010917291	LOC105040656	magnesium-chelatase subunit ChlI, chloroplastic	protein_coding	XP_010915593.1	.	174	203	128	141	121176625029032	146159956736653	931961020730308	877443649448692	0.1428	0.197	3.46	0.7519	nonDE
105040672	XM_010917328,XR_002166328,XR_002166330,XR_002166331,XR_002166332,XR_002166333,XR_003800814,XR_003800818	LOC105040672	golgin-84, transcript variant X3	protein_coding	XP_010915630.1	.	200	180	146	173	139283477044864	129599961638411	106301803927051	10765797968413	-0.08556	0.1199	3588	0.8458	nonDE
105040675	XM_010917355,XM_010917427,XM_010917579,XM_019854038	LOC105040675	transcriptional corepressor LEUNIG, transcript variant X1	protein_coding	XP_010915657.1		668	569	431	574	465206813329847	409679878734756	313808749949033	357200464385496	-0.03239	0.05511	5258	0.9269	nonDE
105040679	XM_010917327	LOC105040679	protein DJ-1 homolog B	protein_coding	XP_010915629.1	.	182	184	117	128	126747964110826	132479960785932	851870620511297	796544589570443	0.2403	0.3665	3374	0.5767	nonDE
105040690	XM_010917342,XR_831212	LOC105040690	isocitrate dehydrogenase [NADP], transcript variant X1	protein_coding	XP_010915644.1	.	80	147	68	178	557133908179457	105839968671369	495104292262976	11076948198714	-0.4226	0.377	2922	0.5676	nonDE
105040691	XM_010917345,XM_029263251	LOC105040691	histone-lysine N-methyltransferase ATX4, transcript variant X2	protein_coding	XP_010915647.1		270	290	184	202	188032694010567	208799938195218	133969396729982	125704693041586	0.196	0.3402	4006	0.6015	nonDE
105040700	XM_010917352,XM_029263254	LOC105040700	long chain acyl-CoA synthetase 4, transcript variant X1	protein_coding	XP_010915654.1		206	162	277	297	14346198135621	11663996547457	201682189642418	184823236798767	-0.9853	2359	3985	0.03591	downReg
105040703	XM_019849276,XM_019849277,XM_019849278,XM_029263255,XM_029263256,XM_029263257,XR_002164274,XR_002164275	LOC105040703	spermine synthase, transcript variant X6	protein_coding	XP_019704835.1		112	97	104	135	77998747145124	698399793273661	757218329343375	840105621812577	-0.5285	0.817	2946	0.2923	nonDE
105040706	XM_010917361	LOC105040706	cyclic nucleotide-gated ion channel 1	protein_coding	XP_010915663.1	.	179	158	168	250	124658711955153	11375996632705	122319883970853	155575115150477	-0.6293	1267	3684	0.1512	nonDE
105040707	XM_010917362,XM_010917363,XM_010917364,XM_019849563	LOC105040707	uncharacterized LOC105040707, transcript variant X4	protein_coding	XP_010915664.1		511	370	395	269	355869283849628	266399921145623	287597346240993	167398823901914	0.0911	0.1178	4702	0.8475	nonDE
105040716	XM_010917373	LOC105040716	rhodanese-like domain-containing protein 4, chloroplastic	protein_coding	XP_010915675.1	.	278	211	128	107	193604033092361	151919955031693	931961020730308	665861492844043	0.7255	1324	3544	0.1396	nonDE
105040742	XM_010917409,XM_019849245,XM_019849246	LOC105040742	ubiquitin-conjugating enzyme E2 10, transcript variant X3	protein_coding	XP_010915711.1		2014	1802	1530	3024	140258461384178	129743961595787	11139846575917	188183659286017	-0.5029	0.9263	7127	0.2503	nonDE
105040746	XM_010917420,XM_010917421	LOC105040746	uncharacterized LOC105040746, transcript variant X1	protein_coding	XP_010915722.1		185	109	111	63	128837216266499	784799767699269	808184947664564	392049290179203	0.4728	0.4876	2918	0.4743	nonDE
105040747	XM_010917422	LOC105040747	ABC transporter C family member 10	protein_coding	XP_010915724.1	.	257	366	109	117	178979268002651	263519921998103	793623056715653	728091538904233	1096	2006	3688	0.05621	nonDE
105040749	XM_010917423	LOC105040749	ABC transporter C family member 10	protein_coding	XP_010915725.1	.	191	216	92	131	133015720577845	155519953966094	669846983649909	815213603388501	0.5307	0.898	3371	0.2622	nonDE
105040753	XM_010917426,XM_029263263,XM_029263264,XM_029263265	LOC105040753	BTB/POZ domain-containing protein POB1, transcript variant X4	protein_coding	XP_010915728.1		192	164	171	262	13371213796307	11807996504833	12450416761319	1630427206777	-0.599	1184	3746	0.1702	nonDE
105040763	XM_010917444	LOC105040763	50S ribosomal protein L21, chloroplastic	protein_coding	XP_010915746.1	.	148	146	47	0	1030697730132	105119968884489	34220443729941	0	4.58	0.7149	0.8883	0.3366	nonDE
105040768	XM_010917451,XR_003800223,XR_003800224,XR_003800225	LOC105040768	uroporphyrinogen decarboxylase 1, chloroplastic, transcript variant X4	protein_coding	XP_010915753.1	.	305	201	123	107	212407302493418	144719957162893	89555629335803	665861492844043	0.7858	1355	3545	0.1328	nonDE
105040769	XM_010917452	LOC105040769	uncharacterized LOC105040769	protein_coding	XP_010915754.3	.	106	108	73	140	738202428337781	777599769830468	531509019635254	871220644842673	-0.2913	0.324	2851	0.6176	nonDE
105040772	XM_010917458	LOC105040772	post-GPI attachment to proteins factor 3	protein_coding	XP_010915760.1	.	131	100	95	127	912306774643861	719999786880063	691689820073275	790321584964424	-0.2845	0.3683	2959	0.575	nonDE
105040773	XM_010917461,XM_010917469	LOC105040773	ultraviolet-B receptor UVR8, transcript variant X1	protein_coding	XP_010915763.1		169	176	84	132	11769453810291	126719962490891	611599419854265	82143660799452	0.3495	0.5048	3223	0.4616	nonDE
105040778	XM_010917463	LOC105040778	reticulon-like protein B2	protein_coding	XP_010915765.1	.	290	246	186	464	201961041715053	177119947572496	135425585824873	288747413719286	-0.4994	0.6828	4276	0.3511	nonDE
105040786	XM_019849476	LOC105040786	serine/threonine-protein phosphatase PP1	protein_coding	XP_019705035.1	.	200	161	235	92	139283477044864	11591996568769	171102218649705	572516423753756	-0.0101	0.007544	3492	0.9917	nonDE
105040791	XM_010917484,XR_003800227	LOC105040791	uncharacterized LOC105040791, transcript variant X2	protein_coding	XP_010915786.1	.	277	270	198	227	192907615707137	194399942457617	14416272039422	141262204556633	0.02652	0.03795	4058	0.9541	nonDE
105040797	XM_010917494	LOC105040797	mitochondrial arginine transporter BAC2	protein_coding	XP_010915796.1	.	160	165	78	107	111426781635891	11879996483521	567913747007531	665861492844043	0.4748	0.7154	3079	0.3364	nonDE
105040808	XM_010917504	LOC105040808	probable chlorophyll(ide) b reductase NYC1, chloroplastic	protein_coding	XP_010915806.1	.	656	689	292	268	456849804707155	496079853160363	212603607854102	166776523441312	0.9301	2.51	4906	0.02929	upReg
105040812	XM_010917508	LOC105040812	subtilisin-like protease SBT6.1	protein_coding	XP_010915810.1	.	102	125	98	96	710345732928808	899999733600079	713532656496642	597408442177833	-0.1183	0.1247	2.86	0.8395	nonDE
105040817	XM_010917513,XM_010917514,XM_010917515,XM_010917517,XM_019848941,XM_029263288,XM_029263289,XM_029263290	LOC105040817	pentatricopeptide repeat-containing protein At5g25630, transcript variant X3	protein_coding	XP_010915815.1		499	434	254	268	347512275226936	312479907505947	18493601505117	166776523441312	0.4969	1244	4591	0.1561	nonDE
105040822	XM_010917525	LOC105040822	uncharacterized LOC105040822	protein_coding	XP_010915827.1	.	114	199	179	205	793915819155726	143279957589133	130328923992754	127571594423391	-0.6953	1.14	3556	0.1816	nonDE
105040823	XM_010917526,XM_019849239	LOC105040823	protein LIKE COV 1, transcript variant X1	protein_coding	XP_010915828.1		87	90	105	229	605883125145159	647999808192057	764499274817831	142506805477837	-1171	1589	3022	0.09665	nonDE
105040832	XM_010917535,XM_010917536,XM_010917537,XM_010917538,XM_010917539	LOC105040832	TOM1-like protein 9, transcript variant X2	protein_coding	XP_010915837.1		215	244	195	226	149729737823229	175679947998735	141978436751883	140639904096031	-0.2163	0.3694	3923	0.5738	nonDE
105040836	XM_010917545,XM_010917547,XM_010917548,XM_010917549,XM_019849298	LOC105040836	protein PEROXIN-4, transcript variant X3	protein_coding	XP_010915847.1		239	142	94	73	166443755068613	102239969736969	68440887459882	454279336239393	0.8376	1118	3099	0.1871	nonDE
105040837	XM_010917550	LOC105040837	peroxisomal fatty acid beta-oxidation multifunctional protein	protein_coding	XP_010915852.1	.	43	93	232	155	299459475646458	669599801798459	168917935007368	964565713932959	-1.94	2169	2926	0.04567	downReg
105040845	XM_010917561,XM_019848895	LOC105040845	putative E3 ubiquitin-protein ligase LIN-1, transcript variant X2	protein_coding	XP_010915863.1		269	193	211	122	187336276625342	138959958867852	153627949511012	759206561934329	0.1899	0.2142	3726	0.7317	nonDE
105040848	XM_010917571	LOC105040848	chaperone protein ClpB1	protein_coding	XP_010915873.1	.	1014	1002	20	34	706167228617462	721439786453823	145618909489111	211582156604649	4871	2349	3499	0.03612	upReg
105040855	XM_010917580	LOC105040855	eukaryotic translation initiation factor 2 subunit alpha homolog	protein_coding	XP_010915882.1	.	642	761	190	381	447099961314014	547919837815728	138337964014655	237096475489327	1019	2106	4906	0.04936	upReg
105040856	XM_010917591,XM_029264360,XR_003800764	LOC105040856	vesicle-fusing ATPase, transcript variant X1	protein_coding	XP_010915893.1		116	129	142	125	807844166860213	928799725075281	103389425737269	777875575752386	-0.4538	0.7101	3145	0.339	nonDE
105040857	XM_010917581	LOC105040857	auxin-responsive protein IAA17	protein_coding	XP_010915883.1	.	2196	1570	1331	1542	152933257795261	11303996654017	969093842650031	959587310248144	0.0326	0.05083	6816	0.9341	nonDE
105040862	XM_010917586,XM_010917587,XR_003800249,XR_003800250,XR_003800251,XR_003800252	LOC105040862	casein kinase 1-like protein 4, transcript variant X1	protein_coding	XP_010915888.1		499	480	415	624	347512275226936	34559989770243	302159237189905	388315487415591	-0.4007	0.9578	5108	0.2395	nonDE
105040863	XM_010917588	LOC105040863	probable lactoylglutathione lyase, chloroplastic	protein_coding	XP_010915890.1	.	488	239	257	260	339851683989469	172079949064335	187120298693507	161798119756496	0.07215	0.0784	4361	0.8991	nonDE
105040866	XM_010917601,XM_010917603,XM_010917604,XM_010917605,XM_019849264,XM_019849265,XR_831280,XR_831282	LOC105040866	protein phosphatase 2C and cyclic nucleotide-binding/kinase domain-containing protein, transcript variant X8	protein_coding	XP_010915903.1		262	251	157	193	182461354928772	180719946506896	114310843948952	120103988896168	0.2158	0.3746	3.87	0.5701	nonDE
105040867	XM_010917606	LOC105040867	probable aquaporin TIP2-2	protein_coding	XP_010915908.1	.	153	116	0	27	106551859939321	835199752780873	0	168021124362515	4838	0.7573	0.6205	0.3174	nonDE
105040871	XM_010917609	LOC105040871	tRNAse Z TRZ4, mitochondrial	protein_coding	XP_010915911.1	.	439	466	242	305	305727232113477	335519900686109	176198880481824	189801640483582	0.3908	0.9125	4599	0.2559	nonDE
105040873	XM_010917613	LOC105040873	ABC transporter E family member 2	protein_coding	XP_010915915.1	.	358	268	392	282	249317423910307	192959942883857	285413062598657	175488729889738	-0.4271	0.7636	4472	0.3153	nonDE
105040877	XM_010917617,XM_029263308,XM_029263309,XM_029263310,XR_003800254	LOC105040877	60S ribosomal protein L27-3, transcript variant X4	protein_coding	XP_010915919.1		696	582	209	438	484706500116128	419039875964197	152171760416121	272567601743636	0.7145	1401	4923	0.1254	nonDE
105040879	XM_010917618	LOC105040879	glycosyltransferase-like At2g41451	protein_coding	XP_010915920.1	.	151	148	144	129	105159025168872	106559968458249	10484561483216	802767594176463	-0.1968	0.2764	3306	0.6655	nonDE
105040890	XM_019849283	LOC105040890	protein TSS	protein_coding	XP_019704842.1	.	2832	2931	1407	1326	197225403495528	211031937534547	102442902825589	825170410758131	0.7347	1925	7098	0.06112	nonDE
105040897	XM_010917644	LOC105040897	phosphatidylinositol 4-kinase gamma 4	protein_coding	XP_010915946.1	.	95	135	138	171	661596515963105	971999712288085	100477047547486	106413378762926	-0.7902	1367	3192	0.1308	nonDE
105040902	XM_010917653,XM_029263317	LOC105040902	CLP protease regulatory subunit CLPX1, mitochondrial, transcript variant X1	protein_coding	XP_010915955.1		208	198	96	127	144854816126659	142559957802253	698970765547731	790321584964424	0.527	0.9393	3374	0.2454	nonDE
105040909	XM_010917664	LOC105040909	protein SPA1-RELATED 4	protein_coding	XP_010915966.2	.	364	413	307	215	253495928221653	297359911981466	223525026065785	13379459902941	0.2656	0.4249	4448	0.5247	nonDE
105040914	XM_010917663,XR_003800257,XR_831291,XR_831292,XR_831293	LOC105040914	exportin-2, transcript variant X3	protein_coding	XP_010915965.1	.	139	112	103	85	968020165461806	806399761305671	74993738386892	528955391511623	0.09664	0.09954	2906	0.871	nonDE
105040932	XM_010917691	LOC105040932	RNA-binding KH domain-containing protein RCF3	protein_coding	XP_010915993.1	.	132	118	38	82	919270948496104	849599748518474	27667592802931	510286377693565	0.6984	0.6642	2536	0.3616	nonDE
105040936	XM_010917697	LOC105040936	elongation factor G, mitochondrial	protein_coding	XP_010915999.1	.	508	520	228	248	353780031693955	374399889177633	166005556817586	154330514229273	0.7714	2073	4595	0.05165	nonDE
105040942	XM_010917707	LOC105040942	probable LIM domain-containing serine/threonine-protein kinase DDB_G0286997	protein_coding	XP_010916009.1	.	118	129	149	155	821772514564699	928799725075281	108486087569387	964565713932959	-0.6387	1188	3246	0.1689	nonDE
105040952	XM_010917719	LOC105040952	triose phosphate/phosphate translocator, chloroplastic	protein_coding	XP_010916021.1	.	566	445	427	394	394172240036966	320399905161628	310896371759251	245186381477152	-0.04323	0.06866	4971	0.9105	nonDE
105040953	XM_010917720	LOC105040953	guanylate-binding protein 4	protein_coding	XP_010916022.1	.	95	166	203	278	661596515963105	11951996462209	147803193131447	172999528047331	-1273	2252	3.58	0.04124	downReg
105040970	XM_010917738	LOC105040970	acyl-coenzyme A oxidase 3, peroxisomal	protein_coding	XP_010916040.1	.	117	83	92	169	814808340712456	597599823110452	669846983649909	105168777841723	-0.6939	0.9511	2943	0.2413	nonDE
105040979	XM_010917750,XM_010917751	LOC105040979	homogentisate 1,2-dioxygenase, transcript variant X2	protein_coding	XP_010916052.1		179	76	54	117	124658711955153	547199838028848	393171055620599	728091538904233	0.1872	0.1349	2741	0.8251	nonDE
105040982	XM_010917757	LOC105040982	proton pump-interactor BIP131	protein_coding	XP_010916059.1	.	199	205	126	157	13858705965964	147599956310413	917399129781397	977011723144997	0.1764	0.2659	3545	0.6771	nonDE
105040987	XM_010917759	LOC105040987	60S ribosomal protein L18a-like protein	protein_coding	XP_010916061.1	.	179	128	150	271	124658711955153	921599727206481	109214182116833	168643424823117	-0.7578	1.3	3597	0.1435	nonDE
105040989	XM_010917761,XM_010917762,XM_029263344,XM_029263345	LOC105040989	P-loop guanosine triphosphatase YjiA, transcript variant X4	protein_coding	XP_010916063.1		223	197	88	159	155301076905024	141839958015372	640723201752087	989457732357035	0.4592	0.7154	3447	0.3364	nonDE
105040996	XM_010917772	LOC105040996	mitogen-activated protein kinase 10	protein_coding	XP_010916074.1	.	125	120	152	50	870521731530402	863999744256076	110670371211724	311150230300954	0.2257	0.1693	2842	0.7835	nonDE
105040999	XM_019848828	LOC105040999	protein REDUCED WALL ACETYLATION 3	protein_coding	XP_019704387.1	.	125	96	192	76	870521731530402	691199795404861	139794153109546	472948350057451	-0.4218	0.3735	2996	0.5711	nonDE
105041001	XM_019849594	LOC105041001	protein MEI2-like 2	protein_coding	XP_019705153.2	.	207	207	252	217	144158398741434	149039955884173	183479825956279	135039199950614	-0.5084	1026	3928	0.216	nonDE
105041010	XM_019848893	LOC105041010	glutathionyl-hydroquinone reductase YqjG	protein_coding	XP_019704452.1	.	238	191	78	56	165747337683388	137519959294092	567913747007531	348488257937069	1391	2026	3042	0.05474	nonDE
105041011	XM_010917793,XM_010917794	LOC105041011	peptide methionine sulfoxide reductase B1, chloroplastic, transcript variant X1	protein_coding	XP_010916095.1		763	529	104	254	531366464926157	380879887259553	757218329343375	158064316992885	1.6	2753	4475	0.02178	upReg
105041013	XM_010917795	LOC105041013	chlorophyll a-b binding protein of LHCII type 1	protein_coding	XP_010916097.1	.	18895	13548	20531	21644	131588064938135	975455711265109	149485091536047	134690711692677	-0.7387	1318	10.31	0.1407	nonDE
105041016	XM_010917798,XM_010917799,XM_010917800,XM_029263350	LOC105041016	aspartic proteinase oryzasin-1, transcript variant X3	protein_coding	XP_010916100.1		531	716	453	654	369797631554115	515519847406125	329826829992836	406984501233648	-0.1646	0.2815	5323	0.661	nonDE
105041017	XM_010917801	LOC105041017	probable WRKY transcription factor 31	protein_coding	XP_010916103.2	.	236	370	568	619	16435450291294	266399921145623	413557702949074	385203985112582	-1349	3073	4855	0.01509	downReg
105041027	XM_010917817,XM_010917818,XM_029263356	LOC105041027	probable phosphoinositide phosphatase SAC9, transcript variant X1	protein_coding	XP_010916119.1		400	392	300	301	278566954089728	282239916456985	218428364233666	187312438641175	0.06136	0.102	4576	0.8675	nonDE
105041043	XM_010917835	LOC105041043	coiled-coil domain-containing protein 130	protein_coding	XP_010916137.1	.	470	328	244	368	327316171055431	236159930096661	177655069576715	229006569501502	0.04398	0.05943	4568	0.9221	nonDE
105041044	XM_010917837,XM_010917838,XM_029263361	LOC105041044	DNA mismatch repair protein MSH2, transcript variant X1	protein_coding	XP_010916139.1		223	208	158	244	155301076905024	149759955671053	115038938496397	151841312386866	-0.2132	0.3347	3831	0.6071	nonDE
105041066	XM_010917857,XR_002164214,XR_002164216,XR_003800290,XR_003800291,XR_003800292,XR_003800293,XR_831324,XR_831325,XR_831328,XR_831329,XR_831330	LOC105041066	serine/threonine-protein kinase prpf4B, transcript variant X12	protein_coding	XP_010916159.1	.	437	375	424	276	304334397343028	269999920080024	308712088116915	171754927126127	-0.0825	0.1068	4685	0.8615	nonDE
105041071	XM_010917864	LOC105041071	14-3-3-like protein	protein_coding	XP_010916166.1	.	95	152	151	91	661596515963105	10943996760577	109942276664279	566293419147737	-0.2814	0.2787	3041	0.6647	nonDE
105041072	XM_010917865	LOC105041072	protein CASP	protein_coding	XP_010916167.1	.	250	312	299	315	17410434630608	22463993350658	21770026968622	196024645089601	-0.4766	1043	4.34	0.2107	nonDE
105041073	XM_010917866,XM_029263368,XM_029263369,XM_029263370	LOC105041073	ubiquitin receptor RAD23c, transcript variant X4	protein_coding	XP_010916168.1		223	139	128	208	155301076905024	100079970376329	931961020730308	129438495805197	-0.2363	0.3048	3553	0.6379	nonDE
105041075	XM_010917868	LOC105041075	zinc finger protein CONSTANS-LIKE 16	protein_coding	XP_010916170.1	.	192	171	87	231	13371213796307	123119963556491	633442256277631	143751406399041	-0.02135	0.01848	3473	0.9782	nonDE
105041076	XM_010917869,XM_029263371	LOC105041076	phosphatidylinositol 4-kinase alpha 1, transcript variant X1	protein_coding	XP_010916171.1		418	572	486	453	291102467023766	411839878095396	353853950058539	281902108652665	-0.2791	0.5315	5049	0.4423	nonDE
105041078	XM_010917873,XM_019848876,XM_019848877	LOC105041078	U-box domain-containing protein 11, transcript variant X1	protein_coding	XP_010916175.1		105	127	90	111	731238254485537	91439972933768	655285092700998	690753511268119	-0.1428	0.1587	2898	0.7968	nonDE
105041082	XM_010917878,XM_029263372,XR_003800302,XR_003800303	LOC105041082	probable serine/threonine protein kinase IREH1, transcript variant X4	protein_coding	XP_010916180.1		513	584	731	1007	357262118620077	420479875537957	532237114182699	626656563826122	-0.9889	2822	5565	0.02005	downReg
105041098	XM_010917900	LOC105041098	ubiquitin-conjugating enzyme E2 variant 1D	protein_coding	XP_010916202.1	.	196	163	142	230	136497807503967	11735996526145	103389425737269	143129105938439	-0.3631	0.5961	3637	0.3971	nonDE
105041105	XM_010917911	LOC105041105	protein VAC14 homolog	protein_coding	XP_010916213.1	.	126	106	156	117	877485905382645	763199774092867	113582749401506	728091538904233	-0.5426	0.8141	3115	0.293	nonDE
105041107	XM_010917918	LOC105041107	nuclear pore complex protein NUP155	protein_coding	XP_010916220.1	.	332	351	386	372	231210571894475	252719925194902	281044495313984	23149577134391	-0.4877	1209	4636	0.1636	nonDE
105041109	XM_010917919	LOC105041109	centromere protein V	protein_coding	XP_010916221.2	.	179	80	55	142	124658711955153	575999829504051	400452001095054	883666654054711	0.05941	0.03967	2836	0.9518	nonDE
105041111	XM_010917926,XM_010917935,XM_010917944,XM_019854527,XM_029264301,XM_029264304,XM_029264306	LOC105041111	alpha,alpha-trehalose-phosphate synthase [UDP-forming] 1, transcript variant X4	protein_coding	XP_010916228.1		182	272	268	255	126747964110826	195839942031377	195129338715408	158686617453487	-0.5709	1057	4061	0.2061	nonDE
105041113	XM_010917924,XM_029263378	LOC105041113	adagio-like protein 3, transcript variant X2	protein_coding	XP_010916226.1		605	457	141	141	421332518060714	329039902604189	102661331189823	877443649448692	1562	3482	4236	0.009583	upReg
105041117	XM_010917933	LOC105041117	NADH dehydrogenase [ubiquinone] iron-sulfur protein 1, mitochondrial	protein_coding	XP_010916235.1	.	390	322	212	214	271602780237485	23183993137538	154356044058457	133172298568809	0.3977	0.8521	4248	0.279	nonDE
105041118	XM_010917934	LOC105041118	translocase of chloroplast 34, chloroplastic	protein_coding	XP_010916236.1	.	136	140	44	66	947127643905077	100799970163209	320361600876043	41071830399726	0.958	0.9801	2583	0.2312	nonDE
105041119	XM_029263384,XM_029263385,XM_029263386,XM_029263388,XM_029263389,XM_029263390,XM_029263391	LOC105041119	heat stress transcription factor A-1, transcript variant X5	protein_coding	XP_029119217.1		225	124	89	249	156693911675472	892799735731278	648004147226542	154952814689875	-0.2023	0.1745	3449	0.7783	nonDE
105041120	XM_010917938	LOC105041120	mitogen-activated protein kinase kinase 9	protein_coding	XP_010916240.1	.	113	116	130	206	786951645303483	835199752780873	946522911679219	128193894883993	-0.8653	1555	3246	0.1	nonDE
105041126	XM_010917950	LOC105041126	vacuolar sorting protein 39	protein_coding	XP_010916252.1	.	143	93	124	135	995876860870779	669599801798459	902837238832486	840105621812577	-0.4938	0.7448	3082	0.3229	nonDE
105041127	XM_010917953	LOC105041127	nuclear poly(A) polymerase 1	protein_coding	XP_010916255.1	.	248	292	195	190	172711511535632	210239937768978	141978436751883	118237087514363	0.1436	0.22	3977	0.7262	nonDE
105041129	XM_010917955	LOC105041129	fructose-bisphosphate aldolase 1, chloroplastic	protein_coding	XP_010916257.1	.	277	265	168	203	192907615707137	190799943523217	122319883970853	126326993502188	0.2106	0.3724	3952	0.5718	nonDE
105041131	XM_010917956	LOC105041131	T-complex protein 1 subunit delta	protein_coding	XP_010916258.1	.	133	125	87	58	926235122348347	899999733600079	633442256277631	360934267149107	0.5579	0.6677	2732	0.3601	nonDE
105041146	XM_010917986	LOC105041146	leucine--tRNA ligase, chloroplastic/mitochondrial	protein_coding	XP_010916288.1	.	1137	858	502	409	791826567000053	617759817143094	365503462817668	254520888386181	0.7897	1979	5531	0.0576	nonDE
105041149	XM_010917990	LOC105041149	ATP synthase subunit beta, mitochondrial	protein_coding	XP_010916292.1	.	277	329	114	65	192907615707137	236879929883541	830027784087931	404495299391241	1506	2369	3482	0.03538	upReg
105041156	XM_010918001,XM_010918002,XM_010918003,XM_010918004,XM_029263397	LOC105041156	peptidyl-prolyl cis-trans isomerase FKBP42, transcript variant X3	protein_coding	XP_010916303.1		123	119	49	70	856593383825915	856799746387275	356766328248321	435610322421336	0.6625	0.7114	2548	0.3382	nonDE
105041159	XM_010918017	LOC105041159	integrin-linked protein kinase 1	protein_coding	XP_010916319.1	.	146	163	168	109	101676938242751	11735996526145	122319883970853	678307502056081	-0.129	0.1424	3323	0.8167	nonDE
105041166	XM_010918018,XM_010918019,XM_010918020,XM_029263398	LOC105041166	oligoribonuclease, transcript variant X2	protein_coding	XP_010916320.1		185	149	257	206	128837216266499	107279968245129	187120298693507	128193894883993	-0.7983	1601	3758	0.09519	nonDE
105041173	XM_010918027	LOC105041173	guanine nucleotide-binding protein subunit beta-like protein A	protein_coding	XP_010916329.1	.	49	105	27	144	341244518759917	755999776224066	196585527810299	896112663266749	-0.357	0.1878	2.22	0.7619	nonDE
105041174	XM_010918028,XM_010918030	LOC105041174	rDNA transcriptional regulator pol5, transcript variant X1	protein_coding	XP_010916330.1		323	427	263	421	224942815427456	307439908997787	19148886597818	261988493913404	-0.1929	0.3002	4603	0.6422	nonDE
105041175	XM_010918032	LOC105041175	ABC transporter G family member 7	protein_coding	XP_010916334.1	.	801	719	437	405	557830325564681	517679846766765	318177317233707	252031686543773	0.515	1402	5287	0.1254	nonDE
105041200	XM_010918063	LOC105041200	alpha-xylosidase 1	protein_coding	XP_010916365.1	.	34	157	228	115	236781910976269	11303996654017	166005556817586	715645529692195	-1497	1.21	2917	0.1633	nonDE
105041203	XM_010918066	LOC105041203	ribulose bisphosphate carboxylase small chain, chloroplastic	protein_coding	XP_010916368.1	.	1176	742	284	604	818986845023802	534239841865007	206778851474537	375869478203553	0.8199	1462	5426	0.1148	nonDE
105041209	XM_010918071	LOC105041209	KH domain-containing protein HEN4	protein_coding	XP_010916373.1	.	514	415	306	331	357958536005301	298799911555226	222796931518339	205981452459232	0.1996	0.4027	4728	0.5443	nonDE
105041217	XM_010918082,XM_010918083	LOC105041217	synaptotagmin-5, transcript variant X1	protein_coding	XP_010916384.1		665	885	389	568	463117561174174	637199811388856	28322877895632	353466661621884	0.3609	0.7427	5375	0.3237	nonDE
105041219	XM_010918086,XM_029263407	LOC105041219	uncharacterized LOC105041219, transcript variant X1	protein_coding	XP_010916388.1		260	247	134	146	181068520158324	177839947359376	975646693577041	908558672478787	0.5173	1059	3704	0.2054	nonDE
105041220	XM_010918088,XM_029263408	LOC105041220	uncharacterized LOC105041220, transcript variant X2	protein_coding	XP_010916390.1		114	115	60	25	793915819155726	827999754912073	436856728467332	155575115150477	1319	0.76	2214	0.3166	nonDE
105041276	XM_010918171	LOC105041276	60S ribosomal protein L26-2	protein_coding	XP_010916473.1	.	341	302	106	332	237478328361494	217439935637779	771780220292286	206603752919834	0.4099	0.4623	4086	0.4946	nonDE
105041280	XM_010918178	LOC105041280	citrate synthase, glyoxysomal	protein_coding	XP_010916480.1	.	159	143	238	147	110730364250667	102959969523849	173286502292042	914781677084806	-0.6343	0.979	3.54	0.2316	nonDE
105041281	XM_010918177	LOC105041281	AP2/ERF and B3 domain-containing transcription repressor RAV2	protein_coding	XP_010916479.1	.	42	40	221	392	292495301794215	287999914752025	160908894985467	243941780555948	-3182	2037	2933	0.05406	nonDE
105041283	XM_010918179	LOC105041283	protein SUPPRESSOR OF K(+) TRANSPORT GROWTH DEFECT 1	protein_coding	XP_010916481.1	.	483	454	395	371	336369597063347	326879903243549	287597346240993	230873470883308	-0.0452	0.07525	4871	0.9023	nonDE
105041285	XM_010918180,XM_010918181,XM_010918182,XM_010918183,XM_010918184,XM_010918185,XM_019848820,XM_029263440,XM_029263441,XM_029263443,XM_029263444,XM_029263445,XM_029263446,XM_029263448	LOC105041285	senescence-associated protein OSA15, chloroplastic, transcript variant X6	protein_coding	XP_010916482.1		1233	907	725	993	858682635981588	653039806700217	527868546898026	617944357377696	-0.02339	0.03712	6032	0.9553	nonDE
105041287	XM_010918191	LOC105041287	50S ribosomal protein L13, chloroplastic	protein_coding	XP_010916493.1	.	240	287	73	111	167140172453837	206639938834578	531509019635254	690753511268119	1178	2077	3413	0.05139	nonDE
105041288	XM_010918187,XM_010918188,XM_029263449,XM_029263450,XM_029263452	LOC105041288	RHOMBOID-like protein 9, chloroplastic, transcript variant X5	protein_coding	XP_010916489.1		236	239	311	262	16435450291294	172079949064335	226437404255567	1630427206777	-0.5959	1293	4171	0.1451	nonDE
105041289	XM_010918192	LOC105041289	GTPase activating protein 1	protein_coding	XP_010916494.1	.	146	167	142	258	101676938242751	120239964408971	103389425737269	160553518835293	-0.6456	1099	3581	0.1921	nonDE
105041290	XM_010918193,XM_010918194,XM_010918195,XM_010918196,XM_010918197,XM_010918198,XM_029263453,XM_029263454	LOC105041290	protein PTST, chloroplastic, transcript variant X1	protein_coding	XP_010916495.1		190	96	179	169	132319303192621	691199795404861	130328923992754	105168777841723	-0.6857	1.05	3408	0.2085	nonDE
105041296	XM_029263456,XR_003800312	LOC105041296	DEAD-box ATP-dependent RNA helicase 21-like, transcript variant X1	protein_coding	XP_029119289.1	.	355	348	98	177	247228171754634	250559925834262	713532656496642	110147181526538	1051	2154	3897	0.04631	upReg
105041297	XM_010918202	LOC105041297	ribosome biogenesis protein BOP1 homolog	protein_coding	XP_010916504.1	.	283	250	160	190	197086120018483	179999946720016	116495127591289	118237087514363	0.268	0.4923	3898	0.4705	nonDE
105041302	XM_010918209,XR_003800313	LOC105041302	phytanoyl-CoA dioxygenase, transcript variant X2	protein_coding	XP_010916511.1	.	253	241	67	117	176193598461753	173519948638095	487823346788521	728091538904233	1107	1942	3357	0.05968	nonDE
105041306	XM_010918214,XM_019849506,XR_831371	LOC105041306	outer envelope protein 64, chloroplastic, transcript variant X3	protein_coding	XP_010916516.1		304	257	102	160	211710885108194	185039945228176	742656438394464	995680736963054	0.7728	1548	3.71	0.1008	nonDE
105041307	XM_010918216	LOC105041307	DELLA protein SLR1	protein_coding	XP_010916518.1	.	80	127	170	66	557133908179457	91439972933768	123776073065744	41071830399726	-0.3628	0.2837	2842	0.6592	nonDE
105041309	XM_010918223,XM_010918231,XM_019851536,XM_019851538,XM_019851541,XM_029264245	LOC105041309	probable LRR receptor-like serine/threonine-protein kinase At1g53440, transcript variant X3	protein_coding	XP_010916525.1		441	427	454	434	307120066883926	307439908997787	330554924540281	270078399901228	-0.369	0.9107	4923	0.2562	nonDE
105041314	XM_010918235	LOC105041314	importin-4	protein_coding	XP_010916537.1	.	150	150	159	200	104462607783648	107999968032009	115767033043843	124460092120382	-0.5919	1199	3502	0.1658	nonDE
105041316	XM_010918238,XM_010918239,XM_010918241,XM_029263463,XM_029263464,XM_029263465	LOC105041316	oxysterol-binding protein-related protein 1C, transcript variant X6	protein_coding	XP_010916540.1		91	106	194	109	633739820554132	763199774092867	141250342204437	678307502056081	-0.8812	1139	3051	0.1818	nonDE
105041319	XM_010918243	LOC105041319	30S ribosomal protein S13, chloroplastic	protein_coding	XP_010916545.1	.	239	158	102	100	166443755068613	11375996632705	742656438394464	622300460601909	0.6134	0.951	3279	0.2413	nonDE
105041322	XM_010918248	LOC105041322	transmembrane protein 87B	protein_coding	XP_010916550.1	.	96	133	137	82	668560689815348	957599716550484	997489530000408	510286377693565	-0.2197	0.2118	2924	0.7341	nonDE
105041325	XM_010918251	LOC105041325	mitogen-activated protein kinase kinase kinase 1	protein_coding	XP_010916553.1	.	78	102	144	208	543205560474971	734399782617664	10484561483216	129438495805197	-1307	2227	3107	0.04243	downReg
105041330	XM_010918257	LOC105041330	beta-1,3-galactosyltransferase 7	protein_coding	XP_010916559.1	.	122	149	314	164	849629209973672	107279968245129	228621687897904	102057275538713	-1074	1531	3598	0.1031	nonDE
105041332	XM_010918263	LOC105041332	probable LRR receptor-like serine/threonine-protein kinase At1g53440	protein_coding	XP_010916565.2	.	438	383	230	272	305030814728253	275759918375064	167461745912477	169265725283719	0.3704	0.8461	4468	0.281	nonDE
105041333	XM_010918259	LOC105041333	pinin	protein_coding	XP_010916561.1	.	1139	1210	563	934	793219401770502	871199742124876	409917230211846	581228630202183	0.3528	0.759	5994	0.3167	nonDE
105041339	XM_010918272,XM_029263477	LOC105041339	eukaryotic translation initiation factor 5B, transcript variant X1	protein_coding	XP_010916574.1		101	129	108	87	703381559076564	928799725075281	786342111241197	541401400723661	-0.09093	0.08872	2867	0.8856	nonDE
105041355	NM_001303597	LOC105041355	probable BOI-related E3 ubiquitin-protein ligase 2	protein_coding	NP_001290526.1	.	243	294	224	317	16922942460951	211679937342739	163093178627804	197269246010805	-0.3445	0.6476	4206	0.37	nonDE
105041356	XM_010918298	LOC105041356	uncharacterized TPR repeat-containing protein At1g05150	protein_coding	XP_010916600.1	.	120	180	189	444	835700862269185	129599961638411	13760986946721	276301404507248	-1346	1982	3836	0.05741	nonDE
105041360	XM_010918302,XM_010918303,XM_010918304	LOC105041360	CLK4-associating serine/arginine rich protein, transcript variant X2	protein_coding	XP_010916604.1		399	419	500	573	277870536704504	301679910702746	364047273722777	356578163924894	-0.7286	2142	5015	0.04675	downReg
105041366	XM_010918313,XM_010918314,XM_010918315,XM_010918316	LOC105041366	uncharacterized LOC105041366, transcript variant X4	protein_coding	XP_010916615.1		593	475	462	622	412975509438022	34199989876803	336379680919846	387070886494387	-0.3553	0.8633	5204	0.2747	nonDE
105041369	XM_010918317,XR_003800323,XR_003800324,XR_831383	LOC105041369	protein WEAK CHLOROPLAST MOVEMENT UNDER BLUE LIGHT 1, transcript variant X3	protein_coding	XP_010916619.1	.	117	142	85	155	814808340712456	102239969736969	61888036532872	964565713932959	-0.2039	0.23	3076	0.7173	nonDE
105041372	XM_010918326,XM_010918327,XM_010918329	LOC105041372	phosphatidate phosphatase PAH2, transcript variant X1	protein_coding	XP_010916628.1		152	211	141	79	105855442554097	151919955031693	102661331189823	491617363875508	0.4568	0.5369	3252	0.4382	nonDE
105041373	XM_010918334,XM_010918345,XR_831384	LOC105041373	uncharacterized LOC105041373, transcript variant X2	protein_coding	XP_010916636.1		119	145	26	41	828736688416942	104399969097609	189304582335844	255143188846783	1615	0.7796	2191	0.3081	nonDE
105041374	XM_010918331	LOC105041374	DEAD-box ATP-dependent RNA helicase 53, mitochondrial	protein_coding	XP_010916633.1	.	2738	2431	918	702	190679080074419	175031948190543	668390794555018	43685492334254	1346	3152	6635	0.01395	upReg
105041376	XM_010918333,XM_010918335,XM_010918336,XM_010918337	LOC105041376	uncharacterized LOC105041376, transcript variant X4	protein_coding	XP_010916635.1		165	116	138	239	114908868562013	835199752780873	100477047547486	148729810083856	-0.7364	1245	3457	0.1557	nonDE
105041379	XM_010918340,XM_010918341	LOC105041379	uncharacterized LOC105041379, transcript variant X1	protein_coding	XP_010916642.1		419	345	281	384	291798884408991	248399926473622	2045945678322	238963376871133	-0.1324	0.2337	4611	0.7134	nonDE
105041389	XM_010918357	LOC105041389	probable alpha,alpha-trehalose-phosphate synthase [UDP-forming] 7	protein_coding	XP_010916659.1	.	740	879	476	857	515348865065998	632879812667575	346573004584083	533311494735836	-0.007825	0.01014	5632	0.989	nonDE
105041392	XM_010918358	LOC105041392	CDPK-related kinase 5	protein_coding	XP_010916660.1	.	190	219	453	244	132319303192621	157679953326734	329826829992836	151841312386866	-1026	1622	4171	0.09242	nonDE
105041394	XM_010918360,XM_010918362	LOC105041394	serine--tRNA ligase, chloroplastic/mitochondrial, transcript variant X2	protein_coding	XP_010916662.1		184	172	98	76	128140798881275	123839963343371	713532656496642	472948350057451	0.7242	1143	3103	0.1812	nonDE
105041395	XM_010918363	LOC105041395	AP-4 complex subunit mu	protein_coding	XP_010916665.1	.	234	206	177	143	162961668142491	148319956097293	128872734897863	88988965866073	0.136	0.1878	3694	0.7619	nonDE
105041399	XM_010918365,XM_010918366	LOC105041399	ubiquitin carboxyl-terminal hydrolase 17, transcript variant X2	protein_coding	XP_010916667.1		124	150	193	181	863557557678158	107999968032009	140522247656992	112636383368946	-0.7926	1562	3467	0.09901	nonDE
105041402	XM_010918372,XM_019849528,XM_029263488	LOC105041402	uncharacterized LOC105041402, transcript variant X1	protein_coding	XP_010916674.1		267	284	177	120	185943441854894	204479939473938	128872734897863	746760552722291	0.5948	1044	3794	0.2099	nonDE
105041411	XM_010918381	LOC105041411	dentin sialophosphoprotein	protein_coding	XP_010916683.1	.	101	108	87	240	703381559076564	777599769830468	633442256277631	149352110544458	-0.8446	0.9758	3091	0.2326	nonDE
105041414	XM_010918384,XM_010918387,XM_029263492,XR_003800334,XR_831399	LOC105041414	WD and tetratricopeptide repeats protein 1, transcript variant X5	protein_coding	XP_010916686.1		199	118	64	123	13858705965964	849599748518474	465980510365154	765429566540348	0.4196	0.461	3016	0.4953	nonDE
105041418	XM_010918392	LOC105041418	GEM-like protein 1	protein_coding	XP_010916694.1	.	285	140	162	252	198478954788932	100799970163209	11795131668618	156819716071681	-0.3569	0.4545	3798	0.5006	nonDE
105041488	XM_010918456,XM_029264189	LOC105041488	ras-related protein Rab7, transcript variant X1	protein_coding	XP_010916758.1		126	175	141	153	877485905382645	125999962704011	102661331189823	952119704720921	-0.3282	0.4888	3355	0.4735	nonDE
105041573	XM_010918516	LOC105041573	phosphomannomutase/phosphoglucomutase	protein_coding	XP_010916818.1	.	336	362	206	343	233996241435372	260639922850583	149987476773784	213449057986455	0.03905	0.05225	4396	0.9315	nonDE
105041586	XM_010918907,XM_010919600,XM_019853233,XM_029262976	LOC105041586	probable E3 ubiquitin-protein ligase RZFP34, transcript variant X2	protein_coding	XP_010917209.1		193	123	130	201	134408555348294	885599737862478	946522911679219	125082392580984	-0.4121	0.6164	3.45	0.3853	nonDE
105041594	XM_010918535	LOC105041594	protein SGT1 homolog	protein_coding	XP_010916837.1	.	98	172	97	211	682489037519835	123839963343371	706251711022187	131305397187003	-0.5177	0.584	3.24	0.406	nonDE
105041598	XM_010918537,XM_010918539,XM_010918540,XM_010918541,XM_010918542,XM_029263498,XM_029263499	LOC105041598	uncharacterized LOC105041598, transcript variant X2	protein_coding	XP_010916839.1		50	66	246	438	348208692612161	475199859340842	179111258671606	272567601743636	-2881	3132	3252	0.01426	downReg
105041613	XM_010918574,XM_019849291,XM_019849293,XM_029263510,XR_003800339	LOC105041613	calmodulin-binding transcription activator 3, transcript variant X5	protein_coding	XP_010916876.1		690	480	522	798	480527995804782	34559989770243	380065353766579	496595767560323	-0.5057	1139	5396	0.1816	nonDE
105041621	XM_010918581,XM_010918582,XM_010918584,XM_019849633,XM_019849634,XM_029263512	LOC105041621	protein LNK1, transcript variant X6	protein_coding	XP_010916883.1		55	46	104	151	383029561873377	331199901964829	757218329343375	939673695508882	-1651	1568	2465	0.09874	nonDE
105041626	XM_010918590	LOC105041626	RNA helicase aquarius	protein_coding	XP_010916892.1	.	1166	1321	831	818	812022671171559	951119718468563	605046568927255	509041776772361	0.252	0.587	6127	0.4038	nonDE
105041630	XM_010918595,XM_010918597,XM_019849280,XM_019849281,XM_029263513,XM_029263514,XM_029263515,XM_029263516,XM_029263517,XM_029263518	LOC105041630	uncharacterized WD repeat-containing protein C2A9.03, transcript variant X6	protein_coding	XP_010916897.1		155	137	155	160	10794469470977	986399708025686	112854654854061	995680736963054	-0.4467	0.8161	3391	0.2924	nonDE
105041632	XM_010918599	LOC105041632	elongation factor 1-alpha	protein_coding	XP_010916901.1	.	899	869	397	412	626079229316665	625679814798775	289053535335885	256387789767986	0.7893	2391	5369	0.03438	upReg
105041633	XM_010918600	LOC105041633	acyl-coenzyme A oxidase 2, peroxisomal	protein_coding	XP_010916902.1	.	147	111	112	178	102373355627975	79919976343687	815465893139019	11076948198714	-0.4929	0.7653	3218	0.3148	nonDE
105041643	XM_010918611	LOC105041643	inositol-3-phosphate synthase	protein_coding	XP_010916913.1	.	136	183	145	63	947127643905077	131759960999052	105573709379605	392049290179203	0.4336	0.4299	3.09	0.521	nonDE
105041644	XM_010918613,XM_019849316,XM_029263524	LOC105041644	acetyl-CoA carboxylase 1, transcript variant X3	protein_coding	XP_010916915.1		4321	4622	1798	1409	300921952155429	332783901495965	13091139963071	87682134898809	1143	2534	7525	0.02878	upReg
105041648	XM_010918616,XM_029263526,XR_003800341,XR_003800342	LOC105041648	protein CELLULOSE SYNTHASE INTERACTIVE 1, transcript variant X1	protein_coding	XP_010916918.1		202	237	628	466	140676311815313	170639949490575	457243375795807	28999201464049	-1639	3419	4572	0.01028	downReg
105041650	XM_010918620	LOC105041650	apoptotic chromatin condensation inducer in the nucleus	protein_coding	XP_010916922.1	.	312	246	156	259	217282224189988	177119947572496	113582749401506	161175819295894	0.1161	0.1585	4029	0.7968	nonDE
105041653	XM_010918624,XM_010918625,XM_029263527,XR_003800343,XR_003800344	LOC105041653	F-box/kelch-repeat protein At1g22040, transcript variant X5	protein_coding	XP_010916926.2		116	103	107	78	807844166860213	741599780486465	779061165766742	485394359269489	-0.05298	0.04885	2794	0.9372	nonDE
105041655	XM_010918626,XM_019849383	LOC105041655	myosin-11, transcript variant X1	protein_coding	XP_010916928.1		159	140	329	284	110730364250667	100799970163209	239543106109587	176733330810942	-1363	2997	3886	0.01674	downReg
105041660	XM_010918637	LOC105041660	uncharacterized LOC105041660	protein_coding	XP_010916939.1	.	187	166	140	194	130230051036948	11951996462209	101933236642377	12072628935677	-0.2488	0.4008	3561	0.5455	nonDE
105041664	XM_010918640	LOC105041664	meiotically up-regulated gene 185 protein	protein_coding	XP_010916942.1	.	291	181	63	96	202657459100277	130319961425291	458699564890698	597408442177833	1.2	1745	3212	0.07714	nonDE
105041665	XM_010918641	LOC105041665	LRR receptor kinase BAK1	protein_coding	XP_010916943.1	.	347	328	242	286	241656832672839	236159930096661	176198880481824	177977931732146	0.01757	0.02649	4365	0.9699	nonDE
105041678	XM_010918666,XM_010918668,XM_019849161,XM_019849162,XM_029263538,XM_029263539	LOC105041678	E3 ubiquitin-protein ligase RKP, transcript variant X2	protein_coding	XP_010916968.1		456	483	789	969	31756632766229	347759897063071	574466597934541	60300914632325	-1237	3652	5468	0.008211	downReg
105041680	XM_010918672,XM_010918673	LOC105041680	putative MYST-like histone acetyltransferase 1, transcript variant X1	protein_coding	XP_010916974.1		262	307	253	243	182461354928772	221039934572179	184207920503725	151219011926264	-0.144	0.231	4197	0.7163	nonDE
105041681	XM_010918674	LOC105041681	uncharacterized oxidoreductase At4g09670	protein_coding	XP_010916976.1	.	133	123	114	115	926235122348347	885599737862478	830027784087931	715645529692195	-0.1735	0.223	3069	0.7228	nonDE
105041686	XM_010918678	LOC105041686	uncharacterized oxidoreductase At4g09670	protein_coding	XP_010916980.1	.	169	108	80	103	11769453810291	777599769830468	582475637956443	640969474419966	0.2313	0.2559	2941	0.6885	nonDE
105041688	XM_010918681	LOC105041688	developmentally-regulated G-protein 3	protein_coding	XP_010916983.1	.	234	268	96	141	162961668142491	192959942883857	698970765547731	877443649448692	0.747	1417	3563	0.1228	nonDE
105041690	XM_010918686	LOC105041690	golgin candidate 4-like	protein_coding	XP_010916988.1	.	111	106	178	207	773023297598997	763199774092867	129600829445308	128816195344595	-1161	2374	3322	0.03523	downReg
105041691	XM_010918683	LOC105041691	ABC transporter F family member 2	protein_coding	XP_010916985.1	.	333	533	490	450	231906989279699	383759886407074	356766328248321	280035207270859	-0.496	0.9345	4942	0.2468	nonDE
105041694	XM_010918687	LOC105041694	very-long-chain aldehyde decarbonylase GL1-9	protein_coding	XP_010916989.1	.	156	109	45	49	108641112094994	784799767699269	327642546350499	304927225694935	1137	0.8615	2444	0.2751	nonDE
105041705	XM_010918704,XM_029263541	LOC105041705	probable serine/threonine-protein kinase PBL3, transcript variant X2	protein_coding	XP_010917006.1		100	111	118	291	696417385224321	79919976343687	859151565985753	181089434035155	-1174	1569	3276	0.09863	nonDE
105041714	XM_010918714,XM_010918716,XM_019849443,XM_019849444,XM_029263543,XM_029263544	LOC105041714	F-box/kelch-repeat protein At1g74510, transcript variant X1	protein_coding	XP_010917016.1		166	318	277	272	115605285947237	22895993222786	201682189642418	169265725283719	-0.5981	0.9315	4119	0.2478	nonDE
105041727	XM_010918735	LOC105041727	ATP-dependent 6-phosphofructokinase 5, chloroplastic	protein_coding	XP_010917037.1	.	147	107	66	112	102373355627975	770399771961667	480542401314065	696976515874138	0.1819	0.186	2849	0.7641	nonDE
105041728	XM_010918736	LOC105041728	probable methyltransferase PMT2	protein_coding	XP_010917038.1	.	93	96	337	221	647668168258619	691199795404861	245367862489151	137528401793022	-1851	2861	3476	0.01885	downReg
105041733	XM_010918743	LOC105041733	uncharacterized LOC105041733	protein_coding	XP_010917045.1	.	95	90	97	173	661596515963105	647999808192057	706251711022187	10765797968413	-0.8454	1.25	2924	0.1545	nonDE
105041737	XM_010918747,XM_010918748	LOC105041737	malate dehydrogenase, chloroplastic, transcript variant X2	protein_coding	XP_010917049.1		350	229	53	65	243746084828512	164879951195534	385890110146143	404495299391241	1913	2327	3161	0.03702	upReg
105041754	XM_029263550	LOC105041754	KH domain-containing protein At4g18375	protein_coding	XP_029119383.1	.	78	107	51	140	543205560474971	770399771961667	371328219197232	871220644842673	-0.2946	0.2403	2.61	0.7066	nonDE
105041761	XM_019849039,XR_831422	LOC105041761	exosome complex component RRP41-like, transcript variant X1	protein_coding	XP_019704598.1	.	255	201	127	156	177586433232202	144719957162893	924680075255852	970788718538978	0.3428	0.5931	3628	0.3993	nonDE
105041765	XM_010918787	LOC105041765	protein BOBBER 1	protein_coding	XP_010917089.1	.	253	230	80	113	176193598461753	165599950982415	582475637956443	703199520480157	0.9861	1865	3392	0.0669	nonDE
105041772	XM_010918797,XM_010918798,XM_029263554	LOC105041772	pectinesterase 31, transcript variant X1	protein_coding	XP_010917099.1		131	134	60	68	912306774643861	964799714419285	436856728467332	423164313209298	0.7058	0.8983	2675	0.2621	nonDE
105041782	XM_010918813	LOC105041782	protein ABIL1	protein_coding	XP_010917115.1	.	114	108	133	115	793915819155726	777599769830468	968365748102586	715645529692195	-0.4818	0.7304	3022	0.3295	nonDE
105041801	XM_010918824,XM_010918825	LOC105041801	PHD finger protein ALFIN-LIKE 3, transcript variant X1	protein_coding	XP_010917126.1		187	150	112	220	130230051036948	107999968032009	815465893139019	13690610133242	-0.2633	0.3397	3489	0.602	nonDE
105041802	XM_010918826,XM_010918828,XM_019849600,XM_029263555	LOC105041802	ubiquitin carboxyl-terminal hydrolase 26, transcript variant X1	protein_coding	XP_010917128.1		200	226	205	137	139283477044864	162719951834894	149259382226338	852551631024615	0.01679	0.01784	3708	0.9787	nonDE
105041806	XM_010918834,XR_003800356	LOC105041806	phospholipid:diacylglycerol acyltransferase 1, transcript variant X1	protein_coding	XP_010917136.1	.	94	151	121	137	654632342110862	10871996781889	880994402409119	852551631024615	-0.4622	0.6372	3102	0.3746	nonDE
105041807	XM_010918836	LOC105041807	putative lipoxygenase 5	protein_coding	XP_010917138.1	.	206	215	151	324	14346198135621	154799954179214	109942276664279	201625349235018	-0.4274	0.6179	3.9	0.3845	nonDE
105041809	XM_010918838,XM_010918839,XM_010918840	LOC105041809	26S proteasome non-ATPase regulatory subunit 11 homolog, transcript variant X1	protein_coding	XP_010917140.1		642	558	348	367	447099961314014	401759881079075	253376902511053	228384269040901	0.4058	1056	4998	0.2064	nonDE
105041813	XM_010918845,XM_029263559,XM_029263560,XR_003800357,XR_003800358	LOC105041813	eukaryotic peptide chain release factor GTP-binding subunit ERF3A, transcript variant X2	protein_coding	XP_010917147.1		301	246	166	169	209621632952521	177119947572496	120863694875962	105168777841723	0.3641	0.6981	3885	0.3448	nonDE
105041821	XM_010918862,XM_010918863,XM_010918864,XM_010918865,XM_010918866,XM_019849433,XM_019849437,XM_029263567,XM_029263568,XM_029263569	LOC105041821	protein FAR1-RELATED SEQUENCE 6, transcript variant X9	protein_coding	XP_010917164.1		316	251	239	177	220067893730886	180719946506896	174014596839487	110147181526538	0.125	0.1693	4058	0.7835	nonDE
105041831	XM_010918878,XM_029263570,XM_029263571	LOC105041831	uncharacterized LOC105041831, transcript variant X1	protein_coding	XP_010917180.1		111	178	139	103	773023297598997	128159962064651	101205142094932	640969474419966	-0.09437	0.09028	3168	0.8834	nonDE
105041837	XM_010918887,XM_010918895,XM_010918902,XM_029264106	LOC105041837	uncharacterized LOC105041837, transcript variant X1	protein_coding	XP_010917189.1		143	127	168	39	995876860870779	91439972933768	122319883970853	242697179634744	0.494	0.3656	2858	0.5773	nonDE
105041846	XM_019849284	LOC105041846	protein OPAQUE1-like	protein_coding	XP_019704843.1	.	582	522	382	383	405314918200555	375839888751393	278132117124201	238341076410531	0.1898	0.4058	4988	0.5416	nonDE
105041847	XM_019849312,XM_029263575,XM_029263576	LOC105041847	splicing factor 3B subunit 1, transcript variant X1	protein_coding	XP_019704871.1		751	885	341	730	523009456303465	637199811388856	248280240678934	454279336239394	0.3566	0.5697	5462	0.4157	nonDE
105041854	XM_010918910	LOC105041854	probable GTP diphosphokinase RSH2, chloroplastic	protein_coding	XP_010917212.1	.	102	118	230	333	710345732928808	849599748518474	167461745912477	207226053380436	-1682	3278	3593	0.01214	downReg
105041858	XM_010918915,XM_029263580,XM_029263581,XM_029263582,XM_029263583	LOC105041858	isoleucine--tRNA ligase, chloroplastic/mitochondrial, transcript variant X5	protein_coding	XP_010917217.1		2427	1641	476	735	169020499393943	118151965027018	346573004584083	457390838542403	1408	3278	6.23	0.01214	upReg
105041860	XM_010918923	LOC105041860	oryzain gamma chain	protein_coding	XP_010917225.1	.	3735	3458	517	1316	260111893381284	248975926303126	376424881029351	818947406152112	1.78	2771	6894	0.02128	upReg
105041861	XM_010918924	LOC105041861	60S ribosomal protein L27a-3	protein_coding	XP_010917226.1	.	150	125	38	134	104462607783648	899999733600079	27667592802931	833882617206558	0.5094	0.4644	2779	0.4938	nonDE
105041902	XM_010918969	LOC105041902	glutamate decarboxylase	protein_coding	XP_010917271.1	.	105	130	363	427	731238254485537	935999722944082	264298320722736	265722296677015	-2095	4263	3892	0.00413	downReg
105041911	XM_010918978,XM_010918980,XM_029263593	LOC105041911	protein NRDE2 homolog, transcript variant X1	protein_coding	XP_010917280.1		141	177	168	158	981948513166293	127439962277771	122319883970853	983234727751016	-0.3817	0.6291	3474	0.3788	nonDE
105041914	XM_010918982,XM_019849473	LOC105041914	transmembrane 9 superfamily member 2, transcript variant X1	protein_coding	XP_010917284.1		270	262	310	156	188032694010567	188639944162577	225709309708121	970788718538978	-0.04686	0.04497	4065	0.9433	nonDE
105041928	XM_010918997	LOC105041928	14-3-3-like protein	protein_coding	XP_010917299.1	.	45	92	103	143	313387823350945	662399803929658	74993738386892	88988965866073	-1294	1578	2618	0.09798	nonDE
105041930	XM_010919000	LOC105041930	40S ribosomal protein S6	protein_coding	XP_010917302.1	.	544	490	275	358	378851057562031	352799895571231	200226000547527	222783564895483	0.3747	0.9108	4798	0.2562	nonDE
105041931	XM_010919002,XR_003800378,XR_003800379	LOC105041931	F-box protein At1g78280, transcript variant X2	protein_coding	XP_010917304.1	.	126	179	415	437	877485905382645	128879961851531	302159237189905	271945301283034	-1845	3909	4129	0.005807	downReg
105041936	XM_010919012,XM_019849489	LOC105041936	polyadenylate-binding protein 2, transcript variant X1	protein_coding	XP_010917314.1		161	157	95	96	112123199021116	11303996654017	691689820073275	597408442177833	0.3996	0.5985	3095	0.3956	nonDE
105041939	XM_019849431	LOC105041939	7-deoxyloganetin glucosyltransferase	protein_coding	XP_019704990.1	.	191	290	35	43	133015720577845	208799938195218	254833091605944	267589198058821	2232	1.26	2733	0.1525	nonDE
105041950	XM_019855145	LOC105041950	protein unc-13 homolog	protein_coding	XP_019710704.1	.	92	171	196	141	640703994406376	123119963556491	142706531299328	877443649448692	-0.744	1006	3323	0.2225	nonDE
105041956	XM_010919031,XM_010919032	LOC105041956	uncharacterized LOC105041956, transcript variant X1	protein_coding	XP_010917333.1		138	198	177	177	961055991609563	142559957802253	128872734897863	110147181526538	-0.4395	0.7242	3566	0.3315	nonDE
105041974	XM_029263605,XR_003800387,XR_003800388,XR_003800389,XR_003800390,XR_003800391,XR_003800392,XR_003800393,XR_003800394	LOC105041974	alpha-aminoadipic semialdehyde synthase, transcript variant X9	protein_coding	XP_029119438.1	.	87	95	206	162	605883125145159	68399979753606	149987476773784	100812674617509	-1337	2251	3159	0.04124	downReg
105041983	XM_010919070,XM_010919071,XM_019849285,XM_019849287,XM_019849288	LOC105041983	1-phosphatidylinositol-3-phosphate 5-kinase FAB1B, transcript variant X4	protein_coding	XP_010917372.1		1330	1365	660	499	926235122348347	982799709091286	480542401314065	310527929840353	0.8967	2248	5925	0.04133	upReg
105041988	XM_010919080	LOC105041988	FCS-Like Zinc finger 17	protein_coding	XP_010917382.1	.	116	109	36	52	807844166860213	784799767699269	262114037080399	323596239512993	0.9971	0.6673	2279	0.3601	nonDE
105041990	XM_010919081	LOC105041990	AT-rich interactive domain-containing protein 4	protein_coding	XP_010917383.1	.	195	235	145	181	135801390118743	169199949916815	105573709379605	112636383368946	0.05607	0.07274	3688	0.9049	nonDE
105041992	XM_010919083	LOC105041992	transcription factor bHLH78	protein_coding	XP_010917385.1	.	535	411	253	373	372583301095012	295919912407706	184207920503725	232118071804512	0.264	0.5064	4714	0.4605	nonDE
105041997	XM_010919090	LOC105041997	ethylene-responsive transcription factor 1	protein_coding	XP_010917392.1	.	53	136	100	176	36910121416889	979199710156886	728094547445553	109524881065936	-1026	1146	2881	0.1802	nonDE
105042003	XM_010919100	LOC105042003	40S ribosomal protein SA	protein_coding	XP_010917402.1	.	194	183	123	94	135104972733518	131759960999052	89555629335803	584962432965794	0.4894	0.7726	3302	0.3111	nonDE
105042004	XM_010919101,XM_029263616,XR_003800395,XR_003800396	LOC105042004	phosphoinositide phosphatase SAC3, transcript variant X1	protein_coding	XP_010917403.1		146	103	111	72	101676938242751	741599780486465	808184947664564	448056331633374	0.1552	0.1474	2861	0.8107	nonDE
105042005	XM_010919102	LOC105042005	RRP12-like protein	protein_coding	XP_010917404.1	.	231	196	103	120	160872415986818	141119958228492	74993738386892	746760552722291	0.5936	1101	3413	0.1917	nonDE
105042006	XM_010919103,XM_010919104,XM_010919105,XM_019849595,XM_029263617	LOC105042006	respiratory burst oxidase homolog protein E, transcript variant X2	protein_coding	XP_010917405.1		33	43	189	215	229817737124026	309599908358427	13760986946721	13379459902941	-2758	1899	2.6	0.06352	nonDE
105042009	XM_010919106,XM_010919107,XM_010919108	LOC105042009	KH domain-containing protein At4g18375, transcript variant X3	protein_coding	XP_010917408.1		1368	1236	1056	1323	952698982986871	889919736583758	768867842102504	823303509376325	-0.2009	0.4669	6.42	0.4919	nonDE
105042013	XM_019849612	LOC105042013	dnaJ homolog subfamily B member 3	protein_coding	XP_019705171.1	.	497	403	108	247	346119440456488	290159914112665	786342111241197	153708213768672	1091	2	4226	0.0563	nonDE
105042018	XM_010919120	LOC105042018	uncharacterized LOC105042018	protein_coding	XP_010917422.1	.	321	193	27	59	223549980657007	138959958867852	196585527810299	367157271755126	2215	1.29	2794	0.1456	nonDE
105042023	XM_010919125	LOC105042023	peroxiredoxin Q, chloroplastic	protein_coding	XP_010917427.1	.	129	75	101	35	898378426939374	539999840160047	735375492920009	217805161210668	0.5759	0.4203	2411	0.5278	nonDE
105042025	XM_010919127,XM_010919128,XM_010919129,XM_010919130,XM_029263621	LOC105042025	uncharacterized LOC105042025, transcript variant X1	protein_coding	XP_010917429.1		686	507	412	320	477742326263884	365039891948192	299974953547568	199136147392611	0.3691	0.7237	4999	0.3317	nonDE
105042029	XM_010919134	LOC105042029	3-oxoacyl-[acyl-carrier-protein] synthase I, chloroplastic	protein_coding	XP_010917436.1	.	116	139	45	66	807844166860213	100079970376329	327642546350499	41071830399726	0.8229	0.7932	2531	0.3016	nonDE
105042031	XM_010919135,XM_029263622,XM_029263623	LOC105042031	auxin response factor 16, transcript variant X1	protein_coding	XP_010917437.3		118	65	106	195	821772514564699	467999861472041	771780220292286	121348589817372	-1056	1427	2961	0.1211	nonDE
105042032	XM_010919137	LOC105042032	20 kDa chaperonin, chloroplastic	protein_coding	XP_010917439.1	.	787	462	161	205	548080482171541	332639901538589	117223222138734	127571594423391	1388	2769	4517	0.02128	upReg
105042047	XM_010919153	LOC105042047	uncharacterized LOC105042047	protein_coding	XP_010917455.2	.	212	183	243	300	147640485667556	131759960999052	176926975029269	186690138180573	-0.7951	1908	3996	0.06292	nonDE
105042051	XM_010919157	LOC105042051	uncharacterized LOC105042051	protein_coding	XP_010917459.1	.	54	77	164	181	376065388021133	554399835897649	119407505781071	112636383368946	-1768	2604	2871	0.0258	downReg
105042052	XM_010919158	LOC105042052	polyadenylate-binding protein-interacting protein 7	protein_coding	XP_010917460.1	.	177	127	124	182	123265877184705	91439972933768	902837238832486	113258683829547	-0.3475	0.5293	3378	0.4438	nonDE
105042074	XM_019849576,XM_019849577,XM_019849578,XM_019849579	LOC105042074	proline--tRNA ligase, cytoplasmic, transcript variant X4	protein_coding	XP_019705135.1		313	312	167	193	217978641575213	22463993350658	121591789423407	120103988896168	0.4574	1006	4035	0.2225	nonDE
105042084	XM_010919179	LOC105042084	cytochrome P450 71A1	protein_coding	XP_010917481.1	.	83	178	284	308	578026429736187	128159962064651	206778851474537	191668541865388	-1634	2715	3715	0.02276	downReg
105042090	XM_010919185,XM_029263634	LOC105042090	aldehyde dehydrogenase family 7 member A1, transcript variant X2	protein_coding	XP_010917487.1		199	131	283	350	13858705965964	943199720812883	206050756927092	217805161210668	-1298	2864	3963	0.01885	downReg
105042098	XM_010919196,XM_029263635	LOC105042098	asparagine synthetase [glutamine-hydrolyzing] 2, transcript variant X2	protein_coding	XP_010917498.1		322	259	189	322	224246398042231	186479944801936	13760986946721	200380748313815	-0.1219	0.1705	4207	0.7831	nonDE
105042102	XM_010919200,XM_029263636,XM_029263637,XM_029263638,XM_029263639,XM_029263640,XM_029263641,XM_029263642,XM_029263643,XM_029263644	LOC105042102	uncharacterized LOC105042102, transcript variant X2	protein_coding	XP_010917502.1		1175	1278	1063	1409	818290427638577	920159727632721	773964503934623	87682134898809	-0.3346	0.8419	6402	0.2827	nonDE
105042112	XM_010919213,XM_010919216,XM_019849368,XM_019849369,XM_019849370	LOC105042112	probable RNA-dependent RNA polymerase 1, transcript variant X1	protein_coding	XP_010917515.1		256	261	396	511	178282850617426	187919944375696	288325440788439	317995535367575	-1141	3038	4559	0.01596	downReg
105042113	XM_010919217,XM_029263646	LOC105042113	two-component response regulator ORR21, transcript variant X1	protein_coding	XP_010917519.1		331	452	302	465	23051415450925	325439903669789	219884553328557	289369714179888	-0.3032	0.5332	4718	0.4412	nonDE
105042116	XM_010919218	LOC105042116	uncharacterized LOC105042116	protein_coding	XP_010917520.1	.	128	116	53	67	891414253087131	835199752780873	385890110146143	416941308603279	0.6705	0.7473	2566	0.3219	nonDE
105042121	XM_010919224	LOC105042121	chlorophyll a-b binding protein, chloroplastic	protein_coding	XP_010917526.1	.	194	103	308	383	135104972733518	741599780486465	22425312061323	238341076410531	-1.61	3.12	3931	0.01433	downReg
105042126	XM_019849262,XR_002164267,XR_002164268	LOC105042126	splicing factor-like protein 1, transcript variant X1	protein_coding	XP_019704821.1	.	247	187	135	34	172015094150407	134639960146572	982927639051497	211582156604649	1.46	1482	3067	0.1113	nonDE
105042129	XM_010919230,XM_029263650	LOC105042129	uncharacterized LOC105042129, transcript variant X2	protein_coding	XP_010917532.1		619	654	372	384	431082361453855	470879860619561	270851171649746	238963376871133	0.4127	1.08	5083	0.1987	nonDE
105042139	XM_010919245,XM_010919246,XM_029263651	LOC105042139	uncharacterized LOC105042139, transcript variant X2	protein_coding	XP_010917547.1		193	122	86	144	134408555348294	878399739993677	626161310803176	896112663266749	0.107	0.11	3179	0.8581	nonDE
105042163	XM_029263774	LOC105042163	phospholipid-transporting ATPase 3	protein_coding	XP_029119607.1	.	544	426	460	256	378851057562031	306719909210907	334923491824954	159308917914089	0.167	0.2063	4812	0.741	nonDE
105042164	XM_010919273,XM_010919274,XM_010919276,XM_019848832	LOC105042164	protein WRKY1, transcript variant X3	protein_coding	XP_010917575.1		108	137	151	444	752130776042267	986399708025686	109942276664279	276301404507248	-1.46	1807	3.62	0.07188	nonDE
105042166	XM_010919277	LOC105042166	CRM-domain containing factor CFM3, chloroplastic/mitochondrial	protein_coding	XP_010917579.1	.	208	197	67	89	144854816126659	141839958015372	487823346788521	553847409935699	1035	1.75	3116	0.07674	nonDE
105042175	XM_010919291,XM_029263669,XR_003800406	LOC105042175	magnesium transporter MRS2-I, transcript variant X2	protein_coding	XP_010917593.1		136	138	79	149	947127643905077	993599705894487	575194692481987	927227686296844	-0.03462	0.03385	3079	0.959	nonDE
105042176	XM_010919292,XM_019849623,XM_019849625,XM_019849626,XM_019849627,XM_029263668	LOC105042176	glutathione reductase, chloroplastic, transcript variant X1	protein_coding	XP_010917594.1		143	100	81	37	995876860870779	719999786880063	589756583430898	230251170422706	0.948	0.8374	2492	0.2836	nonDE
105042197	XM_010919316	LOC105042197	probable aldo-keto reductase 1	protein_coding	XP_010917618.1	.	185	161	39	49	128837216266499	11591996568769	283956873503766	304927225694935	1617	1266	2595	0.1513	nonDE
105042198	XM_010919317	LOC105042198	perakine reductase	protein_coding	XP_010917619.1	.	639	542	81	47	445010709158341	390239884488994	589756583430898	292481216482897	2993	3957	3724	0.005651	upReg
105042200	XM_010919319,XM_010919320	LOC105042200	uncharacterized LOC105042200, transcript variant X1	protein_coding	XP_010917621.1		249	223	207	472	173407928920856	160559952474254	15071557132123	293725817404101	-0.7653	1241	4231	0.1563	nonDE
105042201	XM_010919321,XM_029263682,XM_029263683	LOC105042201	protein SPIRRIG, transcript variant X2	protein_coding	XP_010917623.1		303	580	630	462	211014467722969	417599876390437	458699564890698	287502812798082	-0.7021	1109	5039	0.1896	nonDE
105042204	XM_010919324,XM_010919325	LOC105042204	uncharacterized LOC105042204, transcript variant X1	protein_coding	XP_010917626.1		205	229	158	192	142765563970986	164879951195534	115038938496397	119481688435567	-0.02884	0.03778	3749	0.9543	nonDE
105042206	XM_010919328	LOC105042206	calmodulin	protein_coding	XP_010917630.2	.	146	187	669	1223	101676938242751	134639960146572	487095252241075	761073463316135	-2792	4757	4741	0.002058	downReg
105042211	XM_010919333,XM_010919334	LOC105042211	probable histone H2A variant 3, transcript variant X1	protein_coding	XP_010917635.1		403	323	188	357	280656206245401	23255993116226	136881774919764	222161264434881	0.1241	0.1665	4402	0.787	nonDE
105042227	XM_010919347	LOC105042227	mediator of RNA polymerase II transcription subunit 23	protein_coding	XP_010917649.1	.	1032	1010	771	1006	718702741551499	727199784748864	561360896080521	62603426336552	-0.1265	0.2693	6033	0.6739	nonDE
105042239	XM_010919364,XM_029263695	LOC105042239	GTPase HflX, transcript variant X1	protein_coding	XP_010917666.1		483	335	213	330	336369597063347	241199928604821	155084138605903	20535915199863	0.2545	0.423	4497	0.5261	nonDE
105042241	XM_010919365,XM_010919366,XM_029263696,XM_029263697	LOC105042241	serine/threonine-protein phosphatase 4 regulatory subunit 2, transcript variant X4	protein_coding	XP_010917667.1		286	190	80	88	199175372174156	136799959507212	582475637956443	54762440532968	1135	1836	3277	0.06933	nonDE
105042243	XM_010919369,XM_010919370,XM_010919375,XM_029263698,XM_029263699,XM_029263700,XM_029263701,XM_029263702,XM_029263703,XM_029263704,XM_029263705,XM_029263706	LOC105042243	BEL1-like homeodomain protein 7, transcript variant X10	protein_coding	XP_010917671.1		182	194	141	144	126747964110826	139679958654732	102661331189823	896112663266749	0.06163	0.08012	3502	0.8965	nonDE
105042244	XM_010919376	LOC105042244	probable lactoylglutathione lyase, chloroplastic	protein_coding	XP_010917678.1	.	1008	741	251	306	701988724306116	533519842078127	182751731408834	190423940944184	1298	3328	5.08	0.01144	upReg
105042249	XM_010919383	LOC105042249	CDK5RAP1-like protein	protein_coding	XP_010917685.1	.	236	200	87	79	16435450291294	143999957376013	633442256277631	491617363875508	1.06	1844	3218	0.06849	nonDE
105042251	XM_010919384	LOC105042251	beta-galactosidase 5	protein_coding	XP_010917686.1	.	115	476	774	467	800879993007969	34271989855491	563545179722858	290614315101091	-1707	1791	4697	0.07284	nonDE
105042263	XM_010919397	LOC105042263	chloroplastic import inner membrane translocase subunit TIM22-2	protein_coding	XP_010917699.2	.	235	144	113	65	163658085527715	103679969310729	822746838613475	404495299391241	0.8053	1005	3122	0.2226	nonDE
105042268	XM_010919400	LOC105042268	uncharacterized LOC105042268	protein_coding	XP_010917702.2	.	277	246	493	382	192907615707137	177119947572496	358950611890658	237718775949929	-1064	2456	4541	0.03176	downReg
105042270	XM_010919401,XM_010919402,XM_010919403	LOC105042270	probable ubiquitin-like-specific protease 2B, transcript variant X3	protein_coding	XP_010917703.1		252	329	129	121	175497181076529	236879929883541	939241966204764	75298355732831	0.8671	1673	3715	0.08608	nonDE
105042272	XM_010919408	LOC105042272	photosynthetic NDH subunit of subcomplex B 2, chloroplastic	protein_coding	XP_010917710.1	.	342	287	104	100	238174745746718	206639938834578	757218329343375	622300460601909	1286	2616	3.63	0.02547	upReg
105042282	XM_010919418,XM_019849379	LOC105042282	YTH domain-containing protein ECT4, transcript variant X1	protein_coding	XP_010917720.1		464	427	463	432	323137666744085	307439908997787	337107775467291	268833798980025	-0.3423	0.8192	4947	0.2915	nonDE
105042283	XM_010919419	LOC105042283	probable serine/threonine-protein kinase PBL16	protein_coding	XP_010917721.1	.	133	152	114	95	926235122348347	10943996760577	830027784087931	591185437571813	0.1239	0.1399	3076	0.8192	nonDE
105042287	XM_010919421	LOC105042287	cysteine synthase	protein_coding	XP_010917723.1	.	479	448	246	230	33358392752245	322559904522268	179111258671606	143129105938439	0.6259	1571	4521	0.09845	nonDE
105042289	XM_010919427,XM_029264775	LOC105042289	protein NINJA homolog 1, transcript variant X1	protein_coding	XP_010917729.1		140	83	144	197	97498433931405	597599823110452	10484561483216	122593190738576	-0.9755	1667	3223	0.08662	nonDE
105042290	XM_010919426,XM_010919428,XM_010919430,XM_029263724	LOC105042290	5'-3' exoribonuclease 4, transcript variant X4	protein_coding	XP_010917728.1		333	255	293	323	231906989279699	183599945654416	213331702401547	201003048774417	-0.414	0.9171	4372	0.2542	nonDE
105042299	XM_010919443	LOC105042299	E3 ubiquitin ligase PQT3-like	protein_coding	XP_010917745.1	.	150	135	187	252	104462607783648	971999712288085	136153680372318	156819716071681	-0.9502	2071	3605	0.05186	nonDE
105042301	XM_010919445,XM_010919446,XM_010919447,XM_010919448,XM_029263722	LOC105042301	protein OBERON 1, transcript variant X4	protein_coding	XP_010917747.1		199	178	136	100	13858705965964	128159962064651	990208584525952	622300460601909	0.3723	0.5503	3.36	0.4292	nonDE
105042303	XM_010919451	LOC105042303	serine/threonine-protein kinase EDR1	protein_coding	XP_010917753.1	.	394	276	281	341	274388449778383	198719941178897	2045945678322	212204457065251	-0.247	0.4572	4466	0.4989	nonDE
105042322	XM_010919479,XM_010919481,XM_010919482,XM_010919483,XM_010919485,XM_010919486,XM_019849565,XM_019849566,XM_019849567,XM_019849568,XM_019849569,XM_019849570,XM_019849571,XM_019849572,XM_019849573,XM_019849574,XM_029263712	LOC105042322	protein RDM1, transcript variant X9	protein_coding	XP_010917781.1		134	148	89	101	93319929620059	106559968458249	648004147226542	628523465207928	0.2264	0.2856	3002	0.6573	nonDE
105042371	XM_010919549	LOC105042371	ABC transporter E family member 2	protein_coding	XP_010917851.1	.	326	260	147	174	227032067583129	187199944588816	107029898474496	108280280144732	0.5236	1.1	3.9	0.1921	nonDE
105042372	XM_010919548	LOC105042372	5-methyltetrahydropteroyltriglutamate--homocysteine methyltransferase 1	protein_coding	XP_010917850.1	.	369	344	178	253	256978015147775	247679926686742	129600829445308	157442016532283	0.4015	0.8514	4249	0.2791	nonDE
105042378	XM_010919554,XM_010919555,XM_019849375,XM_019849377,XM_029263732	LOC105042378	helicase sen1, transcript variant X3	protein_coding	XP_010917856.1		320	402	271	294	222853563271783	289439914325785	197313622357745	182956335416961	0.004387	0.006018	4.46	0.993	nonDE
105042383	XM_010919562	LOC105042383	glutamate-rich WD repeat-containing protein 1	protein_coding	XP_010917864.1	.	506	322	94	110	352387196923506	23183993137538	68440887459882	6845305066621	1646	2919	3.81	0.0182	upReg
105042389	XM_010919571	LOC105042389	probable ubiquitin-conjugating enzyme E2 24	protein_coding	XP_010917873.2	.	519	443	380	390	361440622931423	318959905587868	27667592802931	242697179634744	-0.02024	0.03295	4892	0.96	nonDE
105042394	XM_010919578	LOC105042394	serine/threonine-protein kinase TOUSLED	protein_coding	XP_010917880.1	.	185	208	180	190	128837216266499	149759955671053	1310570185402	118237087514363	-0.2544	0.432	3721	0.5193	nonDE
105042399	XM_010919585,XM_010919587,XM_010919589,XM_010919591,XM_019849334,XM_019849335,XM_019849336,XM_019849337,XM_019849338,XM_029263738,XR_002164288,XR_002164289	LOC105042399	ubiquitin carboxyl-terminal hydrolase 12, transcript variant X4	protein_coding	XP_010917887.1		1818	1827	1997	2264	126608680633782	131543961062988	145400481124877	140888824280272	-0.5613	1522	7087	0.1044	nonDE
105042410	XM_010919601	LOC105042410	ABC transporter G family member 22	protein_coding	XP_010917903.1	.	293	422	124	134	204050293870726	303839910063387	902837238832486	833882617206558	1103	2119	3881	0.04843	upReg
105042417	XM_029263742,XR_003800439,XR_003800440,XR_831519	LOC105042417	E3 ubiquitin-protein ligase RHF2A, transcript variant X3	protein_coding	XP_029119575.1	.	878	860	435	687	611454464226954	619199816716854	316721128138816	427520416433511	0.3239	0.7299	5573	0.3295	nonDE
105042420	XM_010919618,XM_010919619,XM_010919620,XM_029263744	LOC105042420	replication factor C subunit 1, transcript variant X1	protein_coding	XP_010917920.1		168	204	286	240	116998120717686	146879956523533	208235040569428	149352110544458	-0.8328	1.74	3.93	0.07767	nonDE
105042421	XM_010919622	LOC105042421	protein WVD2-like 4	protein_coding	XP_010917924.1	.	369	459	555	790	256978015147775	330479902177949	404092473832282	491617363875508	-1029	2679	5173	0.02394	downReg
105042430	XM_010919637,XM_029264741	LOC105042430	MACPF domain-containing protein NSL1, transcript variant X1	protein_coding	XP_010917939.1		315	423	726	1355	219371476345661	304559909850267	528596641445472	843217124115587	-1781	3585	5378	0.008647	downReg
105042431	XM_010919632,XM_019849299,XM_019849300,XM_029263745	LOC105042431	nuclear pore complex protein NUP1, transcript variant X3	protein_coding	XP_010917934.1		147	113	109	50	102373355627975	813599759174471	793623056715653	311150230300954	0.5241	0.5277	2.76	0.4447	nonDE
105042440	XM_010919657,XM_010919658	LOC105042440	uncharacterized LOC105042440, transcript variant X1	protein_coding	XP_010917959.1		266	122	163	190	185247024469669	878399739993677	118679411233625	118237087514363	-0.2985	0.3573	3624	0.585	nonDE
105042442	XM_010919661,XM_010919662,XM_010919663,XM_019849274,XM_029263749	LOC105042442	chromatin modification-related protein EAF1 B, transcript variant X1	protein_coding	XP_010917963.1		517	484	429	491	360047788160974	348479896849951	312352560854142	305549526155537	-0.2154	0.4965	5049	0.4669	nonDE
105042446	XM_010919665,XM_010919666,XM_010919668,XM_010919669,XM_029263750	LOC105042446	target of rapamycin complex subunit LST8, transcript variant X2	protein_coding	XP_010917967.1		292	232	122	188	203353876485502	167039950556175	888275347883575	116992486593159	0.4304	0.7686	3781	0.3136	nonDE
105042454	XM_010919678,XM_010919679,XR_003800506	LOC105042454	filament-like plant protein 4, transcript variant X3	protein_coding	XP_010917980.1		460	368	430	232	320351997203188	264959921571863	313080655401588	144373706859643	0.06307	0.06754	4639	0.9118	nonDE
105042456	XM_010919685,XM_029264737,XR_003800958	LOC105042456	uncharacterized LOC105042456, transcript variant X3	protein_coding	XP_010917987.1		79	108	197	140	550169734327214	777599769830468	143434625846774	871220644842673	-1177	1781	3102	0.07398	nonDE
105042460	XM_010919686	LOC105042460	guanine nucleotide-binding protein-like NSN1	protein_coding	XP_010917988.1	.	329	390	182	238	229121319738802	280799916883225	132513207635091	148107509623254	0.4371	0.9097	4239	0.2566	nonDE
105042476	XM_010919712	LOC105042476	UPF0678 fatty acid-binding protein-like protein At1g79260	protein_coding	XP_010918014.1	.	227	190	85	164	158086746445921	136799959507212	61888036532872	102057275538713	0.4456	0.656	3439	0.3659	nonDE
105042485	XM_010919720,XM_010919729	LOC105042485	60S ribosomal protein L37a-1, transcript variant X2	protein_coding	XP_010918022.1		375	329	311	387	26115651945912	236879929883541	226437404255567	240830278252939	-0.3231	0.7398	4593	0.3249	nonDE
105042494	XM_010919734	LOC105042494	uncharacterized LOC105042494	protein_coding	XP_010918036.1	.	213	223	39	40	14833690305278	160559952474254	283956873503766	248920184240764	2.12	1497	2.69	0.109	nonDE
105042496	XM_010919741,XM_010919747,XM_010919755,XM_029264710	LOC105042496	YTH domain-containing protein ECT4, transcript variant X3	protein_coding	XP_010918043.1		168	179	109	109	116998120717686	128879961851531	793623056715653	678307502056081	0.3336	0.5095	3252	0.458	nonDE
105042497	XM_010919738	LOC105042497	protein TIC110, chloroplastic	protein_coding	XP_010918040.1	.	1677	1311	752	1042	116789195502119	943919720599763	547527099679056	648437079947189	0.4028	0.995	6306	0.2259	nonDE
105042510	XM_010919763	LOC105042510	3-isopropylmalate dehydratase large subunit, chloroplastic	protein_coding	XP_010918065.1	.	627	611	369	314	436653700535649	439919869783719	268666888007409	195402344628999	0.5292	1326	4988	0.1389	nonDE
105042511	XM_010919765	LOC105042511	3-isopropylmalate dehydratase large subunit, chloroplastic-like	protein_coding	XP_010918067.2	.	213	148	81	79	14833690305278	106559968458249	589756583430898	491617363875508	0.8194	1223	3047	0.1605	nonDE
105042519	XM_010919775,XM_010919776,XM_019850052	LOC105042519	cyclin-dependent kinase F-4, transcript variant X1	protein_coding	XP_010918077.1		216	180	136	49	150426155208453	129599961638411	990208584525952	304927225694935	1002	1168	3138	0.1741	nonDE
105042521	XM_010919777,XM_010919778	LOC105042521	probable methyltransferase PMT21, transcript variant X2	protein_coding	XP_010918079.1		327	539	690	644	227728484968353	388079885128354	502385237737432	400761496627629	-1009	2182	5192	0.04484	downReg
105042525	XM_010919782	LOC105042525	ATP-dependent Clp protease proteolytic subunit 4, chloroplastic	protein_coding	XP_010918084.1	.	149	99	73	18	103766190398424	712799789011263	531509019635254	112014082908344	1552	0.7547	2211	0.3183	nonDE
105042532	XM_010919789	LOC105042532	60S ribosomal protein L13-1	protein_coding	XP_010918091.1	.	223	263	177	258	155301076905024	189359943949457	128872734897863	160553518835293	-0.1678	0.2542	3976	0.6898	nonDE
105042541	XM_010919803	LOC105042541	cyclin-dependent kinase E-1	protein_coding	XP_010918105.1	.	177	119	84	10	123265877184705	856799746387275	611599419854265	0.622300460601909	2161	0.8342	2185	0.2847	nonDE
105042554	XM_010919823,XM_010919824	LOC105042554	zeta-carotene desaturase, transcript variant X2	protein_coding	XP_010918125.1		169	76	128	116	11769453810291	547199838028848	931961020730308	721868534298214	-0.4144	0.46	3027	0.4963	nonDE
105042560	XM_010919834	LOC105042560	aconitate hydratase, cytoplasmic	protein_coding	XP_010918136.1	.	1179	1217	1386	1491	821076097179475	876239740633037	100913904275954	927849986757446	-0.603	1806	6502	0.07188	nonDE
105042568	XM_010919849	LOC105042568	24-methylenesterol C-methyltransferase 2	protein_coding	XP_010918151.1	.	105	164	96	74	731238254485537	11807996504833	698970765547731	460502340845413	0.3109	0.3165	2867	0.6254	nonDE
105042570	XM_010919853	LOC105042570	DDB1- and CUL4-associated factor 8	protein_coding	XP_010918155.1	.	219	157	74	144	152515407364126	11303996654017	538789965109709	896112663266749	0.473	0.6345	3261	0.3758	nonDE
105042572	XM_010919858	LOC105042572	UDP-glucose 4-epimerase GEPI48	protein_coding	XP_010918160.1	.	107	119	23	79	745166602190024	856799746387275	167461745912477	491617363875508	0.908	0.5298	2273	0.4435	nonDE
105042580	XM_010919865,XM_010919866,XR_831559	LOC105042580	cleavage and polyadenylation specificity factor subunit 1, transcript variant X1	protein_coding	XP_010918167.1		509	499	284	294	354476449079179	359279893653151	206778851474537	182956335416961	0.4645	1.19	4721	0.1684	nonDE
105042581	XM_010919869	LOC105042581	dynamin-related protein 5A	protein_coding	XP_010918171.1	.	745	986	626	685	518830951992119	709919789863742	455787186700916	426275815512308	0.04851	0.07855	5694	0.899	nonDE
105042585	XM_010919871	LOC105042585	prolyl endopeptidase	protein_coding	XP_010918173.1	.	1050	1105	139	156	731238254485537	79559976450247	101205142094932	970788718538978	2528	5359	4784	0.001432	upReg
105042588	XM_010919877,XM_029263860,XM_029263861	LOC105042588	putative tRNA pseudouridine synthase Pus10, transcript variant X2	protein_coding	XP_010918179.1		191	137	100	127	133015720577845	986399708025686	728094547445553	790321584964424	0.1772	0.2243	3226	0.7216	nonDE
105042633	XM_010919918	LOC105042633	serine/threonine-protein kinase BSK1	protein_coding	XP_010918220.1	.	109	92	103	97	75909494989451	662399803929658	74993738386892	603631446783852	-0.3226	0.4016	2795	0.545	nonDE
105042650	XM_010919934	LOC105042650	protein GRIP	protein_coding	XP_010918236.1	.	112	158	85	133	77998747145124	11375996632705	61888036532872	827659612600539	-0.04417	0.04234	3044	0.9469	nonDE
105042651	XM_010919936,XM_010919937,XR_003800534	LOC105042651	probable serine acetyltransferase 2, transcript variant X1	protein_coding	XP_010918238.1		182	243	80	91	126747964110826	174959948211855	582475637956443	566293419147737	0.9535	1526	3215	0.1037	nonDE
105042653	XM_010919939,XM_010919940,XM_010919941,XR_831561,XR_831563	LOC105042653	ubiquitin domain-containing protein DSK2b, transcript variant X3	protein_coding	XP_010918241.1		252	180	136	144	175497181076529	129599961638411	990208584525952	896112663266749	0.2704	0.4166	3579	0.5312	nonDE
105042655	XM_010919942	LOC105042655	catalase isozyme 1	protein_coding	XP_010918244.1	.	6267	3780	2005	3910	436444775320082	272159919440664	145982956762833	243319480095346	0.467	0.6562	7994	0.3658	nonDE
105042656	XM_010919943,XM_010919945,XM_029263867,XM_029263868	LOC105042656	phosphoinositide phosphatase SAC6, transcript variant X3	protein_coding	XP_010918245.1		346	209	204	312	240960415287615	150479955457933	148531287678893	194157743707796	-0.2505	0.3622	4171	0.581	nonDE
105042658	XM_010919950,XM_019849651	LOC105042658	NPC intracellular cholesterol transporter 1, transcript variant X1	protein_coding	XP_010918252.2		792	516	718	473	551562569097662	371519890030113	522771885065907	294348117864703	-0.1982	0.2769	5398	0.6653	nonDE
105042664	XM_010919958	LOC105042664	signal recognition particle 54 kDa protein 2	protein_coding	XP_010918260.1	.	231	217	128	102	160872415986818	156239953752974	931961020730308	634746469813947	0.6472	1168	3.47	0.1741	nonDE
105042693	XM_010919987	LOC105042693	protein EXORDIUM-like 5	protein_coding	XP_010918289.1	.	43	130	356	108	299459475646458	935999722944082	259201658890617	672084497450062	-1727	1218	3071	0.1613	nonDE
105042695	XM_010919989,XM_029263875	LOC105042695	epidermal growth factor receptor substrate 15, transcript variant X2	protein_coding	XP_010918291.1		140	161	161	217	97498433931405	11591996568769	117223222138734	135039199950614	-0.6619	1319	3536	0.1404	nonDE
105042697	XM_010919992,XM_019850047,XM_029263876,XM_029263877	LOC105042697	pyrophosphate-energized membrane proton pump 3, transcript variant X2	protein_coding	XP_010918294.1		344	418	294	440	239567580517166	300959910915866	214059796948993	27381220266484	-0.2716	0.5095	4674	0.458	nonDE
105042714	XM_010920008,XM_010920009,XM_010920011	LOC105042714	SNARE-interacting protein KEULE, transcript variant X2	protein_coding	XP_010918310.1		208	222	239	220	144854816126659	159839952687374	174014596839487	13690610133242	-0.4289	0.8513	3941	0.2791	nonDE
105042717	XM_010920015,XM_010920016,XR_003800542	LOC105042717	nucleolin, transcript variant X3	protein_coding	XP_010918317.1		215	235	135	185	149729737823229	169199949916815	982927639051497	115125585211353	0.1596	0.2379	3706	0.7092	nonDE
105042722	XM_019850181	LOC105042722	protein argonaute 1A	protein_coding	XP_019705740.1	.	273	254	350	335	19012194616624	182879945867536	254833091605944	208470654301639	-0.7133	1804	4376	0.07188	nonDE
105042733	XM_010920034	LOC105042733	serine hydroxymethyltransferase, mitochondrial	protein_coding	XP_010918336.1	.	5466	3735	2194	3338	380661742763614	268919920399704	159743943709554	207723893748917	0.4042	0.7011	7916	0.3431	nonDE
105042742	XM_010920045,XM_029264660,XR_002165981	LOC105042742	probable inactive ATP-dependent zinc metalloprotease FTSHI 1, chloroplastic, transcript variant X1	protein_coding	XP_010918347.1		388	458	236	299	270209945467037	329759902391069	171830313197151	186067837719971	0.3208	0.663	4532	0.3617	nonDE
105042745	XM_010920049,XM_010920050,XM_029263892	LOC105042745	exosome complex exonuclease RRP44 homolog A, transcript variant X1	protein_coding	XP_010918351.1		353	294	457	602	245835336984185	211679937342739	332739208182618	374624877282349	-1043	2.87	4829	0.01885	downReg
105042746	XM_010920051	LOC105042746	glyceraldehyde-3-phosphate dehydrogenase B, chloroplastic	protein_coding	XP_010918353.1	.	3667	3791	1617	2887	255376255161759	272951919206232	117732888321946	179658142975771	0.4581	0.8175	7615	0.2921	nonDE
105042748	XM_010920053	LOC105042748	serine/threonine-protein kinase/endoribonuclease IRE1b	protein_coding	XP_010918355.1	.	222	276	248	131	154604659519799	198719941178897	180567447766497	815213603388501	0.1334	0.1371	3.87	0.8235	nonDE
105042750	XM_010920054,XM_010920055,XM_019849724	LOC105042750	glutamate receptor 3.1, transcript variant X2	protein_coding	XP_010918356.1		153	147	130	78	106551859939321	105839968671369	946522911679219	485394359269489	0.2704	0.3084	3091	0.6343	nonDE
105042760	XM_010920075	LOC105042760	thioredoxin-like protein YLS8	protein_coding	XP_010918377.1	.	219	488	163	258	152515407364126	351359895997471	118679411233625	160553518835293	0.3154	0.3301	4163	0.6116	nonDE
105042770	XM_010920088	LOC105042770	heat shock cognate 70 kDa protein 2	protein_coding	XP_010918390.1	.	2392	2216	103	92	166583038545658	159551952772622	74993738386892	572516423753756	4232	6398	5034	0.0005937	upReg
105042771	XM_010920089	LOC105042771	uncharacterized LOC105042771	protein_coding	XP_010918391.1	.	265	225	186	170	184550607084445	161999952048014	135425585824873	105791078302325	0.124	0.1835	3.85	0.7677	nonDE
105042772	XM_010920093	LOC105042772	far upstream element-binding protein 3	protein_coding	XP_010918395.1	.	395	515	319	440	275084867163607	370799890243232	232262160635131	27381220266484	-0.07867	0.12	4829	0.8458	nonDE
105042773	XM_010920090	LOC105042773	vacuolar protein sorting-associated protein 2 homolog 1	protein_coding	XP_010918392.1	.	77	261	198	347	536241386622727	187919944375696	14416272039422	215938259828862	-1256	1417	3739	0.1227	nonDE
105042779	XM_010920098,XM_029263900	LOC105042779	bifunctional nitrilase/nitrile hydratase NIT4, transcript variant X1	protein_coding	XP_010918400.1		180	167	63	181	125355129340378	120239964408971	458699564890698	112636383368946	0.3033	0.309	3238	0.6338	nonDE
105042780	XM_010920099	LOC105042780	probable sphingolipid transporter spinster homolog 2	protein_coding	XP_010918401.1	.	191	198	149	148	133015720577845	142559957802253	108486087569387	921004681690825	0.05277	0.06884	3557	0.9105	nonDE
105042791	XM_010920111	LOC105042791	DEAD-box ATP-dependent RNA helicase 47A	protein_coding	XP_010918413.1	.	387	319	139	110	269513528081812	22967993201474	101205142094932	6845305066621	1183	2465	3851	0.03129	upReg
105042792	XM_010920112,XM_019850226,XM_019850227	LOC105042792	myosin-1, transcript variant X2	protein_coding	XP_010918414.1		308	331	273	161	214496554649091	238319929457301	198769811452636	100190374156907	0.28	0.3852	4162	0.5594	nonDE
105042793	XM_010920116,XM_010920122,XM_010920130,XM_010920138,XM_010920146	LOC105042793	serine/threonine protein phosphatase 2A 55 kDa regulatory subunit B beta isoform, transcript variant X1	protein_coding	XP_010918418.1		177	205	261	140	123265877184705	147599956310413	190032676883289	871220644842673	-0.3299	0.3948	3724	0.5499	nonDE
105042794	XM_019849779	LOC105042794	DNA-directed RNA polymerases II, IV and V subunit 12	protein_coding	XP_019705338.1	.	127	121	51	190	884450079234888	871199742124876	371328219197232	118237087514363	-0.08211	0.05755	2938	0.9244	nonDE
105042802	XM_010920125,XM_029263905	LOC105042802	mediator of RNA polymerase II transcription subunit 16, transcript variant X1	protein_coding	XP_010918427.1		979	1081	1103	1462	68179262013461	778319769617348	803088285832445	909803273399991	-0.6404	1855	6303	0.0674	nonDE
105042805	XM_010920128,XM_010920129	LOC105042805	protein STABILIZED1, transcript variant X2	protein_coding	XP_010918430.1		459	580	241	566	319655579817963	417599876390437	175470785934378	35222206070068	0.1246	0.1419	4915	0.817	nonDE
105042809	XM_010920137	LOC105042809	uncharacterized LOC105042809	protein_coding	XP_010918439.1	.	135	115	140	172	940163470052834	827999754912073	101933236642377	107035679223528	-0.6556	1245	3268	0.1557	nonDE
105042810	XM_010920139,XM_010920141,XM_029263907,XR_831591,XR_831592	LOC105042810	RNA polymerase II C-terminal domain phosphatase-like 1, transcript variant X5	protein_coding	XP_010918441.1		256	309	298	314	178282850617426	222479934145939	216972175138775	195402344628999	-0.4614	1022	4342	0.2169	nonDE
105042817	XM_010920158,XM_019850560	LOC105042817	probable protein arginine N-methyltransferase 1, transcript variant X1	protein_coding	XP_010918460.1		210	280	214	361	146247650897107	201599940326418	155812233153348	224650466277289	-0.552	0.9911	4167	0.2269	nonDE
105042818	XM_010920154	LOC105042818	HBS1-like protein	protein_coding	XP_010918456.1	.	103	163	70	72	717309906781051	11735996526145	509666183211887	448056331633374	0.5216	0.5582	2735	0.4235	nonDE
105042819	XM_010920155,XM_029263910	LOC105042819	DNA-directed RNA polymerase I subunit 2, transcript variant X1	protein_coding	XP_010918457.1		336	268	105	81	233996241435372	192959942883857	764499274817831	504063373087546	1383	2514	3527	0.02929	upReg
105042820	XM_010920159	LOC105042820	26S proteasome non-ATPase regulatory subunit 2 homolog A	protein_coding	XP_010918461.1	.	2183	1966	1230	1431	152027915194469	14155195810062	89555629335803	890511959121332	0.3033	0.7397	6839	0.3249	nonDE
105042823	XM_010920161	LOC105042823	vacuolar-sorting protein BRO1	protein_coding	XP_010918463.1	.	187	268	390	236	130230051036948	192959942883857	283956873503766	146862908702051	-0.763	1194	4172	0.1673	nonDE
105042824	XM_010920162	LOC105042824	ferredoxin-thioredoxin reductase, variable chain	protein_coding	XP_010918464.1	.	301	273	222	324	209621632952521	196559941818257	161636989532913	201625349235018	-0.2505	0.4623	4261	0.4946	nonDE
105042831	XM_010920171	LOC105042831	ABC transporter G family member 11	protein_coding	XP_010918473.1	.	357	251	242	216	248621006525083	180719946506896	176198880481824	134416899490012	0.05843	0.0776	4178	0.8995	nonDE
105042844	XM_010920183,XM_019850153,XM_019850154	LOC105042844	uncharacterized LOC105042844, transcript variant X1	protein_coding	XP_010918485.1		268	244	144	139	186639859240118	175679947998735	10484561483216	864997640236653	0.5194	1046	3719	0.2098	nonDE
105042848	XM_010920188	LOC105042848	monothiol glutaredoxin-S11	protein_coding	XP_010918490.2	.	247	219	111	169	172015094150407	157679953326734	808184947664564	105168777841723	0.4101	0.7172	3627	0.3355	nonDE
105042857	XM_010920200,XM_019850118	LOC105042857	luminal-binding protein 4, transcript variant X2	protein_coding	XP_010918502.1		752	1693	174	99	52370587368869	121895963918795	126688451255526	61607745599589	2795	3331	4735	0.01143	upReg
105042871	XM_010920218,XM_010920219,XM_010920220,XM_010920221	LOC105042871	F-box/LRR-repeat protein At3g48880, transcript variant X1	protein_coding	XP_010918520.1		134	149	67	75	93319929620059	107279968245129	487823346788521	466725345451432	0.6491	0.8832	2796	0.2671	nonDE
105042873	XM_010920223	LOC105042873	NAD-dependent malic enzyme 59 kDa isoform, mitochondrial	protein_coding	XP_010918525.1	.	966	849	903	1193	672739194126694	611279819061174	657469376343334	742404449498077	-0.535	1576	6065	0.0982	nonDE
105042874	XM_010920236,XM_029264622,XM_029264625,XM_029264626	LOC105042874	G patch domain-containing protein 8, transcript variant X2	protein_coding	XP_010918538.1		98	122	105	72	682489037519835	878399739993677	764499274817831	448056331633374	0.01514	0.0126	2758	0.9858	nonDE
105042882	XM_010920241	LOC105042882	tripeptidyl-peptidase 2	protein_coding	XP_010918543.1	.	286	403	225	254	199175372174156	290159914112665	163821273175249	158064316992885	0.1616	0.2428	4.3	0.704	nonDE
105042885	XM_010920244	LOC105042885	tubulin beta chain	protein_coding	XP_010918546.1	.	144	178	248	240	100284103472302	128159962064651	180567447766497	149352110544458	-0.9446	2051	3774	0.05332	nonDE
105042890	XM_010920253	LOC105042890	probable phospholipid hydroperoxide glutathione peroxidase	protein_coding	XP_010918555.1	.	552	440	135	49	384422396643825	316799906227228	982927639051497	304927225694935	2326	3109	3795	0.01454	upReg
105042892	XM_010920254	LOC105042892	FT-interacting protein 3	protein_coding	XP_010918556.1	.	35	55	106	162	243746084828512	395999882784035	771780220292286	100812674617509	-1949	1448	2399	0.1172	nonDE
105042902	XM_010920264	LOC105042902	mediator of RNA polymerase II transcription subunit 12	protein_coding	XP_010918566.1	.	635	562	403	494	442225039617444	404639880226595	293422102620558	307416427537343	0.08003	0.1517	5157	0.8053	nonDE
105042904	XM_029263922	LOC105042904	UDP-N-acetylmuramoyl-L-alanyl-D-glutamate--2,6-diaminopimelate ligase MurE homolog, chloroplastic	protein_coding	XP_029119755.1	.	193	183	45	48	134408555348294	131759960999052	327642546350499	298704221088916	1673	1489	2699	0.1104	nonDE
105042905	XM_010920271	LOC105042905	U-box domain-containing protein 33	protein_coding	XP_010918573.1	.	203	160	212	352	141372729200537	11519996590081	154356044058457	219049762131872	-0.9476	1.95	3941	0.05911	nonDE
105042909	NM_001303605	LOC105042909	probable aquaporin PIP1-2	protein_coding	NP_001290534.1	.	412	378	321	407	28692396271242	272159919440664	233718349730023	253276287464977	-0.2151	0.4548	4706	0.5004	nonDE
105042910	XM_010920278,XM_010920280,XM_010920281,XM_010920282,XM_019849967	LOC105042910	mitogen-activated protein kinase kinase kinase YODA, transcript variant X2	protein_coding	XP_010918580.1		386	423	464	480	268817110696588	304559909850267	337835870014737	298704221088916	-0.5626	1.53	4916	0.1033	nonDE
105042925	XM_010920294,XR_002164535,XR_831609	LOC105042925	syndetin, transcript variant X1	protein_coding	XP_010918596.1	.	367	313	378	357	255585180377326	22535993329346	275219738934419	222161264434881	-0.4504	1078	4609	0.1989	nonDE
105042927	XM_029264613,XM_029264614	LOC105042927	pentatricopeptide repeat-containing protein At2g15690, mitochondrial, transcript variant X1	protein_coding	XP_029120446.1		783	595	209	104	545294812630643	428399873193638	152171760416121	647192479025985	1.9	3233	4456	0.01259	upReg
105042928	XM_010920296,XM_010920297,XM_010920298	LOC105042928	phosphoglucan phosphatase DSP4, amyloplastic, transcript variant X3	protein_coding	XP_010918598.1		183	130	101	93	127444381496051	935999722944082	735375492920009	578739428359775	0.3454	0.4567	3084	0.4991	nonDE
105042932	XM_010920306	LOC105042932	inactive protein kinase SELMODRAFT_444075	protein_coding	XP_010918608.1	.	68	97	549	425	473563821952538	698399793273661	399723906547609	264477695755811	-2908	4195	3779	0.004663	downReg
105042935	XM_010920307	LOC105042935	arsenate reductase 2.2	protein_coding	XP_010918609.1	.	318	318	79	87	221460728501334	22895993222786	575194692481987	541401400723661	1595	2993	3492	0.01674	upReg
105042936	XM_010920308	LOC105042936	E3 ubiquitin-protein ligase RFWD3	protein_coding	XP_010918610.1	.	106	224	140	104	738202428337781	161279952261134	101933236642377	647192479025985	0.02133	0.01653	3.24	0.9805	nonDE
105042938	XM_010920310,XM_010920311	LOC105042938	uncharacterized LOC105042938, transcript variant X1	protein_coding	XP_010918612.1		230	202	133	202	160175998601594	145439956949773	968365748102586	125704693041586	0.04618	0.05857	3702	0.9233	nonDE
105042948	XM_010920324,XM_010920325,XM_029263933,XM_029263934	LOC105042948	mitochondrial outer membrane protein porin 6, transcript variant X4	protein_coding	XP_010918626.1		260	122	61	106	181068520158324	878399739993677	444137673941787	659638488238023	0.7831	0.8398	3053	0.2831	nonDE
105042954	XM_010920331,XM_019849664,XR_002164427,XR_003800558,XR_003800559	LOC105042954	uncharacterized LOC105042954, transcript variant X3	protein_coding	XP_010918633.1		535	507	189	297	372583301095012	365039891948192	13760986946721	184823236798767	0.7866	1925	4602	0.06112	nonDE
105042955	XM_010920332	LOC105042955	uncharacterized LOC105042955	protein_coding	XP_010918634.1	.	284	331	76	185	197782537403707	238319929457301	55335185605862	115125585211353	0.9843	1566	3723	0.09887	nonDE
105042956	XM_010920333,XM_019850048,XM_029263935	LOC105042956	pre-mRNA-processing protein 40A, transcript variant X1	protein_coding	XP_010918635.1		655	632	335	370	45615338732193	4550398653082	24391167339426	230251170422706	0.53	1499	5.04	0.1087	nonDE
105042960	XM_019849677,XM_029263936,XM_029263937,XM_029263938	LOC105042960	putative ribosomal large subunit pseudouridine synthase SVR1, chloroplastic, transcript variant X2	protein_coding	XP_019705236.1		222	131	91	33	154604659519799	943199720812883	662566038175453	20535915199863	1497	1307	2748	0.1427	nonDE
105042964	XM_010920345,XM_010920346,XM_010920347,XM_010920348	LOC105042964	F-box protein SKIP31, transcript variant X1	protein_coding	XP_010918647.1		155	187	152	122	10794469470977	134639960146572	110670371211724	759206561934329	-0.006134	0.006556	3399	0.993	nonDE
105042965	XM_010920350,XM_010920368,XM_029264590	LOC105042965	K(+) efflux antiporter 4, transcript variant X3	protein_coding	XP_010918652.1		101	105	119	55	703381559076564	755999776224066	866432511460208	34226525333105	0.06205	0.04597	2664	0.942	nonDE
105042968	XM_010920352	LOC105042968	RNA polymerase sigma factor sigB	protein_coding	XP_010918654.1	.	309	323	170	90	215192972034315	23255993116226	123776073065744	560070414541718	1046	1748	3775	0.07683	nonDE
105042992	XM_010920377,XM_010920378	LOC105042992	ruBisCO large subunit-binding protein subunit alpha, transcript variant X1	protein_coding	XP_010918679.1		1690	1273	229	188	11769453810291	91655972869832	166733651365032	116992486593159	2485	5023	5253	0.001807	upReg
105042993	XM_010920380,XM_010920382,XM_019850219,XM_019850220,XM_029263948,XM_029263949	LOC105042993	OTU domain-containing protein DDB_G0284757, transcript variant X2	protein_coding	XP_010918682.1		149	91	135	109	103766190398424	655199806060857	982927639051497	678307502056081	-0.3705	0.4612	3043	0.4953	nonDE
105042994	XM_010920386,XM_010920387	LOC105042994	serine/threonine-protein kinase PCRK1, transcript variant X1	protein_coding	XP_010918688.1		141	122	142	180	981948513166293	878399739993677	103389425737269	112014082908344	-0.626	1201	3327	0.1655	nonDE
105042999	XM_010920394	LOC105042999	WD repeat-containing protein 3	protein_coding	XP_010918696.1	.	198	186	73	55	137890642274416	133919960359692	531509019635254	34226525333105	1299	1858	2936	0.06732	nonDE
105043001	XM_010920396,XM_029263952	LOC105043001	lysine-specific demethylase SE14, transcript variant X1	protein_coding	XP_010918698.1		205	146	135	170	142765563970986	105119968884489	982927639051497	105791078302325	-0.1488	0.2026	3487	0.746	nonDE
105043024	XM_010920415	LOC105043024	pheophorbide a oxygenase, chloroplastic	protein_coding	XP_010918717.1	.	216	166	82	82	150426155208453	11951996462209	597037528905354	510286377693565	0.8731	1418	3111	0.1224	nonDE
105043025	XM_029263966,XM_029263967,XM_029263968,XM_029263969,XM_029263970,XR_003800588,XR_003800589,XR_003800590	LOC105043025	protein SHOOT GRAVITROPISM 6, transcript variant X7	protein_coding	XP_029119799.1		372	346	362	315	259067267303447	249119926260502	26357022617529	196024645089601	-0.2454	0.4836	4589	0.4773	nonDE
105043028	XM_010920418	LOC105043028	silicon efflux transporter LSI2	protein_coding	XP_010918720.1	.	217	175	208	284	151122572593678	125999962704011	151443665868675	176733330810942	-0.661	1.44	3913	0.1187	nonDE
105043032	XM_010920471	LOC105043032	GTP-binding nuclear protein Ran1B	protein_coding	XP_010918773.1	.	204	206	58	104	142069146585762	148319956097293	422294837518421	647192479025985	1024	1618	3129	0.09286	nonDE
105043034	XM_010920441,XM_019850257	LOC105043034	uncharacterized LOC105043034, transcript variant X2	protein_coding	XP_010918743.1		183	207	135	179	127444381496051	149039955884173	982927639051497	111391782447742	-0.02327	0.02871	3.59	0.9666	nonDE
105043037	XM_010920443	LOC105043037	bifunctional L-3-cyanoalanine synthase/cysteine synthase 1, mitochondrial	protein_coding	XP_010918745.1	.	127	138	242	404	884450079234888	993599705894487	176198880481824	251409386083171	-1.59	3121	3816	0.01433	downReg
105043038	XM_010920444	LOC105043038	ATP-dependent helicase BRM	protein_coding	XP_010918746.1	.	694	789	600	674	483313665345679	56807983184837	436856728467332	419430510445687	-0.1215	0.2473	5567	0.6975	nonDE
105043039	XM_029261540	LOC105043039	uncharacterized LOC105043039	protein_coding	XP_029117373.1	.	168	161	80	101	116998120717686	11591996568769	582475637956443	628523465207928	0.5215	0.8155	3076	0.2925	nonDE
105043061	XM_010920476,XM_029263956	LOC105043061	poly [ADP-ribose] polymerase 1, transcript variant X1	protein_coding	XP_010918778.2		105	52	93	133	731238254485537	374399889177633	677127929124364	827659612600539	-0.9205	1149	2654	0.1794	nonDE
105043063	XM_010920478,XM_019849657	LOC105043063	signal recognition particle receptor subunit beta, transcript variant X1	protein_coding	XP_010918780.1		175	116	89	49	121873042414256	835199752780873	648004147226542	304927225694935	0.8439	0.9384	2752	0.2454	nonDE
105043066	XM_010920482,XM_029263954,XM_029263955	LOC105043066	autophagy-related protein 9, transcript variant X2	protein_coding	XP_010918784.1		99	113	104	83	689453211372078	813599759174471	757218329343375	516509382299584	-0.136	0.1368	2782	0.8238	nonDE
105043070	XM_010920488	LOC105043070	WAT1-related protein At5g07050-like	protein_coding	XP_010918790.1	.	136	155	68	84	947127643905077	11159996696641	495104292262976	522732386905603	0.5892	0.8159	2862	0.2924	nonDE
105043075	XM_010920495,XM_010920496,XM_010920497,XM_010920498	LOC105043075	programmed cell death protein 2, transcript variant X2	protein_coding	XP_010918797.1		111	110	70	90	773023297598997	791999765568069	509666183211887	560070414541718	0.126	0.1266	2701	0.8371	nonDE
105043079	XM_010920504,XM_010920505	LOC105043079	probable inorganic phosphate transporter 1-8, transcript variant X1	protein_coding	XP_010918806.1		286	324	233	538	199175372174156	23327993094914	169646029554814	334797647803827	-0.5758	0.8894	4505	0.2647	nonDE
105043116	XM_010920568	LOC105043116	GTP-binding nuclear protein Ran-A1	protein_coding	XP_010918870.1	.	560	611	243	202	38999373572562	439919869783719	176926975029269	125704693041586	1066	2.61	4638	0.02569	upReg
105043118	XM_010920532,XM_029264016	LOC105043118	CLIP-associated protein, transcript variant X1	protein_coding	XP_010918834.1		140	205	436	264	97498433931405	147599956310413	317449222686261	164287321598904	-1329	2178	4052	0.04508	downReg
105043119	XM_010920534	LOC105043119	chaperonin CPN60-2, mitochondrial	protein_coding	XP_010918836.1	.	372	338	52	33	259067267303447	243359927965461	378609164671688	20535915199863	2813	2207	3075	0.04355	upReg
105043124	XM_010920542,XM_019850054,XM_029264013,XM_029264014	LOC105043124	DNA mismatch repair protein MSH1, mitochondrial, transcript variant X3	protein_coding	XP_010918844.1		160	115	76	0	111426781635891	827999754912073	55335185605862	0	4126	0.5836	1002	0.406	nonDE
105043126	XM_010920543,XM_019850197,XM_019850198,XM_019850199,XM_019850200,XM_019850201,XM_029264012	LOC105043126	uncharacterized LOC105043126, transcript variant X1	protein_coding	XP_010918845.1		118	266	255	160	821772514564699	191519943310097	185664109598616	995680736963054	-0.5246	0.5651	3711	0.4184	nonDE
105043128	XM_010920544,XM_029264011	LOC105043128	protein PIR, transcript variant X1	protein_coding	XP_010918846.1		296	309	425	334	206139546026399	222479934145939	30944018266436	207848353841038	-0.6498	1.46	4545	0.1151	nonDE
105043129	XM_010920545	LOC105043129	probable leucine-rich repeat receptor-like protein kinase At5g63930	protein_coding	XP_010918847.1	.	90	182	133	138	626775646701889	131039961212171	968365748102586	858774635630634	-0.4321	0.5126	3.19	0.4558	nonDE
105043132	XM_010920550,XR_003800597	LOC105043132	xyloglucan galactosyltransferase KATAMARI1 homolog, transcript variant X2	protein_coding	XP_010918852.1	.	128	80	201	272	891414253087131	575999829504051	146347004036556	169265725283719	-1537	2806	3414	0.02026	downReg
105043146	XM_010920569	LOC105043146	protein VACUOLELESS1	protein_coding	XP_010918871.1	.	137	172	241	217	95409181775732	123839963343371	175470785934378	135039199950614	-0.9117	1878	3697	0.06549	nonDE
105043147	XM_010920565,XM_019850083,XM_029263999	LOC105043147	myosin-6, transcript variant X3	protein_coding	XP_010918867.1		553	597	487	354	38511881402905	429839872767398	354582044605984	220294363053076	0.1367	0.216	5077	0.7303	nonDE
105043149	XM_010920572,XM_010920573,XM_010920574,XM_010920575,XM_010920576,XM_019850192,XM_019850193,XM_029263993,XM_029263995,XR_003800594	LOC105043149	uncharacterized LOC105043149, transcript variant X10	protein_coding	XP_010918874.1		147	95	116	74	102373355627975	68399979753606	844589675036842	460502340845413	0.05404	0.04561	2.86	0.9425	nonDE
105043153	XM_010920586,XM_029263983,XM_029263984	LOC105043153	protein CHROMATIN REMODELING 20, transcript variant X1	protein_coding	XP_010918888.1		117	137	129	144	814808340712456	986399708025686	939241966204764	896112663266749	-0.4489	0.7393	3186	0.3249	nonDE
105043155	XM_010920591	LOC105043155	3-ketoacyl-CoA thiolase 2, peroxisomal	protein_coding	XP_010918893.1	.	44	118	138	126	306423649498701	849599748518474	100477047547486	784098580358405	-1224	1426	2759	0.1211	nonDE
105043160	XM_010920597,XM_029263980	LOC105043160	inosine triphosphate pyrophosphatase, transcript variant X2	protein_coding	XP_010918899.1		139	143	42	95	968020165461806	102959969523849	305799709927132	591185437571813	0.7293	0.824	2713	0.2888	nonDE
105043168	XM_010920608,XM_019850239	LOC105043168	exosome complex exonuclease RRP44 homolog A, transcript variant X2	protein_coding	XP_010918910.1		283	285	358	356	197086120018483	205199939260818	260657847985508	22153896397428	-0.6668	1725	4461	0.07947	nonDE
105043173	XM_010920617,XM_029263973,XM_029263974	LOC105043173	pullulanase 1, chloroplastic, transcript variant X1	protein_coding	XP_010918919.1		144	161	108	48	100284103472302	11591996568769	786342111241197	298704221088916	0.8015	0.9135	2862	0.2557	nonDE
105043175	XM_010920622,XR_003800593	LOC105043175	protein fluG, transcript variant X2	protein_coding	XP_010918924.1	.	278	358	261	183	193604033092361	257759923703063	190032676883289	113880984290149	0.1971	0.2688	4183	0.6742	nonDE
105043189	XM_019850129,XM_019850130,XM_019850131	LOC105043189	ABC transporter C family member 5, transcript variant X1	protein_coding	XP_019705688.1		181	179	180	174	126051546725602	128879961851531	1310570185402	108280280144732	-0.3112	0.5483	3627	0.4305	nonDE
105043193	XM_010920649,XM_010920651	LOC105043193	bifunctional riboflavin kinase/FMN phosphatase, transcript variant X2	protein_coding	XP_010918951.1		245	164	102	119	170622259379959	11807996504833	742656438394464	740537548116272	0.5227	0.8297	3364	0.2862	nonDE
105043195	XM_010920652,XM_019850232,XM_029264018,XM_029264019	LOC105043195	tryptophan decarboxylase 2, transcript variant X1	protein_coding	XP_010918954.1		353	267	113	100	245835336984185	192239943096977	822746838613475	622300460601909	1203	2.35	3645	0.03612	upReg
105043202	XM_029264020,XM_029264021,XM_029264022,XM_029264023,XM_029264024,XM_029264025,XM_029264026	LOC105043202	uncharacterized LOC105043202, transcript variant X4	protein_coding	XP_029119853.1		236	248	117	161	16435450291294	178559947146256	851870620511297	100190374156907	0.4664	0.8781	3657	0.2689	nonDE
105043204	XM_010920662	LOC105043204	beta-amylase 1, chloroplastic	protein_coding	XP_010918964.1	.	437	360	219	115	304334397343028	259199923276823	159452705890576	715645529692195	1006	1729	4118	0.07895	nonDE
105043208	XM_010920667,XM_010920668,XM_010920670,XM_029264029	LOC105043208	D-ribulose kinase, transcript variant X2	protein_coding	XP_010918969.2		323	240	50	49	224942815427456	172799948851215	364047273722777	304927225694935	2167	2114	3027	0.04874	upReg
105043210	XM_010920673,XM_019850063,XM_019850064,XR_003800598	LOC105043210	uncharacterized LOC105043210, transcript variant X4	protein_coding	XP_010918975.1		134	159	66	208	93319929620059	11447996611393	480542401314065	129438495805197	-0.08245	0.0645	3181	0.9161	nonDE
105043212	XM_010920676,XM_010920677	LOC105043212	protein MICRORCHIDIA 2, transcript variant X1	protein_coding	XP_010918978.1		173	128	80	26	120480207643808	921599727206481	582475637956443	161798119756496	1532	1.09	2519	0.1955	nonDE
105043215	XM_010920682,XM_010920683	LOC105043215	V-type proton ATPase subunit a3, transcript variant X2	protein_coding	XP_010918984.1		382	330	379	384	266031441155691	237599929670421	275947833481865	238963376871133	-0.4398	1098	4669	0.1923	nonDE
105043219	XM_010920687	LOC105043219	UTP:RNA uridylyltransferase 1	protein_coding	XP_010918989.2	.	251	109	102	63	174800763691305	784799767699269	742656438394464	392049290179203	0.7502	0.724	2998	0.3316	nonDE
105043224	XM_010920695,XR_002164423,XR_003800601,XR_003800602,XR_003800603,XR_003800604,XR_003800605,XR_831658,XR_831659,XR_831660,XR_831662	LOC105043224	PGR5-like protein 1A, chloroplastic, transcript variant X9	protein_coding	XP_010918997.1	.	157	167	77	72	109337529480218	120239964408971	560632801533076	448056331633374	0.7876	1189	2929	0.1688	nonDE
105043225	XM_010920696	LOC105043225	polygalacturonate 4-alpha-galacturonosyltransferase	protein_coding	XP_010918998.1	.	376	306	159	124	261852936844345	220319934785299	115767033043843	771652571146367	0.9472	1986	3917	0.05733	nonDE
105043247	XM_010920718	LOC105043247	uncharacterized LOC105043247	protein_coding	XP_010919020.1	.	128	131	126	228	891414253087131	943199720812883	917399129781397	141884505017235	-0.742	1252	3359	0.1543	nonDE
105043252	XM_010920726	LOC105043252	nascent polypeptide-associated complex subunit alpha-like protein 4	protein_coding	XP_010919028.1	.	203	188	76	185	141372729200537	135359959933452	55335185605862	115125585211353	0.3381	0.4031	3399	0.5441	nonDE
105043253	XM_010920727,XM_019850285,XM_029264034	LOC105043253	serine/threonine-protein kinase ATG1a, transcript variant X1	protein_coding	XP_010919029.1		20	0	157	122	139283477044864	0	114310843948952	759206561934329	-5762	0.8885	0.5419	0.265	nonDE
105043264	XM_010920744	LOC105043264	arginase 1, mitochondrial	protein_coding	XP_010919046.1	.	352	270	86	108	245138919598961	194399942457617	626161310803176	672084497450062	1329	2564	3578	0.02746	upReg
105043265	XM_010920745	LOC105043265	FAM10 family protein At4g22670	protein_coding	XP_010919047.2	.	137	176	131	116	95409181775732	126719962490891	953803857153675	721868534298214	0.0001209	0.000125	3261	0.9997	nonDE
105043266	XM_010920746	LOC105043266	uncharacterized LOC105043266	protein_coding	XP_010919048.1	.	241	279	74	97	167836589839061	200879940539538	538789965109709	603631446783852	1257	2244	3361	0.04159	upReg
105043276	XM_010920760,XM_010920761,XM_029264039,XM_029264040	LOC105043276	probable cinnamyl alcohol dehydrogenase 1, transcript variant X1	protein_coding	XP_010919062.1		118	100	88	65	821772514564699	719999786880063	640723201752087	404495299391241	0.211	0.2075	2654	0.7395	nonDE
105043279	XM_010920768	LOC105043279	60S ribosomal protein L9	protein_coding	XP_010919070.1	.	332	299	130	252	231210571894475	215279936277139	946522911679219	156819716071681	0.4452	0.7563	4046	0.3179	nonDE
105043293	XM_010920785	LOC105043293	homeobox protein knotted-1-like 3	protein_coding	XP_010919087.1	.	288	197	140	212	200568206944605	141839958015372	101933236642377	131927697647605	0.1221	0.1587	3.81	0.7968	nonDE
105043300	XM_010920795,XM_010920796,XM_019850075	LOC105043300	uncharacterized LOC105043300, transcript variant X1	protein_coding	XP_010919097.1		268	361	488	549	186639859240118	259919923063703	35531013915343	341642952870448	-1077	2734	4794	0.02229	downReg
105043303	XM_019850176,XM_019850177,XM_019850178	LOC105043303	mechanosensitive ion channel protein 1, mitochondrial, transcript variant X3	protein_coding	XP_019705735.1		155	168	93	195	10794469470977	120959964195851	677127929124364	121348589817372	-0.1089	0.1154	3352	0.8512	nonDE
105043312	XM_010920811	LOC105043312	mitogen-activated protein kinase 2	protein_coding	XP_010919113.1	.	158	240	152	114	110033946865443	172799948851215	110670371211724	709422525086176	0.2386	0.2821	3471	0.6609	nonDE
105043313	XM_010920812	LOC105043313	50S ribosomal protein L5, chloroplastic	protein_coding	XP_010919114.1	.	232	239	60	116	161568833372043	172079949064335	436856728467332	721868534298214	1116	1821	3281	0.07061	nonDE
105043314	XM_010920813,XM_029264053	LOC105043314	beta-carotene 3-hydroxylase 2, chloroplastic, transcript variant X1	protein_coding	XP_010919115.1		122	66	98	104	849629209973672	475199859340842	713532656496642	647192479025985	-0.4894	0.573	2724	0.4135	nonDE
105043318	XM_010920822	LOC105043318	2-C-methyl-D-erythritol 2,4-cyclodiphosphate synthase, chloroplastic	protein_coding	XP_010919124.2	.	315	272	78	134	219371476345661	195839942031377	567913747007531	833882617206558	1.15	2182	3583	0.04484	upReg
105043320	XM_010920826	LOC105043320	CAAX prenyl protease 1 homolog	protein_coding	XP_010919128.1	.	288	235	215	104	200568206944605	169199949916815	156540327700794	647192479025985	0.4913	0.6313	3771	0.3775	nonDE
105043323	XM_010920829,XR_002164545,XR_002164546	LOC105043323	DUF21 domain-containing protein At2g14520, transcript variant X1	protein_coding	XP_010919131.1	.	152	118	61	146	105855442554097	849599748518474	444137673941787	908558672478787	0.1208	0.1087	2963	0.8591	nonDE
105043338	XM_019850051	LOC105043338	ubiquitin fusion degradation protein 1 homolog	protein_coding	XP_019705610.1	.	250	159	113	229	17410434630608	11447996611393	822746838613475	142506805477837	-0.04606	0.04508	3632	0.9433	nonDE
105043342	XM_010920851,XM_029264060	LOC105043342	lysine-specific histone demethylase 1 homolog 3, transcript variant X1	protein_coding	XP_010919153.1		452	509	319	393	314780658121393	366479891521952	232262160635131	24456408101655	0.09478	0.1682	4832	0.7848	nonDE
105043354	XM_010920871,XM_010920872,XM_010920873,XM_010920874	LOC105043354	protein Spindly, transcript variant X4	protein_coding	XP_010919173.1		240	170	181	130	167140172453837	122399963769611	131785113087645	808990598782482	0.07567	0.08496	3607	0.8901	nonDE
105043360	XM_010920880,XM_010920882	LOC105043360	K(+) efflux antiporter 5, transcript variant X2	protein_coding	XP_010919182.1		53	79	162	185	36910121416889	56879983163525	11795131668618	115125585211353	-1773	2599	2877	0.0259	downReg
105043377	XM_019850060,XM_019850061,XM_019850062	LOC105043377	SPX domain-containing membrane protein OsI_17046, transcript variant X2	protein_coding	XP_019705619.1		219	233	199	200	152515407364126	167759950343055	144890814941665	124460092120382	-0.159	0.2542	3877	0.6898	nonDE
105043384	XM_010920912,XM_019850276	LOC105043384	cell division control protein 2 homolog A, transcript variant X1	protein_coding	XP_010919214.1		75	131	162	184	522313038918241	943199720812883	11795131668618	114503284750751	-1152	1897	3181	0.06369	nonDE
105043396	XM_010920924	LOC105043396	BAG family molecular chaperone regulator 2	protein_coding	XP_010919226.1	.	88	104	146	158	612847298997403	748799778355266	106301803927051	983234727751016	-1007	1817	3063	0.0708	nonDE
105043405	XM_010920940	LOC105043405	uncharacterized LOC105043405	protein_coding	XP_010919242.1	.	434	376	296	175	302245145187355	270719919866904	215515986043884	108902580605334	0.5036	0.8394	4.39	0.2831	nonDE
105043409	XM_010920941	LOC105043409	COP9 signalosome complex subunit 1	protein_coding	XP_010919243.1	.	326	183	239	287	227032067583129	131759960999052	174014596839487	178600232192748	-0.4353	0.7311	4129	0.3291	nonDE
105043416	XM_010920948,XM_010920950,XM_029264078	LOC105043416	homeobox-leucine zipper protein ROC5, transcript variant X3	protein_coding	XP_010919250.1		146	106	141	193	101676938242751	763199774092867	102661331189823	120103988896168	-0.7456	1375	3311	0.1291	nonDE
105043419	XM_010920957,XM_010920958,XM_029264080	LOC105043419	shaggy-related protein kinase epsilon, transcript variant X1	protein_coding	XP_010919259.1		84	88	138	157	58499060358843	633599812454456	100477047547486	977011723144997	-1114	1962	2964	0.05827	nonDE
105043423	XM_010920961,XM_010920962	LOC105043423	E3 ubiquitin-protein ligase At1g12760, transcript variant X2	protein_coding	XP_010919263.1		180	175	113	130	125355129340378	125999962704011	822746838613475	808990598782482	0.2079	0.3061	3345	0.6367	nonDE
105043434	XM_010920976	LOC105043434	methyltransferase-like protein 17, mitochondrial	protein_coding	XP_010919278.1	.	180	127	67	74	125355129340378	91439972933768	487823346788521	460502340845413	0.7647	1029	2.84	0.2154	nonDE
105043444	XM_010920989	LOC105043444	uncharacterized protein C119.09c-like	protein_coding	XP_010919291.1	.	44	92	112	184	306423649498701	662399803929658	815465893139019	114503284750751	-1557	1857	2731	0.06732	nonDE
105043452	XM_010920998	LOC105043452	bifunctional fucokinase/fucose pyrophosphorylase	protein_coding	XP_010919300.1	.	347	452	208	287	241656832672839	325439903669789	151443665868675	178600232192748	0.3482	0.6503	4427	0.3683	nonDE
105043461	XM_010921015,XM_010921016,XM_010921017	LOC105043461	26S proteasome regulatory subunit RPN13, transcript variant X3	protein_coding	XP_010919317.1		150	167	103	210	104462607783648	120239964408971	74993738386892	130683096726401	-0.2594	0.3204	3402	0.6217	nonDE
105043466	XM_010921025	LOC105043466	guanylate-binding protein 5	protein_coding	XP_010919327.1	.	469	594	477	455	326619753670207	427679873406757	347301099131529	283146709573869	-0.1583	0.2871	5099	0.6558	nonDE
105043470	XM_010921026,XM_010921027,XM_010921028	LOC105043470	ATPase family AAA domain-containing protein 1-B, transcript variant X1	protein_coding	XP_010919328.1		160	100	64	85	111426781635891	719999786880063	465980510365154	528955391511623	0.4325	0.478	2745	0.4825	nonDE
105043472	XM_010921031,XM_010921032,XM_010921033	LOC105043472	serine/threonine-protein kinase sid1, transcript variant X2	protein_coding	XP_010919333.1		590	699	582	519	41088625728235	503279851029164	423751026613312	322973939052391	-0.1124	0.1989	5359	0.7495	nonDE
105043482	XM_010921043,XM_029264099	LOC105043482	heat shock 70 kDa protein, mitochondrial, transcript variant X2	protein_coding	XP_010919345.1		1180	899	228	222	821772514564699	647279808405177	166005556817586	138150702253624	1856	4352	5057	0.00385	upReg
105043483	XM_010921045	LOC105043483	methionine gamma-lyase	protein_coding	XP_010919347.1	.	209	111	85	106	145551233511883	79919976343687	61888036532872	659638488238023	0.3438	0.38	3.06	0.5646	nonDE
105043485	XM_010921048	LOC105043485	pyridoxal reductase, chloroplastic	protein_coding	XP_010919350.2	.	342	257	110	195	238174745746718	185039945228176	800904002190108	121348589817372	0.6608	1204	3.85	0.1647	nonDE
105043492	XM_010921051,XM_010921052,XM_010921053,XM_010921056	LOC105043492	sphingoid long-chain bases kinase 1, transcript variant X4	protein_coding	XP_010919353.1		158	215	151	274	110033946865443	154799954179214	109942276664279	170510326204923	-0.4954	0.7647	3744	0.3148	nonDE
105043493	XM_019850122,XM_019850123,XM_019850124,XM_029264100	LOC105043493	trihelix transcription factor GTL1, transcript variant X1	protein_coding	XP_019705681.1		84	99	236	129	58499060358843	712799789011263	171830313197151	802767594176463	-1257	1637	3129	0.09018	nonDE
105043503	XM_010921068,XM_019850209	LOC105043503	kinesin-like protein KIN-7K, chloroplastic, transcript variant X1	protein_coding	XP_010919370.1		65	112	154	80	452671300395809	806399761305671	112126560306615	497840368481527	-0.6896	0.6798	2756	0.3525	nonDE
105043505	XM_010921075,XM_010921076	LOC105043505	SH3 domain-containing protein 2, transcript variant X2	protein_coding	XP_010919377.1		135	153	222	213	940163470052834	11015996739265	161636989532913	132549998108207	-0.9341	2	3614	0.0563	nonDE
105043506	XM_010921079,XM_010921087,XM_029265148	LOC105043506	homeobox-DDT domain protein RLT2, transcript variant X1	protein_coding	XP_010919381.1		370	427	380	279	257674432532999	307439908997787	27667592802931	173621828507933	-0.04244	0.0558	4636	0.9266	nonDE
105043513	XM_010921083,XM_010921085	LOC105043513	uncharacterized LOC105043513, transcript variant X2	protein_coding	XP_010919385.1		188	107	58	122	130926468422172	770399771961667	422294837518421	759206561934329	0.3791	0.3749	2922	0.5699	nonDE
105043514	XM_010921088,XM_010921089	LOC105043514	zinc finger CCCH domain-containing protein 19, transcript variant X1	protein_coding	XP_010919390.1		170	198	142	29	118390955488135	142559957802253	103389425737269	180467133574554	1348	1214	2915	0.1621	nonDE
105043517	XM_010921093,XM_010921094,XM_010921095,XM_029264103	LOC105043517	probable serine protease EDA2, transcript variant X2	protein_coding	XP_010919395.1		299	279	304	255	208228798182072	200879940539538	221340742423448	158686617453487	-0.2773	0.5142	4294	0.4546	nonDE
105043518	XM_010921102,XR_831709	LOC105043518	dnaJ homolog subfamily B member 13, transcript variant X2	protein_coding	XP_010919404.1	.	178	194	93	80	123962294569929	139679958654732	677127929124364	497840368481527	0.7797	1272	3134	0.1503	nonDE
105043519	XM_010921096	LOC105043519	NAD(P)H-quinone oxidoreductase subunit M, chloroplastic	protein_coding	XP_010919398.1	.	778	639	157	298	541812725704522	46007986381636	114310843948952	185445537259369	1351	2943	4755	0.01775	upReg
105043522	XM_010921099,XM_010921101,XM_029264107,XM_029264108	LOC105043522	kinesin-like protein KIN-7F, transcript variant X3	protein_coding	XP_010919401.1		175	265	312	216	121873042414256	190799943523217	227165498803013	134416899490012	-0.5988	0.9377	4032	0.2456	nonDE
105043523	XM_029264109	LOC105043523	CDPK-related kinase 3-like	protein_coding	XP_029119942.1	.	101	155	104	125	703381559076564	11159996696641	757218329343375	777875575752386	-0.2186	0.2515	3.05	0.6923	nonDE
105043578	XM_019849701,XM_019849702,XM_019849703,XM_029264110	LOC105043578	endonuclease MutS2, transcript variant X4	protein_coding	XP_019705260.1		373	235	125	123	259763684688672	169199949916815	910118184306941	765429566540348	0.9251	1.7	3.73	0.08273	nonDE
105043580	XM_010921152,XM_019850203,XM_019850204,XM_029264111,XR_002164577,XR_003800657,XR_003800658,XR_003800659	LOC105043580	AP-2 complex subunit alpha-2, transcript variant X5	protein_coding	XP_010919454.2		94	95	176	201	654632342110862	68399979753606	128144640350417	125082392580984	-1.33	2562	3208	0.02752	downReg
105043583	XM_010921157	LOC105043583	elongation factor G-2, chloroplastic	protein_coding	XP_010919459.1	.	4671	5456	1156	1968	32529656063828	392831883721762	841677296847059	122468730646456	1412	2944	7574	0.01775	upReg
105043585	XM_010921160	LOC105043585	hsp70-Hsp90 organizing protein	protein_coding	XP_010919462.1	.	212	285	62	116	147640485667556	205199939260818	451418619416243	721868534298214	1154	1749	3323	0.07674	nonDE
105043586	XM_010921161,XM_010921164,XM_010921165,XM_019849960,XM_029264112,XM_029264113	LOC105043586	tubulin-folding cofactor D, transcript variant X4	protein_coding	XP_010919463.1		84	99	157	115	58499060358843	712799789011263	114310843948952	715645529692195	-0.8822	1301	2941	0.1435	nonDE
105043587	XM_010921167,XM_019849961	LOC105043587	methionine aminopeptidase 1A, transcript variant X1	protein_coding	XP_010919469.1		145	129	127	94	100980520857527	928799725075281	924680075255852	584962432965794	0.008229	0.008106	3083	0.9911	nonDE
105043590	XM_010921170,XM_029264114	LOC105043590	thylakoid lumenal protein TL20.3, chloroplastic, transcript variant X1	protein_coding	XP_010919472.1		285	240	107	22	198478954788932	172799948851215	779061165766742	13690610133242	2344	1899	2.97	0.06352	nonDE
105043591	XM_010921172	LOC105043591	U1 small nuclear ribonucleoprotein 70 kDa	protein_coding	XP_010919474.1	.	117	121	97	90	814808340712456	871199742124876	706251711022187	560070414541718	0.01811	0.01765	2871	0.9787	nonDE
105043622	XM_010921233,XM_010921239,XM_010921246,XM_010921260,XM_010921268,XM_019852977	LOC105043622	callose synthase 12, transcript variant X6	protein_coding	XP_010919535.1		351	420	437	440	244442502213737	302399910489627	318177317233707	27381220266484	-0.5305	1329	4826	0.1386	nonDE
105043628	XM_010921240,XM_010921241,XR_831724,XR_831725,XR_831726,XR_831728,XR_831729	LOC105043628	luc7-like protein 3, transcript variant X2	protein_coding	XP_010919542.1		195	210	124	204	135801390118743	151199955244813	902837238832486	126949293962789	-0.006698	0.007625	3635	0.9917	nonDE
105043631	XM_010921243,XM_010921244,XM_010921245,XM_010921247	LOC105043631	ATP-dependent zinc metalloprotease FTSH 2, chloroplastic, transcript variant X3	protein_coding	XP_010919545.1		10800	10224	3265	4634	752130776042267	736127782106176	237722869740973	288374033442925	1098	2379	8786	0.0349	upReg
105043635	XM_010921256	LOC105043635	putative glucuronosyltransferase PGSIP8	protein_coding	XP_010919558.1	.	335	326	545	922	233299824050148	234719930522901	396811528357826	57376102467496	-1443	3403	5064	0.01031	downReg
105043644	XM_010921270,XM_029264134	LOC105043644	structural maintenance of chromosomes protein 6B, transcript variant X1	protein_coding	XP_010919572.1		176	197	224	309	122569459799481	141839958015372	163093178627804	19229084232599	-0.8442	1915	3937	0.06218	nonDE
105043647	XM_010921274,XM_010921275,XM_010921276,XM_010921277,XM_010921278,XM_010921279	LOC105043647	uncharacterized LOC105043647, transcript variant X1	protein_coding	XP_010919576.1		141	97	70	176	981948513166293	698399793273661	509666183211887	109524881065936	-0.3019	0.2926	2982	0.6508	nonDE
105043649	XM_019849956	LOC105043649	CCR4-NOT transcription complex subunit 1	protein_coding	XP_019705515.1	.	1899	1808	1696	2083	132249661454099	130175961467915	123484835246766	129625185943378	-0.3583	0.8846	7.01	0.2666	nonDE
105043653	XM_010921285	LOC105043653	T-complex protein 1 subunit alpha	protein_coding	XP_010919587.1	.	366	223	227	183	254888762992102	160559952474254	165277462270141	113880984290149	0.1602	0.205	4061	0.7424	nonDE
105043663	XM_010921295,XM_010921296,XM_010921297,XM_010921298,XM_010921299,XM_029264137	LOC105043663	uncharacterized LOC105043663, transcript variant X3	protein_coding	XP_010919597.1		1333	1196	788	931	92832437450402	861119745108555	573738503387096	579361728820377	0.2197	0.5382	6167	0.4371	nonDE
105043668	XM_010921309,XM_010921310,XM_019850035	LOC105043668	coatomer subunit alpha-1, transcript variant X2	protein_coding	XP_010919611.1		984	1257	1351	1378	685274707060732	905039732108239	983655733598942	85753003470943	-0.6347	1677	6411	0.08578	nonDE
105043671	XM_010921313	LOC105043671	tyrosine--tRNA ligase 1, cytoplasmic	protein_coding	XP_010919615.1	.	497	410	341	465	346119440456488	295199912620826	248280240678934	289369714179888	-0.1613	0.3094	4873	0.6336	nonDE
105043675	XM_010921317,XM_010921318,XM_010921319,XM_010921320,XM_010921322,XM_010921323,XM_010921324,XM_019850236	LOC105043675	protein RFT1 homolog, transcript variant X7	protein_coding	XP_010919619.1		163	103	40	112	113516033791564	741599780486465	291237818978221	696976515874138	0.5263	0.4768	2694	0.4836	nonDE
105043676	XM_010921325	LOC105043676	60S ribosomal protein L15	protein_coding	XP_010919627.1	.	288	275	95	138	200568206944605	197999941392017	691689820073275	858774635630634	0.9405	1948	3636	0.05916	nonDE
105043678	XM_010921328,XM_010921329,XM_019849687,XM_019849688,XM_029264140,XM_029264141	LOC105043678	probable helicase CHR10, transcript variant X4	protein_coding	XP_010919630.1		254	136	126	132	176890015846978	979199710156886	917399129781397	82143660799452	0.1953	0.2231	3423	0.7228	nonDE
105043680	XM_010921333,XR_002164503,XR_831734,XR_831736	LOC105043680	E3 ubiquitin-protein ligase BRE1-like 1, transcript variant X1	protein_coding	XP_010919635.1	.	224	225	191	238	155997494290248	161999952048014	139066058562101	148107509623254	-0.268	0.4927	3.92	0.4703	nonDE
105043682	XM_010921337,XM_010921339,XR_831737	LOC105043682	autophagy-related protein 3, transcript variant X1	protein_coding	XP_010919639.1		339	219	153	189	236085493591045	157679953326734	11139846575917	117614787053761	0.3414	0.5607	3897	0.4219	nonDE
105043685	XM_010921343,XM_010921344	LOC105043685	chaperone protein dnaJ A6, transcript variant X2	protein_coding	XP_010919645.1		231	307	112	337	160872415986818	221039934572179	815465893139019	209715255222843	0.08827	0.07499	3977	0.9025	nonDE
105043687	XM_010921350,XM_010921357	LOC105043687	3-deoxy-manno-octulosonate cytidylyltransferase, mitochondrial, transcript variant X1	protein_coding	XP_010919652.1		194	215	107	195	135104972733518	154799954179214	779061165766742	121348589817372	0.1382	0.1703	3572	0.7831	nonDE
105043688	XM_010921347	LOC105043688	quinone oxidoreductase 1	protein_coding	XP_010919649.1	.	260	248	75	98	181068520158324	178559947146256	546070910584165	609854451389871	1212	2262	3354	0.04066	upReg
105043712	XM_010921372,XM_010921373,XM_019849680,XM_019849681	LOC105043712	uncharacterized LOC105043712, transcript variant X2	protein_coding	XP_010919674.1		102	104	47	91	710345732928808	748799778355266	34220443729941	566293419147737	0.2527	0.2271	2512	0.7194	nonDE
105043713	XM_010921374,XM_010921376,XM_029264143	LOC105043713	protein AATF, transcript variant X2	protein_coding	XP_010919676.1		106	114	66	114	738202428337781	820799757043272	480542401314065	709422525086176	-0.02945	0.02618	2761	0.97	nonDE
105043717	XM_010921380	LOC105043717	uncharacterized protein At3g06530	protein_coding	XP_010919682.1	.	406	325	276	242	282745458401074	233999930736021	200954095094973	150596711465662	0.1597	0.2661	4405	0.6771	nonDE
105043721	XM_010921386	LOC105043721	cationic amino acid transporter 9, chloroplastic	protein_coding	XP_010919688.1	.	221	217	57	126	153908242134575	156239953752974	415013892043965	784098580358405	0.9812	1.49	3.24	0.1103	nonDE
105043731	XM_010921403,XM_010921405,XM_010921406,XM_010921407	LOC105043731	ranBP2-type zinc finger protein At1g67325, transcript variant X1	protein_coding	XP_010919705.1		226	160	81	275	157390329060697	11519996590081	589756583430898	171132626665525	-0.03105	0.02285	3545	0.9726	nonDE
105043733	XM_010921409	LOC105043733	ethylene-responsive transcription factor ERF105	protein_coding	XP_010919711.1	.	199	132	328	679	13858705965964	950399718681683	238815011562141	422542012748696	-1885	3165	4258	0.01384	downReg
105043743	XM_010921423	LOC105043743	serine/threonine-protein kinase D6PK	protein_coding	XP_010919725.1	.	146	238	166	300	101676938242751	171359949277455	120863694875962	186690138180573	-0.6146	0.9175	3819	0.2542	nonDE
105043748	XM_010921433	LOC105043748	phospholipase A1-Ibeta2, chloroplastic	protein_coding	XP_010919735.1	.	51	61	306	270	355172866464404	439199869996838	222796931518339	168021124362515	-2704	3192	3136	0.01323	downReg
105043749	XM_010921434	LOC105043749	transcription factor KUA1	protein_coding	XP_010919736.1	.	121	91	142	61	842665036121429	655199806060857	103389425737269	379603280967164	-0.1024	0.07623	2778	0.9009	nonDE
105043753	XM_010921439	LOC105043753	GTP-binding protein YPTM2	protein_coding	XP_010919741.1	.	221	110	295	260	153908242134575	791999765568069	214787891496438	161798119756496	-1149	2029	3846	0.05459	nonDE
105043755	XM_010921441	LOC105043755	monooxygenase 2	protein_coding	XP_010919743.1	.	313	197	137	306	217978641575213	141839958015372	997489530000408	190423940944184	-0.07257	0.07102	3964	0.9078	nonDE
105043758	XM_010921444,XM_010921445,XM_010921446,XM_019849793,XM_019849794,XM_029264155,XM_029264156,XM_029264157	LOC105043758	uncharacterized LOC105043758, transcript variant X4	protein_coding	XP_010919746.1		204	151	103	144	142069146585762	10871996781889	74993738386892	896112663266749	0.1784	0.2338	3.34	0.7134	nonDE
105043760	XM_010921449,XM_029264159	LOC105043760	protein mago nashi homolog, transcript variant X2	protein_coding	XP_010919751.1		323	233	46	54	224942815427456	167759950343055	334923491824954	336042248725031	2107	2046	3022	0.05358	nonDE
105043765	XM_010921456	LOC105043765	nucleoside diphosphate kinase B	protein_coding	XP_010919758.1	.	545	375	177	292	379547474947255	269999920080024	128872734897863	181711734495757	0.6439	1277	4471	0.1493	nonDE
105043771	XM_010921464,XM_019850029	LOC105043771	pentatricopeptide repeat-containing protein At1g02150, transcript variant X1	protein_coding	XP_010919766.1		144	181	24	51	100284103472302	130319961425291	174742691386933	317373234906974	1783	0.9404	2389	0.2454	nonDE
105043777	XM_010921469	LOC105043777	protein ORANGE, chloroplastic	protein_coding	XP_010919771.1	.	267	197	122	137	185943441854894	141839958015372	888275347883575	852551631024615	0.4881	0.8767	3576	0.2694	nonDE
105043778	XM_010921470	LOC105043778	RNA-binding KH domain-containing protein PEPPER	protein_coding	XP_010919772.1	.	310	171	150	410	21588938941954	123119963556491	109214182116833	255143188846783	-0.4658	0.4997	4047	0.4646	nonDE
105043786	XM_010921482,XM_010921484,XM_029264171,XM_029264172	LOC105043786	(S)-ureidoglycine aminohydrolase, transcript variant X4	protein_coding	XP_010919784.1		273	205	128	79	19012194616624	147599956310413	931961020730308	491617363875508	0.9294	1471	3418	0.1133	nonDE
105043788	XM_010921487	LOC105043788	phospho-2-dehydro-3-deoxyheptonate aldolase 2, chloroplastic	protein_coding	XP_010919789.2	.	236	168	147	105	16435450291294	120959964195851	107029898474496	653415483632004	0.3643	0.5053	3446	0.4614	nonDE
105043791	XM_010921494	LOC105043791	serine/threonine-protein kinase SAPK3	protein_coding	XP_010919796.1	.	230	104	0	37	160175998601594	748799778355266	0	230251170422706	4836	0.544	0.8398	0.433	nonDE
105043793	XM_010921495,XM_010921496,XM_010921500,XM_019849980,XM_029264175	LOC105043793	heterogeneous nuclear ribonucleoprotein Q, transcript variant X3	protein_coding	XP_010919797.1		709	776	627	272	493759926124044	558719834618929	456515281248362	169265725283719	0.5229	0.6863	5257	0.349	nonDE
105043795	XM_010921505,XM_029264176	LOC105043795	calcineurin B-like protein 1, transcript variant X1	protein_coding	XP_010919807.1		113	104	131	176	786951645303483	748799778355266	953803857153675	109524881065936	-0.8293	1537	3153	0.1022	nonDE
105043803	XM_010921517,XM_029264181	LOC105043803	uncharacterized LOC105043803, transcript variant X2	protein_coding	XP_010919819.1		1087	934	848	1193	757005697738837	672479800945979	617424176233829	742404449498077	-0.3359	0.8448	6.12	0.2817	nonDE
105043814	XM_010921532	LOC105043814	regulator of nonsense transcripts 1 homolog	protein_coding	XP_010919834.1	.	883	718	580	680	614936551153076	516959846979885	422294837518421	423164313209298	0.002781	0.004685	5.61	0.9942	nonDE
105043816	XM_029265025	LOC105043816	potassium channel KAT3	protein_coding	XP_029120858.1	.	85	168	345	276	591954777440673	120959964195851	251192618868716	171754927126127	-1.71	2751	3733	0.02178	downReg
105043822	XM_010921539	LOC105043822	dynamin-related protein 1E	protein_coding	XP_010919841.1	.	326	301	243	252	227032067583129	216719935850899	176926975029269	156819716071681	0.002858	0.00409	4267	0.9951	nonDE
105043828	XM_019850128	LOC105043828	5'-3' exoribonuclease 3	protein_coding	XP_019705687.1	.	310	249	467	296	21588938941954	179279946933136	340020153657073	184200936338165	-0.7449	1366	4474	0.1308	nonDE
105043831	XM_010921548,XM_010921549,XM_019850272,XM_019850273	LOC105043831	two-component response regulator-like APRR2, transcript variant X2	protein_coding	XP_010919850.1		56	84	193	115	38999373572562	604799820979253	140522247656992	715645529692195	-1446	1.69	2811	0.08397	nonDE
105043840	XM_010921557,XM_010921558,XM_010921559	LOC105043840	ribose-phosphate pyrophosphokinase 1, transcript variant X1	protein_coding	XP_010919859.1		140	138	26	0	97498433931405	993599705894487	189304582335844	0	4.92	0.798	0.6376	0.2992	nonDE
105043843	XM_010921561	LOC105043843	pyruvate kinase isozyme G, chloroplastic	protein_coding	XP_010919863.2	.	442	459	217	136	30781648426915	330479902177949	157996516795685	846328626418596	1065	2.14	4266	0.04675	upReg
105043852	XM_010921574	LOC105043852	plant intracellular Ras-group-related LRR protein 5	protein_coding	XP_010919876.2	.	118	111	43	40	821772514564699	79919976343687	313080655401588	248920184240764	1138	0.7386	2262	0.3253	nonDE
105043854	XM_010921577,XM_010921578,XM_010921579,XM_029264190	LOC105043854	3-hydroxyisobutyryl-CoA hydrolase 1, transcript variant X4	protein_coding	XP_010919879.1		316	275	202	221	220067893730886	197999941392017	147075098584002	137528401793022	0.142	0.2393	4.11	0.7075	nonDE
105043857	XM_010921588	LOC105043857	calcyclin-binding protein	protein_coding	XP_010919890.1	.	265	127	52	83	184550607084445	91439972933768	378609164671688	516509382299584	1106	1145	2.93	0.1808	nonDE
105043860	XM_010921590,XM_010921593,XM_019850031,XM_019850032,XM_019850033	LOC105043860	uncharacterized LOC105043860, transcript variant X1	protein_coding	XP_010919892.1		316	194	165	125	220067893730886	139679958654732	120135600328516	777875575752386	0.4656	0.6873	3707	0.3487	nonDE
105043884	XM_019850134,XM_019850135,XM_019850138,XM_019850140,XM_029264170,XR_002164554,XR_002164555,XR_003800673	LOC105043884	uncharacterized LOC105043884, transcript variant X1	protein_coding	XP_019705693.1		180	146	179	185	125355129340378	105119968884489	130328923992754	115125585211353	-0.5014	0.9796	3572	0.2314	nonDE
105043907	XM_010921632	LOC105043907	uncharacterized protein At2g38710	protein_coding	XP_010919934.1	.	194	124	47	46	135104972733518	892799735731278	34220443729941	286258211876878	1415	1053	2562	0.2072	nonDE
105043908	XM_010921633	LOC105043908	uncharacterized sugar kinase slr0537	protein_coding	XP_010919935.1	.	362	318	64	78	252103093451204	22895993222786	465980510365154	485394359269489	1911	3221	3424	0.01273	upReg
105043913	XM_010921640	LOC105043913	uncharacterized LOC105043913	protein_coding	XP_010919942.1	.	162	94	185	337	11281961640634	676799799667259	134697491277427	209715255222843	-1357	2243	3604	0.04159	downReg
105043916	XM_010921641,XM_010921642,XM_010921643,XM_010921644,XM_029264196	LOC105043916	uncharacterized LOC105043916, transcript variant X1	protein_coding	XP_010919943.1		70	105	72	148	487492169657025	755999776224066	524228074160798	921004681690825	-0.6534	0.7259	2707	0.331	nonDE
105043927	XM_010921656	LOC105043927	transcription factor MYC2	protein_coding	XP_010919958.1	.	174	166	245	217	121176625029032	11951996462209	178383164124161	135039199950614	-0.7723	1674	3776	0.086	nonDE
105043931	XM_010921664,XM_029264995	LOC105043931	ubiquitin-conjugating enzyme E2 36, transcript variant X1	protein_coding	XP_010919966.1		227	166	115	215	158086746445921	11951996462209	837308729562386	13379459902941	-0.0513	0.05533	3597	0.9269	nonDE
105043932	XM_010921660	LOC105043932	cinnamoyl-CoA reductase-like SNL6	protein_coding	XP_010919962.1	.	146	223	67	130	101676938242751	160559952474254	487823346788521	808990598782482	0.5694	0.6933	3169	0.3465	nonDE
105043948	XM_010921677	LOC105043948	probable xyloglucan endotransglucosylase/hydrolase protein 30	protein_coding	XP_010919979.1	.	65	104	186	567	452671300395809	748799778355266	135425585824873	352844361161282	-2354	2329	3502	0.03699	downReg
105043950	XM_029264200,XR_003800706,XR_003800707	LOC105043950	lysine-specific demethylase JMJ706, transcript variant X2	protein_coding	XP_029120033.1	.	109	106	169	166	75909494989451	763199774092867	123047978518298	103301876459917	-0.9733	1887	3217	0.06447	nonDE
105043955	XM_010921686	LOC105043955	inactive poly [ADP-ribose] polymerase RCD1	protein_coding	XP_010919988.1	.	314	267	409	353	218675058960437	192239943096977	297790669905231	219672062592474	-0.724	1759	4519	0.07611	nonDE
105043956	XM_010921687,XM_010921688,XM_010921689,XM_029264203	LOC105043956	TOM1-like protein 1, transcript variant X1	protein_coding	XP_010919989.1		420	378	255	389	292495301794215	272159919440664	185664109598616	242074879174143	-0.008446	0.01195	4614	0.9864	nonDE
105043957	NM_001303609	GPAT	glycerol-3-phosphate acyltransferase, chloroplastic	protein_coding	NP_001290538.1	.	476	482	245	338	331494675366777	34703989727619	178383164124161	210337555683445	0.3881	0.9018	4682	0.2602	nonDE
105043962	XM_010921712,XM_010921713,XM_010921714,XM_010921715,XM_010921717,XM_010921718,XM_019850119,XM_019850120,XM_019850121	LOC105043962	bZIP transcription factor 16, transcript variant X1	protein_coding	XP_010920014.1		143	197	223	359	995876860870779	141839958015372	162365084080358	223405865356085	-1106	2185	3915	0.04477	downReg
105043966	XM_010921723	LOC105043966	6-phosphogluconate dehydrogenase, decarboxylating 1	protein_coding	XP_010920025.1	.	190	304	379	277	132319303192621	218879935211539	275947833481865	172377227586729	-0.7641	1311	4271	0.1421	nonDE
105043967	XM_010921724	LOC105043967	26S proteasome non-ATPase regulatory subunit 13 homolog B	protein_coding	XP_010920026.1	.	171	207	154	148	119087372873359	149039955884173	112126560306615	921004681690825	-0.01888	0.02239	3545	0.973	nonDE
105043970	XM_010921727	LOC105043970	DEAD-box ATP-dependent RNA helicase 5	protein_coding	XP_010920029.2	.	208	221	325	281	144854816126659	159119952900494	236630727919805	174866429429136	-0.8269	1897	4138	0.06369	nonDE
105043976	XM_010921730	LOC105043976	phosphoribulokinase, chloroplastic	protein_coding	XP_010920032.1	.	2682	2256	1028	1265	186779142717163	162431951920142	748481194774029	787210082661415	0.7691	2.17	6854	0.04564	upReg
105043980	XM_010921738	LOC105043980	CSC1-like protein At1g32090	protein_coding	XP_010920040.2	.	189	140	109	60	131622885807397	100799970163209	793623056715653	373380276361145	0.7139	0.8955	2992	0.2633	nonDE
105043981	XM_019850259	LOC105043981	transmembrane 9 superfamily member 2	protein_coding	XP_019705818.1	.	157	205	136	65	109337529480218	147599956310413	990208584525952	404495299391241	0.6382	0.7503	3171	0.32	nonDE
105043985	gene-LOC105043985	LOC105043985	.	pseudogene	.	.	363	500	666	870	252799510836429	359999893440032	484910968598738	541401400723661	-1.18	2998	5298	0.01674	downReg
105043987	XM_010921747,XM_010921748,XM_019850248,XM_019850249,XM_029264209	LOC105043987	ruBisCO large subunit-binding protein subunit beta, chloroplastic, transcript variant X3	protein_coding	XP_010920049.1		2977	2594	431	440	20732345558128	186767944716688	313808749949033	27381220266484	2334	5385	6248	0.001432	upReg
105043991	XM_019850186	LOC105043991	protein NRT1/ PTR FAMILY 8.3	protein_coding	XP_019705745.1	.	538	723	455	454	374672553250685	520559845914286	331283019087727	282524409113267	0.1177	0.1967	5201	0.752	nonDE
105043992	XM_010921753,XM_019849678,XR_831815	LOC105043992	protein NRT1/ PTR FAMILY 8.3, transcript variant X2	protein_coding	XP_010920055.1		176	265	154	190	122569459799481	190799943523217	112126560306615	118237087514363	-0.01095	0.01203	3734	0.9864	nonDE
105043997	XM_010921760,XM_019850098,XM_029264211,XM_029264212,XM_029264213	LOC105043997	protein TOPLESS-RELATED PROTEIN 2, transcript variant X5	protein_coding	XP_010920062.1		1318	1727	729	691	917878113725655	124343963194187	530780925087808	430009618275919	0.7519	1937	6159	0.05994	nonDE
105044003	XM_010921771,XM_019850126	LOC105044003	uncharacterized LOC105044003, transcript variant X1	protein_coding	XP_010920073.2		487	499	249	254	339155266604244	359279893653151	181295542313943	158064316992885	0.6326	1.65	4606	0.08858	nonDE
105044009	XM_010921775	LOC105044009	alpha-glucosidase 2	protein_coding	XP_010920077.1	.	184	150	98	136	128140798881275	107999968032009	713532656496642	846328626418596	0.1746	0.2302	3263	0.7172	nonDE
105044012	XM_010921781,XR_003800719	LOC105044012	RNA-binding protein 39, transcript variant X1	protein_coding	XP_010920083.1	.	330	214	291	316	229817737124026	154079954392333	211875513306656	196646945550203	-0.5237	1.08	4295	0.1987	nonDE
105044019	XM_010921790,XM_029264220	LOC105044019	probable 26S proteasome non-ATPase regulatory subunit 3, transcript variant X2	protein_coding	XP_010920092.1		227	215	129	107	158086746445921	154799954179214	939241966204764	665861492844043	0.5852	1057	3.48	0.2061	nonDE
105044022	XM_010921794	LOC105044022	uncharacterized LOC105044022	protein_coding	XP_010920096.1	.	310	291	145	210	21588938941954	209519937982098	105573709379605	130683096726401	0.4355	0.8817	3986	0.2675	nonDE
105044027	XM_010921800	LOC105044027	heavy metal-associated isoprenylated plant protein 27	protein_coding	XP_010920102.1	.	104	129	163	278	724274080633294	928799725075281	118679411233625	172999528047331	-1231	2196	3443	0.04411	downReg
105044036	XM_010921811	LOC105044036	glycerate dehydrogenase	protein_coding	XP_010920113.1	.	1479	1202	379	773	103000131274677	865439743829836	275947833481865	481038256045276	0.9507	1989	5875	0.05717	nonDE
105044042	XM_010921821,XM_010921822,XM_029264224,XM_029264225,XM_029264226,XM_029264227,XM_029264228	LOC105044042	E3 ubiquitin-protein ligase UPL3, transcript variant X2	protein_coding	XP_010920123.1		1981	1872	2035	1881	137960284012938	134783960103948	14816724040517	117054716639219	-0.3666	0.8526	7067	0.2788	nonDE
105044043	XM_010921826,XM_019853112,XM_019853115,XM_029264962,XM_029264966	LOC105044043	serine/threonine-protein kinase EDR1, transcript variant X1	protein_coding	XP_010920128.1		698	935	1218	304	486099334886576	673199800732859	886819158788684	18917934002298	0.08426	0.05274	5598	0.9307	nonDE
105044049	XM_010921828	LOC105044049	synaptotagmin-2	protein_coding	XP_010920130.1	.	1402	1504	1602	1443	976377174084498	108287967946761	116640746500778	897979564648555	-0.4091	1004	6681	0.2229	nonDE
105044050	XM_010921829	LOC105044050	T-complex protein 1 subunit zeta 1	protein_coding	XP_010920131.1	.	783	779	384	500	545294812630643	560879833979569	279588306219092	311150230300954	0.4908	1377	5337	0.129	nonDE
105044056	XM_010921838,XM_010921839,XM_010921840,XR_831831	LOC105044056	DEAD-box ATP-dependent RNA helicase 28, transcript variant X2	protein_coding	XP_010920140.1		291	232	198	195	202657459100277	167039950556175	14416272039422	121348589817372	0.06797	0.09634	3967	0.8754	nonDE
105044059	XM_010921847,XM_010921848,XM_029264235,XM_029264236	LOC105044059	26S proteasome non-ATPase regulatory subunit 4 homolog, transcript variant X3	protein_coding	XP_010920149.1		123	180	128	279	856593383825915	129599961638411	931961020730308	173621828507933	-0.7055	0.9776	3538	0.2319	nonDE
105044080	XM_019849839	LOC105044080	ferredoxin--NADP reductase, leaf isozyme, chloroplastic	protein_coding	XP_019705398.1	.	3842	2609	1557	2442	267563559403184	187847944397008	113364321037273	151965772478986	0.3638	0.6397	7423	0.3732	nonDE
105044086	XM_010921883	LOC105044086	translocase of chloroplast 120, chloroplastic	protein_coding	XP_010920185.1	.	692	574	261	381	48192083057523	413279877669156	190032676883289	237096475489327	0.6519	1672	4946	0.08613	nonDE
105044092	XM_010921889	LOC105044092	uncharacterized LOC105044092	protein_coding	XP_010920191.1	.	372	297	275	240	259067267303447	213839936703379	200226000547527	149352110544458	0.04091	0.05742	4337	0.9244	nonDE
105044097	XM_029264199	LOC105044097	dnaJ homolog subfamily C GRV2	protein_coding	XP_029120032.1	.	1464	1329	1053	1219	101955505196841	956879716763604	766683558460168	758584261473727	-0.03963	0.07304	6.44	0.9049	nonDE
105044119	XM_019849849,XM_029264243	LOC105044119	translocon-associated protein subunit alpha, transcript variant X2	protein_coding	XP_019705408.1		316	313	224	137	220067893730886	22535993329346	163093178627804	852551631024615	0.5193	0.8614	4022	0.2751	nonDE
105044125	XM_010921919	LOC105044125	primary amine oxidase	protein_coding	XP_010920221.1	.	104	105	32	110	724274080633294	755999776224066	232990255182577	6845305066621	0.296	0.2131	2453	0.7331	nonDE
105044130	XM_010921925	LOC105044130	uncharacterized LOC105044130	protein_coding	XP_010920227.1	.	107	174	231	208	745166602190024	125279962917131	168189840459923	129438495805197	-1026	1835	3582	0.06933	nonDE
105044131	XM_010921926	LOC105044131	60S ribosomal protein L8-1	protein_coding	XP_010920228.1	.	290	335	116	206	201961041715053	241199928604821	844589675036842	128193894883993	0.6515	1221	3925	0.1606	nonDE
105044135	XM_010921930,XM_010921931,XM_029264246	LOC105044135	tRNA-dihydrouridine(47) synthase [NAD(P)(+)]-like, transcript variant X1	protein_coding	XP_010920232.1		282	272	86	120	196389702633259	195839942031377	626161310803176	746760552722291	1.09	2193	3538	0.0442	upReg
105044141	XM_010921939,XM_010921940,XM_019850114,XM_019850115,XM_019850116	LOC105044141	calcium-dependent protein kinase 18, transcript variant X4	protein_coding	XP_010920241.1		136	187	642	557	947127643905077	134639960146572	467436699460045	346621356555263	-2245	4444	4417	0.00344	downReg
105044150	XM_010921954,XM_029264248,XM_029264249,XM_029264250,XM_029264251,XM_029264252	LOC105044150	protein ANTHESIS POMOTING FACTOR 1, transcript variant X6	protein_coding	XP_010920256.1		176	131	128	43	122569459799481	943199720812883	931961020730308	267589198058821	0.7727	0.7596	2881	0.3167	nonDE
105044155	XM_010921963,XM_019850245	LOC105044155	putative HVA22-like protein g, transcript variant X2	protein_coding	XP_010920265.1		56	53	112	240	38999373572562	381599887046433	815465893139019	149352110544458	-1.94	1.76	2715	0.07611	nonDE
105044162	XM_010921969,XM_010921970,XM_010921971,XM_029264258,XR_003800728	LOC105044162	pentatricopeptide repeat-containing protein MRL1, chloroplastic, transcript variant X3	protein_coding	XP_010920271.1		774	579	483	348	539027056163625	416879876603557	351669666416202	216560560289464	0.377	0.7132	5178	0.3372	nonDE
105044172	XM_010921980,XM_010921981,XM_010921982,XM_010921983,XM_029264265,XR_003800729,XR_003800730	LOC105044172	pre-mRNA-processing factor 39, transcript variant X1	protein_coding	XP_010920282.1		301	298	340	312	209621632952521	214559936490259	247552146131488	194157743707796	-0.4553	1048	4433	0.209	nonDE
105044174	XM_010921986	LOC105044174	DNA-directed RNA polymerase II subunit RPB2	protein_coding	XP_010920288.1	.	1479	1556	1305	1680	103000131274677	112031966838538	950163384416447	104546477381121	-0.3013	0.7275	6694	0.3307	nonDE
105044183	XM_010921994,XR_003800731	LOC105044183	pre-mRNA-processing factor 19, transcript variant X1	protein_coding	XP_010920296.1	.	258	246	209	249	179675685387875	177119947572496	152171760416121	154952814689875	-0.1979	0.3537	4052	0.5882	nonDE
105044189	XM_010922002,XM_029264274,XR_003800733	LOC105044189	peroxisome biogenesis protein 12, transcript variant X1	protein_coding	XP_010920304.1		119	106	80	65	828736688416942	763199774092867	582475637956443	404495299391241	0.3221	0.3475	2644	0.5942	nonDE
105044196	XM_010922009	LOC105044196	protein NRT1/ PTR FAMILY 5.2	protein_coding	XP_010920311.2	.	198	136	49	82	137890642274416	979199710156886	356766328248321	510286377693565	0.9846	1216	2824	0.1618	nonDE
105044197	XM_010922010,XR_831853	LOC105044197	heterogeneous nuclear ribonucleoprotein 1, transcript variant X1	protein_coding	XP_010920312.1	.	290	330	177	345	201961041715053	237599929670421	128872734897863	214693658907659	-0.03332	0.03841	4257	0.9534	nonDE
105044205	XM_010922024,XM_019849934	LOC105044205	DExH-box ATP-dependent RNA helicase DExH1, transcript variant X2	protein_coding	XP_010920326.1		269	265	343	165	187336276625342	190799943523217	249736429773825	102679575999315	-0.1514	0.1548	4124	0.8011	nonDE
105044208	XM_019849935,XM_019849936,XM_019849938,XM_019849939,XM_019849940,XM_019849941,XM_019849942,XM_019849943,XM_019849944,XM_019849945,XM_019849946,XM_019849948,XM_019849949	LOC105044208	protein NPGR2, transcript variant X1	protein_coding	XP_019705494.1		126	141	234	256	877485905382645	101519969950089	170374124102259	159308917914089	-1216	2698	3645	0.02331	downReg
105044211	XM_010922037	LOC105044211	shaggy-related protein kinase eta	protein_coding	XP_010920339.1	.	334	263	356	445	232603406664923	189359943949457	259201658890617	276923704967849	-0.7637	1998	4.57	0.05652	nonDE
105044214	XM_010922036,XM_010922039,XM_019850225,XR_002164581	LOC105044214	WD repeat-containing protein 91 homolog, transcript variant X4	protein_coding	XP_010920338.1		278	188	184	171	193604033092361	135359959933452	133969396729982	106413378762926	0.03444	0.04136	3801	0.9485	nonDE
105044216	XM_010922042	LOC105044216	non-lysosomal glucosylceramidase-like	protein_coding	XP_010920344.1	.	563	508	310	405	392082987881293	365759891735072	225709309708121	252031686543773	0.2508	0.5617	4911	0.421	nonDE
105044219	XM_010922045	LOC105044219	uncharacterized LOC105044219	protein_coding	XP_010920347.1	.	169	164	147	112	11769453810291	11807996504833	107029898474496	696976515874138	0.05373	0.06093	3.34	0.92	nonDE
105044225	XM_010922051	LOC105044225	UDP-glucose:glycoprotein glucosyltransferase	protein_coding	XP_010920353.1	.	820	991	783	658	571062255883943	713519788798143	570098030649868	409473703076056	-0.008711	0.01275	5796	0.9857	nonDE
105044233	XM_019849722	LOC105044233	coatomer subunit zeta-2	protein_coding	XP_019705281.1	.	145	108	124	141	100980520857527	777599769830468	902837238832486	877443649448692	-0.4139	0.6515	3156	0.3677	nonDE
105044241	XM_010922067	LOC105044241	photosystem I reaction center subunit VI, chloroplastic	protein_coding	XP_010920369.1	.	3527	2416	1454	2455	245626411768618	173951948510223	105864947198583	152774763077769	0.2935	0.4694	7341	0.4895	nonDE
105044252	XM_010922076	LOC105044252	aspartate aminotransferase, cytoplasmic	protein_coding	XP_010920378.1	.	307	226	252	266	213800137263867	162719951834894	183479825956279	165531922520108	-0.3095	0.5863	4175	0.4044	nonDE
105044276	XM_010922094	LOC105044276	chorismate synthase 2, chloroplastic	protein_coding	XP_010920396.2	.	480	505	286	414	334280344907674	363599892374432	208235040569428	25763239068919	0.17	0.3202	4.83	0.6219	nonDE
105044278	XM_010922096,XM_010922098	LOC105044278	zinc finger CCCH domain-containing protein 24, transcript variant X1	protein_coding	XP_010920398.1		125	65	72	115	870521731530402	467999861472041	524228074160798	715645529692195	-0.3584	0.3513	2653	0.5906	nonDE
105044281	XM_010922100	LOC105044281	protein disulfide isomerase-like 1-4	protein_coding	XP_010920402.1	.	379	500	186	162	263942189000018	359999893440032	135425585824873	100812674617509	0.9893	2112	4249	0.0489	upReg
105044283	XM_010922103,XM_010922104	LOC105044283	aquaporin PIP2-4, transcript variant X2	protein_coding	XP_010920405.1		474	499	53	94	330101840596328	359279893653151	385890110146143	584962432965794	2399	3772	3683	0.007094	upReg
105044285	XM_010922106	LOC105044285	60S ribosomal protein L12	protein_coding	XP_010920408.1	.	374	287	106	178	260460102073896	206639938834578	771780220292286	11076948198714	0.8966	1791	3876	0.07286	nonDE
105044301	XM_010922142,XM_010922144,XM_010922145,XM_010922146	LOC105044301	protein ENHANCED DISEASE RESISTANCE 2, transcript variant X1	protein_coding	XP_010920444.1		42	115	146	63	292495301794215	827999754912073	106301803927051	392049290179203	-0.7783	0.5757	2505	0.4114	nonDE
105044303	XM_010922154,XM_029264289	LOC105044303	protein GDAP2 homolog, transcript variant X2	protein_coding	XP_010920456.1		317	300	335	302	22076431111611	215999936064019	24391167339426	187934739101776	-0.3778	0.8238	4437	0.2888	nonDE
105044322	XM_010922176	LOC105044322	malate dehydrogenase	protein_coding	XP_010920478.1	.	1197	947	377	712	833611610113512	68183979817542	274491644386974	443077927948559	0.6898	1489	5681	0.1103	nonDE
105044323	XM_010922177	LOC105044323	pre-mRNA-splicing factor SLU7	protein_coding	XP_010920479.1	.	150	192	88	105	104462607783648	138239959080972	640723201752087	653415483632004	0.4705	0.6883	3146	0.3486	nonDE
105044343	XM_010922203,XM_010922204,XM_019850828,XM_019850829	LOC105044343	transcription factor bHLH155, transcript variant X1	protein_coding	XP_010920505.1		104	79	98	128	724274080633294	56879983163525	713532656496642	796544589570443	-0.6453	0.9466	2806	0.2426	nonDE
105044348	XM_010922207	LOC105044348	tropinone reductase homolog At5g06060	protein_coding	XP_010920509.1	.	172	147	59	52	119783790258583	105839968671369	429575782992876	323596239512993	1.22	1412	2705	0.1236	nonDE
105044353	XM_010922211	LOC105044353	protein PLASTID TRANSCRIPTIONALLY ACTIVE 16, chloroplastic	protein_coding	XP_010920513.1	.	229	134	297	325	15947958121637	964799714419285	216244080591329	20224764969562	-1157	2432	4013	0.03287	downReg
105044354	XM_010922212,XM_010922213,XM_019850688	LOC105044354	serine/arginine repetitive matrix protein 1, transcript variant X3	protein_coding	XP_010920514.1		240	238	257	450	167140172453837	171359949277455	187120298693507	280035207270859	-0.8587	1818	4301	0.07071	nonDE
105044361	XM_010922224	LOC105044361	protein TOC75-3, chloroplastic	protein_coding	XP_010920526.1	.	355	399	151	115	247228171754634	287279914965145	109942276664279	715645529692195	1188	2473	3946	0.0309	upReg
105044364	XM_010922228,XM_010922229	LOC105044364	hsp70-binding protein 1, transcript variant X2	protein_coding	XP_010920530.1		491	324	18	26	341940936145142	23327993094914	1310570185402	161798119756496	3817	1224	2699	0.1605	nonDE
105044367	XM_010922232	LOC105044367	probable E3 ubiquitin-protein ligase RHC2A	protein_coding	XP_010920534.1	.	24	48	162	378	167140172453837	34559989770243	11795131668618	235229574107522	-3237	1301	2674	0.1435	nonDE
105044371	XM_010922235	LOC105044371	E3 ubiquitin-protein ligase SDIR1	protein_coding	XP_010920537.1	.	54	70	126	246	376065388021133	503999850816044	917399129781397	15308591330807	-1.88	2197	2853	0.04411	downReg
105044376	XM_010922240,XM_029264387	LOC105044376	actin-related protein 5, transcript variant X2	protein_coding	XP_010920542.2		134	133	75	113	93319929620059	957599716550484	546070910584165	703199520480157	0.1756	0.2017	2943	0.7465	nonDE
105044377	XM_010922253,XM_010922262,XM_019854071,XM_029264895,XM_029264897,XM_029264899,XM_029264900	LOC105044377	golgin candidate 5, transcript variant X1	protein_coding	XP_010920555.1		224	213	204	229	155997494290248	153359954605453	148531287678893	142506805477837	-0.3241	0.6332	3.91	0.3765	nonDE
105044381	XM_010922246	LOC105044381	ATP-dependent zinc metalloprotease FTSH 8, mitochondrial	protein_coding	XP_010920548.1	.	395	278	194	153	275084867163607	200159940752658	141250342204437	952119704720921	0.6158	1164	4047	0.1756	nonDE
105044383	XM_010922250	LOC105044383	uncharacterized protein At5g02240	protein_coding	XP_010920552.1	.	187	171	78	65	130230051036948	123119963556491	567913747007531	404495299391241	1007	1549	2969	0.1005	nonDE
105044391	XM_010922270	LOC105044391	uncharacterized LOC105044391	protein_coding	XP_010920572.1	.	87	131	91	149	605883125145159	943199720812883	662566038175453	927227686296844	-0.4945	0.6269	2951	0.3797	nonDE
105044393	XM_010922272,XM_010922273	LOC105044393	protein IWS1 homolog 1, transcript variant X2	protein_coding	XP_010920574.1		95	90	184	139	661596515963105	647999808192057	133969396729982	864997640236653	-1113	1815	3076	0.0709	nonDE
105044400	XM_010922277	LOC105044400	triosephosphate isomerase, cytosolic	protein_coding	XP_010920579.1	.	624	454	238	355	434564448379976	326879903243549	173286502292042	220916663513678	0.5254	1153	4765	0.1782	nonDE
105044403	XM_010922280,XM_010922281	LOC105044403	E3 ubiquitin-protein ligase PRT6, transcript variant X1	protein_coding	XP_010920582.1		407	519	496	582	283441875786299	373679889390753	361134895532994	362178868070311	-0.5674	1457	5102	0.1156	nonDE
105044422	XM_010922303,XM_029264398	LOC105044422	60S ribosomal protein L36-3, transcript variant X2	protein_coding	XP_010920605.1		221	199	57	228	153908242134575	143279957589133	415013892043965	141884505017235	0.467	0.436	3422	0.5168	nonDE
105044427	XM_019850712	LOC105044427	probable mediator of RNA polymerase II transcription subunit 37c	protein_coding	XP_019706271.1	.	3812	4893	2890	2058	265474307247511	352295895720415	210419324211765	128069434791873	0.4767	0.7833	7808	0.3068	nonDE
105044431	XM_010922320	LOC105044431	very-long-chain (3R)-3-hydroxyacyl-CoA dehydratase PASTICCINO 2A	protein_coding	XP_010920622.1	.	115	69	192	287	800879993007969	496799852947244	139794153109546	178600232192748	-1727	2863	3325	0.01885	downReg
105044435	XM_010922327	LOC105044435	uncharacterized LOC105044435	protein_coding	XP_010920629.1	.	124	108	184	129	863557557678158	777599769830468	133969396729982	802767594176463	-0.7316	1159	3.21	0.1772	nonDE
105044437	XM_010922328,XM_010922329,XM_010922330	LOC105044437	inner membrane protein PPF-1, chloroplastic, transcript variant X1	protein_coding	XP_010920630.1		1047	877	300	246	729149002329864	631439813093815	218428364233666	15308591330807	1487	3669	5.14	0.008118	upReg
105044443	XM_010922341,XM_010922342	LOC105044443	uncharacterized LOC105044443, transcript variant X1	protein_coding	XP_010920643.1		213	215	160	58	14833690305278	154799954179214	116495127591289	360934267149107	0.8756	1032	3315	0.2143	nonDE
105044444	XM_010922343,XM_010922344,XM_010922345,XM_010922346,XM_029264402	LOC105044444	UDP-glucuronic acid decarboxylase 6, transcript variant X5	protein_coding	XP_010920645.1		142	192	133	200	988912687018536	138239959080972	968365748102586	124460092120382	-0.335	0.4991	3506	0.4648	nonDE
105044446	XM_010922353,XM_010922362	LOC105044446	malonate--CoA ligase, transcript variant X2	protein_coding	XP_010920655.1		144	99	135	74	100284103472302	712799789011263	982927639051497	460502340845413	-0.03377	0.02733	2922	0.9689	nonDE
105044448	XM_010922350	LOC105044448	serine carboxypeptidase-like	protein_coding	XP_010920652.1	.	227	162	103	127	158086746445921	11663996547457	74993738386892	790321584964424	0.4017	0.6247	3359	0.3806	nonDE
105044449	XM_010922352,XM_010922355,XM_029264403	LOC105044449	uncharacterized LOC105044449, transcript variant X2	protein_coding	XP_010920654.1		125	143	127	80	870521731530402	102959969523849	924680075255852	497840368481527	0.09747	0.09417	3009	0.8775	nonDE
105044450	XM_010922357,XM_010922359,XM_010922361,XR_003800815,XR_003800816,XR_831906,XR_831907	LOC105044450	uncharacterized LOC105044450, transcript variant X1	protein_coding	XP_010920659.1		262	221	220	392	182461354928772	159119952900494	160180800438022	243941780555948	-0.6388	1241	4201	0.1563	nonDE
105044457	XM_010922368,XM_029264405,XM_029264406	LOC105044457	actin-depolymerizing factor 7, transcript variant X1	protein_coding	XP_010920670.1		175	183	102	158	121873042414256	131759960999052	742656438394464	983234727751016	0.1381	0.1786	3384	0.7738	nonDE
105044464	XM_010922377	LOC105044464	40S ribosomal protein S15a	protein_coding	XP_010920679.1	.	143	115	51	48	995876860870779	827999754912073	371328219197232	298704221088916	1059	0.9168	2469	0.2543	nonDE
105044465	XM_010922378	LOC105044465	soluble inorganic pyrophosphatase 4	protein_coding	XP_010920680.1	.	52	92	249	369	362137040316647	662399803929658	181295542313943	229628869962104	-2493	3.5	3328	0.009435	downReg
105044470	XM_010922388,XM_010922389,XR_003800820,XR_831909	LOC105044470	aspartate--tRNA ligase, chloroplastic/mitochondrial, transcript variant X3	protein_coding	XP_010920690.1		166	184	65	39	115605285947237	132479960785932	47326145583961	242697179634744	1.55	1482	2705	0.1113	nonDE
105044487	XM_010922408	LOC105044487	ABC transporter B family member 20	protein_coding	XP_010920710.1	.	385	408	612	354	268120693311364	293759913047066	445593863036678	220294363053076	-0.5596	0.9399	4892	0.2454	nonDE
105044488	XM_010922409,XM_010922410,XR_003800822	LOC105044488	vacuolar fusion protein MON1 homolog, transcript variant X3	protein_coding	XP_010920711.1		128	106	90	117	891414253087131	763199774092867	655285092700998	728091538904233	-0.1624	0.1896	2923	0.7596	nonDE
105044500	XM_010922425,XM_010922426	LOC105044500	probable glutathione S-transferase DHAR1, cytosolic, transcript variant X1	protein_coding	XP_010920727.1		151	145	117	221	105159025168872	104399969097609	851870620511297	137528401793022	-0.4761	0.7254	3417	0.331	nonDE
105044503	XM_010922433	LOC105044503	pentatricopeptide repeat-containing protein At5g02860	protein_coding	XP_010920735.1	.	241	179	84	86	167836589839061	128879961851531	611599419854265	535178396117642	0.9535	1598	3203	0.09564	nonDE
105044506	XM_010922436	LOC105044506	60S ribosomal protein L35	protein_coding	XP_010920738.1	.	351	359	105	169	244442502213737	258479923489943	764499274817831	105168777841723	1054	2.28	3912	0.03996	upReg
105044513	XM_010922446,XM_010922447	LOC105044513	probable receptor-like protein kinase At5g59700, transcript variant X2	protein_coding	XP_010920748.1		144	208	114	270	100284103472302	149759955671053	830027784087931	168021124362515	-0.3848	0.4426	3593	0.5109	nonDE
105044515	XM_010922448	LOC105044515	calcium-transporting ATPase 4, endoplasmic reticulum-type	protein_coding	XP_010920750.1	.	196	243	187	109	136497807503967	174959948211855	136153680372318	678307502056081	0.2952	0.3607	3611	0.5822	nonDE
105044520	XM_029264431	LOC105044520	uncharacterized LOC105044520	protein_coding	XP_029120264.1	.	285	267	204	255	198478954788932	192239943096977	148531287678893	158686617453487	-0.0679	0.1037	4117	0.8649	nonDE
105044531	XM_029264436,XM_029264437	LOC105044531	uncharacterized LOC105044531, transcript variant X2	protein_coding	XP_029120269.1		277	247	212	309	192907615707137	177839947359376	154356044058457	19229084232599	-0.3146	0.5986	4162	0.3956	nonDE
105044533	XM_010922467	LOC105044533	uncharacterized LOC105044533	protein_coding	XP_010920769.1	.	129	149	76	110	898378426939374	107279968245129	55335185605862	6845305066621	0.2397	0.2873	2965	0.6558	nonDE
105044543	XM_019850429,XM_019850430,XM_019850431,XM_019850432,XM_019850433,XR_002164686,XR_002164687,XR_002164688,XR_002164689,XR_002164690,XR_002164691,XR_002164692,XR_002164693,XR_003800799,XR_003800800,XR_003800801,XR_003800802	LOC105044543	glucose-induced degradation protein 4 homolog, transcript variant X1	protein_coding	XP_019705988.1		148	131	81	65	1030697730132	943199720812883	589756583430898	404495299391241	0.6219	0.8303	2802	0.286	nonDE
105044561	XM_010922489,XM_010922490,XM_010922492,XM_019850811	LOC105044561	6-phosphofructo-2-kinase/fructose-2,6-bisphosphatase, transcript variant X4	protein_coding	XP_010920791.1		1764	1415	1841	2503	12284802675357	101879969843529	134042206184726	155761805288658	-0.779	2.07	6991	0.0519	nonDE
105044570	XM_010922501,XM_019850863,XM_019850864,XM_029264473	LOC105044570	importin-11, transcript variant X4	protein_coding	XP_010920803.1		148	91	108	73	1030697730132	655199806060857	786342111241197	454279336239393	0.08777	0.07522	2816	0.9023	nonDE
105044573	XM_010922507	LOC105044573	ran-binding protein 1 homolog b	protein_coding	XP_010920809.1	.	227	254	65	175	158086746445921	182879945867536	47326145583961	108902580605334	0.7754	1061	3471	0.2052	nonDE
105044574	XM_010922508,XM_010922509,XM_019850808,XM_029264472	LOC105044574	uncharacterized LOC105044574, transcript variant X2	protein_coding	XP_010920810.1		171	144	184	146	119087372873359	103679969310729	133969396729982	908558672478787	-0.3893	0.6283	3473	0.379	nonDE
105044577	XM_010922514	LOC105044577	probable protein phosphatase 2C 32	protein_coding	XP_010920816.1	.	27	64	238	520	188032694010567	46079986360324	173286502292042	323596239512993	-3466	1832	3072	0.06971	nonDE
105044579	XM_010922516	LOC105044579	chlorophyll synthase, chloroplastic	protein_coding	XP_010920818.1	.	417	364	135	128	290406049638542	262079922424343	982927639051497	796544589570443	1233	2.83	3969	0.01982	upReg
105044580	XM_010922517	LOC105044580	probable AMP deaminase	protein_coding	XP_010920819.1	.	288	252	170	163	200568206944605	181439946293776	123776073065744	101434975078111	0.3594	0.6877	3873	0.3486	nonDE
105044585	XM_010922520,XM_010922521,XM_029264469,XM_029264470	LOC105044585	glutamate--cysteine ligase, chloroplastic, transcript variant X1	protein_coding	XP_010920822.1		69	108	99	76	480527995804782	777599769830468	720813601971098	472948350057451	-0.3348	0.3233	2587	0.6182	nonDE
105044586	XM_010922522,XM_019850372,XM_029264468	LOC105044586	metal tolerance protein 1, transcript variant X1	protein_coding	XP_010920824.1		172	152	97	159	119783790258583	10943996760577	706251711022187	989457732357035	0.02241	0.02441	3296	0.9714	nonDE
105044587	XM_010923274,XM_010927659,XM_010929109,XM_019853501,XR_003800014,XR_831968,XR_832097,XR_832163,XR_832208,XR_832514,XR_832578,XR_832700,XR_832746,XR_832930,XR_833002,XR_833148	LOC105044587	coatomer subunit beta'-1, transcript variant X7	protein_coding	XP_010921576.1		589	734	575	472	410189839897125	528479843569966	418654364781193	293725817404101	0.0004012	0.00055	5338	0.9994	nonDE
105044588	XM_010922524	LOC105044588	acyl-coenzyme A oxidase 4, peroxisomal	protein_coding	XP_010920826.1	.	460	309	521	827	320351997203188	222479934145939	379337259219133	514642480917779	-1139	2643	5104	0.0248	downReg
105044593	XM_010922526,XM_010922528,XM_029264466	LOC105044593	phosphoinositide phosphatase SAC8, transcript variant X2	protein_coding	XP_010920828.1		140	93	146	158	97498433931405	669599801798459	106301803927051	983234727751016	-0.7403	1295	3.19	0.1445	nonDE
105044594	XM_010922531,XM_010922532,XM_010922541,XM_019850726,XM_019850728,XM_019850729,XM_019850731,XM_019850733,XM_019850734,XM_019850735,XM_029264460,XM_029264461,XM_029264462,XM_029264463,XM_029264464,XM_029264465,XR_003800839,XR_003800840	LOC105044594	uncharacterized LOC105044594, transcript variant X16	protein_coding	XP_010920833.1		170	174	108	87	118390955488135	125279962917131	786342111241197	541401400723661	0.5044	0.7712	3162	0.312	nonDE
105044596	XM_010922542,XM_029264459,XR_003800838	LOC105044596	omega-3 fatty acid desaturase, chloroplastic, transcript variant X3	protein_coding	XP_010920844.2		163	175	151	141	113516033791564	125999962704011	109942276664279	877443649448692	-0.1231	0.1671	3443	0.7861	nonDE
105044598	XM_010922545	LOC105044598	zinc finger CCCH domain-containing protein 33	protein_coding	XP_010920847.1	.	128	88	298	224	891414253087131	633599812454456	216972175138775	139395303174828	-1.6	2766	3.52	0.02128	downReg
105044609	XM_010922559,XM_019850913,XM_019850914,XM_029264458	LOC105044609	uncharacterized LOC105044609, transcript variant X1	protein_coding	XP_010920861.1		251	208	144	160	174800763691305	149759955671053	10484561483216	995680736963054	0.2511	0.4219	3688	0.5272	nonDE
105044610	XM_010922560	LOC105044610	putative serine/threonine-protein kinase-like protein CCR3	protein_coding	XP_010920862.1	.	6	30	114	129	0.417850431134593	215999936064019	830027784087931	802767594176463	-3497	0.8076	1515	0.2952	nonDE
105044618	XM_010922570	LOC105044618	dnaJ protein P58IPK homolog B	protein_coding	XP_010920872.1	.	139	149	89	21	968020165461806	107279968245129	648004147226542	130683096726401	1.58	1.03	2458	0.2153	nonDE
105044622	XM_010922576,XM_010922577,XM_010922578,XM_019850722	LOC105044622	uncharacterized LOC105044622, transcript variant X1	protein_coding	XP_010920878.1		182	182	230	220	126747964110826	131039961212171	167461745912477	13690610133242	-0.6407	1399	3808	0.1257	nonDE
105044625	XM_010922583	LOC105044625	serine carboxypeptidase-like 27	protein_coding	XP_010920885.1	.	142	160	47	38	988912687018536	11519996590081	34220443729941	236474175028725	1522	1078	2473	0.1989	nonDE
105044633	XM_010922600,XM_029264453,XR_831935	LOC105044633	alpha-taxilin, transcript variant X2	protein_coding	XP_010920902.1		184	120	73	79	128140798881275	863999744256076	531509019635254	491617363875508	0.6337	0.8238	2882	0.2888	nonDE
105044637	XM_010922603	LOC105044637	40S ribosomal protein S26	protein_coding	XP_010920905.1	.	216	163	78	70	150426155208453	11735996526145	567913747007531	435610322421336	1017	1562	3.03	0.09901	nonDE
105044639	XM_019850770	LOC105044639	E3 SUMO-protein ligase SIZ1	protein_coding	XP_019706329.1	.	162	112	102	108	11281961640634	806399761305671	742656438394464	672084497450062	0.02917	0.02961	3043	0.9651	nonDE
105044641	XM_010922606	LOC105044641	uncharacterized LOC105044641	protein_coding	XP_010920908.1	.	134	104	45	57	93319929620059	748799778355266	327642546350499	354711262543088	0.8592	0.7273	2427	0.3307	nonDE
105044642	XM_010922607,XM_010922608,XM_029264451	LOC105044642	uncharacterized LOC105044642, transcript variant X3	protein_coding	XP_010920909.1		32	82	110	116	222853563271783	590399825241652	800904002190108	721868534298214	-1539	1386	2404	0.1277	nonDE
105044645	XM_010922610	LOC105044645	elongation factor 1-alpha	protein_coding	XP_010920912.1	.	1884	2020	1386	1798	131205035376262	145439956949773	100913904275954	111889622816223	-0.03042	0.04927	6921	0.9365	nonDE
105044657	XM_010922625	LOC105044657	uncharacterized LOC105044657	protein_coding	XP_010920927.1	.	139	110	131	145	968020165461806	791999765568069	953803857153675	902335667872768	-0.4907	0.8305	3178	0.286	nonDE
105044664	XM_010922639	LOC105044664	mitogen-activated protein kinase 5	protein_coding	XP_010920941.1	.	307	278	1502	2675	213800137263867	200159940752658	109359801026322	166465373211011	-3106	5672	5725	0.001204	downReg
105044665	XM_010922640,XR_831938	LOC105044665	probable LRR receptor-like serine/threonine-protein kinase At1g67720, transcript variant X1	protein_coding	XP_010920942.1	.	76	55	149	165	529277212770484	395999882784035	108486087569387	102679575999315	-1598	2385	2805	0.03463	downReg
105044666	XM_010922642	LOC105044666	L-ascorbate peroxidase, cytosolic	protein_coding	XP_010920944.1	.	2745	2612	233	597	191166572244076	188063944333072	169646029554814	37151337497934	2486	3947	6.11	0.005698	upReg
105044670	XM_010922646,XM_010922647	LOC105044670	APETALA2-like protein 1, transcript variant X1	protein_coding	XP_010920948.1		524	427	270	625	364922709857544	307439908997787	196585527810299	388937787876193	-0.1492	0.1816	4929	0.7704	nonDE
105044671	XM_029264443	LOC105044671	pentatricopeptide repeat-containing protein At5g02830, chloroplastic	protein_coding	XP_029120276.1	.	289	276	106	120	201264624329829	198719941178897	771780220292286	746760552722291	0.981	2107	3628	0.04931	upReg
105044676	XM_010922658,XM_010922659,XM_019850772,XM_019850773,XM_019850775,XM_019850776	LOC105044676	two-component response regulator-like PRR37, transcript variant X6	protein_coding	XP_010920960.1		120	84	158	101	835700862269185	604799820979253	115038938496397	628523465207928	-0.634	0.8106	2965	0.2946	nonDE
105044682	XM_010922672	LOC105044682	probable protein phosphatase 2C 38	protein_coding	XP_010920974.2	.	40	50	161	146	278566954089728	359999893440032	117223222138734	908558672478787	-2113	1711	2526	0.08125	nonDE
105044695	XM_029264374	LOC105044695	anaphase-promoting complex subunit 1	protein_coding	XP_029120207.1	.	274	180	253	144	190818363551464	129599961638411	184207920503725	896112663266749	-0.1026	0.103	3833	0.866	nonDE
105044707	XM_010922693	LOC105044707	importin subunit beta-1	protein_coding	XP_010920995.1	.	183	190	139	135	127444381496051	136799959507212	101205142094932	840105621812577	0.11	0.1492	3468	0.8081	nonDE
105044712	XM_010922697	LOC105044712	LIMR family protein Os06g0128200	protein_coding	XP_010920999.1	.	98	189	165	184	682489037519835	136079959720332	120135600328516	114503284750751	-0.7072	1056	3415	0.2064	nonDE
105044721	XM_010922708	LOC105044721	gamma-interferon-responsive lysosomal thiol protein	protein_coding	XP_010921010.2	.	204	227	127	227	142069146585762	163439951621774	924680075255852	141262204556633	-0.01361	0.01509	3726	0.9828	nonDE
105044727	XM_010922715	LOC105044727	mitoferrin	protein_coding	XP_010921017.1	.	116	100	45	26	807844166860213	719999786880063	327642546350499	161798119756496	1369	0.6885	2081	0.3485	nonDE
105044731	XM_010922719	LOC105044731	40S ribosomal protein S7	protein_coding	XP_010921021.1	.	182	141	140	74	126747964110826	101519969950089	101933236642377	460502340845413	0.3597	0.4026	3146	0.5443	nonDE
105044745	XM_010922741	LOC105044745	macrophage migration inhibitory factor homolog	protein_coding	XP_010921043.1	.	133	141	52	86	926235122348347	101519969950089	378609164671688	535178396117642	0.6494	0.8098	2732	0.2948	nonDE
105044749	XM_010922747	LOC105044749	uncharacterized LOC105044749	protein_coding	XP_010921049.1	.	873	591	385	460	607972377300832	425519874046117	280316400766538	286258211876878	0.4312	0.9865	5248	0.2286	nonDE
105044755	XM_010922752	LOC105044755	uncharacterized LOC105044755	protein_coding	XP_010921054.1	.	56	57	305	232	38999373572562	410399878521636	222068836970894	144373706859643	-2558	2.88	3089	0.01885	downReg
105044758	XM_010922754	LOC105044758	WRKY transcription factor WRKY24	protein_coding	XP_010921056.1	.	211	405	548	1064	146944068282332	291599913686426	398995812000163	662127690080431	-1736	2863	5029	0.01885	downReg
105044762	XM_010922762	LOC105044762	U2 small nuclear ribonucleoprotein B''	protein_coding	XP_010921064.1	.	183	116	51	106	127444381496051	835199752780873	371328219197232	659638488238023	0.6081	0.6768	2845	0.3546	nonDE
105044770	XM_010922775,XM_010922776	LOC105044770	uncharacterized LOC105044770, transcript variant X1	protein_coding	XP_010921077.1		138	113	124	25	961055991609563	813599759174471	902837238832486	155575115150477	1129	0.8804	2537	0.2678	nonDE
105044771	XM_010922777,XM_029264485,XM_029264486	LOC105044771	E3 ubiquitin-protein ligase listerin, transcript variant X2	protein_coding	XP_010921079.1		431	468	432	327	300155893031682	33695990025987	314536844496479	203492250616824	-0.07568	0.111	4828	0.8567	nonDE
105044777	XM_010922782,XM_010922784,XM_029264488	LOC105044777	TOM1-like protein 6, transcript variant X1	protein_coding	XP_010921084.1		249	108	153	214	173407928920856	777599769830468	11139846575917	133172298568809	-0.4764	0.5996	3576	0.395	nonDE
105044782	XM_010922791,XM_019850859	LOC105044782	uncharacterized LOC105044782, transcript variant X1	protein_coding	XP_010921093.1		169	216	146	225	11769453810291	155519953966094	106301803927051	14001760363543	-0.2742	0.4104	3687	0.5375	nonDE
105044795	XM_010922811	LOC105044795	adenine/guanine permease AZG1	protein_coding	XP_010921113.1	.	75	57	153	121	522313038918241	410399878521636	11139846575917	75298355732831	-1365	1842	2711	0.0688	nonDE
105044796	XM_010922812	LOC105044796	CBL-interacting protein kinase 18	protein_coding	XP_010921114.1	.	458	376	366	397	318959162432739	270719919866904	266482604365072	247053282858958	-0.215	0.454	4781	0.5009	nonDE
105044798	XM_010922813	LOC105044798	uroporphyrinogen decarboxylase	protein_coding	XP_010921115.1	.	91	128	130	157	633739820554132	921599727206481	946522911679219	977011723144997	-0.7539	1261	3106	0.1525	nonDE
105044799	XM_010922814	LOC105044799	5-amino-6-(5-phospho-D-ribitylamino)uracil phosphatase, chloroplastic	protein_coding	XP_010921116.1	.	324	254	135	248	22563923281268	182879945867536	982927639051497	154330514229273	0.2982	0.4532	3987	0.5015	nonDE
105044802	XM_010922818,XM_019850877,XM_019850878	LOC105044802	putative potassium transporter 8, transcript variant X3	protein_coding	XP_010921120.1		0	11	106	211	0	0.791999765568069	771780220292286	131305397187003	-6329	0.8914	0.3893	0.2642	nonDE
105044809	NM_001319910,XM_019850295	LOC105044809	superoxide dismutase [Mn], mitochondrial-like	protein_coding	NP_001306839.1		184	149	53	147	128140798881275	107279968245129	385890110146143	914781677084806	0.5087	0.5658	3068	0.4182	nonDE
105044814	XM_010922834,XM_010922835,XM_010922837,XM_019850814,XM_029264503,XM_029264504	LOC105044814	nardilysin-like, transcript variant X5	protein_coding	XP_010921136.1		285	149	190	146	198478954788932	107279968245129	138337964014655	908558672478787	-0.01569	0.01475	3681	0.9831	nonDE
105044816	XM_010922838,XM_029264505	LOC105044816	protein ACTIVITY OF BC1 COMPLEX KINASE 3, chloroplastic, transcript variant X1	protein_coding	XP_010921140.1		351	345	196	166	244442502213737	248399926473622	142706531299328	103301876459917	0.6138	1355	4115	0.1328	nonDE
105044820	XM_010922849	LOC105044820	COP1-interacting protein 7	protein_coding	XP_010921151.1	.	81	121	181	50	5640980820317	871199742124876	131785113087645	311150230300954	-0.209	0.1276	2752	0.8356	nonDE
105044830	XM_010922856	LOC105044830	trans-cinnamate 4-monooxygenase	protein_coding	XP_010921158.1	.	330	279	204	209	229817737124026	200879940539538	148531287678893	130060796265799	0.2186	0.3958	4114	0.5494	nonDE
105044831	XM_010922857,XM_010922858	LOC105044831	probable inactive serine/threonine-protein kinase scy1, transcript variant X2	protein_coding	XP_010921159.1		120	184	139	128	835700862269185	132479960785932	101205142094932	796544589570443	-0.1825	0.2147	3286	0.7312	nonDE
105044835	XM_010922862,XM_010922863,XM_029264508,XM_029264509	LOC105044835	transmembrane protein 87B, transcript variant X2	protein_coding	XP_010921164.1		130	94	83	161	905342600791618	676799799667259	604318474379809	100190374156907	-0.4266	0.5187	2971	0.4513	nonDE
105044839	XM_010922867,XM_019850760	LOC105044839	E3 ubiquitin-protein ligase SHPRH, transcript variant X1	protein_coding	XP_010921169.1		568	717	298	378	395565074807414	516239847193005	216972175138775	235229574107522	0.5828	1429	4999	0.1208	nonDE
105044843	XM_010922877	LOC105044843	serine/threonine-protein kinase AtPK2/AtPK19	protein_coding	XP_010921179.1	.	61	40	97	133	424814604986836	287999914752025	706251711022187	827659612600539	-1517	1367	2381	0.1308	nonDE
105044846	XM_010922882	LOC105044846	receptor-like protein kinase FERONIA	protein_coding	XP_010921184.1	.	96	201	327	562	668560689815348	144719957162893	238086917014696	349732858858273	-1983	3104	4078	0.01456	downReg
105044849	XM_010922885,XM_010922887,XM_029264516,XM_029264517	LOC105044849	ubiquitin-conjugating enzyme E2-17 kDa, transcript variant X2	protein_coding	XP_010921187.1		117	106	57	28	814808340712456	763199774092867	415013892043965	174244128968534	1224	0.7333	2216	0.3278	nonDE
105044852	XM_010922893	LOC105044852	ABC transporter I family member 6, chloroplastic	protein_coding	XP_010921195.1	.	296	214	116	54	206139546026399	154079954392333	844589675036842	336042248725031	1384	1881	3291	0.06526	nonDE
105044856	XM_010922899,XM_029264522,XR_003800858	LOC105044856	probable LRR receptor-like serine/threonine-protein kinase At1g06840, transcript variant X3	protein_coding	XP_010921201.1		156	192	227	193	108641112094994	138239959080972	165277462270141	120103988896168	-0.6096	1156	3.72	0.178	nonDE
105044858	XM_010922900	LOC105044858	60S ribosomal protein L10	protein_coding	XP_010921202.1	.	434	315	176	185	302245145187355	22679993286722	128144640350417	115125585211353	0.6977	1551	4159	0.1005	nonDE
105044859	XM_010922902,XM_019850301,XM_019850302	LOC105044859	putative zinc transporter At3g08650, transcript variant X3	protein_coding	XP_010921204.1		109	148	106	51	75909494989451	106559968458249	771780220292286	317373234906974	0.4944	0.4779	2746	0.4825	nonDE
105044863	XM_010922905,XM_019850701,XM_019850702,XM_019850703	LOC105044863	autophagy-related protein 18c, transcript variant X4	protein_coding	XP_010921207.1		172	136	89	77	119783790258583	979199710156886	648004147226542	47917135466347	0.5626	0.7981	2964	0.2992	nonDE
105044865	XM_010922909	LOC105044865	uncharacterized LOC105044865	protein_coding	XP_010921211.1	.	200	178	161	146	139283477044864	128159962064651	117223222138734	908558672478787	-0.03224	0.04018	3558	0.9509	nonDE
105044867	XM_010922917,XM_010922919,XM_010922921,XM_029264526,XM_029264527	LOC105044867	protein PIN-LIKES 6, transcript variant X5	protein_coding	XP_010921219.1		119	62	166	107	828736688416942	446399867865639	120863694875962	665861492844043	-0.9281	1.13	2892	0.1838	nonDE
105044872	XM_010922926	LOC105044872	uncharacterized LOC105044872	protein_coding	XP_010921228.1	.	564	479	285	254	392779405266517	34487989791555	207506946021983	158064316992885	0.6171	1532	4692	0.103	nonDE
105044875	XM_010922933	LOC105044875	uncharacterized LOC105044875	protein_coding	XP_010921235.1	.	352	272	85	133	245138919598961	195839942031377	61888036532872	827659612600539	1181	2283	3651	0.03986	upReg
105044877	XM_010922935,XM_010922937	LOC105044877	mediator of RNA polymerase II transcription subunit 33A, transcript variant X1	protein_coding	XP_010921237.1		686	679	303	485	477742326263884	488879855291563	220612647876003	301815723391926	0.4847	1154	5144	0.1781	nonDE
105044878	XM_010922939,XM_010922942,XM_019850837	LOC105044878	COP1-interacting protein 7, transcript variant X1	protein_coding	XP_010921241.1		119	105	149	116	828736688416942	755999776224066	108486087569387	721868534298214	-0.5534	0.8407	3071	0.2831	nonDE
105044884	XM_010922948,XM_010922949	LOC105044884	uncharacterized LOC105044884, transcript variant X1	protein_coding	XP_010921250.1		189	149	117	140	131622885807397	107279968245129	851870620511297	871220644842673	0.0498	0.06019	3344	0.9208	nonDE
105044888	gene-LOC105044888	LOC105044888	.	pseudogene	.	.	93	96	107	182	647668168258619	691199795404861	779061165766742	113258683829547	-0.919	1444	2993	0.1181	nonDE
105044890	XM_010922961,XM_010922962,XM_010922963,XM_010922964,XM_029264533,XM_029264534	LOC105044890	repressor of RNA polymerase III transcription MAF1 homolog, transcript variant X6	protein_coding	XP_010921263.1		36	78	172	258	250710258680756	561599833766449	125232262160635	160553518835293	-2386	2411	2876	0.03364	downReg
105044893	XM_010922967,XM_010922968,XM_010922969	LOC105044893	probable NOT transcription complex subunit VIP2, transcript variant X1	protein_coding	XP_010921269.1		712	648	381	337	495849178279717	466559861898281	277404022576756	209715255222843	0.588	1.56	5092	0.09901	nonDE
105044894	XM_010922970,XM_010922971,XM_019850740,XM_019850741,XM_019850742,XM_019850743	LOC105044894	zinc finger CCCH domain-containing protein 53, transcript variant X3	protein_coding	XP_010921272.1		198	212	599	500	137890642274416	152639954818573	436128633919886	311150230300954	-1752	3.93	4533	0.005786	downReg
105044900	XM_010922983	LOC105044900	NAC domain-containing protein 68	protein_coding	XP_010921285.1	.	127	234	319	441	884450079234888	168479950129935	232262160635131	274434503125442	-1471	2745	4137	0.02204	downReg
105044901	XM_010922984,XM_029264536	LOC105044901	protein NCA1, transcript variant X1	protein_coding	XP_010921286.1		891	734	337	471	62050789023487	528479843569966	245367862489151	293103516943499	0.6771	1858	5294	0.06732	nonDE
105044902	XM_010922985	LOC105044902	guanine nucleotide exchange factor SPIKE 1	protein_coding	XP_010921287.1	.	649	724	797	675	451974883010584	521279845701166	580291354314106	420052810906288	-0.4353	1062	5614	0.2047	nonDE
105044906	XM_010922990,XM_029264550	LOC105044906	NAC domain-containing protein 100, transcript variant X1	protein_coding	XP_010921292.1		158	117	38	71	110033946865443	842399750649674	27667592802931	441833327027355	0.9586	0.8494	2546	0.2798	nonDE
105044910	XM_010922993,XM_019850395	LOC105044910	transcription factor Pur-alpha 1, transcript variant X1	protein_coding	XP_010921295.1		264	323	163	284	183854189699221	23255993116226	118679411233625	176733330810942	0.08687	0.11	4116	0.8581	nonDE
105044912	XM_010922995,XM_010922996,XM_010922999,XM_019850754,XM_019850755,XM_019850756,XM_019850757	LOC105044912	uncharacterized LOC105044912, transcript variant X1	protein_coding	XP_010921297.1		307	162	71	202	213800137263867	11663996547457	516947128686343	125704693041586	0.5124	0.5185	3501	0.4513	nonDE
105044914	XM_010923001,XM_010923003,XM_010923004,XM_010923005,XM_010923006,XM_010923007,XM_010923008,XM_019850872	LOC105044914	mediator of RNA polymerase II transcription subunit 27, transcript variant X1	protein_coding	XP_010921303.1		409	231	166	142	284834710556747	166319950769295	120863694875962	883666654054711	0.6762	1107	3.91	0.1898	nonDE
105044916	XM_010923024,XM_010923033,XM_029266557,XM_029266559	LOC105044916	uncharacterized LOC105044916, transcript variant X2	protein_coding	XP_010921326.1		181	188	213	228	126051546725602	135359959933452	155084138605903	141884505017235	-0.5949	1307	3803	0.1427	nonDE
105044919	XM_010923016	LOC105044919	cyclic dof factor 2	protein_coding	XP_010921318.1	.	88	99	214	129	612847298997403	712799789011263	155812233153348	802767594176463	-1153	1621	3.11	0.09256	nonDE
105044920	XM_010923054,XM_019846851	LOC105044920	uncharacterized LOC105044920, transcript variant X1	protein_coding	XP_010921356.1		54	100	59	130	376065388021133	719999786880063	429575782992876	808990598782482	-0.6519	0.6006	2479	0.3948	nonDE
105044932	XM_019850629	LOC105044932	probable lysophospholipase BODYGUARD 4	protein_coding	XP_019706188.1	.	110	122	30	25	766059123746753	878399739993677	218428364233666	155575115150477	1745	0.7097	1975	0.3391	nonDE
105044935	XM_010923038	LOC105044935	S-adenosylmethionine synthase	protein_coding	XP_010921340.1	.	674	777	1702	2256	469385317641192	559439834405809	123921691975233	140390983911791	-1773	4512	6362	0.003104	downReg
105044936	XM_010923040,XM_019850840,XM_019850841,XM_019850842,XM_029264559	LOC105044936	calmodulin-binding transcription activator 1, transcript variant X1	protein_coding	XP_010921342.1		321	259	158	239	223549980657007	186479944801936	115038938496397	148729810083856	0.2243	0.367	4034	0.5764	nonDE
105044944	XM_010923047	LOC105044944	ubiquitin-40S ribosomal protein S27a	protein_coding	XP_010921349.1	.	361	404	119	209	25140667606598	290879913899545	866432511460208	130060796265799	0.9173	1911	4086	0.0625	nonDE
105044948	XM_010923055	GSK	shaggy-related protein kinase alpha	protein_coding	XP_010921357.2	.	541	506	635	749	376761805406358	364319892161312	462340037627926	46610304499083	-0.7378	2296	5375	0.03887	downReg
105044954	XM_010923063,XM_029264560	LOC105044954	inactive glucose-6-phosphate 1-dehydrogenase 4, chloroplastic, transcript variant X2	protein_coding	XP_010921365.1		759	583	412	431	52858079538526	419759875751077	299974953547568	268211498519423	0.3209	0.7553	5193	0.3182	nonDE
105044959	XM_010923074,XM_010923075,XM_029264565	LOC105044959	YTH domain-containing protein ECT4, transcript variant X1	protein_coding	XP_010921376.1		145	155	98	79	100980520857527	11159996696641	713532656496642	491617363875508	0.4456	0.6107	2994	0.3883	nonDE
105044960	XM_010923080	LOC105044960	ubiquitin-conjugating enzyme E2 2	protein_coding	XP_010921382.1	.	185	190	94	191	128837216266499	136799959507212	68440887459882	118859387974965	0.1162	0.1302	3457	0.8319	nonDE
105044962	XM_010923083,XM_029264566	LOC105044962	protein NAR1, transcript variant X1	protein_coding	XP_010921385.1		128	116	59	172	891414253087131	835199752780873	429575782992876	107035679223528	-0.1226	0.1003	2942	0.87	nonDE
105044970	XM_010923092	LOC105044970	30S ribosomal protein S1, chloroplastic	protein_coding	XP_010921394.1	.	1287	951	278	356	896289174783701	68471979732294	202410284189864	22153896397428	1469	3.75	5349	0.007311	upReg
105044972	XM_010923095	LOC105044972	AP-3 complex subunit mu	protein_coding	XP_010921397.1	.	68	101	46	115	473563821952538	727199784748864	334923491824954	715645529692195	-0.2206	0.1649	2432	0.7888	nonDE
105044978	XM_010923101,XM_010923102,XM_010923103	LOC105044978	long chain acyl-CoA synthetase 1, transcript variant X2	protein_coding	XP_010921403.1		190	136	209	148	132319303192621	979199710156886	152171760416121	921004681690825	-0.4525	0.6824	3541	0.3513	nonDE
105044982	XM_010923106	LOC105044982	adenylosuccinate lyase	protein_coding	XP_010921408.1	.	164	134	67	80	114212451176789	964799714419285	487823346788521	497840368481527	0.6723	0.9571	2854	0.2397	nonDE
105044999	XM_010923139	LOC105044999	uncharacterized LOC105044999	protein_coding	XP_010921441.1	.	534	364	195	256	371886883709788	262079922424343	141978436751883	159308917914089	0.6387	1377	4.44	0.129	nonDE
105045000	XM_010923140	LOC105045000	probable enoyl-CoA hydratase 1, peroxisomal	protein_coding	XP_010921442.1	.	153	109	83	85	106551859939321	784799767699269	604318474379809	528955391511623	0.2905	0.3387	2853	0.6028	nonDE
105045001	XM_010923146,XM_010923154	LOC105045001	uncharacterized LOC105045001, transcript variant X1	protein_coding	XP_010921448.1		397	248	324	276	276477701934056	178559947146256	235902633372359	171754927126127	-0.257	0.4022	4405	0.5447	nonDE
105045005	XM_010923150	LOC105045005	phytochrome B	protein_coding	XP_010921452.1	.	225	193	293	281	156693911675472	138959958867852	213331702401547	174866429429136	-0.7939	1891	4.08	0.06406	nonDE
105045006	XM_010923151	LOC105045006	ATP-citrate synthase beta chain protein 1	protein_coding	XP_010921453.2	.	1882	1961	525	549	131065751899217	14119195820718	382249637408915	341642952870448	1501	4139	6132	0.004991	upReg
105045008	XM_010923155,XM_010923156,XR_002164836,XR_003800879	LOC105045008	nodal modulator 1, transcript variant X2	protein_coding	XP_010921457.1		656	546	465	580	456849804707155	393119883636514	338563964562182	360934267149107	-0.1359	0.278	5268	0.6649	nonDE
105045014	XM_010923165,XM_010923166	LOC105045014	protein high chlorophyll fluorescent 107, transcript variant X1	protein_coding	XP_010921467.1		696	547	287	397	484706500116128	393839883423394	208963135116874	247053282858958	0.5256	1309	4979	0.1426	nonDE
105045020	XM_010923173,XM_010923175,XM_010923176,XR_831982,XR_831983,XR_831984,XR_831985,XR_831986,XR_831987,XR_831988,XR_831989,XR_831990,XR_831992	LOC105045020	DEAD-box ATP-dependent RNA helicase 24, transcript variant X13	protein_coding	XP_010921475.1		233	142	215	136	162265250757267	102239969736969	156540327700794	846328626418596	-0.2292	0.2596	3.61	0.6847	nonDE
105045022	XM_010923181,XM_010923182,XR_003800881	LOC105045022	receptor-like serine/threonine-protein kinase ALE2, transcript variant X1	protein_coding	XP_010921483.1		282	246	165	147	196389702633259	177119947572496	120135600328516	914781677084806	0.4261	0.8123	3809	0.2941	nonDE
105045024	XM_010923184,XM_010923185	LOC105045024	titin homolog, transcript variant X2	protein_coding	XP_010921486.1		185	211	142	168	128837216266499	151919955031693	103389425737269	104546477381121	0.01152	0.01419	3596	0.9836	nonDE
105045037	XM_010923197,XM_019850787	LOC105045037	bromodomain and WD repeat-containing protein 3, transcript variant X1	protein_coding	XP_010921499.1		601	518	522	361	418546848519817	372959889603873	380065353766579	224650466277289	0.03228	0.04284	5088	0.9464	nonDE
105045048	XM_010923218	LOC105045048	uncharacterized LOC105045048	protein_coding	XP_010921520.1	.	49	90	98	126	341244518759917	647999808192057	713532656496642	784098580358405	-1115	1396	2577	0.1262	nonDE
105045050	XM_010923209,XM_010923210	LOC105045050	cation-chloride cotransporter 1, transcript variant X1	protein_coding	XP_010921511.1		215	381	352	110	149729737823229	274319918801304	256289280700835	6845305066621	0.2202	0.158	4038	0.7975	nonDE
105045057	XM_010923217	LOC105045057	uncharacterized LOC105045057	protein_coding	XP_010921519.1	.	139	115	247	255	968020165461806	827999754912073	179839353219052	158686617453487	-1.32	2879	3625	0.01885	downReg
105045067	XM_010923227,XM_010923228	LOC105045067	protein SHORT ROOT IN SALT MEDIUM 1, transcript variant X1	protein_coding	XP_010921529.1		739	671	455	516	514652447680773	483119856996522	331283019087727	321107037670585	0.1995	0.4654	5335	0.4929	nonDE
105045104	XM_019850777,XM_019850778,XM_029264552	LOC105045104	phospholipid-transporting ATPase 1, transcript variant X1	protein_coding	XP_019706336.1		83	177	298	249	578026429736187	127439962277771	216972175138775	154952814689875	-1511	2363	3654	0.03572	downReg
105045117	XM_019850940	LOC105045117	ATP-dependent Clp protease proteolytic subunit 5, chloroplastic	protein_coding	XP_019706499.1	.	856	584	157	144	596133281752019	420479875537957	114310843948952	896112663266749	1899	3.89	4495	0.005871	upReg
105045120	XM_010923279,XM_029266498	LOC105045120	50S ribosomal protein L35, chloroplastic, transcript variant X1	protein_coding	XP_010921581.1		142	128	47	126	988912687018536	921599727206481	34220443729941	784098580358405	0.4086	0.413	2822	0.5349	nonDE
105045131	XM_010923286,XM_010923287	LOC105045131	protein TPR1, transcript variant X1	protein_coding	XP_010921588.1		1078	807	647	576	750737941271818	581039828012211	471077172197273	3584450653067	0.2739	0.5879	5704	0.4033	nonDE
105045134	XM_010923290,XM_019850904,XM_029264592,XR_832003	LOC105045134	ATP-dependent RNA helicase DEAH13, transcript variant X1	protein_coding	XP_010921592.1		100	133	136	129	696417385224321	957599716550484	990208584525952	802767594176463	-0.5381	0.8329	3099	0.2852	nonDE
105045137	XM_010923292,XM_010923293,XM_010923295,XM_010923296,XM_019850861	LOC105045137	probable ethylene response sensor 1, transcript variant X5	protein_coding	XP_010921594.1		276	241	197	384	192211198321913	173519948638095	143434625846774	238963376871133	-0.4474	0.7455	4203	0.3226	nonDE
105045138	XM_010923297	LOC105045138	probable protein phosphatase 2C 73	protein_coding	XP_010921599.1	.	151	110	59	12	105159025168872	791999765568069	429575782992876	0.746760552722291	2062	0.7751	2036	0.3104	nonDE
105045139	XM_010923298	LOC105045139	phospholipase D zeta 1	protein_coding	XP_010921600.1	.	382	332	261	188	266031441155691	239039929244181	190032676883289	116992486593159	0.3559	0.6275	4.28	0.3795	nonDE
105045140	XM_010923300	LOC105045140	60S ribosomal protein L19-3	protein_coding	XP_010921602.1	.	198	297	109	121	137890642274416	213839936703379	793623056715653	75298355732831	0.7314	1.2	3531	0.1657	nonDE
105045146	XM_010923313,XM_019851001,XM_029264608	LOC105045146	probable LRR receptor-like serine/threonine-protein kinase At1g53440, transcript variant X1	protein_coding	XP_010921615.1		111	171	75	80	773023297598997	123119963556491	546070910584165	497840368481527	0.4829	0.5505	2842	0.4291	nonDE
105045148	XM_010923316,XR_832004	LOC105045148	probable acyl-CoA dehydrogenase IBR3, transcript variant X1	protein_coding	XP_010921618.1	.	229	191	175	166	15947958121637	137519959294092	127416545802972	103301876459917	-0.03857	0.05017	3708	0.9352	nonDE
105045149	XM_010923317	LOC105045149	sucrose synthase 4	protein_coding	XP_010921619.1	.	802	624	620	731	558526742949906	449279867013159	451418619416243	454901636699995	-0.2677	0.6435	5575	0.3714	nonDE
105045150	XM_010923318	LOC105045150	multiple organellar RNA editing factor 3, mitochondrial	protein_coding	XP_010921620.1	.	155	160	24	61	10794469470977	11519996590081	174742691386933	379603280967164	1597	0.9775	2435	0.2319	nonDE
105045152	XM_010923320	LOC105045152	putative GTP diphosphokinase RSH1, chloroplastic	protein_coding	XP_010921622.1	.	751	788	320	313	523009456303465	56735983206149	232990255182577	194780044168397	0.9443	2677	5092	0.02398	upReg
105045160	XM_010923331,XM_010923333	LOC105045160	phosphoinositide phosphatase SAC1, transcript variant X2	protein_coding	XP_010921633.1		236	146	281	177	16435450291294	105119968884489	2045945678322	110147181526538	-0.5856	0.8483	3816	0.2801	nonDE
105045184	XM_010923357	LOC105045184	uncharacterized protein C57A7.06	protein_coding	XP_010921659.1	.	194	247	122	98	135104972733518	177839947359376	888275347883575	609854451389871	0.6751	1113	3422	0.1886	nonDE
105045186	XM_010923360,XM_010923361	LOC105045186	UDP-glucuronic acid decarboxylase 2, transcript variant X1	protein_coding	XP_010921662.1		159	244	124	141	110730364250667	175679947998735	902837238832486	877443649448692	0.2292	0.2927	3483	0.6508	nonDE
105045188	XM_010923364	LOC105045188	protein pleiotropic regulatory locus 1	protein_coding	XP_010921666.1	.	446	312	328	254	310602153810047	22463993350658	238815011562141	158064316992885	0.04429	0.05654	4504	0.9258	nonDE
105045197	XM_010923376,XM_019850691,XR_002164798,XR_002164799,XR_002164800,XR_002164801,XR_003800896,XR_003800897,XR_003800898,XR_003800899,XR_003800900,XR_003800901,XR_003800902,XR_003800903	LOC105045197	serine/arginine-rich-splicing factor SR34, transcript variant X13	protein_coding	XP_010921678.1		473	421	243	399	329405423211104	303119910276507	176926975029269	248297883780162	0.1691	0.2863	4688	0.6565	nonDE
105045199	XM_010923378	LOC105045199	beta-glucosidase 11	protein_coding	XP_010921680.1	.	80	102	72	134	557133908179457	734399782617664	524228074160798	833882617206558	-0.4978	0.5708	2709	0.415	nonDE
105045203	XM_010923380,XM_019850705,XM_019850706,XM_019850707	LOC105045203	beta-glucosidase 22, transcript variant X1	protein_coding	XP_010921682.1		93	109	216	773	647668168258619	784799767699269	157268422248239	481038256045276	-2383	2333	3812	0.03684	downReg
105045204	XM_010923382	LOC105045204	translationally-controlled tumor protein homolog	protein_coding	XP_010921684.1	.	1669	1319	2624	2873	116232061593939	949679718894803	191052009249713	178786922330928	-1229	3268	7123	0.01216	downReg
105045226	XM_010923429	LOC105045226	sodium/hydrogen exchanger 2	protein_coding	XP_010921731.1	.	68	66	117	134	473563821952538	475199859340842	851870620511297	833882617206558	-1238	1852	2669	0.06769	nonDE
105045227	XM_010923430,XM_010923431,XM_010923432,XM_010923433,XM_010923434,XM_019850835,XM_019850836,XM_029264634,XR_002164834,XR_002164835,XR_832018,XR_832019	LOC105045227	tubby-like F-box protein 3, transcript variant X11	protein_coding	XP_010921732.1		178	276	96	158	123962294569929	198719941178897	698970765547731	983234727751016	0.4822	0.664	3516	0.3616	nonDE
105045232	XM_010923438,XM_029264632	LOC105045232	60S ribosomal protein L10a, transcript variant X1	protein_coding	XP_010921740.1		313	273	185	288	217978641575213	196559941818257	134697491277427	17922253265335	-0.006362	0.008193	4167	0.9911	nonDE
105045233	XM_029264920	LOC105045233	nuclear pore complex protein NUP93A	protein_coding	XP_029120753.1	.	211	177	179	177	146944068282332	127439962277771	130328923992754	110147181526538	-0.2163	0.3509	3682	0.5907	nonDE
105045235	XM_010923440	LOC105045235	probable serine/threonine-protein kinase At1g54610	protein_coding	XP_010921742.1	.	66	104	114	69	459635474248052	748799778355266	830027784087931	429387317815317	-0.411	0.3782	2574	0.5667	nonDE
105045237	XM_019850809,XM_029264631	LOC105045237	ISWI chromatin-remodeling complex ATPase CHR11, transcript variant X1	protein_coding	XP_019706368.1		473	562	332	373	329405423211104	404639880226595	241727389751924	232118071804512	0.2095	0.4239	4.88	0.5256	nonDE
105045240	XM_019850830,XM_019850831,XM_029264629,XM_029264630	LOC105045240	DNA polymerase zeta catalytic subunit, transcript variant X1	protein_coding	XP_019706389.1		150	191	132	145	104462607783648	137519959294092	96108480262813	902335667872768	-0.05169	0.06157	3406	0.919	nonDE
105045242	XM_010923452,XM_029264628,XR_002164860,XR_003800912,XR_003800913,XR_832023,XR_832024,XR_832025,XR_832026,XR_832027	LOC105045242	probable GTP-binding protein OBGC1, chloroplastic, transcript variant X2	protein_coding	XP_010921754.1		131	107	39	0	912306774643861	770399771961667	283956873503766	0	4406	0.6752	0.6663	0.3555	nonDE
105045246	XM_010923458,XM_010923459	LOC105045246	potassium transporter 7, transcript variant X1	protein_coding	XP_010921760.1		394	327	286	447	274388449778383	235439930309781	208235040569428	278168305889053	-0.3399	0.6855	4.63	0.3492	nonDE
105045248	XM_010923467,XM_019850713	LOC105045248	cullin-1, transcript variant X1	protein_coding	XP_010921769.1		770	773	817	732	536241386622727	556559835258289	594853245263017	455523937160597	-0.3415	0.8589	5738	0.2763	nonDE
105045249	XM_010923468,XM_010923469	LOC105045249	cullin-1, transcript variant X1	protein_coding	XP_010921770.1		920	924	720	824	640703994406375	665279803077178	524228074160798	512775579535973	-0.08017	0.1636	5863	0.7902	nonDE
105045251	XM_010923470,XM_019850745	LOC105045251	uncharacterized LOC105045251, transcript variant X1	protein_coding	XP_010921772.1		274	347	255	358	190818363551464	249839926047382	185664109598616	222783564895483	-0.3199	0.6019	4.4	0.3939	nonDE
105045259	XM_010923479	LOC105045259	nuclear cap-binding protein subunit 1	protein_coding	XP_010921781.1	.	362	323	297	283	252103093451204	23255993116226	216244080591329	17611103035034	-0.0957	0.1597	4444	0.7957	nonDE
105045262	XM_010923481	LOC105045262	pre-mRNA-splicing factor syf2	protein_coding	XP_010921783.1	.	436	354	277	416	303637979957804	254879924555542	201682189642418	258876991610394	-0.1346	0.2263	4658	0.7205	nonDE
105045269	XM_010923489,XM_029264623,XM_029264624,XR_003800909,XR_003800910	LOC105045269	lysine-specific demethylase JMJ25, transcript variant X2	protein_coding	XP_010921791.1		119	134	209	121	828736688416942	964799714419285	152171760416121	75298355732831	-0.652	0.8945	3296	0.2635	nonDE
105045282	XM_010923512,XM_010923513	LOC105045282	probable histone-arginine methyltransferase CARM1, transcript variant X1	protein_coding	XP_010921814.1		211	200	173	147	146944068282332	143999957376013	125960356708081	914781677084806	0.03444	0.04288	3647	0.9464	nonDE
105045285	XM_029266425,XM_029266427,XM_029266431,XM_029266432,XM_029266434	LOC105045285	uncharacterized LOC105045285, transcript variant X4	protein_coding	XP_029122258.1		124	153	104	174	863557557678158	11015996739265	757218329343375	108280280144732	-0.3277	0.4466	3238	0.5072	nonDE
105045286	XM_010923515	LOC105045286	uncharacterized LOC105045286	protein_coding	XP_010921817.1	.	2050	2152	4353	4587	142765563970986	15494395413659	316939556503049	285449221278096	-1429	3536	7725	0.009168	downReg
105045289	XM_010923521,XM_019850976	LOC105045289	uncharacterized LOC105045289, transcript variant X2	protein_coding	XP_010921823.1		172	199	125	142	119783790258583	143279957589133	910118184306941	883666654054711	0.1308	0.178	3443	0.7747	nonDE
105045291	XM_010923523	LOC105045291	ribosome biogenesis protein NSA2 homolog	protein_coding	XP_010921825.1	.	1385	1110	994	1627	964538078535685	79919976343687	72372598016088	101248284939931	-0.3715	0.7961	6438	0.3	nonDE
105045308	XM_010923543,XM_029264637	LOC105045308	ATP-dependent Clp protease ATP-binding subunit ClpA homolog CD4A, chloroplastic, transcript variant X1	protein_coding	XP_010921845.1		149	138	75	76	103766190398424	993599705894487	546070910584165	472948350057451	0.5894	0.8368	2852	0.2837	nonDE
105045310	XM_010923545	LOC105045310	protein BONZAI 3	protein_coding	XP_010921847.1	.	68	97	122	144	473563821952538	698399793273661	888275347883575	896112663266749	-1055	1649	2848	0.08872	nonDE
105045323	XM_010923560	LOC105045323	elongation factor 1-beta	protein_coding	XP_010921862.1	.	1107	766	973	1057	770934045443324	551519836750128	708435994664523	657771586856218	-0.479	1223	6061	0.1605	nonDE
105045325	XM_010923562	LOC105045325	nucleolar protein 56	protein_coding	XP_010921864.1	.	242	160	118	142	168533007224286	11519996590081	859151565985753	883666654054711	0.2634	0.3726	3467	0.5718	nonDE
105045328	XM_010923565	LOC105045328	probable calcium-transporting ATPase 8, plasma membrane-type	protein_coding	XP_010921867.1	.	217	283	347	349	151122572593678	203759939687058	252648807963607	217182860750066	-0.8293	1949	4344	0.05916	nonDE
105045330	XM_010923570,XR_003800920,XR_832043	LOC105045330	eukaryotic peptide chain release factor subunit 1-3, transcript variant X3	protein_coding	XP_010921872.1	.	439	342	249	226	305727232113477	246239927112982	181295542313943	140639904096031	0.3748	0.7609	4.39	0.3164	nonDE
105045334	XM_010923579,XM_010923587	LOC105045334	V-type proton ATPase subunit G, transcript variant X1	protein_coding	XP_010921881.1		133	159	71	65	926235122348347	11447996611393	516947128686343	404495299391241	0.7693	1018	2786	0.2184	nonDE
105045339	XM_010923581,XR_003800921	LOC105045339	chromatin-remodeling ATPase INO80, transcript variant X2	protein_coding	XP_010921883.1	.	666	690	474	548	463813978559398	496799852947244	345116815489192	341020652409846	0.07108	0.1363	5344	0.8242	nonDE
105045365	XM_010923625	LOC105045365	chaperone protein dnaJ 15	protein_coding	XP_010921927.1	.	184	173	135	85	128140798881275	124559963130251	982927639051497	528955391511623	0.4273	0.5838	3.26	0.406	nonDE
105045366	XM_010923621,XM_010923622,XM_019850794,XM_029264651,XM_029264652	LOC105045366	DDT domain-containing protein PTM, transcript variant X3	protein_coding	XP_010921923.1		200	251	286	155	139283477044864	180719946506896	208235040569428	964565713932959	-0.2357	0.2657	3.91	0.6773	nonDE
105045368	XM_010923627	LOC105045368	uncharacterized protein At2g37660, chloroplastic	protein_coding	XP_010921929.1	.	228	128	129	158	158783163831145	921599727206481	939241966204764	983234727751016	-0.07783	0.08434	3435	0.8912	nonDE
105045376	XM_010923635,XM_010923637	LOC105045376	translation initiation factor IF-2, chloroplastic, transcript variant X1	protein_coding	XP_010921937.1		1685	1776	1102	1142	117346329410298	127871962149899	802360191285	71066712600738	0.2851	0.6944	6588	0.3465	nonDE
105045377	XM_010927282,XM_010934673	LOC105045377	heat shock 70 kDa protein 14, transcript variant X2	protein_coding	XP_010925584.1		152	210	32	0	105855442554097	151199955244813	232990255182577	0	5.13	0.7401	0.8917	0.3249	nonDE
105045383	XM_010923642,XM_029264662,XM_029264663	LOC105045383	mediator of RNA polymerase II transcription subunit 33A, transcript variant X1	protein_coding	XP_010921944.1		249	412	626	567	173407928920856	296639912194586	455787186700916	352844361161282	-1237	2623	4916	0.02532	downReg
105045387	XM_010923650,XM_019850862	LOC105045387	protein FORGETTER 1, transcript variant X1	protein_coding	XP_010921952.1		310	332	304	319	21588938941954	239039929244181	221340742423448	198513846932009	-0.2957	0.6341	4.45	0.376	nonDE
105045391	XM_010923654	LOC105045391	asparagine--tRNA ligase, cytoplasmic 1	protein_coding	XP_010921956.1	.	324	247	133	201	22563923281268	177839947359376	968365748102586	125082392580984	0.4434	0.8143	3896	0.293	nonDE
105045396	XM_010923659	LOC105045396	ABC transporter F family member 4	protein_coding	XP_010921961.1	.	130	149	72	58	905342600791618	107279968245129	524228074160798	360934267149107	0.7952	1007	2719	0.2223	nonDE
105045400	XM_010923666,XM_010923667	LOC105045400	isoleucine--tRNA ligase, cytoplasmic, transcript variant X1	protein_coding	XP_010921968.1		354	355	207	230	24653175436941	255599924342422	15071557132123	143129105938439	0.3594	0.7843	4266	0.3064	nonDE
105045403	XM_010923672	LOC105045403	probable RNA-dependent RNA polymerase SHL2	protein_coding	XP_010921974.1	.	223	202	161	165	155301076905024	145439956949773	117223222138734	102679575999315	0.0441	0.05926	3687	0.9223	nonDE
105045408	XM_010923676,XM_029264661	LOC105045408	eukaryotic translation initiation factor 3 subunit A, transcript variant X2	protein_coding	XP_010921978.1		554	471	430	445	385815231414274	33911989962051	313080655401588	276923704967849	-0.1134	0.2196	5.03	0.7265	nonDE
105045410	XM_010923680	LOC105045410	PAP-specific phosphatase HAL2-like	protein_coding	XP_010921982.1	.	124	157	121	210	863557557678158	11303996654017	880994402409119	130683096726401	-0.55	0.8586	3369	0.2764	nonDE
105045423	XM_010923701,XR_003801755	LOC105045423	zinc finger protein BRUTUS, transcript variant X1	protein_coding	XP_010922003.1	.	658	693	940	787	458242639477603	498959852307884	68440887459882	489750462493702	-0.6878	1865	5718	0.06692	nonDE
105045432	XM_010923708,XM_029264654	LOC105045432	heterogeneous nuclear ribonucleoprotein U-like protein 1, transcript variant X2	protein_coding	XP_010922010.1		156	164	98	153	108641112094994	11807996504833	713532656496642	952119704720921	0.02706	0.02992	3278	0.9646	nonDE
105045437	XM_010923714	LOC105045437	protein RRC1	protein_coding	XP_010922016.1	.	74	108	111	68	515348865065998	777599769830468	808184947664564	423164313209298	-0.2708	0.2404	2613	0.7066	nonDE
105045453	XM_010923730	LOC105045453	gamma carbonic anhydrase 1, mitochondrial	protein_coding	XP_010922032.1	.	212	265	126	191	147640485667556	190799943523217	917399129781397	118859387974965	0.2571	0.3853	3731	0.5594	nonDE
105045454	XM_010923731,XM_010923732,XM_010923733	LOC105045454	stomatal closure-related actin-binding protein 1, transcript variant X1	protein_coding	XP_010922033.1		88	134	233	443	612847298997403	964799714419285	169646029554814	275679104046646	-1925	3012	3693	0.01651	downReg
105045455	XM_010923734	LOC105045455	U3 small nucleolar ribonucleoprotein protein IMP4	protein_coding	XP_010922036.1	.	273	139	105	91	19012194616624	100079970376329	764499274817831	566293419147737	0.674	0.8494	3258	0.2798	nonDE
105045461	XM_010923743,XM_010923746,XM_010923747,XM_010923748,XM_029264666,XR_003800930,XR_832056	LOC105045461	proteasome adapter and scaffold protein ECM29, transcript variant X5	protein_coding	XP_010922045.1		557	551	237	289	387904483569947	396719882570915	172558407744596	179844833113952	0.7386	2031	4718	0.05456	nonDE
105045464	XM_010923752,XM_010923754,XM_010923755,XM_010923756,XM_010923757	LOC105045464	hydroxymethylglutaryl-CoA lyase, mitochondrial, transcript variant X1	protein_coding	XP_010922054.1		124	78	109	96	863557557678158	561599833766449	793623056715653	597408442177833	-0.3704	0.4333	2799	0.5186	nonDE
105045476	XM_010923774	LOC105045476	F-box protein At2g32560	protein_coding	XP_010922076.1	.	119	161	50	118	828736688416942	11591996568769	364047273722777	734314543510253	0.4507	0.4609	2839	0.4953	nonDE
105045477	XM_010923793,XM_029266381,XM_029266384,XR_003801721	LOC105045477	chloroplastic group IIA intron splicing facilitator CRS1, chloroplastic, transcript variant X2	protein_coding	XP_010922095.1		546	436	191	292	380243892332479	313919907079708	139066058562101	181711734495757	0.6992	1629	4553	0.09142	nonDE
105045483	XM_010923778,XM_019850780,XM_019850781	LOC105045483	phosphatidylinositol 3,4,5-trisphosphate 3-phosphatase and protein-tyrosine-phosphatase PTEN2A, transcript variant X1	protein_coding	XP_010922080.1		184	202	230	240	128140798881275	145439956949773	167461745912477	149352110544458	-0.6233	1383	3881	0.1283	nonDE
105045485	XM_010923819,XR_832082	LOC105045485	WD repeat-containing protein 11, transcript variant X2	protein_coding	XP_010922121.1	.	352	316	439	431	245138919598961	2275199326541	319633506328598	268211498519423	-0.7188	1969	4719	0.05795	nonDE
105045488	XM_010923781	LOC105045488	ERI1 exoribonuclease 2	protein_coding	XP_010922083.1	.	132	122	164	247	919270948496104	878399739993677	119407505781071	153708213768672	-1009	2023	3468	0.05507	nonDE
105045489	XM_010923782	LOC105045489	dihydropyrimidinase	protein_coding	XP_010922084.1	.	345	289	207	269	240263997902391	208079938408338	15071557132123	167398823901914	0.07778	0.1204	4239	0.8458	nonDE
105045490	XM_010923783	LOC105045490	splicing factor 3B subunit 6-like protein	protein_coding	XP_010922085.1	.	169	167	97	171	11769453810291	120239964408971	706251711022187	106413378762926	0.02077	0.02223	3349	0.973	nonDE
105045494	XM_010923788	LOC105045494	transcription factor TGA2.3	protein_coding	XP_010922090.2	.	202	185	205	163	140676311815313	133199960572812	149259382226338	101434975078111	-0.2498	0.3856	3702	0.5594	nonDE
105045497	XM_010923791,XM_019850802	LOC105045497	myb family transcription factor PHL7, transcript variant X2	protein_coding	XP_010922093.1		115	72	98	113	800879993007969	518399846553645	713532656496642	703199520480157	-0.5381	0.7032	2764	0.3427	nonDE
105045498	XM_010923792	LOC105045498	leucine-rich repeat protein 1	protein_coding	XP_010922094.1	.	128	120	102	95	891414253087131	863999744256076	742656438394464	591185437571813	0.003516	0.003491	2937	0.9961	nonDE
105045500	XM_010923797,XM_019850614,XM_029264668	LOC105045500	protein ZINC INDUCED FACILITATOR-LIKE 1, transcript variant X1	protein_coding	XP_010922099.1		337	283	110	175	234692658820596	203759939687058	800904002190108	108902580605334	0.7989	1656	3841	0.08802	nonDE
105045501	XM_010923799	LOC105045501	ribonuclease III domain-containing protein RNC1, chloroplastic	protein_coding	XP_010922101.1	.	192	203	51	67	13371213796307	146159956736653	371328219197232	416941308603279	1382	1821	2899	0.07061	nonDE
105045502	XM_010923800,XM_010923801,XM_010923802	LOC105045502	SNF1-related protein kinase regulatory subunit beta-1, transcript variant X1	protein_coding	XP_010922102.1		48	18	320	450	334280344907674	129599961638411	232990255182577	280035207270859	-3973	1975	2881	0.05777	nonDE
105045506	XM_010923810	LOC105045506	calmodulin-7	protein_coding	XP_010922112.2	.	669	687	424	796	465903230715071	494639853586603	308712088116915	495351166639119	-0.1233	0.1862	5438	0.7639	nonDE
105045507	XM_010923811,XM_010923813,XM_010923814,XM_010923816,XM_029264671,XM_029264672,XM_029264673,XM_029264674	LOC105045507	CBL-interacting protein kinase 32, transcript variant X4	protein_coding	XP_010922113.1		1009	1040	1165	1172	70268514169134	748799778355266	848230147774069	729336139825437	-0.5305	1571	6.24	0.09845	nonDE
105045509	XM_019850704,XR_002164809	LOC105045509	dnaJ homolog subfamily C member 2, transcript variant X2	protein_coding	XP_019706263.1	.	510	592	627	599	355172866464404	426239873832997	456515281248362	372757975900543	-0.496	1303	5325	0.1435	nonDE
105045512	XM_010923822	LOC105045512	proteasome subunit alpha type-3	protein_coding	XP_010922124.1	.	206	229	83	82	14346198135621	164879951195534	604318474379809	510286377693565	1059	1836	3214	0.06933	nonDE
105045513	XM_010923823,XM_029264676	LOC105045513	glutamine--fructose-6-phosphate aminotransferase [isomerizing] 2, transcript variant X2	protein_coding	XP_010922125.1		482	498	665	791	335673179678123	358559893866271	484182874051293	49223966433611	-0.9059	2784	5364	0.02094	downReg
105045517	XM_010923830,XM_019850882,XM_029264678	LOC105045517	alpha-L-arabinofuranosidase 1, transcript variant X3	protein_coding	XP_010922132.2		473	322	296	229	329405423211104	23183993137538	215515986043884	142506805477837	0.2575	0.4048	4462	0.5425	nonDE
105045520	XM_019850815	LOC105045520	histone-lysine N-methyltransferase, H3 lysine-9 specific SUVH1	protein_coding	XP_019706374.1	.	232	202	146	180	161568833372043	145439956949773	106301803927051	112014082908344	0.07484	0.1047	3697	0.8643	nonDE
105045535	XM_010923845	LOC105045535	villin-2	protein_coding	XP_010922147.1	.	394	457	613	680	274388449778383	329039902604189	446321957584124	423164313209298	-0.9458	2737	5177	0.02223	downReg
105045536	XM_010923846,XM_010923847,XM_010923850,XM_010923851,XR_003800932,XR_832077	LOC105045536	pentatricopeptide repeat-containing protein At2g41720, transcript variant X1	protein_coding	XP_010922148.1		221	145	88	85	153908242134575	104399969097609	640723201752087	528955391511623	0.7201	1055	3109	0.2065	nonDE
105045538	XM_010923852	LOC105045538	ABC transporter A family member 1	protein_coding	XP_010922154.1	.	1415	1564	809	1163	985430600092414	112607966668042	589028488883453	72373543568002	0.2794	0.6233	6374	0.3814	nonDE
105045541	XM_010923858,XM_010923862,XM_029264679,XM_029264680,XM_029264681	LOC105045541	protein LNK2, transcript variant X1	protein_coding	XP_010922160.1		482	372	355	781	335673179678123	267839920719383	258473564343171	486016659730091	-0.6624	1152	5028	0.1783	nonDE
105045545	XM_010923868,XM_010923871,XM_029264682	LOC105045545	probable magnesium transporter NIPA3, transcript variant X1	protein_coding	XP_010922170.1		146	203	268	223	101676938242751	146159956736653	195129338715408	138773002714226	-0.8403	1615	3828	0.09317	nonDE
105045546	XM_010923872,XR_003800935	LOC105045546	L-galactono-1,4-lactone dehydrogenase 2, mitochondrial, transcript variant X2	protein_coding	XP_010922174.1	.	148	102	88	35	1030697730132	734399782617664	640723201752087	217805161210668	0.9933	0.8761	2521	0.2695	nonDE
105045547	XM_010923874	LOC105045547	DEAD-box ATP-dependent RNA helicase 10	protein_coding	XP_010922176.1	.	127	111	104	156	884450079234888	79919976343687	757218329343375	970788718538978	-0.4521	0.6924	3092	0.3467	nonDE
105045548	XM_010923876,XM_010923877,XM_010923878,XR_832080,XR_832081	LOC105045548	pre-mRNA-splicing factor CWC22 homolog, transcript variant X3	protein_coding	XP_010922178.1		242	240	266	247	168533007224286	172799948851215	193673149620517	153708213768672	-0.423	0.8835	4104	0.2671	nonDE
105045554	XM_010923886	LOC105045554	zerumbone synthase	protein_coding	XP_010922188.1	.	367	328	80	163	255585180377326	236159930096661	582475637956443	101434975078111	1228	2299	3785	0.03873	upReg
105045555	XM_010923888,XM_029264684	LOC105045555	triacylglycerol lipase SDP1, transcript variant X2	protein_coding	XP_010922190.1		190	172	109	168	132319303192621	123839963343371	793623056715653	104546477381121	0.06375	0.07772	3437	0.8995	nonDE
105045561	XM_010923893	LOC105045561	structural maintenance of chromosomes protein 5	protein_coding	XP_010922195.1	.	229	299	198	191	15947958121637	215279936277139	14416272039422	118859387974965	0.08762	0.1181	3964	0.8474	nonDE
105045562	XM_010923895	LOC105045562	protein RETICULATA-RELATED 4, chloroplastic	protein_coding	XP_010922197.1	.	851	634	199	237	592651194825897	45647986488196	144890814941665	147485209162652	1416	3482	4787	0.009583	upReg
105045570	XM_029264688	LOC105045570	suppressor of mec-8 and unc-52 protein homolog 2	protein_coding	XP_029120521.1	.	478	415	214	307	332887510137226	298799911555226	155812233153348	191046241404786	0.4504	1026	4546	0.216	nonDE
105045571	XM_010923908	LOC105045571	DNA-directed RNA polymerase I subunit 1	protein_coding	XP_010922210.1	.	288	230	111	78	200568206944605	165599950982415	808184947664564	485394359269489	1155	1996	3423	0.05664	nonDE
105045574	XM_010923910,XM_029264689	LOC105045574	RNA polymerase sigma factor sigD, chloroplastic, transcript variant X1	protein_coding	XP_010922212.1		254	224	56	56	176890015846978	161279952261134	40773294656951	348488257937069	1765	2265	3004	0.04059	upReg
105045577	XM_010923917,XM_019850910,XM_019850911,XR_832086	LOC105045577	uncharacterized LOC105045577, transcript variant X1	protein_coding	XP_010922219.1		105	129	67	167	731238254485537	928799725075281	487823346788521	103924176920519	-0.2543	0.2417	2944	0.7051	nonDE
105045579	XM_010923920	LOC105045579	magnesium-chelatase subunit ChlD, chloroplastic	protein_coding	XP_010922222.1	.	831	746	501	430	578722847121411	537119841012527	364775368270222	267589198058821	0.4277	1069	5384	0.2021	nonDE
105045583	XM_010923931	LOC105045583	cytochrome c-type biogenesis ccda-like chloroplastic protein 2	protein_coding	XP_010922233.1	.	149	119	72	150	103766190398424	856799746387275	524228074160798	933450690902863	-0.01582	0.01411	3028	0.9836	nonDE
105045587	XM_010923934,XM_010923935,XM_010923936	LOC105045587	probable glycerol-3-phosphate dehydrogenase [NAD(+)] 1, cytosolic, transcript variant X2	protein_coding	XP_010922236.1		101	135	116	92	703381559076564	971999712288085	844589675036842	572516423753756	-0.1505	0.156	2929	0.8001	nonDE
105045588	XM_010923937,XM_019850968,XM_029264692	LOC105045588	probable calcium-transporting ATPase 9, plasma membrane-type, transcript variant X1	protein_coding	XP_010922239.1		407	292	562	513	283441875786299	210239937768978	409189135664401	319240136288779	-0.9717	2466	4894	0.03128	downReg
105045596	XM_010923945	LOC105045596	pheophytinase, chloroplastic	protein_coding	XP_010922247.1	.	389	272	137	180	270906362852261	195839942031377	997489530000408	112014082908344	0.7069	1453	3967	0.1162	nonDE
105045598	XM_010923948	LOC105045598	transcription elongation factor SPT6 homolog	protein_coding	XP_010922250.1	.	1050	1167	621	330	731238254485537	840239751289034	452146713963688	20535915199863	0.9645	1754	5612	0.07647	nonDE
105045628	XM_010923982	LOC105045628	pumilio homolog 2	protein_coding	XP_010922284.1	.	189	177	126	138	131622885807397	127439962277771	917399129781397	858774635630634	0.1328	0.187	3427	0.7629	nonDE
105045643	XM_010923994	LOC105045643	uncharacterized protein At2g37660, chloroplastic	protein_coding	XP_010922296.1	.	112	107	53	8	77998747145124	770399771961667	385890110146143	0.497840368481527	2186	0.6613	1741	0.3629	nonDE
105045647	XM_010924000,XM_029264855,XM_029264856	LOC105045647	telomere repeat-binding protein 2, transcript variant X2	protein_coding	XP_010922302.1		137	173	320	258	95409181775732	124559963130251	232990255182577	160553518835293	-1232	2509	3864	0.02929	downReg
105045651	XM_010924005	LOC105045651	ribonuclease II, chloroplastic/mitochondrial	protein_coding	XP_010922307.1	.	438	332	176	181	305030814728253	239039929244181	128144640350417	112636383368946	0.7582	1752	4174	0.07647	nonDE
105045657	XM_010924017	LOC105045657	receptor-like cytoplasmic kinase 176	protein_coding	XP_010922319.1	.	100	198	247	235	696417385224321	142559957802253	179839353219052	146240608241449	-1.12	1852	3672	0.06765	nonDE
105045658	XM_010924018,XM_010924019	LOC105045658	triosephosphate isomerase, cytosolic, transcript variant X1	protein_coding	XP_010922320.1		1159	742	359	357	807147749474988	534239841865007	261385942532954	222161264434881	1035	2494	5315	0.0299	upReg
105045662	XM_010924026,XR_003800988	LOC105045662	transcription factor MYB3R-3, transcript variant X1	protein_coding	XP_010922328.1	.	54	85	113	183	376065388021133	611999818848054	822746838613475	113880984290149	-1456	1.96	2777	0.05827	nonDE
105045664	XM_010924027,XR_832101	LOC105045664	glucan endo-1,3-beta-glucosidase, transcript variant X2	protein_coding	XP_010922329.1	.	20	20	102	124	139283477044864	143999957376013	742656438394464	771652571146367	-2807	0.9144	1732	0.2555	nonDE
105045683	XM_010924046,XM_010924047,XM_010924048	LOC105045683	60S ribosomal protein L36-3, transcript variant X3	protein_coding	XP_010922348.1		187	123	58	66	130230051036948	885599737862478	422294837518421	41071830399726	0.9528	1133	2.75	0.1834	nonDE
105045690	XM_010924055	LOC105045690	heat shock cognate 70 kDa protein 2	protein_coding	XP_010922357.1	.	2707	2467	1220	1518	188520186180224	177623947423312	888275347883575	944652099193698	0.5867	1587	7017	0.09673	nonDE
105045696	XM_019850677	LOC105045696	probable mediator of RNA polymerase II transcription subunit 37c	protein_coding	XP_019706236.1	.	8268	6061	877	1026	575797894103469	436391870828006	63853891810975	638480272577559	2559	5357	7483	0.001432	upReg
[truncated: 2,592 more rows]

## Sheet: exclusive_genes_leaf_matrix
Table 2. Exclusive genes in the leaves of each matrix (UFES_250 and SM).
[truncated: 370 more rows]

[truncated: 4 more sheets: 678_DEGs, GO_DEG, Top_50DEG, GO_nonDE]
