# Supplementary material for: Conserved stress-responsive genes involved in the early development of Euterpe edulis
Source: Research Square preprint supplement (doi:10.21203/rs.3.rs-5678569/v1), 2025-05-05
Supplement: Supplementary file 3 [file a9c536b202b8ab8b15e2eb98.xlsx]

## Sheet: 6052_after_filter_cpm
Table 1. Expression profile of mapped genes after normalization with the Counts Per Million (CPM) method for root tissue.
Gene_ID	Transcript_ID	Gene_Symbol	Description	gene_biotype	Protein_ID	locus_tag	UFES_250RP1	UFES_250RP2	SMRP1	SMRP2	UFES_250RP1_CPM	UFES_250RP2_CPM	SMRP1_CPM	SMRP2_CPM	logFC	negLog10PValue	logCPM	AdjPValue	status
12079378	gene-ElguCp012	atpF	ATP synthase CF0 subunit I	protein_coding	YP_006073090.1	ElguCp012	17987	20782	13064	12947	488713827039267	453292170164075	360434828312012	383808936845984	0.2501	0.541	12.03	0.49	nonDE
12079379	gene-ElguCp014	atpI	ATP synthase CF0 subunit IV	protein_coding	YP_006073092.1	ElguCp014	7732	9685	4703	4942	210081464984022	211246976616258	129755434595177	146503727959593	0.521	1392	10.74	0.1601	nonDE
12079380	gene-ElguCp015	rps2	ribosomal protein S2	protein_coding	YP_006073093.1	ElguCp015	3830	4949	3081	3081	104062598407761	107946441639015	850045702716863	913350841447808	0.1757	0.3864	9917	0.606	nonDE
12079382	gene-ElguCp020	petN	cytochrome b6/f complex subunit VIII	protein_coding	YP_006073097.1	ElguCp020	1514	1444	565	643	41135972320979	314961935192438	155883097057782	190614927312866	0.9753	2372	7961	0.05316	nonDE
12079385	rna-ElguCp023	trnY-GUA	tRNA-Tyr	tRNA	.	ElguCp023	112	157	71	98	30430838176682	342444763332498	195888493647833	290517307568598	0.3686	0.4852	4802	0.5268	nonDE
12079388	gene-ElguCp026	psbD	photosystem II protein D2	protein_coding	YP_006073099.1	ElguCp026	3100	2287	1438	1641	842282128104591	49883514251046	396743174458568	486468267061296	0.4754	0.8266	9.06	0.3312	nonDE
12079390	gene-ElguCp029	psbZ	photosystem II protein Z	protein_coding	YP_006073101.1	ElguCp029	755	623	330	451	205136453780312	135887316914743	91046764653218	133697250727998	0.5002	0.8376	7086	0.3263	nonDE
12079391	gene-ElguCp034	psaA	photosystem I P700 apoprotein A1	protein_coding	YP_006073104.1	ElguCp034	11411	10233	6337	8437	310041334316177	223199825680347	174837378062861	250111686117986	0.2427	0.3729	11.2	0.6156	nonDE
12079392	gene-ElguCp035	ycf3	photosystem I assembly protein ycf3	protein_coding	YP_006073105.1	ElguCp035	6914	6908	3646	3639	187856084958553	150675695866299	100592879977465	107876783902258	0.6029	1532	10.37	0.1352	nonDE
12079393	gene-ElguCp037	rps4	ribosomal protein S4	protein_coding	YP_006073106.1	ElguCp037	1188	1619	712	878	322784247802662	35313252983141	196440292221489	260279791882887	0.4905	1202	8111	0.2039	nonDE
12079395	gene-ElguCp041	ndhJ	NADH dehydrogenase subunit J	protein_coding	YP_006073107.1	ElguCp041	1215	1590	613	737	330120253434541	346807117005523	169126262825523	218480873140875	0.7285	1935	7995	0.08416	nonDE
12079396	gene-ElguCp042	ndhK	NADH dehydrogenase subunit K	protein_coding	YP_006073108.1	ElguCp042	2478	2732	1735	1807	673282294659089	595897511735277	478685262646465	53567834160863	0.2337	0.5237	9146	0.504	nonDE
12079397	gene-ElguCp043	ndhC	NADH dehydrogenase subunit 3	protein_coding	YP_006073109.1	ElguCp043	1213	1396	729	853	329576845609958	304492286377177	201130580097563	252868636077566	0.4025	0.9721	8063	0.2761	nonDE
12079399	gene-ElguCp049	accD	acetyl-CoA carboxylase carboxyltransferase beta subunit	protein_coding	YP_006073113.1	ElguCp049	34346	29501	13902	20579	933194257157428	643468978539619	383555188548193	610056701270835	0.5913	0.9743	12.58	0.2752	nonDE
12079400	gene-ElguCp050	psaI	photosystem I subunit VIII	protein_coding	YP_006073114.1	ElguCp050	4502	4203	1701	1965	12232110131377	916748624386299	469304686894315	582516846298261	0.9299	2216	9.54	0.06243	nonDE
12079401	gene-ElguCp051	ycf4	photosystem I assembly protein Ycf4	protein_coding	YP_006073115.1	ElguCp051	2712	2772	1912	2435	736861010135371	604622219081328	527519436415009	721846575438303	0.02394	0.03329	9326	0.9605	nonDE
12079402	gene-ElguCp054	psbJ	photosystem II protein J	protein_coding	YP_006073118.1	ElguCp054	2838	3615	2480	2442	771095703084138	78849542639935	684230231333275	723921699063793	0.05739	0.1078	9533	0.8811	nonDE
12079403	gene-ElguCp055	psbL	photosystem II protein L	protein_coding	YP_006073119.1	ElguCp055	2452	2786	2168	2325	666217992939502	607675866652445	59814965384296	689237489894889	-0.1028	0.194	9.32	0.7807	nonDE
12079404	gene-ElguCp056	psbF	photosystem II cytochrome b559 beta subunit	protein_coding	YP_006073120.1	ElguCp056	3823	4770	3595	3755	103872405669156	104042135101657	991857936146421	111315560195927	-0.106	0.2052	10.03	0.7698	nonDE
12079405	gene-ElguCp057	psbE	photosystem II cytochrome b559 alpha subunit	protein_coding	YP_006073121.1	ElguCp057	7825	9958	8009	7898	212608311368336	217201589379937	220967738820492	234133234201713	-0.1724	0.3636	11.11	0.6246	nonDE
12079406	gene-ElguCp058	petL	cytochrome b6/f complex subunit VI	protein_coding	YP_006073122.1	ElguCp058	1558	1422	1085	918	42331469535063	31016334615211	299350726208308	272137641171401	0.255	0.518	8.33	0.5071	nonDE
12079407	gene-ElguCp059	petG	cytochrome b6/f complex subunit V	protein_coding	YP_006073123.1	ElguCp059	3592	4256	2861	2295	975960452952158	928308861619816	789347859614718	680344102928503	0.2882	0.7108	9706	0.3857	nonDE
12079408	rna-ElguCp060	trnW-CCA	tRNA-Trp	tRNA	.	ElguCp060	140	145	122	97	380385477208525	316270641294345	336597129930079	28755284524647	0.03933	0.04509	5044	0.9486	nonDE
12079410	gene-ElguCp062	psaJ	photosystem I subunit IX	protein_coding	YP_006073124.1	ElguCp062	4062	4639	2531	2625	110366129172931	101184793445825	6983010949615	778171359558746	0.4298	1118	9786	0.2286	nonDE
12079411	gene-ElguCp063	rpl33	50S ribosomal protein L33	protein_coding	YP_006073125.1	ElguCp063	1752	1758	1037	1222	47602525433524	383450887858937	286107560440567	362257295764109	0.319	0.6661	8535	0.4116	nonDE
12079412	gene-ElguCp064	rps18	ribosomal protein S18	protein_coding	YP_006073126.1	ElguCp064	3958	3789	2206	2634	107540408485096	826447903354672	608633826742421	780839375648661	0.363	0.7305	9655	0.3743	nonDE
12079413	gene-ElguCp065	rpl20	ribosomal protein L20	protein_coding	YP_006073127.1	ElguCp065	1135	1521	1060	1165	308383940451197	331756996833586	292453244037609	345359860527977	-0.08122	0.153	8317	0.8274	nonDE
12079414	gene-ElguCp127	rps12	ribosomal protein S12	protein_coding	YP_006073128.1	ElguCp127	4996	5188	3343	3017	135743274580985	11315945427828	922331315865782	894378282586185	0.3599	0.8741	10.05	0.3106	nonDE
12079415	gene-ElguCp066	clpP	clp protease proteolytic subunit	protein_coding	YP_006073129.1	ElguCp066	44487	59183	29747	26676	120872919461255	129088588715333	820717608527054	790799969051013	0.5423	1396	13.29	0.1593	nonDE
12079416	gene-ElguCp069	psbN	photosystem II protein N	protein_coding	YP_006073132.1	ElguCp069	504	342	199	213	136938771795069	745962478087352	549039580787588	631430474613382	0.6716	1052	6272	0.2472	nonDE
12079417	gene-ElguCp070	psbH	photosystem II phosphoprotein	protein_coding	YP_006073133.1	ElguCp070	631	512	411	375	171445168656128	111676254029452	113394606886281	111167337079821	0.1978	0.3082	6963	0.6705	nonDE
12079418	gene-ElguCp071	petB	cytochrome b6	protein_coding	YP_006073134.1	ElguCp071	15184	18538	10103	9758	412555220423874	404346561952729	278741049482261	289272233393304	0.4344	1117	11.73	0.2286	nonDE
12079419	gene-ElguCp072	petD	cytochrome b6/f complex subunit IV	protein_coding	YP_006073135.1	ElguCp072	5862	6439	4437	4013	159272833385455	140445976503054	122416513565554	118963872987019	0.2206	0.4878	10.39	0.5255	nonDE
12079420	gene-ElguCp074	rps11	ribosomal protein S11	protein_coding	YP_006073137.1	ElguCp074	8112	9578	7128	6943	220406213651111	208913117401189	196661011650951	205822619025386	0.003253	0.00523	11.02	0.9939	nonDE
12079421	gene-ElguCp075	rpl36	ribosomal protein L36	protein_coding	YP_006073138.1	ElguCp075	2014	2344	1528	1654	547211679355692	511267850478583	421574110273082	490322068080063	0.1285	0.255	8938	0.7192	nonDE
12079422	gene-ElguCp076	infA	translational initiation factor 1	protein_coding	YP_006073139.1	ElguCp076	5460	5876	3928	4428	148350336111325	128165950913488	108373239866012	131266391623852	0.1195	0.2103	10.32	0.7644	nonDE
12079423	gene-ElguCp077	rps8	ribosomal protein S8	protein_coding	YP_006073140.1	ElguCp077	8709	9738	6809	7325	236626937214932	212403000339609	18785982440114	217146865095917	0.06094	0.1014	11.06	0.8885	nonDE
12079424	gene-ElguCp078	rpl14	ribosomal protein L14	protein_coding	YP_006073141.1	ElguCp078	8555	9470	6300	7060	232442696965638	206557446417755	173816550701598	209291039942276	0.1105	0.1922	11	0.783	nonDE
12079425	gene-ElguCp079	rpl16	50S ribosomal protein L16	protein_coding	YP_006073142.1	ElguCp079	14186	15025	10819	11428	385439169977152	327721819686037	298495438419141	338778754172851	0.07145	0.1164	11.72	0.8723	nonDE
12079426	gene-ElguCp080	rps3	ribosomal protein S3	protein_coding	YP_006073143.1	ElguCp080	18313	18387	12953	13426	49757137457998	401052984929595	357372346228222	39800871136898	0.1558	0.2746	12	0.7002	nonDE
12079427	gene-ElguCp081	rpl22	50S ribosomal protein L22	protein_coding	YP_006073144.1	ElguCp081	4442	5319	3298	3661	120690877840019	116016795934112	909915847958525	108528965613126	0.1613	0.3199	10.08	0.6603	nonDE
12079428	gene-ElguCp082	rps19	ribosomal protein S19	protein_coding	YP_006073145.1	ElguCp082	2860	2881	2864	3435	777073189154558	628397046599316	790175557475201	101829280765116	-0.4493	0.9886	9629	0.2698	nonDE
12079429	rna-ElguCp083	trnH-GUG	tRNA-His	tRNA	.	ElguCp083	352	335	397	432	956397771267148	730694240231763	10953201687069	128064772315954	-0.5977	1324	6639	0.1758	nonDE
12079430	gene-ElguCp084	rpl2	ribosomal protein L2	protein_coding	YP_006073146.1	ElguCp084	6996	7314	8258	9104	190084057039346	159531273822541	227837631062507	269884649806584	-0.5992	1469	11.02	0.1453	nonDE
12079431	gene-ElguCp085	rpl23	ribosomal protein L23	protein_coding	YP_006073147.1	ElguCp085	1809	2014	1730	1892	491512377335872	439289014873663	477305766212325	560876271346723	-0.2449	0.5435	8938	0.4884	nonDE
12079433	gene-ElguCp087	ycf2	hypothetical protein RF2	protein_coding	YP_006073148.1	ElguCp087	10216	11315	6280	7177	277572716797306	246800159051415	173264752127942	212759460859166	0.3573	0.7853	11.13	0.349	nonDE
12079436	gene-ElguCp090	ndhB	NADH dehydrogenase subunit 2	protein_coding	YP_006073149.1	ElguCp090	3662	3594	3246	2680	994979726812584	783914955042674	895569085043472	794475902330453	-0.02091	0.03251	9754	0.9611	nonDE
12079440	rna-ElguCp097	trnA-UGC	tRNA-Ala	tRNA	.	ElguCp097	288	184	250	0	782507267400394	401336537918342	689748217069834	0	3872	1.14	3745	0.2223	nonDE
12079442	rna-ElguCp009	trnG-UCC	tRNA-Gly	tRNA	.	ElguCp009	245	323	94	118	665674585114919	70452011819361	259345329618257	349806554011169	1106	2227	5.51	0.06151	nonDE
12079443	gene-ElguCp104	ndhF	NADH dehydrogenase subunit 5	protein_coding	YP_006073151.1	ElguCp104	3536	3081	2648	2459	960745033863817	672020583329571	730581311520368	728961285011412	0.05242	0.07789	9581	0.9117	nonDE
12079444	gene-ElguCp111	ndhG	NADH dehydrogenase subunit 6	protein_coding	YP_006073157.1	ElguCp111	1580	1716	1070	886	429292181421049	374289945145584	295212236905889	26265136174059	0.4357	1181	8385	0.2097	nonDE
12079445	gene-ElguCp112	ndhI	NADH dehydrogenase subunit I	protein_coding	YP_006073158.1	ElguCp112	1734	2006	1565	1143	471134583913987	437544073404453	431782383885716	338838043419294	0.1579	0.3255	8703	0.655	nonDE
12079446	gene-ElguCp113	ndhA	NADH dehydrogenase subunit 1	protein_coding	YP_006073159.1	ElguCp113	7082	8504	4419	4041	192420710685055	185487278177042	121919894849264	119793922437215	0.5548	1567	10.56	0.1295	nonDE
12079447	gene-ElguCp115	rps15	ribosomal protein S15	protein_coding	YP_006073161.1	ElguCp115	1149	1297	658	745	312187795223282	282898635695701	18154173073278	220852442998577	0.482	1228	7931	0.1983	nonDE
12079448	gene-ElguCp116	ycf1	hypothetical protein RF1	protein_coding	YP_006073162.1	ElguCp116	18015	16458	9451	10856	489474597993684	358978083753264	26075241598108	321822029690276	0.4451	0.8852	11.77	0.3068	nonDE
12079454	rna-ElguCp122	trnA-UGC	tRNA-Ala	tRNA	.	ElguCp122	287	186	253	447	779790228277476	405698891591367	698025195674672	132511465799146	-0.8843	1148	6203	0.2198	nonDE
12079455	rna-ElguCp123	trnI-GAU	tRNA-Ile	tRNA	.	ElguCp123	0	283	365	561	0	617273044733101	100703239692196	166306336271412	-5235	1687	4276	0.1106	nonDE
12079457	gene-ElguCp011	atpA	ATP synthase CF1 alpha subunit	protein_coding	YP_006073089.1	ElguCp011	17534	21076	15174	11830	476405639812448	459704830063422	418649577832706	350695892707808	0.1995	0.4093	12.05	0.5866	nonDE
12079458	gene-ElguCp013	atpH	ATP synthase CF0 subunit III	protein_coding	YP_006073091.1	ElguCp013	4508	5744	3910	3571	122484123661145	125286797489291	107876621149722	105860949523211	0.1229	0.2552	10.17	0.7192	nonDE
12079459	gene-ElguCp016	rpoC2	RNA polymerase beta' subunit	protein_coding	YP_006073094.1	ElguCp016	16194	21368	13953	15421	439997315565347	466073866426039	384962274911016	457149734695444	0.01911	0.02931	12.09	0.965	nonDE
12079460	gene-ElguCp017	rpoC1	RNA polymerase beta subunit	protein_coding	YP_006073095.1	ElguCp017	22629	29280	15887	16597	614838783125122	638648577730926	438321196983538	492011811603676	0.3414	0.7868	12.4	0.3485	nonDE
12079461	gene-ElguCp018	rpoB	RNA polymerase beta subunit	protein_coding	YP_006073096.1	ElguCp018	7846	7983	6026	6877	213178889584149	174123346858811	166256910242513	203866073892781	-0.02347	0.034	10.88	0.9602	nonDE
12079462	gene-ElguCp027	psbC	photosystem II CP43 chlorophyll apoprotein	protein_coding	YP_006073100.1	ElguCp027	4419	3932	2339	2939	120065958841748	857638732116804	645328431890536	871255476473582	0.3482	0.6246	9769	0.4375	nonDE
12079465	gene-ElguCp032	rps14	ribosomal protein S14	protein_coding	YP_006073102.1	ElguCp032	5676	5244	2191	2573	154219140616828	114380913306727	604495337440002	762756155483677	0.8791	2.04	9891	0.07532	nonDE
12079466	gene-ElguCp033	psaB	photosystem I P700 apoprotein A2	protein_coding	YP_006073103.1	ElguCp033	17854	15241	8023	11080	485100165005786	332433161652905	221353997822051	328462425291844	0.4866	0.8201	11.68	0.3338	nonDE
12079469	rna-ElguCp039	trnL-UAA	tRNA-Leu	tRNA	.	ElguCp039	392	565	174	229	106507933618387	123236491262969	480064759080604	678861871767439	0.9242	2071	6.34	0.07312	nonDE
12079470	rna-ElguCp044	trnV-UAC	tRNA-Val	tRNA	.	ElguCp044	683	1048	382	490	185573772095302	228587332466534	105393527568271	145258653784299	0.6518	1515	7.32	0.1369	nonDE
12079471	gene-ElguCp046	atpE	ATP synthase CF1 epsilon subunit	protein_coding	YP_006073110.1	ElguCp046	4212	4401	2882	3392	114441687857308	959935925749251	795141744638104	100554561966601	0.1396	0.2425	9919	0.732	nonDE
12079472	gene-ElguCp047	atpB	ATP synthase CF1 beta subunit	protein_coding	YP_006073111.1	ElguCp047	17873	20925	13039	13930	48561640243914	456411253040288	359745080094942	412949601472508	0.1986	0.3937	12.06	0.6004	nonDE
12079473	gene-ElguCp048	rbcL	ribulose bisophosphate carboxylase	protein_coding	YP_006073112.1	ElguCp048	106103	105398	62703	85027	288286002058972	229891676214768	172997129819719	252059337863625	0.2102	0.3068	14.5	0.6716	nonDE
12079474	gene-ElguCp052	cemA	envelope membrane protein	protein_coding	YP_006073116.1	ElguCp052	2125	2009	1281	1824	577370813620082	438198426455407	353426986426583	540717927556248	0.1136	0.1555	8874	0.8256	nonDE
12079475	gene-ElguCp053	petA	cytochrome f	protein_coding	YP_006073117.1	ElguCp053	6093	6262	4247	4902	165549193759396	136585293502427	117174427115823	145317943030742	0.1152	0.1922	10.45	0.783	nonDE
12079476	gene-ElguCp067	psbB	photosystem II CP47 chlorophyll apoprotein	protein_coding	YP_006073130.1	ElguCp067	11886	10534	8140	8087	322947270150038	229765167958251	224582019477938	239736067990536	0.1442	0.2336	11.3	0.7416	nonDE
12079477	gene-ElguCp068	psbT	photosystem II protein T	protein_coding	YP_006073131.1	ElguCp068	442	312	240	239	120093129232977	68052717299197	66215828838704	708506494988725	0.294	0.4077	6301	0.5883	nonDE
12079478	gene-ElguCp091	rps7	ribosomal protein S7	protein_coding	YP_006073150.1	ElguCp091	9459	9743	5814	5336	257004730636817	212512059181435	160407845361761	15818370950878	0.4647	1156	10.91	0.2173	nonDE
12079479	rna-ElguCp095	trnI-GAU	tRNA-Ile	tRNA	.	ElguCp095	0	281	364	554	0	612910691060076	100427340405368	164231212645922	-5.23	1.69	4268	0.1102	nonDE
12079485	gene-ElguCp105	rpl32	ribosomal protein L32	protein_coding	YP_006073152.1	ElguCp105	2417	1391	781	802	656708356009289	30340169795892	215477343012616	23774987823471	0.8948	1.41	8313	0.1556	nonDE
12079487	gene-ElguCp107	ccsA	cytochrome c heme attachment protein	protein_coding	YP_006073153.1	ElguCp107	4545	4140	1261	1229	123489428136625	903007210316268	347909000690024	364332419389599	1481	3567	9.26	0.01779	upReg
12079488	gene-ElguCp108	ndhD	NADH dehydrogenase subunit 4	protein_coding	YP_006073154.1	ElguCp108	6821	6653	4276	3744	185329238574239	145113694933192	117974535047624	110989469340493	0.4313	1024	10.42	0.2577	nonDE
12079489	gene-ElguCp109	psaC	photosystem I subunit VII	protein_coding	YP_006073155.1	ElguCp109	8515	8530	4549	3728	231355881316471	186054384154536	125506585578027	110515155368953	0.7292	1904	10.61	0.08754	nonDE
12079490	gene-ElguCp110	ndhE	NADH dehydrogenase subunit 4L	protein_coding	YP_006073156.1	ElguCp110	756	895	315	320	205408157692603	195215326867889	86908275350799	948627943081138	1049	2.87	7077	0.03211	upReg
12079491	gene-ElguCp114	ndhH	NADH dehydrogenase subunit 7	protein_coding	YP_006073160.1	ElguCp114	6600	8645	5063	5273	17932458211259	188562737516525	139687808920983	156316098245839	0.2246	0.4978	10.69	0.5205	nonDE
12079494	gene-ElguCp128	rps7	ribosomal protein S7	protein_coding	YP_006073163.1	ElguCp128	9503	9722	6026	5363	258200227850901	212054012045767	166256910242513	158984114335754	0.4371	1068	10.93	0.2418	nonDE
12079496	gene-ElguCp129	ndhB	NADH dehydrogenase subunit 2	protein_coding	YP_006073164.1	ElguCp129	3602	3599	3247	2653	978677492075076	78500554346093	8958449843303	786471854060706	-0.02487	0.03936	9745	0.9545	nonDE
12079497	gene-ElguCp092	rps12	ribosomal protein S12	protein_coding	YP_006073083.1	ElguCp092	4682	5059	3210	2980	127211771735022	110345736159179	885636710717666	883409771994309	0.3327	0.8156	10	0.3356	nonDE
12079499	gene-ElguCp001	psbA	photosystem II protein D1	protein_coding	YP_006073084.1	ElguCp001	50006	63156	33153	28698	135868258380639	137754404286798	914688905620648	850741397204453	0.5432	1388	13.42	0.1606	nonDE
12079501	rna-ElguCp002	trnK-UUU	tRNA-Lys	tRNA	.	ElguCp002	473	657	392	416	128515950514023	143303318158886	10815252043655	123321632600548	0.1462	0.2822	6.97	0.6942	nonDE
12079502	gene-ElguCp132	ycf2	hypothetical protein RF2	protein_coding	YP_006073165.1	ElguCp132	10087	11321	6221	7077	274067736328742	246931029661606	171636946335657	209794998537038	0.3654	0.8159	11.12	0.3355	nonDE
12079503	gene-ElguCp003	matK	maturase K	protein_coding	YP_006073085.1	ElguCp003	55627	74561	50237	58979	151140735290562	162630726107225	138603524723749	17484102329682	-0.08128	0.1246	13.93	0.8635	nonDE
12079505	gene-ElguCp134	rpl23	ribosomal protein L23	protein_coding	YP_006073166.1	ElguCp134	1840	2016	1774	1925	499935198616918	439725250240966	489445334832754	570658997009747	-0.2624	0.5899	8.96	0.4595	nonDE
12079506	gene-ElguCp004	rps16	ribosomal protein S16	protein_coding	YP_006073086.1	ElguCp004	9156	10058	4051	4730	248772102094375	21938276621645	111766801093996	140219067836681	0.8102	2041	10.74	0.07525	nonDE
12079507	gene-ElguCp135	rpl2	ribosomal protein L2	protein_coding	YP_006073167.1	ElguCp135	9097	9762	10913	12154	247169049011854	212926482780372	301088891715324	360300750631505	-0.6112	1.5	11.42	0.1398	nonDE
12079509	gene-ElguCp073	rpoA	RNA polymerase alpha subunit	protein_coding	YP_006073136.1	ElguCp073	9183	10980	8454	8089	249505702657563	239493216649097	233245257084335	239795357236979	-0.04205	0.07254	11.23	0.9182	nonDE
12079510	rna-ElguCp136	trnH-GUG	tRNA-His	tRNA	.	ElguCp136	347	334	389	404	942812575652558	72851306339525	107324822576066	119764277813994	-0.5476	1224	6601	0.1984	nonDE
12079511	gene-ElguCp137	rps19	ribosomal protein S19	protein_coding	YP_006073168.1	ElguCp137	2790	2781	2756	2332	758053915294132	606585278234189	760378434497785	691312613520379	-0.1841	0.3719	9454	0.6167	nonDE
12079512	gene-ElguCp006	psbK	photosystem II protein K	protein_coding	YP_006073087.1	ElguCp006	436	306	303	243	118462905759226	667440111972894	835974839088638	720364344277239	0.08746	0.1009	6379	0.8891	nonDE
12079513	gene-ElguCp007	psbI	photosystem II protein I	protein_coding	YP_006073088.1	ElguCp007	122	127	68	88	331478772996	277009458237116	187611515042995	260872684347313	0.3538	0.4399	4702	0.5621	nonDE
105031928	XM_019847185,XM_019847213,XM_019847239	LOC105031928	regulator of telomere elongation helicase 1 homolog, transcript variant X2	protein_coding	XP_019702744.1		146	265	217	217	396687711946033	578011861675872	598701452416616	643288323901896	-0.4443	0.8572	5772	0.3179	nonDE
105032030	XM_010906364,XM_010906371,XM_010906381,XM_019849141,XM_019849155,XM_029260799,XM_029260801	LOC105032030	equilibrative nucleotide transporter 3, transcript variant X4	protein_coding	XP_010904666.1		91	163	251	194	247250560185541	355531824351574	692507209938113	57510569049294	-1149	2.35	5.44	0.05464	nonDE
105032035	XM_010906404,XM_010906474	LOC105032035	transmembrane 9 superfamily member 7, transcript variant X1	protein_coding	XP_010904706.1		909	1126	1063	945	246978856273249	245600511791333	293280941898093	280141689441148	-0.3093	0.8372	8054	0.3264	nonDE
105032134	XM_010906491	LOC105032134	uncharacterized aarF domain-containing protein kinase 2	protein_coding	XP_010904793.1	.	163	118	438	444	44287737703564	257378866708502	120843887630635	131622127102508	-2.04	3662	6031	0.01649	downReg
105032180	XM_010906559	LOC105032180	vesicle-associated protein 4-2	protein_coding	XP_010904861.1	.	308	296	162	109	836848049858755	645628343607767	446956844661252	323126393112012	0.8392	1636	5728	0.1175	nonDE
105032189	XM_010906569	LOC105032189	uncharacterized LOC105032189	protein_coding	XP_010904871.1	.	757	970	232	277	205679861604895	211574153141734	640086345440806	82115606322961	1436	3516	6944	0.01896	upReg
105032229	XM_010906648	LOC105032229	protein ROOT HAIR DEFECTIVE 3	protein_coding	XP_010904950.1	.	805	1067	942	714	218721649394902	232731568455908	259897128191913	211662609799979	-0.1474	0.315	7847	0.6646	nonDE
105032236	XM_010906620	LOC105032236	cyclic nucleotide-gated ion channel 4	protein_coding	XP_010904922.2	.	136	237	58	46	369517320716853	516938910253516	160021586360201	136365266817914	1478	2.2	4676	0.06339	nonDE
105032329	XM_019853888,XM_029260905,XM_029260907,XM_029260909,XM_029260914,XM_029260924,XM_029260929,XM_029260933	LOC105032329	myosin-2, transcript variant X5	protein_coding	XP_019709447.1		255	331	250	159	692844976344099	721969532885712	689748217069834	47134950921844	0.2119	0.3568	5992	0.6298	nonDE
105032337	XM_010906762,XM_010906770,XM_029260944	LOC105032337	sphingosine kinase 1, transcript variant X1	protein_coding	XP_010905064.1		168	162	399	219	45646257265023	353350647515062	110083815444345	649217248546153	-1188	2181	5868	0.06487	nonDE
105032350	XM_010906787	LOC105032350	B3 domain-containing protein Os07g0563300	protein_coding	XP_010905089.1	.	291	430	546	416	790658384769148	937906039700472	150641010608052	123321632600548	-0.7509	1971	6761	0.08088	nonDE
105032371	XM_010906818	LOC105032371	uncharacterized LOC105032371	protein_coding	XP_010905120.1	.	124	162	65	61	336912851241836	353350647515062	179334536438157	180832201649842	0.8439	1369	4648	0.1654	nonDE
105032379	XM_010906828	LOC105032379	ADP-ribosylation factor GTPase-activating protein AGD5	protein_coding	XP_010905130.1	.	189	252	362	245	513520394231509	549656562801207	998755418317119	726293268921496	-0.7719	1801	6075	0.09708	nonDE
105032387	XM_010906865,XR_829819	LOC105032387	SWR1-complex protein 4, transcript variant X2	protein_coding	XP_010905167.1	.	141	267	207	199	383102516331443	582374215348898	571111523733822	589928002103582	-0.3658	0.6489	5714	0.4224	nonDE
105032429	XM_010906881,XM_010906889	LOC105032429	transmembrane protein 184C, transcript variant X1	protein_coding	XP_010905183.1		234	275	209	172	63578715476282	599823630041	576629509470381	509887519406111	0.09115	0.146	5858	0.8355	nonDE
105032478	XM_010906936	LOC105032478	receptor-like protein kinase THESEUS 1	protein_coding	XP_010905238.1	.	197	225	81	131	535256707214853	490764788215363	223478422330626	388344564198841	0.7246	1156	5285	0.2173	nonDE
105032521	XM_010906985,XM_029260995	LOC105032521	secretory carrier-associated membrane protein 2, transcript variant X1	protein_coding	XP_010905287.1		379	451	568	549	102975782758594	983710753267239	156710794918266	162748981484858	-0.7576	2117	6988	0.06924	nonDE
105032531	XM_010907008,XM_029260996,XM_029260999	LOC105032531	brefeldin A-inhibited guanine nucleotide-exchange protein 5, transcript variant X2	protein_coding	XP_010905310.1		3435	4785	3763	3201	933302938722345	104369311627134	103820901633351	94892438931335	-0.09884	0.1972	9951	0.7777	nonDE
105032557	XM_010907050,XM_010907059,XM_029261001,XM_029261004,XM_029261010	LOC105032557	uncharacterized LOC105032557, transcript variant X3	protein_coding	XP_010905352.1		193	148	328	280	524388550723181	322814171803883	904949660795622	830049450195995	-1199	2377	5903	0.05278	nonDE
105032602	XM_010907088,XM_010907095,XM_010907103,XM_010907109,XM_010907115,XM_010907124,XM_010907132,XM_010907137,XM_010907153,XM_019846001,XM_019846009	LOC105032602	protein STRUBBELIG-RECEPTOR FAMILY 3, transcript variant X2	protein_coding	XP_010905390.1		50	151	40	108	135851956145902	329357702313422	110359714731173	320161930789884	0.2051	0.1241	4329	0.8637	nonDE
105032618	XM_010907141	LOC105032618	polyamine oxidase 1	protein_coding	XP_010905443.1	.	338	364	489	499	918359223546296	793948368490632	134914751258859	147926669874215	-0.8192	2128	6781	0.06855	nonDE
105032681	XM_010907191,XM_010907207,XM_029261034	LOC105032681	helicase-like transcription factor CHR28, transcript variant X1	protein_coding	XP_010905493.1		878	773	2415	2431	238556034992203	168604969462434	666296777689459	720660790509452	-1886	4163	8543	0.01447	downReg
105032745	XM_010907327	LOC105032745	pathogen-associated molecular patterns-induced protein A70	protein_coding	XP_010905629.2	.	168	128	219	108	45646257265023	279190635073629	604219438153174	320161930789884	-0.4591	0.5563	5313	0.4799	nonDE
105032935	XM_010907541	LOC105032935	mitochondrial substrate carrier family protein B	protein_coding	XP_010905843.1	.	104	104	128	101	282572068783476	226842390997323	353151087139755	299410694534984	-0.4824	0.7448	4849	0.3678	nonDE
105032958	XM_010907571,XM_010907580	LOC105032958	ras-related protein Rab2BV, transcript variant X1	protein_coding	XP_010905873.1		336	334	157	185	91292514530046	72851306339525	433161880319856	548425529593783	0.6514	1331	5982	0.1735	nonDE
105032978	XM_010907588	LOC105032978	26S proteasome non-ATPase regulatory subunit 14 homolog	protein_coding	XP_010905890.1	.	664	689	281	258	180411397761757	150283084035727	775276995986493	764831279109167	0.999	2577	6817	0.04378	upReg
105033022	XM_010907656,XM_010907665	LOC105033022	phosphatidylinositol:ceramide inositolphosphotransferase, transcript variant X1	protein_coding	XP_010905958.1		407	247	395	651	110583492302764	538750678618643	108980218297034	192986497170569	-1.01	1374	6727	0.1639	nonDE
105033039	XM_010907683	LOC105033039	uncharacterized LOC105033039	protein_coding	XP_010905985.1	.	121	157	66	81	328761733873082	342444763332498	182093529306436	240121448092413	0.6003	0.9073	4735	0.2998	nonDE
105033063	XM_010907744,XM_010907879,XM_029263406	LOC105033063	ATP-dependent zinc metalloprotease FTSH 5, mitochondrial, transcript variant X3	protein_coding	XP_010906046.1		346	405	270	258	94009553652964	883376618787654	74492807443542	764831279109167	0.1787	0.3455	6376	0.6381	nonDE
105033202	XM_010907891,XM_010907900,XR_829945	LOC105033202	carnosine N-methyltransferase, transcript variant X1	protein_coding	XP_010906193.1		258	318	110	90	700996093712853	693614234011047	303489215510727	26680160899157	1193	2513	5482	0.04634	upReg
105033213	XM_010907918,XM_010907926	LOC105033213	dihydroceramide fatty acyl 2-hydroxylase FAH1, transcript variant X1	protein_coding	XP_010906220.1		129	279	110	137	350498046856426	60854833738705	303489215510727	406131338131612	0.3457	0.4435	5337	0.5586	nonDE
105033235	XM_010907949	LOC105033235	tubulin beta chain	protein_coding	XP_010906251.1	.	905	1803	618	865	245892040624082	393266183623244	170505759259663	25642599086412	0.4857	0.8453	7995	0.3233	nonDE
105033250	XM_010907972,XM_010907980	LOC105033250	actin-depolymerizing factor, transcript variant X1	protein_coding	XP_010906274.1		964	1091	515	512	261922571449299	237966392863538	142088132716386	151780470892982	0.6756	1907	7582	0.08754	nonDE
105033264	XM_010907993,XM_010908009	LOC105033264	nucleolar complex protein 2 homolog, transcript variant X1	protein_coding	XP_010906295.1		135	178	127	89	366800281593935	388249476899265	350392094271475	263837146669441	0.2097	0.2968	5088	0.681	nonDE
105033298	XM_010908065	LOC105033298	WD-40 repeat-containing protein MSI4	protein_coding	XP_010906367.1	.	275	497	287	202	74718575880246	108404488774682	791830953196169	598821389069968	0.3001	0.5283	6301	0.5	nonDE
105033366	XM_010908161,XM_010908245,XM_019853186,XM_029263417	LOC105033366	zinc finger CCCH domain-containing protein 59, transcript variant X1	protein_coding	XP_010906463.1		160	173	177	177	434726259666886	377343592716702	488341737685442	524709831016754	-0.4216	0.826	5505	0.3313	nonDE
105033399	XM_010908177,XM_010908184,XM_019848673	LOC105033399	GDP-L-galactose phosphorylase 2, transcript variant X3	protein_coding	XP_010906479.1		98	111	125	118	266269834045967	242110628852913	344874108534917	349806554011169	-0.5527	0.9456	4899	0.2857	nonDE
105033471	XM_010908302	LOC105033471	patatin-like protein 3	protein_coding	XP_010906604.1	.	144	166	175	243	391253633700197	362075354861112	482823751948884	720364344277239	-0.7376	1365	5562	0.1658	nonDE
105033480	XM_010908312,XR_002165084	LOC105033480	renalase, transcript variant X2	protein_coding	XP_010906614.2	.	131	156	84	69	355932125102263	340263586495985	231755400935464	20454790022687	0.5704	0.91	4.79	0.2989	nonDE
105033490	XM_010908362,XM_010908429,XM_019853199,XM_029263422,XM_029263427,XM_029263439,XM_029263442,XM_029263447,XM_029263451,XM_029263455,XM_029263457,XM_029263458,XM_029263459,XM_029263461,XM_029263462,XM_029263466,XM_029263467	LOC105033490	proline-rich protein 36, transcript variant X3	protein_coding	XP_010906664.1		196	97	239	156	532539668091935	211574153141734	659399295518761	462456122252055	-0.9036	1133	5433	0.2244	nonDE
105033498	XM_010908328	LOC105033498	DEAD-box ATP-dependent RNA helicase 53	protein_coding	XP_010906630.1	.	167	191	147	118	453745533527312	416604775773931	405571951637062	349806554011169	0.103	0.1455	5343	0.8363	nonDE
105033689	XM_010908587	LOC105033689	F-box/LRR-repeat protein At3g48880	protein_coding	XP_010906889.1	.	111	220	171	110	301591342643902	4798589040328	471787780475766	326090855434141	-0.1155	0.1328	5277	0.8526	nonDE
105033710	XM_010908646,XM_010908718	LOC105033710	developmentally-regulated G-protein 2, transcript variant X1	protein_coding	XP_010906948.1		546	660	634	444	148350336111325	14395767120984	17492014784891	131622127102508	-0.1497	0.2844	7.22	0.692	nonDE
105033760	XM_010908674,XM_019853789,XM_029261250,XM_029261252,XM_029261255,XM_029261257,XM_029261260,XR_003798862,XR_003798863,XR_003798864	LOC105033760	uncharacterized LOC105033760, transcript variant X5	protein_coding	XP_010906976.1		264	432	238	227	717298328450361	942268393373497	656640302650482	672932947123182	0.2223	0.4141	6211	0.5824	nonDE
105033782	XM_010908705,XM_019849712	LOC105033782	subtilisin-like protease SBT2.2, transcript variant X1	protein_coding	XP_010907007.1		119	209	98	161	323327655627246	45586595883116	270381301091375	477278433862697	0.05409	0.05256	5.22	0.941	nonDE
105033839	XM_010908779	LOC105033839	vacuolar protein sorting-associated protein 53 A	protein_coding	XP_010907081.1	.	619	703	534	508	168184721708626	153336731606845	147330219166116	150594685964131	0.01515	0.02505	7274	0.9712	nonDE
105033844	XM_010908789	LOC105033844	probable protein NAP1	protein_coding	XP_010907091.1	.	890	1589	728	901	241816481939705	346588999321872	200854680810736	267098055223783	0.2336	0.4143	8017	0.5823	nonDE
105033866	XM_010908826,XM_010908834,XM_019846598,XM_029261280	LOC105033866	probable UDP-arabinose 4-epimerase 1, transcript variant X2	protein_coding	XP_010907128.1		928	1062	672	1030	252141230606794	231640980037651	185404320748371	305339619179241	-0.06436	0.08422	7906	0.9054	nonDE
105033889	XM_010908861	LOC105033889	protein PAT1 homolog 1	protein_coding	XP_010907163.1	.	331	444	553	419	899339949685869	96844251541165	152572305615847	124210971297186	-0.6519	1733	6826	0.1046	nonDE
105034007	XM_010909030	LOC105034007	UPF0613 protein PB24D3.06c	protein_coding	XP_010907332.1	.	141	176	82	94	383102516331443	38388712322624	226237415198905	278659458280084	0.5248	0.8586	4962	0.3174	nonDE
105034097	XM_010909124	LOC105034097	stem-specific protein TSJT1	protein_coding	XP_010907426.1	.	387	726	255	159	105149414056928	158353438330824	70354318141123	47134950921844	1074	2.18	6432	0.06487	nonDE
105034121	XM_029262430	LOC105034121	cold-responsive protein kinase 1	protein_coding	XP_029118263.1	.	76	102	269	256	206494973341771	222480037324298	742169081567141	75890235446491	-1889	3632	5331	0.01702	downReg
105034203	XM_010909261,XM_029261343	LOC105034203	oligopeptide transporter 3, transcript variant X1	protein_coding	XP_010907563.1		1290	2997	1677	1299	350498046856426	653698697902864	462683104010444	385083655644499	0.08751	0.1131	8813	0.8762	nonDE
105034212	XM_010909267	LOC105034212	mitochondrial import inner membrane translocase subunit TIM50	protein_coding	XP_010907569.1	.	156	125	104	94	423858103175213	272647104564091	286935258301051	278659458280084	0.1293	0.1379	4961	0.8452	nonDE
105034220	XM_010909276	LOC105034220	transcriptional adapter ADA2	protein_coding	XP_010907578.1	.	592	749	563	449	160848716076748	163370145054803	155331298484127	133104358263572	0.08021	0.1506	7256	0.8302	nonDE
105034243	XM_010909311	LOC105034243	putative DUF21 domain-containing protein At3g13070, chloroplastic	protein_coding	XP_010907613.1	.	92	171	114	97	249967599308459	372981239043676	314525186983844	28755284524647	-0.03643	0.03847	4928	0.9552	nonDE
105034271	XM_010909355	LOC105034271	40S ribosomal protein S19	protein_coding	XP_010907657.1	.	475	483	326	261	129059358338607	105350841203565	899431675059063	773724666075553	0.3834	0.8339	6626	0.3279	nonDE
105034280	XM_010909365	LOC105034280	40S ribosomal protein S19	protein_coding	XP_010907667.1	.	1128	1395	826	707	306482013065154	304274168693525	227892810919873	209587486174489	0.3918	1104	8014	0.2314	nonDE
105034289	XM_010909378,XM_029261370	LOC105034289	chitin-inducible gibberellin-responsive protein 2, transcript variant X1	protein_coding	XP_010907680.1		255	312	480	303	692844976344099	68052717299197	132431657677408	898232083604952	-0.7631	1743	6438	0.1041	nonDE
105034339	XM_010909465,XM_010909473	LOC105034339	uncharacterized LOC105034339, transcript variant X1	protein_coding	XP_010907767.1		139	154	156	151	377668438085607	33590123282296	430402887451576	447633810641412	-0.4025	0.7471	5.31	0.3669	nonDE
105034362	gene-LOC105034362	LOC105034362	.	pseudogene	.	.	120	234	204	129	326044694750164	510395379743978	562834545128984	382415639554584	-0.2591	0.3551	5448	0.6303	nonDE
105034417	XM_010909589,XM_010909615,XM_019848426,XM_019848430,XM_029262389,XM_029262390,XM_029262391,XM_029262393,XM_029262394,XM_029262395,XM_029262396,XM_029262397,XM_029262398,XM_029262399,XM_029262400	LOC105034417	uncharacterized protein At5g08430, transcript variant X4	protein_coding	XP_010907891.1		209	276	91	105	567861176689869	602004806877512	251068351013419	311268543823498	0.9817	1961	5343	0.08185	nonDE
105034513	XM_010909708,XM_010909717	LOC105034513	leucine--tRNA ligase, cytoplasmic, transcript variant X1	protein_coding	XP_010908010.1		1158	1679	1533	1135	314633130433908	366219590850487	422953606707222	336466473561591	-0.2427	0.5628	8484	0.4754	nonDE
105034573	XM_010909787	LOC105034573	KH domain-containing protein At1g09660/At1g09670	protein_coding	XP_010908089.1	.	1423	2768	1277	1226	386634667191236	603749748346723	352323389279271	363443080692961	0.34	0.7002	8.7	0.392	nonDE
105034592	XM_010909807	LOC105034592	fructokinase-2	protein_coding	XP_010908109.1	.	157	237	236	261	426575142298131	516938910253516	651122316913923	773724666075553	-0.6742	1523	5855	0.1358	nonDE
105034762	XM_010910034	LOC105034762	guanosine nucleotide diphosphate dissociation inhibitor 1	protein_coding	XP_010908336.1	.	2005	2748	1617	1581	544766344145066	599387394673697	446129146800768	468681493128525	0.2306	0.5615	8998	0.4759	nonDE
105034839	XM_010910150,XM_019848586,XR_002164037,XR_830236,XR_830237,XR_830245	LOC105034839	inositol-tetrakisphosphate 1-kinase 6, transcript variant X3	protein_coding	XP_010908452.1		126	201	57	48	342346929487672	438416544139058	157262593491922	142294191462171	1287	1988	4599	0.07887	nonDE
105034884	XM_010910204	LOC105034884	probable thiol methyltransferase 2	protein_coding	XP_010908506.2	.	161	220	72	107	437443298789804	4798589040328	198647486516112	317197468467755	0.7981	1314	5.09	0.1781	nonDE
105034893	XM_019848611,XM_029262347	LOC105034893	beta-hexosaminidase 3, transcript variant X2	protein_coding	XP_019704170.1		127	324	62	271	34506396861059	706701295030123	171057557833319	803369289296838	0.4216	0.2691	5425	0.7054	nonDE
105034901	XM_010910224	LOC105034901	ankyrin repeat-containing protein At5g02620	protein_coding	XP_010908526.1	.	313	350	504	341	850433245473345	763411892779454	139053240561278	101088165184584	-0.6545	1537	6613	0.1342	nonDE
105034905	XM_029263502	LOC105034905	mitochondrial carrier protein CoAc1	protein_coding	XP_029119335.1	.	150	205	193	114	407555868437705	447141251485109	532485623577912	337948704722655	-0.09463	0.1203	5416	0.868	nonDE
105034932	XM_010910282,XM_010910290,XM_019848664	LOC105034932	probably inactive leucine-rich repeat receptor-like protein kinase At5g48380, transcript variant X3	protein_coding	XP_010908584.1		400	373	647	501	108681564916721	813578960019247	178506838577673	148519562338641	-0.8931	2157	6953	0.06672	nonDE
105034979	XM_010910382	LOC105034979	IQ domain-containing protein IQM1	protein_coding	XP_010908684.1	.	112	141	530	332	30430838176682	307545933948294	146226622018805	98420149094668	-2066	3872	5925	0.01613	downReg
105035012	XM_010910403,XM_010910410,XM_010910414	LOC105035012	sister chromatid cohesion 1 protein 4, transcript variant X1	protein_coding	XP_010908705.1		316	268	220	261	858584362842099	58455539218541	606978431021454	773724666075553	-0.04862	0.05878	6125	0.9339	nonDE
105035054	XM_010910484	LOC105035054	carbamoyl-phosphate synthase large chain, chloroplastic	protein_coding	XP_010908786.1	.	431	320	473	380	117104386197767	697976587684072	130500362669613	112649568240885	-0.5304	0.9445	6712	0.2858	nonDE
105035062	XM_010910461	LOC105035062	ribonuclease 2	protein_coding	XP_010908763.1	.	644	1428	545	373	174977319515921	311472052254017	150365111321224	110574444615395	0.7654	1.45	7.44	0.1484	nonDE
105035081	XM_010910847	LOC105035081	butyrate--CoA ligase AAE11, peroxisomal	protein_coding	XP_010909149.1	.	337	562	256	509	915642184423378	122582138212015	70630217427951	150891132196343	-0.03623	0.03398	6.71	0.9602	nonDE
105035082	XM_010910490	LOC105035082	uncharacterized LOC105035082	protein_coding	XP_010908792.1	.	132	328	170	116	358649164225181	715426002376174	469028787607487	343877629366912	0.2634	0.302	5.5	0.6765	nonDE
105035093	XM_010910507,XM_010910521,XM_010910544,XM_019848721,XM_029262323,XM_029262330	LOC105035093	protein FAR1-RELATED SEQUENCE 6, transcript variant X5	protein_coding	XP_010908809.1		130	260	160	161	353215085979345	567105977493309	441438858924694	477278433862697	-0.09865	0.124	5507	0.8637	nonDE
105035136	XM_010910570	LOC105035136	probable ion channel CASTOR	protein_coding	XP_010908872.2	.	217	309	206	163	589597489673214	673983642482432	568352530865543	483207358506954	0.175	0.3085	5848	0.6704	nonDE
105035154	XM_010910602	LOC105035154	BAG-associated GRAM protein 1-like	protein_coding	XP_010908904.2	.	230	263	154	157	624918998271148	573649508002847	424884901715018	465420584574183	0.3372	0.6521	5693	0.4204	nonDE
105035213	XM_010910676	LOC105035213	flowering time control protein FPA	protein_coding	XP_010908978.1	.	248	240	295	310	673825702483673	523482440763054	813902896142404	918983319859852	-0.641	1419	6166	0.1542	nonDE
105035255	XM_010910759,XM_010910769	LOC105035255	TBC1 domain family member 22B, transcript variant X1	protein_coding	XP_010909061.1		213	336	221	95	578729333181541	732875417068276	609737423889733	281623920602213	0.5364	0.7617	5703	0.3601	nonDE
105035271	XM_010910787	LOC105035271	protein CLP1 homolog	protein_coding	XP_010909089.1	.	222	423	145	194	603182685287804	922637801844883	400053965900504	57510569049294	0.5662	0.9605	5906	0.2803	nonDE
105035295	XM_010910820,XM_029262293,XR_003799578	LOC105035295	starch synthase 3, chloroplastic/amyloplastic, transcript variant X2	protein_coding	XP_010909122.1		281	460	193	189	763487993539968	100334134479585	532485623577912	560283378882297	0.5966	1356	6114	0.1675	nonDE
105035312	XM_010910843	LOC105035312	probable membrane-associated 30 kDa protein, chloroplastic	protein_coding	XP_010909145.1	.	162	247	119	97	440160337912722	538750678618643	328320151325241	28755284524647	0.5752	1086	5279	0.2365	nonDE
105035317	XM_010910888	LOC105035317	casein kinase 1-like protein 2	protein_coding	XP_010909190.1	.	1320	883	2956	2567	358649164225181	192597914664074	815558291863371	7609774780904	-1674	3.11	8.83	0.02541	downReg
105035360	XM_010910910	LOC105035360	selenoprotein F	protein_coding	XP_010909212.1	.	196	262	153	88	532539668091935	571468331166334	422125908846738	260872684347313	0.6218	1117	5424	0.2286	nonDE
105035371	XM_010910921	LOC105035371	fructokinase-1	protein_coding	XP_010909223.1	.	242	130	460	470	657523467746164	283552988746654	126913671940849	139329729140042	-1763	2741	6247	0.03688	downReg
105035389	XM_010910940	LOC105035389	proteasome subunit beta type-4	protein_coding	XP_010909242.1	.	725	1225	513	544	196985336411558	267194162472809	14153633414273	161266750323793	0.5161	1255	7542	0.1915	nonDE
105035405	XM_010910984	LOC105035405	probable magnesium transporter NIPA9	protein_coding	XP_010909286.1	.	80	45	157	143	217363129833443	981529576430727	433161880319856	423918112064383	-1712	2348	4654	0.05464	nonDE
105035417	XM_010910967	LOC105035417	probable polygalacturonase	protein_coding	XP_010909269.1	.	180	328	120	97	489067042125246	715426002376174	33107914419352	28755284524647	0.8531	1577	5422	0.1275	nonDE
105035453	XM_010911020	LOC105035453	SWI/SNF-related matrix-associated actin-dependent regulator of chromatin subfamily A-like protein 1	protein_coding	XP_010909322.1	.	84	160	100	85	228231286325115	348988293842036	275899286827933	251979297380927	0.0422	0.04209	4777	0.9521	nonDE
105035462	XM_010911031,XM_019848558	LOC105035462	aspartic proteinase, transcript variant X2	protein_coding	XP_010909333.1		3032	4276	3347	2096	823806262068748	932671215292842	923434913013093	621351302718145	0.1209	0.2045	9671	0.77	nonDE
105035492	XM_010911065	LOC105035492	dnaJ protein ERDJ2	protein_coding	XP_010909367.1	.	655	926	929	805	177966062551131	201976975061078	25631043746315	238639216931349	-0.4721	1368	7759	0.1654	nonDE
105035527	XM_010911111	CHI2	chitinase 10	protein_coding	XP_010909413.1	.	122	60	404	651	331478772996	130870610190764	111463311878485	192986497170569	-2987	3375	5794	0.02109	downReg
105035592	XM_019848377,XM_029262250,XR_003799546	LOC105035592	pectin acetylesterase 12, transcript variant X3	protein_coding	XP_019703936.1		116	357	27	226	315176538258492	778680130635043	74492807443542	669968484801053	1185	0.6882	5066	0.3988	nonDE
105035637	XM_010911258,XM_010911264,XM_019848752,XM_029262245	LOC105035637	protein phosphatase 2C 32, transcript variant X2	protein_coding	XP_010909560.1		165	337	217	162	448311455281476	735056593904789	598701452416616	480242896184826	0.02086	0.02413	5797	0.9728	nonDE
105035667	XM_010911341	LOC105035667	26S proteasome non-ATPase regulatory subunit 12 homolog A	protein_coding	XP_010909643.1	.	572	876	495	418	155414637830912	191071090878515	136570146979827	123914525064974	0.3181	0.7604	7227	0.3607	nonDE
105035699	XM_010911354,XM_019848791	LOC105035699	rhomboid-like protein 14, mitochondrial, transcript variant X2	protein_coding	XP_010909656.1		80	169	150	97	217363129833443	368618885370651	4138489302419	28755284524647	-0.3411	0.4249	4972	0.5742	nonDE
105035709	XM_019847349	LOC105035709	mediator of RNA polymerase II transcription subunit 19a	protein_coding	XP_019702908.1	.	104	142	104	78	282572068783476	309727110784807	286935258301051	231228061126027	0.1046	0.1217	4794	0.8665	nonDE
105035751	XM_010911439,XM_029262223	LOC105035751	transmembrane protein 64, transcript variant X1	protein_coding	XP_010909741.1		139	211	236	205	377668438085607	460228312504185	651122316913923	607714776036354	-0.6731	1558	5682	0.131	nonDE
105035807	XM_010911540	LOC105035807	glycylpeptide N-tetradecanoyltransferase 1	protein_coding	XP_010909842.1	.	123	129	150	95	334195812118918	281371811910142	4138489302419	281623920602213	-0.2816	0.3833	5022	0.6075	nonDE
105035892	XM_010911637,XM_010911699	LOC105035892	THO complex subunit 6, transcript variant X2	protein_coding	XP_010909939.2		446	700	327	290	121179944882144	152682378555891	902190667927342	859694073417281	0.5411	1368	6776	0.1654	nonDE
105035928	XM_019847650	LOC105035928	calreticulin-3	protein_coding	XP_019703209.1	.	164	204	166	150	445594416158558	444960074648596	45799281613437	444669348319283	-0.1124	0.1746	5491	0.802	nonDE
105036004	XM_019848734,XM_019848735,XM_019848736,XM_019848737,XM_019848739,XM_029262236,XM_029262237	LOC105036004	nuclear pore complex protein NUP98A, transcript variant X3	protein_coding	XP_019704293.1		123	123	169	76	334195812118918	268284750891065	466269794739208	22529913648177	-0.2614	0.2765	4968	0.6987	nonDE
105036013	XM_029263033	LOC105036013	protein COP1 SUPPRESSOR 2	protein_coding	XP_029118866.1	.	131	133	174	169	355932125102263	290096519256193	480064759080604	500994132439726	-0.7205	1462	5316	0.1468	nonDE
105036057	XM_010911800,XM_029262420,XM_029262421	LOC105036057	protein YLS7, transcript variant X1	protein_coding	XP_010910102.1		293	452	213	208	796092463014984	985891930103752	587665480943498	616608163002739	0.4723	1.08	6193	0.2383	nonDE
105036063	XM_010911812,XM_010911817	LOC105036063	D-3-phosphoglycerate dehydrogenase, transcript variant X2	protein_coding	XP_010910114.1		344	419	187	213	934661458283804	913913094498832	515931666368236	631430474613382	0.6069	1412	6185	0.1551	nonDE
105036107	XM_010911851,XM_019848405,XM_029262418	LOC105036107	shaggy-related protein kinase kappa, transcript variant X1	protein_coding	XP_010910153.1		449	542	271	340	12199505661902	11821978453899	7476870673037	100791718952371	0.3782	0.7795	6676	0.3514	nonDE
105036117	XM_010911888,XM_029263545,XR_003800355	LOC105036117	uncharacterized LOC105036117, transcript variant X3	protein_coding	XP_010910190.1		868	1668	843	508	235838995869285	363820296330323	232583098795948	150594685964131	0.5502	1063	7872	0.2429	nonDE
105036143	XM_010911893,XM_010911908,XM_029262412,XM_029262413,XM_029262414,XM_029262415,XM_029262416,XR_003799715,XR_003799716,XR_003799717,XR_003799718,XR_003799719	LOC105036143	regulator of nonsense transcripts UPF3, transcript variant X7	protein_coding	XP_010910195.1		94	153	120	133	255401677554295	333720055986447	33107914419352	394273488843098	-0.3658	0.5596	5027	0.4772	nonDE
105036216	XM_010911984,XM_029262410,XM_029262411,XR_830460,XR_830461,XR_830463	LOC105036216	mitotic spindle checkpoint protein MAD1, transcript variant X1	protein_coding	XP_010910286.1		525	622	531	480	142644553953197	135669199231092	146502521305633	142294191462171	-0.1465	0.3021	7148	0.6765	nonDE
105036282	XM_010912047,XM_010912053	LOC105036282	splicing factor 3B subunit 4, transcript variant X2	protein_coding	XP_010910349.1		70	166	143	98	190192738604262	362075354861112	394535980163945	290517307568598	-0.4085	0.497	4904	0.521	nonDE
105036316	XM_010912089,XM_019848632	LOC105036316	probable serine/threonine-protein kinase At1g54610, transcript variant X1	protein_coding	XP_010910391.1		97	110	107	122	263552794923049	2399294520164	295212236905889	361664403299684	-0.4705	0.7212	4848	0.3794	nonDE
105036346	XM_010912123	LOC105036346	protein ABHD11	protein_coding	XP_010910425.1	.	102	104	93	118	27713799053764	226842390997323	256586336749978	349806554011169	-0.356	0.462	4783	0.5456	nonDE
105036365	XM_010912154,XM_019848472,XM_019848473,XM_019848474,XM_019848475	LOC105036365	protein WVD2-like 7, transcript variant X2	protein_coding	XP_010910456.1		320	357	223	159	869452519333771	778680130635043	615255409626292	47134950921844	0.5105	1.11	6.06	0.2297	nonDE
105036407	XM_010912175,XM_010912183,XM_029262405,XM_029262406,XM_029262407	LOC105036407	non-lysosomal glucosylceramidase, transcript variant X5	protein_coding	XP_010910477.1		956	1162	1165	1076	259748940150964	253452748402779	321422669154542	318976145861032	-0.4098	1176	8164	0.211	nonDE
105036427	XM_010912196,XM_019848552,XM_029262402,XM_029262403,XM_029262404,XR_003799712,XR_003799713,XR_003799714	LOC105036427	phospholipase SGR2, transcript variant X1	protein_coding	XP_010910498.1		367	570	440	252	997153358110919	124327079681225	121395686204291	747044505176396	0.1354	0.1972	6688	0.7777	nonDE
105036505	XM_010912272	LOC105036505	uncharacterized LOC105036505	protein_coding	XP_010910574.1	.	114	156	103	145	309742460012656	340263586495985	284176265432771	42984703670864	-0.1727	0.2113	5.08	0.764	nonDE
105036581	XM_010912340	LOC105036581	3-phosphoinositide-dependent protein kinase 2	protein_coding	XP_010910642.1	.	182	200	112	123	494501120371082	436235367302545	309007201247285	364628865621812	0.3758	0.6357	5308	0.4304	nonDE
105036626	XM_010912379	LOC105036626	transportin-1	protein_coding	XP_010910681.1	.	1038	1560	1190	862	282028660958892	340263586495985	328320151325241	255536652167481	0.006005	0.009636	8227	0.9887	nonDE
105036650	XM_010912404	LOC105036650	probable magnesium transporter NIPA6	protein_coding	XP_010910706.2	.	274	347	398	299	744468719679542	756868362269916	109807916157518	886374234316438	-0.4868	1175	6429	0.2111	nonDE
105036676	XM_019848640	LOC105036676	uncharacterized LOC105036676	protein_coding	XP_019704199.1	.	757	1054	493	476	205679861604895	229896038568441	136018348406171	141108406533319	0.5613	1599	7441	0.1234	nonDE
105036687	XM_010912436	LOC105036687	cystathionine beta-lyase, chloroplastic	protein_coding	XP_010910738.1	.	173	174	183	133	47004776826482	379524769553214	504895694895118	394273488843098	-0.1935	0.29	5444	0.6856	nonDE
105036736	XM_010912476	LOC105036736	uncharacterized LOC105036736	protein_coding	XP_010910778.1	.	176	288	206	145	478198885633574	628178928915665	568352530865543	42984703670864	0.06127	0.08294	5706	0.9069	nonDE
105036768	XM_029263558	LOC105036768	vesicle transport v-SNARE 13	protein_coding	XP_029119391.1	.	831	1581	469	576	225785951114489	344844057852662	129396765522301	170753029754605	0.8212	1781	7671	0.0993	nonDE
105036774	XM_010912529	LOC105036774	ubiquinone biosynthesis monooxygenase COQ6, mitochondrial	protein_coding	XP_010910831.1	.	116	102	101	47	315176538258492	222480037324298	278658279696213	139329729140042	0.2657	0.247	4523	0.7275	nonDE
105036806	XM_010912543	LOC105036806	transmembrane 9 superfamily member 1	protein_coding	XP_010910845.1	.	1157	1549	1181	1168	314361426521617	337864291975821	325837057743789	346249199224615	-0.134	0.2921	8371	0.6839	nonDE
105036827	XM_010912560	LOC105036827	FT-interacting protein 3	protein_coding	XP_010910862.1	.	148	227	201	134	402121790191869	495127141888389	554557566524146	397237951165226	-0.1633	0.2416	5.52	0.7326	nonDE
105036846	XM_010912576,XM_010912581	LOC105036846	patellin-3, transcript variant X1	protein_coding	XP_010910878.1		1354	2051	2040	1565	367887097243102	44735936916876	562834545128984	463938353413119	-0.4235	1121	8831	0.2281	nonDE
105036876	XM_010912601	LOC105036876	1-phosphatidylinositol-3-phosphate 5-kinase FAB1A	protein_coding	XP_010910903.1	.	535	613	585	542	145361593076115	13370614007823	161401082794341	160673857859368	-0.3014	0.7307	7229	0.3743	nonDE
105036886	XM_010912612,XM_029262461,XM_029262462	LOC105036886	serine hydroxymethyltransferase 7, transcript variant X3	protein_coding	XP_010910914.2		125	101	82	103	339629890364754	220298860487785	226237415198905	305339619179241	-0.06672	0.06133	4752	0.9316	nonDE
105036922	XM_010912646,XM_029262460	LOC105036922	potassium channel AKT2, transcript variant X1	protein_coding	XP_010910948.1		457	601	413	207	124168687917354	131088727874415	113946405459937	613643700680611	0.5125	0.9175	6693	0.2957	nonDE
105036937	XM_010912656	LOC105036937	UDP-galactose transporter 1	protein_coding	XP_010910958.1	.	296	398	243	328	804243580383738	868108380932065	670435266991878	972343641658166	-0.03595	0.04754	6362	0.946	nonDE
105036968	XM_010912687	LOC105036968	ubiquitin-like domain-containing CTD phosphatase	protein_coding	XP_010910989.2	.	389	479	531	353	105692821881512	10447837046896	146502521305633	104645519971138	-0.3327	0.7001	6835	0.392	nonDE
105036994	XM_029262459	LOC105036994	ABC transporter D family member 1-like	protein_coding	XP_029118292.1	.	158	434	234	268	429292181421049	946630747046523	645604331177364	794475902330453	-0.2315	0.2625	6081	0.7123	nonDE
105037081	XM_010912787,XM_010912794	LOC105037081	probable methyltransferase PMT26, transcript variant X1	protein_coding	XP_010911089.1		2167	1883	3527	5226	588782377936338	410715598315346	973096784642121	154922800954438	-1409	2706	9602	0.03813	downReg
105037099	XM_010912803,XM_010912810,XM_010912815,XM_019848381,XM_029262456,XM_029262457,XR_003799734	LOC105037099	uncharacterized LOC105037099, transcript variant X6	protein_coding	XP_010911105.1		166	216	160	127	451028494404394	471134196686749	441438858924694	376486714910326	0.08111	0.1172	5442	0.8711	nonDE
105037126	XM_010912853,XM_029263572	LOC105037126	IAA-amino acid hydrolase ILR1-like 1, transcript variant X2	protein_coding	XP_010911155.1		97	101	663	523	263552794923049	220298860487785	18292122716692	155041379447323	-2913	5037	5998	0.006948	downReg
105037223	XM_010912944	LOC105037223	vacuolar-processing enzyme	protein_coding	XP_010911246.1	.	2550	5577	2014	1682	692844976344099	121644232172315	555661163671458	498622562582023	0.7072	1493	9441	0.1415	nonDE
105037249	XM_010912939	LOC105037249	ubinuclein-1	protein_coding	XP_010911241.1	.	245	295	214	198	665674585114919	643447166771254	590424473811778	586963539781454	0.0603	0.09519	5959	0.894	nonDE
105037320	XM_010913027,XM_010913161,XM_029263577,XR_002165698,XR_003800363,XR_003800364,XR_003800368,XR_830582,XR_830597	LOC105037320	pentatricopeptide repeat-containing protein At1g10910, chloroplastic, transcript variant X1	protein_coding	XP_010911329.1		479	710	380	208	130146173987774	154863555392404	104841728994615	616608163002739	0.7269	1507	6741	0.1383	nonDE
105037336	XM_010913015	LOC105037336	uncharacterized LOC105037336	protein_coding	XP_010911317.1	.	149	130	165	76	404838829314787	283552988746654	45523382326609	22529913648177	-0.0764	0.06883	5048	0.923	nonDE
105037408	XM_010913080	LOC105037408	probable magnesium transporter NIPA4	protein_coding	XP_010911382.1	.	453	531	694	615	123081872268187	115820490018826	191474105058586	182314432810906	-0.7391	2129	7224	0.06855	nonDE
105037449	XM_019848493,XM_029262451,XM_029262452,XM_029262453	LOC105037449	valine--tRNA ligase, mitochondrial 1, transcript variant X4	protein_coding	XP_019704052.1		1299	1618	1662	1509	352943382067053	352914412147759	458544614708025	447337364409199	-0.4499	1321	8644	0.1765	nonDE
105037566	XM_010913214,XM_010913221,XM_019848464,XM_019848465,XM_029262441,XR_002164011,XR_002164012,XR_002164013,XR_002164014	LOC105037566	F-box protein SKP2A, transcript variant X3	protein_coding	XP_010911516.1		121	234	171	97	328761733873082	510395379743978	471787780475766	28755284524647	0.06915	0.07213	5285	0.9186	nonDE
105037595	XM_010913239	LOC105037595	ras-related protein RABC1	protein_coding	XP_010911541.1	.	257	441	218	171	698279054589935	961898984902112	601460445284895	506923057083983	0.4819	1002	6075	0.2656	nonDE
105037604	XM_010913274,XM_010913331,XM_010913383,XM_010913441	LOC105037604	PITH domain-containing protein 1, transcript variant X1	protein_coding	XP_010911576.1		751	1271	540	321	204049638131144	277227575920767	148985614887084	951592405403266	0.9028	2002	7396	0.07739	nonDE
105037681	gene-LOC105037681	LOC105037681	.	pseudogene	.	.	310	360	354	238	842282128104591	785223661144581	976683475370885	705542032666596	-0.1259	0.2048	6363	0.7699	nonDE
105037721	XM_010913355,XM_010913361	LOC105037721	NAC domain-containing protein 82, transcript variant X1	protein_coding	XP_010911657.1		162	212	358	184	440160337912722	462409489340698	987719446844002	545461067271654	-0.7988	1441	5.85	0.1494	nonDE
105037749	XM_010913379,XM_010913386	LOC105037749	lysine--tRNA ligase, transcript variant X1	protein_coding	XP_010911681.1		852	1167	1925	941	231491733272617	254543336821035	531106127143772	278955904512297	-0.7542	1477	8256	0.1438	nonDE
105037879	XM_010913501,XM_010913517,XM_029263598,XM_029263600,XM_029263603,XR_002166052	LOC105037879	zinc protease PQQL-like, transcript variant X5	protein_coding	XP_010911803.1		720	1056	884	687	195626816850098	230332273935744	243894969555893	203658561530232	-0.1603	0.3422	7766	0.6399	nonDE
105037882	XM_010913497,XM_010913498,XM_010913499	LOC105037882	putative UDP-glucuronate:xylan alpha-glucuronosyltransferase 3, transcript variant X2	protein_coding	XP_010911799.1		1026	829	1636	1643	27876821401139	180819559746905	451371233250499	487061159525722	-1157	2608	8342	0.04228	downReg
105037895	XM_010913520	LOC105037895	extradiol ring-cleavage dioxygenase	protein_coding	XP_010911822.1	.	1131	2318	1451	3020	30729712480203	50559679070365	400329865187331	895267621282824	-0.6978	0.9167	8925	0.2961	nonDE
105037898	XM_010913524,XM_010913526,XM_010913527,XM_010913528,XM_019848627	LOC105037898	transcriptional activator SPT7, transcript variant X2	protein_coding	XP_010911826.2		312	433	333	281	847716206350427	94444957021001	918744625137018	833013912518124	-0.05688	0.09521	6469	0.894	nonDE
105037902	XM_010913531	LOC105037902	receptor protein-tyrosine kinase CEPR2	protein_coding	XP_010911833.1	.	216	289	122	73	586880450550295	630360105752178	336597129930079	216405749515385	1061	2004	5346	0.07739	nonDE
105037903	XM_010913533	LOC105037903	protein KTI12 homolog	protein_coding	XP_010911835.1	.	205	253	157	114	556993020198197	55183773963772	433161880319856	337948704722655	0.4317	0.8376	5.53	0.3263	nonDE
105037905	XM_010913535,XM_010913536,XM_010913537,XM_029262422,XM_029262423,XM_029262424	LOC105037905	prohibitin-1, mitochondrial, transcript variant X1	protein_coding	XP_010911837.1		159	234	201	171	432009220543967	510395379743978	554557566524146	506923057083983	-0.2602	0.4873	5645	0.5259	nonDE
105037913	XM_010913579	LOC105037913	acyl transferase 5	protein_coding	XP_010911881.1	.	345	221	504	508	937378497406722	482040080869312	139053240561278	150594685964131	-1213	2162	6626	0.0664	nonDE
105037923	XM_029262429	LOC105037923	TOM1-like protein 5	protein_coding	XP_029118262.1	.	184	240	193	130	499935198616918	523482440763054	532485623577912	385380101876712	0.07479	0.1045	5593	0.8846	nonDE
105037924	XM_010913555,XR_830633	LOC105037924	uncharacterized LOC105037924, transcript variant X1	protein_coding	XP_010911857.1	.	132	175	65	49	358649164225181	381705946389727	179334536438157	145258653784299	1093	1762	4.62	0.1018	nonDE
105037932	XM_010913566,XM_019848676,XM_029262469	LOC105037932	AUGMIN subunit 7, transcript variant X1	protein_coding	XP_010911868.1		119	190	115	83	323327655627246	414423598937418	317284179852123	24605037273667	0.3047	0.4365	5005	0.5655	nonDE
105037936	XM_010913570	LOC105037936	serine/threonine-protein kinase SAPK7	protein_coding	XP_010911872.1	.	466	746	339	389	12661402312798	162715792003849	935298582346694	115317584330801	0.3846	0.8264	6933	0.3312	nonDE
105037940	XM_010913575,XM_010913576	LOC105037940	subtilisin-like protease SBT3.9, transcript variant X1	protein_coding	XP_010911877.1		997	1028	599	704	270888800554928	224224978793508	165263672809932	20869814747785	0.3201	0.6748	7742	0.4066	nonDE
105037942	XM_010913578,XM_019848425,XM_029262467,XR_003799740	LOC105037942	DDB1- and CUL4-associated factor homolog 1, transcript variant X4	protein_coding	XP_010911880.1		405	514	630	368	11004008447818	112112489396754	173816550701598	109092213454331	-0.4065	0.8031	6952	0.3408	nonDE
105037944	XM_010913582,XM_010913583	LOC105037944	zinc finger protein STOP1 homolog, transcript variant X2	protein_coding	XP_010911884.1		305	365	730	394	828696932490001	796129545327145	201406479384391	116799815491865	-1015	2099	6804	0.07027	nonDE
105037948	XM_010913587,XM_010913588	LOC105037948	bifunctional aspartate aminotransferase and glutamate/aspartate-prephenate aminotransferase, transcript variant X1	protein_coding	XP_010911889.1		214	204	130	151	581446372304459	444960074648596	358669072876313	447633810641412	0.2482	0.3674	5501	0.6212	nonDE
105037949	XM_019848597	LOC105037949	uncharacterized LOC105037949	protein_coding	XP_019704156.1	.	157	198	227	154	426575142298131	43187301362952	626291381099409	456527197607797	-0.4157	0.7994	5586	0.3425	nonDE
105037950	XM_010913590,XM_010913591,XM_010913592,XR_830635	LOC105037950	probable alkaline/neutral invertase D, transcript variant X4	protein_coding	XP_010911892.1		438	637	644	566	11900631358381	138940964485861	177679140717189	167788567432476	-0.5123	1413	7221	0.1549	nonDE
105037951	XM_010913593	LOC105037951	protein NRT1/ PTR FAMILY 5.10	protein_coding	XP_010911895.1	.	151	189	153	99	410272907560623	412242422100905	422125908846738	293481769890727	0.116	0.1526	5255	0.8274	nonDE
105037954	XM_010913599,XM_010913606	LOC105037954	RNA cytidine acetyltransferase 1, transcript variant X1	protein_coding	XP_010911901.1		288	391	396	252	782507267400394	852840143076476	109256117583862	747044505176396	-0.238	0.4281	6427	0.5714	nonDE
105037971	XM_010913617	LOC105037971	ras-related protein RIC1	protein_coding	XP_010911919.1	.	599	1135	571	486	16275064346279	247563570944194	15753849277875	144072868855448	0.3294	0.6662	7443	0.4116	nonDE
105037975	XM_010913618	LOC105037975	WD repeat-containing protein 36	protein_coding	XP_010911920.2	.	248	266	322	196	673825702483673	580193038512385	888395703585946	581034615137197	-0.3026	0.5146	6069	0.5096	nonDE
105037978	XM_010913623	LOC105037978	mitochondrial import inner membrane translocase subunit TIM44-2	protein_coding	XP_010911925.1	.	178	221	131	83	48363296387941	482040080869312	361428065744593	24605037273667	0.5842	1.04	5251	0.2509	nonDE
105037979	XM_010913629,XM_010913638,XM_010913646,XM_010913653	LOC105037979	60S ribosomal protein L28-2, transcript variant X1	protein_coding	XP_010911931.1		970	1318	581	506	263552794923049	287479107052377	160297485647029	150001793499705	0.7367	2211	7692	0.06271	nonDE
105037981	XM_010913627,XM_010913628,XM_029262471	LOC105037981	TBC1 domain family member 17, transcript variant X2	protein_coding	XP_010911929.1		580	875	431	357	157588269129246	190852973194863	118912592622839	105831304899989	0.5401	1437	7125	0.1504	nonDE
105037985	XM_010913636	LOC105037985	uncharacterized LOC105037985	protein_coding	XP_010911938.1	.	378	634	203	260	102704078846302	138286611434907	560075552260705	770760203753424	0.7813	1673	6.47	0.1112	nonDE
105037992	XM_010913644,XM_019848743	LOC105037992	glycine-rich RNA-binding protein RZ1A, transcript variant X2	protein_coding	XP_010911946.1		322	449	265	336	874886597579607	979348399594214	731133110094024	996059340235194	0.03195	0.04432	6476	0.9496	nonDE
105037994	XM_010913647,XM_010913648	LOC105037994	PH, RCC1 and FYVE domains-containing protein 1, transcript variant X1	protein_coding	XP_010911949.1		268	346	445	340	728166484942033	754687185433403	12277518263843	100791718952371	-0.6775	1757	6507	0.1023	nonDE
105037999	XM_010913659,XM_010913660,XM_010913661,XM_019848575,XM_019848576,XM_019848577,XM_029262476,XM_029262477,XM_029262478,XM_029262479,XR_002164034,XR_830637,XR_830638,XR_830639	LOC105037999	serine/threonine-protein kinase STY46, transcript variant X14	protein_coding	XP_010911961.1		361	544	481	301	98085112337341	118656019906292	132707556964236	892303158960695	-0.1029	0.1575	6761	0.824	nonDE
105038005	NM_001319906,XM_029261651	LOC105038005	actin-3-like	protein_coding	NP_001306835.1		9231	14711	8142	7778	250809881436564	320872924419387	224637199335303	230575879415159	0.2256	0.4723	11.31	0.5375	nonDE
105038008	XM_010913670	LOC105038008	VAMP-like protein YKT61	protein_coding	XP_010911972.1	.	296	468	139	206	804243580383738	102079075948796	383500008690827	610679238358482	0.8322	1596	6052	0.1239	nonDE
105038009	XM_010913671	LOC105038009	fructose-1,6-bisphosphatase, cytosolic	protein_coding	XP_010911973.1	.	224	472	303	182	60861676353364	102951546683401	835974839088638	539532142627397	0.1507	0.186	6191	0.7909	nonDE
105038021	XM_010913689,XM_010913690	LOC105038021	tubby-like F-box protein 8, transcript variant X1	protein_coding	XP_010911991.1		287	460	208	206	779790228277476	100334134479585	573870516602102	610679238358482	0.4955	1112	6.18	0.2293	nonDE
105038022	XM_010913693	LOC105038022	glycerol-3-phosphate acyltransferase 9	protein_coding	XP_010911995.2	.	1318	1825	1306	1101	358105756400597	398064772663572	360324468597281	326387301666354	0.0482	0.09199	8492	0.8965	nonDE
105038024	XM_010913694	LOC105038024	UPF0496 protein 4	protein_coding	XP_010911996.1	.	77	88	113	206	209212012464689	19194356161312	311766194115565	610679238358482	-1196	1546	4893	0.1329	nonDE
105038027	XM_010913703,XM_029262482	LOC105038027	cellulose synthase A catalytic subunit 2 [UDP-forming], transcript variant X1	protein_coding	XP_010912005.1		870	858	844	1082	236382403693869	187144972572792	232858998082776	32075482325431	-0.4709	0.9891	7906	0.2696	nonDE
105038029	XM_010913705	LOC105038029	U3 small nucleolar RNA-associated protein 18 homolog	protein_coding	XP_010912007.1	.	86	105	168	143	233665364570951	229023567833836	463510801870928	423918112064383	-1034	2038	5007	0.07532	nonDE
105038030	XM_010913706	LOC105038030	60S ribosomal protein L3	protein_coding	XP_010912008.1	.	4144	4774	4931	4046	112594101253723	104129382175118	136045938334854	119942145553321	-0.3274	0.8146	10.2	0.3362	nonDE
105038031	XM_010913710,XM_029262483	LOC105038031	protein FAM98B, transcript variant X2	protein_coding	XP_010912012.1		103	139	103	71	279855029660558	303183580275269	284176265432771	210476824871127	0.1519	0.178	4746	0.7981	nonDE
105038032	XM_010913712,XM_010913713	LOC105038032	polypyrimidine tract-binding protein homolog 3, transcript variant X1	protein_coding	XP_010912014.1		916	1050	587	542	248880783659292	229023567833836	161952881367997	160673857859368	0.4746	1317	7618	0.1775	nonDE
105038033	XM_010913714,XM_010913715,XM_029262484	LOC105038033	protein LIKE COV 2, transcript variant X2	protein_coding	XP_010912016.1		154	250	66	132	418424024929377	545294209128181	182093529306436	391309026520969	0.7914	1.07	5164	0.2413	nonDE
105038035	XM_019848641	LOC105038035	protein S-acyltransferase 8	protein_coding	XP_019704200.1	.	104	145	143	129	282572068783476	316270641294345	394535980163945	382415639554584	-0.4602	0.8356	5096	0.3272	nonDE
105038036	XM_010913720	LOC105038036	ribonucleoside-diphosphate reductase large subunit	protein_coding	XP_010912022.1	.	167	234	207	242	453745533527312	510395379743978	571111523733822	71739988195511	-0.4923	1024	5798	0.2577	nonDE
105038038	XM_010913722	LOC105038038	DNA polymerase alpha catalytic subunit	protein_coding	XP_010912024.1	.	89	199	165	155	241816481939705	434054190466032	45523382326609	459491659929926	-0.5332	0.841	5272	0.325	nonDE
105038039	XM_010913723	LOC105038039	nicotinate phosphoribosyltransferase 2	protein_coding	XP_010912025.1	.	104	206	175	134	282572068783476	449322428321622	482823751948884	397237951165226	-0.3565	0.5476	5309	0.4855	nonDE
105038041	XM_010913726	LOC105038041	40S ribosomal protein S10-1	protein_coding	XP_010912028.1	.	827	891	530	516	224699135465321	194342856133284	146226622018805	152966255821833	0.3901	0.9755	7467	0.2748	nonDE
105038049	XM_010913738,XM_010913739,XM_029262486,XM_029262487,XR_003799749	LOC105038049	uncharacterized LOC105038049, transcript variant X1	protein_coding	XP_010912040.1		136	240	134	93	369517320716853	523482440763054	369705044349431	275694995957956	0.3766	0.5711	5233	0.4712	nonDE
105038050	XM_010913741	LOC105038050	magnesium transporter MRS2-F	protein_coding	XP_010912043.1	.	503	627	504	470	136667067882777	136759787649348	139053240561278	139329729140042	-0.117	0.2325	7109	0.7427	nonDE
105038055	XM_010913746	LOC105038055	sister chromatid cohesion protein PDS5 homolog A	protein_coding	XP_010912048.1	.	1101	1866	1554	907	299146007433276	407007597693275	428747491730609	26887673261706	-0.05145	0.07032	8428	0.9209	nonDE
105038056	XM_010913748	LOC105038056	small glutamine-rich tetratricopeptide repeat-containing protein	protein_coding	XP_010912050.1	.	443	407	519	172	120364833145269	887738972460679	143191729863697	509887519406111	0.163	0.144	6557	0.8381	nonDE
105038067	XM_010913757	LOC105038067	BTB/POZ domain-containing protein At1g21780	protein_coding	XP_010912059.1	.	182	227	138	153	494501120371082	495127141888389	380741015822548	453562735285669	0.1666	0.2612	5507	0.7133	nonDE
105038077	XM_010913767,XM_010913773,XM_019855176	LOC105038077	DEAD-box ATP-dependent RNA helicase 56, transcript variant X1	protein_coding	XP_010912069.1		2111	2545	2369	1981	573566958847997	555109504892489	653605410495374	587259986013667	-0.2242	0.541	9208	0.49	nonDE
105038079	XM_010913798	LOC105038079	uncharacterized LOC105038079	protein_coding	XP_010912100.1	.	155	142	72	109	421141064052295	309727110784807	198647486516112	323126393112012	0.4107	0.5002	4925	0.5193	nonDE
105038080	XM_010913768	LOC105038080	E3 ubiquitin-protein ligase PUB23-like	protein_coding	XP_010912070.1	.	24	9	175	222	652089389500328	196305915286145	482823751948884	658110635512539	-4.08	3408	3857	0.02056	downReg
105038092	XM_010913787	LOC105038092	ubiquitin carboxyl-terminal hydrolase 6	protein_coding	XP_010912089.1	.	716	963	712	609	194540001200931	210047329356175	196440292221489	180535755417629	0.01182	0.02071	7609	0.9763	nonDE
105038099	XM_010913785,XM_019848439	LOC105038099	pyruvate, phosphate dikinase 2, transcript variant X2	protein_coding	XP_010912087.1		137	226	252	55	372234359839771	492945965051876	695266202806392	163045427717071	0.2071	0.1433	5253	0.8385	nonDE
105038105	XM_010913794,XM_019848442	LOC105038105	sugar transporter ERD6-like 16, transcript variant X1	protein_coding	XP_010912096.1		257	183	458	302	698279054589935	399155361081829	126361873367194	895267621282824	-1.13	2022	6.23	0.0765	nonDE
105038107	XM_010913795,XM_029262491,XR_002164004,XR_003799760,XR_830653	LOC105038107	sugar transporter ERD6-like 5, transcript variant X2	protein_coding	XP_010912097.1		120	196	119	94	326044694750164	427510659956494	328320151325241	278659458280084	0.2244	0.3138	5076	0.6652	nonDE
105038109	XM_010913800,XM_010913802,XM_029262492,XR_830654,XR_830656	LOC105038109	autophagy-related protein 18h, transcript variant X1	protein_coding	XP_010912102.1		198	354	306	179	537973746337771	772136600125505	844251817693476	530638755661011	-0.1431	0.1906	6.04	0.785	nonDE
105038110	XM_010913804	LOC105038110	probable prolyl 4-hydroxylase 4	protein_coding	XP_010912106.1	.	312	363	188	155	847716206350427	791767191654119	518690659236515	459491659929926	0.6496	1553	5986	0.1314	nonDE
105038112	XM_010913805,XM_019848790	LOC105038112	proteasome subunit beta type-5, transcript variant X1	protein_coding	XP_010912107.1		246	417	219	240	668391624237836	909550740825807	604219438153174	711470957310853	0.169	0.2755	6163	0.6996	nonDE
105038113	XM_010913809	LOC105038113	sericin 1	protein_coding	XP_010912111.1	.	451	632	640	513	122538464443603	137850376067604	176575543569877	152076917125195	-0.4237	1112	7191	0.2293	nonDE
105038114	XM_010913806	LOC105038114	transcription factor 25	protein_coding	XP_010912108.1	.	698	932	778	495	189649330779679	203285681162986	214649645152132	146740884945363	0.05167	0.08159	7545	0.9077	nonDE
105038118	XM_010913812	LOC105038118	calcium-dependent protein kinase 8	protein_coding	XP_010912114.1	.	229	92	349	355	62220195914823	200668268959171	962888511029488	105238412435564	-1699	2.18	5902	0.06487	nonDE
105038120	XM_010913815	LOC105038120	probable E3 ubiquitin-protein ligase ARI8	protein_coding	XP_010912117.1	.	284	527	276	244	771639110908722	114948019284221	761482031645096	723328806599367	0.2628	0.4711	6388	0.5384	nonDE
105038123	XM_010913820	LOC105038123	ferrochelatase-1, chloroplastic	protein_coding	XP_010912122.1	.	319	288	272	216	866735480210853	628178928915665	750446060171979	640323861579768	-0.01143	0.01462	6163	0.9825	nonDE
105038124	XM_010913818	LOC105038124	probable glutathione peroxidase 2	protein_coding	XP_010912120.3	.	443	521	179	146	120364833145269	113639313182313	493859723422001	432811499030769	1.24	3039	6203	0.02695	upReg
105038129	XM_010913829	LOC105038129	PTI1-like tyrosine-protein kinase 1	protein_coding	XP_010912131.1	.	490	578	496	476	133134917022984	126072021150436	136846046266655	141108406533319	-0.1933	0.4143	7069	0.5823	nonDE
105038132	XM_010913839	LOC105038132	probable methyltransferase PMT19	protein_coding	XP_010912141.1	.	120	134	56	92	326044694750164	292277696092705	154503600623643	272730533635827	0.5041	0.6172	4662	0.4421	nonDE
105038133	XM_010913840,XM_019848706,XM_019848707,XM_019848708,XM_019848709,XM_019848710,XM_019848712,XM_019848713,XM_019848714,XM_019848715,XM_019848716,XM_019848717,XM_019848718,XM_019848719,XM_029262495,XM_029262496,XM_029262497,XM_029262498,XM_029262499	LOC105038133	uncharacterized protein At3g49140, transcript variant X6	protein_coding	XP_010912142.2		179	253	83	75	486350003002328	55183773963772	228996408067185	222334674159642	1108	2107	5102	0.06971	nonDE
105038134	XM_010913845	LOC105038134	transcription factor bHLH13	protein_coding	XP_010912147.1	.	100	145	192	131	271703912291803	316270641294345	529726630709632	388344564198841	-0.7168	1361	5194	0.1667	nonDE
105038135	XM_010913841,XM_010913842,XR_003799763	LOC105038135	phospholipase A(1) LCAT3, transcript variant X2	protein_coding	XP_010912143.1		333	403	210	170	904774027931706	879014265114628	57938850233866	503958594761854	0.6265	1.54	6.12	0.1337	nonDE
105038136	XM_010913844,XM_029262500	LOC105038136	2,3-dimethylmalate lyase, transcript variant X1	protein_coding	XP_010912146.1		86	130	97	93	233665364570951	283552988746654	267622308223095	275694995957956	-0.1506	0.1802	4732	0.7963	nonDE
105038138	XM_010913847,XM_029262502,XM_029262503	LOC105038138	formin-like protein 18, transcript variant X3	protein_coding	XP_010912149.1		124	126	108	90	336912851241836	274828281400603	297971229774168	26680160899157	-0.009107	0.009544	4879	0.9887	nonDE
105038140	XM_010913852,XM_010913853	LOC105038140	protein ROOT INITIATION DEFECTIVE 3, transcript variant X1	protein_coding	XP_010912154.1		133	178	165	103	361366203348099	388249476899265	45523382326609	305339619179241	-0.09751	0.1228	5229	0.8649	nonDE
105038141	XM_010913856	LOC105038141	B2 protein	protein_coding	XP_010912158.1	.	1996	1448	1737	1183	54232100893444	315834405927043	47923706122012	350695892707808	-0.07348	0.08888	8687	0.8998	nonDE
105038142	XM_010913854	LOC105038142	WRKY transcription factor WRKY71	protein_coding	XP_010912156.1	.	0	0	355	223	0	0	979442468239164	661075097834668	-9465	5862	1647	0.004081	downReg
105038143	XM_010913855	LOC105038143	CBL-interacting protein kinase 6	protein_coding	XP_010912157.3	.	318	323	596	338	864018441087935	70452011819361	164435974949448	100198826487945	-0.82	1653	6647	0.1145	nonDE
105038153	XM_010913862,XM_010913863,XM_010913864,XM_010913865,XM_010913866,XM_019848587	LOC105038153	probable protein phosphatase 2C 11, transcript variant X1	protein_coding	XP_010912164.1		1009	1648	875	686	27414924750243	359457942657297	241411875974442	203362115298019	0.4103	1.03	8044	0.2552	nonDE
105038157	XM_010913879,XM_019851271	LOC105038157	auxin response factor 11, transcript variant X1	protein_coding	XP_010912181.1		85	108	100	95	230948325448033	235567098343374	275899286827933	281623920602213	-0.3469	0.4868	4.68	0.5261	nonDE
105038158	XM_010913869,XM_010913870,XM_029262506	LOC105038158	nuclear nucleic acid-binding protein C1D, transcript variant X1	protein_coding	XP_010912171.1		160	171	115	113	434726259666886	372981239043676	317284179852123	334984242400527	0.2028	0.2935	5185	0.6831	nonDE
105038161	XM_019847983	LOC105038161	uncharacterized LOC105038161	protein_coding	XP_019703542.1	.	141	225	76	44	383102516331443	490764788215363	209683457989229	130436342173656	1287	1959	4752	0.08203	nonDE
105038166	XM_010913878,XR_830670,XR_830671	LOC105038166	transmembrane 9 superfamily member 8, transcript variant X2	protein_coding	XP_010912180.1	.	665	620	640	656	180683101674049	135232963863789	176575543569877	194468728331633	-0.3431	0.7228	7412	0.3785	nonDE
105038170	XM_010913881,XM_010913882	LOC105038170	ras-related protein RABB1c, transcript variant X1	protein_coding	XP_010912183.1		434	691	459	501	117919497934643	150719319403029	126637772654021	148519562338641	-0.1229	0.216	7081	0.7586	nonDE
105038171	XM_019848461	LOC105038171	enhancer of mRNA-decapping protein 4	protein_coding	XP_019704020.1	.	1227	1757	1297	934	333380700382043	383232770175286	35784137501583	276880780886807	0.09276	0.1747	8.39	0.802	nonDE
105038173	XM_010913888	LOC105038173	PP2A regulatory subunit TAP46	protein_coding	XP_010912190.1	.	155	177	94	103	421141064052295	386068300062752	259345329618257	305339619179241	0.4255	0.6924	5.08	0.3965	nonDE
105038179	XM_010913893	LOC105038179	pyruvate kinase 1, cytosolic	protein_coding	XP_010912195.1	.	2313	2471	2216	3308	628451149130941	538968796302295	611392819610701	980644136160126	-0.5024	0.9508	9391	0.2842	nonDE
105038184	XM_019848418,XM_029262507	LOC105038184	BTB/POZ domain-containing protein At3g44820, transcript variant X2	protein_coding	XP_019703977.1		309	483	332	221	839565088981673	105350841203565	915985632268739	655146173190411	0.1907	0.3258	6418	0.655	nonDE
105038188	XM_010913904,XM_010913905	LOC105038188	phosphatidylinositol-3-phosphatase myotubularin-1, transcript variant X1	protein_coding	XP_010912206.1		202	235	219	155	548841902829443	512576556580491	604219438153174	459491659929926	-0.09215	0.1369	5728	0.8462	nonDE
105038190	XM_019848680	LOC105038190	uncharacterized LOC105038190	protein_coding	XP_019704239.1	.	190	230	385	340	516237433354427	501670672397927	106221225428754	100791718952371	-1116	2874	6184	0.03196	downReg
105038192	XM_010913910,XM_010913911,XM_019848615,XR_830674,XR_830675	LOC105038192	DNA repair protein RAD5A, transcript variant X4	protein_coding	XP_010912212.1		139	82	193	129	377668438085607	178856500594044	532485623577912	382415639554584	-0.9723	1351	5104	0.1689	nonDE
105038194	XM_010913915	LOC105038194	AT-hook motif nuclear-localized protein 10	protein_coding	XP_010912217.1	.	125	203	170	108	339629890364754	442778897812083	469028787607487	320161930789884	-0.08752	0.1071	5282	0.8816	nonDE
105038199	XM_010913922,XM_029262512,XM_029262513	LOC105038199	glucomannan 4-beta-mannosyltransferase 9, transcript variant X1	protein_coding	XP_010912224.1		240	344	153	335	652089389500328	750324831760378	422125908846738	993094877913066	0.03964	0.03485	6075	0.9597	nonDE
105038201	XM_010913926	LOC105038201	histone deacetylase HDT2	protein_coding	XP_010912228.1	.	226	141	177	230	614050841779476	307545933948294	488341737685442	681826334089568	-0.5354	0.6917	5.65	0.3967	nonDE
105038202	XM_029262514,XM_029262515,XM_029262516,XR_003799768	LOC105038202	protein ROS1A-like, transcript variant X4	protein_coding	XP_029118347.1		201	402	303	350	546124863706525	876833088278116	835974839088638	103756181274499	-0.5046	0.9277	6329	0.2924	nonDE
105038203	XM_010913928	LOC105038203	arogenate dehydratase/prephenate dehydratase 6, chloroplastic	protein_coding	XP_010912230.1	.	225	115	433	391	611333802656558	250835336198963	119464391196495	115910476795227	-1744	2639	6088	0.04053	downReg
105038211	XM_010913937	LOC105038211	fructose-bisphosphate aldolase 1, cytoplasmic	protein_coding	XP_010912239.1	.	747	1030	324	446	202962822481977	224661214160811	893913689322504	132215019566934	0.8888	2066	7253	0.07326	nonDE
105038218	XM_010913944,XM_010913945,XM_010913946,XM_019848766	LOC105038218	serine/threonine-protein kinase D6PKL1, transcript variant X4	protein_coding	XP_010912246.1		133	201	79	74	361366203348099	438416544139058	217960436594067	219370211837513	0.7818	1347	4.89	0.1696	nonDE
105038219	XM_010913947	LOC105038219	probable glycosyltransferase 2	protein_coding	XP_010912249.1	.	222	242	288	205	603182685287804	52784479443608	794589946064448	607714776036354	-0.4015	0.8167	5972	0.335	nonDE
105038221	XM_010913949,XM_019848662	LOC105038221	protein BUD31 homolog 2, transcript variant X1	protein_coding	XP_010912251.1		310	412	225	223	842282128104591	898644856643243	62077339536285	661075097834668	0.3528	0.7916	6225	0.3466	nonDE
105038222	XM_010913950	LOC105038222	IQ domain-containing protein IQM3	protein_coding	XP_010912252.1	.	173	168	315	222	47004776826482	366437708534138	86908275350799	658110635512539	-0.977	2101	5811	0.07006	nonDE
105038225	XM_010913952,XM_010913953,XM_019847126,XM_019847129	LOC105038225	copper transport protein ATX1, transcript variant X1	protein_coding	XP_010912254.1		159	335	79	135	432009220543967	730694240231763	217960436594067	400202413487355	0.8816	1199	5353	0.2047	nonDE
105038230	XM_010913957	LOC105038230	zinc finger A20 and AN1 domain-containing stress-associated protein 5	protein_coding	XP_010912259.1	.	52	44	103	103	141286034391738	959717808065599	284176265432771	305339619179241	-1454	2019	4222	0.07653	nonDE
105038231	XM_010913958	LOC105038231	R3H domain-containing protein 1	protein_coding	XP_010912260.1	.	123	146	162	148	334195812118918	318451818130858	446956844661252	438740423675026	-0.5384	1076	5253	0.2394	nonDE
105038235	XM_010913967,XM_010913969,XM_029262524	LOC105038235	probable sodium/metabolite cotransporter BASS4, chloroplastic, transcript variant X3	protein_coding	XP_010912269.1		72	157	111	55	195626816850098	342444763332498	306248208379006	163045427717071	0.1456	0.1239	4596	0.8637	nonDE
105038237	XM_010913971	LOC105038237	uncharacterized LOC105038237	protein_coding	XP_010912273.1	.	586	983	569	499	159218492602997	214409683029201	156986694205094	147926669874215	0.1928	0.3889	7392	0.6038	nonDE
105038241	XM_010913975	LOC105038241	ACT domain-containing protein ACR12	protein_coding	XP_010912277.1	.	158	160	203	158	429292181421049	348988293842036	560075552260705	468385046896312	-0.5165	1016	5481	0.2607	nonDE
105038242	XM_010913976,XM_010913977,XM_010913978,XM_010913979,XM_010913980,XM_010913982	LOC105038242	uncharacterized LOC105038242, transcript variant X1	protein_coding	XP_010912278.1		461	507	826	666	125255503566521	110585665611195	227892810919873	197433190653762	-0.9456	2629	7305	0.04095	downReg
105038245	XM_010913984,XM_029262528,XR_003799772,XR_003799773	LOC105038245	transcription factor TGAL5, transcript variant X3	protein_coding	XP_010912286.1		890	1172	885	552	241816481939705	255633925239291	244170868842721	163638320181496	0.2202	0.4297	7801	0.5702	nonDE
105038253	XM_010913997	LOC105038253	40S ribosomal protein S25	protein_coding	XP_010912299.1	.	333	286	261	234	904774027931706	62381657524264	720097138620906	693684183378082	-0.01259	0.01576	6.19	0.981	nonDE
105038263	XM_010914009,XM_029263731	LOC105038263	putative aminoacrylate hydrolase RutD, transcript variant X1	protein_coding	XP_010912311.1		198	165	299	255	537973746337771	3598941780246	824938867615521	755937892142781	-0.9595	2001	5885	0.07739	nonDE
105038265	XM_010914010	LOC105038265	40S ribosomal protein S14	protein_coding	XP_010912312.1	.	341	325	230	194	92651034091505	708882471866636	634568359704247	57510569049294	0.3236	0.6102	6131	0.4463	nonDE
105038276	XM_010914029,XM_019846101	LOC105038276	uncharacterized LOC105038276, transcript variant X1	protein_coding	XP_010912331.1		106	240	184	138	288006147029312	523482440763054	507654687763398	409095800453741	-0.2848	0.3792	5399	0.6109	nonDE
105038277	XM_010914026,XM_010914030	LOC105038277	nicalin, transcript variant X2	protein_coding	XP_010912328.1		273	397	231	196	741751680556623	865927204095552	637327352572526	581034615137197	0.3075	0.6527	6129	0.42	nonDE
105038286	XM_010914040,XM_010914041,XM_029262538,XM_029262539,XR_003799781,XR_830695,XR_830696	LOC105038286	MTOR-associated protein MEAK7, transcript variant X4	protein_coding	XP_010912342.1		117	156	135	116	31789357738141	340263586495985	37246403721771	343877629366912	-0.2119	0.3218	5106	0.6587	nonDE
105038291	XM_010914052	LOC105038291	ubiquitin-conjugating enzyme E2 variant 1D	protein_coding	XP_010912354.1	.	135	175	165	176	366800281593935	381705946389727	45523382326609	521745368694626	-0.4664	0.9283	5421	0.2924	nonDE
105038292	XM_010914056,XM_019853611,XM_029263748,XR_002165703	LOC105038292	uncharacterized LOC105038292, transcript variant X3	protein_coding	XP_010912358.1		784	1071	816	681	213015867236774	233604039190513	225133818051594	201879884136955	-0.02521	0.04556	7.77	0.948	nonDE
105038301	XM_010914068	LOC105038301	protein NLP3	protein_coding	XP_010912370.2	.	249	235	173	235	676542741606591	512576556580491	477305766212325	69664864570021	-0.06339	0.07572	5868	0.9145	nonDE
105038310	XM_010914074	LOC105038310	two-component response regulator-like APRR3	protein_coding	XP_010912376.1	.	188	240	196	144	510803355108591	523482440763054	54076260218275	426882574386512	0.008256	0.01105	5643	0.9871	nonDE
105038316	XM_010914080	LOC105038316	digalactosyldiacylglycerol synthase 1, chloroplastic	protein_coding	XP_010912382.1	.	152	175	107	106	412989946683541	381705946389727	295212236905889	314233006145627	0.2856	0.4446	5126	0.5577	nonDE
105038317	XM_010914081,XM_010914082,XR_830701	LOC105038317	transcription factor LHW, transcript variant X3	protein_coding	XP_010912383.2		184	198	157	114	499935198616918	43187301362952	433161880319856	337948704722655	0.1694	0.2489	5403	0.7254	nonDE
105038321	XM_010914088,XM_010914089,XR_003799788	LOC105038321	uncharacterized LOC105038321, transcript variant X2	protein_coding	XP_010912390.1		354	533	420	386	961831849512984	116256725386128	115877700467732	114428245634162	-0.2084	0.433	6788	0.5682	nonDE
105038328	XM_010914097,XM_010914098	LOC105038328	PH, RCC1 and FYVE domains-containing protein 1, transcript variant X1	protein_coding	XP_010912399.1		440	653	619	599	119549721408394	142430847424281	170781658546491	1775712930955	-0.5017	1352	7237	0.1684	nonDE
105038335	XM_010914104	LOC105038335	actin-101	protein_coding	XP_010912406.1	.	810	1043	479	648	220080168956361	227496744048277	13215575839058	19209715847393	0.4041	0.8497	7562	0.3215	nonDE
105038336	XM_010914106	LOC105038336	histone H3.2	protein_coding	XP_010912408.1	.	135	227	123	140	366800281593935	495127141888389	339356122798358	415024725097998	0.1185	0.1549	5327	0.826	nonDE
105038338	XM_010914109	LOC105038338	ubiquitin carboxyl-terminal hydrolase MINDY-3	protein_coding	XP_010912411.1	.	119	192	239	172	323327655627246	418785952610443	659399295518761	509887519406111	-0.7319	1.53	5534	0.1354	nonDE
105038342	XM_010914113,XM_010914116	LOC105038342	exocyst complex component SEC5B, transcript variant X1	protein_coding	XP_010912415.1		448	554	393	393	121723352706728	120837196742805	108428419723378	116503369259652	0.01915	0.03095	6869	0.9631	nonDE
105038348	XM_010914129,XM_010914130	LOC105038348	tubby-like F-box protein 14, transcript variant X1	protein_coding	XP_010912431.1		153	221	247	181	415706985806459	482040080869312	681471238464996	536567680305268	-0.5216	1122	5705	0.2277	nonDE
105038350	XM_010914132,XM_010914133,XM_010914134,XM_010914136,XR_003799794	LOC105038350	protein FAM135B, transcript variant X4	protein_coding	XP_010912434.1		536	903	307	303	145633296988407	196960268337099	847010810561756	898232083604952	0.8734	2207	6927	0.06287	nonDE
105038358	XM_010914145	LOC105038358	60S ribosomal protein L3	protein_coding	XP_010912447.1	.	200	300	194	265	543407824583607	654353050953818	535244616446191	785582515364067	-0.1983	0.2979	5962	0.6798	nonDE
105038359	XM_010914146,XM_010914147	LOC105038359	COP9 signalosome complex subunit 8, transcript variant X1	protein_coding	XP_010912448.1		102	115	81	108	27713799053764	250835336198963	223478422330626	320161930789884	-0.1091	0.1146	4738	0.8739	nonDE
105038362	XM_010914154,XM_019854472	LOC105038362	importin subunit beta-1, transcript variant X1	protein_coding	XP_010912456.1		973	1260	1101	1092	264367906659925	274828281400603	303765114797555	323719285576438	-0.3086	0.8192	8184	0.3338	nonDE
105038366	XM_010914155	LOC105038366	U-box domain-containing protein 25-like	protein_coding	XP_010912457.2	.	47	9	225	123	127700838777148	196305915286145	62077339536285	364628865621812	-3425	2567	3974	0.04378	downReg
105038368	XM_010914157,XM_029262557	LOC105038368	40S ribosomal protein S10-1, transcript variant X1	protein_coding	XP_010912459.1		223	258	196	230	605899724410722	562743623820283	54076260218275	681826334089568	-0.1459	0.2319	5899	0.7433	nonDE
105038382	XM_010914175,XM_019848677,XR_830722	LOC105038382	long chain acyl-CoA synthetase 9, chloroplastic, transcript variant X3	protein_coding	XP_010912477.1		133	109	228	178	361366203348099	237748275179887	629050373967688	527674293338883	-1112	2101	5366	0.07006	nonDE
105038391	XM_010914189	LOC105038391	serine/threonine-protein kinase SAPK7	protein_coding	XP_010912491.2	.	67	79	101	106	182041621235508	172312970084505	278658279696213	314233006145627	-0.8303	1296	4525	0.1809	nonDE
105038397	XM_010914198	LOC105038397	mitochondrial import inner membrane translocase subunit PAM16 like 2	protein_coding	XP_010912500.1	.	137	141	80	58	372234359839771	307545933948294	220719429462347	171938814683456	0.6705	0.9896	4.69	0.2694	nonDE
105038409	XM_010914214	LOC105038409	uncharacterized LOC105038409	protein_coding	XP_010912516.2	.	73	64	174	191	198343855973017	139595317536814	480064759080604	566212303526554	-1763	2855	4888	0.03275	downReg
105038410	XM_010914216,XM_010914217	LOC105038410	zinc finger transcription factor YY1, transcript variant X2	protein_coding	XP_010912518.1		99	128	157	106	268986873168885	279190635073629	433161880319856	314233006145627	-0.5312	0.8906	4997	0.3049	nonDE
105038412	XM_010914220	LOC105038412	transmembrane 9 superfamily member 1	protein_coding	XP_010912522.1	.	703	765	684	693	191007850341138	166860027993224	188715112190306	205437238923509	-0.2344	0.521	7552	0.5056	nonDE
105038413	XM_010914223,XM_029262564	LOC105038413	threonylcarbamoyladenosine tRNA methylthiotransferase, transcript variant X2	protein_coding	XP_010912525.1		257	377	189	168	698279054589935	822303667365298	521449652104794	498029670117597	0.4832	1103	5961	0.232	nonDE
105038414	XM_010914224	LOC105038414	patellin-3	protein_coding	XP_010912526.1	.	612	720	380	594	166282794322584	157044732228916	104841728994615	176089061934436	0.1641	0.2331	7213	0.742	nonDE
105038419	XM_010914231	LOC105038419	serine hydroxymethyltransferase 7	protein_coding	XP_010912533.1	.	120	114	99	75	326044694750164	248654159362451	273140293959654	222334674159642	0.07753	0.07998	4735	0.909	nonDE
105038424	XM_010914235,XM_029262565,XR_002164042,XR_003799797	LOC105038424	ABC transporter D family member 1, transcript variant X4	protein_coding	XP_010912537.1		813	735	1228	1072	220895280693236	160316497483685	338804324224702	317790360932181	-0.8998	2289	7958	0.05768	nonDE
105038426	XM_010914237	LOC105038426	SWI/SNF complex subunit SWI3C	protein_coding	XP_010912539.1	.	175	175	177	155	475481846510656	381705946389727	488341737685442	459491659929926	-0.2608	0.4401	5494	0.562	nonDE
105038428	XM_010914239,XM_010914240	LOC105038428	NAC domain-containing protein 48, transcript variant X2	protein_coding	XP_010912541.1		307	464	283	287	834131010735837	10120660521419	780794981723052	850800686450895	0.08764	0.1462	6437	0.8355	nonDE
105038429	XM_019848768	LOC105038429	probable L-ascorbate peroxidase 6, chloroplastic/mitochondrial	protein_coding	XP_019704327.1	.	71	129	156	171	19290977772718	281371811910142	430402887451576	506923057083983	-1051	1894	5.05	0.08855	nonDE
105038430	XR_002163869	LOC105038430	DNA-directed RNA polymerase subunit 10-like protein	lncRNA	.	.	166	148	82	85	451028494404394	322814171803883	226237415198905	251979297380927	0.559	0.8043	4922	0.3406	nonDE
105038431	XM_010914243	LOC105038431	isocitrate dehydrogenase [NAD] catalytic subunit 5, mitochondrial	protein_coding	XP_010912545.1	.	324	397	244	217	880320675825443	865927204095552	673194259860158	643288323901896	0.3149	0.6974	6247	0.3934	nonDE
105038433	XM_010914245,XM_010914247,XM_010914248,XM_010914250,XM_010914251,XM_019847761,XM_029262567	LOC105038433	probable anion transporter 6, transcript variant X7	protein_coding	XP_010912547.1		118	145	94	158	320610616504328	316270641294345	259345329618257	468385046896312	-0.1992	0.2203	5064	0.7542	nonDE
105038456	XM_019848013	LOC105038456	WD repeat-containing protein 20-like	protein_coding	XP_019703572.1	.	164	144	76	95	445594416158558	314089464457833	209683457989229	281623920602213	0.5112	0.6846	4921	0.4	nonDE
105038457	XM_010914269	LOC105038457	malate dehydrogenase, mitochondrial	protein_coding	XP_010912571.1	.	371	310	181	272	100802151460259	676164819318945	49937770915856	806333751618967	0.2874	0.3776	6.18	0.6122	nonDE
105038463	XM_010914305	LOC105038463	N-terminal acetyltransferase A complex auxiliary subunit NAA15	protein_coding	XP_010912607.1	.	889	1411	1015	729	241544778027413	307764051631946	280037776130352	216109303283172	0.05641	0.09509	8017	0.8941	nonDE
105038476	XM_010914283	LOC105038476	GDSL esterase/lipase At1g31550	protein_coding	XP_010912585.1	.	209	207	381	216	567861176689869	451503605158134	105117628281443	640323861579768	-0.8036	1524	6013	0.1358	nonDE
105038477	XM_010914280	LOC105038477	TOM1-like protein 4	protein_coding	XP_010912582.1	.	454	467	407	504	123353576180479	101860958265144	112291009738969	149408901035279	-0.3016	0.5629	6914	0.4754	nonDE
105038493	XM_010914312,XM_010914313	LOC105038493	mitogen-activated protein kinase kinase kinase 3, transcript variant X2	protein_coding	XP_010912614.1		633	837	517	461	171988576480712	182564501216115	142639931290042	136661713050126	0.2535	0.6133	7299	0.4448	nonDE
105038499	XM_010914321	LOC105038499	GDP-L-galactose phosphorylase 1	protein_coding	XP_010912623.1	.	84	90	169	179	228231286325115	196305915286145	466269794739208	530638755661011	-1333	2485	5026	0.04775	downReg
105038500	XM_010914323	LOC105038500	phosphatidylinositol 4-kinase beta 1	protein_coding	XP_010912625.1	.	322	447	342	438	874886597579607	974986045921188	943575560951532	129843449709231	-0.3449	0.6745	6662	0.4066	nonDE
105038501	XM_010914324,XR_003799804,XR_003799805	LOC105038501	probable inactive ATP-dependent zinc metalloprotease FTSHI 4, chloroplastic, transcript variant X3	protein_coding	XP_010912626.1	.	193	239	179	92	524388550723181	521301263926541	493859723422001	272730533635827	0.3918	0.5897	5458	0.4596	nonDE
105038505	XM_010914328	LOC105038505	alcohol dehydrogenase 1	protein_coding	XP_010912630.1	.	334	279	267	158	907491067054624	60854833738705	736651095830582	468385046896312	0.2286	0.3051	6049	0.6732	nonDE
105038509	XM_010914333,XM_029262572	LOC105038509	DAG protein, chloroplastic, transcript variant X2	protein_coding	XP_010912635.1		248	282	222	204	673825702483673	615091867896589	612496416758012	604750313714225	-0.01324	0.01919	5971	0.9772	nonDE
105038510	XM_010914334,XM_019848671,XM_029262573,XM_029262574	LOC105038510	uncharacterized protein At4g06598, transcript variant X2	protein_coding	XP_010912636.1		586	598	842	595	159218492602997	130434374823461	23230719950912	176385508166649	-0.5896	1439	7417	0.1499	nonDE
105038511	XM_019848699	LOC105038511	serine/arginine-rich splicing factor SR45	protein_coding	XP_019704258.1	.	107	139	98	122	29072318615223	303183580275269	270381301091375	361664403299684	-0.1516	0.1857	4936	0.791	nonDE
105038513	XM_010914339	LOC105038513	DNA mismatch repair protein MLH1	protein_coding	XP_010912641.1	.	401	550	488	349	108953268829013	1199647260082	134638851972032	103459735042287	-0.1378	0.253	6862	0.7219	nonDE
105038515	XM_029262575	LOC105038515	receptor protein-tyrosine kinase CEPR2	protein_coding	XP_029118408.1	.	2004	2715	1386	1560	544494640232774	592189511113205	382396411543516	462456122252055	0.3422	0.8398	8933	0.3253	nonDE
105038520	XM_019848517,XM_029262577	LOC105038520	MACPF domain-containing protein At4g24290, transcript variant X2	protein_coding	XP_019704076.1		430	609	388	327	116832682285475	132833669343625	107048923289238	969379179336037	0.2013	0.4249	6817	0.5742	nonDE
105038524	XM_019848770	LOC105038524	immune-associated nucleotide-binding protein 9	protein_coding	XP_019704329.1	.	208	282	104	90	565144137566951	615091867896589	286935258301051	26680160899157	0.997	2067	5341	0.07326	nonDE
105038525	XM_010914355,XM_010914356,XM_019848554,XR_003799806	LOC105038525	cullin-associated NEDD8-dissociated protein 1, transcript variant X1	protein_coding	XP_010912657.1		748	1230	624	603	203234526394269	268284750891065	17216115498063	178757078024352	0.3245	0.7634	7662	0.3592	nonDE
105038527	XM_010914359,XM_010914360	LOC105038527	protein SUPPRESSOR OF GENE SILENCING 3 homolog, transcript variant X2	protein_coding	XP_010912661.1		340	281	217	213	923793301792132	612910691060076	598701452416616	631430474613382	0.1912	0.2794	6091	0.6962	nonDE
105038529	XM_010914365	LOC105038529	cleft lip and palate transmembrane protein 1 homolog	protein_coding	XP_010912667.1	.	761	740	707	619	206766677254062	161407085901942	195060795787349	183500217739758	-0.1478	0.2774	7539	0.6978	nonDE
105038542	XM_010914384	LOC105038542	far upstream element-binding protein 1	protein_coding	XP_010912686.1	.	438	533	471	371	11900631358381	116256725386128	129948564095957	109981552150969	-0.1176	0.2215	6891	0.7532	nonDE
105038545	XM_010914386	LOC105038545	uncharacterized LOC105038545	protein_coding	XP_010912688.1	.	98	102	235	157	266269834045967	222480037324298	648363324045644	465420584574183	-1.29	2395	5198	0.05205	nonDE
105038554	XM_010914399	LOC105038554	ras-related protein RABA2a	protein_coding	XP_010912701.1	.	215	181	230	207	584163411427377	394793007408803	634568359704247	613643700680611	-0.4901	0.9036	5778	0.3008	nonDE
105038558	gene-LOC105038558	LOC105038558	.	pseudogene	.	.	19	19	106	383	516237433354427	414423598937418	292453244037609	113538906937524	-3682	1843	4.05	0.09261	nonDE
105038560	XM_010914402	LOC105038560	12-oxophytodienoate reductase 1-like	protein_coding	XP_010912704.3	.	28	12	147	337	76077095441705	261741220381527	405571951637062	999023802557323	-3932	2485	4098	0.04775	downReg
105038571	XM_010914457	LOC105038571	protein FAR1-RELATED SEQUENCE 11	protein_coding	XP_010912759.1	.	188	282	324	159	510803355108591	615091867896589	893913689322504	47134950921844	-0.3075	0.4325	5918	0.5684	nonDE
105038580	XM_010914429,XM_019848246	LOC105038580	heparan-alpha-glucosaminide N-acetyltransferase, transcript variant X1	protein_coding	XP_010912731.1		179	215	99	72	486350003002328	468953019850236	273140293959654	213441287193256	0.8759	1625	5092	0.1191	nonDE
105038581	XM_010914430	LOC105038581	probable phosphoribosylformylglycinamidine synthase, chloroplastic/mitochondrial	protein_coding	XP_010912732.1	.	872	914	1057	662	236925811518453	199359562857263	291625546177126	19624740572491	-0.234	0.4348	7834	0.5664	nonDE
105038584	XM_010914432	LOC105038584	ankyrin repeat protein SKIP35	protein_coding	XP_010912734.1	.	118	132	87	64	320610616504328	28791534241968	240032379540302	189725588616228	0.3925	0.5335	4678	0.4962	nonDE
105038586	XM_010914433	LOC105038586	transducin beta-like protein 3	protein_coding	XP_010912735.1	.	176	214	205	149	478198885633574	466771843013723	565593537997264	441704885997155	-0.181	0.2989	5607	0.6793	nonDE
105038590	XM_010914440	LOC105038590	diacylglycerol kinase 2	protein_coding	XP_010912742.1	.	310	383	379	340	842282128104591	835390728384374	104565829707787	100791718952371	-0.3829	0.927	6538	0.2926	nonDE
105038593	XM_010914442	LOC105038593	la-related protein 6B	protein_coding	XP_010912744.1	.	482	715	452	419	130961285724649	15595414381066	124706477646226	124210971297186	0.113	0.2157	7061	0.7586	nonDE
105038596	XM_010914446	LOC105038596	uncharacterized LOC105038596	protein_coding	XP_010912748.1	.	137	160	93	95	372234359839771	348988293842036	256586336749978	281623920602213	0.3267	0.4909	4966	0.5241	nonDE
105038597	XM_010914447	LOC105038597	FRIGIDA-like protein 3	protein_coding	XP_010912749.1	.	3123	4566	5007	2390	848531318087302	995925343551711	138142772914746	708506494988725	-0.1946	0.2652	9898	0.71	nonDE
105038598	XM_019848635	LOC105038598	2-alkenal reductase (NADP(+)-dependent)	protein_coding	XP_019704194.1	.	162	68	91	144	440160337912722	148320024882865	251068351013419	426882574386512	-0.5343	0.443	4861	0.559	nonDE
105038601	XM_010914451,XM_010914452,XM_010914453,XM_029262596	LOC105038601	mitochondrial proton/calcium exchanger protein, transcript variant X3	protein_coding	XP_010912753.1		654	828	586	619	177694358638839	180601442063254	161676982081169	183500217739758	-0.03239	0.05569	7458	0.9371	nonDE
105038603	XM_010914455,XM_029262597	LOC105038603	probable V-type proton ATPase subunit H, transcript variant X1	protein_coding	XP_010912757.1		562	639	329	374	152697598707994	139377199853163	907708653663901	110870890847608	0.4481	1044	6.92	0.2501	nonDE
105038604	XM_010914459,XM_010914460,XM_029262598	LOC105038604	protein FAR1-RELATED SEQUENCE 6, transcript variant X2	protein_coding	XP_010912761.1		456	528	327	292	123896984005062	115166136967872	902190667927342	865622998061538	0.3402	0.7986	6685	0.3427	nonDE
105038605	XM_010914461	LOC105038605	eukaryotic translation initiation factor 2 subunit gamma	protein_coding	XP_010912763.1	.	201	216	162	115	546124863706525	471134196686749	446956844661252	340913167044784	0.267	0.4342	5.48	0.567	nonDE
105038607	XM_010914464	LOC105038607	60S ribosomal protein L5	protein_coding	XP_010912766.1	.	394	541	372	289	107051341442971	118001666855338	102634534699991	856729611095152	0.1707	0.3358	6684	0.6456	nonDE
105038611	XM_010914468	LOC105038611	small G protein signaling modulator 1	protein_coding	XP_010912770.1	.	276	371	171	232	749902797925378	809216606346221	471787780475766	687755258733825	0.37	0.6693	6061	0.4098	nonDE
105038617	XM_010914475,XM_010914477,XM_019848589,XR_002164040,XR_002164041	LOC105038617	putative RNA-binding protein Luc7-like 2, transcript variant X4	protein_coding	XP_010912777.1		502	652	513	376	136395363970485	14221272974063	14153633414273	111463783312034	0.05567	0.09442	7049	0.8948	nonDE
105038623	XM_019848742	LOC105038623	eukaryotic translation initiation factor 2A	protein_coding	XP_019704301.1	.	613	951	667	491	166554498234876	20742991715236	184024824314232	145555100016512	0.09457	0.1687	7447	0.8092	nonDE
105038626	XM_029262603,XM_029262604,XM_029262605,XM_029262606,XM_029262607	LOC105038626	eIF-2-alpha kinase GCN2, transcript variant X3	protein_coding	XP_029118436.1		598	709	576	500	162478939550498	154645437708752	15891798921289	148223116106428	-0.04673	0.08372	7286	0.906	nonDE
105038628	XM_010914492,XM_010914493	LOC105038628	transcription factor IIIB 60 kDa subunit, transcript variant X1	protein_coding	XP_010912794.1		398	389	274	233	108138157092138	84847778940345	755964045908538	690719721055953	0.3062	0.6021	6381	0.4524	nonDE
105038632	XM_010914497,XM_010914498	LOC105038632	probable E3 ubiquitin-protein ligase ARI8, transcript variant X1	protein_coding	XP_010912799.1		365	652	366	260	991719279865083	14221272974063	100979138979024	770760203753424	0.3449	0.6593	6679	0.4153	nonDE
105038633	XM_010914501	LOC105038633	inositol transporter 1	protein_coding	XP_010912803.1	.	847	1184	556	470	230133213711158	258251337443107	153400003476331	139329729140042	0.6464	1895	7562	0.08849	nonDE
105038634	XM_010914502,XR_830763	LOC105038634	ATP-dependent (S)-NAD(P)H-hydrate dehydratase, transcript variant X1	protein_coding	XP_010912804.1	.	149	179	80	129	404838829314787	390430653735778	220719429462347	382415639554584	0.3794	0.5039	5093	0.517	nonDE
105038638	XM_010914506,XR_003799826,XR_830769	LOC105038638	CMP-sialic acid transporter 5, transcript variant X1	protein_coding	XP_010912808.1	.	271	352	241	365	736317602310787	767774246452479	66491728125532	108202874757692	-0.2591	0.3926	6322	0.6011	nonDE
105038658	XM_010914533	LOC105038658	argininosuccinate synthase, chloroplastic	protein_coding	XP_010912835.1	.	403	421	533	658	109496676653597	918275448171858	147054319879289	195061620796059	-0.8486	1981	7027	0.07959	nonDE
105038664	XM_010914538,XM_029262611,XM_029262612,XM_029262614,XM_029262615,XM_029262616,XM_029262617,XM_029262618,XM_029262619	LOC105038664	cyclin-dependent kinase G-2, transcript variant X5	protein_coding	XP_010912840.1		2291	2250	3266	3671	622473663060522	490764788215363	901087070780031	108825411845339	-0.9301	2331	9531	0.05597	nonDE
105038674	XM_019847806	LOC105038674	heat shock 70 kDa protein 6, chloroplastic-like	protein_coding	XP_019703365.1	.	157	222	25	30	426575142298131	484221257705825	689748217069834	889338696638566	2437	3092	4253	0.02588	upReg
105038680	XM_010914557,XM_010914558	LOC105038680	glucose-6-phosphate 1-dehydrogenase, cytoplasmic isoform, transcript variant X2	protein_coding	XP_010912859.1		777	1712	561	916	211113939850731	373417474410979	154779499910471	271544748706976	0.3691	0.4883	7907	0.5253	nonDE
105038681	XM_010914559,XM_010914560	LOC105038681	AUGMIN subunit 6, transcript variant X1	protein_coding	XP_010912861.1		474	870	755	579	128787654426315	189762384776607	20830396155509	171642368451243	-0.3571	0.7512	7427	0.3654	nonDE
105038693	XM_019848435	LOC105038693	auxin response factor 7	protein_coding	XP_019703994.1	.	632	528	839	781	17171687256842	115166136967872	231479501648636	23152450735824	-0.821	1904	7496	0.08754	nonDE
105038721	XM_019847934	LOC105038721	protein transport protein Sec61 subunit alpha	protein_coding	XP_019703493.1	.	763	932	584	420	207310085078646	203285681162986	161125183507513	124507417529399	0.4408	1124	7415	0.2269	nonDE
105038724	XM_010914588	LOC105038724	cytochrome P450 71A9	protein_coding	XP_010912890.1	.	564	792	572	301	153241006532577	172749205451808	157814392065578	892303158960695	0.3592	0.6306	7.12	0.4335	nonDE
105038726	XM_010914589	LOC105038726	26S proteasome non-ATPase regulatory subunit 6	protein_coding	XP_010912891.1	.	541	685	467	439	146991816549866	149410613301122	128844966948645	130139895941444	0.104	0.2028	7115	0.772	nonDE
105038727	XM_010914590	LOC105038727	telomere length regulation protein TEL2 homolog	protein_coding	XP_010912892.1	.	260	334	218	146	706430171958689	72851306339525	601460445284895	432811499030769	0.392	0.784	5922	0.3495	nonDE
105038728	XM_010914591,XM_029262625	LOC105038728	anaphase-promoting complex subunit 2, transcript variant X1	protein_coding	XP_010912893.1		95	199	116	128	258118716677213	434054190466032	320043172720403	379451177232455	-0.09528	0.1031	5.1	0.8862	nonDE
105038730	XM_010914595,XM_029262626	LOC105038730	cystinosin homolog, transcript variant X2	protein_coding	XP_010912897.1		120	199	83	80	326044694750164	434054190466032	228996408067185	237156985770284	0.6193	0.9929	4895	0.2684	nonDE
105038734	XM_010914603	LOC105038734	very-long-chain 3-oxoacyl-CoA reductase 1	protein_coding	XP_010912905.2	.	67	247	120	122	182041621235508	538750678618643	33107914419352	361664403299684	-0.1264	0.09693	5047	0.8924	nonDE
105038739	XM_010914611	LOC105038739	protein RETICULATA-RELATED 1, chloroplastic	protein_coding	XP_010912913.1	.	270	309	286	155	733600563187869	673983642482432	78907196032789	459491659929926	0.1191	0.1571	6027	0.824	nonDE
105038742	XM_010914613,XM_019848653,XM_029262631,XM_029262632	LOC105038742	ultraviolet-B receptor UVR8, transcript variant X4	protein_coding	XP_010912915.1		236	406	273	395	641221233008656	885557795624167	753205053040258	117096261724078	-0.396	0.647	6397	0.4235	nonDE
105038743	XM_010914616	LOC105038743	pentatricopeptide repeat-containing protein At5g50280, chloroplastic	protein_coding	XP_010912918.2	.	134	185	101	43	364083242471017	403517714754854	278658279696213	127471879851528	0.9009	1228	4757	0.1983	nonDE
105038744	XM_010914619	LOC105038744	mitochondrial inner membrane protease atp23	protein_coding	XP_010912921.1	.	113	139	67	58	307025420889738	303183580275269	184852522174715	171938814683456	0.6723	1.01	4552	0.2627	nonDE
105038745	XM_010914620,XR_830781	LOC105038745	actin-related protein 3, transcript variant X1	protein_coding	XP_010912922.1	.	374	604	291	300	101617263197134	131743080925369	802866924669286	889338696638566	0.3702	0.8073	6.63	0.3389	nonDE
105038750	XM_010914626,XM_010914627	LOC105038750	alpha/beta hydrolase domain-containing protein 17B, transcript variant X1	protein_coding	XP_010912928.1		145	215	136	146	393970672823115	468953019850236	37522303008599	432811499030769	0.01745	0.02197	5384	0.9756	nonDE
105038752	XM_029262633,XM_029262634,XM_029262635	LOC105038752	regulator of nonsense transcripts UPF2, transcript variant X3	protein_coding	XP_029118466.1		299	208	290	183	812394697752492	453684781994647	800107931801007	542496604949526	-0.2365	0.2858	5986	0.6909	nonDE
105038754	XM_010914635,XM_010914636,XM_019848780,XM_019848781,XM_019848782,XM_029262640,XM_029262641	LOC105038754	protein-L-isoaspartate O-methyltransferase, transcript variant X3	protein_coding	XP_010912937.1		76	156	127	38	206494973341771	340263586495985	350392094271475	112649568240885	0.3207	0.2467	4.53	0.7277	nonDE
105038755	XM_010914637,XM_029262637,XM_029262638,XM_029262639,XR_003799831,XR_003799832,XR_003799833	LOC105038755	E3 ubiquitin-protein ligase RGLG1, transcript variant X2	protein_coding	XP_010912939.1		102	131	222	156	27713799053764	285734165583167	612496416758012	462456122252055	-1014	2067	5279	0.07326	nonDE
105038757	XM_010914638,XM_010914639,XM_019848490,XM_019848491,XM_019848492,XM_029262642,XM_029262643,XM_029262644,XM_029262645	LOC105038757	serine/threonine-protein kinase AFC1, transcript variant X5	protein_coding	XP_010912940.1		404	851	486	348	109768380565889	185618148787233	134087053398376	103163288810074	0.1991	0.2957	7019	0.6812	nonDE
105038759	XM_010914644,XM_010914645,XM_010914646,XM_019847915	LOC105038759	probable U3 small nucleolar RNA-associated protein 11, transcript variant X2	protein_coding	XP_010912946.1		164	184	129	154	445594416158558	401336537918342	355910080008034	456527197607797	-0.01975	0.02376	5372	0.9733	nonDE
105038764	XM_010914651	LOC105038764	cytochrome b5	protein_coding	XP_010912953.1	.	515	771	237	367	139927514830279	168168734095131	653881309782202	108795767222118	0.7807	1548	6832	0.1326	nonDE
105038766	XM_019848773	LOC105038766	probable serine/threonine-protein kinase WNK3	protein_coding	XP_019704332.1	.	187	349	143	128	508086315985672	761230715942941	394535980163945	379451177232455	0.604	1129	5.62	0.2254	nonDE
105038774	XM_010914667	LOC105038774	probable E3 ubiquitin-protein ligase XERICO	protein_coding	XP_010912969.1	.	240	235	85	111	652089389500328	512576556580491	234514393803743	32905531775627	0.9684	1682	5.33	0.1107	nonDE
105038775	XM_010914668,XM_010914669	LOC105038775	beta-1,4-mannosyl-glycoprotein 4-beta-N-acetylglucosaminyltransferase, transcript variant X1	protein_coding	XP_010912970.1		582	578	1024	802	15813167695383	126072021150436	282520869711804	23774987823471	-0.9742	2577	7581	0.04378	downReg
105038780	XM_010914674	LOC105038780	serine/threonine-protein kinase STY13	protein_coding	XP_010912976.1	.	205	221	195	209	556993020198197	482040080869312	53800360931447	619572625324868	-0.2513	0.448	5777	0.5558	nonDE
105038783	XM_010914684	LOC105038783	protein NBR1 homolog	protein_coding	XP_010912986.1	.	685	1147	992	600	186117179919885	25018098314801	27369209253331	177867739327713	-0.123	0.1908	7.77	0.785	nonDE
105038785	XM_010914686	LOC105038785	plant intracellular Ras-group-related LRR protein 3	protein_coding	XP_010912988.1	.	205	343	230	135	556993020198197	748143654923865	634568359704247	400202413487355	0.2619	0.3969	5837	0.5981	nonDE
105038789	XM_010914690,XM_010914691	LOC105038789	general negative regulator of transcription subunit 3, transcript variant X1	protein_coding	XP_010912992.1		939	1191	773	611	255129973642003	259778161228666	213270148717993	181128647882055	0.2974	0.7611	7814	0.3605	nonDE
105038792	XM_010914695	LOC105038792	photosynthetic NDH subunit of lumenal location 5, chloroplastic	protein_coding	XP_010912997.1	.	110	147	62	79	298874303520984	320632994967371	171057557833319	234192523448156	0.5515	0.7802	4646	0.3513	nonDE
105038797	XM_010914699	LOC105038797	probable metal-nicotianamine transporter YSL6	protein_coding	XP_010913001.1	.	186	262	69	71	505369276862754	571468331166334	190370507911274	210476824871127	1337	2426	5042	0.05039	nonDE
105038802	XM_010914705	LOC105038802	acetolactate synthase 1, chloroplastic	protein_coding	XP_010913007.1	.	205	117	129	110	556993020198197	255197689871989	355910080008034	326090855434141	-0.01289	0.01028	5169	0.9879	nonDE
105038803	XM_019847964	LOC105038803	U6 snRNA-associated Sm-like protein LSm6	protein_coding	XP_019703523.1	.	209	315	126	91	567861176689869	687070703501509	347633101403196	269766071313698	0.9298	1892	5456	0.08856	nonDE
105038805	XM_010914709	LOC105038805	uncharacterized LOC105038805	protein_coding	XP_010913011.1	.	602	895	864	636	163565755199666	195215326867889	238376983819335	188539803687376	-0.3356	0.8121	7606	0.337	nonDE
105038807	XM_010914710	LOC105038807	protein NUCLEAR FUSION DEFECTIVE 4	protein_coding	XP_010913012.2	.	181	261	337	158	491784081248164	569287154329821	929780596610136	468385046896312	-0.416	0.6026	5888	0.4521	nonDE
105038811	XM_010914717	LOC105038811	gamma carbonic anhydrase-like 2, mitochondrial	protein_coding	XP_010913019.3	.	89	138	114	75	241816481939705	301002403438756	314525186983844	222334674159642	-0.05853	0.06051	4747	0.9323	nonDE
105038819	XM_010914725	LOC105038819	sphingosine-1-phosphate lyase	protein_coding	XP_010913027.1	.	374	617	314	459	101617263197134	134578610812835	866323760639711	136068820585701	0.02976	0.03583	6818	0.9587	nonDE
105038824	XM_010914730	LOC105038824	putative multidrug resistance protein	protein_coding	XP_010913032.1	.	161	450	81	105	437443298789804	981529576430727	223478422330626	311268543823498	1256	1526	5383	0.1356	nonDE
105038835	XM_010914744,XM_010914745	LOC105038835	O-fucosyltransferase 1, transcript variant X1	protein_coding	XP_010913046.1		136	216	64	72	369517320716853	471134196686749	176575543569877	213441287193256	1.03	1701	4838	0.1086	nonDE
105038836	XM_010914746,XM_010914747,XM_010914748	LOC105038836	TBC1 domain family member 13, transcript variant X3	protein_coding	XP_010913048.1		163	276	75	83	44287737703564	602004806877512	20692446512095	24605037273667	1.12	1942	5099	0.08338	nonDE
105038842	XM_010914754	LOC105038842	ER lumen protein-retaining receptor	protein_coding	XP_010913056.1	.	170	211	119	127	461896650896066	460228312504185	328320151325241	376486714910326	0.304	0.5178	5336	0.5071	nonDE
105038843	XM_010914756,XM_010914757	LOC105038843	eukaryotic translation initiation factor 3 subunit H, transcript variant X2	protein_coding	XP_010913058.1		442	688	442	527	120093129232977	150064966352076	121947484777947	156227164376175	-0.1217	0.2037	7.09	0.7707	nonDE
105038855	XM_010914766,XM_019847975,XR_003799848,XR_003799849,XR_003799850	LOC105038855	FHA domain-containing protein FHA2, transcript variant X3	protein_coding	XP_010913068.1		80	171	201	85	217363129833443	372981239043676	554557566524146	251979297380927	-0.465	0.4931	5034	0.5234	nonDE
105038864	XM_010914782,XM_029262665	LOC105038864	galacturonosyltransferase 8, transcript variant X2	protein_coding	XP_010913084.1		364	245	267	304	989002240742165	534388324945618	736651095830582	901196545927081	-0.2681	0.3419	6269	0.6402	nonDE
105038866	XM_010914784	LOC105038866	ras GTPase-activating protein-binding protein 1	protein_coding	XP_010913086.1	.	872	983	795	534	236925811518453	214409683029201	219339933028207	158302288001665	0.1792	0.3452	7.68	0.6382	nonDE
105038874	XM_010914791	LOC105038874	serine hydroxymethyltransferase 4	protein_coding	XP_010913093.1	.	813	812	712	1137	220895280693236	177111559124833	196440292221489	337059366026017	-0.4717	0.7949	7818	0.3445	nonDE
105038875	XM_010914793	LOC105038875	adenosylhomocysteinase	protein_coding	XP_010913095.1	.	3702	4249	3395	4628	100584788330426	926782037834257	936678078780834	13719531626811	-0.3224	0.6102	10.03	0.4463	nonDE
105038885	XM_010914805,XR_830802,XR_830803	LOC105038885	probable UDP-N-acetylglucosamine--peptide N-acetylglucosaminyltransferase SEC, transcript variant X2	protein_coding	XP_010913107.1	.	357	520	383	289	969982966881738	113421195498662	105669426855099	856729611095152	0.0516	0.08309	6644	0.9069	nonDE
105038912	XM_010914831,XM_010914832,XM_029262709	LOC105038912	uncharacterized LOC105038912, transcript variant X1	protein_coding	XP_010913133.1		132	243	64	192	358649164225181	530025971272592	176575543569877	569176765848683	0.4399	0.3832	5222	0.6075	nonDE
105038919	XM_010914839	LOC105038919	zinc finger A20 and AN1 domain-containing stress-associated protein 8	protein_coding	XP_010913141.1	.	245	247	235	246	665674585114919	538750678618643	648363324045644	729257731243625	-0.2962	0.5544	6007	0.4812	nonDE
105038925	XM_010914851,XM_010914852,XM_010914853,XM_010914855,XM_029262708,XR_003799869,XR_003799870,XR_830809,XR_830810,XR_830811	LOC105038925	E3 ubiquitin-protein ligase makorin, transcript variant X3	protein_coding	XP_010913153.1		230	402	386	209	624918998271148	876833088278116	106497124715582	619572625324868	-0.2227	0.3105	6279	0.6689	nonDE
105038927	XM_019848423,XM_029262706,XM_029262707	LOC105038927	carboxyl-terminal-processing peptidase 3, chloroplastic, transcript variant X2	protein_coding	XP_019703982.1		207	356	324	230	562427098444033	77649895379853	893913689322504	681826334089568	-0.3254	0.6061	6169	0.4492	nonDE
105038931	XM_010914865	LOC105038931	protein FAR1-RELATED SEQUENCE 6	protein_coding	XP_010913167.1	.	283	430	308	314	768922071785804	937906039700472	849769803430035	930841169148366	-0.1518	0.275	6444	0.7001	nonDE
105038936	XM_010914867,XM_029262704	LOC105038936	ADP,ATP carrier protein 1, mitochondrial, transcript variant X1	protein_coding	XP_010913169.1		228	86	297	449	619484920025312	187581207940094	819420881878962	133104358263572	-1809	2044	5903	0.07491	nonDE
105038938	XM_010914869,XM_019848696	LOC105038938	threonine--tRNA ligase, chloroplastic/mitochondrial 2, transcript variant X2	protein_coding	XP_010913171.1		103	198	162	156	279855029660558	43187301362952	446956844661252	462456122252055	-0.439	0.7406	5318	0.3696	nonDE
105038940	XM_010914872,XM_029262701	LOC105038940	pirin-like protein, transcript variant X2	protein_coding	XP_010913174.2		88	29	140	123	239099442816787	63254128258869	386259001559107	364628865621812	-1812	1903	4436	0.08754	nonDE
105038942	XM_010914874	LOC105038942	E3 ubiquitin-protein ligase UPL5	protein_coding	XP_010913176.2	.	169	156	126	128	459179611773148	340263586495985	347633101403196	379451177232455	0.01117	0.01242	5249	0.986	nonDE
105038950	XM_010914887,XR_002163790,XR_830814,XR_830815	LOC105038950	U4/U6.U5 tri-snRNP-associated protein 2, transcript variant X2	protein_coding	XP_010913189.1	.	569	912	453	418	154599526094036	198923327489961	124982376933054	123914525064974	0.4095	1006	7208	0.2641	nonDE
105038953	XM_010914890,XM_010914891	LOC105038953	fimbrin-4, transcript variant X2	protein_coding	XP_010913192.1		403	577	516	391	109496676653597	125853903466784	142364032003214	115910476795227	-0.2197	0.4606	6942	0.5459	nonDE
105038957	XM_019848625	LOC105038957	serine/threonine-protein phosphatase 7 long form homolog	protein_coding	XP_019704184.1	.	114	54	190	134	309742460012656	117783549171687	524208644973074	397237951165226	-1447	1847	4891	0.09205	nonDE
105038960	XM_010914903,XM_010914904	LOC105038960	uncharacterized LOC105038960, transcript variant X2	protein_coding	XP_010913205.1		261	465	432	326	709147211081607	101424722897842	119188491909667	966414717013909	-0.4237	0.8776	6578	0.309	nonDE
105038961	XM_010914906	LOC105038961	uncharacterized LOC105038961	protein_coding	XP_010913208.1	.	110	128	64	82	298874303520984	279190635073629	176575543569877	243085910414542	0.3892	0.4966	4621	0.5213	nonDE
105038962	XM_010914907	LOC105038962	putative BPI/LBP family protein At1g04970	protein_coding	XP_010913209.1	.	134	190	125	118	364083242471017	414423598937418	344874108534917	349806554011169	0.07868	0.105	5204	0.8843	nonDE
105038964	XM_010914913	LOC105038964	uncharacterized protein At1g03900	protein_coding	XP_010913215.1	.	144	184	115	80	391253633700197	401336537918342	317284179852123	237156985770284	0.4251	0.6879	5049	0.399	nonDE
105038968	XM_010914916	LOC105038968	65-kDa microtubule-associated protein 1	protein_coding	XP_010913218.1	.	323	737	96	174	877603636702525	160752732850988	264863315354816	515816444050369	1637	2.33	6054	0.05597	nonDE
105038974	XM_010914921	LOC105038974	heat shock protein 81-1	protein_coding	XP_010913223.1	.	1250	1261	1293	1479	339629890364754	275046399084255	356737777868518	438443977442813	-0.4617	1087	8442	0.2363	nonDE
105038975	XM_010914922	LOC105038975	heat shock protein 81-1-like	protein_coding	XP_010913224.1	.	1108	872	1097	1350	301047934819318	19019862014391	302661517650243	400202413487355	-0.6334	1209	8174	0.2017	nonDE
105038981	XM_010914934	LOC105038981	ketol-acid reductoisomerase, chloroplastic	protein_coding	XP_010913236.1	.	7149	7460	10716	6468	19424112689741	162715792003849	295653675764813	191741422995275	-0.5084	1048	11.01	0.2488	nonDE
105038985	XM_010914938	LOC105038985	probable protein phosphatase 2C 66	protein_coding	XP_010913240.1	.	331	691	455	342	899339949685869	150719319403029	12553417550671	101384611416797	-0.03309	0.04135	6842	0.9526	nonDE
105038988	XM_010914941	LOC105038988	peroxisome biogenesis protein 5	protein_coding	XP_010913243.1	.	1461	2632	1174	900	396959415858325	574085743370149	323905762735994	26680160899157	0.6067	1501	8.55	0.1395	nonDE
105038989	XM_010914945	LOC105038989	SCY1-like protein 2	protein_coding	XP_010913247.1	.	329	325	425	340	893905871440033	708882471866636	117257196901872	100791718952371	-0.5476	1261	6542	0.19	nonDE
105038993	XM_010914947,XM_010914948,XM_010914949,XM_010914950,XM_029262689	LOC105038993	probable WRKY transcription factor 2, transcript variant X1	protein_coding	XP_010913249.1		417	538	595	636	113300531425682	117347313804385	16416007566262	188539803687376	-0.6975	1913	7155	0.08686	nonDE
105038994	XM_010914951,XM_029262688,XR_830824,XR_830825	LOC105038994	chloride channel protein CLC-f, transcript variant X1	protein_coding	XP_010913253.1		358	334	305	289	972700006004656	72851306339525	841492824825197	856729611095152	-0.1109	0.172	6404	0.8049	nonDE
105038998	XM_010914955,XM_010914957	LOC105038998	uncharacterized LOC105038998, transcript variant X1	protein_coding	XP_010913257.1		179	226	337	291	486350003002328	492945965051876	929780596610136	862658535739409	-0.962	2474	6052	0.0484	downReg
105039005	XM_010914967,XM_019848654,XM_019848655	LOC105039005	ubiquitin-conjugating enzyme E2-17 kDa, transcript variant X3	protein_coding	XP_010913269.1		605	590	657	448	164380866936541	128689433354251	181265831445952	132807912031359	-0.1949	0.3416	7232	0.6404	nonDE
105039006	XM_010914968	LOC105039006	uncharacterized WD repeat-containing protein C2A9.03	protein_coding	XP_010913270.1	.	1042	1809	1105	835	283115476608059	394574889725152	304868711944867	247532603897734	0.1912	0.374	8244	0.6153	nonDE
105039009	XM_010914971,XM_029262683	LOC105039009	ubiquitin-conjugating enzyme E2-17 kDa, transcript variant X1	protein_coding	XP_010913273.1		558	631	330	292	151610783058826	137632258383953	91046764653218	865622998061538	0.607	1612	6825	0.1211	nonDE
105039012	XM_010914977,XR_002164005,XR_002164006	LOC105039012	proteasome activator subunit 4, transcript variant X3	protein_coding	XP_010913279.1	.	411	498	618	455	111670307951931	108622606458334	170505759259663	134883035656849	-0.556	1441	7015	0.1494	nonDE
105039014	XM_010914982,XM_010914984,XM_010914986,XM_010914988,XM_029262679,XM_029262680	LOC105039014	KH domain-containing protein At5g56140, transcript variant X3	protein_coding	XP_010913284.1		156	206	80	74	423858103175213	449322428321622	220719429462347	219370211837513	0.8947	1639	4.96	0.1167	nonDE
105039015	NM_001303591	IAA1	auxin-responsive protein IAA1	protein_coding	NP_001290520.1	.	176	323	187	243	478198885633574	70452011819361	515931666368236	720364344277239	-0.1406	0.1869	5898	0.7899	nonDE
105039037	XM_029262684	LOC105039037	phosphatidylinositol/phosphatidylcholine transfer protein SFH13	protein_coding	XP_029118517.1	.	100	167	40	150	271703912291803	364256531697625	110359714731173	444669348319283	0.4949	0.3779	4731	0.6121	nonDE
105039046	XM_010915019	LOC105039046	CCR4-NOT transcription complex subunit 10	protein_coding	XP_010913321.1	.	166	268	148	112	451028494404394	58455539218541	408330944505342	332019780078398	0.3905	0.6923	5447	0.3965	nonDE
105039049	XM_010915026,XM_019847068,XM_019847077	LOC105039049	PX domain-containing protein EREL1, transcript variant X2	protein_coding	XP_010913328.1		111	196	71	46	301591342643902	427510659956494	195888493647833	136365266817914	1051	1508	4607	0.1383	nonDE
105039050	XM_010915027	LOC105039050	uncharacterized LOC105039050	protein_coding	XP_010913329.1	.	121	164	105	83	328761733873082	357713001188087	28969425116933	24605037273667	0.2668	0.3832	4926	0.6075	nonDE
105039053	XM_010915029,XM_010915030,XM_019848459	LOC105039053	probable sucrose-phosphate synthase 1, transcript variant X2	protein_coding	XP_010913331.1		833	1110	485	428	226329358939072	242110628852913	133811154111548	126878987387102	0.7542	2235	7449	0.06123	nonDE
105039055	XM_010915033,XR_003799871	LOC105039055	synaptotagmin-5, transcript variant X1	protein_coding	XP_010913335.1	.	115	128	86	56	312459499135574	279190635073629	237273386672023	166009890039199	0.4502	0.5933	4606	0.4581	nonDE
105039056	XM_010915034,XM_010915035,XM_019848402,XM_029262716	LOC105039056	phosphoenolpyruvate phosphatase, transcript variant X4	protein_coding	XP_010913336.1		257	480	219	170	698279054589935	104696488152611	604219438153174	503958594761854	0.5462	1088	6105	0.2363	nonDE
105039059	XM_010915038	LOC105039059	ER membrane protein complex subunit 7 homolog	protein_coding	XP_010913340.1	.	105	171	74	81	285289107906394	372981239043676	204165472252671	240121448092413	0.4948	0.7127	4756	0.3842	nonDE
105039060	XM_010915042	LOC105039060	uncharacterized LOC105039060	protein_coding	XP_010913344.1	.	843	1216	905	857	22904639806199	265231103319947	24968885457928	254054421006417	-0.1208	0.2559	7962	0.7183	nonDE
105039062	XM_010915041	LOC105039062	pyrophosphate-energized vacuolar membrane proton pump	protein_coding	XP_010913343.1	.	2109	2194	2254	4239	573023551023413	478550197930892	621876992510162	125663557835029	-0.847	1396	9.41	0.1593	nonDE
105039064	XM_010915046,XM_010915047,XM_029262718	LOC105039064	probable anion transporter 6, chloroplastic, transcript variant X3	protein_coding	XP_010913348.1		153	207	159	149	415706985806459	451503605158134	438679866056414	441704885997155	-0.1097	0.1677	5453	0.8103	nonDE
105039067	XM_010915054,XM_010915063	LOC105039067	CTP synthase, transcript variant X2	protein_coding	XP_010913356.1		219	336	273	262	59503156791905	732875417068276	753205053040258	776689128397681	-0.2966	0.6152	6154	0.4434	nonDE
105039068	XM_010915052	LOC105039068	protein S-acyltransferase 24	protein_coding	XP_010913354.1	.	241	273	170	170	654806428623246	595461276367974	469028787607487	503958594761854	0.2681	0.5037	5787	0.517	nonDE
105039069	XM_010915053,XM_029262719	LOC105039069	protein PHOX1, transcript variant X2	protein_coding	XP_010913355.1		1435	1453	2605	2388	389895114138738	316924994345299	718717642186767	707913602524299	-1.11	3034	8968	0.02695	downReg
105039073	XM_010915062	LOC105039073	threonine--tRNA ligase, mitochondrial 1	protein_coding	XP_010913364.1	.	1061	1142	839	874	288277850941603	249090394729753	231479501648636	259094006954036	0.04054	0.06923	8002	0.9227	nonDE
105039074	XM_010915064	LOC105039074	ubiquitin-like domain-containing protein CIP73	protein_coding	XP_010913366.1	.	226	354	284	217	614050841779476	772136600125505	783553974591331	643288323901896	-0.1322	0.2213	6.13	0.7532	nonDE
105039075	XM_010915065,XM_019848582,XM_019848583	LOC105039075	uncharacterized LOC105039075, transcript variant X1	protein_coding	XP_010913367.1		464	746	500	466	126070615303397	162715792003849	137949643413967	138143944211191	-0.03089	0.04994	7137	0.9438	nonDE
105039077	XM_010915067	LOC105039077	uncharacterized LOC105039077	protein_coding	XP_010913369.1	.	219	209	222	185	59503156791905	45586595883116	612496416758012	548425529593783	-0.2604	0.4506	5783	0.5538	nonDE
105039079	XM_010915069,XM_010915070,XM_010915071,XM_019848564	LOC105039079	homeobox protein knotted-1-like 11, transcript variant X3	protein_coding	XP_010913371.1		281	148	148	84	763487993539968	322814171803883	408330944505342	249014835058799	0.4811	0.4463	5319	0.5566	nonDE
105039082	XM_010915078,XM_010915079,XR_830831,XR_830832	LOC105039082	aberrant root formation protein 4, transcript variant X1	protein_coding	XP_010913380.1		156	216	115	77	423858103175213	471134196686749	317284179852123	228263598803899	0.6287	1111	5122	0.2294	nonDE
105039085	XM_010915084	LOC105039085	transmembrane 9 superfamily member 11	protein_coding	XP_010913386.1	.	116	54	179	162	315176538258492	117783549171687	493859723422001	480242896184826	-1522	2008	4944	0.07727	nonDE
105039086	XM_010915087,XM_010915101,XR_002163468,XR_002163469,XR_830842	LOC105039086	zinc finger CCCH domain-containing protein 8, transcript variant X2	protein_coding	XP_010913389.1		310	342	463	319	842282128104591	745962478087352	127741369801333	945663480759009	-0.5687	1306	6546	0.1792	nonDE
105039090	XM_010915088,XM_010915089,XM_010915090,XM_019848476,XR_003799878	LOC105039090	uncharacterized LOC105039090, transcript variant X1	protein_coding	XP_010913390.1		362	449	413	357	983568162496329	979348399594214	113946405459937	105831304899989	-0.2542	0.5666	6.7	0.4735	nonDE
105039095	XM_010915096	LOC105039095	protein disulfide isomerase-like 2-3	protein_coding	XP_010913398.1	.	648	847	238	360	176064135165089	184745678052628	656640302650482	106720643596628	1021	2184	6943	0.06487	nonDE
105039096	XM_010915131,XM_010915210	LOC105039096	serine/threonine protein phosphatase 2A 57 kDa regulatory subunit B' kappa isoform, transcript variant X1	protein_coding	XP_010913433.1		196	211	208	231	532539668091935	460228312504185	573870516602102	684790796411696	-0.4356	0.8775	5803	0.309	nonDE
105039099	XM_010915098	LOC105039099	E3 ubiquitin-protein ligase COP1	protein_coding	XP_010913400.1	.	414	558	316	230	112485419688807	12170966747741	87184174637627	681826334089568	0.509	1243	6572	0.1938	nonDE
105039101	XM_010915099	LOC105039101	EH domain-containing protein 1	protein_coding	XP_010913401.1	.	863	921	1071	1406	234480476307826	200886386642822	295488136192717	416803402491275	-0.7861	1853	8109	0.09201	nonDE
105039105	XM_010915104,XM_029262722,XR_830835	LOC105039105	putative transcription elongation factor SPT5 homolog 1, transcript variant X3	protein_coding	XP_010913406.1		362	610	332	248	983568162496329	133051787027276	915985632268739	735186655887882	0.394	0.8318	6.6	0.3288	nonDE
105039111	XM_010915114	LOC105039111	pyrophosphate--fructose 6-phosphate 1-phosphotransferase subunit beta	protein_coding	XP_010913416.1	.	1571	2172	958	1462	426846846210423	473751608890564	26431151678116	433404391495195	0.3187	0.5491	8608	0.4846	nonDE
105039113	XM_010915117,XM_029262725,XR_003799879,XR_830840,XR_830841	LOC105039113	DExH-box ATP-dependent RNA helicase DExH15 chloroplastic, transcript variant X5	protein_coding	XP_010913419.1		324	408	292	134	880320675825443	889920149297192	805625917537566	397237951165226	0.538	0.8614	6148	0.3164	nonDE
105039120	XM_010915126,XM_019847364,XM_019847365,XM_029262726	LOC105039120	alanine--tRNA ligase, chloroplastic/mitochondrial, transcript variant X3	protein_coding	XP_010913428.1		263	347	332	234	714581289327443	756868362269916	915985632268739	693684183378082	-0.2089	0.39	6261	0.6027	nonDE
105039121	XM_010915132	LOC105039121	actin-related protein 2/3 complex subunit 2A	protein_coding	XP_010913434.1	.	226	323	105	129	614050841779476	70452011819361	28969425116933	382415639554584	0.9055	1848	5553	0.09205	nonDE
105039122	XM_010915130	LOC105039122	uncharacterized LOC105039122	protein_coding	XP_010913432.1	.	834	1078	602	642	226601062851364	235130862976072	166091370670416	190318481080653	0.2881	0.7	7663	0.392	nonDE
105039123	XM_010915134	LOC105039123	betaine aldehyde dehydrogenase 2	protein_coding	XP_010913436.1	.	2548	2876	2357	2274	692301568519515	62730645818106	650294619053439	674118732052033	-0.09603	0.1877	9368	0.7892	nonDE
105039124	XM_010915135	LOC105039124	alpha-mannosidase 2	protein_coding	XP_010913437.1	.	217	297	249	193	589597489673214	647809520444279	686989224201554	572141228170811	-0.1125	0.1884	5963	0.7883	nonDE
105039126	XM_010915138,XM_010915139,XR_002163986	LOC105039126	chromatin remodeling protein EBS, transcript variant X1	protein_coding	XP_010913440.1		225	403	151	137	611333802656558	879014265114628	416607923110179	406131338131612	0.7492	1547	5783	0.1327	nonDE
105039135	XM_010915155	LOC105039135	isocitrate dehydrogenase [NADP]	protein_coding	XP_010913457.1	.	1203	1434	691	658	32685980648704	312780758355925	190646407198102	195061620796059	0.6398	1902	7957	0.08754	nonDE
105039137	XM_010915154,XM_029262732	LOC105039137	uncharacterized LOC105039137, transcript variant X1	protein_coding	XP_010913456.1		159	124	147	145	432009220543967	270465927727578	405571951637062	42984703670864	-0.4217	0.6253	5245	0.4372	nonDE
105039141	XM_010915159	LOC105039141	metalloendoproteinase 2-MMP-like	protein_coding	XP_010913461.1	.	122	64	300	172	331478772996	139595317536814	8276978604838	509887519406111	-1777	2319	5.23	0.05648	nonDE
105039146	XM_010915166,XM_010915167,XM_010915168,XR_003799880,XR_830847,XR_830848	LOC105039146	ferredoxin-thioredoxin reductase catalytic chain, chloroplastic, transcript variant X5	protein_coding	XP_010913468.1		127	213	45	35	34506396861059	464590666177211	12415467907257	103756181274499	1728	2385	4425	0.05221	nonDE
105039149	XM_010915174	LOC105039149	U-box domain-containing protein 41	protein_coding	XP_010913476.1	.	84	93	122	96	228231286325115	202849445795684	336597129930079	284588382924341	-0.6348	1011	4697	0.2626	nonDE
105039153	XM_010915180,XM_010915181	LOC105039153	chaperone protein dnaJ 16, transcript variant X1	protein_coding	XP_010913482.1		155	279	148	155	421141064052295	60854833738705	408330944505342	459491659929926	0.1551	0.2206	5553	0.754	nonDE
105039155	XM_010915184,XM_010915187,XM_010915188	LOC105039155	alpha-mannosidase I MNS5, transcript variant X2	protein_coding	XP_010913486.1		217	291	185	180	589597489673214	634722459425203	510413680631677	53360321798314	0.1411	0.2426	5824	0.732	nonDE
105039156	XM_010915198	LOC105039156	uncharacterized LOC105039156	protein_coding	XP_010913500.1	.	192	194	192	133	521671511600263	423148306283469	529726630709632	394273488843098	-0.07292	0.09547	5538	0.8939	nonDE
105039157	XM_010915189	LOC105039157	GPI ethanolamine phosphate transferase 1	protein_coding	XP_010913491.1	.	150	183	200	134	407555868437705	399155361081829	551798573655867	397237951165226	-0.3189	0.549	5446	0.4846	nonDE
105039164	XM_010915200,XM_010915201,XM_010915203,XM_019847863,XM_029262735,XR_830854,XR_830855	LOC105039164	DNA polymerase lambda, transcript variant X6	protein_coding	XP_010913502.1		121	93	159	121	328761733873082	202849445795684	438679866056414	358699940977555	-0.7669	1214	5006	0.2004	nonDE
105039166	XM_010915205,XM_010915206	LOC105039166	cyclin-D2-1, transcript variant X1	protein_coding	XP_010913507.1		85	136	57	95	230948325448033	296640049765731	157262593491922	281623920602213	0.2677	0.2708	4561	0.7042	nonDE
105039167	XM_010915219	LOC105039167	probable plastid-lipid-associated protein 14, chloroplastic	protein_coding	XP_010913521.1	.	108	222	233	125	293440225275148	484221257705825	642845338309085	370557790266069	-0.4402	0.5948	5427	0.4579	nonDE
105039169	XM_010915208	LOC105039169	nucleobase-ascorbate transporter 6	protein_coding	XP_010913510.1	.	75	223	20	147	203777934218853	486402434542338	551798573655867	435775961352898	1083	0.6311	4479	0.4331	nonDE
105039170	XM_010915209,XR_830856	LOC105039170	protein LSM12 homolog, transcript variant X2	protein_coding	XP_010913511.1	.	260	355	196	162	706430171958689	774317776962018	54076260218275	480242896184826	0.4446	1006	5943	0.2641	nonDE
105039171	XM_010915213,XM_029262738,XR_003799881,XR_003799882,XR_003799883,XR_830858	LOC105039171	uncharacterized LOC105039171, transcript variant X2	protein_coding	XP_010913515.1		845	881	1440	1313	229589805886574	192161679296771	397294973032224	389233902895479	-0.9979	2828	8168	0.03319	downReg
105039179	XM_010915237,XM_029262741	LOC105039179	protease Do-like 9, transcript variant X2	protein_coding	XP_010913539.1		294	350	282	269	798809502137902	763411892779454	778035988854772	797440364652581	-0.1044	0.1829	6296	0.7936	nonDE
105039184	XM_010915242,XM_019847106	LOC105039184	kinesin-like protein KIN-4C, transcript variant X1	protein_coding	XP_010913544.1		134	228	139	134	364083242471017	497308318724901	383500008690827	397237951165226	0.05356	0.06795	5354	0.9241	nonDE
105039187	XM_010915254,XM_019851822	LOC105039187	glutamate synthase 1 [NADH], chloroplastic, transcript variant X2	protein_coding	XP_010913556.1		9766	8872	7827	14817	265346040744175	193514008935409	215946371800224	439244382269788	-0.5327	0.7262	11.37	0.3772	nonDE
105039189	XM_019847933	LOC105039189	probable RNA-dependent RNA polymerase 2	protein_coding	XP_019703492.1	.	105	244	116	103	285289107906394	532207148109105	320043172720403	305339619179241	0.2692	0.3135	5131	0.6655	nonDE
105039191	XM_010915257	LOC105039191	AP-1 complex subunit gamma-2	protein_coding	XP_010913559.1	.	939	1303	1003	1002	255129973642003	284207341797608	276726984688417	297039124677281	-0.1806	0.4151	8119	0.5819	nonDE
105039195	XM_010915267,XM_010915269,XM_029262755,XM_029262757	LOC105039195	probable alpha,alpha-trehalose-phosphate synthase [UDP-forming] 9, transcript variant X1	protein_coding	XP_010913569.1		464	560	859	1164	126070615303397	122145902844713	236997487385195	345063414295764	-1296	2.97	7559	0.02903	downReg
105039197	XM_010915272,XM_029262758,XM_029262759	LOC105039197	U4/U6 small nuclear ribonucleoprotein Prp31 homolog, transcript variant X1	protein_coding	XP_010913574.1		620	721	545	408	168456425620918	157262849912568	150365111321224	120950062742845	0.1754	0.3554	7212	0.6303	nonDE
105039198	XM_010915274	LOC105039198	aldehyde dehydrogenase family 2 member B7, mitochondrial	protein_coding	XP_010913576.1	.	1544	2148	1879	1394	419510840578545	468516784482933	518414759949687	413246047704721	-0.1525	0.321	8824	0.6596	nonDE
105039199	XM_010915278	LOC105039199	replication stress response regulator SDE2	protein_coding	XP_010913580.1	.	237	266	287	186	643938272131574	580193038512385	791830953196169	551389991915911	-0.2138	0.3561	5993	0.6301	nonDE
105039204	XM_010915280	LOC105039204	homeobox-leucine zipper protein HOX16	protein_coding	XP_010913582.1	.	222	467	329	188	603182685287804	101860958265144	907708653663901	557318916560168	0.05418	0.05899	6225	0.9336	nonDE
105039205	XM_010915281	LOC105039205	DEAD-box ATP-dependent RNA helicase 29	protein_coding	XP_010913583.1	.	1021	992	1107	728	277409694449931	216372742182062	305420510518522	215812857050959	-0.1605	0.2739	7971	0.7007	nonDE
105039206	XM_010915282	LOC105039206	RNA-binding protein 25	protein_coding	XP_010913584.1	.	274	293	216	234	744468719679542	639084813098229	595942459548336	693684183378082	0.009092	0.01239	6.06	0.986	nonDE
105039209	XM_010915285,XM_029262762	LOC105039209	probable acyl-activating enzyme 17, peroxisomal, transcript variant X1	protein_coding	XP_010913587.1		169	204	188	159	459179611773148	444960074648596	518690659236515	47134950921844	-0.2257	0.4054	5567	0.5903	nonDE
105039211	XM_010915288,XM_010915289	LOC105039211	protein CHAPERONE-LIKE PROTEIN OF POR1, chloroplastic, transcript variant X1	protein_coding	XP_010913590.1		200	243	160	143	543407824583607	530025971272592	441438858924694	423918112064383	0.2164	0.3836	5594	0.6074	nonDE
105039218	XM_010915294,XM_019848693	LOC105039218	importin-9, transcript variant X2	protein_coding	XP_010913596.1		508	662	550	385	138025587444236	144393906577142	151744607755363	114131799401949	0.007501	0.01146	7092	0.9867	nonDE
105039219	XM_010915295	LOC105039219	enolase 1, chloroplastic	protein_coding	XP_010913597.1	.	445	182	126	120	120908240969853	396974184245316	347633101403196	355735478655427	0.858	0.7867	5.63	0.3485	nonDE
105039221	XM_010915301,XM_019853776	LOC105039221	long chain acyl-CoA synthetase 4, transcript variant X2	protein_coding	XP_010913603.1		302	415	190	222	820545815121246	905188387152781	524208644973074	658110635512539	0.4685	1018	6156	0.2599	nonDE
105039230	XM_010915310	LOC105039230	probable cyclic nucleotide-gated ion channel 14	protein_coding	XP_010913612.1	.	56	97	218	101	15215419088341	211574153141734	601460445284895	299410694534984	-1325	1721	4794	0.1058	nonDE
105039232	XM_010915311,XM_019847661	LOC105039232	probable xyloglucan glycosyltransferase 5, transcript variant X1	protein_coding	XP_010913613.1		56	199	85	330	15215419088341	434054190466032	234514393803743	978272566302423	-0.8424	0.533	5.14	0.4964	nonDE
105039238	XM_010915316	LOC105039238	histidine kinase 5	protein_coding	XP_010913618.1	.	83	171	143	141	225514247202197	372981239043676	394535980163945	417989187420126	-0.5251	0.829	5107	0.3301	nonDE
105039239	XM_010915317,XR_830869	LOC105039239	RNA-binding protein with multiple splicing 2, transcript variant X1	protein_coding	XP_010913619.1	.	312	392	311	193	847716206350427	855021319912989	858046782034873	572141228170811	0.1832	0.3025	6274	0.676	nonDE
105039242	XM_010915323,XM_010915332	LOC105039242	spermine synthase, transcript variant X1	protein_coding	XP_010913625.1		328	349	385	460	891188832317115	761230715942941	106221225428754	136365266817914	-0.638	1445	6639	0.149	nonDE
105039247	XM_010915326,XM_029262764,XM_029262765	LOC105039247	ADP-ribosylation factor 1, transcript variant X1	protein_coding	XP_010913628.1		257	279	294	263	698279054589935	60854833738705	811143903274124	77965359071981	-0.3821	0.8452	6173	0.3233	nonDE
105039252	XM_010915334,XM_019848414,XM_019848415,XM_019848416,XR_002164001	LOC105039252	26S proteasome regulatory subunit 4 homolog A, transcript variant X1	protein_coding	XP_010913636.1		1950	2483	1272	1214	529822628969017	54158620850611	350943892845131	359885725906407	0.5016	1484	8.77	0.1429	nonDE
105039254	XM_010915336,XM_010915337,XM_010915338,XR_830871	LOC105039254	general transcription and DNA repair factor IIH subunit TFB1-1, transcript variant X1	protein_coding	XP_010913638.1		218	301	263	186	592314528796132	656534227790331	725615124357465	551389991915911	-0.1139	0.1831	5976	0.7934	nonDE
105039255	XM_010915339,XM_029262766	LOC105039255	bifunctional dethiobiotin synthetase/7,8-diamino-pelargonic acid aminotransferase, mitochondrial, transcript variant X2	protein_coding	XP_010913641.1		90	154	97	121	244533521062623	33590123282296	267622308223095	358699940977555	-0.1614	0.187	4904	0.7899	nonDE
105039256	XM_010915342,XM_010915343,XM_010915344	LOC105039256	calmodulin-binding protein 60 C, transcript variant X1	protein_coding	XP_010913644.1		1207	1981	1732	1335	327946622136207	432091131313171	477857564785981	395755720004162	-0.2991	0.6908	8661	0.3971	nonDE
105039259	XM_010915347	LOC105039259	4-coumarate--CoA ligase 2	protein_coding	XP_010913649.1	.	1044	1253	1581	1851	283658884432643	273301457615045	436196772474963	548721975825996	-0.9037	2468	8528	0.04859	downReg
105039260	XM_010915349	LOC105039260	uncharacterized LOC105039260	protein_coding	XP_010913651.1	.	235	211	159	92	638504193885738	460228312504185	438679866056414	272730533635827	0.5202	0.7851	5441	0.349	nonDE
105039261	XM_010915350,XM_019847407	LOC105039261	uncharacterized LOC105039261, transcript variant X2	protein_coding	XP_010913652.1		116	286	155	208	315176538258492	62381657524264	427643894583297	616608163002739	-0.254	0.2899	5581	0.6857	nonDE
105039265	XM_010915357	LOC105039265	histone H4	protein_coding	XP_010913659.1	.	45	145	74	111	122266760531312	316270641294345	204165472252671	32905531775627	-0.3759	0.3143	4506	0.6652	nonDE
105039267	XM_010915359	LOC105039267	NADPH--cytochrome P450 reductase-like	protein_coding	XP_010913661.1	.	1134	1420	1213	1063	308112236538905	309727110784807	334665834922283	315122344842265	-0.1623	0.3764	8308	0.6133	nonDE
105039269	XM_029262768,XM_029262769,XR_003799899	LOC105039269	afadin- and alpha-actinin-binding protein, transcript variant X1	protein_coding	XP_029118601.1		106	130	34	62	288006147029312	283552988746654	938057575214974	18379666397197	1042	1285	4287	0.1843	nonDE
105039272	XM_010915373	LOC105039272	60S ribosomal protein L35a-1	protein_coding	XP_010913675.1	.	598	522	192	293	162478939550498	113857430865964	529726630709632	868587460383667	0.9097	1618	6588	0.1201	nonDE
105039273	XM_010915370,XM_029262770	LOC105039273	uncharacterized LOC105039273, transcript variant X1	protein_coding	XP_010913672.1		134	183	100	85	364083242471017	399155361081829	275899286827933	251979297380927	0.4401	0.7312	4993	0.3741	nonDE
105039274	XM_010915374	LOC105039274	ACT domain-containing protein DS12, chloroplastic	protein_coding	XP_010913676.1	.	296	333	178	174	804243580383738	726331886558738	491100730553722	515816444050369	0.5096	1148	5958	0.2198	nonDE
105039277	XM_010915377	LOC105039277	plasma membrane ATPase	protein_coding	XP_010913679.1	.	500	1158	310	327	135851956145902	252580277668174	855287789166594	969379179336037	0.9476	1776	7023	0.1002	nonDE
105039288	XM_010915396,XR_830883	LOC105039288	villin-5, transcript variant X2	protein_coding	XP_010913698.1	.	1080	1620	1563	1261	293440225275148	353350647515062	43123058531206	373818698820411	-0.4088	1112	8491	0.2293	nonDE
105039291	XM_010915398,XR_003799900,XR_830885,XR_830887	LOC105039291	AUGMIN subunit 1, transcript variant X3	protein_coding	XP_010913700.1	.	120	130	82	86	326044694750164	283552988746654	226237415198905	254943759703056	0.2362	0.298	4763	0.6798	nonDE
105039292	XM_010915401,XM_010915409,XM_010915415,XM_010915431,XM_019855186,XM_029263994	LOC105039292	probable protein phosphatase 2C 52, transcript variant X4	protein_coding	XP_010913703.1		333	407	183	176	904774027931706	887738972460679	504895694895118	521745368694626	0.7121	1775	6087	0.1003	nonDE
105039295	XM_010915402	LOC105039295	glutaredoxin-C8	protein_coding	XP_010913704.1	.	157	170	47	67	426575142298131	370800062207163	129672664809129	198618975582613	1216	1804	4668	0.09668	nonDE
105039297	XM_010915404,XM_029262778	LOC105039297	probable protein phosphatase 2C 59, transcript variant X1	protein_coding	XP_010913706.1		184	206	161	96	499935198616918	449322428321622	444197851792973	284588382924341	0.2968	0.4438	5364	0.5584	nonDE
105039302	XM_010915411	LOC105039302	WRKY transcription factor WRKY51	protein_coding	XP_010913713.1	.	684	893	1206	946	185845476007594	194779091500586	332734539914488	280438135673361	-0.773	2323	7914	0.05635	nonDE
105039306	XM_010915414	LOC105039306	coatomer subunit beta-1	protein_coding	XP_010913716.1	.	153	168	71	149	415706985806459	366437708534138	195888493647833	441704885997155	0.3393	0.3618	5088	0.6261	nonDE
105039309	XM_019848215,XM_029262781,XM_029262783,XM_029262784,XM_029262785	LOC105039309	calcium-transporting ATPase 5, plasma membrane-type, transcript variant X1	protein_coding	XP_019703774.1		1324	1242	1758	1177	359735979874348	270902163094881	485030946243507	348917215314531	-0.4871	1061	8486	0.2435	nonDE
105039311	XM_010915421,XM_019847390	LOC105039311	60S ribosomal protein L7-2, transcript variant X1	protein_coding	XP_010913723.1		850	1220	671	800	230948325448033	266103574054553	185128421461543	237156985770284	0.1555	0.2967	7833	0.681	nonDE
105039313	XM_010915424,XM_019848124,XM_029262787	LOC105039313	mannosyl-oligosaccharide 1,2-alpha-mannosidase MNS1, transcript variant X1	protein_coding	XP_010913726.1		182	251	133	117	494501120371082	547475385964694	366946051481152	346842091689041	0.4539	0.8993	5434	0.3023	nonDE
105039314	XM_010915425,XR_003799910	LOC105039314	GATA transcription factor 17, transcript variant X2	protein_coding	XP_010913727.1	.	129	187	109	87	350498046856426	40788006842788	300730222642447	257908222025184	0.3518	0.554	5026	0.4815	nonDE
105039319	XM_010915434,XM_029262790,XR_002163783	LOC105039319	DNA ligase 4, transcript variant X2	protein_coding	XP_010913736.1		505	764	523	411	137210475707361	166641910309572	144295327011009	121839401439484	0.1014	0.186	7147	0.7909	nonDE
105039321	XM_010915436,XM_010915437	LOC105039321	uncharacterized membrane protein At1g16860, transcript variant X2	protein_coding	XP_010913738.1		320	563	207	374	869452519333771	122800255895666	571111523733822	110870890847608	0.3027	0.3823	6505	0.6084	nonDE
105039323	XM_010915443	LOC105039323	uncharacterized LOC105039323	protein_coding	XP_010913745.1	.	133	186	133	116	361366203348099	405698891591367	366946051481152	343877629366912	0.02136	0.0267	5.21	0.9685	nonDE
105039325	XM_010915440,XM_010915441,XM_029262792	LOC105039325	uncharacterized LOC105039325, transcript variant X1	protein_coding	XP_010913742.3		149	144	159	78	404838829314787	314089464457833	438679866056414	231228061126027	0.01891	0.01741	5081	0.9794	nonDE
105039331	XM_010915454,XM_010915456,XM_019847929,XM_019847930,XM_019847931,XM_029262795	LOC105039331	glycosyltransferase BC10, transcript variant X5	protein_coding	XP_010913756.1		96	117	125	121	260835755800131	255197689871989	344874108534917	358699940977555	-0.5394	0.9341	4919	0.2903	nonDE
105039332	XM_010915457	LOC105039332	V-type proton ATPase catalytic subunit A	protein_coding	XP_010913759.1	.	718	740	499	507	195083409025515	161407085901942	137673744127139	150298239731918	0.2082	0.4201	7321	0.5768	nonDE
105039338	XM_010915468,XM_019848523,XM_019848524,XM_029262798,XM_029262799,XR_003799915	LOC105039338	pumilio homolog 5, transcript variant X6	protein_coding	XP_010913770.1		563	858	766	548	152969302620285	187144972572792	211338853710197	162452535252645	-0.22	0.4578	7469	0.5475	nonDE
105039339	XM_010915471	LOC105039339	transcription factor GTE7	protein_coding	XP_010913773.1	.	327	310	260	159	888471793194197	676164819318945	717338145752627	47134950921844	0.3074	0.4908	6072	0.5241	nonDE
105039342	XM_010915472	LOC105039342	reticulon-like protein B23	protein_coding	XP_010913774.1	.	98	221	99	66	266269834045967	482040080869312	273140293959654	195654513260485	0.5729	0.7013	4854	0.3914	nonDE
105039343	XM_010915474,XM_029262800,XM_029262801	LOC105039343	bZIP transcription factor RISBZ4, transcript variant X3	protein_coding	XP_010913776.1		155	298	178	96	421141064052295	649990697280792	491100730553722	284588382924341	0.3888	0.5283	5471	0.5	nonDE
105039349	XM_010915487	LOC105039349	26S proteasome non-ATPase regulatory subunit 1 homolog A	protein_coding	XP_010913789.1	.	991	1146	1052	1000	269258577081177	249962865464358	290246049742986	296446232212855	-0.2675	0.6746	8108	0.4066	nonDE
105039357	XM_010915496	LOC105039357	probable serine/threonine-protein kinase PBL17	protein_coding	XP_010913798.1	.	113	61	68	160	307025420889738	133051787027276	187611515042995	474313971540569	-0.694	0.5635	4626	0.4752	nonDE
105039359	XM_010915500	LOC105039359	serine/threonine-protein kinase STY13	protein_coding	XP_010913802.1	.	698	877	1028	953	189649330779679	191289208562166	283624466859116	282513259298851	-0.6623	2029	7.86	0.07575	nonDE
105039360	XM_010915504	LOC105039360	abscisic acid receptor PYL8	protein_coding	XP_010913806.1	.	167	263	113	74	453745533527312	573649508002847	311766194115565	219370211837513	0.8651	1555	5197	0.1313	nonDE
105039361	XM_019848345,XM_029262807,XM_029262808,XM_029262809,XM_029262810	LOC105039361	YTH domain-containing protein ECT4-like, transcript variant X2	protein_coding	XP_019703904.2		466	704	398	405	12661402312798	153554849290496	109807916157518	120060724046206	0.1954	0.3969	6985	0.5981	nonDE
105039367	XM_010915507	LOC105039367	probable protein phosphatase 2C 44	protein_coding	XP_010913809.1	.	181	163	176	198	491784081248164	355531824351574	485582744817163	586963539781454	-0.461	0.8052	5566	0.3399	nonDE
105039368	XM_010915508	LOC105039368	chitinase-like protein 1	protein_coding	XP_010913810.1	.	278	383	53	201	755336876171214	835390728384374	146226622018805	595856926747839	1396	1512	5603	0.1377	nonDE
105039369	XM_010915513	LOC105039369	ATP-dependent zinc metalloprotease FTSH 9, chloroplastic/mitochondrial	protein_coding	XP_010913815.2	.	104	123	83	108	282572068783476	268284750891065	228996408067185	320161930789884	-0.0606	0.06254	4778	0.9305	nonDE
105039370	XM_010915509,XM_010915510,XM_029262815,XM_029262816,XR_003799923	LOC105039370	pre-mRNA-splicing factor ATP-dependent RNA helicase DEAH7, transcript variant X1	protein_coding	XP_010913811.1		694	910	1073	808	188562515130512	198487092122658	296039934766373	239528555627987	-0.5515	1577	7827	0.1275	nonDE
105039371	XM_010915511,XM_029262812,XM_029262813,XM_029262814,XR_003799922	LOC105039371	stromal processing peptidase, chloroplastic, transcript variant X3	protein_coding	XP_010913813.1		845	1009	1152	969	229589805886574	220080742804134	317835978425779	287256399014257	-0.5177	1531	8027	0.1354	nonDE
105039372	XM_010915512	LOC105039372	probable calcium-binding protein CML31	protein_coding	XP_010913814.1	.	349	511	551	288	948246653898394	1114581363458	152020507042191	853765148773024	-0.242	0.3659	6.76	0.622	nonDE
105039375	XM_010915516,XM_019848700,XM_029262820,XM_029262821	LOC105039375	kinesin-like protein KIN-14I, transcript variant X1	protein_coding	XP_010913818.1		103	227	88	130	279855029660558	495127141888389	242791372408581	385380101876712	0.2558	0.2703	5083	0.7046	nonDE
105039381	XM_029262054	LOC105039381	protein SWEETIE	protein_coding	XP_029117887.1	.	1152	1672	1241	1135	313002906960158	364692767064928	342391014953465	336466473561591	-0.09729	0.2	8404	0.7743	nonDE
105039422	XM_010915553,XM_019848356	LOC105039422	DExH-box ATP-dependent RNA helicase DExH12, transcript variant X2	protein_coding	XP_010913855.1		9121	11743	14914	10076	247821138401354	256135595911689	41147619637518	298699223577673	-0.5657	1386	11.54	0.1609	nonDE
105039431	XM_010915566,XM_029262849,XM_029262850,XM_029262851,XM_029262852,XR_003799940,XR_003799941,XR_003799942	LOC105039431	pyrophosphate--fructose 6-phosphate 1-phosphotransferase subunit alpha, transcript variant X1	protein_coding	XP_010913868.1		417	401	237	222	113300531425682	874651911441603	653881309782202	658110635512539	0.5019	1086	6339	0.2365	nonDE
105039433	XM_010915567,XM_019848236,XM_019848237,XM_029262843,XM_029262844,XM_029262845,XM_029262846,XM_029262847,XM_029262848,XR_003799938,XR_003799939	LOC105039433	brefeldin A-inhibited guanine nucleotide-exchange protein 1, transcript variant X9	protein_coding	XP_010913869.1		801	959	1054	823	217634833745735	20917485862157	290797848316642	24397524911118	-0.4119	1.13	7898	0.2251	nonDE
105039434	XM_010915568	LOC105039434	bZIP transcription factor 50	protein_coding	XP_010913870.1	.	123	147	103	100	334195812118918	320632994967371	284176265432771	296446232212855	0.07712	0.09343	4952	0.8954	nonDE
105039435	XM_010915569,XM_010915570	LOC105039435	cell division cycle protein 27 homolog B, transcript variant X2	protein_coding	XP_010913871.1		136	150	98	120	369517320716853	327176525476909	270381301091375	355735478655427	0.0719	0.08259	5043	0.907	nonDE
105039437	XM_010915573,XM_029262842	LOC105039437	AT-rich interactive domain-containing protein 5, transcript variant X2	protein_coding	XP_010913875.1		176	287	234	166	478198885633574	625997752079152	645604331177364	49210074547334	-0.129	0.1948	5799	0.7802	nonDE
105039440	XM_010915580	LOC105039440	SWI/SNF complex subunit SWI3B	protein_coding	XP_010913882.1	.	198	279	166	149	537973746337771	60854833738705	45799281613437	441704885997155	0.2589	0.4863	5669	0.5263	nonDE
105039442	XM_010915582,XM_010915583,XM_010915585,XM_019848482,XM_019848483,XM_029262841	LOC105039442	RNA polymerase I-specific transcription initiation factor RRN3, transcript variant X2	protein_coding	XP_010913884.2		889	1655	773	573	241544778027413	360984766442856	213270148717993	169863691057966	0.54	1227	7.89	0.1983	nonDE
105039447	XM_010915592	LOC105039447	GTP 3',8-cyclase, mitochondrial	protein_coding	XP_010913894.1	.	293	400	282	361	796092463014984	87247073460509	778035988854772	107017089828841	-0.2163	0.373	6449	0.6155	nonDE
105039448	XM_010915594,XM_010915595,XM_010915597,XM_010915598,XM_029262840	LOC105039448	uncharacterized LOC105039448, transcript variant X3	protein_coding	XP_010913896.1		122	202	130	94	331478772996	440597720975571	358669072876313	278659458280084	0.1911	0.2568	5125	0.7177	nonDE
105039450	XM_010915599,XM_029262839	LOC105039450	protein N-terminal asparagine amidohydrolase, transcript variant X1	protein_coding	XP_010913901.1		148	216	114	83	402121790191869	471134196686749	314525186983844	24605037273667	0.5503	0.9677	5127	0.2772	nonDE
105039451	XM_010915600	LOC105039451	zinc finger CCCH domain-containing protein 31	protein_coding	XP_010913902.1	.	192	296	154	156	521671511600263	645628343607767	424884901715018	462456122252055	0.3079	0.5714	5668	0.4711	nonDE
105039453	XM_010915604,XM_010915606,XM_029262838	LOC105039453	protein EMSY-LIKE 3, transcript variant X1	protein_coding	XP_010913906.1		196	244	268	231	532539668091935	532207148109105	739410088698862	684790796411696	-0.5109	1222	5947	0.1987	nonDE
105039454	XM_010915607	LOC105039454	protein adenylyltransferase SelO	protein_coding	XP_010913909.1	.	133	297	172	101	361366203348099	647809520444279	474546773344046	299410694534984	0.278	0.3277	5421	0.6526	nonDE
105039455	XM_010915608	LOC105039455	probable serine/threonine-protein kinase DDB_G0280111	protein_coding	XP_010913910.1	.	289	368	283	233	785224306523312	802673075836683	780794981723052	690719721055953	0.01998	0.03084	6257	0.9631	nonDE
105039462	XM_010915615,XM_010915616,XM_010915617,XM_010915618,XR_830914,XR_830915	LOC105039462	uncharacterized LOC105039462, transcript variant X2	protein_coding	XP_010913917.1		287	306	91	134	779790228277476	667440111972894	251068351013419	397237951165226	1114	2027	5581	0.0761	nonDE
105039463	XM_010915619	LOC105039463	TBCC domain-containing protein 1	protein_coding	XP_010913921.1	.	119	129	85	72	323327655627246	281371811910142	234514393803743	213441287193256	0.3171	0.4204	4707	0.5768	nonDE
105039464	XM_019848689,XM_019848690,XM_029262833	LOC105039464	FT-interacting protein 7, transcript variant X1	protein_coding	XP_019704248.1		102	228	20	77	27713799053764	497308318724901	551798573655867	228263598803899	1714	1489	4365	0.142	nonDE
105039467	XM_010915624	LOC105039467	60S ribosomal protein L6	protein_coding	XP_010913926.1	.	191	292	140	139	518954472477345	636903636261716	386259001559107	412060262775869	0.4456	0.885	5586	0.3068	nonDE
105039469	XM_010915627,XM_010915628	LOC105039469	uncharacterized LOC105039469, transcript variant X1	protein_coding	XP_010913929.1		190	247	405	216	516237433354427	538750678618643	111739211165313	640323861579768	-0.7763	1482	6065	0.1431	nonDE
105039472	XM_019848409,XM_019848410,XM_029262832,XR_002163994,XR_002163995,XR_002163996,XR_002163997,XR_002163998,XR_002163999	LOC105039472	SURP and G-patch domain-containing protein 1-like protein, transcript variant X4	protein_coding	XP_019703968.1		158	194	144	117	429292181421049	423148306283469	397294973032224	346842091689041	0.09994	0.1421	5319	0.8402	nonDE
105039476	XM_029262829	LOC105039476	zinc finger A20 and AN1 domain-containing stress-associated protein 8	protein_coding	XP_029118662.1	.	559	897	650	253	151882486971118	195651562235192	179334536438157	750008967498524	0.4748	0.6369	7145	0.4295	nonDE
105039480	XM_010915642,XM_010915643	LOC105039480	zinc transporter ZTP29, transcript variant X2	protein_coding	XP_010913944.1		102	203	83	89	27713799053764	442778897812083	228996408067185	263837146669441	0.4635	0.6172	4882	0.4421	nonDE
105039482	XM_010915645	LOC105039482	outer envelope protein 80, chloroplastic-like	protein_coding	XP_010913947.1	.	91	141	107	62	247250560185541	307545933948294	295212236905889	18379666397197	0.1494	0.1567	4671	0.8244	nonDE
105039483	XM_010915646	LOC105039483	copper-transporting ATPase HMA4	protein_coding	XP_010913948.1	.	182	177	743	746	494501120371082	386068300062752	204993170113155	22114888923079	-2388	4857	6594	0.00764	downReg
105039485	XM_010915648,XM_010915649	LOC105039485	ADP,ATP carrier protein 1, mitochondrial, transcript variant X2	protein_coding	XP_010913950.1		1669	2309	1350	1347	45347382961502	503633731550788	37246403721771	399313074790716	0.2185	0.5222	8746	0.5046	nonDE
105039488	XM_010915651,XM_010915653	LOC105039488	E3 ubiquitin-protein ligase UPL5, transcript variant X2	protein_coding	XP_010913953.1		372	417	407	381	101073855372551	909550740825807	112291009738969	112946014473098	-0.3261	0.7451	6701	0.3677	nonDE
105039489	XM_010915654	LOC105039489	glycerophosphodiester phosphodiesterase GDPDL4	protein_coding	XP_010913956.1	.	1056	774	1854	1838	286919331380144	168823087146085	511517277778989	544868174807228	-1359	2787	8414	0.03483	downReg
105039490	gene-LOC105039490	LOC105039490	.	pseudogene	.	.	149	158	244	119	404838829314787	344625940169011	673194259860158	352771016333298	-0.5072	0.7311	5.42	0.3741	nonDE
105039492	XM_010915657,XM_010915658	LOC105039492	fimbrin-4, transcript variant X1	protein_coding	XP_010913959.1		180	145	131	111	489067042125246	316270641294345	361428065744593	32905531775627	0.06018	0.06455	5208	0.928	nonDE
105039494	XM_010915663,XR_003800562,XR_003800564,XR_830922,XR_830923	LOC105039494	protein SEH1, transcript variant X2	protein_coding	XP_010913965.1	.	274	436	271	158	744468719679542	950993100719548	7476870673037	468385046896312	0.4125	0.7359	6144	0.3718	nonDE
105039495	XM_010915661,XM_019848497,XM_019848498,XM_019848499,XM_029262827,XR_003799935,XR_830919	LOC105039495	DNA topoisomerase 1 beta, transcript variant X7	protein_coding	XP_010913963.1		596	844	722	596	161935531725915	184091325001674	199199285089768	176681954398862	-0.2089	0.4815	7493	0.5302	nonDE
105039498	XM_010915666	LOC105039498	transcription initiation factor TFIID subunit 6	protein_coding	XP_010913968.1	.	314	388	368	308	853150284596263	846296612566938	10153093755268	913054395215595	-0.2726	0.5999	6501	0.4539	nonDE
105039499	XM_010915667,XR_003799934	LOC105039499	serine/threonine-protein phosphatase PP-X isozyme 2, transcript variant X1	protein_coding	XP_010913969.1	.	564	772	493	457	153241006532577	168386851778782	136018348406171	135475928121275	0.1541	0.326	7208	0.6548	nonDE
105039501	XM_010915669	LOC105039501	fumarylacetoacetase	protein_coding	XP_010913971.1	.	657	910	329	423	178509470375715	198487092122658	907708653663901	125396756226038	0.7337	1767	7148	0.1011	nonDE
105039502	XM_010915670	LOC105039502	65-kDa microtubule-associated protein 1	protein_coding	XP_010913972.1	.	223	323	131	194	605899724410722	70452011819361	361428065744593	57510569049294	0.4467	0.7507	5774	0.3656	nonDE
105039506	XM_010915675	LOC105039506	sodium/hydrogen exchanger 6	protein_coding	XP_010913977.1	.	1022	1267	1087	911	277681398362223	276355105186162	299902524781964	270062517545911	-0.1293	0.2833	8134	0.6929	nonDE
105039512	XM_010915682	LOC105039512	bifunctional aspartokinase/homoserine dehydrogenase 1, chloroplastic	protein_coding	XP_010913984.1	.	592	651	449	312	160848716076748	141994612056978	123878779785742	924912244504109	0.3989	0.8917	6992	0.3048	nonDE
105039520	XM_010915695,XM_010915696,XM_010915697	LOC105039520	ubiquitin-conjugating enzyme E2 8, transcript variant X3	protein_coding	XP_010913997.1		234	337	164	143	63578715476282	735056593904789	452474830397811	423918112064383	0.5519	1245	5778	0.1935	nonDE
105039522	XM_010915701,XM_010915702,XR_003799931	LOC105039522	uncharacterized WD repeat-containing protein C2A9.03, transcript variant X1	protein_coding	XP_010914003.1		342	494	259	172	929227380037968	107750135723729	714579152884348	509887519406111	0.6344	1448	6283	0.1484	nonDE
105039523	XM_010915703,XM_010915704,XM_010915705,XM_010915706,XM_010915707,XM_010915708,XM_010915709,XM_010915710,XM_029262823,XM_029262824	LOC105039523	phosphatidylinositol/phosphatidylcholine transfer protein SFH13, transcript variant X1	protein_coding	XP_010914005.1		202	171	116	104	548841902829443	372981239043676	320043172720403	30830408150137	0.4097	0.5976	5242	0.4557	nonDE
105039526	XM_019848191	LOC105039526	cinnamoyl-CoA reductase 1-like	protein_coding	XP_019703750.1	.	242	606	106	109	657523467746164	132179316292671	292453244037609	323126393112012	1531	2246	5747	0.06033	nonDE
105039544	XM_010915725,XM_010915727,XM_010915729,XM_029262855	LOC105039544	monogalactosyldiacylglycerol synthase 1, chloroplastic, transcript variant X4	protein_coding	XP_010914027.1		232	262	260	213	630353076516984	571468331166334	717338145752627	631430474613382	-0.2622	0.519	5993	0.5067	nonDE
105039547	XM_010915733	LOC105039547	protein TSS	protein_coding	XP_010914035.1	.	200	348	351	238	543407824583607	759049539106429	968406496766046	705542032666596	-0.4482	0.8738	6.19	0.3106	nonDE
105039550	XM_010915735	LOC105039550	nudix hydrolase 3	protein_coding	XP_010914037.1	.	441	583	364	374	119821425320685	127162609568692	100427340405368	110870890847608	0.1377	0.2648	6836	0.7102	nonDE
105039551	XR_002163657	LOC105039551	uncharacterized LOC105039551	lncRNA	.	.	229	236	189	148	62220195914823	514757733417003	521449652104794	438740423675026	0.138	0.2121	5705	0.7633	nonDE
105039552	XM_010915741	LOC105039552	zinc finger CCCH domain-containing protein 18	protein_coding	XP_010914043.1	.	158	292	147	103	429292181421049	636903636261716	405571951637062	305339619179241	0.4843	0.7959	5428	0.3442	nonDE
105039553	XM_010915742	LOC105039553	probable serine incorporator	protein_coding	XP_010914044.1	.	555	724	495	580	150795671321951	157917202963521	136570146979827	171938814683456	-0.07692	0.1304	7266	0.8551	nonDE
105039559	XM_010915751	LOC105039559	mitochondrial adenine nucleotide transporter ADNT1	protein_coding	XP_010914053.1	.	523	491	345	271	142101146128613	107095782672775	951852539556371	803369289296838	0.3945	0.8069	6.7	0.3391	nonDE
105039560	XM_010915747	LOC105039560	S-adenosylmethionine decarboxylase proenzyme	protein_coding	XP_010914049.1	.	112	132	115	129	30430838176682	28791534241968	317284179852123	382415639554584	-0.325	0.4939	5011	0.5234	nonDE
105039561	XM_010915748,XM_010915749,XM_010915750,XM_029262857	LOC105039561	5'-nucleotidase domain-containing protein DDB_G0275467, transcript variant X4	protein_coding	XP_010914050.1		38	72	109	153	103247486670885	157044732228916	300730222642447	453562735285669	-1565	2063	4449	0.07334	nonDE
105039562	XM_010915753	LOC105039562	UDP-glucuronate 4-epimerase 1	protein_coding	XP_010914055.1	.	743	869	726	706	20187600683281	189544267092956	20030288223708	209291039942276	-0.1573	0.3407	7646	0.6412	nonDE
105039578	XM_010915769	LOC105039578	eukaryotic translation initiation factor 3 subunit C	protein_coding	XP_010914071.1	.	299	224	316	223	812394697752492	488583611378851	87184174637627	661075097834668	-0.3796	0.5792	6115	0.4668	nonDE
105039584	XM_010915776	LOC105039584	probable alpha,alpha-trehalose-phosphate synthase [UDP-forming] 9	protein_coding	XP_010914078.1	.	625	393	1114	1130	169814945182377	857202496749501	307351805526318	334984242400527	-1522	2741	7621	0.03688	downReg
105039586	XM_010915778,XM_029262863,XR_003799957,XR_003799958	LOC105039586	serine/arginine-rich splicing factor RSZ21A, transcript variant X4	protein_coding	XP_010914080.1		429	547	360	287	116560978373184	119310372957246	99323743258056	850800686450895	0.2666	0.5925	6704	0.4584	nonDE
105039587	XM_010915779	LOC105039587	probable cyclic nucleotide-gated ion channel 14	protein_coding	XP_010914081.1	.	104	264	67	102	282572068783476	57583068483936	184852522174715	302375156857113	0.746	0.8354	4956	0.3272	nonDE
105039588	gene-LOC105039588	LOC105039588	.	pseudogene	.	.	107	101	83	186	29072318615223	220298860487785	228996408067185	551389991915911	-0.5713	0.5722	4913	0.4706	nonDE
105039589	XM_010915781	LOC105039589	UDP-galactose/UDP-glucose transporter 7	protein_coding	XP_010914083.1	.	126	165	190	133	342346929487672	3598941780246	524208644973074	394273488843098	-0.4705	0.8833	5325	0.3073	nonDE
105039592	XM_010915789,XM_010915798	LOC105039592	serine/threonine-protein kinase HSL1-like, transcript variant X1	protein_coding	XP_010914091.1		153	152	255	133	415706985806459	331538879149934	70354318141123	394273488843098	-0.6296	0.9933	5471	0.2683	nonDE
105039593	XM_010915790,XM_010915791	LOC105039593	50S ribosomal protein L4, transcript variant X1	protein_coding	XP_010914092.1		115	257	72	61	312459499135574	56056244698377	198647486516112	180832201649842	1.08	1448	4823	0.1484	nonDE
105039615	XM_010915823,XM_010915824	LOC105039615	calmodulin-binding protein 60 B, transcript variant X1	protein_coding	XP_010914125.1		536	836	465	400	145633296988407	182346383532464	128293168374989	118578492885142	0.3153	0.7382	7149	0.3708	nonDE
105039619	XM_010915829	LOC105039619	4-coumarate--CoA ligase 1	protein_coding	XP_010914131.1	.	529	468	454	943	143731369602364	102079075948796	125258276219882	279548796976723	-0.7187	0.9525	7235	0.2838	nonDE
105039636	XM_010915848,XR_830947	LOC105039636	NADPH--cytochrome P450 reductase, transcript variant X1	protein_coding	XP_010914150.1	.	647	1256	698	646	175792431252797	273955810665998	192577702205898	191504266009505	0.107	0.1714	7682	0.8057	nonDE
105039637	NM_001303564,XM_019846991	LOC105039637	AP2-like ethylene-responsive transcription factor AIL5	protein_coding	NP_001290493.1		96	161	96	159	260835755800131	351169470678549	264863315354816	47134950921844	-0.262	0.2935	5037	0.6831	nonDE
105039638	XM_010915851,XM_010915852	LOC105039638	VIN3-like protein 2, transcript variant X1	protein_coding	XP_010914153.1		250	411	289	342	679259780729509	89646367980673	797348938932728	101384611416797	-0.2862	0.5227	6391	0.5042	nonDE
105039641	XM_010915855,XR_003799973	LOC105039641	U4/U6.U5 small nuclear ribonucleoprotein 27 kDa protein, transcript variant X2	protein_coding	XP_010914157.1	.	162	132	114	92	440160337912722	28791534241968	314525186983844	272730533635827	0.144	0.1591	5019	0.8216	nonDE
105039645	XM_010915858,XM_010915859,XM_010915860	LOC105039645	uncharacterized LOC105039645, transcript variant X1	protein_coding	XP_010914160.1		233	317	229	168	633070115639902	691433057174534	631809366835968	498029670117597	0.1437	0.2428	5932	0.7319	nonDE
105039646	XM_010915862	LOC105039646	cytoplasmic 60S subunit biogenesis factor REI1 homolog 1	protein_coding	XP_010914164.1	.	412	632	408	458	111942011864223	137850376067604	112566909025797	135772374353488	-0.07559	0.1231	6955	0.8648	nonDE
105039648	XM_010915864	LOC105039648	aldehyde dehydrogenase family 2 member B7, mitochondrial	protein_coding	XP_010914166.1	.	1469	2121	2206	1538	399133047156659	462627607024349	608633826742421	455934305143372	-0.384	0.9462	8895	0.2857	nonDE
105039650	XM_010915865,XM_019848761	LOC105039650	U4/U6 small nuclear ribonucleoprotein Prp31 homolog, transcript variant X2	protein_coding	XP_010914167.1		520	590	490	353	141286034391738	128689433354251	135190650545687	104645519971138	0.08354	0.1412	6986	0.8413	nonDE
105039655	XM_010915871	LOC105039655	adagio-like protein 1	protein_coding	XP_010914173.1	.	288	348	569	425	782507267400394	759049539106429	156986694205094	125989648690464	-0.9612	2532	6704	0.04565	downReg
105039658	XM_010915881,XM_010915890	LOC105039658	ubiquitin-conjugating enzyme E2 28, transcript variant X1	protein_coding	XP_010914183.1		1480	2995	1405	1364	402121790191869	653262462535561	387638497993247	404352660738335	0.2787	0.5201	8816	0.5061	nonDE
105039659	XM_010915878	LOC105039659	COP9 signalosome complex subunit 5a	protein_coding	XP_010914180.1	.	389	435	220	223	105692821881512	948811923883036	606978431021454	661075097834668	0.5669	1364	6318	0.1658	nonDE
105039662	XM_010915888,XM_029262884	LOC105039662	plasma membrane ATPase, transcript variant X2	protein_coding	XP_010914190.1		2080	2366	5202	8776	565144137566951	516066439518911	143522809007891	260161213390002	-1.93	3571	9997	0.01779	downReg
105039666	XM_010915893,XM_019848758	LOC105039666	uncharacterized LOC105039666, transcript variant X2	protein_coding	XP_010914195.1		384	997	542	234	104334302320053	217463330600319	14953741346074	693684183378082	0.4841	0.5443	6954	0.4881	nonDE
105039674	XM_010915905	LOC105039674	muscle M-line assembly protein unc-89	protein_coding	XP_010914207.1	.	178	237	214	130	48363296387941	516938910253516	590424473811778	385380101876712	-0.03361	0.04203	5614	0.9521	nonDE
105039675	XM_010915906	LOC105039675	probable protein S-acyltransferase 19	protein_coding	XP_010914208.1	.	136	277	187	136	369517320716853	604185983714025	515931666368236	403166875809483	-0.02286	0.02548	5541	0.9706	nonDE
105039679	XM_010915916,XM_010915917,XM_010915918	LOC105039679	probable potassium transporter 11, transcript variant X1	protein_coding	XP_010914218.1		297	309	584	290	806960619506656	673983642482432	161125183507513	859694073417281	-0.7774	1382	6544	0.1616	nonDE
105039680	NM_001319907	LOC105039680	nuclear transcription factor Y subunit C-2-like	protein_coding	NP_001306836.1	.	149	420	105	97	404838829314787	916094271335345	28969425116933	28755284524647	1011	1269	5395	0.1879	nonDE
105039684	XM_010915928,XM_010915930,XM_010915932,XM_029262888	LOC105039684	bifunctional purine biosynthesis protein PurH, transcript variant X1	protein_coding	XP_010914230.1		369	597	444	353	100258743635675	13021625713981	122499283351602	104645519971138	-0.07223	0.1186	6831	0.8699	nonDE
105039685	XM_010915933	LOC105039685	glyceraldehyde-3-phosphate dehydrogenase GAPCP2, chloroplastic	protein_coding	XP_010914235.1	.	861	555	377	445	233937068483243	121055314426456	104014031134131	131918573334721	0.4175	0.5682	7135	0.4727	nonDE
105039687	XM_010915934,XM_010915935	LOC105039687	UDP-N-acetylglucosamine diphosphorylase 1, transcript variant X2	protein_coding	XP_010914236.1		751	1357	300	682	204049638131144	295985696714777	8276978604838	202176330369167	0.8485	1153	7479	0.2182	nonDE
105039689	XM_010915940,XM_010915941,XM_019847037,XR_002163627,XR_002163629,XR_003799987	LOC105039689	probable serine/threonine protein kinase IRE4, transcript variant X1	protein_coding	XP_010914242.1		142	178	203	182	385819555454361	388249476899265	560075552260705	539532142627397	-0.5984	1346	5532	0.1697	nonDE
105039690	XM_010915942	LOC105039690	cytochrome P450 97B2, chloroplastic	protein_coding	XP_010914244.1	.	221	283	162	165	600465646164886	617273044733101	446956844661252	489136283151212	0.2927	0.5684	5741	0.4727	nonDE
105039692	XM_010915944	LOC105039692	40S ribosomal protein S11	protein_coding	XP_010914246.1	.	226	280	144	121	614050841779476	610729514223563	397294973032224	358699940977555	0.6009	1311	5592	0.1785	nonDE
105039695	XM_010915947	LOC105039695	choline-phosphate cytidylyltransferase 2	protein_coding	XP_010914249.1	.	1256	1637	1811	1559	341260113838505	357058648137133	499653608445388	462159676019842	-0.5512	1674	8678	0.1112	nonDE
105039699	XM_010915952,XM_019848746,XM_029262890	LOC105039699	probable allantoate deiminase, transcript variant X1	protein_coding	XP_010914254.1		116	171	85	46	315176538258492	372981239043676	234514393803743	136365266817914	0.8331	1194	4639	0.2057	nonDE
105039701	XM_010915956,XM_029262891,XR_002164054	LOC105039701	protein SUPPRESSOR OF FRI 4, transcript variant X3	protein_coding	XP_010914258.1		256	352	389	235	695562015467017	767774246452479	107324822576066	69664864570021	-0.3355	0.6182	6315	0.4416	nonDE
105039703	XM_010915960,XM_010915968,XM_029263879	LOC105039703	G-box-binding factor 3, transcript variant X1	protein_coding	XP_010914262.1		197	227	226	212	535256707214853	495127141888389	62353238823113	628466012291254	-0.377	0.8062	5.83	0.3394	nonDE
105039711	XM_010915965	LOC105039711	ALA-interacting subunit 1	protein_coding	XP_010914267.1	.	1122	1405	2122	1777	304851789591403	306455345530038	585458286648875	526784954642244	-0.9513	2897	8687	0.0313	downReg
105039714	XM_010915973,XM_010915974,XM_010915976,XM_019848767,XM_029262906,XM_029262907,XR_830968,XR_830969	LOC105039714	deoxyhypusine synthase, transcript variant X3	protein_coding	XP_010914275.1		200	175	90	112	543407824583607	381705946389727	24830935814514	332019780078398	0.5643	0.831	5182	0.329	nonDE
105039715	XM_010915981,XM_010915990,XR_003800536,XR_003800537,XR_830972	LOC105039715	uncharacterized LOC105039715, transcript variant X2	protein_coding	XP_010914283.1		222	235	184	206	603182685287804	512576556580491	507654687763398	610679238358482	-0.09621	0.1406	5802	0.8419	nonDE
105039716	XM_010915977,XM_010915978,XR_830970	LOC105039716	succinate-semialdehyde dehydrogenase, mitochondrial, transcript variant X3	protein_coding	XP_010914279.1		1608	1920	826	821	43689989096522	418785952610443	227892810919873	243382356646754	0.7716	2307	8311	0.05684	nonDE
105039718	XM_010916333,XM_010917804,XR_831244	LOC105039718	protein SYS1 homolog, transcript variant X1	protein_coding	XP_010914635.1		149	156	186	109	404838829314787	340263586495985	513172673499956	323126393112012	-0.2591	0.3586	5286	0.6285	nonDE
105039720	XM_010915984	LOC105039720	translation initiation factor IF-2	protein_coding	XP_010914286.1	.	128	130	44	58	347781007733508	283552988746654	121395686204291	171938814683456	1012	1375	4423	0.1638	nonDE
105039722	XM_010915986,XM_029262911,XM_029262913	LOC105039722	multiple RNA-binding domain-containing protein 1, transcript variant X2	protein_coding	XP_010914288.1		390	493	419	261	105964525793803	107532018040077	115601801180904	773724666075553	0.07917	0.1191	6653	0.8693	nonDE
105039747	XM_010916010,XM_010916015	LOC105039747	V-type proton ATPase subunit E, transcript variant X1	protein_coding	XP_010914312.1		1874	2917	920	1045	50917313163484	636249283210762	253827343881699	309786312662434	0.9296	2.49	8643	0.0475	upReg
105039763	XM_010916020	LOC105039763	26S proteasome non-ATPase regulatory subunit 8 homolog A	protein_coding	XP_010914322.1	.	361	554	286	277	98085112337341	120837196742805	78907196032789	82115606322961	0.3504	0.7884	6551	0.3477	nonDE
105039769	XM_010916033,XM_010916034	LOC105039769	potassium transporter 7, transcript variant X2	protein_coding	XP_010914335.1		222	386	264	174	603182685287804	841934258893912	728374117225744	515816444050369	0.1272	0.1827	6049	0.7938	nonDE
105039770	XM_010916035,XM_019848360,XR_003799999	LOC105039770	piezo-type mechanosensitive ion channel homolog, transcript variant X1	protein_coding	XP_010914337.1		555	678	1044	710	150795671321951	147883789515563	288038855448363	210476824871127	-0.8149	2182	7584	0.06487	nonDE
105039774	XM_010916037,XM_010916038,XM_010916039,XM_010916040	LOC105039774	putative E3 ubiquitin-protein ligase RF298, transcript variant X1	protein_coding	XP_010914339.1		257	365	303	246	698279054589935	796129545327145	835974839088638	729257731243625	-0.156	0.29	6256	0.6856	nonDE
105039779	XM_010916045,XM_010916046,XM_029262917	LOC105039779	nuclear pore complex protein NUP107, transcript variant X1	protein_coding	XP_010914347.1		226	452	395	269	614050841779476	985891930103752	108980218297034	797440364652581	-0.3434	0.573	6415	0.4701	nonDE
105039784	XM_010916050,XM_010916051	LOC105039784	receptor-like cytosolic serine/threonine-protein kinase RBK2, transcript variant X2	protein_coding	XP_010914352.1		126	373	46	89	342346929487672	813578960019247	126913671940849	263837146669441	1498	1458	4966	0.1475	nonDE
105039789	XM_010916059	LOC105039789	ribosome biogenesis protein NOP53	protein_coding	XP_010914361.1	.	433	614	585	348	117647794022351	133924257761881	161401082794341	103163288810074	-0.1333	0.2102	6993	0.7644	nonDE
105039790	XM_010916060,XM_010916061,XM_010916062,XM_029262919	LOC105039790	squamosa promoter-binding-like protein 9, transcript variant X1	protein_coding	XP_010914362.1		131	148	310	239	355932125102263	322814171803883	855287789166594	708506494988725	-1302	2925	5687	0.03039	downReg
105039793	XM_010916066	LOC105039793	histone H2AX	protein_coding	XP_010914368.1	.	125	194	99	127	339629890364754	423148306283469	273140293959654	376486714910326	0.1792	0.2304	5129	0.7448	nonDE
105039794	XM_010916067	LOC105039794	serine/threonine-protein phosphatase BSL1 homolog	protein_coding	XP_010914369.2	.	1225	1950	1801	1390	332837292557459	425329483119981	496894615577108	412060262775869	-0.3569	0.8831	8689	0.3073	nonDE
105039795	XM_010916071	LOC105039795	lipase	protein_coding	XP_010914373.1	.	134	87	614	444	364083242471017	189762384776607	169402162112351	131622127102508	-2663	4103	5973	0.01531	downReg
105039798	XM_010916077	LOC105039798	BTB/POZ domain-containing protein POB1	protein_coding	XP_010914379.1	.	467	855	865	409	126885727040272	186490619521838	238652883106162	121246508975058	-0.2338	0.3013	7339	0.6768	nonDE
105039800	XM_010916076,XM_029262921	LOC105039800	general transcription and DNA repair factor IIH helicase subunit XPD, transcript variant X1	protein_coding	XP_010914378.2		110	174	155	96	298874303520984	379524769553214	427643894583297	284588382924341	-0.1396	0.1712	5105	0.8059	nonDE
105039801	XM_010916078	LOC105039801	sister-chromatid cohesion protein 3	protein_coding	XP_010914380.1	.	517	867	439	447	140470922654862	189108031725653	121119786917463	132511465799146	0.2812	0.5902	7168	0.4593	nonDE
105039802	XM_010916080,XM_029262922	LOC105039802	cyclin-L1-1, transcript variant X2	protein_coding	XP_010914382.1		685	1283	1278	895	186117179919885	279844988124583	352599288566099	265319377830506	-0.5095	1121	8046	0.2281	nonDE
105039809	XM_010916087,XR_003800001,XR_830987	LOC105039809	syntaxin-132, transcript variant X3	protein_coding	XP_010914389.1	.	455	812	401	265	123625280092771	177111559124833	110635614018001	785582515364067	0.5809	1221	6878	0.199	nonDE
105039818	XM_010916101,XM_010916102,XM_029262928	LOC105039818	uncharacterized LOC105039818, transcript variant X3	protein_coding	XP_010914403.1		128	176	227	163	347781007733508	38388712322624	626291381099409	483207358506954	-0.6799	1.45	5491	0.1484	nonDE
105039821	XM_010916104,XM_010916105	LOC105039821	bifunctional 3-dehydroquinate dehydratase/shikimate dehydrogenase, chloroplastic, transcript variant X1	protein_coding	XP_010914406.1		508	762	582	687	138025587444236	16620567494227	160573384933857	203658561530232	-0.3387	0.7444	7372	0.368	nonDE
105039832	XM_010916122	LOC105039832	40S ribosomal protein S21	protein_coding	XP_010914424.1	.	232	320	152	143	630353076516984	697976587684072	419366915978459	423918112064383	0.5649	1272	5729	0.1875	nonDE
105039833	XM_010916123	LOC105039833	protein RALF-like 33	protein_coding	XP_010914425.1	.	90	142	104	92	244533521062623	309727110784807	286935258301051	272730533635827	-0.096	0.1107	4801	0.8789	nonDE
105039839	XM_010916128,XM_010916129,XM_010916130,XM_010916131	LOC105039839	uncharacterized LOC105039839, transcript variant X1	protein_coding	XP_010914430.1		1777	2148	2758	2617	482817852142535	468516784482933	760930233071441	775799789701043	-0.7818	2.36	9.24	0.05418	nonDE
105039840	XM_010916133,XM_010916134,XM_010916135,XM_010916137,XM_010916138,XM_019848335,XM_019848338,XM_029262934,XR_002163961,XR_003800003,XR_003800004,XR_003800005,XR_830996,XR_830997	LOC105039840	DNA mismatch repair protein PMS1, transcript variant X14	protein_coding	XP_010914435.1		213	254	220	134	578729333181541	554018916474232	606978431021454	397237951165226	0.1002	0.1379	5724	0.8452	nonDE
105039842	XM_010916141,XM_019848368,XM_029262935,XR_003800007	LOC105039842	ABC transporter C family member 14, transcript variant X4	protein_coding	XP_010914443.1		182	93	370	230	494501120371082	202849445795684	102082736126335	681826334089568	-1579	2203	5688	0.06301	nonDE
105039844	XM_029262936	LOC105039844	kinesin-like protein KIN-13A	protein_coding	XP_029118769.1	.	1069	1702	1054	1083	290451482239938	371236297574466	290797848316642	321051269486522	0.01298	0.02119	8308	0.9758	nonDE
105039846	XM_010916147,XM_010916148	LOC105039846	auxilin-related protein 2, transcript variant X2	protein_coding	XP_010914449.1		115	111	153	169	312459499135574	242110628852913	422125908846738	500994132439726	-0.8528	1585	5158	0.1261	nonDE
105039847	XM_019848369	LOC105039847	translationally-controlled tumor protein homolog	protein_coding	XP_019703928.1	.	279	413	201	197	758053915294132	900826033479756	554557566524146	583999077459325	0.4517	1027	6103	0.2564	nonDE
105039850	XM_010916184,XM_010916255,XM_010916436,XM_010916504,XM_010916575,XR_831032,XR_831038,XR_831042	LOC105039850	protein TIFY 8, transcript variant X3	protein_coding	XP_010914486.1		138	235	97	103	374951398962689	512576556580491	267622308223095	305339619179241	0.5472	0.9127	5151	0.2978	nonDE
105039854	XM_010916158,XM_019848787,XM_019848788,XM_019848789,XM_029262941,XM_029262943	LOC105039854	magnesium/proton exchanger 1, transcript variant X2	protein_coding	XP_010914460.1		177	301	249	174	480915924756492	656534227790331	686989224201554	515816444050369	-0.1679	0.2593	5857	0.7152	nonDE
105039861	XM_010916173	LOC105039861	serine/threonine-protein phosphatase PP1	protein_coding	XP_010914475.1	.	258	349	412	411	700996093712853	761230715942941	113670506173109	121839401439484	-0.7751	2.07	6537	0.07324	nonDE
105039870	XM_010916182	LOC105039870	60S ribosomal protein L18-3	protein_coding	XP_010914484.1	.	1058	1748	806	848	287462739204728	381269711022424	222374825183314	251386404916501	0.3957	0.9604	8129	0.2803	nonDE
105039883	XM_010916194,XM_010916195,XR_003800012	LOC105039883	trafficking protein particle complex II-specific subunit 130 homolog, transcript variant X1	protein_coding	XP_010914496.1		1615	2111	1259	1241	438801818351263	460446430187836	347357202116368	367889774176154	0.2399	0.5962	8647	0.4569	nonDE
105039888	XM_010916199,XM_010916200,XM_010916201,XM_019848638,XM_029262951	LOC105039888	probable ethylene response sensor 1, transcript variant X5	protein_coding	XP_010914501.1		338	367	263	188	918359223546296	80049189900017	725615124357465	557318916560168	0.3306	0.6565	6209	0.4174	nonDE
105039892	XM_010916205	LOC105039892	probable polygalacturonase	protein_coding	XP_010914507.1	.	120	194	165	140	326044694750164	423148306283469	45523382326609	415024725097998	-0.3012	0.5148	5333	0.5096	nonDE
105039896	XM_010916210	LOC105039896	importin subunit alpha-1b	protein_coding	XP_010914512.1	.	1930	2226	1939	1700	524388550723181	485529963807733	534968717159363	503958594761854	-0.1306	0.2784	9	0.697	nonDE
105039901	XM_010916219,XM_019848763	LOC105039901	kinesin-like protein KIN-14Q, transcript variant X1	protein_coding	XP_010914521.1		60	184	28	139	163022347375082	401336537918342	772518003118214	412060262775869	0.5765	0.3292	4429	0.6521	nonDE
105039902	XM_010916220,XM_010916222,XM_019847935,XM_029262957	LOC105039902	uncharacterized LOC105039902, transcript variant X3	protein_coding	XP_010914522.1		109	181	85	65	296157264398066	394793007408803	234514393803743	192690050938356	0.6069	0.9127	4.76	0.2978	nonDE
105039915	XM_010916236	LOC105039915	probable protein disulfide-isomerase A6	protein_coding	XP_010914538.1	.	246	325	244	230	668391624237836	708882471866636	673194259860158	681826334089568	-0.06646	0.109	6096	0.8801	nonDE
105039924	XM_010916249	LOC105039924	GTP-binding protein SAR1A	protein_coding	XP_010914551.1	.	131	115	149	120	355932125102263	250835336198963	411089937373621	355735478655427	-0.4889	0.7798	5085	0.3513	nonDE
105039925	XM_010916250	LOC105039925	dihydrolipoyl dehydrogenase 2, chloroplastic	protein_coding	XP_010914552.1	.	679	258	173	208	184486956446135	562743623820283	477305766212325	616608163002739	0.7866	0.7238	6219	0.3778	nonDE
105039926	XM_029262964	LOC105039926	calreticulin	protein_coding	XP_029118797.1	.	399	678	56	132	10840986100443	147883789515563	154503600623643	391309026520969	2316	3.13	5807	0.02541	upReg
105039928	XM_010916252,XM_010916253	LOC105039928	zinc finger CCHC domain-containing protein 10, transcript variant X2	protein_coding	XP_010914554.1		108	195	69	101	293440225275148	425329483119982	190370507911274	299410694534984	0.5215	0.6805	4867	0.4026	nonDE
105039929	XM_010916257,XM_010916258,XM_029262965,XM_029262966,XM_029262967,XM_029262968,XM_029262969	LOC105039929	serine/threonine-protein phosphatase 4 regulatory subunit 3, transcript variant X3	protein_coding	XP_010914559.1		602	925	769	452	163565755199666	201758857377427	212166551570681	133993696960211	0.01585	0.0213	7452	0.9758	nonDE
105039934	XM_019848656	LOC105039934	lon protease homolog, mitochondrial	protein_coding	XP_019704215.1	.	746	1127	595	414	202691118569685	245818629474984	16416007566262	122728740136122	0.5606	1.42	7477	0.1536	nonDE
105039942	XM_010916270,XM_019848596	LOC105039942	uncharacterized LOC105039942, transcript variant X2	protein_coding	XP_010914572.1		162	204	266	169	440160337912722	444960074648596	733892102962303	500994132439726	-0.5529	1106	5699	0.231	nonDE
105039945	XM_010916274,XM_010916275,XM_019848775,XM_029262974	LOC105039945	solute carrier family 40 member 2, chloroplastic, transcript variant X1	protein_coding	XP_010914576.1		143	151	101	108	388536594577279	329357702313422	278658279696213	320161930789884	0.1578	0.2033	5037	0.7713	nonDE
105039948	XM_010916280	LOC105039948	dual specificity protein kinase shkD-like	protein_coding	XP_010914582.3	.	111	191	156	127	301591342643902	416604775773931	430402887451576	376486714910326	-0.2531	0.3878	5244	0.6044	nonDE
105039952	XM_010916282,XM_010916283,XM_019848705	LOC105039952	probable protein phosphatase 2C 42, transcript variant X2	protein_coding	XP_010914584.1		208	210	221	174	565144137566951	458047135667672	609737423889733	515816444050369	-0.2459	0.4276	5743	0.5716	nonDE
105039956	XM_010916290,XM_019848100,XM_019848101,XM_019848102,XM_029262977,XR_002163904	LOC105039956	probable prefoldin subunit 3, transcript variant X1	protein_coding	XP_010914592.1		124	192	80	46	336912851241836	418785952610443	220719429462347	136365266817914	1013	1519	4683	0.1362	nonDE
105039957	XM_010916291,XM_019848733	LOC105039957	protein FAR1-RELATED SEQUENCE 5, transcript variant X1	protein_coding	XP_010914593.1		466	680	390	320	12661402312798	148320024882865	107600721862894	948627943081138	0.3511	0.8411	6.88	0.325	nonDE
105039960	XM_010916292,XM_010916293,XM_010916294,XM_010916295,XM_010916296,XM_010916298,XM_019848400,XM_019848401,XM_029262978,XM_029262979,XM_029262980,XM_029262981,XM_029262982	LOC105039960	galactokinase, transcript variant X1	protein_coding	XP_010914594.1		836	1448	552	503	227144470675948	315834405927043	152296406329019	149112454803066	0.7391	1932	7651	0.08428	nonDE
105039969	XM_010916312	LOC105039969	cell division cycle 5-like protein	protein_coding	XP_010914614.1	.	279	351	369	362	758053915294132	765593069615967	101806836839507	107313536061054	-0.5459	1398	6482	0.1588	nonDE
105039972	XM_010916320	LOC105039972	cell division cycle 5-like protein	protein_coding	XP_010914622.1	.	369	436	575	469	100258743635675	950993100719548	158642089926062	139033282907829	-0.6988	1.92	6914	0.08564	nonDE
105039973	XM_010916321,XR_002164049	LOC105039973	probable pre-mRNA-splicing factor ATP-dependent RNA helicase DEAH2, transcript variant X2	protein_coding	XP_010914623.1	.	750	1158	957	867	203777934218853	252580277668174	264035617494332	257018883328546	-0.2881	0.7197	7926	0.3803	nonDE
105039975	XM_010916324,XM_010916325	LOC105039975	importin subunit alpha-4, transcript variant X1	protein_coding	XP_010914626.1		676	956	446	443	183671844709259	208520505570617	123051081925258	131325680870295	0.5346	1473	7303	0.1447	nonDE
105039977	XM_010916327,XM_010916329,XM_019848764	LOC105039977	rhodanese-like domain-containing protein 6, transcript variant X1	protein_coding	XP_010914629.1		123	193	88	96	334195812118918	420967129446956	242791372408581	284588382924341	0.4433	0.6897	4979	0.398	nonDE
105039979	XM_010916331,XM_010916334,XM_019848404	LOC105039979	intermediate cleaving peptidase 55, mitochondrial, transcript variant X1	protein_coding	XP_010914633.1		196	191	131	75	532539668091935	416604775773931	361428065744593	222334674159642	0.6039	0.926	5197	0.2929	nonDE
105039980	XM_010916335,XM_010916336,XM_029262984	LOC105039980	uncharacterized LOC105039980, transcript variant X3	protein_coding	XP_010914637.1		235	307	292	215	638504193885738	669621288809407	805625917537566	637359399257639	-0.2252	0.4312	6.1	0.5694	nonDE
105039982	XM_010916339,XM_010916340	LOC105039982	DUF724 domain-containing protein 6, transcript variant X1	protein_coding	XP_010914641.1		86	232	108	128	233665364570951	506033026070952	297971229774168	379451177232455	0.02036	0.01699	5094	0.9796	nonDE
105039984	XM_010916342,XM_010916344,XM_010916345,XM_019848796,XR_831033	LOC105039984	beta-glucosidase-like SFR2, chloroplastic, transcript variant X2	protein_coding	XP_010914644.1		92	149	114	44	249967599308459	324995348640396	314525186983844	130436342173656	0.3845	0.3798	4595	0.6103	nonDE
105039986	XM_010916347	LOC105039986	neutral/alkaline invertase 1, mitochondrial	protein_coding	XP_010914649.1	.	701	972	711	865	190464442516554	212010388509037	196164392934661	25642599086412	-0.2448	0.5093	7731	0.5135	nonDE
105039994	XM_010916352	LOC105039994	transcription factor MYB78	protein_coding	XP_010914654.1	.	93	26	394	274	252684638431377	567105977493309	108704319010206	812262676263224	-3185	3166	5078	0.02519	downReg
105039996	XM_010916354	LOC105039996	T-complex protein 1 subunit beta	protein_coding	XP_010914656.1	.	3542	4450	2968	3064	962375257337568	970623692248163	818869083305307	908311255500189	0.07377	0.1377	9835	0.8452	nonDE
105039997	XM_010916356,XM_029262989,XM_029262990,XM_029262991	LOC105039997	E3 ubiquitin-protein ligase UPL6, transcript variant X1	protein_coding	XP_010914658.1		1076	1760	1342	1249	292353409625981	38388712322624	370256842923087	370261344033857	-0.2353	0.5336	8461	0.4962	nonDE
105039998	XM_010916358,XR_831036	LOC105039998	nuclear export mediator factor NEMF, transcript variant X2	protein_coding	XP_010914660.1	.	1382	1605	2628	1471	375494806787272	350078882260292	725063325783809	43607240758511	-0.7215	1608	8819	0.1218	nonDE
105040000	XM_010916360,XM_010916361	LOC105040000	tetratricopeptide repeat protein 1, transcript variant X1	protein_coding	XP_010914662.1		285	557	142	181	77435615003164	121491549793759	391776987295666	536567680305268	1012	1909	6063	0.0872	nonDE
105040006	XM_010916371,XM_010916372	LOC105040006	ADP-ribosylation factor, transcript variant X2	protein_coding	XP_010914673.1		1584	2100	1029	845	430378997070217	458047135667672	283900366145944	250497066219863	0.6445	1963	8427	0.08185	nonDE
105040010	XM_010916376	LOC105040010	probable boron transporter 2	protein_coding	XP_010914678.1	.	219	248	171	382	59503156791905	540931855455156	471787780475766	113242460705311	-0.4485	0.5087	6012	0.5141	nonDE
105040012	XM_010916381,XM_029263000	LOC105040012	pyrrolidone-carboxylate peptidase, transcript variant X2	protein_coding	XP_010914683.1		144	182	149	130	391253633700197	396974184245316	411089937373621	385380101876712	-0.1084	0.1585	5312	0.8226	nonDE
105040020	XM_010916393	LOC105040020	dihydrolipoyl dehydrogenase 1, mitochondrial	protein_coding	XP_010914695.1	.	699	739	746	895	189921034691971	16118896821829	205820867973638	265319377830506	-0.5102	1.2	7661	0.2045	nonDE
105040024	XM_010916397	LOC105040024	protein MODIFIER OF SNC1 1	protein_coding	XP_010914699.1	.	639	919	901	643	173618799954462	200450151275519	248585257431968	190614927312866	-0.3128	0.7397	7656	0.3699	nonDE
105040026	XM_010916404,XM_010916405	LOC105040026	tRNA:m(4)X modification enzyme TRM13 homolog, transcript variant X1	protein_coding	XP_010914706.1		102	157	98	49	27713799053764	342444763332498	270381301091375	145258653784299	0.5335	0.6656	4635	0.4116	nonDE
105040027	XM_010916406,XM_019847059,XM_029263005,XM_029263006,XM_029263007	LOC105040027	importin beta-like SAD2, transcript variant X5	protein_coding	XP_010914708.1		131	189	93	92	355932125102263	412242422100905	256586336749978	272730533635827	0.4532	0.748	4999	0.3669	nonDE
105040031	XM_010916411,XM_019848620,XM_019848622,XM_019848623,XM_029263008	LOC105040031	protein GFS12, transcript variant X4	protein_coding	XP_010914713.2		298	436	392	208	809677658629574	950993100719548	10815252043655	616608163002739	0.01051	0.01226	6406	0.986	nonDE
105040050	XM_019848683	LOC105040050	vacuolar protein sorting-associated protein 51 homolog	protein_coding	XP_019704242.1	.	304	391	248	255	825979893367083	852840143076476	684230231333275	755937892142781	0.1336	0.2402	6282	0.7335	nonDE
105040073	XM_010916447	LOC105040073	clathrin interactor EPSIN 1	protein_coding	XP_010914749.1	.	474	701	430	359	128787654426315	152900496239542	118636693336011	106424197364415	0.2325	0.5077	6974	0.5147	nonDE
105040081	XM_010916452,XM_010916453,XM_019848332,XM_019848333,XM_029263009	LOC105040081	uncharacterized LOC105040081, transcript variant X5	protein_coding	XP_010914754.1		127	175	158	87	34506396861059	381705946389727	435920873188135	257908222025184	0.006238	0.006422	5.13	0.9922	nonDE
105040082	XM_010916454	LOC105040082	S-adenosylmethionine synthase	protein_coding	XP_010914756.1	.	10141	16471	8564	10764	275534937455118	359261636742011	236280149239442	319094724353918	0.1028	0.1555	11.52	0.8256	nonDE
105040085	XM_010916459	LOC105040085	ABC transporter G family member 41	protein_coding	XP_010914761.1	.	64	361	36	154	173890503866754	787404837981094	99323743258056	456527197607797	0.8866	0.4607	4.82	0.5459	nonDE
105040086	XM_029262211	LOC105040086	pleiotropic drug resistance protein 3	protein_coding	XP_029118044.1	.	444	537	630	269	120636537057561	117129196120733	173816550701598	797440364652581	-0.08892	0.09676	6888	0.8924	nonDE
105040088	XM_010916462,XM_019848366,XM_029263010	LOC105040088	pto-interacting protein 1, transcript variant X1	protein_coding	XP_010914764.1		558	534	692	522	151610783058826	11647484306978	19092230648493	154744933215111	-0.4721	1073	7241	0.2405	nonDE
105040089	XM_010916465,XM_010916466	LOC105040089	probable receptor-like protein kinase At5g18500, transcript variant X2	protein_coding	XP_010914767.1		626	1163	568	1125	170086649094669	25367086608643	156710794918266	333502011239462	-0.2161	0.2372	7769	0.7371	nonDE
105040093	XM_010916471	LOC105040093	uncharacterized LOC105040093	protein_coding	XP_010914773.2	.	192	214	275	253	521671511600263	466771843013723	758723038776817	750008967498524	-0.7091	1729	5934	0.1049	nonDE
105040095	XM_010916474	LOC105040095	probable RNA 3'-terminal phosphate cyclase-like protein	protein_coding	XP_010914776.1	.	124	163	114	94	336912851241836	355531824351574	314525186983844	278659458280084	0.1306	0.1727	5006	0.8038	nonDE
105040096	XM_010916475	LOC105040096	suppressor of mec-8 and unc-52 protein homolog 1	protein_coding	XP_010914777.1	.	690	1111	677	534	187475699481344	242328746536564	186783817182511	158302288001665	0.2206	0.4711	7582	0.5384	nonDE
105040098	XM_010916477	LOC105040098	CBL-interacting protein kinase 1	protein_coding	XP_010914779.1	.	964	1696	1217	1102	261922571449299	369927591472558	335769432069595	326683747898567	-0.1805	0.3604	8327	0.6273	nonDE
105040099	XM_010916478,XR_003800036	LOC105040099	anaphase-promoting complex subunit 4, transcript variant X1	protein_coding	XP_010914780.1	.	84	214	125	92	228231286325115	466771843013723	344874108534917	272730533635827	0.05396	0.04783	4.99	0.9459	nonDE
105040101	XM_010916480	LOC105040101	protein CHUP1, chloroplastic	protein_coding	XP_010914782.1	.	139	261	168	190	377668438085607	569287154329821	463510801870928	563247841204425	-0.2043	0.2964	5609	0.6811	nonDE
105040103	XM_010916485	LOC105040103	ATP-dependent 6-phosphofructokinase 3	protein_coding	XP_010914787.1	.	630	557	355	430	171173464743836	121491549793759	979442468239164	127471879851528	0.2704	0.4468	6.99	0.5565	nonDE
105040104	XM_010916482,XR_003800037	LOC105040104	protein transport protein SEC23, transcript variant X2	protein_coding	XP_010914784.1	.	793	862	880	842	2154612024474	188017443307397	242791372408581	249607727523224	-0.3834	1004	7799	0.2651	nonDE
105040105	XM_010916483,XR_002163686	LOC105040105	protein translocase subunit SECA1, chloroplastic, transcript variant X2	protein_coding	XP_010914785.1	.	289	360	275	235	785224306523312	785223661144581	758723038776817	69664864570021	0.01862	0.02874	6242	0.9655	nonDE
105040109	XM_010916489,XM_029263019	LOC105040109	guanosine deaminase, transcript variant X2	protein_coding	XP_010914791.1		141	125	124	217	383102516331443	272647104564091	342115115666638	643288323901896	-0.6428	0.8418	5288	0.325	nonDE
105040121	XM_010916509	LOC105040121	mitochondrial-processing peptidase subunit alpha	protein_coding	XP_010914811.1	.	1444	1913	1072	1030	392340449349364	417259128824884	295764035479545	305339619179241	0.3386	0.9277	8446	0.2924	nonDE
105040123	XM_010916510,XM_019848379	LOC105040123	mediator of RNA polymerase II transcription subunit 13, transcript variant X1	protein_coding	XP_010914812.1		689	940	1066	846	187203995569053	205030622632196	294108639758577	250793512452076	-0.5608	1.65	7851	0.115	nonDE
105040125	XM_010916513,XM_010916514,XM_010916515	LOC105040125	flap endonuclease 1, transcript variant X3	protein_coding	XP_010914815.1		373	630	350	361	101345559284843	137414140700302	965647503897767	107017089828841	0.1339	0.2283	6777	0.7466	nonDE
105040130	XM_010916519,XM_010916520	LOC105040130	nuclear pore complex protein NUP98A, transcript variant X1	protein_coding	XP_010914821.1		218	192	200	208	592314528796132	418785952610443	551798573655867	616608163002739	-0.3342	0.5634	5756	0.4752	nonDE
105040131	XM_010916521	LOC105040131	microtubule-associated protein 70-1	protein_coding	XP_010914823.1	.	191	365	88	94	518954472477345	796129545327145	242791372408581	278659458280084	1229	2108	5359	0.06971	nonDE
105040132	XM_010916525,XM_010916527,XM_010916528	LOC105040132	phytochrome A, transcript variant X3	protein_coding	XP_010914827.1		1206	1506	929	993	327674918223915	328485231578816	25631043746315	294371108587365	0.1665	0.3615	8.23	0.6263	nonDE
105040133	XM_029263027	LOC105040133	glutamate--tRNA ligase, cytoplasmic	protein_coding	XP_029118860.1	.	748	1246	645	500	203234526394269	271774633829486	177955040004017	148223116106428	0.4422	1077	7611	0.2389	nonDE
105040135	XM_010916534	LOC105040135	DEAD-box ATP-dependent RNA helicase 50	protein_coding	XP_010914836.1	.	113	182	88	71	307025420889738	396974184245316	242791372408581	210476824871127	0.5476	0.8434	4819	0.3243	nonDE
105040139	XM_010916539,XM_029263031,XR_831053	LOC105040139	glucose-1-phosphate adenylyltransferase large subunit 4, chloroplastic/amyloplastic, transcript variant X1	protein_coding	XP_010914841.1		130	166	140	74	353215085979345	362075354861112	386259001559107	219370211837513	0.1798	0.2108	5018	0.7644	nonDE
105040142	XM_010916542	LOC105040142	2-methoxy-6-polyprenyl-1,4-benzoquinol methylase, mitochondrial	protein_coding	XP_010914844.1	.	70	156	111	68	190192738604262	340263586495985	306248208379006	201583437904742	-0.02019	0.01676	4.66	0.9798	nonDE
105040167	gene-LOC105040167	LOC105040167	.	pseudogene	.	.	630	1019	844	659	171173464743836	222261919640647	232858998082776	195358067028272	-0.2164	0.4629	7673	0.5448	nonDE
105040172	XM_010916578	LOC105040172	uncharacterized protein At2g34160	protein_coding	XP_010914880.1	.	371	394	272	252	100802151460259	859383673586014	750446060171979	747044505176396	0.2175	0.4203	6386	0.5768	nonDE
105040174	XM_010916583	LOC105040174	F-box/kelch-repeat protein At1g55270	protein_coding	XP_010914885.1	.	111	82	168	194	301591342643902	178856500594044	463510801870928	57510569049294	-1289	2111	5.12	0.06943	nonDE
105040176	XM_010916587	LOC105040176	uncharacterized LOC105040176	protein_coding	XP_010914889.1	.	457	468	885	884	124168687917354	102079075948796	244170868842721	262058469276164	-1264	3295	7.4	0.02269	downReg
105040177	XM_010916588	LOC105040177	probable cellulose synthase A catalytic subunit 1 [UDP-forming]	protein_coding	XP_010914890.1	.	5615	9116	4930	7119	152561746751848	1988360804165	136018348406171	211040072712332	-0.05383	0.06897	10.75	0.9228	nonDE
105040178	XM_010916589	LOC105040178	ABC transporter C family member 3	protein_coding	XP_010914891.1	.	129	144	313	307	350498046856426	314089464457833	863564767771432	910089932893466	-1519	3377	5765	0.02109	downReg
105040179	XM_029263082	LOC105040179	ABC transporter C family member 3-like	protein_coding	XP_029118915.1	.	109	183	274	252	296157264398066	399155361081829	755964045908538	747044505176396	-1192	2672	5672	0.03935	downReg
105040185	XM_010916599	LOC105040185	NADH-cytochrome b5 reductase-like protein	protein_coding	XP_010914901.1	.	634	632	450	332	172260280393003	137850376067604	12415467907257	98420149094668	0.3786	0.8116	7.03	0.3371	nonDE
105040189	XM_010916608,XR_003800869	LOC105040189	mitogen-activated protein kinase kinase 1, transcript variant X2	protein_coding	XP_010914910.1	.	553	748	542	565	150252263497367	163152027371152	14953741346074	167492121200263	-0.103	0.1969	7.3	0.7778	nonDE
105040193	XM_010916614,XR_003800106	LOC105040193	monothiol glutaredoxin-S4, mitochondrial, transcript variant X2	protein_coding	XP_010914916.1	.	126	135	77	76	342346929487672	294458872929218	212442450857509	22529913648177	0.4286	0.6066	4727	0.4491	nonDE
105040194	XM_010916616,XM_019848922,XM_029263087	LOC105040194	CRC domain-containing protein TSO1, transcript variant X2	protein_coding	XP_010914918.1		110	188	106	159	298874303520984	410061245264392	292453244037609	47134950921844	-0.1291	0.1424	5177	0.8399	nonDE
105040196	XM_010916617	LOC105040196	acyl-protein thioesterase 2	protein_coding	XP_010914919.1	.	490	754	360	309	133134917022984	16446073347306	99323743258056	916018857537724	0.5465	1415	6894	0.1546	nonDE
105040198	XM_010916618,XM_010916619	LOC105040198	peptidyl-prolyl cis-trans isomerase CYP95, transcript variant X2	protein_coding	XP_010914920.1		652	830	640	598	177150950814256	181037677430556	176575543569877	177274846863288	-0.07288	0.1411	7477	0.8413	nonDE
105040203	XM_010916627	LOC105040203	GTP-binding nuclear protein Ran1B	protein_coding	XP_010914929.1	.	1668	2652	1214	1300	453202125702728	578448097043175	334941734209111	385380101876712	0.419	1.05	8745	0.2483	nonDE
105040207	XM_010916632,XM_010916633,XM_019849553	LOC105040207	probable 1-deoxy-D-xylulose-5-phosphate synthase, chloroplastic, transcript variant X3	protein_coding	XP_010914934.1		587	854	509	371	159490196515289	186272501838187	140432736995418	109981552150969	0.381	0.9141	7195	0.2975	nonDE
105040208	XM_010916634,XM_010916635,XM_019848805,XM_029263091	LOC105040208	protein FAR1-RELATED SEQUENCE 5, transcript variant X4	protein_coding	XP_010914936.1		269	418	327	224	730883524064951	911731917662319	902190667927342	664039560156796	-0.01268	0.01737	6315	0.9794	nonDE
105040209	XM_010916637	LOC105040209	26S proteasome regulatory subunit 8 homolog A	protein_coding	XP_010914939.2	.	833	989	554	554	226329358939072	215718389131109	152848204902675	164231212645922	0.3895	1026	7549	0.2566	nonDE
105040210	XM_010916638	LOC105040210	serine-threonine kinase receptor-associated protein	protein_coding	XP_010914940.1	.	335	573	302	334	910208106177542	124981432732179	833215846220359	990130415590937	0.1515	0.25	6623	0.7246	nonDE
105040211	XM_010916642	LOC105040211	derlin-1	protein_coding	XP_010914944.1	.	121	0	129	68	328761733873082	0	355910080008034	201583437904742	-4019	1.27	2838	0.1879	nonDE
105040225	XM_019849588	LOC105040225	6-hydroxynicotinate 3-monooxygenase	protein_coding	XP_019705147.1	.	117	152	88	35	31789357738141	331538879149934	242791372408581	103756181274499	0.9005	1115	4514	0.2288	nonDE
105040227	XM_010916652,XM_010916653	LOC105040227	protein FAR1-RELATED SEQUENCE 5, transcript variant X1	protein_coding	XP_010914954.1		200	318	228	279	543407824583607	693614234011047	629050373967688	827084987873867	-0.3114	0.5592	6059	0.4775	nonDE
105040228	XM_010916654,XM_010916655	LOC105040228	V-type proton ATPase subunit c''1, transcript variant X2	protein_coding	XP_010914956.1		197	255	124	139	535256707214853	556200093310745	342115115666638	412060262775869	0.4563	0.8848	5505	0.3068	nonDE
105040229	XM_010916657,XM_029263092,XM_029263093,XM_029263094,XM_029263095,XM_029263096,XM_029263097	LOC105040229	GDP-fucose transporter 1, transcript variant X1	protein_coding	XP_010914959.2		106	135	100	107	288006147029312	294458872929218	275899286827933	317197468467755	-0.1081	0.1311	4882	0.8544	nonDE
105040234	XM_010916662	LOC105040234	protein argonaute PNH1	protein_coding	XP_010914964.1	.	111	257	134	137	301591342643902	56056244698377	369705044349431	406131338131612	0.03915	0.03943	5324	0.9545	nonDE
105040236	XM_010916664	LOC105040236	uncharacterized LOC105040236	protein_coding	XP_010914966.1	.	122	247	67	159	331478772996	538750678618643	184852522174715	47134950921844	0.4952	0.4923	5148	0.5234	nonDE
105040239	XM_010916671,XM_010916672,XM_019848957	LOC105040239	ABC transporter G family member 36, transcript variant X1	protein_coding	XP_010914973.1		701	88	2802	3065	190464442516554	19194356161312	77306980169187	908607701732402	-3961	2819	7817	0.03369	downReg
105040240	XM_010916673	LOC105040240	ABC transporter G family member 39	protein_coding	XP_010914975.1	.	1396	1325	3961	3707	379298661559358	289005930837936	109283707512544	109892618281306	-1816	4262	9235	0.01447	downReg
105040241	XM_010916674	LOC105040241	probable protein phosphatase 2C 57	protein_coding	XP_010914976.1	.	116	208	113	108	315176538258492	453684781994647	311766194115565	320161930789884	0.1958	0.2596	5117	0.7151	nonDE
105040243	XM_010916677,XM_019849378	LOC105040243	transcriptional corepressor LEUNIG, transcript variant X1	protein_coding	XP_010914979.2		598	780	802	580	162478939550498	170131793247993	221271228036003	171938814683456	-0.323	0.7812	7494	0.3507	nonDE
105040248	XM_010916690,XM_029263106,XM_029263107,XM_029263108	LOC105040248	aromatic aminotransferase ISS1, transcript variant X1	protein_coding	XP_010914992.1		100	198	92	111	271703912291803	43187301362952	253827343881699	32905531775627	0.2047	0.2348	4982	0.74	nonDE
105040249	XM_010916692,XM_010916693,XM_010916694,XM_019849495,XM_029263109,XM_029263110,XM_029263111,XM_029263112,XM_029263113,XM_029263114,XM_029263115,XM_029263116,XM_029263117	LOC105040249	uncharacterized LOC105040249, transcript variant X9	protein_coding	XP_010914994.1		215	428	301	158	584163411427377	933543686027447	83045685335208	468385046896312	0.1522	0.1784	6088	0.7977	nonDE
105040251	XM_010916707,XM_029264532	LOC105040251	uncharacterized LOC105040251, transcript variant X1	protein_coding	XP_010915009.1		72	16	171	147	195626816850098	348988293842036	471787780475766	435775961352898	-2653	2406	4291	0.05126	nonDE
105040257	XM_010916712,XM_010916714	LOC105040257	palmitoyl-acyl carrier protein thioesterase, chloroplastic, transcript variant X2	protein_coding	XP_010915014.1		184	239	286	239	499935198616918	521301263926541	78907196032789	708506494988725	-0.6411	1591	5952	0.1248	nonDE
105040260	XM_010916719,XM_010916720,XM_029263125	LOC105040260	uncharacterized LOC105040260, transcript variant X1	protein_coding	XP_010915021.1		324	390	546	468	880320675825443	850658966239963	150641010608052	138736836675616	-0.8326	2315	6807	0.05657	nonDE
105040265	XM_010916721	LOC105040265	acyl transferase 9	protein_coding	XP_010915023.1	.	429	359	365	717	116560978373184	783042484308069	100703239692196	212551948496617	-0.7079	0.9488	6887	0.285	nonDE
105040266	XM_010916722	LOC105040266	syntaxin-32	protein_coding	XP_010915024.1	.	370	626	382	453	100530447547967	136541669965697	105393527568271	134290143192424	-0.1008	0.1543	6885	0.8267	nonDE
105040267	XM_010916724	LOC105040267	46 kDa FK506-binding nuclear protein	protein_coding	XP_010915026.1	.	255	291	328	343	692844976344099	634722459425203	904949660795622	101681057649009	-0.6243	1529	6.32	0.1354	nonDE
105040273	XM_029264521,XM_029264523,XM_029264525,XR_003800861	LOC105040273	probable glutamate carboxypeptidase LAMP1, transcript variant X4	protein_coding	XP_029120354.1		308	393	240	171	836848049858755	857202496749501	66215828838704	506923057083983	0.4508	1	6133	0.2659	nonDE
105040274	XM_010916732	LOC105040274	uncharacterized LOC105040274	protein_coding	XP_010915034.3	.	354	552	429	368	961831849512984	120400961375502	118360794049183	109092213454331	-0.1639	0.3165	6791	0.6634	nonDE
105040275	XM_010916733	LOC105040275	uncharacterized LOC105040275	protein_coding	XP_010915035.1	.	379	435	448	552	102975782758594	948811923883036	123602880498914	163638320181496	-0.6144	1422	6891	0.1533	nonDE
105040279	XM_010916738,XM_029263129,XM_029263130	LOC105040279	probable ADP-ribosylation factor GTPase-activating protein AGD14, transcript variant X1	protein_coding	XP_010915040.1		224	206	172	225	60861676353364	449322428321622	474546773344046	667004022478925	-0.2035	0.2816	5765	0.6945	nonDE
105040281	XM_010916740,XM_010916741,XM_019849502	LOC105040281	nuclear pore complex protein NUP50A, transcript variant X3	protein_coding	XP_010915042.1		168	261	191	132	45646257265023	569287154329821	526967637841353	391309026520969	0.07549	0.1033	5592	0.8859	nonDE
105040287	XM_010916752	LOC105040287	heat shock 70 kDa protein 14	protein_coding	XP_010915054.1	.	499	481	384	381	13558025223361	104914605836262	105945326141926	112946014473098	0.02648	0.03832	6837	0.9553	nonDE
105040289	XM_010916754,XM_019848977	LOC105040289	V-type proton ATPase subunit F, transcript variant X1	protein_coding	XP_010915056.1		130	128	74	120	353215085979345	279190635073629	204165472252671	355735478655427	0.1268	0.124	4869	0.8637	nonDE
105040293	XM_010916763,XR_003800119	LOC105040293	uncharacterized LOC105040293, transcript variant X1	protein_coding	XP_010915065.1	.	175	126	237	123	475481846510656	274828281400603	653881309782202	364628865621812	-0.589	0.7678	5397	0.3572	nonDE
105040294	XM_010916764	LOC105040294	protein GIGANTEA	protein_coding	XP_010915066.1	.	6049	5501	4207	4269	164353696545312	119986537776565	116070829968512	126552896531668	0.1245	0.2046	10.35	0.7699	nonDE
105040299	XM_010916768	LOC105040299	ATP synthase subunit d, mitochondrial	protein_coding	XP_010915070.1	.	136	131	51	52	369517320716853	285734165583167	140708636282246	154152040750685	1019	1427	4461	0.1522	nonDE
105040300	XM_010916769	LOC105040300	S-adenosylmethionine carrier 1, chloroplastic/mitochondrial	protein_coding	XP_010915071.1	.	179	236	114	141	486350003002328	514757733417003	314525186983844	417989187420126	0.387	0.6709	5417	0.409	nonDE
105040307	XM_010916779,XM_010916780	LOC105040307	DEAD-box ATP-dependent RNA helicase 39, transcript variant X1	protein_coding	XP_010915081.2		150	210	94	62	407555868437705	458047135667672	259345329618257	18379666397197	0.8808	1522	4948	0.1358	nonDE
105040308	XM_010916781	LOC105040308	polyadenylate-binding protein 3	protein_coding	XP_010915083.1	.	2987	3735	2951	2146	811579586015617	814669548437503	814178795429232	636173614328788	0.08696	0.1613	9.58	0.8187	nonDE
105040309	XM_010916782	LOC105040309	translation factor GUF1 homolog, mitochondrial	protein_coding	XP_010915084.1	.	298	445	318	273	809677658629574	970623692248163	877359732112828	809298213941096	-0.01412	0.02155	6436	0.9756	nonDE
105040310	XM_010916784,XM_010916785,XM_010916786,XM_010916788	LOC105040310	ubiquitin-conjugating enzyme E2 2, transcript variant X1	protein_coding	XP_010915086.1		560	615	410	448	15215419088341	134142375445533	113118707599453	132807912031359	0.1284	0.2303	7049	0.7448	nonDE
105040311	XM_010916789	LOC105040311	probable LRR receptor-like serine/threonine-protein kinase At1g14390	protein_coding	XP_010915091.1	.	57	113	167	202	154871230006328	246472982525938	460751809002649	598821389069968	-1463	2388	5008	0.05221	nonDE
105040312	XM_010916790,XM_010916791,XM_010916792,XM_010916793,XM_010916794,XM_019849381	LOC105040312	protein IQ-DOMAIN 31, transcript variant X1	protein_coding	XP_010915092.1		138	167	127	174	374951398962689	364256531697625	350392094271475	515816444050369	-0.2822	0.4116	5314	0.585	nonDE
105040318	XM_010916801,XM_010916804,XM_019849254,XM_019849255,XM_019849256,XM_019849257,XM_019849258,XM_019849259,XM_029263138,XM_029263140	LOC105040318	probable serine/threonine-protein kinase PIX7, transcript variant X8	protein_coding	XP_010915103.1		193	296	135	156	524388550723181	645628343607767	37246403721771	462456122252055	0.4117	0.7671	5623	0.3574	nonDE
105040320	XM_010916806,XM_010916807	LOC105040320	uncharacterized LOC105040320, transcript variant X1	protein_coding	XP_010915108.1		265	283	117	121	720015367573279	617273044733101	322802165588682	358699940977555	0.8776	1834	5578	0.09343	nonDE
105040321	XM_010916809	LOC105040321	phosducin-like protein 3	protein_coding	XP_010915111.1	.	348	524	319	169	945529614775476	114293666233267	880118724981108	500994132439726	0.55	1011	6379	0.2626	nonDE
105040322	XM_010916810,XM_029263142	LOC105040322	FACT complex subunit SSRP1-A, transcript variant X1	protein_coding	XP_010915112.1		247	378	162	144	671108663360755	82448484420181	446956844661252	426882574386512	0.6793	1.56	5836	0.1309	nonDE
105040326	gene-LOC105040326	LOC105040326	.	pseudogene	.	.	172	179	177	244	467330729141902	390430653735778	488341737685442	723328806599367	-0.5713	1008	5659	0.2635	nonDE
105040328	XM_010916818	LOC105040328	uncharacterized LOC105040328	protein_coding	XP_010915120.1	.	466	494	305	295	12661402312798	107750135723729	841492824825197	874516385027924	0.3488	0.7715	6647	0.3556	nonDE
105040349	XM_019849507,XR_002164364,XR_002164365	LOC105040349	type I inositol polyphosphate 5-phosphatase 1, transcript variant X1	protein_coding	XP_019705066.1	.	67	145	131	74	182041621235508	316270641294345	361428065744593	219370211837513	-0.2903	0.3017	4708	0.6767	nonDE
105040359	XM_010916839,XM_019849429	LOC105040359	glutamine--tRNA ligase, transcript variant X1	protein_coding	XP_010915141.1		86	112	215	152	233665364570951	244291805689425	593183466680057	45059827296354	-1207	2341	5141	0.05541	nonDE
105040362	XM_010916849	LOC105040362	uncharacterized LOC105040362	protein_coding	XP_010915151.1	.	150	149	208	129	407555868437705	324995348640396	573870516602102	382415639554584	-0.4883	0.8141	5372	0.3364	nonDE
105040368	XM_010916856	LOC105040368	histone deacetylase 1	protein_coding	XP_010915158.1	.	266	336	171	183	722732406696197	732875417068276	471787780475766	542496604949526	0.4368	0.9492	5926	0.2849	nonDE
105040371	XM_010916862	LOC105040371	protein KINESIN LIGHT CHAIN-RELATED 1	protein_coding	XP_010915164.1	.	537	639	589	482	145905000900698	139377199853163	162504679941653	142887083926596	-0.1896	0.4111	7205	0.5855	nonDE
105040379	XM_010916870	LOC105040379	serine/threonine-protein phosphatase PP2A-1 catalytic subunit	protein_coding	XP_010915172.1	.	287	424	243	315	779790228277476	924818978681396	670435266991878	933805631470495	0.01868	0.0245	6359	0.9721	nonDE
105040383	XM_010916873	LOC105040383	aminopeptidase M1	protein_coding	XP_010915175.1	.	2270	3117	1681	1425	616767880902394	679872819941017	463786701157756	422435880903319	0.4581	1325	9065	0.1757	nonDE
105040386	XM_010916888	LOC105040386	hexokinase-2	protein_coding	XP_010915190.1	.	138	100	75	105	374951398962689	218117683651273	20692446512095	311268543823498	0.04125	0.0338	4759	0.9602	nonDE
105040388	XM_010916891,XM_010916892	LOC105040388	mitogen-activated protein kinase kinase 2, transcript variant X1	protein_coding	XP_010915193.1		469	555	478	377	127429134864856	121055314426456	131879859103752	111760229544247	-0.06212	0.1074	6942	0.8812	nonDE
105040389	XM_010916894	LOC105040389	transcriptional elongation regulator MINIYO	protein_coding	XP_010915196.1	.	270	403	252	210	733600563187869	879014265114628	695266202806392	622537087646997	0.1985	0.3786	6186	0.6115	nonDE
105040391	XM_010916896,XM_029263155	LOC105040391	serine/threonine-protein kinase 38, transcript variant X1	protein_coding	XP_010915198.1		272	365	186	136	739034641433705	796129545327145	513172673499956	403166875809483	0.6556	1509	5888	0.1383	nonDE
105040392	XM_010916900	LOC105040392	elongation factor 2	protein_coding	XP_010915202.1	.	8442	7686	6694	6652	22937244275674	167645251654368	184686982602619	197196033667991	-0.04843	0.07131	10.92	0.9196	nonDE
105040393	XM_010916899	LOC105040393	protein ALP1-like	protein_coding	XP_010915201.2	.	3453	3697	9287	5843	938193609143597	806381076458755	256227667677102	173213533481971	-1363	3192	10.4	0.02519	downReg
105040399	XM_010916904	LOC105040399	(S)-coclaurine N-methyltransferase	protein_coding	XP_010915206.1	.	162	310	97	88	440160337912722	676164819318945	267622308223095	260872684347313	0.9686	1656	5252	0.1139	nonDE
105040400	XM_010916905	LOC105040400	uncharacterized LOC105040400	protein_coding	XP_010915207.1	.	309	361	338	349	839565088981673	787404837981094	932539589478415	103459735042287	-0.364	0.8218	6484	0.3333	nonDE
105040405	XM_010916911,XR_831108	LOC105040405	DEAD-box ATP-dependent RNA helicase 20, transcript variant X2	protein_coding	XP_010915213.1	.	337	366	184	218	915642184423378	798310722163658	507654687763398	646252786224025	0.4876	1011	6132	0.2626	nonDE
105040413	XM_010916918	LOC105040413	uncharacterized LOC105040413	protein_coding	XP_010915220.1	.	74	51	171	112	201060895095935	111240018662149	471787780475766	332019780078398	-1.56	2164	4613	0.06639	nonDE
105040414	XM_029263161,XM_029263162,XM_029263163	LOC105040414	nucleosome assembly protein 1				140	204	98	130	380385477208525	444960074648596	270381301091375	385380101876712	0.2825	0.4041	5193	0.5914	nonDE
105040419	XM_010916926,XM_010916927	LOC105040419	beta-galactosidase, transcript variant X1	protein_coding	XP_010915228.1		232	706	150	653	630353076516984	153991084657798	4138489302419	193579389634995	0.08858	0.04541	6556	0.9482	nonDE
105040426	XM_010916938,XM_019849545,XM_019849546	LOC105040426	ent-kaurene oxidase 2, transcript variant X2	protein_coding	XP_010915240.1		136	391	31	58	369517320716853	852840143076476	855287789166594	171938814683456	2166	1955	4716	0.08225	nonDE
105040429	XM_010916941,XM_010916942	LOC105040429	V-type proton ATPase subunit B 2, transcript variant X1	protein_coding	XP_010915243.1		1194	1177	813	728	324414471276413	256724513657548	22430612019111	215812857050959	0.3014	0.6884	7978	0.3988	nonDE
105040430	XM_010916944	LOC105040430	translation machinery-associated protein 22	protein_coding	XP_010915246.1	.	135	155	92	99	366800281593935	338082409659472	253827343881699	293481769890727	0.2718	0.3857	4961	0.6063	nonDE
105040431	XM_010916945	LOC105040431	transmembrane 9 superfamily member 7	protein_coding	XP_010915247.1	.	823	1209	623	651	223612319816154	263704279534389	171885255693803	192986497170569	0.3268	0.8083	7717	0.3385	nonDE
105040432	XM_010916947	LOC105040432	eukaryotic initiation factor 4A-8	protein_coding	XP_010915249.1	.	1725	1790	1162	1196	468689248703361	390430653735778	320594971294059	354549693726575	0.2541	0.5663	8569	0.4735	nonDE
105040436	XM_010916959	LOC105040436	lysM domain receptor-like kinase 3	protein_coding	XP_010915261.1	.	349	410	208	186	948246653898394	894282502970217	573870516602102	551389991915911	0.6163	1.53	6172	0.1354	nonDE
105040443	XM_010916965,XM_019849301	LOC105040443	receptor-like serine/threonine-protein kinase ALE2, transcript variant X1	protein_coding	XP_010915267.1		102	140	61	142	27713799053764	305364757111782	168298564965039	420953649742255	0.08241	0.06479	4806	0.9276	nonDE
105040445	XM_010916970,XM_010916973,XM_019849304,XM_019849306,XM_019849307,XM_029263173,XM_029263174,XM_029263175,XM_029263176,XM_029263177,XM_029263178,XM_029263179,XM_029263180	LOC105040445	calumenin, transcript variant X13	protein_coding	XP_010915272.1		360	380	495	444	978134084250492	828847197874836	136570146979827	131622127102508	-0.6699	1739	6781	0.1041	nonDE
105040447	XM_010916975	LOC105040447	protein indeterminate-domain 7	protein_coding	XP_010915277.1	.	185	211	280	212	502652237739836	460228312504185	772518003118214	628466012291254	-0.6338	1465	5859	0.1464	nonDE
105040448	XM_010916976,XM_019848818	LOC105040448	probable phospholipid-transporting ATPase 4, transcript variant X2	protein_coding	XP_010915278.1		294	261	165	141	798809502137902	569287154329821	45523382326609	417989187420126	0.5242	0.9686	5765	0.277	nonDE
105040452	XM_010916984,XM_010916985	LOC105040452	BTB/POZ domain and ankyrin repeat-containing protein NPR1, transcript variant X2	protein_coding	XP_010915286.1		167	304	147	87	453745533527312	663077758299869	405571951637062	257908222025184	0.6651	1084	5401	0.2369	nonDE
105040454	XM_019855054,XR_002166122,XR_003800841,XR_003800842	LOC105040454	MMS19 nucleotide excision repair protein homolog, transcript variant X4	protein_coding	XP_019710613.1	.	218	431	262	155	592314528796132	940087216536985	722856131489186	459491659929926	0.2824	0.4016	6038	0.5939	nonDE
105040460	XM_010916993,XM_010916994,XM_019849309,XM_029263187	LOC105040460	cysteine synthase, transcript variant X2	protein_coding	XP_010915295.1		169	206	139	82	459179611773148	449322428321622	383500008690827	243085910414542	0.4581	0.7381	5224	0.3708	nonDE
105040466	XM_010917000,XM_010917001,XM_010917002	LOC105040466	uncharacterized LOC105040466, transcript variant X1	protein_coding	XP_010915302.1		1655	2347	3057	2248	449669974842935	511922203529537	843424119832993	666411130014499	-0.7339	2088	9229	0.07138	nonDE
105040475	XM_010917014,XM_010917015,XM_010917016	LOC105040475	serine/threonine protein phosphatase 2A 55 kDa regulatory subunit B beta isoform, transcript variant X2	protein_coding	XP_010915316.1		321	370	315	324	872169558456689	807035429509709	86908275350799	960485792369652	-0.2151	0.4241	6454	0.5745	nonDE
105040482	XM_010917029	LOC105040482	mitochondrial carrier protein CoAc2	protein_coding	XP_010915331.1	.	131	114	184	137	355932125102263	248654159362451	507654687763398	406131338131612	-0.7447	1328	5205	0.1747	nonDE
105040484	gene-LOC105040484	LOC105040484	.	pseudogene	.	.	129	201	45	33	350498046856426	438416544139058	12415467907257	978272566302423	1733	2424	4389	0.05045	nonDE
105040486	XM_010917036	LOC105040486	ABC transporter C family member 8	protein_coding	XP_010915338.1	.	585	969	753	386	158946788690705	211356035458083	207752162981434	114428245634162	0.1575	0.2159	7394	0.7586	nonDE
105040491	XM_010917043	LOC105040491	40S ribosomal protein S24-1	protein_coding	XP_010915345.1	.	290	230	111	134	78794134564623	501670672397927	306248208379006	397237951165226	0.7541	1192	5554	0.2061	nonDE
105040492	XM_029263197	LOC105040492	probable inositol oxygenase	protein_coding	XP_029119030.1	.	244	180	924	576	662957545992001	392611830572291	254930941029011	170753029754605	-2151	3.73	6691	0.01622	downReg
105040499	XM_010917048	LOC105040499	DNA mismatch repair protein MSH5	protein_coding	XP_010915350.1	.	64	194	149	89	173890503866754	423148306283469	411089937373621	263837146669441	-0.3027	0.2809	4909	0.6949	nonDE
105040501	XM_010917050,XR_003800148	LOC105040501	ATP-dependent 6-phosphofructokinase 3, transcript variant X1	protein_coding	XP_010915352.1	.	906	1052	1113	1030	246163744536374	229459803201139	30707590623949	305339619179241	-0.4564	1312	8076	0.1782	nonDE
105040502	XM_010917055,XM_010917062,XM_029264467	LOC105040502	NADP-dependent malic enzyme, transcript variant X3	protein_coding	XP_010915357.1		1462	1699	1070	1137	397231119770617	370581944523512	295212236905889	337059366026017	0.1925	0.4238	8443	0.5745	nonDE
105040506	XM_010917060,XM_010917061	LOC105040506	deSI-like protein At4g17486, transcript variant X1	protein_coding	XP_010915362.1		220	413	175	193	597748607041968	900826033479756	482823751948884	572141228170811	0.4039	0.7161	5.96	0.3824	nonDE
105040517	XM_010917072,XM_010917073,XM_010917074,XM_029263203,XM_029263204	LOC105040517	nuclear poly(A) polymerase 4, transcript variant X1	protein_coding	XP_010915374.1		606	589	839	596	164652570848833	1284713156706	231479501648636	176681954398862	-0.5763	1357	7423	0.1675	nonDE
105040520	XM_010917077	LOC105040520	hexokinase-2	protein_coding	XP_010915379.1	.	533	284	1573	1105	144818185251531	619454221569614	433989578180339	327573086595205	-2108	3204	7563	0.02519	downReg
105040525	XM_010917081,XM_010917082	LOC105040525	auxin-responsive protein IAA16, transcript variant X2	protein_coding	XP_010915383.1		90	74	302	149	244533521062623	161407085901942	833215846220359	441704885997155	-1752	2386	5124	0.05221	nonDE
105040527	XM_010917084,XM_010917085,XM_010917086,XM_010917087,XM_010917088,XM_010917089,XM_019849536,XM_019849537,XM_029263206,XM_029263208,XM_029263209	LOC105040527	uncharacterized protein C3F10.06c, transcript variant X4	protein_coding	XP_010915386.1		178	154	148	120	48363296387941	33590123282296	408330944505342	355735478655427	-0.04333	0.04919	5297	0.9443	nonDE
105040528	XM_010917090,XM_010917095,XR_003800834,XR_003800835,XR_003800836,XR_003800837	LOC105040528	uncharacterized LOC105040528, transcript variant X3	protein_coding	XP_010915392.1		547	858	513	393	148622040023617	187144972572792	14153633414273	116503369259652	0.2891	0.6399	7195	0.4279	nonDE
105040530	XM_010917092	LOC105040530	NADP-dependent malic enzyme	protein_coding	XP_010915394.1	.	1025	450	1225	2699	278496510099099	981529576430727	337976626364218	800108380742497	-1773	1886	8197	0.08869	nonDE
105040536	XM_010917099	LOC105040536	ABC transporter G family member 42	protein_coding	XP_010915401.1	.	1919	1314	5210	5360	521399807687971	286606636317772	143743528437353	158895180466091	-2055	3666	9578	0.01649	downReg
105040538	XM_010917102	LOC105040538	casein kinase 1-like protein HD16	protein_coding	XP_010915404.1	.	925	1158	1341	1184	251326118869918	252580277668174	369980943636259	350992338940021	-0.6065	1866	8236	0.09074	nonDE
105040544	XM_010917107,XM_010917108,XM_029263216,XR_002164291	LOC105040544	homeobox-leucine zipper protein ATHB-15, transcript variant X1	protein_coding	XP_010915409.1		453	950	558	442	123081872268187	207211799468709	153951802049987	131029234638082	0.08989	0.1248	7236	0.8632	nonDE
105040545	XM_010917111,XM_010917112,XM_019849365,XR_003800170,XR_003800171,XR_831161,XR_831162,XR_831163	LOC105040545	phosphoribosylaminoimidazole carboxylase, chloroplastic, transcript variant X8	protein_coding	XP_010915413.1		216	318	211	142	586880450550295	693614234011047	58214749520694	420953649742255	0.2706	0.4778	5816	0.5331	nonDE
105040552	XM_010917122	LOC105040552	putative ABC transporter B family member 8	protein_coding	XP_010915424.2	.	203	64	514	709	551558941952361	139595317536814	141812233429558	210180378638915	-2857	3.06	6117	0.0265	downReg
105040554	XM_010917119,XM_010917120,XM_010917121,XM_010917123	LOC105040554	probable serine/threonine-protein kinase At1g54610, transcript variant X2	protein_coding	XP_010915421.1		207	210	166	156	562427098444033	458047135667672	45799281613437	462456122252055	0.03971	0.05313	5599	0.9405	nonDE
105040568	XM_010917149	LOC105040568	serine/threonine-protein phosphatase 5	protein_coding	XP_010915451.1	.	433	571	300	390	117647794022351	124545197364877	8276978604838	115614030563014	0.2209	0.392	6768	0.6012	nonDE
105040572	XM_010917154	LOC105040572	ras-related protein RABB1c	protein_coding	XP_010915456.3	.	262	468	68	82	711864250204525	102079075948796	187611515042995	243085910414542	1.92	3104	5421	0.02546	upReg
105040575	XM_010917157	LOC105040575	citrate synthase, glyoxysomal	protein_coding	XP_010915459.1	.	143	188	118	140	388536594577279	410061245264392	325561158456961	415024725097998	0.04042	0.04963	5264	0.9438	nonDE
105040578	XM_010917160,XM_010917162,XM_029263231,XM_029263232,XR_003800175,XR_003800176,XR_831178	LOC105040578	lateral signaling target protein 2 homolog, transcript variant X3	protein_coding	XP_010915462.1		249	255	304	317	676542741606591	556200093310745	838733831956918	939734556114752	-0.6296	1451	6208	0.1484	nonDE
105040581	XM_010917170	LOC105040581	uncharacterized LOC105040581	protein_coding	XP_010915472.1	.	135	246	46	58	366800281593935	536569501782131	126913671940849	171938814683456	1.52	2147	4687	0.06735	nonDE
105040583	XM_010917172	LOC105040583	shaggy-related protein kinase eta	protein_coding	XP_010915474.1	.	243	360	103	166	660240506869082	785223661144581	284176265432771	49210074547334	0.8801	1563	5701	0.1302	nonDE
105040587	XM_010917176	LOC105040587	60S ribosomal protein L11	protein_coding	XP_010915478.1	.	380	596	202	203	103247486670885	129998139456158	557316559392426	601785851392097	0.9163	2277	6359	0.05831	nonDE
105040589	XM_010917178	LOC105040589	ras-related protein RIC2	protein_coding	XP_010915480.1	.	331	526	259	237	899339949685869	114729901600569	714579152884348	702577570344468	0.4347	1	6409	0.2659	nonDE
105040592	XM_010917182,XM_010917183,XM_019849644,XR_831187,XR_831188,XR_831191	LOC105040592	probable sugar phosphate/phosphate translocator At1g06470, transcript variant X1	protein_coding	XP_010915484.1		713	718	1207	1222	193724889464056	156608496861614	333010439201316	362257295764109	-1092	2925	7943	0.03039	downReg
105040601	XM_010917194	LOC105040601	mitochondrial dicarboxylate/tricarboxylate transporter DTC	protein_coding	XP_010915496.1	.	192	90	95	96	521671511600263	196305915286145	262104322486537	284588382924341	0.04389	0.02977	4892	0.9644	nonDE
105040608	XM_019855523	LOC105040608	ABC transporter G family member 42	protein_coding	XP_019711082.1	.	404	367	45	87	109768380565889	80049189900017	12415467907257	257908222025184	2.31	3025	5363	0.02696	upReg
105040610	XM_010917204	LOC105040610	low-temperature-induced cysteine proteinase	protein_coding	XP_010915506.1	.	296	528	108	316	804243580383738	115166136967872	297971229774168	936770093792623	0.811	0.8742	6159	0.3106	nonDE
105040611	XM_010917206,XM_010917207	LOC105040611	probable serine/threonine-protein kinase SIS8, transcript variant X1	protein_coding	XP_010915508.1		295	283	305	213	80152654126082	617273044733101	841492824825197	631430474613382	-0.1531	0.2349	6165	0.7399	nonDE
105040614	XM_010917209,XM_010917212	LOC105040614	SCAR-like protein 2, transcript variant X1	protein_coding	XP_010915511.1		217	416	142	313	589597489673214	907369563989294	391776987295666	927876706826238	0.2151	0.2052	6056	0.7698	nonDE
105040615	XM_019845762,XM_029264428,XM_029264429,XM_029264435	LOC105040615	kinesin-like protein KIN-14C, transcript variant X2	protein_coding	XP_019701321.1		554	675	307	540	150523967409659	147229436464609	847010810561756	160080965394942	0.2708	0.3759	7042	0.6135	nonDE
105040616	XM_010917213	LOC105040616	phosphoenolpyruvate carboxylase, housekeeping isozyme	protein_coding	XP_010915515.1	.	2519	3973	1847	2561	684422155063053	866581557146506	509585982771193	759198800697123	0.2144	0.3566	9435	0.6298	nonDE
105040617	XM_010917214	LOC105040617	dol-P-Man:Man(6)GlcNAc(2)-PP-Dol alpha-1,2-mannosyltransferase	protein_coding	XP_010915516.1	.	255	400	277	207	692844976344099	87247073460509	764241024513376	613643700680611	0.09361	0.1481	6192	0.8334	nonDE
105040619	XM_010917220,XM_010917221,XM_019848958	LOC105040619	putative lipase YDR444W, transcript variant X1	protein_coding	XP_010915522.1		162	155	99	50	440160337912722	338082409659472	273140293959654	148223116106428	0.7954	1078	4808	0.2389	nonDE
105040620	XM_010917224,XM_010917225	LOC105040620	14-3-3-like protein D, transcript variant X1	protein_coding	XP_010915526.1		282	293	248	306	766205032662886	639084813098229	684230231333275	907125470571338	-0.2635	0.4527	6217	0.5523	nonDE
105040621	XM_010917226,XM_010917227,XM_019849460	LOC105040621	polyadenylate-binding protein-interacting protein 9, transcript variant X1	protein_coding	XP_010915528.1		108	236	108	120	293440225275148	514757733417003	297971229774168	355735478655427	0.2124	0.2456	5158	0.7286	nonDE
105040625	XM_029263242	LOC105040625	mitogen-activated protein kinase 1	protein_coding	XP_029119075.1	.	330	454	478	526	896622910562951	990254283776777	131879859103752	155930718143962	-0.6914	1799	6863	0.0974	nonDE
105040627	XM_019854237,XM_029264409,XM_029264411,XM_029264413,XM_029264414,XM_029264415,XM_029264416	LOC105040627	casein kinase 1-like protein HD16, transcript variant X7	protein_coding	XP_019709796.1		657	618	614	522	178509470375715	134796728496486	169402162112351	154744933215111	-0.1616	0.2922	7309	0.6839	nonDE
105040636	XM_019849252	LOC105040636	ubiquitin carboxyl-terminal hydrolase 15	protein_coding	XP_019704811.1	.	79	227	39	133	214646090710525	495127141888389	107600721862894	394273488843098	0.6972	0.5075	4705	0.5148	nonDE
105040639	XM_010917259,XM_029263245,XM_029263247	LOC105040639	potassium channel KAT2, transcript variant X1	protein_coding	XP_010915561.1		727	40	276	377	197528744236141	87247073460509	761482031645096	111760229544247	-1439	0.6278	5957	0.4357	nonDE
105040640	XM_010917261	LOC105040640	mannosyl-oligosaccharide 1,2-alpha-mannosidase MNS3	protein_coding	XP_010915563.1	.	275	428	323	384	74718575880246	933543686027447	891154696454225	113835353169737	-0.3526	0.7036	6521	0.3901	nonDE
105040641	XM_010917263,XM_010917264	LOC105040641	prefoldin subunit 6, transcript variant X1	protein_coding	XP_010915565.1		196	298	118	108	532539668091935	649990697280792	325561158456961	320161930789884	0.7791	1622	5.45	0.1196	nonDE
105040642	XM_010917265,XM_010917266,XR_003800190	LOC105040642	phospho-N-acetylmuramoyl-pentapeptide-transferase homolog, transcript variant X3	protein_coding	XP_010915567.1		154	164	96	93	418424024929377	357713001188087	264863315354816	275694995957956	0.4127	0.6505	5021	0.4216	nonDE
105040645	XM_019849457,XM_019849458	LOC105040645	putative callose synthase 8, transcript variant X1	protein_coding	XP_019705016.1		443	562	191	209	120364833145269	122582138212015	526967637841353	619572625324868	0.9993	2.53	6383	0.04565	upReg
105040647	XM_010917275,XR_002164303,XR_002164304	LOC105040647	probable pre-mRNA-splicing factor ATP-dependent RNA helicase DEAH9, transcript variant X3	protein_coding	XP_010915577.1	.	484	658	579	550	131504693549233	143521435842537	159745687073373	163045427717071	-0.3206	0.8075	7219	0.3389	nonDE
105040648	XM_010917276	LOC105040648	sodium/calcium exchanger NCL1	protein_coding	XP_010915578.1	.	500	490	349	458	135851956145902	106877664989124	962888511029488	135772374353488	-0.01817	0.0229	6877	0.9741	nonDE
105040659	XM_010917295,XM_010917296,XM_010917299,XR_003800192	LOC105040659	transcription factor GTE4, transcript variant X1	protein_coding	XP_010915597.1		63	100	113	127	171173464743836	218117683651273	311766194115565	376486714910326	-0.8841	1434	4693	0.1511	nonDE
105040661	XM_010917303	LOC105040661	malate dehydrogenase, mitochondrial	protein_coding	XP_010915605.1	.	301	341	277	307	817828775998328	743781301250839	764241024513376	910089932893466	-0.1882	0.3402	6336	0.6414	nonDE
105040663	XM_010917305	LOC105040663	GDSL esterase/lipase At5g45910	protein_coding	XP_010915607.2	.	142	125	184	224	385819555454361	272647104564091	507654687763398	664039560156796	-0.9592	1.77	5444	0.1011	nonDE
105040664	XM_010917306	LOC105040664	GDSL esterase/lipase At5g45910	protein_coding	XP_010915608.1	.	34	204	0	196	923793301792132	444960074648596	0	581034615137197	3046	0.7421	2929	0.3692	nonDE
105040672	XM_010917328,XR_002166328,XR_002166330,XR_002166331,XR_002166332,XR_002166333,XR_003800814,XR_003800818	LOC105040672	golgin-84, transcript variant X3	protein_coding	XP_010915630.1	.	301	443	328	271	817828775998328	966261338575138	904949660795622	803369289296838	-0.02792	0.04361	6446	0.9505	nonDE
105040675	XM_010917355,XM_010917427,XM_010917579,XM_019854038	LOC105040675	transcriptional corepressor LEUNIG, transcript variant X1	protein_coding	XP_010915657.1		645	840	836	604	175249023428213	183218854267069	230651803788152	179053524256565	-0.2741	0.6409	7577	0.4276	nonDE
105040679	XM_010917327	LOC105040679	protein DJ-1 homolog B	protein_coding	XP_010915629.1	.	522	631	327	182	141829442216321	137632258383953	902190667927342	539532142627397	0.9001	1955	6628	0.08225	nonDE
105040684	XM_010917332	LOC105040684	CTP synthase	protein_coding	XP_010915634.1	.	220	443	154	93	597748607041968	966261338575138	424884901715018	275694995957956	1.05	1779	5677	0.09954	nonDE
105040690	XM_010917342,XR_831212	LOC105040690	isocitrate dehydrogenase [NADP], transcript variant X1	protein_coding	XP_010915644.1	.	439	593	497	346	119278017496102	129343786405205	137121945553483	102570396345648	-0.02613	0.04033	6925	0.9537	nonDE
105040691	XM_010917345,XM_029263251	LOC105040691	histone-lysine N-methyltransferase ATX4, transcript variant X2	protein_coding	XP_010915647.1		316	309	319	348	858584362842099	673983642482432	880118724981108	103163288810074	-0.4198	0.8578	6414	0.3178	nonDE
105040694	XM_010917348,XM_010917349	LOC105040694	uncharacterized LOC105040694, transcript variant X2	protein_coding	XP_010915650.1		157	186	103	97	426575142298131	405698891591367	284176265432771	28755284524647	0.4442	0.769	5114	0.3568	nonDE
105040700	XM_010917352,XM_029263254	LOC105040700	long chain acyl-CoA synthetase 4, transcript variant X1	protein_coding	XP_010915654.1		296	785	525	451	804243580383738	171222381666249	144847125584665	133697250727998	-0.3152	0.4297	6999	0.5702	nonDE
105040702	XM_010917354	LOC105040702	putative adenylate cyclase regulatory protein	protein_coding	XP_010915656.1	.	99	158	108	52	268986873168885	344625940169011	297971229774168	154152040750685	0.4061	0.4687	4683	0.5405	nonDE
105040703	XM_019849276,XM_019849277,XM_019849278,XM_029263255,XM_029263256,XM_029263257,XR_002164274,XR_002164275	LOC105040703	spermine synthase, transcript variant X6	protein_coding	XP_019704835.1		209	524	98	72	567861176689869	114293666233267	270381301091375	213441287193256	1657	2224	5465	0.06161	nonDE
105040706	XM_010917361	LOC105040706	cyclic nucleotide-gated ion channel 1	protein_coding	XP_010915663.1	.	404	501	794	554	109768380565889	109276959509288	219064033741379	164231212645922	-0.8865	2348	7173	0.05464	nonDE
105040707	XM_010917362,XM_010917363,XM_010917364,XM_019849563	LOC105040707	uncharacterized LOC105040707, transcript variant X4	protein_coding	XP_010915664.1		325	282	363	362	883037714948361	615091867896589	10015144111854	107313536061054	-0.5906	1229	6452	0.1982	nonDE
105040709	XM_010917366	LOC105040709	abscisic acid receptor PYL8	protein_coding	XP_010915668.1	.	202	136	413	263	548841902829443	296640049765731	113946405459937	77965359071981	-1362	2.29	5.95	0.05768	nonDE
105040718	XM_010917374	LOC105040718	bidirectional sugar transporter SWEET3b	protein_coding	XP_010915676.1	.	75	173	115	75	203777934218853	377343592716702	317284179852123	222334674159642	0.01406	0.01187	4.77	0.9863	nonDE
105040742	XM_010917409,XM_019849245,XM_019849246	LOC105040742	ubiquitin-conjugating enzyme E2 10, transcript variant X3	protein_coding	XP_010915711.1		2677	5386	3692	2686	727351373205158	117478184414575	101862016696873	79625457972373	-0.05593	0.07695	9834	0.9126	nonDE
105040746	XM_010917420,XM_010917421	LOC105040746	uncharacterized LOC105040746, transcript variant X1	protein_coding	XP_010915722.1		205	241	173	161	556993020198197	525663617599567	477305766212325	477278433862697	0.08658	0.1336	5671	0.8516	nonDE
105040747	XM_010917422	LOC105040747	ABC transporter C family member 10	protein_coding	XP_010915724.1	.	343	400	298	401	931944419160886	87247073460509	822179874747242	118874939117355	-0.2217	0.366	6563	0.622	nonDE
105040749	XM_010917423	LOC105040749	ABC transporter C family member 10	protein_coding	XP_010915725.1	.	258	252	208	315	700996093712853	549656562801207	573870516602102	933805631470495	-0.3303	0.4833	6078	0.5287	nonDE
105040753	XM_010917426,XM_029263263,XM_029263264,XM_029263265	LOC105040753	BTB/POZ domain-containing protein POB1, transcript variant X4	protein_coding	XP_010915728.1		138	333	245	149	374951398962689	726331886558738	675953252728437	441704885997155	-0.1373	0.1477	5743	0.834	nonDE
105040769	XM_010917452	LOC105040769	uncharacterized LOC105040769	protein_coding	XP_010915754.3	.	114	72	153	119	309742460012656	157044732228916	422125908846738	352771016333298	-0.9718	1391	4873	0.1603	nonDE
105040771	XM_010917454,XM_010917455,XM_010917456,XM_029263270	LOC105040771	S-type anion channel SLAH2, transcript variant X1	protein_coding	XP_010915756.1		205	254	103	64	556993020198197	554018916474232	284176265432771	189725588616228	1145	2089	5173	0.07132	nonDE
105040772	XM_010917458	LOC105040772	post-GPI attachment to proteins factor 3	protein_coding	XP_010915760.1	.	273	594	307	251	741751680556623	129561904088856	847010810561756	744080042854267	0.2278	0.3374	6465	0.6447	nonDE
105040773	XM_010917461,XM_010917469	LOC105040773	ultraviolet-B receptor UVR8, transcript variant X1	protein_coding	XP_010915763.1		393	541	307	292	106779637530679	118001666855338	847010810561756	865622998061538	0.3019	0.6914	6617	0.3967	nonDE
105040778	XM_010917463	LOC105040778	reticulon-like protein B2	protein_coding	XP_010915765.1	.	959	1419	716	870	26056405188784	309508993101156	1975438893688	257908222025184	0.2434	0.5	7985	0.5193	nonDE
105040784	XM_010917470	LOC105040784	uncharacterized LOC105040784	protein_coding	XP_010915772.1	.	195	231	280	269	529822628969017	50385184923444	772518003118214	797440364652581	-0.6963	1732	5996	0.1047	nonDE
105040786	XM_019849476	LOC105040786	serine/threonine-protein phosphatase PP1	protein_coding	XP_019705035.1	.	389	543	477	491	105692821881512	118437902222641	131603959816924	145555100016512	-0.393	0.97	6961	0.2769	nonDE
105040790	XM_029263277	LOC105040790	protein SGT1 homolog	protein_coding	XP_029119110.1	.	139	202	55	45	377668438085607	440597720975571	151744607755363	133400804495785	1423	2238	4.6	0.0609	nonDE
105040791	XM_010917484,XR_003800227	LOC105040791	uncharacterized LOC105040791, transcript variant X2	protein_coding	XP_010915786.1	.	422	704	499	468	114659050987141	153554849290496	137673744127139	138736836675616	-0.1414	0.2613	7083	0.7133	nonDE
105040795	XM_010917490,XM_010917491	LOC105040795	GTPase Der, transcript variant X2	protein_coding	XP_010915792.1		70	136	92	127	190192738604262	296640049765731	253827343881699	376486714910326	-0.4107	0.4961	4767	0.5216	nonDE
105040797	XM_010917494	LOC105040797	mitochondrial arginine transporter BAC2	protein_coding	XP_010915796.1	.	115	192	62	119	312459499135574	418785952610443	171057557833319	352771016333298	0.5183	0.6113	4905	0.4458	nonDE
105040799	XM_019849363,XM_029263281,XM_029263282	LOC105040799	helicase and polymerase-containing protein TEBICHI, transcript variant X3	protein_coding	XP_019704922.1		192	258	301	279	521671511600263	562743623820283	83045685335208	827084987873867	-0.7009	1792	6069	0.09814	nonDE
105040808	XM_010917504	LOC105040808	probable chlorophyll(ide) b reductase NYC1, chloroplastic	protein_coding	XP_010915806.1	.	211	226	195	136	573295254935705	492945965051876	53800360931447	403166875809483	0.083	0.1153	5641	0.8731	nonDE
105040811	XM_010917507	LOC105040811	ras-related protein Rab7	protein_coding	XP_010915809.1	.	107	212	79	78	29072318615223	462409489340698	217960436594067	231228061126027	0.6526	0.9277	4.85	0.2924	nonDE
105040812	XM_010917508	LOC105040812	subtilisin-like protease SBT6.1	protein_coding	XP_010915810.1	.	220	266	154	155	597748607041968	580193038512385	424884901715018	459491659929926	0.3241	0.6317	5677	0.4328	nonDE
105040817	XM_010917513,XM_010917514,XM_010917515,XM_010917517,XM_019848941,XM_029263288,XM_029263289,XM_029263290	LOC105040817	pentatricopeptide repeat-containing protein At5g25630, transcript variant X3	protein_coding	XP_010915815.1		115	225	98	55	312459499135574	490764788215363	270381301091375	163045427717071	0.8145	1107	4849	0.2306	nonDE
105040821	XM_010917523,XM_010917524	LOC105040821	protein disulfide isomerase-like 1-5, transcript variant X1	protein_coding	XP_010915825.1		147	161	109	103	399404751068951	351169470678549	300730222642447	305339619179241	0.2018	0.2851	5.08	0.6915	nonDE
105040822	XM_010917525	LOC105040822	uncharacterized LOC105040822	protein_coding	XP_010915827.1	.	380	1019	301	419	103247486670885	222261919640647	83045685335208	124210971297186	0.5108	0.6635	6956	0.4126	nonDE
105040823	XM_010917526,XM_019849239	LOC105040823	protein LIKE COV 1, transcript variant X1	protein_coding	XP_010915828.1		332	491	327	238	902056988808787	107095782672775	902190667927342	705542032666596	0.2115	0.4036	6471	0.592	nonDE
105040824	XM_010917527	LOC105040824	coiled-coil domain-containing protein 25	protein_coding	XP_010915829.1	.	114	137	91	124	309742460012656	298821226602243	251068351013419	367593327943941	-0.07867	0.08527	4932	0.9044	nonDE
105040832	XM_010917535,XM_010917536,XM_010917537,XM_010917538,XM_010917539	LOC105040832	TOM1-like protein 9, transcript variant X2	protein_coding	XP_010915837.1		282	439	352	421	766205032662886	957536631229087	971165489634326	124803863761612	-0.4438	0.9395	6604	0.2875	nonDE
105040836	XM_010917545,XM_010917547,XM_010917548,XM_010917549,XM_019849298	LOC105040836	protein PEROXIN-4, transcript variant X3	protein_coding	XP_010915847.1		490	810	351	558	133134917022984	176675323757531	968406496766046	165416997574773	0.2008	0.2773	7124	0.6978	nonDE
105040837	XM_010917550	LOC105040837	peroxisomal fatty acid beta-oxidation multifunctional protein	protein_coding	XP_010915852.1	.	1615	2629	1558	1772	438801818351263	573431390319196	42985108887792	52530272348118	-0.01427	0.02162	8932	0.9756	nonDE
105040839	XM_010917552,XM_010917553,XM_010917554,XM_019849477,XM_019849478,XR_003800244	LOC105040839	probable plastidic glucose transporter 2, transcript variant X6	protein_coding	XP_010915854.1		153	138	14	36	415706985806459	301002403438756	386259001559107	106720643596628	2337	2268	3934	0.05868	nonDE
105040845	XM_010917561,XM_019848895	LOC105040845	putative E3 ubiquitin-protein ligase LIN-1, transcript variant X2	protein_coding	XP_010915863.1		423	259	495	348	114930754899433	564924800656796	136570146979827	103163288810074	-0.6702	1003	6614	0.2655	nonDE
105040848	XM_010917571	LOC105040848	chaperone protein ClpB1	protein_coding	XP_010915873.1	.	242	268	20	21	657523467746164	58455539218541	551798573655867	622537087646996	3.28	3685	4271	0.01622	upReg
105040855	XM_010917580	LOC105040855	eukaryotic translation initiation factor 2 subunit alpha homolog	protein_coding	XP_010915882.1	.	694	843	790	839	188562515130512	183873207318023	217960436594067	248718388826586	-0.4126	1095	7703	0.2344	nonDE
105040856	XM_010917591,XM_029264360,XR_003800764	LOC105040856	vesicle-fusing ATPase, transcript variant X1	protein_coding	XP_010915893.1		498	592	249	479	135308548321318	129125668721553	686989224201554	141997745229958	0.3351	0.4412	6838	0.5609	nonDE
105040857	XM_010917581	LOC105040857	auxin-responsive protein IAA17	protein_coding	XP_010915883.1	.	1705	3352	1230	1566	463255170457525	731130475599066	339356122798358	464234799645332	0.4577	0.8594	8909	0.3169	nonDE
105040862	XM_010917586,XM_010917587,XR_003800249,XR_003800250,XR_003800251,XR_003800252	LOC105040862	casein kinase 1-like protein 4, transcript variant X1	protein_coding	XP_010915888.1		1281	1733	1712	1337	3480527116458	377997945767655	472339579049422	396348612468588	-0.3446	0.9207	8.63	0.2947	nonDE
105040863	XM_010917588	LOC105040863	probable lactoylglutathione lyase, chloroplastic	protein_coding	XP_010915890.1	.	196	250	139	77	532539668091935	545294209128181	383500008690827	228263598803899	0.7492	1324	5325	0.1758	nonDE
105040866	XM_010917601,XM_010917603,XM_010917604,XM_010917605,XM_019849264,XM_019849265,XR_831280,XR_831282	LOC105040866	protein phosphatase 2C and cyclic nucleotide-binding/kinase domain-containing protein, transcript variant X8	protein_coding	XP_010915903.1		138	219	125	112	374951398962689	477677727196287	344874108534917	332019780078398	0.2435	0.377	5247	0.6126	nonDE
105040867	XM_010917606	LOC105040867	probable aquaporin TIP2-2	protein_coding	XP_010915908.1	.	313	794	136	180	850433245473345	17318544081911	37522303008599	53360321798314	1379	2116	6207	0.06936	nonDE
105040871	XM_010917609	LOC105040871	tRNAse Z TRZ4, mitochondrial	protein_coding	XP_010915911.1	.	446	653	503	368	121179944882144	142430847424281	138777341274451	109092213454331	0.004583	0.006945	6992	0.9918	nonDE
105040873	XM_010917613	LOC105040873	ABC transporter E family member 2	protein_coding	XP_010915915.1	.	887	1029	949	743	24100137020283	224443096477159	261828423199709	220259550534152	-0.1383	0.2901	7885	0.6856	nonDE
105040877	XM_010917617,XM_029263308,XM_029263309,XM_029263310,XR_003800254	LOC105040877	60S ribosomal protein L27-3, transcript variant X4	protein_coding	XP_010915919.1		1752	2628	1209	1058	47602525433524	573213272635544	333562237774972	313640113681201	0.5999	1768	8684	0.1011	nonDE
105040879	XM_010917618	LOC105040879	glycosyltransferase-like At2g41451	protein_coding	XP_010915920.1	.	380	539	250	360	103247486670885	117565431488036	689748217069834	106720643596628	0.2771	0.4597	6605	0.5464	nonDE
105040882	XM_010917621	LOC105040882	putative pentatricopeptide repeat-containing protein At3g15200	protein_coding	XP_010915923.1	.	100	205	147	58	271703912291803	447141251485109	405571951637062	171938814683456	0.3123	0.2961	4.93	0.6811	nonDE
105040883	XM_010917622	LOC105040883	DNA replication licensing factor MCM6	protein_coding	XP_010915924.1	.	125	168	124	158	339629890364754	366437708534138	342115115666638	468385046896312	-0.2553	0.3761	5237	0.6134	nonDE
105040885	XM_010917625,XM_010917627,XM_019848856,XM_029263312,XM_029263313	LOC105040885	YTH domain-containing protein ECT4, transcript variant X1	protein_coding	XP_010915927.1		177	326	192	151	480915924756492	711063648703149	529726630709632	447633810641412	0.1822	0.2745	5741	0.7002	nonDE
105040886	XM_010917631	LOC105040886	uncharacterized LOC105040886	protein_coding	XP_010915933.1	.	255	225	255	198	692844976344099	490764788215363	70354318141123	586963539781454	-0.248	0.4011	5939	0.5944	nonDE
105040890	XM_019849283	LOC105040890	protein TSS	protein_coding	XP_019704842.1	.	208	206	169	137	565144137566951	449322428321622	466269794739208	406131338131612	0.1033	0.1453	5553	0.8364	nonDE
105040892	XM_010917637,XM_010917638	LOC105040892	cytochrome b561 and DOMON domain-containing protein At3g61750, transcript variant X1	protein_coding	XP_010915939.1		92	194	60	124	249967599308459	423148306283469	16553957209676	367593327943941	0.3874	0.3669	4831	0.6216	nonDE
105040897	XM_010917644	LOC105040897	phosphatidylinositol 4-kinase gamma 4	protein_coding	XP_010915946.1	.	337	351	136	269	915642184423378	765593069615967	37522303008599	797440364652581	0.5347	0.7253	6084	0.3772	nonDE
105040898	XM_010917645	LOC105040898	dipeptidyl aminopeptidase 4	protein_coding	XP_010915947.1	.	344	500	420	261	934661458283804	109058841825636	115877700467732	773724666075553	0.001417	0.00187	6613	0.998	nonDE
105040901	XM_010917651	LOC105040901	E3 ubiquitin-protein ligase SINAT5	protein_coding	XP_010915953.1	.	252	309	239	225	684693858975345	673983642482432	659399295518761	667004022478925	-0.05671	0.09083	6072	0.8979	nonDE
105040902	XM_010917653,XM_029263317	LOC105040902	CLP protease regulatory subunit CLPX1, mitochondrial, transcript variant X1	protein_coding	XP_010915955.1		194	380	161	188	527105589846099	828847197874836	444197851792973	557318916560168	0.3368	0.5298	5845	0.499	nonDE
105040909	XM_010917664	LOC105040909	protein SPA1-RELATED 4	protein_coding	XP_010915966.2	.	86	119	122	113	233665364570951	259560043545014	336597129930079	334984242400527	-0.5289	0.8898	4853	0.3049	nonDE
105040914	XM_010917663,XR_003800257,XR_831291,XR_831292,XR_831293	LOC105040914	exportin-2, transcript variant X3	protein_coding	XP_010915965.1	.	290	277	279	285	78794134564623	604185983714025	769759010249934	844871761806638	-0.3219	0.6116	6224	0.4458	nonDE
105040927	XM_010917684	LOC105040927	protein NLP3	protein_coding	XP_010915986.2	.	87	285	160	89	236382403693869	621635398406127	441438858924694	263837146669441	0.1274	0.09771	5183	0.8916	nonDE
105040929	XM_010917686	LOC105040929	eukaryotic translation initiation factor 1A	protein_coding	XP_010915988.1	.	176	204	181	126	478198885633574	444960074648596	49937770915856	373522252588198	-0.01186	0.0149	5484	0.9824	nonDE
105040932	XM_010917691	LOC105040932	RNA-binding KH domain-containing protein RCF3	protein_coding	XP_010915993.1	.	194	277	185	123	527105589846099	604185983714025	510413680631677	364628865621812	0.2883	0.498	5629	0.5205	nonDE
105040936	XM_010917697	LOC105040936	elongation factor G, mitochondrial	protein_coding	XP_010915999.1	.	762	772	663	528	207038381166354	168386851778782	18292122716692	156523610608388	0.0447	0.0728	7475	0.9179	nonDE
105040940	XM_010917702,XM_029263334	LOC105040940	nicotianamine aminotransferase A, transcript variant X2	protein_coding	XP_010916004.1		153	246	128	215	415706985806459	536569501782131	353151087139755	637359399257639	-0.06711	0.07028	5569	0.9209	nonDE
105040942	XM_010917707	LOC105040942	probable LIM domain-containing serine/threonine-protein kinase DDB_G0286997	protein_coding	XP_010916009.1	.	251	470	437	340	681976819852427	102515311316098	120567988343807	100791718952371	-0.4812	0.9982	6587	0.2665	nonDE
105040943	XM_010917704,XM_019849380	LOC105040943	D-amino-acid transaminase, chloroplastic, transcript variant X1	protein_coding	XP_010916006.1		1004	1738	558	701	272790727940971	379088534185912	153951802049987	207808808781212	0.7588	1744	7907	0.104	nonDE
105040944	XM_010917705,XM_029263335	LOC105040944	protein DEHYDRATION-INDUCED 19, transcript variant X1	protein_coding	XP_010916007.1		119	113	151	146	323327655627246	246472982525938	416607923110179	432811499030769	-0.7062	1301	5119	0.1798	nonDE
105040948	XM_010917713	LOC105040948	dnaJ homolog subfamily B member 13	protein_coding	XP_010916015.1	.	122	147	57	42	331478772996	320632994967371	157262593491922	124507417529399	1106	1649	4427	0.115	nonDE
105040953	XM_010917720	LOC105040953	guanylate-binding protein 4	protein_coding	XP_010916022.1	.	305	284	459	339	828696932490001	619454221569614	126637772654021	100495272720158	-0.7551	1697	6492	0.109	nonDE
105040957	XM_010917725,XR_003800275	LOC105040957	auxin response factor 3, transcript variant X2	protein_coding	XP_010916027.1	.	209	211	122	123	567861176689869	460228312504185	336597129930079	364628865621812	0.4458	0.7902	5408	0.3471	nonDE
105040965	XM_010917731	LOC105040965	trans-resveratrol di-O-methyltransferase	protein_coding	XP_010916033.1	.	157	94	237	156	426575142298131	205030622632196	653881309782202	462456122252055	-1066	1567	5339	0.1295	nonDE
105040969	XM_010917736,XM_019849510	LOC105040969	transcription factor VOZ1, transcript variant X2	protein_coding	XP_010916038.1		149	262	191	144	404838829314787	571468331166334	526967637841353	426882574386512	-0.06021	0.07879	5582	0.9105	nonDE
105040970	XM_010917738	LOC105040970	acyl-coenzyme A oxidase 3, peroxisomal	protein_coding	XP_010916040.1	.	400	531	318	267	108681564916721	115820490018826	877359732112828	791511440008324	0.3379	0.7992	6597	0.3426	nonDE
105040981	XM_010917754	LOC105040981	C2 domain-containing protein At1g53590	protein_coding	XP_010916056.1	.	479	385	564	706	130146173987774	839753082057399	155607197770954	209291039942276	-0.8881	1748	7103	0.1033	nonDE
105040982	XM_010917757	LOC105040982	proton pump-interactor BIP131	protein_coding	XP_010916059.1	.	494	386	495	471	134221732672151	841934258893912	136570146979827	139626175372255	-0.4823	0.9043	6922	0.3008	nonDE
105040986	XM_010917758	LOC105040986	aspartyl protease family protein 2	protein_coding	XP_010916060.1	.	198	165	550	462	537973746337771	3598941780246	151744607755363	136958159282339	-1827	3744	6318	0.01622	downReg
105040987	XM_010917759	LOC105040987	60S ribosomal protein L18a-like protein	protein_coding	XP_010916061.1	.	382	369	614	614	103790894495469	804854252673196	169402162112351	182017986578693	-1039	2598	6987	0.04266	downReg
105040989	XM_010917761,XM_010917762,XM_029263344,XM_029263345	LOC105040989	P-loop guanosine triphosphatase YjiA, transcript variant X4	protein_coding	XP_010916063.1		181	322	308	182	491784081248164	702338941357098	849769803430035	539532142627397	-0.2901	0.4452	5982	0.557	nonDE
105040995	XM_010917768,XM_010917769,XM_010917770	LOC105040995	CTD small phosphatase-like protein 2, transcript variant X1	protein_coding	XP_010916070.1		89	113	167	143	241816481939705	246472982525938	460751809002649	423918112064383	-0.9479	1896	5044	0.08842	nonDE
105040996	XM_010917772	LOC105040996	mitogen-activated protein kinase 10	protein_coding	XP_010916074.1	.	277	286	165	260	752619837048296	62381657524264	45523382326609	770760203753424	0.1245	0.1505	5996	0.8302	nonDE
105040999	XM_019848828	LOC105040999	protein REDUCED WALL ACETYLATION 3	protein_coding	XP_019704387.1	.	434	597	291	336	117919497934643	13021625713981	802866924669286	996059340235194	0.3836	0.8565	6.72	0.3183	nonDE
105041001	XM_019849594	LOC105041001	protein MEI2-like 2	protein_coding	XP_019705153.2	.	367	542	517	411	997153358110919	11821978453899	142639931290042	121839401439484	-0.3678	0.8823	6904	0.3075	nonDE
105041010	XM_019848893	LOC105041010	glutathionyl-hydroquinone reductase YqjG	protein_coding	XP_019704452.1	.	441	642	464	446	119821425320685	140031552904117	128017269088161	132215019566934	-0.09253	0.171	7022	0.806	nonDE
105041016	XM_010917798,XM_010917799,XM_010917800,XM_029263350	LOC105041016	aspartic proteinase oryzasin-1, transcript variant X3	protein_coding	XP_010916100.1		439	889	370	414	119278017496102	193906620765981	102082736126335	122728740136122	0.3665	0.6475	7029	0.4233	nonDE
105041017	XM_010917801	LOC105041017	probable WRKY transcription factor 31	protein_coding	XP_010916103.2	.	605	512	1131	873	164380866936541	111676254029452	312042093402393	258797560721823	-1171	2714	7617	0.03787	downReg
105041025	XM_019848923	LOC105041025	uncharacterized LOC105041025	protein_coding	XP_019704482.1	.	137	147	108	108	372234359839771	320632994967371	297971229774168	320161930789884	0.05711	0.06754	5036	0.9246	nonDE
105041027	XM_010917817,XM_010917818,XM_029263356	LOC105041027	probable phosphoinositide phosphatase SAC9, transcript variant X1	protein_coding	XP_010916119.1		707	1041	967	887	192094665990305	227060508680975	266794610362612	262947807972803	-0.431	1215	7879	0.2003	nonDE
105041043	XM_010917835	LOC105041043	coiled-coil domain-containing protein 130	protein_coding	XP_010916137.1	.	873	1315	716	477	237197515430744	286824754001423	1975438893688	141404852765532	0.5479	1355	7707	0.1675	nonDE
105041044	XM_010917837,XM_010917838,XM_029263361	LOC105041044	DNA mismatch repair protein MSH2, transcript variant X1	protein_coding	XP_010916139.1		189	394	493	391	513520394231509	859383673586014	136018348406171	115910476795227	-0.9961	2125	6515	0.0688	nonDE
105041051	XM_010917843	LOC105041051	myosin-binding protein 3	protein_coding	XP_010916145.1	.	707	739	976	1005	192094665990305	16118896821829	269277703944063	29792846337392	-0.7818	2152	7803	0.06673	nonDE
105041066	XM_010917857,XR_002164214,XR_002164216,XR_003800290,XR_003800291,XR_003800292,XR_003800293,XR_831324,XR_831325,XR_831328,XR_831329,XR_831330	LOC105041066	serine/threonine-protein kinase prpf4B, transcript variant X12	protein_coding	XP_010916159.1	.	770	927	938	746	209212012464689	20219509274473	258793531044602	22114888923079	-0.3104	0.8013	7794	0.3418	nonDE
105041071	XM_010917864	LOC105041071	14-3-3-like protein	protein_coding	XP_010916166.1	.	561	445	276	321	152425894795702	970623692248163	761482031645096	951592405403266	0.4118	0.6801	6671	0.4027	nonDE
105041072	XM_010917865	LOC105041072	protein CASP	protein_coding	XP_010916167.1	.	684	1093	569	563	185845476007594	238402628230841	156986694205094	166899228735838	0.2925	0.6748	7529	0.4066	nonDE
105041073	XM_010917866,XM_029263368,XM_029263369,XM_029263370	LOC105041073	ubiquitin receptor RAD23c, transcript variant X4	protein_coding	XP_010916168.1		372	368	321	286	101073855372551	802673075836683	885636710717666	847836224128767	-0.04244	0.06311	6467	0.9297	nonDE
105041076	XM_010917869,XM_029263371	LOC105041076	phosphatidylinositol 4-kinase alpha 1, transcript variant X1	protein_coding	XP_010916171.1		1187	1611	1186	1169	322512543890371	3513875883622	327216554177929	346545645456828	-0.09095	0.1853	8396	0.7913	nonDE
105041078	XM_010917873,XM_019848876,XM_019848877	LOC105041078	U-box domain-containing protein 11, transcript variant X1	protein_coding	XP_010916175.1		110	152	147	97	298874303520984	331538879149934	405571951637062	28755284524647	-0.2156	0.2956	5041	0.6812	nonDE
105041082	XM_010917878,XM_029263372,XR_003800302,XR_003800303	LOC105041082	probable serine/threonine protein kinase IREH1, transcript variant X4	protein_coding	XP_010916180.1		1055	1265	1586	1363	286647627467853	27591886981886	437576268909102	404056214506122	-0.6702	2.05	8426	0.07432	nonDE
105041085	XM_010917880,XM_010917881,XM_010917883,XM_019849310,XM_029263373,XR_831337,XR_831338,XR_831339	LOC105041085	uncharacterized LOC105041085, transcript variant X8	protein_coding	XP_010916182.1		104	152	140	99	282572068783476	331538879149934	386259001559107	293481769890727	-0.227	0.3174	5011	0.6629	nonDE
105041089	XM_010917890,XM_019849518,XM_029263374,XR_002164366,XR_003800304	LOC105041089	uncharacterized LOC105041089, transcript variant X1	protein_coding	XP_010916192.1		175	227	250	260	475481846510656	495127141888389	689748217069834	770760203753424	-0.6751	1624	5898	0.1193	nonDE
105041098	XM_010917900	LOC105041098	ubiquitin-conjugating enzyme E2 variant 1D	protein_coding	XP_010916202.1	.	350	501	223	125	950963693021312	109276959509288	615255409626292	370557790266069	0.9903	2068	6128	0.07326	nonDE
105041102	XM_010917903	LOC105041102	probable inactive receptor kinase At1g48480	protein_coding	XP_010916205.1	.	111	171	47	84	301591342643902	372981239043676	129672664809129	249014835058799	0.8473	1106	4626	0.231	nonDE
105041105	XM_010917911	LOC105041105	protein VAC14 homolog	protein_coding	XP_010916213.1	.	239	311	241	195	64937235037741	678345996155458	66491728125532	578070152815068	0.005451	0.007943	6006	0.9902	nonDE
105041106	XM_010917913,XM_010917914,XM_010917916,XR_003800305	LOC105041106	uncharacterized LOC105041106, transcript variant X4	protein_coding	XP_010916215.1		138	256	223	125	374951398962689	558381270147258	615255409626292	370557790266069	-0.1465	0.1765	5551	0.7995	nonDE
105041107	XM_010917918	LOC105041107	nuclear pore complex protein NUP155	protein_coding	XP_010916220.1	.	719	999	1056	838	195355112937807	217899565967621	291349646890298	248421942594373	-0.4724	1.35	7881	0.1689	nonDE
105041110	XM_010917921,XM_010917922	LOC105041110	microtubule-associated protein 70-1, transcript variant X1	protein_coding	XP_010916223.1		193	173	115	159	524388550723181	377343592716702	317284179852123	47134950921844	0.1071	0.1202	5379	0.868	nonDE
105041111	XM_010917926,XM_010917935,XM_010917944,XM_019854527,XM_029264301,XM_029264304,XM_029264306	LOC105041111	alpha,alpha-trehalose-phosphate synthase [UDP-forming] 1, transcript variant X4	protein_coding	XP_010916228.1		91	144	117	160	247250560185541	314089464457833	322802165588682	474313971540569	-0.5416	0.8248	5051	0.3319	nonDE
105041117	XM_010917933	LOC105041117	NADH dehydrogenase [ubiquinone] iron-sulfur protein 1, mitochondrial	protein_coding	XP_010916235.1	.	534	551	356	437	145089889163823	120182843691851	982201461107443	129547003477018	0.1342	0.2138	6933	0.7614	nonDE
105041118	XM_010917934	LOC105041118	translocase of chloroplast 34, chloroplastic	protein_coding	XP_010916236.1	.	101	146	124	100	274420951414722	318451818130858	342115115666638	296446232212855	-0.1922	0.2632	4946	0.7116	nonDE
105041119	XM_029263384,XM_029263385,XM_029263386,XM_029263388,XM_029263389,XM_029263390,XM_029263391	LOC105041119	heat stress transcription factor A-1, transcript variant X5	protein_coding	XP_029119217.1		73	134	138	99	198343855973017	292277696092705	380741015822548	293481769890727	-0.5377	0.8007	4833	0.342	nonDE
105041120	XM_010917938	LOC105041120	mitogen-activated protein kinase kinase 9	protein_coding	XP_010916240.1	.	123	356	476	226	334195812118918	77649895379853	131328060530096	669968484801053	-0.9378	1194	6114	0.2057	nonDE
105041125	XM_010917948,XM_010917949,XM_029263394,XM_029263395,XR_831345	LOC105041125	protein POLLEN DEFECTIVE IN GUIDANCE 1, transcript variant X3	protein_coding	XP_010916250.1		176	297	198	85	478198885633574	647809520444279	546280587919308	251979297380927	0.4716	0.6193	5511	0.4411	nonDE
105041126	XM_010917950	LOC105041126	vacuolar sorting protein 39	protein_coding	XP_010916252.1	.	302	519	282	339	820545815121246	11320307781501	778035988854772	100495272720158	0.04476	0.06077	6531	0.9323	nonDE
105041127	XM_010917953	LOC105041127	nuclear poly(A) polymerase 1	protein_coding	XP_010916255.1	.	279	476	244	208	758053915294132	103824017418006	673194259860158	616608163002739	0.3766	0.7764	6243	0.3536	nonDE
105041129	XM_010917955	LOC105041129	fructose-bisphosphate aldolase 1, chloroplastic	protein_coding	XP_010916257.1	.	1720	1049	625	805	467330729141902	228805450150185	172437054267458	238639216931349	0.6043	0.8564	8.01	0.3183	nonDE
105041130	XM_019853413,XM_029262763	LOC105041130	ABC transporter G family member 39, transcript variant X2	protein_coding	XP_019708972.1		336	115	431	241	91292514530046	250835336198963	118912592622839	714435419632982	-1108	1096	6057	0.2344	nonDE
105041131	XM_010917956	LOC105041131	T-complex protein 1 subunit delta	protein_coding	XP_010916258.1	.	259	234	169	179	703713132835771	510395379743978	466269794739208	530638755661011	0.169	0.2453	5774	0.7289	nonDE
105041133	XM_010917958	LOC105041133	CDP-diacylglycerol--serine O-phosphatidyltransferase 1	protein_coding	XP_010916260.1	.	167	330	83	64	453745533527312	7197883560492	228996408067185	189725588616228	1369	2128	5116	0.06855	nonDE
105041146	XM_010917986	LOC105041146	leucine--tRNA ligase, chloroplastic/mitochondrial	protein_coding	XP_010916288.1	.	246	390	269	298	668391624237836	850658966239963	742169081567141	883409771994309	-0.1861	0.3255	6.29	0.655	nonDE
105041148	XM_010917989,XM_019849606	LOC105041148	protein DETOXIFICATION 16, transcript variant X2	protein_coding	XP_010916291.1		203	295	130	99	551558941952361	643447166771254	358669072876313	293481769890727	0.7802	1626	5463	0.1191	nonDE
105041149	XM_010917990	LOC105041149	ATP synthase subunit beta, mitochondrial	protein_coding	XP_010916292.1	.	691	922	264	413	187747403393636	201104504326473	728374117225744	122432293903909	0.9558	1988	7083	0.07887	nonDE
105041151	XM_010917998	LOC105041151	uncharacterized LOC105041151	protein_coding	XP_010916300.1	.	141	299	181	144	383102516331443	652171874117305	49937770915856	426882574386512	0.04383	0.04984	5.59	0.9438	nonDE
105041156	XM_010918001,XM_010918002,XM_010918003,XM_010918004,XM_029263397	LOC105041156	peptidyl-prolyl cis-trans isomerase FKBP42, transcript variant X3	protein_coding	XP_010916303.1		291	325	143	148	790658384769148	708882471866636	394535980163945	438740423675026	0.7568	1706	5806	0.1081	nonDE
105041159	XM_010918017	LOC105041159	integrin-linked protein kinase 1	protein_coding	XP_010916319.1	.	286	352	338	380	777073189154558	767774246452479	932539589478415	112649568240885	-0.4967	1161	6477	0.2154	nonDE
105041163	XM_010918015,XM_019849539	LOC105041163	protein PIN-LIKES 2, transcript variant X2	protein_coding	XP_010916317.1		192	207	137	135	521671511600263	451503605158134	377982022954269	400202413487355	0.2221	0.3586	5446	0.6285	nonDE
105041166	XM_010918018,XM_010918019,XM_010918020,XM_029263398	LOC105041166	oligoribonuclease, transcript variant X2	protein_coding	XP_010916320.1		615	899	431	333	167097906059459	196087797602494	118912592622839	987165953268809	0.6502	1761	7131	0.102	nonDE
105041173	XM_010918027	LOC105041173	guanine nucleotide-binding protein subunit beta-like protein A	protein_coding	XP_010916329.1	.	297	357	248	216	806960619506656	778680130635043	684230231333275	640323861579768	0.1667	0.3141	6181	0.6652	nonDE
105041174	XM_010918028,XM_010918030	LOC105041174	rDNA transcriptional regulator pol5, transcript variant X1	protein_coding	XP_010916330.1		889	835	1350	855	241544778027413	182128265848813	37246403721771	253461528541991	-0.6456	1423	7989	0.153	nonDE
105041175	XM_010918032	LOC105041175	ABC transporter G family member 7	protein_coding	XP_010916334.1	.	196	188	164	155	532539668091935	410061245264392	452474830397811	459491659929926	-0.07009	0.09356	5533	0.8954	nonDE
105041189	XM_010918047,XM_019848855	LOC105041189	pyridoxal kinase, transcript variant X1	protein_coding	XP_010916349.1		177	182	167	127	480915924756492	396974184245316	460751809002649	376486714910326	-0.04247	0.05417	5419	0.9391	nonDE
105041195	XM_010918055,XM_010918057,XM_019849555,XM_029263403,XR_003800309	LOC105041195	carbon catabolite repressor protein 4 homolog 5, transcript variant X3	protein_coding	XP_010916357.1		178	320	210	123	48363296387941	697976587684072	57938850233866	364628865621812	0.2451	0.344	5695	0.6388	nonDE
105041200	XM_010918063	LOC105041200	alpha-xylosidase 1	protein_coding	XP_010916365.1	.	165	328	119	218	448311455281476	715426002376174	328320151325241	646252786224025	0.2465	0.2664	5679	0.7088	nonDE
105041202	XM_010918065,XM_029263404	LOC105041202	uncharacterized LOC105041202, transcript variant X2	protein_coding	XP_010916367.1		105	89	139	111	285289107906394	194124738449633	383500008690827	32905531775627	-0.7301	1162	4.86	0.2154	nonDE
105041205	XM_010918068	LOC105041205	metal tolerance protein 10-like	protein_coding	XP_010916370.1	.	117	270	112	75	31789357738141	588917745858436	309007201247285	222334674159642	0.652	0.8472	5.08	0.3229	nonDE
105041209	XM_010918071	LOC105041209	KH domain-containing protein HEN4	protein_coding	XP_010916373.1	.	619	791	715	544	168184721708626	172531087768157	197267990081972	161266750323793	-0.1591	0.3349	7447	0.6462	nonDE
105041210	XM_010918073	LOC105041210	NAC domain-containing protein 100	protein_coding	XP_010916375.1	.	55	139	98	105	149437151760492	303183580275269	270381301091375	311268543823498	-0.4619	0.5282	4643	0.5	nonDE
105041212	XM_010918075,XM_010918077,XM_010918078,XM_010918079,XM_029263405	LOC105041212	caffeoylshikimate esterase, transcript variant X3	protein_coding	XP_010916377.1		202	175	218	205	548841902829443	381705946389727	601460445284895	607714776036354	-0.5128	0.9681	5721	0.277	nonDE
105041215	XM_010918085,XM_029264272	LOC105041215	MACPF domain-containing protein CAD1, transcript variant X1	protein_coding	XP_010916387.1		137	128	146	133	372234359839771	279190635073629	402812958768783	394273488843098	-0.4268	0.7089	5169	0.3867	nonDE
105041217	XM_010918082,XM_010918083	LOC105041217	synaptotagmin-5, transcript variant X1	protein_coding	XP_010916384.1		617	1059	1242	975	167641313884043	230986626986698	342666914240293	289035076407534	-0.7622	2036	7.96	0.07534	nonDE
105041219	XM_010918086,XM_029263407	LOC105041219	uncharacterized LOC105041219, transcript variant X1	protein_coding	XP_010916388.1		386	641	377	260	104877710144636	139813435220466	104014031134131	770760203753424	0.3491	0.6977	6704	0.3934	nonDE
105041220	XM_010918088,XM_029263408	LOC105041220	uncharacterized LOC105041220, transcript variant X2	protein_coding	XP_010916390.1		349	332	270	340	948246653898394	724150709722225	74492807443542	100791718952371	-0.1594	0.2344	6407	0.7405	nonDE
105041246	XM_010918126,XM_019849237	LOC105041246	ribonucleoside-diphosphate reductase large subunit, transcript variant X1	protein_coding	XP_010916428.1		148	212	185	232	402121790191869	462409489340698	510413680631677	687755258733825	-0.5351	1044	5663	0.2501	nonDE
105041251	XM_010918132	LOC105041251	delta(7)-sterol-C5(6)-desaturase	protein_coding	XP_010916434.1	.	343	530	175	147	931944419160886	115602372335174	482823751948884	435775961352898	1088	2621	6112	0.04163	upReg
105041263	XM_010918145,XM_010918146,XM_010918147,XM_029263419,XM_029263420,XM_029263421	LOC105041263	LEAF RUST 10 DISEASE-RESISTANCE LOCUS RECEPTOR-LIKE PROTEIN KINASE-like 1.2, transcript variant X6	protein_coding	XP_010916447.1		209	260	639	271	567861176689869	567105977493309	176299644283049	803369289296838	-1169	1903	6363	0.08754	nonDE
105041267	XM_010918153,XM_010918155,XR_831363	LOC105041267	L-Ala-D/L-amino acid epimerase, transcript variant X2	protein_coding	XP_010916455.1		158	199	122	125	429292181421049	434054190466032	336597129930079	370557790266069	0.2016	0.3143	5292	0.6652	nonDE
105041275	XM_010918169,XM_010918170,XM_029263428,XM_029263429,XM_029263430,XM_029263431,XM_029263432,XM_029263433,XM_029263434,XM_029263435,XM_029263436,XM_029263437,XM_029263438,XR_831365	LOC105041275	lipid phosphate phosphatase 2, transcript variant X1	protein_coding	XP_010916471.1		105	161	104	86	285289107906394	351169470678549	286935258301051	254943759703056	0.1471	0.1836	4877	0.7932	nonDE
105041276	XM_010918171	LOC105041276	60S ribosomal protein L26-2	protein_coding	XP_010916473.1	.	973	1516	638	620	264367906659925	330666408415329	176023744996222	18379666397197	0.6269	1759	7.85	0.1021	nonDE
105041280	XM_010918178	LOC105041280	citrate synthase, glyoxysomal	protein_coding	XP_010916480.1	.	925	1155	808	719	251326118869918	25192592461722	22292662375697	213144840961043	0.1165	0.2497	7872	0.7247	nonDE
105041281	XM_010918177	LOC105041281	AP2/ERF and B3 domain-containing transcription repressor RAV2	protein_coding	XP_010916479.1	.	170	99	371	443	461896650896066	21593650681476	102358635413163	131325680870295	-2037	3114	5923	0.02541	downReg
105041283	XM_010918179	LOC105041283	protein SUPPRESSOR OF K(+) TRANSPORT GROWTH DEFECT 1	protein_coding	XP_010916481.1	.	986	1441	1082	761	267900057519718	314307582141484	298523028347824	225595582713983	0.06945	0.1229	8101	0.8649	nonDE
105041296	XM_029263456,XR_003800312	LOC105041296	DEAD-box ATP-dependent RNA helicase 21-like, transcript variant X1	protein_coding	XP_029119289.1	.	290	300	358	275	78794134564623	654353050953818	987719446844002	815227138585353	-0.4187	0.9052	6329	0.3005	nonDE
105041297	XM_010918202	LOC105041297	ribosome biogenesis protein BOP1 homolog	protein_coding	XP_010916504.1	.	318	452	401	337	864018441087935	985891930103752	110635614018001	999023802557323	-0.2764	0.6144	6624	0.444	nonDE
105041299	XM_010918206	LOC105041299	tubulin beta chain	protein_coding	XP_010916508.1	.	264	545	23	134	717298328450361	118874137589944	634568359704247	397237951165226	2522	2159	5269	0.06669	nonDE
105041302	XM_010918209,XR_003800313	LOC105041302	phytanoyl-CoA dioxygenase, transcript variant X2	protein_coding	XP_010916511.1	.	483	660	250	219	131232989636941	14395767120984	689748217069834	649217248546153	0.9474	2579	6586	0.04378	upReg
105041306	XM_010918214,XM_019849506,XR_831371	LOC105041306	outer envelope protein 64, chloroplastic, transcript variant X3	protein_coding	XP_010916516.1		153	188	213	206	415706985806459	410061245264392	587665480943498	610679238358482	-0.6287	1449	5.64	0.1484	nonDE
105041307	XM_010918216	LOC105041307	DELLA protein SLR1	protein_coding	XP_010916518.1	.	108	79	104	121	293440225275148	172312970084505	286935258301051	358699940977555	-0.647	0.8575	4754	0.3178	nonDE
105041309	XM_010918223,XM_010918231,XM_019851536,XM_019851538,XM_019851541,XM_029264245	LOC105041309	probable LRR receptor-like serine/threonine-protein kinase At1g53440, transcript variant X3	protein_coding	XP_010916525.1		530	621	1327	1072	144003073514656	13545108154744	366118353620668	317790360932181	-1381	3796	7771	0.01613	downReg
105041310	XM_010918225,XM_010918226,XM_019849332,XM_019849333,XM_029263460,XR_003800314,XR_831372,XR_831373	LOC105041310	uncharacterized LOC105041310, transcript variant X7	protein_coding	XP_010916527.1		115	202	185	128	312459499135574	440597720975571	510413680631677	379451177232455	-0.321	0.5031	5341	0.5171	nonDE
105041314	XM_010918235	LOC105041314	importin-4	protein_coding	XP_010916537.1	.	424	401	386	442	115202458811725	874651911441603	106497124715582	131029234638082	-0.3314	0.6239	6769	0.438	nonDE
105041316	XM_010918238,XM_010918239,XM_010918241,XM_029263463,XM_029263464,XM_029263465	LOC105041316	oxysterol-binding protein-related protein 1C, transcript variant X6	protein_coding	XP_010916540.1		387	221	323	591	105149414056928	482040080869312	891154696454225	175199723237798	-0.9112	1091	6562	0.2358	nonDE
105041322	XM_010918248	LOC105041322	transmembrane protein 87B	protein_coding	XP_010916550.1	.	357	519	183	267	969982966881738	11320307781501	504895694895118	791511440008324	0.6504	1281	6349	0.1851	nonDE
105041325	XM_010918251	LOC105041325	mitogen-activated protein kinase kinase kinase 1	protein_coding	XP_010916553.1	.	272	280	667	469	739034641433705	610729514223563	184024824314232	139033282907829	-1.35	3178	6698	0.02519	downReg
105041328	XM_010918254,XM_010918255,XM_029263470	LOC105041328	eukaryotic peptide chain release factor subunit 1-3, transcript variant X3	protein_coding	XP_010916556.1		274	286	335	290	744468719679542	62381657524264	924262610873577	859694073417281	-0.4835	1116	6287	0.2286	nonDE
105041329	XM_019848803	LOC105041329	uncharacterized LOC105041329	protein_coding	XP_019704362.1	.	88	108	131	110	239099442816787	235567098343374	361428065744593	326090855434141	-0.63	1095	4842	0.2344	nonDE
105041330	XM_010918257	LOC105041330	beta-1,3-galactosyltransferase 7	protein_coding	XP_010916559.1	.	728	498	1299	950	197800448148433	108622606458334	358393173589486	281623920602213	-1223	2337	7754	0.05556	nonDE
105041332	XM_010918263	LOC105041332	probable LRR receptor-like serine/threonine-protein kinase At1g53440	protein_coding	XP_010916565.2	.	186	155	243	248	505369276862754	338082409659472	670435266991878	735186655887882	-0.8809	1769	5755	0.1011	nonDE
105041333	XM_010918259	LOC105041333	pinin	protein_coding	XP_010916561.1	.	1803	2417	2128	1295	489882153862122	527190441385126	587113682369842	383897870715648	0.008388	0.01199	8941	0.9863	nonDE
105041334	XM_010918260,XM_010918261,XM_010918262,XM_019849511,XM_029263471,XM_029263472	LOC105041334	phosphatidylinositol 4-phosphate 5-kinase 1, transcript variant X1	protein_coding	XP_010916562.1		196	224	180	168	532539668091935	488583611378851	49661871629028	498029670117597	-0.05937	0.08754	5658	0.9015	nonDE
105041339	XM_010918272,XM_029263477	LOC105041339	eukaryotic translation initiation factor 5B, transcript variant X1	protein_coding	XP_010916574.1		256	313	169	129	695562015467017	682708349828483	466269794739208	382415639554584	0.6064	1356	5757	0.1675	nonDE
105041353	XM_010918296,XR_002165550,XR_002165551,XR_003800720,XR_003800721,XR_831380,XR_831381	LOC105041353	heat stress transcription factor A-4b, transcript variant X7	protein_coding	XP_010916598.1	.	144	167	165	117	391253633700197	364256531697625	45523382326609	346842091689041	-0.1835	0.2715	5.28	0.7036	nonDE
105041355	NM_001303597	LOC105041355	probable BOI-related E3 ubiquitin-protein ligase 2	protein_coding	NP_001290526.1	.	645	986	488	289	175249023428213	215064036080155	134638851972032	856729611095152	0.7609	1727	7175	0.105	nonDE
105041356	XM_010918298	LOC105041356	uncharacterized TPR repeat-containing protein At1g05150	protein_coding	XP_010916600.1	.	265	264	411	300	720015367573279	57583068483936	113394606886281	889338696638566	-0.741	1705	6332	0.1081	nonDE
105041360	XM_010918302,XM_010918303,XM_010918304	LOC105041360	CLK4-associating serine/arginine rich protein, transcript variant X2	protein_coding	XP_010916604.1		569	768	623	527	154599526094036	167514381044177	171885255693803	156227164376175	-0.1162	0.2371	7345	0.7371	nonDE
105041366	XM_010918313,XM_010918314,XM_010918315,XM_010918316	LOC105041366	uncharacterized LOC105041366, transcript variant X4	protein_coding	XP_010916615.1		946	964	1825	1311	257031901028046	210265447039827	503516198460979	388641010431054	-1019	2676	8326	0.03914	downReg
105041368	XM_010918321	LOC105041368	protein BZR1 homolog 3	protein_coding	XP_010916623.1	.	162	197	280	178	440160337912722	429691836793007	772518003118214	527674293338883	-0.6542	1.35	5723	0.1689	nonDE
105041369	XM_010918317,XR_003800323,XR_003800324,XR_831383	LOC105041369	protein WEAK CHLOROPLAST MOVEMENT UNDER BLUE LIGHT 1, transcript variant X3	protein_coding	XP_010916619.1	.	475	309	212	375	129059358338607	673983642482432	584906488075219	111167337079821	0.1063	0.09345	6441	0.8954	nonDE
105041372	XM_010918326,XM_010918327,XM_010918329	LOC105041372	phosphatidate phosphatase PAH2, transcript variant X1	protein_coding	XP_010916628.1		219	275	239	214	59503156791905	599823630041	659399295518761	634394936935511	-0.2062	0.3991	5961	0.5963	nonDE
105041374	XM_010918331	LOC105041374	DEAD-box ATP-dependent RNA helicase 53, mitochondrial	protein_coding	XP_010916633.1	.	701	762	420	393	190464442516554	16620567494227	115877700467732	116503369259652	0.5201	1359	7169	0.1669	nonDE
105041376	XM_010918333,XM_010918335,XM_010918336,XM_010918337	LOC105041376	uncharacterized LOC105041376, transcript variant X4	protein_coding	XP_010916635.1		220	491	206	146	597748607041968	107095782672775	568352530865543	432811499030769	0.6047	0.9933	5.98	0.2683	nonDE
105041379	XM_010918340,XM_010918341	LOC105041379	uncharacterized LOC105041379, transcript variant X1	protein_coding	XP_010916642.1		404	652	578	504	109768380565889	14221272974063	159469787786546	149408901035279	-0.3892	0.9421	7119	0.2866	nonDE
105041383	XM_010918346,XM_019849602,XM_019849603,XM_029263482	LOC105041383	uncharacterized LOC105041383, transcript variant X1	protein_coding	XP_010916648.1		91	152	111	70	247250560185541	331538879149934	306248208379006	207512362548999	0.101	0.1054	4755	0.8837	nonDE
105041389	XM_010918357	LOC105041389	probable alpha,alpha-trehalose-phosphate synthase [UDP-forming] 7	protein_coding	XP_010916659.1	.	861	796	3596	2979	233937068483243	173621676186413	992133835433249	883113325762096	-2311	4931	8763	0.00764	downReg
105041390	XM_010918353	LOC105041390	uncharacterized LOC105041390	protein_coding	XP_010916655.1	.	129	175	175	82	350498046856426	381705946389727	482823751948884	243085910414542	-0.0219	0.02101	5151	0.976	nonDE
105041392	XM_010918358	LOC105041392	CDPK-related kinase 5	protein_coding	XP_010916660.1	.	809	1400	723	591	219808465044069	305364757111782	199475184376596	175199723237798	0.3794	0.8889	7783	0.305	nonDE
105041395	XM_010918363	LOC105041395	AP-4 complex subunit mu	protein_coding	XP_010916665.1	.	382	635	205	376	103790894495469	138504729118558	565593537997264	111463783312034	0.5183	0.7608	6.61	0.3605	nonDE
105041399	XM_010918365,XM_010918366	LOC105041399	ubiquitin carboxyl-terminal hydrolase 17, transcript variant X2	protein_coding	XP_010916667.1		327	514	295	273	888471793194197	112112489396754	813902896142404	809298213941096	0.2134	0.4202	6494	0.5768	nonDE
105041402	XM_010918372,XM_019849528,XM_029263488	LOC105041402	uncharacterized LOC105041402, transcript variant X1	protein_coding	XP_010916674.1		461	548	716	417	125255503566521	119528490640897	1975438893688	123618078832761	-0.4509	0.9137	7113	0.2976	nonDE
105041411	XM_010918381	LOC105041411	dentin sialophosphoprotein	protein_coding	XP_010916683.1	.	250	333	380	245	679259780729509	726331886558738	104841728994615	726293268921496	-0.4058	0.8315	6293	0.3288	nonDE
105041414	XM_010918384,XM_010918387,XM_029263492,XR_003800334,XR_831399	LOC105041414	WD and tetratricopeptide repeats protein 1, transcript variant X5	protein_coding	XP_010916686.1		204	323	221	103	554275981075279	70452011819361	609737423889733	305339619179241	0.424	0.6053	5702	0.4498	nonDE
105041418	XM_010918392	LOC105041418	GEM-like protein 1	protein_coding	XP_010916694.1	.	378	616	346	208	102704078846302	134360493129184	95461153242465	616608163002739	0.525	1048	6571	0.2488	nonDE
105041421	XM_010918394	LOC105041421	serine/threonine-protein kinase PEPKR2	protein_coding	XP_010916696.1	.	127	103	108	100	34506396861059	224661214160811	297971229774168	296446232212855	-0.2304	0.2699	4853	0.7046	nonDE
105041422	XM_010918395	LOC105041422	protein DETOXIFICATION 27	protein_coding	XP_010916697.1	.	60	50	99	140	163022347375082	109058841825636	273140293959654	415024725097998	-1.44	1871	4415	0.09035	nonDE
105041435	XM_010918408	LOC105041435	cytochrome c oxidase subunit 6b-1	protein_coding	XP_010916710.1	.	513	821	403	319	139384107005695	179074618277695	111187412591657	945663480759009	0.5367	1338	6993	0.172	nonDE
105041469	XM_010918442	LOC105041469	coiled-coil domain-containing protein 25	protein_coding	XP_010916744.1	.	161	192	197	132	437443298789804	418785952610443	543521595051029	391309026520969	-0.213	0.3361	5478	0.6456	nonDE
105041488	XM_010918456,XM_029264189	LOC105041488	ras-related protein Rab7, transcript variant X1	protein_coding	XP_010916758.1		441	662	255	240	119821425320685	144393906577142	70354318141123	711470957310853	0.8077	2138	6594	0.06788	nonDE
105041498	XM_019849921	LOC105041498	uncharacterized LOC105041498	protein_coding	XP_019705480.1	.	191	167	67	78	518954472477345	364256531697625	184852522174715	231228061126027	0.9632	1429	4913	0.1519	nonDE
105041500	XM_019849119	LOC105041500	ABC transporter C family member 10	protein_coding	XP_019704678.1	.	126	139	82	197	342346929487672	303183580275269	226237415198905	583999077459325	-0.238	0.2079	5103	0.7671	nonDE
105041516	XM_029263073	LOC105041516	uncharacterized LOC105041516	protein_coding	XP_029118906.1	.	338	446	297	291	918359223546296	972804869084676	819420881878962	862658535739409	0.07943	0.1375	6.48	0.8453	nonDE
105041528	XM_010918485	LOC105041528	60S ribosomal protein L37-1	protein_coding	XP_010916787.1	.	140	130	100	67	380385477208525	283552988746654	275899286827933	198618975582613	0.3505	0.4385	4.8	0.5635	nonDE
105041542	XM_010918493	LOC105041542	mitogen-activated protein kinase kinase kinase 18	protein_coding	XP_010916795.2	.	34	30	124	127	923793301792132	654353050953818	342115115666638	376486714910326	-2301	2925	4076	0.03039	downReg
105041572	XM_029264173	LOC105041572	kinesin-like protein KIN-13B	protein_coding	XP_029120006.1	.	190	308	86	186	516237433354427	67180246564592	237273386672023	551389991915911	0.6565	0.847	5533	0.3229	nonDE
105041586	XM_010918907,XM_010919600,XM_019853233,XM_029262976	LOC105041586	probable E3 ubiquitin-protein ligase RZFP34, transcript variant X2	protein_coding	XP_010917209.1		349	553	387	221	948246653898394	120619079059154	10677302400241	655146173190411	0.2651	0.4326	6566	0.5684	nonDE
105041594	XM_010918535	LOC105041594	protein SGT1 homolog	protein_coding	XP_010916837.1	.	269	205	295	185	730883524064951	447141251485109	813902896142404	548425529593783	-0.3425	0.4826	5953	0.5292	nonDE
105041597	XM_010918536	LOC105041597	probable pectin methyltransferase QUA2	protein_coding	XP_010916838.1	.	279	173	233	264	758053915294132	377343592716702	642845338309085	782618053041938	-0.5262	0.7255	5948	0.3772	nonDE
105041598	XM_010918537,XM_010918539,XM_010918540,XM_010918541,XM_010918542,XM_029263498,XM_029263499	LOC105041598	uncharacterized LOC105041598, transcript variant X2	protein_coding	XP_010916839.1		170	171	401	389	461896650896066	372981239043676	110635614018001	115317584330801	-1548	3505	6.1	0.01912	downReg
105041613	XM_010918574,XM_019849291,XM_019849293,XM_029263510,XR_003800339	LOC105041613	calmodulin-binding transcription activator 3, transcript variant X5	protein_coding	XP_010916876.1		1036	874	2104	1340	281485253134308	190634855511212	580492099485972	397237951165226	-1144	2446	8382	0.04922	downReg
105041622	XM_010918586,XM_010918587	LOC105041622	annexin D2, transcript variant X1	protein_coding	XP_010916888.1		652	594	89	202	177150950814256	129561904088856	245550365276861	598821389069968	1917	2731	6256	0.03747	upReg
105041623	XM_010918588	LOC105041623	uncharacterized LOC105041623	protein_coding	XP_010916890.1	.	109	201	34	93	296157264398066	438416544139058	938057575214974	275694995957956	1139	1208	4599	0.202	nonDE
105041626	XM_010918590	LOC105041626	RNA helicase aquarius	protein_coding	XP_010916892.1	.	1713	2305	2386	1620	465428801755859	502761260816183	658295698371449	480242896184826	-0.3067	0.7075	9027	0.3874	nonDE
105041630	XM_010918595,XM_010918597,XM_019849280,XM_019849281,XM_029263513,XM_029263514,XM_029263515,XM_029263516,XM_029263517,XM_029263518	LOC105041630	uncharacterized WD repeat-containing protein C2A9.03, transcript variant X6	protein_coding	XP_010916897.1		679	855	538	301	184486956446135	186490619521838	148433816313428	892303158960695	0.5905	1261	7192	0.19	nonDE
105041632	XM_010918599	LOC105041632	elongation factor 1-alpha	protein_coding	XP_010916901.1	.	2823	3047	2433	2409	767020144399761	664604582085428	671262964852362	714138973400769	-0.04455	0.07711	9458	0.9126	nonDE
105041633	XM_010918600	LOC105041633	acyl-coenzyme A oxidase 2, peroxisomal	protein_coding	XP_010916902.1	.	468	924	340	427	127157430952564	201540739693776	938057575214974	126582541154889	0.4793	0.8699	7047	0.3123	nonDE
105041644	XM_010918613,XM_019849316,XM_029263524	LOC105041644	acetyl-CoA carboxylase 1, transcript variant X3	protein_coding	XP_010916915.1		2345	2473	1996	2835	637145674324279	539405031669597	550694976508555	840425068323445	-0.3049	0.5349	9303	0.4952	nonDE
105041648	XM_010918616,XM_029263526,XR_003800341,XR_003800342	LOC105041648	protein CELLULOSE SYNTHASE INTERACTIVE 1, transcript variant X1	protein_coding	XP_010916918.1		1757	3245	2320	2628	477383773896699	70779188344838	640086345440806	779060698255384	-0.3749	0.7674	9324	0.3574	nonDE
105041650	XM_010918620	LOC105041650	apoptotic chromatin condensation inducer in the nucleus	protein_coding	XP_010916922.1	.	187	401	312	242	508086315985672	874651911441603	860805774903152	71739988195511	-0.3152	0.5014	6.18	0.5183	nonDE
105041653	XM_010918624,XM_010918625,XM_029263527,XR_003800343,XR_003800344	LOC105041653	F-box/kelch-repeat protein At1g22040, transcript variant X5	protein_coding	XP_010916926.2		154	168	138	156	418424024929377	366437708534138	380741015822548	462456122252055	-0.1945	0.2903	5346	0.6856	nonDE
105041655	XM_010918626,XM_019849383	LOC105041655	myosin-11, transcript variant X1	protein_coding	XP_010916928.1		576	853	464	643	156501453480079	186054384154536	128017269088161	190614927312866	0.04556	0.06291	7352	0.9298	nonDE
105041660	XM_010918637	LOC105041660	uncharacterized LOC105041660	protein_coding	XP_010916939.1	.	204	353	202	206	554275981075279	769955423288992	557316559392426	610679238358482	0.08322	0.1208	5951	0.8674	nonDE
105041661	XM_010918638	LOC105041661	40S ribosomal protein S27-2	protein_coding	XP_010916940.1	.	129	163	77	89	350498046856426	355531824351574	212442450857509	263837146669441	0.4908	0.7597	4.86	0.3612	nonDE
105041662	XM_010918642	LOC105041662	allene oxide cyclase, chloroplastic	protein_coding	XP_010916944.1	.	197	192	211	345	535256707214853	418785952610443	58214749520694	102273950113435	-0.802	1311	5921	0.1786	nonDE
105041665	XM_010918641	LOC105041665	LRR receptor kinase BAK1	protein_coding	XP_010916943.1	.	722	1086	706	899	196170224674682	236875804445282	194784896500521	266505162759357	-0.1652	0.2941	7793	0.6829	nonDE
105041667	XM_010918643	LOC105041667	probable inactive receptor kinase At5g10020	protein_coding	XP_010916945.2	.	91	141	93	120	247250560185541	307545933948294	256586336749978	355735478655427	-0.189	0.2244	4858	0.7504	nonDE
105041676	XM_010918664,XM_019849164,XM_019849165,XR_831413	LOC105041676	4-alpha-glucanotransferase DPE1, chloroplastic/amyloplastic, transcript variant X4	protein_coding	XP_010916966.1		115	186	85	115	312459499135574	405698891591367	234514393803743	340913167044784	0.2769	0.3558	4994	0.6301	nonDE
105041678	XM_010918666,XM_010918668,XM_019849161,XM_019849162,XM_029263538,XM_029263539	LOC105041678	E3 ubiquitin-protein ligase RKP, transcript variant X2	protein_coding	XP_010916968.1		1197	1557	3071	2679	325229583013289	339609233445031	847286709848584	79417945609824	-1393	3.97	9029	0.01613	downReg
105041680	XM_010918672,XM_010918673	LOC105041680	putative MYST-like histone acetyltransferase 1, transcript variant X1	protein_coding	XP_010916974.1		557	906	469	427	151339079146535	197614621388053	129396765522301	126582541154889	0.3493	0.8193	7218	0.3338	nonDE
105041681	XM_010918674	LOC105041681	uncharacterized oxidoreductase At4g09670	protein_coding	XP_010916976.1	.	176	294	200	167	478198885633574	641265989934741	551798573655867	495065207795469	0.001243	0.001622	5753	0.998	nonDE
105041686	XM_010918678	LOC105041686	uncharacterized oxidoreductase At4g09670	protein_coding	XP_010916980.1	.	316	444	245	194	858584362842099	96844251541165	675953252728437	57510569049294	0.4566	1075	6239	0.2394	nonDE
105041687	XM_010918680,XR_002164103	LOC105041687	shikimate kinase 3, chloroplastic, transcript variant X1	protein_coding	XP_010916982.1	.	150	249	112	108	407555868437705	543113032291669	309007201247285	320161930789884	0.5043	0.8906	5271	0.3049	nonDE
105041688	XM_010918681	LOC105041688	developmentally-regulated G-protein 3	protein_coding	XP_010916983.1	.	680	880	439	363	184758660358426	19194356161312	121119786917463	107609982293267	0.6298	1794	7197	0.09785	nonDE
105041690	XM_010918686	LOC105041690	golgin candidate 4-like	protein_coding	XP_010916988.1	.	251	446	396	352	681976819852427	972804869084676	109256117583862	104349073738925	-0.4728	1044	6545	0.2501	nonDE
105041691	XM_010918683	LOC105041691	ABC transporter F family member 2	protein_coding	XP_010916985.1	.	208	247	116	90	565144137566951	538750678618643	320043172720403	26680160899157	0.813	1644	5333	0.1157	nonDE
105041705	XM_010918704,XM_029263541	LOC105041705	probable serine/threonine-protein kinase PBL3, transcript variant X2	protein_coding	XP_010917006.1		299	319	397	389	812394697752492	695795410847559	10953201687069	115317584330801	-0.6733	1.69	6524	0.1102	nonDE
105041712	XM_010918713,XM_019848971,XM_019848972	LOC105041712	peptidyl-prolyl cis-trans isomerase CYP23, transcript variant X1	protein_coding	XP_010917015.1		195	263	125	96	529822628969017	573649508002847	344874108534917	284588382924341	0.7167	1472	5382	0.1449	nonDE
105041713	XM_010918718,XM_010918734,XM_029264136,XR_831418	LOC105041713	uncharacterized LOC105041713, transcript variant X4	protein_coding	XP_010917020.1		257	346	174	245	698279054589935	754687185433403	480064759080604	726293268921496	0.2168	0.3337	6036	0.6471	nonDE
105041714	XM_010918714,XM_010918716,XM_019849443,XM_019849444,XM_029263543,XM_029263544	LOC105041714	F-box/kelch-repeat protein At1g74510, transcript variant X1	protein_coding	XP_010917016.1		411	338	437	500	111670307951931	737237770741301	120567988343807	148223116106428	-0.6584	1299	6785	0.1802	nonDE
105041726	XM_010918733	LOC105041726	sphinganine C4-monooxygenase 1	protein_coding	XP_010917035.1	.	80	20	149	103	217363129833443	436235367302545	411089937373621	305339619179241	-2082	1883	4229	0.08869	nonDE
105041727	XM_010918735	LOC105041727	ATP-dependent 6-phosphofructokinase 5, chloroplastic	protein_coding	XP_010917037.1	.	521	433	611	499	14155773830403	94444957021001	168574464251867	147926669874215	-0.5543	1156	7.08	0.2173	nonDE
105041728	XM_010918736	LOC105041728	probable methyltransferase PMT2	protein_coding	XP_010917038.1	.	1129	1050	2071	2658	306753716977446	229023567833836	57138742302065	78795408522177	-1431	3149	8721	0.02522	downReg
105041733	XM_010918743	LOC105041733	uncharacterized LOC105041733	protein_coding	XP_010917045.1	.	349	401	330	226	948246653898394	874651911441603	91046764653218	669968484801053	0.1242	0.2044	6.4	0.7701	nonDE
105041734	XM_010918744	LOC105041734	probable apyrase 6	protein_coding	XP_010917046.1	.	271	382	402	486	736317602310787	833209551547861	110911513304829	144072868855448	-0.7741	1855	6639	0.09182	nonDE
105041737	XM_010918747,XM_010918748	LOC105041737	malate dehydrogenase, chloroplastic, transcript variant X2	protein_coding	XP_010917049.1		146	155	93	85	396687711946033	338082409659472	256586336749978	251979297380927	0.4168	0.6391	4938	0.4281	nonDE
105041739	XM_010918751,XM_010918753	LOC105041739	uncharacterized LOC105041739, transcript variant X1	protein_coding	XP_010917053.1		176	343	124	101	478198885633574	748143654923865	342115115666638	299410694534984	0.8191	1447	5456	0.1484	nonDE
105041744	XM_010918759	LOC105041744	probable calcium-binding protein CML45	protein_coding	XP_010917061.1	.	168	321	13	66	45646257265023	700157764520585	358669072876314	195654513260485	2.7	2293	4462	0.05759	nonDE
105041750	XM_010918764,XM_010918765	LOC105041750	soluble inorganic pyrophosphatase 1, transcript variant X1	protein_coding	XP_010917066.1		97	150	56	97	263552794923049	327176525476909	154503600623643	28755284524647	0.4287	0.487	4645	0.5261	nonDE
105041754	XM_029263550	LOC105041754	KH domain-containing protein At4g18375	protein_coding	XP_029119383.1	.	154	180	131	178	418424024929377	392611830572291	361428065744593	527674293338883	-0.1904	0.2624	5399	0.7124	nonDE
105041761	XM_019849039,XR_831422	LOC105041761	exosome complex component RRP41-like, transcript variant X1	protein_coding	XP_019704598.1	.	100	178	122	55	271703912291803	388249476899265	336597129930079	163045427717071	0.3779	0.4124	4793	0.5843	nonDE
105041765	XM_010918787	LOC105041765	protein BOBBER 1	protein_coding	XP_010917089.1	.	755	1083	443	269	205136453780312	236221451394328	122223384064775	797440364652581	1062	2.55	7205	0.04481	upReg
105041772	XM_010918797,XM_010918798,XM_029263554	LOC105041772	pectinesterase 31, transcript variant X1	protein_coding	XP_010917099.1		279	343	119	190	758053915294132	748143654923865	328320151325241	563247841204425	0.736	1.32	5834	0.1766	nonDE
105041773	XM_010918804	LOC105041773	acyl-lipid (9-3)-desaturase	protein_coding	XP_010917106.1	.	173	229	121	236	47004776826482	499489495561414	3338381370618	699613108022339	-0.06392	0.06141	5601	0.9316	nonDE
105041774	XM_010918802	LOC105041774	integrin-linked protein kinase 1	protein_coding	XP_010917104.1	.	294	443	244	218	798809502137902	966261338575138	673194259860158	646252786224025	0.3262	0.7077	6253	0.3873	nonDE
105041782	XM_010918813	LOC105041782	protein ABIL1	protein_coding	XP_010917115.1	.	94	186	50	119	255401677554295	405698891591367	137949643413967	352771016333298	0.5318	0.5083	4744	0.5142	nonDE
105041800	XM_010918827,XM_010918835	LOC105041800	uncharacterized LOC105041800, transcript variant X1	protein_coding	XP_010917129.1		162	201	151	134	440160337912722	438416544139058	416607923110179	397237951165226	0.01646	0.02179	5406	0.9756	nonDE
105041801	XM_010918824,XM_010918825	LOC105041801	PHD finger protein ALFIN-LIKE 3, transcript variant X1	protein_coding	XP_010917126.1		189	352	312	213	513520394231509	767774246452479	860805774903152	631430474613382	-0.314	0.5309	6091	0.4981	nonDE
105041802	XM_010918826,XM_010918828,XM_019849600,XM_029263555	LOC105041802	ubiquitin carboxyl-terminal hydrolase 26, transcript variant X1	protein_coding	XP_010917128.1		484	685	814	508	131504693549233	149410613301122	224582019477938	150594685964131	-0.4838	1092	7328	0.2358	nonDE
105041804	XM_010918833	LOC105041804	protein Brevis radix-like 1	protein_coding	XP_010917135.2	.	166	223	167	87	451028494404394	486402434542338	460751809002649	257908222025184	0.3279	0.4659	5334	0.5422	nonDE
105041806	XM_010918834,XR_003800356	LOC105041806	phospholipid:diacylglycerol acyltransferase 1, transcript variant X1	protein_coding	XP_010917136.1	.	520	837	543	430	141286034391738	182564501216115	149813312747568	127471879851528	0.1303	0.2421	7.22	0.7323	nonDE
105041807	XM_010918836	LOC105041807	putative lipoxygenase 5	protein_coding	XP_010917138.1	.	318	125	1396	1035	864018441087935	272647104564091	385155404411795	306821850340305	-2972	3666	7015	0.01649	downReg
105041809	XM_010918838,XM_010918839,XM_010918840	LOC105041809	26S proteasome non-ATPase regulatory subunit 11 homolog, transcript variant X1	protein_coding	XP_010917140.1		1057	1588	908	728	287191035292436	346370881638221	250516552439764	215812857050959	0.348	0.904	8082	0.3008	nonDE
105041813	XM_010918845,XM_029263559,XM_029263560,XR_003800357,XR_003800358	LOC105041813	eukaryotic peptide chain release factor GTP-binding subunit ERF3A, transcript variant X2	protein_coding	XP_010917147.1		793	765	501	473	2154612024474	166860027993224	138225542700795	140219067836681	0.3494	0.7689	7345	0.3568	nonDE
105041819	XM_029263566	LOC105041819	thermospermine synthase ACAULIS5	protein_coding	XP_029119399.1	.	91	306	191	157	247250560185541	667440111972894	526967637841353	465420584574183	-0.312	0.3138	5492	0.6652	nonDE
105041821	XM_010918862,XM_010918863,XM_010918864,XM_010918865,XM_010918866,XM_019849433,XM_019849437,XM_029263567,XM_029263568,XM_029263569	LOC105041821	protein FAR1-RELATED SEQUENCE 6, transcript variant X9	protein_coding	XP_010917164.1		248	351	245	291	673825702483673	765593069615967	675953252728437	862658535739409	-0.1733	0.2955	6213	0.6812	nonDE
105041831	XM_010918878,XM_029263570,XM_029263571	LOC105041831	uncharacterized LOC105041831, transcript variant X1	protein_coding	XP_010917180.1		335	441	429	279	910208106177542	961898984902112	118360794049183	827084987873867	-0.1742	0.3036	6.59	0.6751	nonDE
105041837	XM_010918887,XM_010918895,XM_010918902,XM_029264106	LOC105041837	uncharacterized LOC105041837, transcript variant X1	protein_coding	XP_010917189.1		167	157	214	393	453745533527312	342444763332498	590424473811778	116503369259652	-1178	1767	5841	0.1011	nonDE
105041846	XM_019849284	LOC105041846	protein OPAQUE1-like	protein_coding	XP_019704843.1	.	743	1045	1095	619	20187600683281	22793297941558	302109719076587	183500217739758	-0.2273	0.3969	7813	0.5981	nonDE
105041847	XM_019849312,XM_029263575,XM_029263576	LOC105041847	splicing factor 3B subunit 1, transcript variant X1	protein_coding	XP_019704871.1		1024	1276	1414	1055	278224806186807	278318164339024	390121591574698	312750774984563	-0.418	1136	8285	0.2234	nonDE
105041849	XM_010918898,XM_010918899	LOC105041849	fatty-acid-binding protein 2, transcript variant X2	protein_coding	XP_010917200.1		237	123	414	496	643938272131574	268284750891065	114222304746764	147037331177576	-1785	2619	6201	0.04169	downReg
105041850	XM_010918900	LOC105041850	pre-rRNA-processing protein ESF1	protein_coding	XP_010917202.1	.	88	67	122	100	239099442816787	146138848046353	336597129930079	296446232212855	-0.8997	1307	4611	0.1791	nonDE
105041851	XM_010918901,XM_010918903	LOC105041851	UMP-CMP kinase 3, transcript variant X1	protein_coding	XP_010917203.1		134	306	47	153	364083242471017	667440111972894	129672664809129	453562735285669	1011	0.9465	5119	0.2856	nonDE
105041852	XM_010918904,XM_019848840,XM_019848841,XM_019848842,XM_029263578	LOC105041852	protein FIP1, transcript variant X5	protein_coding	XP_010917206.1		131	159	149	79	355932125102263	346807117005523	411089937373621	234192523448156	0.05823	0.061	5051	0.9319	nonDE
105041854	XM_010918910	LOC105041854	probable GTP diphosphokinase RSH2, chloroplastic	protein_coding	XP_010917212.1	.	200	270	214	165	543407824583607	588917745858436	590424473811778	489136283151212	-0.01889	0.02682	5788	0.9684	nonDE
105041858	XM_010918915,XM_029263580,XM_029263581,XM_029263582,XM_029263583	LOC105041858	isoleucine--tRNA ligase, chloroplastic/mitochondrial, transcript variant X5	protein_coding	XP_010917217.1		763	1205	580	402	207310085078646	262831808799783	160021586360201	119171385349568	0.6644	1679	7489	0.1108	nonDE
105041860	XM_010918923	LOC105041860	oryzain gamma chain	protein_coding	XP_010917225.1	.	1707	2972	1168	1394	463798578282109	648245755811582	322250367015026	413246047704721	0.4943	1105	8806	0.2313	nonDE
105041861	XM_010918924	LOC105041861	60S ribosomal protein L27a-3	protein_coding	XP_010917226.1	.	211	251	185	165	573295254935705	547475385964694	510413680631677	489136283151212	0.07016	0.1077	5729	0.8811	nonDE
105041862	XM_010918925	LOC105041862	serine/threonine-protein kinase RIPK	protein_coding	XP_010917227.1	.	353	130	862	717	959114810390066	283552988746654	237825185245679	212551948496617	-2254	2.8	6761	0.03462	downReg
105041888	XM_010918949	LOC105041888	metal tolerance protein 4	protein_coding	XP_010917251.1	.	149	56	150	166	404838829314787	122145902844713	4138489302419	49210074547334	-1223	1356	4992	0.1675	nonDE
105041892	XM_010918953,XM_010918954,XM_010918955	LOC105041892	E3 ubiquitin-protein ligase SINAT2, transcript variant X3	protein_coding	XP_010917255.1		95	121	310	203	258118716677213	26392239721804	855287789166594	601785851392097	-1552	2983	5.44	0.02863	downReg
105041896	XM_010918964	LOC105041896	protein trichome birefringence	protein_coding	XP_010917266.1	.	114	102	162	169	309742460012656	222480037324298	446956844661252	500994132439726	-0.9706	1795	5145	0.09776	nonDE
105041902	XM_010918969	LOC105041902	glutamate decarboxylase	protein_coding	XP_010917271.1	.	2695	2495	2333	2269	73224204362641	544203620709925	643673036169569	672636500890969	-0.1474	0.2639	9332	0.711	nonDE
105041911	XM_010918978,XM_010918980,XM_029263593	LOC105041911	protein NRDE2 homolog, transcript variant X1	protein_coding	XP_010917280.1		266	399	398	274	722732406696197	870289557768578	109807916157518	812262676263224	-0.3415	0.6973	6438	0.3934	nonDE
105041912	XM_010919013,XM_010919084	LOC105041912	uncharacterized LOC105041912, transcript variant X2	protein_coding	XP_010917315.1		283	334	292	225	768922071785804	72851306339525	805625917537566	667004022478925	-0.06509	0.104	6213	0.8851	nonDE
105041914	XM_010918982,XM_019849473	LOC105041914	transmembrane 9 superfamily member 2, transcript variant X1	protein_coding	XP_010917284.1		834	989	806	814	226601062851364	215718389131109	222374825183314	241307233021264	-0.1575	0.3423	7823	0.6399	nonDE
105041920	XM_010918990	LOC105041920	protein Barley B recombinant	protein_coding	XP_010917292.1	.	227	333	212	130	616767880902394	726331886558738	584906488075219	385380101876712	0.3954	0.7189	5.82	0.3807	nonDE
105041928	XM_010918997	LOC105041928	14-3-3-like protein	protein_coding	XP_010917299.1	.	1161	1625	1034	890	315448242170784	354441235933318	285279862580083	263837146669441	0.1947	0.4652	8243	0.5428	nonDE
105041929	XM_010918999,XM_019849384,XM_029263595	LOC105041929	serine/threonine-protein kinase SAPK2, transcript variant X1	protein_coding	XP_010917301.1		590	965	777	690	160305308252164	210483564723478	214373745865304	20454790022687	-0.2741	0.6335	7617	0.4319	nonDE
105041930	XM_010919000	LOC105041930	40S ribosomal protein S6	protein_coding	XP_010917302.1	.	1166	1232	916	829	316806761732243	268720986258368	252723746734387	245753926504457	0.1375	0.2813	8076	0.6948	nonDE
105041931	XM_010919002,XR_003800378,XR_003800379	LOC105041931	F-box protein At1g78280, transcript variant X2	protein_coding	XP_010917304.1	.	794	794	950	891	215732906359692	17318544081911	262104322486537	264133592901654	-0.54	1426	7818	0.1523	nonDE
105041934	XM_010919009	LOC105041934	ras-related protein Rab11D	protein_coding	XP_010917311.1	.	151	271	29	47	410272907560623	591098922694949	800107931801007	139329729140042	2151	2629	4523	0.04095	upReg
105041936	XM_010919012,XM_019849489	LOC105041936	polyadenylate-binding protein 2, transcript variant X1	protein_coding	XP_010917314.1		291	319	250	222	790658384769148	695795410847559	689748217069834	658110635512539	0.04353	0.06668	6146	0.9256	nonDE
105041937	XM_010919014	LOC105041937	phospho-2-dehydro-3-deoxyheptonate aldolase 2, chloroplastic	protein_coding	XP_010917316.1	.	234	335	113	288	63578715476282	730694240231763	311766194115565	853765148773024	0.3391	0.3359	5893	0.6456	nonDE
105041939	XM_019849431	LOC105041939	7-deoxyloganetin glucosyltransferase	protein_coding	XP_019704990.1	.	278	24	110	149	755336876171214	523482440763054	303489215510727	441704885997155	-1206	0.6113	4765	0.4458	nonDE
105041950	XM_019855145	LOC105041950	protein unc-13 homolog	protein_coding	XP_019710704.1	.	450	677	366	474	122266760531312	147665671831912	100979138979024	140515514068894	0.0923	0.1399	6985	0.8428	nonDE
105041953	XM_019849419,XM_019849420	LOC105041953	protein TIFY 3, transcript variant X1	protein_coding	XP_019704978.1		110	122	173	115	298874303520984	266103574054553	477305766212325	340913167044784	-0.6336	1107	5082	0.2306	nonDE
105041956	XM_010919031,XM_010919032	LOC105041956	uncharacterized LOC105041956, transcript variant X1	protein_coding	XP_010917333.1		167	414	130	117	453745533527312	903007210316268	358669072876313	346842091689041	0.7867	1149	5575	0.2197	nonDE
105041957	XM_010919033,XR_003800385,XR_831448	LOC105041957	vacuolar cation/proton exchanger 3, transcript variant X1	protein_coding	XP_010917335.1	.	152	123	313	264	412989946683541	268284750891065	863564767771432	782618053041938	-1437	2.85	5713	0.03285	downReg
105041965	XM_010919047,XM_010919048,XM_010919049,XM_029263601,XM_029263602	LOC105041965	pre-mRNA-splicing factor ATP-dependent RNA helicase DEAH10, transcript variant X1	protein_coding	XP_010917349.1		198	217	170	124	537973746337771	473315373523261	469028787607487	367593327943941	0.1733	0.267	5521	0.7082	nonDE
105041974	XM_029263605,XR_003800387,XR_003800388,XR_003800389,XR_003800390,XR_003800391,XR_003800392,XR_003800393,XR_003800394	LOC105041974	alpha-aminoadipic semialdehyde synthase, transcript variant X9	protein_coding	XP_029119438.1	.	1483	2558	1628	907	402936901928745	557945034779955	449164038955876	26887673261706	0.3564	0.6267	8666	0.4366	nonDE
105041976	XM_010919058,XM_010919059,XM_010919060	LOC105041976	ubiquitin-conjugating enzyme E2 34, transcript variant X3	protein_coding	XP_010917360.1		197	206	127	121	535256707214853	449322428321622	350392094271475	358699940977555	0.3675	0.6405	5387	0.4276	nonDE
105041982	XM_010919065,XM_010919066	LOC105041982	pectinesterase 3, transcript variant X1	protein_coding	XP_010917367.1		92	182	60	137	249967599308459	396974184245316	16553957209676	406131338131612	0.2691	0.2315	4844	0.7436	nonDE
105041983	XM_010919070,XM_010919071,XM_019849285,XM_019849287,XM_019849288	LOC105041983	1-phosphatidylinositol-3-phosphate 5-kinase FAB1B, transcript variant X4	protein_coding	XP_010917372.1		702	657	721	711	190736146428846	143303318158886	19892338580294	21077327110334	-0.4063	0.9182	7525	0.2955	nonDE
105041988	XM_010919080	LOC105041988	FCS-Like Zinc finger 17	protein_coding	XP_010917382.1	.	162	265	53	69	440160337912722	578011861675872	146226622018805	20454790022687	1472	2.31	4892	0.05662	nonDE
105041990	XM_010919081	LOC105041990	AT-rich interactive domain-containing protein 4	protein_coding	XP_010917383.1	.	217	235	253	223	589597489673214	512576556580491	698025195674672	661075097834668	-0.4034	0.8737	5936	0.3106	nonDE
105041992	XM_010919083	LOC105041992	transcription factor bHLH78	protein_coding	XP_010917385.1	.	1061	1095	2124	1822	288277850941603	238838863598143	586010085222531	540125035091823	-1.19	3276	8586	0.02269	downReg
105041997	XM_010919090	LOC105041997	ethylene-responsive transcription factor 1	protein_coding	XP_010917392.1	.	562	647	583	671	152697598707994	141122141322373	160849284220685	198915421814826	-0.3756	0.8701	7341	0.3123	nonDE
105042002	XM_010919097,XM_029263614,XM_029263615	LOC105042002	sucrose synthase 1, transcript variant X3	protein_coding	XP_010917399.1		3795	1990	1858	3821	103111634714739	434054190466032	5126208749263	113272105328532	-0.273	0.2251	9.48	0.75	nonDE
105042003	XM_010919100	LOC105042003	40S ribosomal protein SA	protein_coding	XP_010917402.1	.	477	589	491	327	12960276616319	1284713156706	135466549832515	969379179336037	0.07515	0.1211	6928	0.867	nonDE
105042004	XM_010919101,XM_029263616,XR_003800395,XR_003800396	LOC105042004	phosphoinositide phosphatase SAC3, transcript variant X1	protein_coding	XP_010917403.1		242	286	112	169	657523467746164	62381657524264	309007201247285	500994132439726	0.6291	1108	5654	0.2302	nonDE
105042005	XM_010919102	LOC105042005	RRP12-like protein	protein_coding	XP_010917404.1	.	218	269	246	135	592314528796132	586736569021923	678712245596716	400202413487355	0.07215	0.09019	5796	0.8986	nonDE
105042006	XM_010919103,XM_010919104,XM_010919105,XM_019849595,XM_029263617	LOC105042006	respiratory burst oxidase homolog protein E, transcript variant X2	protein_coding	XP_010917405.1		145	200	287	403	393970672823115	436235367302545	791830953196169	119467831581781	-1.31	2611	5992	0.04227	downReg
105042009	XM_010919106,XM_010919107,XM_010919108	LOC105042009	KH domain-containing protein At4g18375, transcript variant X3	protein_coding	XP_010917408.1		1312	1927	2068	1339	356475532926846	420312776396002	570559725160166	396941504933014	-0.3881	0.8895	8746	0.3049	nonDE
105042013	XM_019849612	LOC105042013	dnaJ homolog subfamily B member 3	protein_coding	XP_019705171.1	.	534	989	315	239	145089889163823	215718389131109	86908275350799	708506494988725	1088	2.5	6882	0.04689	upReg
105042016	XM_010919118	LOC105042016	auxin-responsive protein SAUR76	protein_coding	XP_010917420.1	.	62	17	198	121	168456425620918	370800062207163	546280587919308	358699940977555	-2676	2423	4241	0.05045	nonDE
105042025	XM_010919127,XM_010919128,XM_010919129,XM_010919130,XM_029263621	LOC105042025	uncharacterized LOC105042025, transcript variant X1	protein_coding	XP_010917429.1		649	1028	678	689	17633583907738	224224978793508	187059716469339	204251453994657	-0.06056	0.1059	7624	0.883	nonDE
105042029	XM_010919134	LOC105042029	3-oxoacyl-[acyl-carrier-protein] synthase I, chloroplastic	protein_coding	XP_010917436.1	.	126	111	115	93	342346929487672	242110628852913	317284179852123	275694995957956	-0.1731	0.2022	4873	0.7724	nonDE
105042031	XM_010919135,XM_029263622,XM_029263623	LOC105042031	auxin response factor 16, transcript variant X1	protein_coding	XP_010917437.3		252	289	341	239	684693858975345	630360105752178	940816568083253	708506494988725	-0.4098	0.8704	6197	0.3123	nonDE
105042032	XM_010919137	LOC105042032	20 kDa chaperonin, chloroplastic	protein_coding	XP_010917439.1	.	262	229	180	211	711864250204525	499489495561414	49661871629028	625501549969125	-0.001755	0.001998	5853	0.998	nonDE
105042033	gene-LOC105042033	LOC105042033	.	pseudogene	.	.	82	146	186	131	222797208079279	318451818130858	513172673499956	388344564198841	-0.8101	1454	5114	0.148	nonDE
105042037	XM_010919141	LOC105042037	probable polygalacturonase	protein_coding	XP_010917443.1	.	232	337	187	177	630353076516984	735056593904789	515931666368236	524709831016754	0.3005	0.6079	5898	0.448	nonDE
105042038	XM_029263626	LOC105042038	probable nucleoredoxin 1	protein_coding	XP_029119459.1	.	190	223	222	186	516237433354427	486402434542338	612496416758012	551389991915911	-0.3105	0.6256	5757	0.4371	nonDE
105042042	XM_010919145	LOC105042042	exocyst complex component EXO70A1	protein_coding	XP_010917447.1	.	114	100	114	102	309742460012656	218117683651273	314525186983844	302375156857113	-0.376	0.5135	4.83	0.5105	nonDE
105042047	XM_010919153	LOC105042047	uncharacterized LOC105042047	protein_coding	XP_010917455.2	.	94	164	113	93	255401677554295	357713001188087	311766194115565	275694995957956	-0.02209	0.02333	4902	0.9738	nonDE
105042050	XM_010919155,XM_019849564,XM_029263629,XR_003800398	LOC105042050	ATP-dependent DNA helicase Q-like 3, transcript variant X3	protein_coding	XP_010917457.1		123	170	58	53	334195812118918	370800062207163	160021586360201	157116503072813	1059	1.69	4571	0.1102	nonDE
105042051	XM_010919157	LOC105042051	uncharacterized LOC105042051	protein_coding	XP_010917459.1	.	187	166	778	552	508086315985672	362075354861112	214649645152132	163638320181496	-2241	4336	6489	0.01447	downReg
105042052	XM_010919158	LOC105042052	polyadenylate-binding protein-interacting protein 7	protein_coding	XP_010917460.1	.	206	229	218	195	559710059321115	499489495561414	601460445284895	578070152815068	-0.2548	0.4862	5807	0.5263	nonDE
105042074	XM_019849576,XM_019849577,XM_019849578,XM_019849579	LOC105042074	proline--tRNA ligase, cytoplasmic, transcript variant X4	protein_coding	XP_019705135.1		868	1137	646	509	235838995869285	247999806311497	178230939290845	150891132196343	0.4682	1308	7639	0.1789	nonDE
105042084	XM_010919179	LOC105042084	cytochrome P450 71A1	protein_coding	XP_010917481.1	.	518	271	830	806	140742626567154	591098922694949	228996408067185	238935663163562	-1473	2.31	7192	0.05662	nonDE
105042090	XM_010919185,XM_029263634	LOC105042090	aldehyde dehydrogenase family 7 member A1, transcript variant X2	protein_coding	XP_010917487.1		1009	1286	1018	824	27414924750243	280499341175537	280865473990836	244271695343393	-0.008476	0.01493	8075	0.9824	nonDE
105042091	XM_010919186,XM_010919187,XM_010919188,XM_010919189	LOC105042091	mitochondrial pyruvate carrier 1, transcript variant X2	protein_coding	XP_010917488.1		166	111	109	128	451028494404394	242110628852913	300730222642447	379451177232455	-0.1734	0.1728	5068	0.8037	nonDE
105042097	XM_010919195	LOC105042097	phosphoglucomutase, cytoplasmic 2	protein_coding	XP_010917497.1	.	867	908	496	542	235567291956994	198050856755355	136846046266655	160673857859368	0.4517	1084	7485	0.2369	nonDE
105042098	XM_010919196,XM_029263635	LOC105042098	asparagine synthetase [glutamine-hydrolyzing] 2, transcript variant X2	protein_coding	XP_010917498.1		829	1070	1016	937	225242543289905	233385921506862	28031367541718	277770119583446	-0.3736	1059	7983	0.2447	nonDE
105042102	XM_010919200,XM_029263636,XM_029263637,XM_029263638,XM_029263639,XM_029263640,XM_029263641,XM_029263642,XM_029263643,XM_029263644	LOC105042102	uncharacterized LOC105042102, transcript variant X2	protein_coding	XP_010917502.1		2149	2786	3564	2980	583891707515086	607675866652445	983305058254755	883409771994309	-0.7357	2.22	9542	0.06192	nonDE
105042108	XM_010919208	LOC105042108	dihydropyrimidine dehydrogenase (NADP(+)), chloroplastic	protein_coding	XP_010917510.1	.	136	154	108	92	369517320716853	33590123282296	297971229774168	272730533635827	0.1987	0.2738	4992	0.7007	nonDE
105042109	XM_010919209,XM_019849452,XR_831474	LOC105042109	alpha,alpha-trehalose-phosphate synthase [UDP-forming] 6, transcript variant X3	protein_coding	XP_010917511.1		167	169	291	214	453745533527312	368618885370651	802866924669286	634394936935511	-0.9121	2019	5759	0.07653	nonDE
105042111	XM_010919211,XM_010919212,XM_019848811	LOC105042111	protein trichome birefringence-like 14, transcript variant X3	protein_coding	XP_010917513.1		151	179	226	185	410272907560623	390430653735778	62353238823113	548425529593783	-0.645	1467	5.6	0.1456	nonDE
105042112	XM_010919213,XM_010919216,XM_019849368,XM_019849369,XM_019849370	LOC105042112	probable RNA-dependent RNA polymerase 1, transcript variant X1	protein_coding	XP_010917515.1		996	1203	2337	1247	270617096642636	262395573432481	644776633316881	369668451569431	-0.9625	2118	8495	0.06924	nonDE
105042113	XM_010919217,XM_029263646	LOC105042113	two-component response regulator ORR21, transcript variant X1	protein_coding	XP_010917519.1		274	608	401	250	744468719679542	132615551659974	110635614018001	741115580532139	0.05577	0.0623	6.57	0.9308	nonDE
105042116	XM_010919218	LOC105042116	uncharacterized LOC105042116	protein_coding	XP_010917520.1	.	238	433	159	164	646655311254492	94444957021001	438679866056414	486171820829083	0.6792	1386	5912	0.1609	nonDE
105042124	XM_019848861,XM_029263649	LOC105042124	ubiquitin-like modifier-activating enzyme 5, transcript variant X2	protein_coding	XP_019704420.1		245	282	195	208	665674585114919	615091867896589	53800360931447	616608163002739	0.0609	0.09114	5927	0.8975	nonDE
105042126	XM_019849262,XR_002164267,XR_002164268	LOC105042126	splicing factor-like protein 1, transcript variant X1	protein_coding	XP_019704821.1	.	238	233	248	154	646655311254492	508214202907465	684230231333275	456527197607797	-0.07363	0.09377	5826	0.8954	nonDE
105042129	XM_010919230,XM_029263650	LOC105042129	uncharacterized LOC105042129, transcript variant X2	protein_coding	XP_010917532.1		680	1132	977	640	184758660358426	246909217893241	269553603230891	189725588616228	-0.1723	0.3057	7781	0.6725	nonDE
105042133	XM_010919233	LOC105042133	6-phosphogluconate dehydrogenase, decarboxylating 3, chloroplastic	protein_coding	XP_010917535.1	.	411	697	369	223	111670307951931	152028025504937	101806836839507	661075097834668	0.5795	1171	6694	0.2126	nonDE
105042136	XM_010919275	LOC105042136	protein YIPF1 homolog	protein_coding	XP_010917577.1	.	291	230	470	408	790658384769148	501670672397927	129672664809129	120950062742845	-1097	2317	6475	0.05655	nonDE
105042139	XM_010919245,XM_010919246,XM_029263651	LOC105042139	uncharacterized LOC105042139, transcript variant X2	protein_coding	XP_010917547.1		150	202	170	140	407555868437705	440597720975571	469028787607487	415024725097998	-0.1496	0.2386	5439	0.7354	nonDE
105042142	XM_010919250,XM_029263655,XM_029263656	LOC105042142	SUMO-activating enzyme subunit 1B-1, transcript variant X3	protein_coding	XP_010917552.1		146	158	92	57	396687711946033	344625940169011	253827343881699	168974352361328	0.7102	1077	4798	0.239	nonDE
105042163	XM_029263774	LOC105042163	phospholipid-transporting ATPase 3	protein_coding	XP_029119607.1	.	606	821	801	575	164652570848833	179074618277695	220995328749175	170456583522392	-0.2685	0.6157	7513	0.4431	nonDE
105042164	XM_010919273,XM_010919274,XM_010919276,XM_019848832	LOC105042164	protein WRKY1, transcript variant X3	protein_coding	XP_010917575.1		273	383	471	306	741751680556623	835390728384374	129948564095957	907125470571338	-0.556	1248	6533	0.193	nonDE
105042165	XM_010919280,XM_010919287,XM_029264811,XR_831484	LOC105042165	uncharacterized LOC105042165, transcript variant X2	protein_coding	XP_010917582.1		116	130	58	81	315176538258492	283552988746654	160021586360201	240121448092413	0.5175	0.6734	4606	0.4071	nonDE
105042175	XM_010919291,XM_029263669,XR_003800406	LOC105042175	magnesium transporter MRS2-I, transcript variant X2	protein_coding	XP_010917593.1		190	196	239	243	516237433354427	427510659956494	659399295518761	720364344277239	-0.6527	1463	5834	0.1468	nonDE
105042176	XM_010919292,XM_019849623,XM_019849625,XM_019849626,XM_019849627,XM_029263668	LOC105042176	glutathione reductase, chloroplastic, transcript variant X1	protein_coding	XP_010917594.1		75	94	110	112	203777934218853	205030622632196	303489215510727	332019780078398	-0.7212	1185	4678	0.2085	nonDE
105042195	XM_019849533,XM_019849534,XM_029263684	LOC105042195	heat stress transcription factor A-2c, transcript variant X1	protein_coding	XP_019705092.1		87	115	124	138	236382403693869	250835336198963	342115115666638	409095800453741	-0.6972	1226	4922	0.1984	nonDE
105042197	XM_010919316	LOC105042197	probable aldo-keto reductase 1	protein_coding	XP_010917618.1	.	291	434	165	108	790658384769148	946630747046523	45523382326609	320161930789884	1077	2321	5849	0.05639	nonDE
105042198	XM_010919317	LOC105042198	perakine reductase	protein_coding	XP_010917619.1	.	678	1049	144	529	184215252533843	228805450150185	397294973032224	156820056840601	1305	1394	6994	0.1596	nonDE
105042199	XM_010919318	LOC105042199	transmembrane emp24 domain-containing protein p24beta3	protein_coding	XP_010917620.1	.	202	248	128	169	548841902829443	540931855455156	353151087139755	500994132439726	0.294	0.4764	5585	0.5343	nonDE
105042201	XM_010919321,XM_029263682,XM_029263683	LOC105042201	protein SPIRRIG, transcript variant X2	protein_coding	XP_010917623.1		2577	2858	3870	4234	700180981975977	623380339875337	10677302400241	125515334718923	-0.8987	2.44	9773	0.04959	downReg
105042203	XM_010919323	LOC105042203	stem-specific protein TSJT1	protein_coding	XP_010917625.1	.	129	182	51	91	350498046856426	396974184245316	140708636282246	269766071313698	0.8755	1214	4761	0.2005	nonDE
105042204	XM_010919324,XM_010919325	LOC105042204	uncharacterized LOC105042204, transcript variant X1	protein_coding	XP_010917626.1		251	419	317	249	681976819852427	913913094498832	874600739244549	73815111821001	-0.1113	0.18	6318	0.7963	nonDE
105042205	XM_029263678,XM_029263679,XM_029263680,XM_029263681	LOC105042205	protein argonaute 10, transcript variant X4	protein_coding	XP_029119511.1		138	193	111	91	374951398962689	420967129446956	306248208379006	269766071313698	0.3755	0.621	5084	0.4396	nonDE
105042206	XM_010919328	LOC105042206	calmodulin	protein_coding	XP_010917630.2	.	754	336	1183	1137	20486474986802	732875417068276	326388856317445	337059366026017	-1557	2156	7656	0.06672	nonDE
105042208	XM_010919330	LOC105042208	ADP-ribosylation factor-like protein 5	protein_coding	XP_010917632.1	.	160	267	95	112	434726259666886	582374215348898	262104322486537	332019780078398	0.7009	1241	5273	0.1946	nonDE
105042209	XM_010919331,XM_029263675,XM_029263676	LOC105042209	uncharacterized LOC105042209, transcript variant X1	protein_coding	XP_010917633.1		157	147	52	102	426575142298131	320632994967371	143467629150525	302375156857113	0.7382	0.883	4802	0.3073	nonDE
105042211	XM_010919333,XM_010919334	LOC105042211	probable histone H2A variant 3, transcript variant X1	protein_coding	XP_010917635.1		480	1047	409	379	130417877900066	228369214782882	112842808312625	112353122008672	0.5384	1014	7125	0.2615	nonDE
105042213	XM_010919335	LOC105042213	uncharacterized LOC105042213	protein_coding	XP_010917637.1	.	263	581	178	134	714581289327443	126726374201389	491100730553722	397237951165226	1024	1.84	6022	0.09262	nonDE
105042220	XM_029263677	LOC105042220	ATP sulfurylase 1, chloroplastic	protein_coding	XP_029119510.1	.	106	251	126	172	288006147029312	547475385964694	347633101403196	509887519406111	-0.1152	0.1153	5358	0.8731	nonDE
105042227	XM_010919347	LOC105042227	mediator of RNA polymerase II transcription subunit 23	protein_coding	XP_010917649.1	.	2292	3352	3691	2209	622745366972813	731130475599066	10183442676819	654849726958198	-0.365	0.7458	9536	0.3676	nonDE
105042239	XM_010919364,XM_029263695	LOC105042239	GTPase HflX, transcript variant X1	protein_coding	XP_010917666.1		158	178	124	74	429292181421049	388249476899265	342115115666638	219370211837513	0.4545	0.6883	5.07	0.3988	nonDE
105042241	XM_010919365,XM_010919366,XM_029263696,XM_029263697	LOC105042241	serine/threonine-protein phosphatase 4 regulatory subunit 2, transcript variant X4	protein_coding	XP_010917667.1		270	320	190	131	733600563187869	697976587684072	524208644973074	388344564198841	0.5621	1.2	5832	0.2044	nonDE
105042243	XM_010919369,XM_010919370,XM_010919375,XM_029263698,XM_029263699,XM_029263700,XM_029263701,XM_029263702,XM_029263703,XM_029263704,XM_029263705,XM_029263706	LOC105042243	BEL1-like homeodomain protein 7, transcript variant X10	protein_coding	XP_010917671.1		384	822	798	731	104334302320053	179292735961346	220167630888691	216702195747597	-0.751	1632	7434	0.1181	nonDE
105042244	XM_010919376	LOC105042244	probable lactoylglutathione lyase, chloroplastic	protein_coding	XP_010917678.1	.	139	165	66	76	377668438085607	3598941780246	182093529306436	22529913648177	0.7714	1.25	4.78	0.1927	nonDE
105042245	XM_010919379	LOC105042245	folate transporter 1, chloroplastic	protein_coding	XP_010917681.1	.	102	133	76	64	27713799053764	290096519256193	209683457989229	189725588616228	0.4109	0.5638	4.58	0.4751	nonDE
105042247	XM_010919381	LOC105042247	probable ubiquitin-conjugating enzyme E2 16	protein_coding	XP_010917683.1	.	92	81	108	123	249967599308459	176675323757531	297971229774168	364628865621812	-0.7653	1152	4725	0.2187	nonDE
105042251	XM_010919384	LOC105042251	beta-galactosidase 5	protein_coding	XP_010917686.1	.	1204	3450	410	1046	327131510399331	75250600859689	113118707599453	310082758894647	1322	1454	8253	0.148	nonDE
105042263	XM_010919397	LOC105042263	chloroplastic import inner membrane translocase subunit TIM22-2	protein_coding	XP_010917699.2	.	328	295	120	106	891188832317115	643447166771254	33107914419352	314233006145627	1128	2139	5631	0.06788	nonDE
105042268	XM_010919400	LOC105042268	uncharacterized LOC105042268	protein_coding	XP_010917702.2	.	529	613	855	699	143731369602364	13370614007823	235893890237883	207215916316786	-0.7674	2225	7453	0.06161	nonDE
105042270	XM_010919401,XM_010919402,XM_010919403	LOC105042270	probable ubiquitin-like-specific protease 2B, transcript variant X3	protein_coding	XP_010917703.1		194	244	197	161	527105589846099	532207148109105	543521595051029	477278433862697	-0.03834	0.05606	5702	0.9366	nonDE
105042274	XM_010919410	LOC105042274	pentatricopeptide repeat-containing protein At3g02650, mitochondrial-like	protein_coding	XP_010917712.1	.	118	76	103	77	320610616504328	165769439574967	284176265432771	228263598803899	-0.3117	0.3087	4607	0.6704	nonDE
105042281	XM_019848807	LOC105042281	putative disease resistance protein RGA1	protein_coding	XP_019704366.1	.	137	195	280	197	372234359839771	425329483119982	772518003118214	583999077459325	-0.842	1.89	5696	0.08869	nonDE
105042282	XM_010919418,XM_019849379	LOC105042282	YTH domain-containing protein ECT4, transcript variant X1	protein_coding	XP_010917720.1		790	747	996	698	214646090710525	162933909687501	274795689680622	206919470084573	-0.4495	0.9919	7723	0.2687	nonDE
105042283	XM_010919419	LOC105042283	probable serine/threonine-protein kinase PBL16	protein_coding	XP_010917721.1	.	156	189	146	121	423858103175213	412242422100905	402812958768783	358699940977555	0.03779	0.04979	5322	0.9438	nonDE
105042286	XM_019849409,XM_029263726	LOC105042286	myosin-12, transcript variant X2	protein_coding	XP_019704968.1		987	775	877	1360	26817176143201	169041204829736	241963674548098	403166875809483	-0.6499	1049	8011	0.2486	nonDE
105042287	XM_010919421	LOC105042287	cysteine synthase	protein_coding	XP_010917723.1	.	1577	2113	1018	946	428477069684174	460882665555139	280865473990836	280438135673361	0.5724	1741	8465	0.1041	nonDE
105042289	XM_010919427,XM_029264775	LOC105042289	protein NINJA homolog 1, transcript variant X1	protein_coding	XP_010917729.1		178	214	244	157	48363296387941	466771843013723	673194259860158	465420584574183	-0.3383	0.6062	5692	0.4492	nonDE
105042290	XM_010919426,XM_010919428,XM_010919430,XM_029263724	LOC105042290	5'-3' exoribonuclease 4, transcript variant X4	protein_coding	XP_010917728.1		441	637	571	527	119821425320685	138940964485861	15753849277875	156227164376175	-0.3688	0.9421	7154	0.2866	nonDE
105042291	XM_010919431,XM_019849366	LOC105042291	uncharacterized LOC105042291, transcript variant X1	protein_coding	XP_010917733.1		114	88	144	92	309742460012656	19194356161312	397294973032224	272730533635827	-0.5889	0.7841	4831	0.3494	nonDE
105042299	XM_010919443	LOC105042299	E3 ubiquitin ligase PQT3-like	protein_coding	XP_010917745.1	.	209	317	283	189	567861176689869	691433057174534	780794981723052	560283378882297	-0.1689	0.2742	6012	0.7003	nonDE
105042301	XM_010919445,XM_010919446,XM_010919447,XM_010919448,XM_029263722	LOC105042301	protein OBERON 1, transcript variant X4	protein_coding	XP_010917747.1		269	486	245	189	730883524064951	106005194254518	675953252728437	560283378882297	0.4307	0.8495	6204	0.3215	nonDE
105042303	XM_010919451	LOC105042303	serine/threonine-protein kinase EDR1	protein_coding	XP_010917753.1	.	498	923	941	693	135308548321318	201322622010125	259621228905085	205437238923509	-0.5671	1308	7.61	0.1789	nonDE
105042310	XM_010919462	LOC105042310	FCS-Like Zinc finger 8	protein_coding	XP_010917764.1	.	169	246	82	50	459179611773148	536569501782131	226237415198905	148223116106428	1.33	2209	4922	0.06283	nonDE
105042322	XM_010919479,XM_010919481,XM_010919482,XM_010919483,XM_010919485,XM_010919486,XM_019849565,XM_019849566,XM_019849567,XM_019849568,XM_019849569,XM_019849570,XM_019849571,XM_019849572,XM_019849573,XM_019849574,XM_029263712	LOC105042322	protein RDM1, transcript variant X9	protein_coding	XP_010917781.1		169	258	156	123	459179611773148	562743623820283	430402887451576	364628865621812	0.2703	0.466	5492	0.5422	nonDE
105042323	XM_010919487	LOC105042323	homocysteine S-methyltransferase 2	protein_coding	XP_010917789.1	.	148	135	30	44	402121790191869	294458872929218	8276978604838	130436342173656	1606	1943	4254	0.08327	nonDE
105042325	XM_019849615,XM_019849616,XM_019849619,XM_029263710,XM_029263711	LOC105042325	protein NETWORKED 1D, transcript variant X2	protein_coding	XP_019705174.1		119	148	114	64	323327655627246	322814171803883	314525186983844	189725588616228	0.2854	0.3537	4819	0.6315	nonDE
105042326	XM_010919492,XM_010919498,XM_010919507,XM_010919514,XM_010919520,XM_019848056	LOC105042326	uncharacterized LOC105042326, transcript variant X2	protein_coding	XP_010917794.2		283	717	249	177	768922071785804	156390379177962	686989224201554	524709831016754	0.7928	1259	6345	0.1909	nonDE
105042361	XM_010919529	LOC105042361	ETO1-like protein 1	protein_coding	XP_010917831.2	.	149	175	142	131	404838829314787	381705946389727	391776987295666	388344564198841	-0.08604	0.1201	5296	0.868	nonDE
105042368	XM_010919539	LOC105042368	protein RRP6-like 2	protein_coding	XP_010917841.1	.	113	185	138	116	307025420889738	403517714754854	380741015822548	343877629366912	-0.113	0.1495	5163	0.8318	nonDE
105042370	XM_010919542,XM_010919543,XM_010919547	LOC105042370	FH protein interacting protein FIP2, transcript variant X1	protein_coding	XP_010917844.1		93	161	133	77	252684638431377	351169470678549	366946051481152	228263598803899	-0.04068	0.03975	4883	0.9542	nonDE
105042371	XM_010919549	LOC105042371	ABC transporter E family member 2	protein_coding	XP_010917851.1	.	802	1046	630	433	217906537658026	228151097099231	173816550701598	128361218548166	0.4839	1232	7513	0.1975	nonDE
105042372	XM_010919548	LOC105042372	5-methyltetrahydropteroyltriglutamate--homocysteine methyltransferase 1	protein_coding	XP_010917850.1	.	1654	2219	1053	1010	449398270930643	484003140022174	290521949029814	299410694534984	0.5704	1721	8535	0.1058	nonDE
105042378	XM_010919554,XM_010919555,XM_019849375,XM_019849377,XM_029263732	LOC105042378	helicase sen1, transcript variant X3	protein_coding	XP_010917856.1		526	761	733	621	142916257865489	165987557258618	202234177244875	184093110204183	-0.413	1116	7431	0.2287	nonDE
105042383	XM_010919562	LOC105042383	glutamate-rich WD repeat-containing protein 1	protein_coding	XP_010917864.1	.	276	299	330	215	749902797925378	652171874117305	91046764653218	637359399257639	-0.2225	0.378	6192	0.6121	nonDE
105042389	XM_010919571	LOC105042389	probable ubiquitin-conjugating enzyme E2 24	protein_coding	XP_010917873.2	.	1133	1644	1546	1194	307840532626613	358585471922692	426540297435985	353956801262149	-0.3162	0.806	8.49	0.3395	nonDE
105042390	XM_010919567,XM_010919569,XM_010919572,XM_019848954,XM_019848955,XM_019848956	LOC105042390	beta-glucosidase BoGH3B, transcript variant X1	protein_coding	XP_010917869.1		206	323	113	454	559710059321115	70452011819361	311766194115565	134586589424636	-0.1021	0.06137	5998	0.9316	nonDE
105042394	XM_010919578	LOC105042394	serine/threonine-protein kinase TOUSLED	protein_coding	XP_010917880.1	.	424	461	373	307	115202458811725	100552252163237	102910433986819	910089932893466	0.0562	0.09136	6675	0.8972	nonDE
105042399	XM_010919585,XM_010919587,XM_010919589,XM_010919591,XM_019849334,XM_019849335,XM_019849336,XM_019849337,XM_019849338,XM_029263738,XR_002164288,XR_002164289	LOC105042399	ubiquitin carboxyl-terminal hydrolase 12, transcript variant X4	protein_coding	XP_010917887.1		4048	5519	3841	3704	109985743695722	120379149607137	105972916070609	109803684411642	0.002172	0.003627	10.12	0.9966	nonDE
105042403	XM_010919596	LOC105042403	myosin-binding protein 7	protein_coding	XP_010917898.1	.	84	220	68	103	228231286325115	4798589040328	187611515042995	305339619179241	0.4625	0.4554	4822	0.5499	nonDE
105042406	XM_010919636,XM_019851480	LOC105042406	carbon catabolite repressor protein 4 homolog 6, transcript variant X1	protein_coding	XP_010917938.1		77	91	120	94	209212012464689	198487092122658	33107914419352	278659458280084	-0.6795	1084	4645	0.2369	nonDE
105042411	XM_010919604,XM_010919605	LOC105042411	prolycopene isomerase 1, chloroplastic, transcript variant X2	protein_coding	XP_010917906.1		230	300	143	78	624918998271148	654353050953818	394535980163945	231228061126027	0.9662	1791	5463	0.09814	nonDE
105042417	XM_029263742,XR_003800439,XR_003800440,XR_831519	LOC105042417	E3 ubiquitin-protein ligase RHF2A, transcript variant X3	protein_coding	XP_029119575.1	.	1053	1585	1196	859	286104219643269	345716528587267	329975547046208	254647313470843	0.02667	0.04412	8239	0.9497	nonDE
105042418	XM_010919615	LOC105042418	sialyltransferase-like protein 5	protein_coding	XP_010917917.1	.	206	356	139	130	559710059321115	77649895379853	383500008690827	385380101876712	0.6952	1416	5658	0.1546	nonDE
105042420	XM_010919618,XM_010919619,XM_010919620,XM_029263744	LOC105042420	replication factor C subunit 1, transcript variant X1	protein_coding	XP_010917920.1		548	576	629	477	148893743935908	125635785783133	17354065141477	141404852765532	-0.294	0.6403	7195	0.4276	nonDE
105042421	XM_010919622	LOC105042421	protein WVD2-like 4	protein_coding	XP_010917924.1	.	1125	1450	1074	1144	305666901328279	316270641294345	296315834053201	339134489651507	-0.1183	0.2419	8295	0.7323	nonDE
105042425	XM_019849324,XM_019849325,XM_019849326,XM_019849327,XM_019849328,XM_019849329,XM_019849330,XM_029263735,XM_029263736	LOC105042425	beta-glucosidase BoGH3B, transcript variant X9	protein_coding	XP_019704883.1		230	462	133	476	624918998271148	100770369846888	366946051481152	141108406533319	0.08027	0.04976	6243	0.9438	nonDE
105042430	XM_010919637,XM_029264741	LOC105042430	MACPF domain-containing protein NSL1, transcript variant X1	protein_coding	XP_010917939.1		793	719	1767	1062	2154612024474	156826614545265	487514039824958	314825898610053	-1189	2564	8069	0.04397	downReg
105042431	XM_010919632,XM_019849299,XM_019849300,XM_029263745	LOC105042431	nuclear pore complex protein NUP1, transcript variant X3	protein_coding	XP_010917934.1		134	165	175	131	364083242471017	3598941780246	482823751948884	388344564198841	-0.3599	0.6487	5312	0.4224	nonDE
105042433	XM_010919643,XM_029263746,XM_029263747	LOC105042433	ubiquitin carboxyl-terminal hydrolase 8, transcript variant X2	protein_coding	XP_010917945.1		110	83	107	117	298874303520984	181037677430556	295212236905889	346842091689041	-0.5944	0.8039	4777	0.3407	nonDE
105042434	XM_010919645,XR_002164106,XR_002164107,XR_002164108,XR_002164109,XR_831521	LOC105042434	uncharacterized LOC105042434, transcript variant X2	protein_coding	XP_010917947.1	.	150	183	221	151	407555868437705	399155361081829	609737423889733	447633810641412	-0.4745	0.9278	5525	0.2924	nonDE
105042440	XM_010919657,XM_010919658	LOC105042440	uncharacterized LOC105042440, transcript variant X1	protein_coding	XP_010917959.1		154	295	303	188	418424024929377	643447166771254	835974839088638	557318916560168	-0.4736	0.8032	5898	0.3408	nonDE
105042442	XM_010919661,XM_010919662,XM_010919663,XM_019849274,XM_029263749	LOC105042442	chromatin modification-related protein EAF1 B, transcript variant X1	protein_coding	XP_010917963.1		499	594	748	617	13558025223361	129561904088856	206372666547294	182907325275332	-0.6452	1851	7327	0.09203	nonDE
105042446	XM_010919665,XM_010919666,XM_010919668,XM_010919669,XM_029263750	LOC105042446	target of rapamycin complex subunit LST8, transcript variant X2	protein_coding	XP_010917967.1		276	408	157	155	749902797925378	889920149297192	433161880319856	459491659929926	0.7867	1866	5919	0.09079	nonDE
105042454	XM_010919678,XM_010919679,XR_003800506	LOC105042454	filament-like plant protein 4, transcript variant X3	protein_coding	XP_010917980.1		692	1428	216	398	188019107305928	311472052254017	595942459548336	117985600420716	1446	2312	7156	0.05662	nonDE
105042456	XM_010919685,XM_029264737,XR_003800958	LOC105042456	uncharacterized LOC105042456, transcript variant X3	protein_coding	XP_010917987.1		411	671	398	451	111670307951931	146356965730004	109807916157518	133697250727998	-0.003341	0.004692	6961	0.9948	nonDE
105042460	XM_010919686	LOC105042460	guanine nucleotide-binding protein-like NSN1	protein_coding	XP_010917988.1	.	843	901	682	668	22904639806199	196524032969797	188163313616651	198026083118187	0.04427	0.07634	7662	0.9134	nonDE
105042470	XM_010919697,XM_010919698,XM_010919699,XM_010919700,XM_010919702,XR_003800507,XR_003800508,XR_831531	LOC105042470	cyclin-H1-1, transcript variant X1	protein_coding	XP_010917999.1		110	142	61	109	298874303520984	309727110784807	168298564965039	323126393112012	0.3188	0.3487	4743	0.6356	nonDE
105042474	XM_010919705	LOC105042474	DEAD-box ATP-dependent RNA helicase 38	protein_coding	XP_010918007.1	.	121	180	61	98	328761733873082	392611830572291	168298564965039	290517307568598	0.6416	0.8893	4824	0.3049	nonDE
105042475	XM_010919706,XM_010919707,XM_029263823,XR_003800510,XR_003800511	LOC105042475	BTB/POZ and MATH domain-containing protein 4, transcript variant X1	protein_coding	XP_010918008.1		217	372	167	190	589597489673214	811397783182734	460751809002649	563247841204425	0.363	0.6572	5895	0.4168	nonDE
105042476	XM_010919712	LOC105042476	UPF0678 fatty acid-binding protein-like protein At1g79260	protein_coding	XP_010918014.1	.	378	403	301	166	102704078846302	879014265114628	83045685335208	49210074547334	0.4648	0.8264	6287	0.3312	nonDE
105042485	XM_010919720,XM_010919729	LOC105042485	60S ribosomal protein L37a-1, transcript variant X2	protein_coding	XP_010918022.1		1157	1828	870	631	314361426521617	398719125714526	240032379540302	187057572526312	0.647	1725	8098	0.1054	nonDE
105042496	XM_010919741,XM_010919747,XM_010919755,XM_029264710	LOC105042496	YTH domain-containing protein ECT4, transcript variant X3	protein_coding	XP_010918043.1		257	305	525	555	698279054589935	665258935136381	144847125584665	164527658878135	-1269	3246	6682	0.02353	downReg
105042497	XM_010919738	LOC105042497	protein TIC110, chloroplastic	protein_coding	XP_010918040.1	.	850	936	1036	928	230948325448033	204158151897591	285831661153739	27510210349353	-0.4611	1289	7948	0.1831	nonDE
105042502	XM_010919746	LOC105042502	uncharacterized LOC105042502	protein_coding	XP_010918048.1	.	147	28	54	107	399404751068951	610729514223563	148985614887084	317197468467755	-0.7078	0.377	4216	0.6126	nonDE
105042507	XM_010919751	LOC105042507	ubiquinol oxidase 2, mitochondrial	protein_coding	XP_010918053.2	.	295	341	415	301	80152654126082	743781301250839	114498204033592	892303158960695	-0.4838	1124	6467	0.2268	nonDE
105042510	XM_010919763	LOC105042510	3-isopropylmalate dehydratase large subunit, chloroplastic	protein_coding	XP_010918065.1	.	548	581	566	472	148893743935908	126726374201389	15615899634461	139922621604468	-0.2028	0.4191	7156	0.5776	nonDE
105042511	XM_010919765	LOC105042511	3-isopropylmalate dehydratase large subunit, chloroplastic-like	protein_coding	XP_010918067.2	.	142	145	157	84	385819555454361	316270641294345	433161880319856	249014835058799	-0.04687	0.0474	5088	0.946	nonDE
105042513	XM_019850224,XM_029263838	LOC105042513	protein ENHANCED DISEASE RESISTANCE 2, transcript variant X1	protein_coding	XP_019705783.1		529	571	569	450	143731369602364	124545197364877	156986694205094	133400804495785	-0.2103	0.4348	7122	0.5664	nonDE
105042516	XM_010919772,XM_010919773	LOC105042516	GPCR-type G protein COLD1, transcript variant X1	protein_coding	XP_010918074.1		121	159	82	122	328761733873082	346807117005523	226237415198905	361664403299684	0.17	0.1957	4964	0.7794	nonDE
105042519	XM_010919775,XM_010919776,XM_019850052	LOC105042519	cyclin-dependent kinase F-4, transcript variant X1	protein_coding	XP_010918077.1		122	227	221	204	331478772996	495127141888389	609737423889733	604750313714225	-0.6476	1322	5636	0.1762	nonDE
105042521	XM_010919777,XM_010919778	LOC105042521	probable methyltransferase PMT21, transcript variant X2	protein_coding	XP_010918079.1		1907	2624	2525	4903	518139360740469	572340801900939	696645699240532	145347587653963	-0.9798	1652	9532	0.1147	nonDE
105042523	XM_010919780	LOC105042523	uncharacterized LOC105042523	protein_coding	XP_010918082.1	.	190	220	368	450	516237433354427	4798589040328	10153093755268	133400804495785	-1316	2962	6253	0.02921	downReg
105042532	XM_010919789	LOC105042532	60S ribosomal protein L13-1	protein_coding	XP_010918091.1	.	956	1162	708	531	259748940150964	253452748402779	195336695074177	157412949305026	0.4562	1.23	7.73	0.1981	nonDE
105042534	XM_010919794	LOC105042534	urea-proton symporter DUR3	protein_coding	XP_010918096.1	.	188	245	132	74	510803355108591	534388324945618	364187058612872	219370211837513	0.7718	1.36	5.27	0.1667	nonDE
105042538	XM_010919800,XM_010919801	LOC105042538	myb family transcription factor PHL11, transcript variant X2	protein_coding	XP_010918102.1		153	230	234	139	415706985806459	501670672397927	645604331177364	412060262775869	-0.2685	0.4157	5605	0.5813	nonDE
105042540	XM_010919802	LOC105042540	cell division cycle 20.2, cofactor of APC complex	protein_coding	XP_010918104.1	.	41	163	42	107	111398604039639	355531824351574	115877700467732	317197468467755	0.1142	0.06043	4299	0.9323	nonDE
105042541	XM_010919803	LOC105042541	cyclin-dependent kinase E-1	protein_coding	XP_010918105.1	.	192	243	162	142	521671511600263	530025971272592	446956844661252	420953649742255	0.1841	0.3166	5582	0.6634	nonDE
105042542	XM_010919805	LOC105042542	WEB family protein At5g55860	protein_coding	XP_010918107.1	.	182	308	160	157	494501120371082	67180246564592	441438858924694	465420584574183	0.2683	0.462	5679	0.5456	nonDE
105042545	XM_010919808,XM_010919810,XM_010919812,XM_019849667,XM_029263849	LOC105042545	single-stranded DNA-binding protein, mitochondrial, transcript variant X3	protein_coding	XP_010918110.1		173	146	59	72	47004776826482	318451818130858	162780579228481	213441287193256	0.9366	1281	4755	0.1851	nonDE
105042551	XM_010919819	LOC105042551	CSC1-like protein At4g35870	protein_coding	XP_010918121.2	.	153	191	151	134	415706985806459	416604775773931	416607923110179	397237951165226	-0.06129	0.0857	5367	0.9038	nonDE
105042555	XM_019849390	LOC105042555	cytochrome b561 and DOMON domain-containing protein At3g61750	protein_coding	XP_019704949.1	.	160	297	42	156	434726259666886	647809520444279	115877700467732	462456122252055	1176	1156	5138	0.2173	nonDE
105042556	XM_010919829	LOC105042556	mannose-P-dolichol utilization defect 1 protein homolog 2	protein_coding	XP_010918131.1	.	238	326	122	155	646655311254492	711063648703149	336597129930079	459491659929926	0.7092	1455	5694	0.148	nonDE
105042560	XM_010919834	LOC105042560	aconitate hydratase, cytoplasmic	protein_coding	XP_010918136.1	.	3573	3457	4077	3863	970798078618614	754032832382449	112484139239748	114517179503826	-0.4952	1208	9945	0.202	nonDE
105042568	XM_010919849	LOC105042568	24-methylenesterol C-methyltransferase 2	protein_coding	XP_010918151.1	.	240	314	163	177	652089389500328	684889526664996	449715837529532	524709831016754	0.3741	0.7667	5836	0.3574	nonDE
105042570	XM_010919853	LOC105042570	DDB1- and CUL4-associated factor 8	protein_coding	XP_010918155.1	.	192	300	126	116	521671511600263	654353050953818	347633101403196	343877629366912	0.672	1385	5495	0.1609	nonDE
105042572	XM_010919858	LOC105042572	UDP-glucose 4-epimerase GEPI48	protein_coding	XP_010918160.1	.	173	209	175	146	47004776826482	45586595883116	482823751948884	432811499030769	-0.07912	0.1177	5528	0.871	nonDE
105042580	XM_010919865,XM_010919866,XR_831559	LOC105042580	cleavage and polyadenylation specificity factor subunit 1, transcript variant X1	protein_coding	XP_010918167.1		670	873	899	688	182041621235508	190416737827561	248033458858312	203955007762445	-0.3643	0.9608	7678	0.2803	nonDE
105042581	XM_010919869	LOC105042581	dynamin-related protein 5A	protein_coding	XP_010918171.1	.	2546	3900	2293	2396	691758160694932	850658966239963	632637064696451	710285172382002	0.102	0.1916	9486	0.7837	nonDE
105042584	XM_010919870,XM_019850279	LOC105042584	probable alpha-amylase 2, transcript variant X1	protein_coding	XP_010918172.1		300	245	250	482	81511173687541	534388324945618	689748217069834	142887083926596	-0.6833	0.8958	6341	0.3034	nonDE
105042585	XM_010919871	LOC105042585	prolyl endopeptidase	protein_coding	XP_010918173.1	.	778	1168	489	374	211385643763023	254761454504686	134914751258859	110870890847608	0.8318	2293	7398	0.05759	nonDE
105042586	XM_010919872,XM_010919873,XR_003800533	LOC105042586	coiled-coil domain-containing protein 124, transcript variant X2	protein_coding	XP_010918174.1		122	151	70	97	331478772996	329357702313422	193129500779553	28755284524647	0.4079	0.5514	4.81	0.4837	nonDE
105042588	XM_010919877,XM_029263860,XM_029263861	LOC105042588	putative tRNA pseudouridine synthase Pus10, transcript variant X2	protein_coding	XP_010918179.1		432	501	268	233	117376090110059	109276959509288	739410088698862	690719721055953	0.5688	1458	6494	0.1475	nonDE
105042613	XM_010919931	LOC105042613	uncharacterized LOC105042613	protein_coding	XP_010918233.1	.	116	129	206	119	315176538258492	281371811910142	568352530865543	352771016333298	-0.7079	1195	5196	0.2057	nonDE
105042633	XM_010919918	LOC105042633	serine/threonine-protein kinase BSK1	protein_coding	XP_010918220.1	.	318	288	272	204	864018441087935	628178928915665	750446060171979	604750313714225	0.02641	0.03398	6141	0.9602	nonDE
105042640	gene-LOC105042640	LOC105042640	.	pseudogene	.	.	124	350	107	153	336912851241836	763411892779454	295212236905889	453562735285669	0.4364	0.4575	5434	0.5476	nonDE
105042650	XM_010919934	LOC105042650	protein GRIP	protein_coding	XP_010918236.1	.	306	573	368	279	831413971612919	124981432732179	10153093755268	827084987873867	0.07241	0.103	6597	0.8863	nonDE
105042651	XM_010919936,XM_010919937,XR_003800534	LOC105042651	probable serine acetyltransferase 2, transcript variant X1	protein_coding	XP_010918238.1		240	283	176	194	652089389500328	617273044733101	485582744817163	57510569049294	0.1745	0.2958	5859	0.6812	nonDE
105042653	XM_010919939,XM_010919940,XM_010919941,XR_831561,XR_831563	LOC105042653	ubiquitin domain-containing protein DSK2b, transcript variant X3	protein_coding	XP_010918241.1		389	439	413	362	105692821881512	957536631229087	113946405459937	107313536061054	-0.2314	0.4897	6723	0.5247	nonDE
105042656	XM_010919943,XM_010919945,XM_029263867,XM_029263868	LOC105042656	phosphoinositide phosphatase SAC6, transcript variant X3	protein_coding	XP_010918245.1		353	571	377	357	959114810390066	124545197364877	104014031134131	105831304899989	-0.02424	0.03708	6744	0.9574	nonDE
105042658	XM_010919950,XM_019849651	LOC105042658	NPC intracellular cholesterol transporter 1, transcript variant X1	protein_coding	XP_010918252.2		107	428	88	100	29072318615223	933543686027447	242791372408581	296446232212855	0.9259	0.8112	5.23	0.3371	nonDE
105042664	XM_010919958	LOC105042664	signal recognition particle 54 kDa protein 2	protein_coding	XP_010918260.1	.	584	534	584	524	158675084778413	11647484306978	161125183507513	155337825679536	-0.3188	0.6527	7198	0.42	nonDE
105042667	XM_010919966,XM_019849747,XM_019849748,XM_019849750,XM_029263872	LOC105042667	uncharacterized LOC105042667, transcript variant X2	protein_coding	XP_010918268.1		206	494	29	33	559710059321115	107750135723729	800107931801007	978272566302423	3045	2923	4725	0.03039	upReg
105042692	XM_010919986	LOC105042692	L-type lectin-domain containing receptor kinase IV.1-like	protein_coding	XP_010918288.1	.	130	58	152	191	353215085979345	126508256517738	419366915978459	566212303526554	-1386	1683	5011	0.1107	nonDE
105042693	XM_010919987	LOC105042693	protein EXORDIUM-like 5	protein_coding	XP_010918289.1	.	153	25	206	165	415706985806459	545294209128181	568352530865543	489136283151212	-2081	1719	4827	0.1058	nonDE
105042694	XM_010919988,XR_831569	LOC105042694	SRSF protein kinase 1, transcript variant X1	protein_coding	XP_010918290.1	.	271	320	255	246	736317602310787	697976587684072	70354318141123	729257731243625	-0.09065	0.1527	6166	0.8274	nonDE
105042695	XM_010919989,XM_029263875	LOC105042695	epidermal growth factor receptor substrate 15, transcript variant X2	protein_coding	XP_010918291.1		313	437	441	373	850433245473345	953174277556061	121671585491119	110574444615395	-0.4543	1154	6677	0.2178	nonDE
105042697	XM_010919992,XM_019850047,XM_029263876,XM_029263877	LOC105042697	pyrophosphate-energized membrane proton pump 3, transcript variant X2	protein_coding	XP_010918294.1		1021	908	847	994	277409694449931	198050856755355	23368669594326	294667554819578	-0.2545	0.4534	7955	0.5517	nonDE
105042711	XM_010920006,XR_003800538	LOC105042711	probable protein S-acyltransferase 14, transcript variant X1	protein_coding	XP_010918308.1	.	187	272	194	159	508086315985672	593280099531461	535244616446191	47134950921844	0.03976	0.0576	5718	0.9348	nonDE
105042712	XM_010920018	LOC105042712	uncharacterized protein At4g10930	protein_coding	XP_010918320.1	.	228	325	186	176	619484920025312	708882471866636	513172673499956	521745368694626	0.2694	0.5319	5875	0.4974	nonDE
105042714	XM_010920008,XM_010920009,XM_010920011	LOC105042714	SNARE-interacting protein KEULE, transcript variant X2	protein_coding	XP_010918310.1		544	622	605	592	147806928286741	135669199231092	1669190685309	17549616947001	-0.3661	0.9236	7284	0.2939	nonDE
105042717	XM_010920015,XM_010920016,XR_003800542	LOC105042717	nucleolin, transcript variant X3	protein_coding	XP_010918317.1		363	332	199	257	986285201619247	724150709722225	549039580787588	761866816787039	0.2924	0.4581	6211	0.5473	nonDE
105042722	XM_019850181	LOC105042722	protein argonaute 1A	protein_coding	XP_019705740.1	.	363	460	362	346	986285201619247	100334134479585	998755418317119	102570396345648	-0.1155	0.2158	6651	0.7586	nonDE
105042727	XM_010920024	LOC105042727	NADH dehydrogenase [ubiquinone] 1 beta subcomplex subunit 7	protein_coding	XP_010918326.1	.	139	175	93	116	377668438085607	381705946389727	256586336749978	343877629366912	0.2735	0.3904	5075	0.6024	nonDE
105042733	XM_010920034	LOC105042733	serine hydroxymethyltransferase, mitochondrial	protein_coding	XP_010918336.1	.	873	1463	870	954	237197515430744	319106171181812	240032379540302	282809705531064	-0.0111	0.01687	8065	0.9797	nonDE
105042740	XM_010920039	LOC105042740	protein S-acyltransferase 21	protein_coding	XP_010918341.1	.	135	175	121	145	366800281593935	381705946389727	3338381370618	42984703670864	-0.09658	0.1258	5.24	0.8616	nonDE
105042742	XM_010920045,XM_029264660,XR_002165981	LOC105042742	probable inactive ATP-dependent zinc metalloprotease FTSHI 1, chloroplastic, transcript variant X1	protein_coding	XP_010918347.1		388	502	444	335	10542111796922	109495077192939	122499283351602	993094877913066	-0.1307	0.2438	6768	0.7305	nonDE
105042745	XM_010920049,XM_010920050,XM_029263892	LOC105042745	exosome complex exonuclease RRP44 homolog A, transcript variant X1	protein_coding	XP_010918351.1		998	1108	1275	1027	27116050446722	24167439348561	351771590705615	304450280482603	-0.4447	1.22	8178	0.1993	nonDE
105042748	XM_010920053	LOC105042748	serine/threonine-protein kinase/endoribonuclease IRE1b	protein_coding	XP_010918355.1	.	387	717	494	518	105149414056928	156390379177962	136294247692999	153559148286259	-0.252	0.4652	7091	0.5428	nonDE
105042752	XM_010920059,XM_010920060	LOC105042752	nucleolar complex protein 4 homolog B, transcript variant X1	protein_coding	XP_010918361.1		95	142	122	54	258118716677213	309727110784807	336597129930079	160080965394942	0.1749	0.1669	4687	0.8112	nonDE
105042756	XM_010920068	LOC105042756	uncharacterized LOC105042756	protein_coding	XP_010918370.1	.	157	67	386	413	426575142298131	146138848046353	106497124715582	122432293903909	-2386	3116	5743	0.02541	downReg
105042757	XM_010920069,XM_010920070	LOC105042757	nascent polypeptide-associated complex subunit beta, transcript variant X1	protein_coding	XP_010918371.1		108	108	105	48	293440225275148	235567098343374	28969425116933	142294191462171	0.2244	0.2113	4539	0.764	nonDE
105042760	XM_010920075	LOC105042760	thioredoxin-like protein YLS8	protein_coding	XP_010918377.1	.	703	794	292	294	191007850341138	17318544081911	805625917537566	871551922705795	1024	2745	6.95	0.03679	upReg
105042763	XM_010920082	LOC105042763	uncharacterized LOC105042763	protein_coding	XP_010918384.1	.	132	171	126	114	358649164225181	372981239043676	347633101403196	337948704722655	0.00241	0.002894	5151	0.9976	nonDE
105042764	XM_010920080	LOC105042764	serine carboxypeptidase-like 34	protein_coding	XP_010918382.1	.	558	381	145	288	151610783058826	831028374711348	400053965900504	853765148773024	0.8464	1048	6342	0.2488	nonDE
105042768	XM_010920087	LOC105042768	osmotin-like protein	protein_coding	XP_010918389.1	.	189	377	100	90	513520394231509	822303667365298	275899286827933	26680160899157	1178	2008	5397	0.07727	nonDE
105042770	XM_010920088	LOC105042770	heat shock cognate 70 kDa protein 2	protein_coding	XP_010918390.1	.	537	199	246	321	145905000900698	434054190466032	678712245596716	951592405403266	-0.1306	0.09002	6324	0.8988	nonDE
105042771	XM_010920089	LOC105042771	uncharacterized LOC105042771	protein_coding	XP_010918391.1	.	150	142	197	276	407555868437705	309727110784807	543521595051029	818191600907481	-1017	1827	5609	0.09438	nonDE
105042772	XM_010920093	LOC105042772	far upstream element-binding protein 3	protein_coding	XP_010918395.1	.	837	983	945	672	227416174588239	214409683029201	260724826052397	199211868047039	-0.1391	0.2744	7.81	0.7002	nonDE
105042773	XM_010920090	LOC105042773	vacuolar protein sorting-associated protein 2 homolog 1	protein_coding	XP_010918392.1	.	460	550	350	341	12498379965423	1199647260082	965647503897767	101088165184584	0.2172	0.4608	6783	0.5459	nonDE
105042779	XM_010920098,XM_029263900	LOC105042779	bifunctional nitrilase/nitrile hydratase NIT4, transcript variant X1	protein_coding	XP_010918400.1		410	433	222	236	111398604039639	94444957021001	612496416758012	699613108022339	0.5531	1267	6359	0.1882	nonDE
105042780	XM_010920099	LOC105042780	probable sphingolipid transporter spinster homolog 2	protein_coding	XP_010918401.1	.	536	692	440	486	145633296988407	150937437086681	121395686204291	144072868855448	0.07693	0.1345	7131	0.8502	nonDE
105042781	XM_010920100,XM_010920101,XM_029263901,XM_029263902	LOC105042781	nijmegen breakage syndrome 1 protein, transcript variant X2	protein_coding	XP_010918402.1		94	177	169	93	255401677554295	386068300062752	466269794739208	275694995957956	-0.2668	0.3175	5074	0.6629	nonDE
105042786	XR_831588	LOC105042786	uncharacterized LOC105042786	lncRNA	.	.	124	201	104	108	336912851241836	438416544139058	286935258301051	320161930789884	0.2737	0.4003	5099	0.5949	nonDE
105042791	XM_010920111	LOC105042791	DEAD-box ATP-dependent RNA helicase 47A	protein_coding	XP_010918413.1	.	263	325	276	137	714581289327443	708882471866636	761482031645096	406131338131612	0.2498	0.351	5978	0.6341	nonDE
105042792	XM_010920112,XM_019850226,XM_019850227	LOC105042792	myosin-1, transcript variant X2	protein_coding	XP_010918414.1		624	860	460	637	169543241270085	187581207940094	126913671940849	188836249919589	0.1202	0.1868	7378	0.79	nonDE
105042793	XM_010920116,XM_010920122,XM_010920130,XM_010920138,XM_010920146	LOC105042793	serine/threonine protein phosphatase 2A 55 kDa regulatory subunit B beta isoform, transcript variant X1	protein_coding	XP_010918418.1		369	569	378	340	100258743635675	124108961997574	104289930420959	100791718952371	0.0363	0.0584	6742	0.9341	nonDE
105042794	XM_019849779	LOC105042794	DNA-directed RNA polymerases II, IV and V subunit 12	protein_coding	XP_019705338.1	.	525	570	258	204	142644553953197	124327079681225	711820160016068	604750313714225	0.9219	2.35	6549	0.05464	nonDE
105042801	XM_010920121,XM_010920124,XM_029263904,XR_003800546,XR_831590	LOC105042801	trafficking protein particle complex subunit 13, transcript variant X1	protein_coding	XP_010918423.1		210	255	175	113	570578215812787	556200093310745	482823751948884	334984242400527	0.3779	0.6772	5577	0.4048	nonDE
105042802	XM_010920125,XM_029263905	LOC105042802	mediator of RNA polymerase II transcription subunit 16, transcript variant X1	protein_coding	XP_010918427.1		1463	1959	3123	2319	397502823682908	427292542272843	861633472763636	687458812501612	-0.9906	2853	9138	0.03275	downReg
105042804	XM_010920127	LOC105042804	clathrin light chain 2	protein_coding	XP_010918429.1	.	181	194	146	203	491784081248164	423148306283469	402812958768783	601785851392097	-0.1995	0.2757	5571	0.6996	nonDE
105042805	XM_010920128,XM_010920129	LOC105042805	protein STABILIZED1, transcript variant X2	protein_coding	XP_010918430.1		803	1052	1104	958	218178241570318	229459803201139	304592812658039	283995490459916	-0.4846	1448	8004	0.1484	nonDE
105042808	XM_010920134,XM_010920135,XM_010920136,XM_019849647	LOC105042808	probable prolyl 4-hydroxylase 3, transcript variant X4	protein_coding	XP_010918436.1		131	201	66	60	355932125102263	438416544139058	182093529306436	177867739327713	1.05	1.74	4745	0.1041	nonDE
105042809	XM_010920137	LOC105042809	uncharacterized LOC105042809	protein_coding	XP_010918439.1	.	183	190	221	211	497218159494	414423598937418	609737423889733	625501549969125	-0.5451	1183	5.73	0.209	nonDE
105042810	XM_010920139,XM_010920141,XM_029263907,XR_831591,XR_831592	LOC105042810	RNA polymerase II C-terminal domain phosphatase-like 1, transcript variant X5	protein_coding	XP_010918441.1		366	472	696	476	994436318988001	102951546683401	192025903632242	141108406533319	-0.7954	2049	7013	0.07439	nonDE
105042813	gene-LOC105042813	LOC105042813	.	pseudogene	.	.	119	103	118	149	323327655627246	224661214160811	325561158456961	441704885997155	-0.6077	0.9062	5005	0.3002	nonDE
105042815	XM_010920147	LOC105042815	uncharacterized LOC105042815	protein_coding	XP_010918449.1	.	142	181	76	161	385819555454361	394793007408803	209683457989229	477278433862697	0.2464	0.2502	5141	0.7245	nonDE
105042817	XM_010920158,XM_019850560	LOC105042817	probable protein arginine N-methyltransferase 1, transcript variant X1	protein_coding	XP_010918460.1		640	812	490	354	173890503866754	177111559124833	135190650545687	104941966203351	0.4647	1182	7177	0.2092	nonDE
105042818	XM_010920154	LOC105042818	HBS1-like protein	protein_coding	XP_010918456.1	.	145	156	158	141	393970672823115	340263586495985	435920873188135	417989187420126	-0.3276	0.5744	5.31	0.4694	nonDE
105042819	XM_010920155,XM_029263910	LOC105042819	DNA-directed RNA polymerase I subunit 2, transcript variant X1	protein_coding	XP_010918457.1		399	422	474	307	10840986100443	92045662500837	13077626195644	910089932893466	-0.2278	0.3999	6708	0.5954	nonDE
105042820	XM_010920159	LOC105042820	26S proteasome non-ATPase regulatory subunit 2 homolog A	protein_coding	XP_010918461.1	.	2676	2970	3895	2956	727079669292866	64780952044428	10746277221948	876295062421201	-0.5877	1594	9673	0.1241	nonDE
105042822	XM_010920160	LOC105042822	nucleolar complex protein 2 homolog	protein_coding	XP_010918462.1	.	106	168	124	69	288006147029312	366437708534138	342115115666638	20454790022687	0.2018	0.2312	4.88	0.7438	nonDE
105042823	XM_010920161	LOC105042823	vacuolar-sorting protein BRO1	protein_coding	XP_010918463.1	.	683	718	615	592	185573772095302	156608496861614	169678061399179	17549616947001	-0.1124	0.2105	7423	0.7644	nonDE
105042827	XM_010920168	LOC105042827	uncharacterized LOC105042827	protein_coding	XP_010918470.1	.	108	213	19	77	293440225275148	464590666177211	524208644973074	228263598803899	1734	1555	4343	0.1313	nonDE
105042844	XM_010920183,XM_019850153,XM_019850154	LOC105042844	uncharacterized LOC105042844, transcript variant X1	protein_coding	XP_010918485.1		114	248	134	109	309742460012656	540931855455156	369705044349431	323126393112012	0.1832	0.2166	5238	0.7586	nonDE
105042848	XM_010920188	LOC105042848	monothiol glutaredoxin-S11	protein_coding	XP_010918490.2	.	229	323	244	264	62220195914823	70452011819361	673194259860158	782618053041938	-0.2181	0.4109	6118	0.5855	nonDE
105042857	XM_010920200,XM_019850118	LOC105042857	luminal-binding protein 4, transcript variant X2	protein_coding	XP_010918502.1		1598	1265	746	1135	434182851842302	27591886981886	205820867973638	336466473561591	0.3086	0.4247	8238	0.5742	nonDE
105042859	XM_010920206	LOC105042859	protein NDL1	protein_coding	XP_010918508.1	.	120	194	102	223	326044694750164	423148306283469	281417272564492	661075097834668	-0.2552	0.2462	5328	0.728	nonDE
105042868	XM_010920217	LOC105042868	inorganic pyrophosphatase 2-like	protein_coding	XP_010918519.1	.	58	51	137	187	157588269129246	111240018662149	377982022954269	55435445423804	-1893	2567	4631	0.04378	downReg
105042870	XM_010920216	LOC105042870	membrane steroid-binding protein 1	protein_coding	XP_010918518.1	.	347	318	256	219	942812575652558	693614234011047	70630217427951	649217248546153	0.1556	0.2459	6212	0.7282	nonDE
105042871	XM_010920218,XM_010920219,XM_010920220,XM_010920221	LOC105042871	F-box/LRR-repeat protein At3g48880, transcript variant X1	protein_coding	XP_010918520.1		155	261	133	142	421141064052295	569287154329821	366946051481152	420953649742255	0.2458	0.3848	5.46	0.6069	nonDE
105042873	XM_010920223	LOC105042873	NAD-dependent malic enzyme 59 kDa isoform, mitochondrial	protein_coding	XP_010918525.1	.	1318	1468	1422	1445	358105756400597	320196759600068	392328785869321	428364805547576	-0.3657	0.947	8542	0.2855	nonDE
105042874	XM_010920236,XM_029264622,XM_029264625,XM_029264626	LOC105042874	G patch domain-containing protein 8, transcript variant X2	protein_coding	XP_010918538.1		324	369	279	168	880320675825443	804854252673196	769759010249934	498029670117597	0.3402	0.612	6177	0.4456	nonDE
105042879	XM_010920233	LOC105042879	transcription factor GLABRA 3	protein_coding	XP_010918535.1	.	139	193	125	157	377668438085607	420967129446956	344874108534917	465420584574183	-0.07917	0.1006	5326	0.8892	nonDE
105042882	XM_010920241	LOC105042882	tripeptidyl-peptidase 2	protein_coding	XP_010918543.1	.	572	1092	420	525	155414637830912	23818451054719	115877700467732	155634271911749	0.4401	0.8246	7.33	0.3319	nonDE
105042885	XM_010920244	LOC105042885	tubulin beta chain	protein_coding	XP_010918546.1	.	1724	2245	607	1557	468417544791069	489674199797107	167470867104556	461566783555416	0.6963	0.8284	8512	0.3304	nonDE
105042890	XM_010920253	LOC105042890	probable phospholipid hydroperoxide glutathione peroxidase	protein_coding	XP_010918555.1	.	303	244	88	109	823262854244165	532207148109105	242791372408581	323126393112012	1147	1806	5433	0.09645	nonDE
105042892	XM_010920254	LOC105042892	FT-interacting protein 3	protein_coding	XP_010918556.1	.	250	203	600	453	679259780729509	442778897812083	16553957209676	134290143192424	-1554	3.21	6501	0.02502	downReg
105042902	XM_010920264	LOC105042902	mediator of RNA polymerase II transcription subunit 12	protein_coding	XP_010918566.1	.	688	1034	1113	916	186932291656761	225533684895416	30707590623949	271544748706976	-0.5798	1682	7929	0.1107	nonDE
105042905	XM_010920271	LOC105042905	U-box domain-containing protein 33	protein_coding	XP_010918573.1	.	152	291	329	236	412989946683541	634722459425203	907708653663901	699613108022339	-0.7117	1449	6	0.1484	nonDE
105042909	NM_001303605	LOC105042909	probable aquaporin PIP1-2	protein_coding	NP_001290534.1	.	2504	3600	1243	1037	680346596378676	785223661144581	342942813527121	307414742804731	1079	3.17	8929	0.02519	upReg
105042910	XM_010920278,XM_010920280,XM_010920281,XM_010920282,XM_019849967	LOC105042910	mitogen-activated protein kinase kinase kinase YODA, transcript variant X2	protein_coding	XP_010918580.1		612	877	936	669	166282794322584	191289208562166	258241732470946	1983225293504	-0.4335	1.11	7651	0.2297	nonDE
105042912	XM_029264343	LOC105042912	silicon efflux transporter LSI2	protein_coding	XP_029120176.1	.	376	739	832	488	102160671021718	16118896821829	229548206640841	144665761319873	-0.5892	1087	7258	0.2363	nonDE
105042917	XM_010920287	LOC105042917	myosin-11	protein_coding	XP_010918589.1	.	170	311	133	151	461896650896066	678345996155458	366946051481152	447633810641412	0.3975	0.6583	5578	0.416	nonDE
105042925	XM_010920294,XR_002164535,XR_831609	LOC105042925	syndetin, transcript variant X1	protein_coding	XP_010918596.1	.	922	1213	899	782	250511007133043	264576750268994	248033458858312	231820953590453	0.01194	0.02145	7958	0.9757	nonDE
105042926	XM_010920295	LOC105042926	uncharacterized LOC105042926	protein_coding	XP_010918597.1	.	119	115	99	97	323327655627246	250835336198963	273140293959654	28755284524647	-0.09387	0.1042	4827	0.8848	nonDE
105042927	XM_029264613,XM_029264614	LOC105042927	pentatricopeptide repeat-containing protein At2g15690, mitochondrial, transcript variant X1	protein_coding	XP_029120446.1		163	209	112	108	44287737703564	45586595883116	309007201247285	320161930789884	0.4242	0.7704	5238	0.3564	nonDE
105042932	XM_010920306	LOC105042932	inactive protein kinase SELMODRAFT_444075	protein_coding	XP_010918608.1	.	770	928	1339	1339	209212012464689	202413210428381	369429145062603	396941504933014	-0.9873	2928	8134	0.03039	downReg
105042934	XM_010920305	LOC105042934	uncharacterized LOC105042934	protein_coding	XP_010918607.1	.	156	132	56	43	423858103175213	28791534241968	154503600623643	127471879851528	1171	1526	4479	0.1356	nonDE
105042935	XM_010920307	LOC105042935	arsenate reductase 2.2	protein_coding	XP_010918609.1	.	420	578	332	228	114115643162557	126072021150436	915985632268739	67589740944531	0.5155	1217	6604	0.1998	nonDE
105042936	XM_010920308	LOC105042936	E3 ubiquitin-protein ligase RFWD3	protein_coding	XP_010918610.1	.	212	218	188	126	576012294058623	475496550359774	518690659236515	373522252588198	0.1371	0.193	5589	0.7822	nonDE
105042938	XM_010920310,XM_010920311	LOC105042938	uncharacterized LOC105042938, transcript variant X1	protein_coding	XP_010918612.1		473	845	335	227	128515950514023	184309442685325	924262610873577	672932947123182	0.8785	1971	6786	0.08088	nonDE
105042939	XM_010920312	LOC105042939	vacuolar protein sorting-associated protein 24 homolog 1	protein_coding	XP_010918614.1	.	116	194	73	100	315176538258492	423148306283469	201406479384391	296446232212855	0.5253	0.7422	4907	0.3692	nonDE
105042940	XM_010920313	LOC105042940	serine carboxypeptidase-like	protein_coding	XP_010918615.1	.	205	253	154	143	556993020198197	55183773963772	424884901715018	423918112064383	0.2929	0.5571	5604	0.4794	nonDE
105042943	XM_010920315,XM_029263928,XM_029263929	LOC105042943	zinc finger protein GIS2, transcript variant X1	protein_coding	XP_010918617.1		187	138	128	122	508086315985672	301002403438756	353151087139755	361664403299684	-0.0009848	0.0009406	5.23	0.9988	nonDE
105042948	XM_010920324,XM_010920325,XM_029263933,XM_029263934	LOC105042948	mitochondrial outer membrane protein porin 6, transcript variant X4	protein_coding	XP_010918626.1		198	182	141	145	537973746337771	396974184245316	389017994427386	42984703670864	0.07166	0.08944	5446	0.8994	nonDE
105042949	XM_010920689,XM_019848307	LOC105042949	50S ribosomal protein L25, transcript variant X1	protein_coding	XP_010918991.1		88	165	132	100	239099442816787	3598941780246	364187058612872	296446232212855	-0.2251	0.2867	4963	0.6899	nonDE
105042954	XM_010920331,XM_019849664,XR_002164427,XR_003800558,XR_003800559	LOC105042954	uncharacterized LOC105042954, transcript variant X3	protein_coding	XP_010918633.1		140	243	158	164	380385477208525	530025971272592	435920873188135	486171820829083	-0.1055	0.1459	5511	0.8355	nonDE
105042955	XM_010920332	LOC105042955	uncharacterized LOC105042955	protein_coding	XP_010918634.1	.	219	242	158	108	59503156791905	52784479443608	435920873188135	320161930789884	0.4744	0.8817	5.52	0.3076	nonDE
105042956	XM_010920333,XM_019850048,XM_029263935	LOC105042956	pre-mRNA-processing protein 40A, transcript variant X1	protein_coding	XP_010918635.1		802	877	983	709	217906537658026	191289208562166	271208998951859	210180378638915	-0.3205	0.7472	7787	0.3669	nonDE
105042963	XM_010920344	LOC105042963	uncharacterized LOC105042963	protein_coding	XP_010918646.1	.	90	204	161	118	244533521062623	444960074648596	444197851792973	349806554011169	-0.3029	0.387	5178	0.6053	nonDE
105042964	XM_010920345,XM_010920346,XM_010920347,XM_010920348	LOC105042964	F-box protein SKIP31, transcript variant X1	protein_coding	XP_010918647.1		380	551	238	214	103247486670885	120182843691851	656640302650482	634394936935511	0.699	1823	6408	0.09469	nonDE
105042965	XM_010920350,XM_010920368,XM_029264590	LOC105042965	K(+) efflux antiporter 4, transcript variant X3	protein_coding	XP_010918652.1		194	331	140	170	527105589846099	721969532885712	386259001559107	503958594761854	0.4116	0.7195	5709	0.3803	nonDE
105042972	XM_010920356,XM_010920357,XM_010920359,XM_010920360,XM_010920361,XM_019850043,XM_019850044,XM_019850045,XM_019850046,XR_003800560,XR_003800561	LOC105042972	WAT1-related protein At4g19185, transcript variant X4	protein_coding	XP_010918658.1		398	599	192	222	108138157092138	130652492507112	529726630709632	658110635512539	0.9269	2231	6391	0.0615	nonDE
105042973	XM_010920362,XM_010920364,XM_029263944,XM_029263945,XM_029263946,XM_029263947	LOC105042973	uncharacterized LOC105042973, transcript variant X4	protein_coding	XP_010918664.1		104	132	55	31	282572068783476	28791534241968	151744607755363	918983319859852	1151	1523	4.21	0.1358	nonDE
105042989	XM_019849877	LOC105042989	carotenoid 9,10(9',10')-cleavage dioxygenase 1	protein_coding	XP_019705436.1	.	163	355	72	113	44287737703564	774317776962018	198647486516112	334984242400527	1131	1568	5286	0.1294	nonDE
105042992	XM_010920377,XM_010920378	LOC105042992	ruBisCO large subunit-binding protein subunit alpha, transcript variant X1	protein_coding	XP_010918679.1		204	174	67	65	554275981075279	379524769553214	184852522174715	192690050938356	1164	1.72	4886	0.1058	nonDE
105042993	XM_010920380,XM_010920382,XM_019850219,XM_019850220,XM_029263948,XM_029263949	LOC105042993	OTU domain-containing protein DDB_G0284757, transcript variant X2	protein_coding	XP_010918682.1		196	123	215	239	532539668091935	268284750891065	593183466680057	708506494988725	-0.9208	1447	5633	0.1484	nonDE
105042994	XM_010920386,XM_010920387	LOC105042994	serine/threonine-protein kinase PCRK1, transcript variant X1	protein_coding	XP_010918688.1		142	199	88	111	385819555454361	434054190466032	242791372408581	32905531775627	0.4607	0.738	5094	0.3708	nonDE
105042999	XM_010920394	LOC105042999	WD repeat-containing protein 3	protein_coding	XP_010918696.1	.	246	211	191	159	668391624237836	460228312504185	526967637841353	47134950921844	0.04377	0.05375	5.72	0.9398	nonDE
105043001	XM_010920396,XM_029263952	LOC105043001	lysine-specific demethylase SE14, transcript variant X1	protein_coding	XP_010918698.1		215	320	201	235	584163411427377	697976587684072	554557566524146	69664864570021	-0.04237	0.05933	5.98	0.9334	nonDE
105043011	XM_029263950	LOC105043011	ABC transporter G family member 28-like	protein_coding	XP_029119783.1	.	152	159	75	116	412989946683541	346807117005523	20692446512095	343877629366912	0.4176	0.5471	4996	0.4858	nonDE
105043012	XM_019849649,XM_029263951	LOC105043012	uncharacterized LOC105043012, transcript variant X1	protein_coding	XP_019705208.1		144	139	156	140	391253633700197	303183580275269	430402887451576	415024725097998	-0.4124	0.714	5259	0.3839	nonDE
105043025	XM_029263966,XM_029263967,XM_029263968,XM_029263969,XM_029263970,XR_003800588,XR_003800589,XR_003800590	LOC105043025	protein SHOOT GRAVITROPISM 6, transcript variant X7	protein_coding	XP_029119799.1		570	844	719	606	154871230006328	184091325001674	198371587229284	17964641672099	-0.2486	0.5891	7481	0.4598	nonDE
105043028	XM_010920418	LOC105043028	silicon efflux transporter LSI2	protein_coding	XP_010918720.1	.	1840	2691	852	647	499935198616918	586954686705574	235066192377399	191800712241717	1258	3472	8406	0.01923	upReg
105043030	XM_029263963	LOC105043030	uncharacterized LOC105043030	protein_coding	XP_029119796.1	.	142	173	182	147	385819555454361	377343592716702	502136702026839	435775961352898	-0.3923	0.763	5405	0.3593	nonDE
105043032	XM_010920471	LOC105043032	GTP-binding nuclear protein Ran1B	protein_coding	XP_010918773.1	.	790	1026	314	235	214646090710525	223788743426206	866323760639711	69664864570021	1402	3646	7029	0.01688	upReg
105043034	XM_010920441,XM_019850257	LOC105043034	uncharacterized LOC105043034, transcript variant X2	protein_coding	XP_010918743.1		223	400	161	94	605899724410722	87247073460509	444197851792973	278659458280084	0.9428	1697	5665	0.109	nonDE
105043037	XM_010920443	LOC105043037	bifunctional L-3-cyanoalanine synthase/cysteine synthase 1, mitochondrial	protein_coding	XP_010918745.1	.	696	308	359	292	189105922955095	67180246564592	990478439712281	865622998061538	0.1591	0.1315	6677	0.8539	nonDE
105043038	XM_010920444	LOC105043038	ATP-dependent helicase BRM	protein_coding	XP_010918746.1	.	1172	1353	1797	1284	318436985205994	295113225980172	495791018429796	380636962161306	-0.5924	1.62	8512	0.1198	nonDE
105043039	XM_029261540	LOC105043039	uncharacterized LOC105043039	protein_coding	XP_029117373.1	.	114	221	83	67	309742460012656	482040080869312	228996408067185	198618975582613	0.7885	1167	4851	0.2139	nonDE
105043053	XM_010920466,XM_019850077,XM_019850078,XM_029263957	LOC105043053	ethylene receptor 2, transcript variant X3	protein_coding	XP_010918768.1		102	61	160	193	27713799053764	133051787027276	441438858924694	572141228170811	-1.54	2181	4964	0.06487	nonDE
105043058	XM_010920472,XM_010920473	LOC105043058	bet1-like SNARE 1-1, transcript variant X1	protein_coding	XP_010918774.1		150	221	123	77	407555868437705	482040080869312	339356122798358	228263598803899	0.5694	0.9543	5.14	0.2831	nonDE
105043061	XM_010920476,XM_029263956	LOC105043061	poly [ADP-ribose] polymerase 1, transcript variant X1	protein_coding	XP_010918778.2		633	752	470	429	171988576480712	164024498105757	129672664809129	127175433619315	0.2944	0.7167	7.2	0.382	nonDE
105043063	XM_010920478,XM_019849657	LOC105043063	signal recognition particle receptor subunit beta, transcript variant X1	protein_coding	XP_010918780.1		165	250	73	84	448311455281476	545294209128181	201406479384391	249014835058799	1065	1909	5063	0.08723	nonDE
105043065	XM_010920479,XM_010920480,XM_010920481	LOC105043065	uncharacterized LOC105043065, transcript variant X1	protein_coding	XP_010918781.1		261	269	249	205	709147211081607	586736569021923	686989224201554	607714776036354	-0.1016	0.1601	6016	0.8205	nonDE
105043066	XM_010920482,XM_029263954,XM_029263955	LOC105043066	autophagy-related protein 9, transcript variant X2	protein_coding	XP_010918784.1		184	268	268	161	499935198616918	58455539218541	739410088698862	477278433862697	-0.2298	0.3626	5828	0.6252	nonDE
105043075	XM_010920495,XM_010920496,XM_010920497,XM_010920498	LOC105043075	programmed cell death protein 2, transcript variant X2	protein_coding	XP_010918797.1		223	354	161	118	605899724410722	772136600125505	444197851792973	349806554011169	0.6993	1473	5702	0.1447	nonDE
105043079	XM_010920504,XM_010920505	LOC105043079	probable inorganic phosphate transporter 1-8, transcript variant X1	protein_coding	XP_010918806.1		273	212	566	539	741751680556623	462409489340698	15615899634461	159784519162729	-1539	3171	6.59	0.02519	downReg
105043096	XM_019850275	LOC105043096	ubiquitin-conjugating enzyme E2 4	protein_coding	XP_019705834.1	.	221	506	175	180	600465646164886	110367547927544	482823751948884	53360321798314	0.6073	0.9999	6.01	0.2659	nonDE
105043116	XM_010920568	LOC105043116	GTP-binding nuclear protein Ran-A1	protein_coding	XP_010918870.1	.	1295	1783	635	637	351856566417885	388903829950219	175196047135738	188836249919589	0.9345	2753	8.02	0.03657	upReg
105043118	XM_010920532,XM_029264016	LOC105043118	CLIP-associated protein, transcript variant X1	protein_coding	XP_010918834.1		457	777	436	468	124168687917354	169477440197039	120292089056979	138736836675616	0.0866	0.1397	7098	0.843	nonDE
105043119	XM_010920534	LOC105043119	chaperonin CPN60-2, mitochondrial	protein_coding	XP_010918836.1	.	341	431	201	208	92651034091505	940087216536985	554557566524146	616608163002739	0.5849	1431	6.21	0.1516	nonDE
105043124	XM_010920542,XM_019850054,XM_029264013,XM_029264014	LOC105043124	DNA mismatch repair protein MSH1, mitochondrial, transcript variant X3	protein_coding	XP_010918844.1		107	136	64	57	29072318615223	296640049765731	176575543569877	168974352361328	0.667	0.9829	4502	0.272	nonDE
105043126	XM_010920543,XM_019850197,XM_019850198,XM_019850199,XM_019850200,XM_019850201,XM_029264012	LOC105043126	uncharacterized LOC105043126, transcript variant X1	protein_coding	XP_010918845.1		210	218	173	207	570578215812787	475496550359774	477305766212325	613643700680611	-0.1495	0.2204	5734	0.7541	nonDE
105043128	XM_010920544,XM_029264011	LOC105043128	protein PIR, transcript variant X1	protein_coding	XP_010918846.1		1740	2591	1849	1605	472764807387738	565142918340447	510137781344849	475796202701633	-0.02201	0.03883	8979	0.955	nonDE
105043129	XM_010920545	LOC105043129	probable leucine-rich repeat receptor-like protein kinase At5g63930	protein_coding	XP_010918847.1	.	404	475	605	643	109768380565889	103605899734354	1669190685309	190614927312866	-0.8329	2265	7109	0.05879	nonDE
105043132	XM_010920550,XR_003800597	LOC105043132	xyloglucan galactosyltransferase KATAMARI1 homolog, transcript variant X2	protein_coding	XP_010918852.1	.	488	566	600	827	1325915091984	12345460894662	16553957209676	245161034040031	-0.7433	1649	7328	0.115	nonDE
105043146	XM_010920569	LOC105043146	protein VACUOLELESS1	protein_coding	XP_010918871.1	.	410	432	502	311	111398604039639	942268393373497	138501441987623	921947782181981	-0.243	0.4179	6751	0.5787	nonDE
105043147	XM_010920565,XM_019850083,XM_029263999	LOC105043147	myosin-6, transcript variant X3	protein_coding	XP_010918867.1		988	1343	1325	1264	268443465344302	292932049143659	365566555047012	374708037517049	-0.4906	1455	8332	0.148	nonDE
105043149	XM_010920572,XM_010920573,XM_010920574,XM_010920575,XM_010920576,XM_019850192,XM_019850193,XM_029263993,XM_029263995,XR_003800594	LOC105043149	uncharacterized LOC105043149, transcript variant X10	protein_coding	XP_010918874.1		185	206	233	137	502652237739836	449322428321622	642845338309085	406131338131612	-0.2143	0.3138	5627	0.6652	nonDE
105043152	XM_010920584,XM_019850084,XM_019850085,XM_019850086,XM_019850087,XM_019850091,XM_019850092,XM_019850093,XM_019850095,XM_019850096,XM_019850097,XM_029263985,XM_029263986,XM_029263987,XM_029263988,XM_029263989,XM_029263990,XM_029263991,XM_029263992	LOC105043152	uncharacterized LOC105043152, transcript variant X1	protein_coding	XP_010918886.1		107	144	74	114	29072318615223	314089464457833	204165472252671	337948704722655	0.1366	0.1434	4823	0.8385	nonDE
105043153	XM_010920586,XM_029263983,XM_029263984	LOC105043153	protein CHROMATIN REMODELING 20, transcript variant X1	protein_coding	XP_010918888.1		226	295	307	273	614050841779476	643447166771254	847010810561756	809298213941096	-0.4873	1199	6175	0.2047	nonDE
105043155	XM_010920591	LOC105043155	3-ketoacyl-CoA thiolase 2, peroxisomal	protein_coding	XP_010918893.1	.	495	554	503	974	134493436584443	120837196742805	138777341274451	288738630175321	-0.7366	1.13	7321	0.2251	nonDE
105043165	XM_010920602,XM_010920603,XM_010920604	LOC105043165	uncharacterized LOC105043165, transcript variant X1	protein_coding	XP_010918904.1		171	241	181	80	464613690018984	525663617599567	49937770915856	237156985770284	0.4025	0.5338	5371	0.4962	nonDE
105043168	XM_010920608,XM_019850239	LOC105043168	exosome complex exonuclease RRP44 homolog A, transcript variant X2	protein_coding	XP_010918910.1		746	855	1044	674	202691118569685	186490619521838	288038855448363	199804760511465	-0.3983	0.9064	7756	0.3002	nonDE
105043171	XM_029263975	LOC105043171	E3 ubiquitin-protein ligase RZFP34	protein_coding	XP_029119808.1	.	1008	1618	442	522	273877543590138	352914412147759	121947484777947	154744933215111	1.09	2728	7692	0.03747	upReg
105043173	XM_010920617,XM_029263973,XM_029263974	LOC105043173	pullulanase 1, chloroplastic, transcript variant X1	protein_coding	XP_010918919.1		268	650	294	196	728166484942033	141776494373327	811143903274124	581034615137197	0.4883	0.7215	6387	0.3794	nonDE
105043174	XM_010920620,XM_010920621	LOC105043174	ras-related protein RABC2a, transcript variant X2	protein_coding	XP_010918922.1		284	610	196	208	771639110908722	133051787027276	54076260218275	616608163002739	0.7383	1372	6.26	0.1644	nonDE
105043175	XM_010920622,XR_003800593	LOC105043175	protein fluG, transcript variant X2	protein_coding	XP_010918924.1	.	1195	1592	840	660	324686175188705	347243352372826	231755400935464	195654513260485	0.565	1656	8064	0.1139	nonDE
105043176	XM_010920623,XM_010920624,XM_010920625,XM_029263971,XM_029263972	LOC105043176	uncharacterized LOC105043176, transcript variant X2	protein_coding	XP_010918925.1		131	171	84	129	355932125102263	372981239043676	231755400935464	382415639554584	0.2229	0.2702	5048	0.7046	nonDE
105043187	XM_010920641	LOC105043187	uncharacterized LOC105043187	protein_coding	XP_010918943.1	.	149	202	100	88	404838829314787	440597720975571	275899286827933	260872684347313	0.563	1.02	5079	0.2593	nonDE
105043188	XM_010920642,XM_010920643,XM_010920644	LOC105043188	WD repeat-containing protein 70, transcript variant X2	protein_coding	XP_010918944.1		174	154	85	84	472764807387738	33590123282296	234514393803743	249014835058799	0.604	0.8928	4962	0.3044	nonDE
105043189	XM_019850129,XM_019850130,XM_019850131	LOC105043189	ABC transporter C family member 5, transcript variant X1	protein_coding	XP_019705688.1		344	706	222	205	934661458283804	153991084657798	612496416758012	607714776036354	0.8977	1.85	6421	0.09205	nonDE
105043193	XM_010920649,XM_010920651	LOC105043193	bifunctional riboflavin kinase/FMN phosphatase, transcript variant X2	protein_coding	XP_010918951.1		229	594	91	122	62220195914823	129561904088856	251068351013419	361664403299684	1517	2.06	5705	0.07334	nonDE
105043195	XM_010920652,XM_019850232,XM_029264018,XM_029264019	LOC105043195	tryptophan decarboxylase 2, transcript variant X1	protein_coding	XP_010918954.1		182	295	79	115	494501120371082	643447166771254	217960436594067	340913167044784	0.9846	1682	5299	0.1107	nonDE
105043199	XM_010920657	LOC105043199	WD repeat-containing protein WDS homolog	protein_coding	XP_010918959.1	.	148	177	84	70	402121790191869	386068300062752	231755400935464	207512362548999	0.7411	1284	4884	0.1845	nonDE
105043202	XM_029264020,XM_029264021,XM_029264022,XM_029264023,XM_029264024,XM_029264025,XM_029264026	LOC105043202	uncharacterized LOC105043202, transcript variant X4	protein_coding	XP_029119853.1		104	246	126	106	282572068783476	536569501782131	347633101403196	314233006145627	0.1872	0.205	5.17	0.7698	nonDE
105043205	XM_010920664,XM_029264028	LOC105043205	sulfofructose kinase, transcript variant X2	protein_coding	XP_010918966.1		912	1523	412	482	247793968010125	332193232200888	113670506173109	142887083926596	1083	2654	7.58	0.03995	upReg
105043210	XM_010920673,XM_019850063,XM_019850064,XR_003800598	LOC105043210	uncharacterized LOC105043210, transcript variant X4	protein_coding	XP_010918975.1		352	306	437	275	956397771267148	667440111972894	120567988343807	815227138585353	-0.4151	0.7091	6478	0.3867	nonDE
105043212	XM_010920676,XM_010920677	LOC105043212	protein MICRORCHIDIA 2, transcript variant X1	protein_coding	XP_010918978.1		96	237	102	112	260835755800131	516938910253516	281417272564492	332019780078398	0.2349	0.247	5072	0.7275	nonDE
105043215	XM_010920682,XM_010920683	LOC105043215	V-type proton ATPase subunit a3, transcript variant X2	protein_coding	XP_010918984.1		918	1179	1132	916	249424191483876	25716074902485	312317992689221	271544748706976	-0.2918	0.7666	8086	0.3574	nonDE
105043216	XM_010920684,XM_019850104,XM_029264031	LOC105043216	synaptotagmin-5, transcript variant X1	protein_coding	XP_010918986.1		196	192	141	178	532539668091935	418785952610443	389017994427386	527674293338883	-0.03482	0.04087	5536	0.953	nonDE
105043219	XM_010920687	LOC105043219	UTP:RNA uridylyltransferase 1	protein_coding	XP_010918989.2	.	141	261	156	140	383102516331443	569287154329821	430402887451576	415024725097998	0.07197	0.09204	5478	0.8965	nonDE
105043225	XM_010920696	LOC105043225	polygalacturonate 4-alpha-galacturonosyltransferase	protein_coding	XP_010918998.1	.	586	922	312	398	159218492602997	201104504326473	860805774903152	117985600420716	0.7455	1724	7071	0.1055	nonDE
105043236	XM_010920705,XM_019849711	LOC105043236	uncharacterized calcium-binding protein At1g02270, transcript variant X1	protein_coding	XP_010919007.1		217	100	108	189	589597489673214	218117683651273	297971229774168	560283378882297	-0.3411	0.2716	5264	0.7035	nonDE
105043238	XM_010920708	LOC105043238	40S ribosomal protein S17	protein_coding	XP_010919010.1	.	137	157	76	85	372234359839771	342444763332498	209683457989229	251979297380927	0.5395	0.8413	4847	0.325	nonDE
105043244	XM_010920714,XM_010920715,XM_029264033	LOC105043244	cadmium/zinc-transporting ATPase HMA2, transcript variant X1	protein_coding	XP_010919016.1		114	186	227	192	309742460012656	405698891591367	626291381099409	569176765848683	-0.8221	1817	5528	0.09526	nonDE
105043247	XM_010920718	LOC105043247	uncharacterized LOC105043247	protein_coding	XP_010919020.1	.	368	606	543	281	999870397233837	132179316292671	149813312747568	833013912518124	-0.04916	0.0583	6826	0.9341	nonDE
105043252	XM_010920726	LOC105043252	nascent polypeptide-associated complex subunit alpha-like protein 4	protein_coding	XP_010919028.1	.	230	191	134	103	624918998271148	416604775773931	369705044349431	305339619179241	0.482	0.7322	5377	0.3737	nonDE
105043253	XM_010920727,XM_019850285,XM_029264034	LOC105043253	serine/threonine-protein kinase ATG1a, transcript variant X1	protein_coding	XP_010919029.1		122	163	105	58	331478772996	355531824351574	28969425116933	171938814683456	0.5086	0.7101	4798	0.386	nonDE
105043264	XM_010920744	LOC105043264	arginase 1, mitochondrial	protein_coding	XP_010919046.1	.	334	383	300	195	907491067054624	835390728384374	8276978604838	578070152815068	0.2321	0.4106	6281	0.5855	nonDE
105043265	XM_010920745	LOC105043265	FAM10 family protein At4g22670	protein_coding	XP_010919047.2	.	489	825	304	322	132863213110692	1799470890123	838733831956918	954556867725395	0.7066	1713	6.88	0.1068	nonDE
105043279	XM_010920768	LOC105043279	60S ribosomal protein L9	protein_coding	XP_010919070.1	.	563	809	503	444	152969302620285	17645720607388	138777341274451	131622127102508	0.1935	0.4258	7221	0.5738	nonDE
105043289	XM_010920781	LOC105043289	SUMO-conjugating enzyme SCE1	protein_coding	XP_010919083.1	.	331	452	310	309	899339949685869	985891930103752	855287789166594	916018857537724	0.001069	0.001619	6515	0.998	nonDE
105043293	XM_010920785	LOC105043293	homeobox protein knotted-1-like 3	protein_coding	XP_010919087.1	.	123	263	114	116	334195812118918	573649508002847	314525186983844	343877629366912	0.3561	0.4784	5251	0.5325	nonDE
105043299	XM_010920794	LOC105043299	E3 ubiquitin-protein ligase RHA1B	protein_coding	XP_010919096.1	.	124	135	65	73	336912851241836	294458872929218	179334536438157	216405749515385	0.574	0.824	4647	0.3319	nonDE
105043300	XM_010920795,XM_010920796,XM_019850075	LOC105043300	uncharacterized LOC105043300, transcript variant X1	protein_coding	XP_010919097.1		607	639	931	883	164924274761125	139377199853163	256862236036806	261762023043951	-0.8697	2.45	7632	0.04917	downReg
105043303	XM_019850176,XM_019850177,XM_019850178	LOC105043303	mechanosensitive ion channel protein 1, mitochondrial, transcript variant X3	protein_coding	XP_019705735.1		270	399	390	314	733600563187869	870289557768578	107600721862894	930841169148366	-0.413	0.9729	6485	0.276	nonDE
105043308	XM_010920809,XM_010920825,XM_010920833	LOC105043308	28 kDa heat- and acid-stable phosphoprotein, transcript variant X1	protein_coding	XP_010919111.1		150	129	106	94	407555868437705	281371811910142	292453244037609	278659458280084	0.1156	0.1279	4965	0.8586	nonDE
105043312	XM_010920811	LOC105043312	mitogen-activated protein kinase 2	protein_coding	XP_010919113.1	.	334	346	503	390	907491067054624	754687185433403	138777341274451	115614030563014	-0.7115	1769	6.68	0.1011	nonDE
105043320	XM_010920826	LOC105043320	CAAX prenyl protease 1 homolog	protein_coding	XP_010919128.1	.	475	523	504	421	129059358338607	114075548549616	139053240561278	124803863761612	-0.2148	0.4522	6984	0.5525	nonDE
105043323	XM_010920829,XR_002164545,XR_002164546	LOC105043323	DUF21 domain-containing protein At2g14520, transcript variant X1	protein_coding	XP_010919131.1	.	254	336	208	166	690127937221181	732875417068276	573870516602102	49210074547334	0.3264	0.6847	5945	0.4	nonDE
105043331	XM_010920838,XM_010920841,XM_010920842,XM_019850057,XM_029264059	LOC105043331	CBL-interacting protein kinase 9, transcript variant X3	protein_coding	XP_010919140.1		350	262	337	338	950963693021312	571468331166334	929780596610136	100198826487945	-0.4908	0.8437	6401	0.3243	nonDE
105043337	XM_010920846	LOC105043337	rho GTPase-activating protein 5	protein_coding	XP_010919148.1	.	111	197	55	74	301591342643902	429691836793007	151744607755363	219370211837513	0.9271	1.32	4688	0.1767	nonDE
105043338	XM_019850051	LOC105043338	ubiquitin fusion degradation protein 1 homolog	protein_coding	XP_019705610.1	.	364	657	307	280	989002240742165	143303318158886	847010810561756	830049450195995	0.4245	0.8976	6645	0.3026	nonDE
105043342	XM_010920851,XM_029264060	LOC105043342	lysine-specific histone demethylase 1 homolog 3, transcript variant X1	protein_coding	XP_010919153.1		558	647	795	731	151610783058826	141122141322373	219339933028207	216702195747597	-0.6687	1954	7481	0.08225	nonDE
105043350	XM_010920862,XM_010920863,XM_029264064	LOC105043350	ribosome production factor 2 homolog, transcript variant X1	protein_coding	XP_010919164.1		195	246	228	172	529822628969017	536569501782131	629050373967688	509887519406111	-0.1827	0.3208	5784	0.6598	nonDE
105043354	XM_010920871,XM_010920872,XM_010920873,XM_010920874	LOC105043354	protein Spindly, transcript variant X4	protein_coding	XP_010919173.1		382	526	308	165	103790894495469	114729901600569	849769803430035	489136283151212	0.6593	1301	6393	0.1798	nonDE
105043360	XM_010920880,XM_010920882	LOC105043360	K(+) efflux antiporter 5, transcript variant X2	protein_coding	XP_010919182.1		290	441	210	162	78794134564623	961898984902112	57938850233866	480242896184826	0.6313	1.48	6085	0.1434	nonDE
105043377	XM_019850060,XM_019850061,XM_019850062	LOC105043377	SPX domain-containing membrane protein OsI_17046, transcript variant X2	protein_coding	XP_019705619.1		445	750	401	339	120908240969853	163588262738454	110635614018001	100495272720158	0.3312	0.7186	6.93	0.3807	nonDE
105043379	XM_019850036,XR_002164533	LOC105043379	DNA-directed RNA polymerase IV subunit 1, transcript variant X1	protein_coding	XP_019705595.1	.	207	291	128	168	562427098444033	634722459425203	353151087139755	498029670117597	0.4361	0.7875	5649	0.3481	nonDE
105043382	XM_010920905,XM_010920906,XM_010920907,XM_010920908	LOC105043382	uncharacterized LOC105043382, transcript variant X4	protein_coding	XP_010919207.1		128	146	144	111	347781007733508	318451818130858	397294973032224	32905531775627	-0.2291	0.3433	5122	0.6397	nonDE
[truncated: 4,399 more rows]

## Sheet: exclusive_genes_root_matrix
Table 2. Exclusive genes in the roots of each matrix (UFES_250 and SM).
[truncated: 276 more rows]

[truncated: 4 more sheets: 444_DEG, GO_DEG, Top_50_DEGs, GO_nonDE]
