# Supplementary material for: Conserved stress-responsive genes involved in the early development of Euterpe edulis
Source: Research Square preprint supplement (doi:10.21203/rs.3.rs-5678569/v1), 2025-05-05
Supplement: Supplementary file 4 [file f7b8fe4e9e14d3cee56c81bc.xlsx]

## Sheet: 7140_after_filter_cpm
Table 1. Expression profile of mapped genes after normalization with the Counts Per Million (CPM) method for leaf and root tissues.
Gene_ID	Transcript_ID	Gene_Symbol	Description	gene_biotype	Protein_ID	locus_tag	UFES_250LP1	UFES_250LP3	UFES_250RP1	UFES_250RP2	SMLP1	SMLP3	SMRP1	SMRP2	UFES_250LP1_CPM	UFES_250LP3_CPM	UFES_250RP1_CPM	UFES_250RP2_CPM	SMLP1_CPM	SMLP3_CPM	SMRP1_CPM	SMRP2_CPM	logFC	negLog10PValue	logCPM	AdjPValue	status
12079378	gene-ElguCp012	atpF	ATP synthase CF0 subunit I	protein_coding	YP_006073090.1	ElguCp012	39161	46471	13174	17987	112305	98082	13064	12947	270798258443784	332021091137721	38102278616911	479094645097863	811328795536691	606129782668465	353567379566111	377073730772793	-0.9241	0.3446	12.06	0.8058	nonDE
12079379	gene-ElguCp014	atpI	ATP synthase CF0 subunit IV	protein_coding	YP_006073092.1	ElguCp014	14022	19012	4157	7732	46190	22515	4703	4942	969621097494634	135834928981738	120230129201836	205946505581624	33369197333903	139138802805617	127283174073746	143932832121661	-0.7745	0.2868	10.57	0.837	nonDE
12079380	gene-ElguCp015	rps2	ribosomal protein S2	protein_coding	YP_006073093.1	ElguCp015	4910	6626	2377	3830	10594	8731	3081	3081	339526429089905	47340744762939	687483803494743	102014370974861	765345911572566	539560687228887	833849583927732	897323059018286	-0.7088	0.3819	9361	0.7875	nonDE
12079382	gene-ElguCp020	petN	cytochrome b6/f complex subunit VIII	protein_coding	YP_006073097.1	ElguCp020	4527	4016	967	1514	5883	4618	565	643	313041984621181	286930925095024	279678938990079	403263074819684	425007551234794	285384406554003	152913020097101	187269953569866	-0.0007385	0.0001998	8117	0.9999	nonDE
12079383	gene-ElguCp021	psbM	photosystem II protein M	protein_coding	YP_006073098.1	ElguCp021	1203	1337	70	122	7145	1058	34	41	831874326263047	955245634591752	202456315711536	324954393183629	516178642456672	65382568673481	920184545717069	119410079259168	0.12	0.01916	5525	0.991	nonDE
12079385	rna-ElguCp023	trnY-GUA	tRNA-Tyr	tRNA	.	ElguCp023	862	618	111	112	1122	835	71	98	59607287551018	441542110828499	321037872056864	298318787184971	810570240498791	516015546714146	1921561845468	285419213838987	-0.07794	0.01857	5304	0.9912	nonDE
12079386	rna-ElguCp024	trnE-UUC	tRNA-Glu	tRNA	.	ElguCp024	558	391	67	88	634	471	57	61	385856919413782	27935754908405	193779616466756	234393332788191	458022756217677	291069847308219	154266232664332	177658898409982	0.002734	0.000679	4679	0.9997	nonDE
12079388	gene-ElguCp026	psbD	photosystem II protein D2	protein_coding	YP_006073099.1	ElguCp026	321659	368063	2024	3100	334047	222955	1438	1641	222427152046089	262969763653511	585387975714497	825703785958401	241326699757486	137782330799584	389183934335631	477931561132427	0.1145	0.01373	11.73	0.9944	nonDE
12079390	gene-ElguCp029	psbZ	photosystem II protein Z	protein_coding	YP_006073101.1	ElguCp029	9498	18478	392	755	52474	11992	330	451	656786562830126	132019662198851	11337553679846	201098825289869	379089686273918	741084842658208	893120294372449	131351087185085	-0.6896	0.1173	8644	0.9363	nonDE
12079391	gene-ElguCp034	psaA	photosystem I P700 apoprotein A1	protein_coding	YP_006073104.1	ElguCp034	492705	585195	8237	11411	512054	513831	6337	8437	34070543634367	418103941013403	238233238930846	303938900050688	369924896549348	317538663932546	171506160770855	245722643587708	-0.1033	0.01467	13.17	0.9941	nonDE
12079392	gene-ElguCp035	ycf3	photosystem I assembly protein ycf3	protein_coding	YP_006073105.1	ElguCp035	11216	12856	3315	6914	23483	20017	3646	3639	775586238018814	918521905632877	958775266548201	184158579874722	169649028142898	12370159519254	986762604024833	105983726444906	-0.6144	0.2374	10.15	0.8674	nonDE
12079393	gene-ElguCp037	rps4	ribosomal protein S4	protein_coding	YP_006073106.1	ElguCp037	1592	2032	728	1188	2292	2014	712	878	110086777008377	145180189191506	210554568339997	316430999264058	165581728273015	124461713902071	192697469573692	255712316072072	-0.2702	0.1292	7489	0.9298	nonDE
12079395	gene-ElguCp041	ndhJ	NADH dehydrogenase subunit J	protein_coding	YP_006073107.1	ElguCp041	8391	10091	715	1215	14025	12322	613	737	580237528817392	720971106856049	206794665333926	323622612883696	101321280062349	761478271450504	165903860742519	214646898570749	-0.3997	0.08896	8673	0.9519	nonDE
12079396	gene-ElguCp042	ndhK	NADH dehydrogenase subunit K	protein_coding	YP_006073108.1	ElguCp042	14439	20322	1757	2478	21144	22757	1735	1807	99845664147233	145194478580206	508165352435954	660030316646748	152751311631965	140634320917052	469564760829151	526278081027602	-0.3888	0.09643	9722	0.9471	nonDE
12079397	gene-ElguCp043	ndhC	NADH dehydrogenase subunit 3	protein_coding	YP_006073109.1	ElguCp043	6109	8022	708	1213	10550	9232	729	853	422437261773978	573147380755051	20477010217681	323089900763723	762167204747081	570521620031736	197298392302277	248431213678221	-0.478	0.1225	8527	0.933	nonDE
12079399	gene-ElguCp049	accD	acetyl-CoA carboxylase carboxyltransferase beta subunit	protein_coding	YP_006073113.1	ElguCp049	15601	18028	17221	34346	34012	23270	13902	20579	107880892469076	128804549741362	498071458981194	914826523629911	245714037610026	143804572120218	376247222192903	599351224652298	-0.4778	0.3576	11.5	0.8017	nonDE
12079400	gene-ElguCp050	psaI	photosystem I subunit VIII	protein_coding	YP_006073114.1	ElguCp050	4916	6431	2418	4502	13557	6154	1701	1965	339941329003253	459475293646938	699341959129276	119913498205959	979402918934235	380306547841779	460362915371981	572294648156745	-0.3437	0.1324	9181	0.9266	nonDE
12079401	gene-ElguCp051	ycf4	photosystem I assembly protein Ycf4	protein_coding	YP_006073115.1	ElguCp051	14316	18282	1837	2712	35869	25088	1912	2435	989951193248693	130619302106256	531303217088701	722357634683608	259129625280313	155039497436701	517468485709128	709179373161158	-0.7984	0.2163	9.91	0.8818	nonDE
12079402	gene-ElguCp054	psbJ	photosystem II protein J	protein_coding	YP_006073118.1	ElguCp054	23044	21888	2018	2838	53863	43187	2480	2442	159349226719914	156383069932268	583652635865541	755918498241917	38912428577528	266888184622082	671193433346568	711218081831436	-0.9754	0.2469	10.27	0.8641	nonDE
12079403	gene-ElguCp055	psbL	photosystem II protein L	protein_coding	YP_006073119.1	ElguCp055	12432	16256	1733	2452	49922	25264	2168	2325	859672620457373	116144151353205	50122399304013	653105059087096	360653186686102	15612714697229	586752969151354	67714252262821	-1133	0.3207	9.91	0.818	nonDE
12079404	gene-ElguCp056	psbF	photosystem II cytochrome b559 beta subunit	protein_coding	YP_006073120.1	ElguCp056	30504	32539	3018	3823	60036	62076	3595	3755	210935115946201	23248120945386	872875944024878	10182792173287	433720097670102	3836189350638	972959835839077	109362157955653	-0.905	0.2335	10.75	0.8706	nonDE
12079405	gene-ElguCp057	psbE	photosystem II cytochrome b559 alpha subunit	protein_coding	YP_006073121.1	ElguCp057	65403	68628	6258	7825	122996	126864	8009	7898	452261650545154	490326083850133	180995946246113	2084236169395	888564147062293	783997560698723	216757589019059	230024586826564	-0.8688	0.2212	11.82	0.8796	nonDE
12079406	gene-ElguCp058	petL	cytochrome b6/f complex subunit VI	protein_coding	YP_006073122.1	ElguCp058	2644	3450	587	1558	17703	3399	1085	918	182832561815419	246491955074162	169774081889531	414982741459093	12789237938993	210052316560645	293647127089123	267362079902235	-1142	0.4067	8233	0.7755	nonDE
12079407	gene-ElguCp059	petG	cytochrome b6/f complex subunit V	protein_coding	YP_006073123.1	ElguCp059	8497	13130	1907	3592	35833	12432	2861	2295	587567427286543	938098368151811	551548848659855	956750967471799	258869549267319	768276081047936	774308230969569	668405199755588	-0.8649	0.2856	9748	0.8375	nonDE
12079408	rna-ElguCp060	trnW-CCA	tRNA-Trp	tRNA	.	ElguCp060	233	314	69	140	614	319	122	97	161119466350199	224343402589237	199564082629942	372898483981213	443574088829107	197136478325524	33018386640436	282506772881447	-0.5445	0.221	4714	0.8799	nonDE
12079410	gene-ElguCp062	psaJ	photosystem I subunit IX	protein_coding	YP_006073124.1	ElguCp062	4477	5345	2702	4062	19792	11144	2531	2625	30958448534328	381883913006202	781481378646528	108193831566549	142984012477291	688679910488915	684996201532324	764515751354431	-1078	0.5389	9431	0.7218	nonDE
12079411	gene-ElguCp063	rpl33	50S ribosomal protein L33	protein_coding	YP_006073125.1	ElguCp063	874	1268	1057	1752	2311	2225	1037	1222	604370873777143	90594724357692	305709036724419	46665581709649	166954351674929	137501148675326	280656286443706	355900285011472	-0.7693	0.6846	7.58	0.6496	nonDE
12079412	gene-ElguCp064	rps18	ribosomal protein S18	protein_coding	YP_006073126.1	ElguCp064	2748	4186	1925	3958	7769	4248	2206	2634	190024160313454	299076905489983	556754868206723	105423728542689	561258484709011	262519046999005	59703738466231	767136948216217	-0.6266	0.39	8867	0.7828	nonDE
12079413	gene-ElguCp065	rpl20	ribosomal protein L20	protein_coding	YP_006073127.1	ElguCp065	425	881	667	1135	2024	1002	1060	1165	293887438621608	62944757223286	192911946542278	302314128084769	146220513972331	619218656056975	286881064252968	33929937155349	-1085	1204	7051	0.4297	nonDE
12079414	gene-ElguCp127	rps12	ribosomal protein S12	protein_coding	YP_006073128.1	ElguCp127	4298	6148	3180	4996	7144	6564	3343	3017	297206637928394	439255808636507	91973011994669	133071487569296	516106399119729	405643838159479	904757922450635	878683436890026	-0.3507	0.214	9312	0.8825	nonDE
12079415	gene-ElguCp066	clpP	clp protease proteolytic subunit	protein_coding	YP_006073129.1	ElguCp066	13456	14737	33162	44487	33350	26624	29747	26676	930482205668791	105291360635592	959122334517992	11849382040623	240931528704409	164531711565478	805080284748401	776922749833554	-0.6874	0.7784	11.81	0.6115	nonDE
12079416	gene-ElguCp069	psbN	photosystem II protein N	protein_coding	YP_006073132.1	ElguCp069	4306	3605	307	504	5384	3497	199	213	297759837812858	257566231316624	887915556049163	134243454233237	388958126100311	216108546929266	538578601757931	620349923956167	0.2626	0.05477	7231	0.9713	nonDE
12079417	gene-ElguCp070	psbH	photosystem II phosphoprotein	protein_coding	YP_006073133.1	ElguCp070	12913	20236	410	631	26094	29667	411	375	892933763510783	144580034866108	118581556345328	168070673851533	188511763418676	183336924842737	111234073026387	109216535907776	-0.628	0.1047	8735	0.9431	nonDE
12079418	gene-ElguCp071	petB	cytochrome b6	protein_coding	YP_006073134.1	ElguCp071	152024	0	9373	15184	0	218177	10103	9758	105124574044733	0	271089006737746	404435041483625	0	134829609503536	273430131334692	28419598863682	-0.07767	0.005185	7.97	0.9976	nonDE
12079419	gene-ElguCp072	petD	cytochrome b6/f complex subunit IV	protein_coding	YP_006073135.1	ElguCp072	76003	90539	3372	5862	140536	114774	4437	4013	525560635236661	646873481752451	975260995113283	156137922364134	101527896006005	70928345339604	120084083216077	116876255626108	-0.6242	0.1235	11.51	0.9326	nonDE
12079420	gene-ElguCp074	rps11	ribosomal protein S11	protein_coding	YP_006073137.1	ElguCp074	8873	9988	4760	8112	13436	14571	7128	6943	61356782185636	713612071675574	137670294683844	216068035861114	97066147516415	900462578583451	192913983584449	20221077568205	-0.6501	0.4435	10.23	0.7589	nonDE
12079421	gene-ElguCp075	rpl36	ribosomal protein L36	protein_coding	YP_006073138.1	ElguCp075	1190	1651	1052	2014	3600	1845	1528	1654	822884828140504	117958903718099	304262920183622	536441104812974	260076012994265	114017806429653	413541760545789	48171773437723	-0.8193	0.7231	7878	0.6358	nonDE
12079422	gene-ElguCp076	infA	translational initiation factor 1	protein_coding	YP_006073139.1	ElguCp076	4283	5273	2884	5460	7375	6415	3928	4428	296169388145023	376739733074219	834120020731527	145430408752673	532794609953528	396435896068413	106308379281666	128962885599902	-0.5815	0.4595	9382	0.7534	nonDE
12079423	gene-ElguCp077	rps8	ribosomal protein S8	protein_coding	YP_006073140.1	ElguCp077	4578	8063	5013	8709	12900	8150	6809	7325	316568633884641	576076705438541	144987644380275	231969492642313	931939046562781	503655892900633	184280487405515	213336300139855	-0.7259	0.6463	9988	0.6657	nonDE
12079424	gene-ElguCp078	rpl14	ribosomal protein L14	protein_coding	YP_006073141.1	ElguCp078	4327	6049	4668	8555	7675	6792	6300	7060	299211987509576	432182561230031	135009440248778	22786760931852	554467611036383	419733843506884	170504783471104	205618331602373	-0.5523	0.627	9763	0.678	nonDE
12079425	gene-ElguCp079	rpl16	50S ribosomal protein L16	protein_coding	YP_006073142.1	ElguCp079	6848	9629	7931	14186	10089	13163	10819	11428	473539101101359	687962618959161	22938300570117	377852706696964	728863026416426	813450615736324	29280813529744	33283375262775	-0.5466	0.6357	10.47	0.6727	nonDE
12079426	gene-ElguCp080	rps3	ribosomal protein S3	protein_coding	YP_006073143.1	ElguCp080	7425	10072	10333	18313	23379	18417	12953	13426	513438642768339	719613614929553	298854444321043	487777852653426	168897697438692	11381387214173	350563247666859	391024322959413	-0.9679	1011	10.86	0.5061	nonDE
12079427	gene-ElguCp081	rpl22	50S ribosomal protein L22	protein_coding	YP_006073144.1	ElguCp081	1403	2375	2893	4442	5710	4029	3298	3661	970174297379098	169686490811923	836723030504961	118315361846039	412509453943681	248985226073209	892579009345557	106624463455565	-1046	1297	8804	0.3966	nonDE
12079428	gene-ElguCp082	rps19	ribosomal protein S19	protein_coding	YP_006073145.1	ElguCp082	742	1048	1793	2860	3349	2751	2864	3435	513092892840549	748763967877454	518577391529691	761778331561622	241942935421609	170007038204864	775120158509907	100042346891523	-1467	2534	8174	0.1331	nonDE
12079429	rna-ElguCp083	trnH-GUG	tRNA-His	tRNA	.	ElguCp083	154	164	242	352	326	390	397	432	106490977759359	117172987339602	699920405745595	937573331152765	235513278433695	241013249363493	10744507783814	125817449365758	-0.9836	2069	5317	0.1912	nonDE
12079430	gene-ElguCp084	rpl2	ribosomal protein L2	protein_coding	YP_006073146.1	ElguCp084	4099	5628	5462	6996	8807	12032	8258	9104	283445790802347	402103398016633	15797377091663	186342699566612	636247068455691	743556773420911	223496587603869	265148624774504	-1072	1478	9955	0.3304	nonDE
12079431	gene-ElguCp085	rpl23	ribosomal protein L23	protein_coding	YP_006073147.1	ElguCp085	2120	2752	1316	1809	3705	4041	1730	1892	146597969383014	196621988511331	380617873537687	481838112515725	267661563373264	24972680530202	46821154826192	551033829166698	-0.7361	0.5157	8288	0.7301	nonDE
12079433	gene-ElguCp087	ycf2	hypothetical protein RF2	protein_coding	YP_006073148.1	ElguCp087	5396	7801	6642	10216	5811	4467	6280	7177	373133322071106	557357606241605	192102121279431	272109350882291	419806030974909	276052867924801	169963498444211	209025887522695	0.1072	0.1102	9821	0.9405	nonDE
12079436	gene-ElguCp090	ndhB	NADH dehydrogenase subunit 2	protein_coding	YP_006073149.1	ElguCp090	12052	19095	2639	3662	27217	18722	3246	2680	833395625945323	136427938612786	763260310232489	975395891670859	196624690157358	11569871934829	878505598646354	780534176620905	-0.581	0.1813	10.02	0.899	nonDE
12079437	rna-ElguCp093	trnV-GAC	tRNA-Val	tRNA	.	ElguCp093	161	173	46	60	177	56	35	35	111331476748421	12360321225458	133042721753295	159813635991949	127870706388847	346070306778349	947248797061688	101935433513924	1063	0.6046	3374	0.6893	nonDE
12079440	rna-ElguCp097	trnA-UGC	tRNA-Ala	tRNA	.	ElguCp097	3864	3741	0	288	3974	1789	250	0	267195544196211	267283015632591	0	767105452761353	287095021010891	110557103361869	676606283615492	0	0.2148	0.01899	4732	0.991	nonDE
12079442	rna-ElguCp009	trnG-UCC	tRNA-Gly	tRNA	.	ElguCp009	471	668	128	245	1120	680	94	118	3256964319783	477265582578377	370205834443951	652572346967123	809125373759934	420228229659424	254403962639425	343668032989801	-0.003922	0.001086	5421	0.9997	nonDE
12079443	gene-ElguCp104	ndhF	NADH dehydrogenase subunit 5	protein_coding	YP_006073151.1	ElguCp104	4050	5898	1625	3536	20000	6343	2648	2459	280057441510003	421394072761567	469987875758922	94183502811255	144486673885703	391986420695548	716661375605529	716169231459255	-1.03	0.4806	9211	0.7449	nonDE
12079444	gene-ElguCp111	ndhG	NADH dehydrogenase subunit 6	protein_coding	YP_006073157.1	ElguCp111	7197	10224	762	1580	43435	19505	1070	886	49767244606111	730473550341516	220388160817415	420842574778798	313788934011274	12053752381628	28958748938743	258042268838105	-1297	0.3269	9127	0.8152	nonDE
12079445	gene-ElguCp112	ndhI	NADH dehydrogenase subunit I	protein_coding	YP_006073158.1	ElguCp112	4356	7914	890	1734	38555	15730	1565	1143	301217337090759	565431110857078	25740874426181	461861408016731	278534185583163	972086772432756	423555533543298	332892001446901	-1584	0.4956	9089	0.7377	nonDE
12079446	gene-ElguCp113	ndhA	NADH dehydrogenase subunit 1	protein_coding	YP_006073159.1	ElguCp113	20668	23158	4074	7082	95780	60549	4419	4041	142919190151327	165456831756737	117829575744114	188633361682497	691946681238629	374182339377183	119596926691874	117691739094219	-1232	0.3801	10.91	0.788	nonDE
12079447	gene-ElguCp115	rps15	ribosomal protein S15	protein_coding	YP_006073161.1	ElguCp115	476	639	556	1149	1852	763	658	745	329153931256201	456545968963448	160808159336591	306043112924582	133794660018161	471520792985501	178082773847597	216976851336781	-0.7158	0.5976	6751	0.6938	nonDE
12079448	gene-ElguCp116	ycf1	hypothetical protein RF1	protein_coding	YP_006073162.1	ElguCp116	6928	8674	7939	18015	15196	5010	9451	10856	479071099946001	619730787916893	229614384347697	479840442065826	109780974818357	309609328028488	255784239458	316174590350617	-0.2457	0.1877	10.36	0.896	nonDE
12079453	rna-ElguCp121	rrn23	23S ribosomal RNA	rRNA	.	ElguCp121	311	2689	40	95	9095	129	46	9	215056455085459	192120831070847	115689323263735	253038256987252	657053149495232	797197670971555	12449555618525	262119686178662	0.7705	0.1281	4715	0.9301	nonDE
12079454	rna-ElguCp122	trnA-UGC	tRNA-Ala	tRNA	.	ElguCp122	4027	3935	259	287	4025	1872	253	447	278466991842169	281143722671544	749088368132682	764441892161487	290779431194976	115686359694477	684725559018878	130186110802069	-0.02745	0.005927	7114	0.9972	nonDE
12079455	rna-ElguCp123	trnI-GAU	tRNA-Ile	tRNA	.	ElguCp123	4922	4241	325	0	4763	2614	365	561	340356228916602	30300648738247	939975751517844	0	344095013858801	161540675342608	987845174078618	163387937718033	-3505	0.565	6256	0.7088	nonDE
12079457	gene-ElguCp011	atpA	ATP synthase CF1 alpha subunit	protein_coding	YP_006073089.1	ElguCp011	88967	99779	16011	17534	150725	148995	15174	11830	615206676514086	712890457546226	463075438693914	467028715580471	108888769607113	920763309972146	410672949903259	344541765277063	-0.5228	0.1422	12.51	0.9222	nonDE
12079458	gene-ElguCp013	atpH	ATP synthase CF0 subunit III	protein_coding	YP_006073091.1	ElguCp013	13342	13643	3098	4508	31371	28050	3910	3571	922599107315176	974750650167186	896013808677625	120073311841951	226634572323419	173344144734512	105821222757463	104003266593778	-0.9528	0.3503	10.22	0.8036	nonDE
12079459	gene-ElguCp016	rpoC2	RNA polymerase beta' subunit	protein_coding	YP_006073094.1	ElguCp016	12925	18746	9074	16194	18050	13369	13953	15421	89376356333748	133934440284645	262441229823782	431337003542269	130399223181847	826181059164241	377627499011478	44912752006235	-0.3364	0.2561	10.96	0.8617	nonDE
12079460	gene-ElguCp017	rpoC1	RNA polymerase beta subunit	protein_coding	YP_006073095.1	ElguCp017	11576	20660	15478	22629	22774	15863	15887	16597	800480232819703	147609385270498	447659836369021	602737128143634	164526975553649	980305942218742	429969761111973	483377825723028	-0.3255	0.265	11.22	0.8534	nonDE
12079461	gene-ElguCp018	rpoB	RNA polymerase beta subunit	protein_coding	YP_006073096.1	ElguCp018	7794	13297	5657	7846	13079	10655	6026	6877	538954987439251	95003000771627	163613625425737	208982964665471	944870603875552	658460556914877	163089178602678	200288564650073	-0.3447	0.2053	10.19	0.8864	nonDE
12079462	gene-ElguCp027	psbC	photosystem II CP43 chlorophyll apoprotein	protein_coding	YP_006073100.1	ElguCp027	289375	445509	2897	4419	448556	262623	2339	2939	200102770708536	318302563516333	837879923737598	11770274290807	324051822457376	162296468173304	633032838950654	855966397421208	-0.1257	0.01596	12.15	0.993	nonDE
12079465	gene-ElguCp032	rps14	ribosomal protein S14	protein_coding	YP_006073102.1	ElguCp032	66203	86885	3628	5676	84571	81425	2191	2573	457793649389796	620766768597639	104930216200207	151183699648383	610969124859387	503192405882627	592977746960617	749371058375219	-0.006713	0.00116	11.12	0.9997	nonDE
12079466	gene-ElguCp033	psaB	photosystem I P700 apoprotein A2	protein_coding	YP_006073103.1	ElguCp033	501621	631719	11807	17854	605211	525928	8023	11080	346870849056023	45134391700723	341485959943729	475552109500042	4372246219452	325014400541649	217136488537884	322698458095508	-0.05332	0.007867	13.46	0.9963	nonDE
12079469	rna-ElguCp039	trnL-UAA	tRNA-Leu	tRNA	.	ElguCp039	1467	1705	252	392	2057	1944	174	229	101443028813623	121817038667086	728842736561528	10441157551474	148604544091445	120135835067341	470917973396382	666948979276818	0.00566	0.001407	6.53	0.9997	nonDE
12079470	rna-ElguCp044	trnV-UAC	tRNA-Val	tRNA	.	ElguCp044	2452	2553	496	683	2973	3169	382	490	169555764588279	18240404675488	143454760847031	181921188970835	214779440731097	195838714675105	103385440136447	142709606919494	-0.1902	0.0559	7351	0.9706	nonDE
12079471	gene-ElguCp046	atpE	ATP synthase CF1 epsilon subunit	protein_coding	YP_006073110.1	ElguCp046	12113	13879	3222	4212	24870	22237	2882	3392	837613775064363	991612128833129	931877498889383	112189172466348	179669178976871	137420810925538	779991723751939	987899972797802	-0.687	0.2403	10.06	0.8671	nonDE
12079472	gene-ElguCp047	atpB	ATP synthase CF1 beta subunit	protein_coding	YP_006073111.1	ElguCp047	51114	67134	13610	17873	103836	101289	13039	13930	353453236181292	479651910491269	393632922404857	476058186014016	75014591347979	625948487558433	352890773282496	405703025385418	-0.6464	0.2136	12.18	0.8825	nonDE
12079473	gene-ElguCp048	rbcL	ribulose bisophosphate carboxylase	protein_coding	YP_006073112.1	ElguCp048	869907	1137398	66780	106103	1613726	1574020	62703	85027	601540564868253	812636106427367	193143325188805	282611770327562	11658095115144	972717114777245	169700975206169	247636117296812	-0.5623	0.1162	15.41	0.9369	nonDE
12079474	gene-ElguCp052	cemA	envelope membrane protein	protein_coding	YP_006073116.1	ElguCp052	8386	12675	1058	2125	35511	14782	1281	1824	579891778889602	905590008859421	305998260032578	566006627471485	256543313817759	913502013356707	346693059724578	531229230655422	-0.9946	0.2732	9382	0.8446	nonDE
12079475	gene-ElguCp053	petA	cytochrome f	protein_coding	YP_006073117.1	ElguCp053	29187	33167	3719	6093	44664	36928	4247	4902	201828062848209	236968077505644	107562148304457	162290747349824	322667640121551	228208648012694	1149418754606	142767855738645	-0.4804	0.1342	10.8	0.9255	nonDE
12079476	gene-ElguCp067	psbB	photosystem II CP47 chlorophyll apoprotein	protein_coding	YP_006073130.1	ElguCp067	233741	276848	8081	11886	408166	387609	8140	8087	161631867743184	197799434140207	23372135532356	31659081290005	294872738666158	239535652750088	220303005945204	235529100236315	-0.5539	0.09626	12.85	0.9471	nonDE
12079477	gene-ElguCp068	psbT	photosystem II protein T	protein_coding	YP_006073131.1	ElguCp068	3465	6392	219	442	17113	5886	240	239	239604699958558	456688862850447	633399044868947	117729378514069	123630022510301	363744611731672	649542032270872	696073388852224	-0.8441	0.1665	7567	0.9087	nonDE
12079478	gene-ElguCp091	rps7	ribosomal protein S7	protein_coding	YP_006073150.1	ElguCp091	7969	10997	6109	9459	12860	10569	5814	5336	551056234911905	785702037666829	176686518954539	251946197141307	929049313085067	653145905775067	157351557317619	155407849494371	-0.2462	0.1426	10.16	0.9222	nonDE
12079479	rna-ElguCp095	trnI-GAU	tRNA-Ile	tRNA	.	ElguCp095	4673	4068	324	0	4644	2551	364	554	323137882512653	290646166157012	937083518436251	0	335498056762601	157647384391352	985138748944156	161349229047754	-3513	0.5719	6227	0.7065	nonDE
12079480	rna-ElguCp098	rrn23	23S ribosomal RNA	rRNA	.	ElguCp098	310	2601	40	94	8820	135	48	9	214364955229879	185833500042868	115689323263735	250374696387386	637186231835948	834276632412092	129908406454174	262119686178662	0.7293	0.1211	4716	0.9333	nonDE
12079485	gene-ElguCp105	rpl32	ribosomal protein L32	protein_coding	YP_006073152.1	ElguCp105	2480	2796	808	2417	16114	2251	781	802	171491964183903	199765654025321	233692432992744	643782596987566	116412913149711	139107903671083	21137180300148	233577764794763	-0.665	0.2179	8145	0.8817	nonDE
12079487	gene-ElguCp107	ccsA	cytochrome c heme attachment protein	protein_coding	YP_006073153.1	ElguCp107	3211	3555	2374	4545	5927	4477	1261	1229	22204060362682	253993884141636	686616133570265	121058829263901	428186258060279	276670850615477	341280209455654	357938993681751	-0.03962	0.01585	8.65	0.9931	nonDE
12079488	gene-ElguCp108	ndhD	NADH dehydrogenase subunit 4	protein_coding	YP_006073154.1	ElguCp108	81151	102036	3422	6821	239345	127631	4276	3744	561159047801933	729016032694121	98972216052125	181681468516847	172910814805867	788737487936205	115726738749594	109041789450323	-0.7501	0.1426	11.67	0.9222	nonDE
12079489	gene-ElguCp109	psaC	photosystem I subunit VII	protein_coding	YP_006073155.1	ElguCp109	54912	51897	5201	8515	132206	103338	4549	3728	37971640069623	370788202680689	150425042573671	226802185078574	955100260386659	638610952890376	123115279366675	108575798897117	-0.6884	0.1558	11.46	0.9128	nonDE
12079490	gene-ElguCp110	ndhE	NADH dehydrogenase subunit 4L	protein_coding	YP_006073156.1	ElguCp110	2368	3568	251	756	18492	5550	315	320	163747165801404	254922694407133	725950503479935	201365181349855	133592378674721	342980393324971	85252391735552	93198110641302	-1276	0.3135	7619	0.8242	nonDE
12079491	gene-ElguCp114	ndhH	NADH dehydrogenase subunit 7	protein_coding	YP_006073160.1	ElguCp114	6551	8327	4311	6600	20864	20576	5063	5273	453001555390625	594938698522477	12468416814749	175794999591143	150728498197565	127156118433416	137026304557809	15357301169112	-1125	0.6804	10.12	0.65	nonDE
12079493	rna-ElguCp126	trnV-GAC	tRNA-Val	tRNA	.	ElguCp126	164	172	46	61	178	59	35	36	113405976315162	122888742819582	133042721753295	162477196591814	128593139758275	364609787498618	947248797061688	104847874471465	1045	0.5889	3395	0.6979	nonDE
12079494	gene-ElguCp128	rps7	ribosomal protein S7	protein_coding	YP_006073163.1	ElguCp128	7434	10657	6224	9503	12255	10428	6026	5363	514060992638362	761410076876911	180012586998371	253118163805248	885342094234642	644432349836541	163089178602678	156194208552907	-0.266	0.1623	10.14	0.9093	nonDE
12079496	gene-ElguCp129	ndhB	NADH dehydrogenase subunit 2	protein_coding	YP_006073164.1	ElguCp129	12569	18771	2633	3602	27149	19235	3247	2653	869146168478823	134113057643394	761524970383533	959414528071665	196133435466147	118868970551456	878776241159801	772670586035545	-0.5835	0.1812	10.02	0.899	nonDE
12079497	gene-ElguCp092	rps12	ribosomal protein S12	protein_coding	YP_006073083.1	ElguCp092	3866	5543	2956	4682	7557	6501	3210	2980	267333844167327	396030407819153	854944098918999	124707907285717	545942897277127	401750547208223	868762468162291	867907405347125	-0.4885	0.3134	9248	0.8242	nonDE
12079499	gene-ElguCp001	psbA	photosystem II protein D1	protein_coding	YP_006073084.1	ElguCp001	8695514	7507778	35992	50006	5953647	9049722	33153	28698	601294667519609	536407790574719	104097253072708	13319401135689	430111326259796	559257155142639	897261124828176	835812305995027	-0.1563	0.01742	16.16	0.9915	nonDE
12079501	rna-ElguCp002	trnK-UUU	tRNA-Lys	tRNA	.	ElguCp002	685	831	288	473	1307	973	392	416	473677401072475	593724100482981	832963127498889	125986416373653	944220413843066	601297158027382	106091865270909	121157543833693	-0.5831	0.3027	6368	0.8285	nonDE
12079502	gene-ElguCp132	ycf2	hypothetical protein RF2	protein_coding	YP_006073165.1	ElguCp132	5427	7879	6541	10087	5795	4417	6221	7077	375276971623404	562930467834586	189180965867022	268673357708464	418650137583823	272962954471423	168366707614879	206113446565155	0.1185	0.1213	9812	0.9333	nonDE
12079503	gene-ElguCp003	matK	maturase K	protein_coding	YP_006073085.1	ElguCp003	20754	45086	30196	55627	127216	45457	50237	58979	143513880027126	322125689463005	873338701317933	148165885488735	919050835252177	280916391700418	135962679479966	171772855234792	-1177	0.9217	12.69	0.5514	nonDE
12079505	gene-ElguCp134	rpl23	ribosomal protein L23	protein_coding	YP_006073166.1	ElguCp134	2108	2673	1334	1840	3672	3995	1774	1925	145768169556318	190977679974851	385823893084555	490095150375309	26527753325415	246884084924912	480119818853553	560644884326583	-0.7452	0.5392	8292	0.7218	nonDE
12079506	gene-ElguCp004	rps16	ribosomal protein S16	protein_coding	YP_006073086.1	ElguCp004	2738	3197	4882	9156	10239	4010	4051	4730	189332660457874	228415878368723	141198819043388	243875608523714	739699526957854	247811058960925	109637282197054	137758457291675	-0.6675	0.5874	9391	0.6981	nonDE
12079507	gene-ElguCp135	rpl2	ribosomal protein L2	protein_coding	YP_006073167.1	ElguCp135	4655	6377	7044	9097	11042	15427	10913	12154	321893182772609	455617158697951	203728898267437	242304107769793	797710926522964	953361896905285	295352174923834	353978073979495	-1184	1748	10.28	0.2529	nonDE
12079509	gene-ElguCp073	rpoA	RNA polymerase alpha subunit	protein_coding	YP_006073136.1	ElguCp073	5972	9362	5300	9183	17318	11296	8454	8089	412963713752528	668886285044726	153288353324448	244594769885677	12511101091763	698073247387185	228801180867415	235587349055466	-0.8797	0.7417	10.25	0.6297	nonDE
12079510	rna-ElguCp136	trnH-GUG	tRNA-His	tRNA	.	ElguCp136	151	155	239	347	314	384	389	404	104416478192619	110742762424623	691243706500814	924255528153436	226844078000553	23730535321944	105279937730571	117662614684644	-0.9643	2006	5273	0.1996	nonDE
12079511	gene-ElguCp137	rps19	ribosomal protein S19	protein_coding	YP_006073168.1	ElguCp137	717	1004	1777	2790	3125	2588	2756	2332	495805396451043	717327312737561	513949818599141	743133407362561	22576042794641	159933920346851	745890767057718	679181231298489	-1326	2.1	8054	0.1897	nonDE
12079512	gene-ElguCp006	psbK	photosystem II protein K	protein_coding	YP_006073087.1	ElguCp006	2433	2587	115	436	43888	4729	303	243	168241914862676	184833242833872	332606804383237	116131242154149	317061557174786	292244014420502	820046815741976	707723152682387	-2.27	0.5233	7397	0.7282	nonDE
12079513	gene-ElguCp007	psbI	photosystem II protein I	protein_coding	YP_006073088.1	ElguCp007	502	566	46	122	5728	1418	68	88	347132927501288	404389700208625	133042721753295	324954393183629	413809834008652	876299455378035	184036909143414	256294804263581	-1481	0.3394	5.41	0.8089	nonDE
105031928	XM_019847185,XM_019847213,XM_019847239	LOC105031928	regulator of telomere elongation helicase 1 homolog, transcript variant X2	protein_coding	XP_019702744.1		64	82	97	146	63	84	217	217	442559907571363	585864936698008	280546608914557	388879847580408	455133022739963	519105460167524	587294254178247	631999687786329	-0.6965	1666	3908	0.271	nonDE
105032035	XM_010906404,XM_010906474	LOC105032035	transmembrane 9 superfamily member 7, transcript variant X1	protein_coding	XP_010904706.1		306	335	954	909	222	238	1063	945	211598955807558	239347260724186	275919035984007	242117658527802	16038020801313	147079880380798	287692991793307	275225670487595	-0.02061	0.02284	6148	0.9891	nonDE
105032134	XM_010906491	LOC105032134	uncharacterized aarF domain-containing protein kinase 2	protein_coding	XP_010904793.1	.	65	85	189	163	107	98	438	444	449474906127166	607299019747935	546632052421146	434160377778127	773003705288509	605623036862111	118541420889434	129312378514807	-1135	2147	4435	0.1826	nonDE
105032155	gene-LOC105032155	LOC105032155	.	pseudogene	.	.	1223	982	5	5	956	1535	0	0	845704323374652	701608985167614	144611654079668	13317802999329	690646301173658	948603430187083	0	0	3101	0.2999	2596	0.829	nonDE
105032175	XM_010906547	LOC105032175	protein THYLAKOID FORMATION1, chloroplastic	protein_coding	XP_010904849.1	.	187	132	51	48	188	394	35	31	129310472993508	943099654196793	147503887161262	127850908793559	13581747345256	243485180126196	947248797061688	902856696837613	-0.08157	0.02378	3671	0.9886	nonDE
105032180	XM_010906559	LOC105032180	vesicle-associated protein 4-2	protein_coding	XP_010904861.1	.	119	55	208	308	85	15	162	109	822884828140504	392958189248664	60158448097142	820376664758669	614068364014236	0.926974036013436	438440871782839	317456064371935	0.7509	0.8098	3791	0.6008	nonDE
105032189	XM_010906569	LOC105032189	uncharacterized LOC105032189	protein_coding	XP_010904871.1	.	117	88	1008	757	109	125	232	277	809054831028899	628733102797862	291537094624611	201631537409842	787452372677079	77247836334453	627890631195176	806746145238771	0.7262	0.6163	4972	0.6839	nonDE
105032229	XM_010906648	LOC105032229	protein ROOT HAIR DEFECTIVE 3	protein_coding	XP_010904950.1	.	206	257	849	805	194	254	942	714	142448970249533	183618644794376	245550588627277	214416628289198	140152073669131	156967603431608	254945247666317	207948284368405	-0.1579	0.1961	5901	0.8925	nonDE
105032236	XM_010906620	LOC105032236	cyclic nucleotide-gated ion channel 4	protein_coding	XP_010904922.2	.	230	300	112	136	116	118	58	46	159044966783459	214340830499271	323930105138457	36224424158175	838022708537075	729219574997236	156972657798794	133972284046872	1404	1012	4.04	0.5061	nonDE
105032321	XM_010906740	LOC105032321	chlorophyll a-b binding protein 13, chloroplastic	protein_coding	XP_010905042.1	.	474	495	0	0	1224	957	0	0	327770931545041	353662370323798	0	0	884258444180499	591409434976572	0	0	0.3221	0.02971	1397	0.9863	nonDE
105032329	XM_019853888,XM_029260905,XM_029260907,XM_029260909,XM_029260914,XM_029260924,XM_029260929,XM_029260933	LOC105032329	myosin-2, transcript variant X5	protein_coding	XP_019709447.1		6	41	154	255	31	0	250	159	0.414899913348153	292932468349004	445403894565378	679207952965781	223954344522839	0	676606283615492	463078112248969	0.3552	0.0945	2472	0.948	nonDE
105032337	XM_010906762,XM_010906770,XM_029260944	LOC105032337	sphingosine kinase 1, transcript variant X1	protein_coding	XP_010905064.1		32	30	127	168	55	12	399	219	221279953785682	214340830499271	367313601362358	447478180777456	397338353185682	0.741579228810749	107986362865032	637824569701411	-0.5809	0.3097	3421	0.8247	nonDE
105032350	XM_010906787	LOC105032350	B3 domain-containing protein Os07g0563300	protein_coding	XP_010905089.1	.	197	180	261	291	140	67	546	416	13622547154931	128604498299563	754872834295869	775096134560951	101140671719992	414048402752668	147770812341623	121157543833693	-0.2152	0.2225	4939	0.8792	nonDE
105032371	XM_010906818	LOC105032371	uncharacterized LOC105032371	protein_coding	XP_010905120.1	.	3	0	242	124	8	0	65	61	0.207449956674077	0	699920405745595	33028151438336	0.57794669554281	0	175917633740028	177658898409982	0.6874	0.1287	0.8651	0.9299	nonDE
105032379	XM_010906828	LOC105032379	ADP-ribosylation factor GTPase-activating protein AGD5	protein_coding	XP_010905130.1	.	74	45	194	189	78	100	362	245	511709893129389	321511245748907	561093217829113	503412953374638	56349802815424	617982690675624	979725898675232	713548034597469	-0.7976	1494	4181	0.3237	nonDE
105032387	XM_010906865,XR_829819	LOC105032387	SWR1-complex protein 4, transcript variant X2	protein_coding	XP_010905167.1	.	68	79	248	141	131	99	207	199	470219901794573	564430853648081	717273804235155	375562044581079	946387713951352	611802863768868	560230002833627	579575750550597	-0.5041	1018	4212	0.5016	nonDE
105032429	XM_010906881,XM_010906889	LOC105032429	transmembrane protein 184C, transcript variant X1	protein_coding	XP_010905183.1		221	201	180	234	103	206	209	172	152821468083236	143608356434512	520601954686806	623273180368599	744106370511368	127304434279179	565642853102551	500939844696998	0.1247	0.1304	4688	0.9291	nonDE
105032478	XM_010906936	LOC105032478	receptor-like protein kinase THESEUS 1	protein_coding	XP_010905238.1	.	24	100	189	197	110	192	81	131	165959965339261	714469434997571	546632052421146	524721438173564	794676706371364	11865267660972	219220435891419	38152976543783	-0.2735	0.1741	3924	0.906	nonDE
105032482	XM_010907286,XM_010907998,XM_010908717	LOC105032482	uncharacterized LOC105032482, transcript variant X1	protein_coding	XP_010905588.1		126	60	116	69	45	0	62	90	871289818031121	428681660998542	33549903746483	183785681390741	325095016242831	0	167798358336642	262119686178662	1321	0.4912	2503	0.7411	nonDE
105032521	XM_010906985,XM_029260995	LOC105032521	secretory carrier-associated membrane protein 2, transcript variant X1	protein_coding	XP_010905287.1		85	111	363	379	103	183	568	549	587774877243217	793061072847304	104988060861839	100948946734914	744106370511368	113090832393639	15372494763744	159893008568984	-0.7242	1.08	4991	0.477	nonDE
105032531	XM_010907008,XM_029260996,XM_029260999	LOC105032531	brefeldin A-inhibited guanine nucleotide-exchange protein 5, transcript variant X2	protein_coding	XP_010905310.1		1395	1470	3525	3435	1217	1240	3763	3201	964642298534456	105027006944643	101951216126166	914933066053906	8792014105945	766298536437774	101842777809804	932272350508774	-0.06383	0.122	8214	0.9332	nonDE
105032557	XM_010907050,XM_010907059,XM_029261001,XM_029261004,XM_029261010	LOC105032557	uncharacterized LOC105032557, transcript variant X3	protein_coding	XP_010905352.1		42	27	125	193	63	59	328	280	290429939343707	192906747449344	361529135199171	514067195774101	455133022739963	364609787498618	887707444103525	815483468111393	-0.8961	1051	3788	0.4885	nonDE
105032602	XM_010907088,XM_010907095,XM_010907103,XM_010907109,XM_010907115,XM_010907124,XM_010907132,XM_010907137,XM_010907153,XM_019846001,XM_019846009	LOC105032602	protein STRUBBELIG-RECEPTOR FAMILY 3, transcript variant X2	protein_coding	XP_010905390.1		47	26	94	50	193	139	40	108	32500493212272	185762053099368	271869909669776	13317802999329	139429640299703	858995940039117	108257005378479	314543623414394	-0.9498	0.5064	3313	0.7342	nonDE
105032618	XM_010907141	LOC105032618	polyamine oxidase 1	protein_coding	XP_010905443.1	.	16	62	258	338	24	9	489	499	110639976892841	442971049698494	746196135051088	900283482754644	173384008662843	0.556184421608061	13234418907519	14533080378128	-0.471	0.1631	3.67	0.9092	nonDE
105032681	XM_010907191,XM_010907207,XM_029261034	LOC105032681	helicase-like transcription factor CHR28, transcript variant X1	protein_coding	XP_010905493.1		301	258	831	878	391	343	2415	2431	208141456529657	184333114229373	240344569080409	233860620668218	282471447446548	211968062901739	653601669972565	708014396778141	-1053	1356	6552	0.3738	nonDE
105032745	XM_010907327	LOC105032745	pathogen-associated molecular patterns-induced protein A70	protein_coding	XP_010905629.2	.	10	7	99	168	8	1	219	108	0.691499855580255	0.5001286044983	286331075077743	447478180777456	0.57794669554281	0.0617982690675624	592707104447171	314543623414394	0.03535	0.009771	1964	0.9962	nonDE
105032935	XM_010907541	LOC105032935	mitochondrial substrate carrier family protein B	protein_coding	XP_010905843.1	.	53	59	93	104	67	38	128	101	366494923457535	421536966648567	268977676588183	277010302386044	484030357517103	234833422456737	346422417211132	29415653671161	-0.241	0.4431	3384	0.7591	nonDE
105032958	XM_010907571,XM_010907580	LOC105032958	ras-related protein Rab2BV, transcript variant X1	protein_coding	XP_010905873.1		99	58	346	336	44	141	157	185	684584857024453	414392272298591	10007126462313	894956361554912	317870682548546	87135559385263	424908746110529	538801577145027	0.362	0.3805	4245	0.788	nonDE
105032978	XM_010907588	LOC105032978	26S proteasome non-ATPase regulatory subunit 14 homolog	protein_coding	XP_010905890.1	.	158	228	545	664	119	182	281	258	10925697718168	162899031179446	157626702946838	17686042383109	85969570961993	112472849702964	760505462783813	751409767045498	0.6272	1351	5168	0.3755	nonDE
105033009	XM_010907634	LOC105033009	uncharacterized LOC105033009	protein_coding	XP_010905936.2	.	0	7	61	50	8	0	63	48	0	0.5001286044983	176426217977195	13317802999329	0.57794669554281	0	170504783471104	139797165961953	-0.2546	0.05031	0.544	0.9732	nonDE
105033022	XM_010907656,XM_010907665	LOC105033022	phosphatidylinositol:ceramide inositolphosphotransferase, transcript variant X1	protein_coding	XP_010905958.1		30	46	344	407	63	52	395	651	207449956674077	328655940098883	994928180068118	108406916414538	455133022739963	321350999151324	106903792811248	189599906335899	-0.6996	0.3983	4302	0.7793	nonDE
105033039	XM_010907683	LOC105033039	uncharacterized LOC105033039	protein_coding	XP_010905985.1	.	27	9	100	121	62	25	66	81	186704961006669	0.643022491497814	289223308159337	322290832583763	447908689045678	154495672668906	17862405887449	235907717560796	0.1726	0.1413	2727	0.9222	nonDE
105033063	XM_010907744,XM_010907879,XM_029263406	LOC105033063	ATP-dependent zinc metalloprotease FTSH 5, mitochondrial, transcript variant X3	protein_coding	XP_010906046.1		411	363	307	346	140	197	270	258	284206440643485	259352404904118	887915556049163	92159196755357	101140671719992	121742590063098	730734786304731	751409767045498	0.5522	0.8002	5239	0.6021	nonDE
105033081	XM_010907739,XM_010907749,XM_029261115	LOC105033081	alpha N-terminal protein methyltransferase 1, transcript variant X1	protein_coding	XP_010906041.1		40	27	82	51	13	15	47	54	276599942232102	192906747449344	237163112690656	135841590593156	0.939163380257066	0.926974036013436	127201981319712	157271811707197	0.408	0.3696	2299	0.7925	nonDE
105033202	XM_010907891,XM_010907900,XR_829945	LOC105033202	carnosine N-methyltransferase, transcript variant X1	protein_coding	XP_010906193.1		129	125	274	258	36	39	110	90	892034813698529	893086793746964	792471864356582	687198634765379	260076012994265	241013249363493	297706764790816	262119686178662	1311	3838	3882	0.06098	nonDE
105033213	XM_010907918,XM_010907926	LOC105033213	dihydroceramide fatty acyl 2-hydroxylase FAH1, transcript variant X1	protein_coding	XP_010906220.1		38	18	170	129	35	33	110	137	262769945120497	128604498299563	491679623870872	343599317382689	252851679299979	203934287922956	297706764790816	399004411183074	0.005881	0.00463	3148	0.9979	nonDE
105033235	XM_010907949	LOC105033235	tubulin beta chain	protein_coding	XP_010906251.1	.	74	154	793	905	111	210	618	865	511709893129389	110028292989626	229354083370354	241052234287856	801901040065649	129776365041881	16725707330975	25192614282727	-0.2951	0.1883	5458	0.896	nonDE
105033250	XM_010907972,XM_010907980	LOC105033250	actin-depolymerizing factor, transcript variant X1	protein_coding	XP_010906274.1		812	596	1024	964	534	515	515	512	561497882731167	425823783258552	296164667555161	256767241827064	385779419274826	318261085697946	139380894424791	149116977026083	0.5302	0.8204	6507	0.5945	nonDE
105033264	XM_010907993,XM_010908009	LOC105033264	nucleolar complex protein 2 homolog, transcript variant X1	protein_coding	XP_010906295.1		116	90	108	135	38	58	127	89	802139832473096	643022491497814	312361172812084	359580680981884	274524680382835	358429960591862	34371599207667	259207245221121	0.3784	0.6244	3624	0.6794	nonDE
105033298	XM_010908065	LOC105033298	WD-40 repeat-containing protein MSI4	protein_coding	XP_010906367.1	.	119	100	364	275	60	148	287	202	822884828140504	714469434997571	105277284169999	732479164963098	433460021657108	914614382199923	776744013590584	588313073423219	0.1291	0.1766	4537	0.9024	nonDE
105033366	XM_010908161,XM_010908245,XM_019853186,XM_029263417	LOC105033366	zinc finger CCCH domain-containing protein 59, transcript variant X1	protein_coding	XP_010906463.1		73	99	150	160	71	70	177	177	504794894573586	707324740647595	433834962239005	42616969597853	512927692294244	432587883472937	479037248799768	515502049484702	-0.1731	0.3888	3976	0.783	nonDE
105033399	XM_010908177,XM_010908184,XM_019848673	LOC105033399	GDP-L-galactose phosphorylase 2, transcript variant X3	protein_coding	XP_010906479.1		84	108	143	98	93	132	125	118	580859878687414	771626989797377	413589330667851	261028938786849	671863033568517	815737151691823	338303141807746	343668032989801	-0.2789	0.3426	3947	0.8069	nonDE
105033414	XM_010908207	LOC105033414	photosystem II 10 kDa polypeptide, chloroplastic	protein_coding	XP_010906509.1	.	309	177	0	0	450	632	0	0	213673455374299	12646108999457	0	0	325095016242831	390565060506994	0	0	0.02493	0.002356	0.8792	0.9995	nonDE
105033471	XM_010908302	LOC105033471	patatin-like protein 3	protein_coding	XP_010906604.1	.	0	0	131	144	6	18	175	243	0	0	378882533688731	383552726380677	0.433460021657108	111236884321612	473624398530844	707723152682387	-2618	0.5377	1459	0.7223	nonDE
105033480	XM_010908312,XR_002165084	LOC105033480	renalase, transcript variant X2	protein_coding	XP_010906614.2	.	57	62	90	131	42	60	84	69	394154917680745	442971049698494	260300977343403	348926438582421	303422015159975	370789614405374	227339711294805	200958426070308	0.3295	0.6167	3296	0.6835	nonDE
105033490	XM_010908362,XM_010908429,XM_019853199,XM_029263422,XM_029263427,XM_029263439,XM_029263442,XM_029263447,XM_029263451,XM_029263455,XM_029263457,XM_029263458,XM_029263459,XM_029263461,XM_029263462,XM_029263466,XM_029263467	LOC105033490	proline-rich protein 36, transcript variant X3	protein_coding	XP_010906664.1		95	59	142	196	59	57	239	156	656924862801242	421536966648567	410697097586258	522057877573699	426235687962822	352250133685106	64683560713641	454340789376347	-0.1572	0.2312	3918	0.8713	nonDE
105033498	XM_010908328	LOC105033498	DEAD-box ATP-dependent RNA helicase 53	protein_coding	XP_010906630.1	.	105	178	232	167	94	46	147	118	726074848359268	127175559429568	670998074929661	44481462017759	679087367262802	284272037710787	397844494765909	343668032989801	0.647	1143	4102	0.4536	nonDE
105033504	XM_010908342,XM_010908353,XM_019849593,XM_029261180,XM_029261182,XR_829989	LOC105033504	actin-related protein 7, transcript variant X1	protein_coding	XP_010906644.1		38	24	129	89	51	35	112	83	262769945120497	171472664399417	373098067525544	237056893388057	368441018408541	216293941736468	30311961505974	241732599475877	-0.0864	0.1004	3073	0.9457	nonDE
105033518	XM_010908377	LOC105033518	septin and tuftelin-interacting protein 1 homolog 1	protein_coding	XP_010906679.1	.	47	71	124	101	42	13	70	81	32500493212272	507273298848275	358636902117577	269019620586447	303422015159975	0.803377497878311	189449759412338	235907717560796	0.5724	0.894	3022	0.5591	nonDE
105033603	XM_010908474,XM_019854853,XM_019854883,XM_019854908	LOC105033603	lysine-specific demethylase JMJ18, transcript variant X3	protein_coding	XP_010906776.1		31	23	73	55	34	55	53	56	214364955229879	164327970049441	211133014956316	14649583299262	245627345605694	339890479871593	143440532126484	163096693622279	-0.04525	0.04542	2645	0.9758	nonDE
105033626	XM_010908513,XM_029261220,XM_029261221,XM_029261224	LOC105033626	transcription factor PIF4, transcript variant X3	protein_coding	XP_010906815.1		208	227	13	21	164	798	22	6	143831969960693	162184561744449	375990300607138	55934772597182	118479072586276	493150187159148	595413529581633	174746457452441	0.03206	0.006866	3135	0.9967	nonDE
105033638	XM_010908522	LOC105033638	uncharacterized oxidoreductase At1g06690, chloroplastic	protein_coding	XP_010906824.1	.	1143	1011	52	62	490	655	83	46	790384334928232	722328598782544	150396120242855	16514075719168	353992351019971	404778662392534	224633286160343	133972284046872	0.2464	0.05336	4901	0.9713	nonDE
105033689	XM_010908587	LOC105033689	F-box/LRR-repeat protein At3g48880	protein_coding	XP_010906889.1	.	26	17	142	111	57	75	171	110	179789962450866	121459803949587	410697097586258	295655226585105	411787020574252	463487018006718	462798697992996	320368505329476	-0.5241	0.7442	3284	0.6293	nonDE
105033710	XM_010908646,XM_010908718	LOC105033710	developmentally-regulated G-protein 2, transcript variant X1	protein_coding	XP_010906948.1		271	223	802	546	113	128	634	444	187396460862249	159326684004458	231957093143788	145430408752673	816349707454219	791017844064798	171587353524889	129312378514807	0.4306	0.66	5467	0.6575	nonDE
105033760	XM_010908674,XM_019853789,XM_029261250,XM_029261252,XM_029261255,XM_029261257,XM_029261260,XR_003798862,XR_003798863,XR_003798864	LOC105033760	uncharacterized LOC105033760, transcript variant X5	protein_coding	XP_010906976.1		286	241	303	264	95	45	238	227	197768958695953	172187133834415	87634662372279	703179998364574	686311700957087	278092210804031	644129182001948	661124097361736	0.8532	1.31	4669	0.3905	nonDE
105033782	XM_010908705,XM_019849712	LOC105033782	subtilisin-like protease SBT2.2, transcript variant X1	protein_coding	XP_010907007.1		11	7	111	119	12	0	98	161	0.760649841138281	0.5001286044983	321037872056864	316963711384031	0.866920043314215	0	265229663177273	468902994164051	0.4729	0.1322	1738	0.9267	nonDE
105033839	XM_010908779	LOC105033839	vacuolar protein sorting-associated protein 53 A	protein_coding	XP_010907081.1	.	422	432	710	619	350	286	534	508	291812939054868	308650795918951	205348548793129	164874401131694	252851679299979	176743049533228	144523102180269	147952000643067	0.2183	0.5081	6008	0.7331	nonDE
105033844	XM_010908789	LOC105033844	probable protein NAP1	protein_coding	XP_010907091.1	.	201	229	766	890	299	146	728	901	138991470971631	163613500614444	221545054050052	237056893388057	216007577459125	902254728386411	197027749788831	262410930274416	-0.1461	0.1366	5849	0.9247	nonDE
105033866	XM_010908826,XM_010908834,XM_019846598,XM_029261280	LOC105033866	probable UDP-arabinose 4-epimerase 1, transcript variant X2	protein_coding	XP_010907128.1		121	198	862	928	284	302	672	1030	836714825252109	141464948129519	249310491633348	247178423667547	205171076917698	186630772584038	181871769035844	299981418626691	-0.5357	0.5747	5892	0.7051	nonDE
105033889	XM_010908861	LOC105033889	protein PAT1 homolog 1	protein_coding	XP_010907163.1	.	256	302	374	331	231	147	553	419	177023963028545	215769769369266	108169517251592	881638558555583	166882108337986	908434555293167	149665309935747	122031276120955	-0.1612	0.2519	5402	0.8622	nonDE
105033893	XM_010908902,XM_019853946	LOC105033893	protein indeterminate-domain 7, transcript variant X1	protein_coding	XP_010907204.1		190	106	45	88	108	161	71	83	131384972560248	757337601097425	130150488671701	234393332788191	780228038982794	994952131987754	1921561845468	241732599475877	-0.2785	0.1454	3762	0.9206	nonDE
105033957	XM_010908946	LOC105033957	chloroplast stem-loop binding protein of 41 kDa a, chloroplastic	protein_coding	XP_010907248.1	.	886	500	24	30	208	229	12	20	612668872044106	357234717498785	694135939582408	799068179959743	150266140841131	141518036164718	324771016135436	582488191508138	2226	0.5816	3628	0.7009	nonDE
105034007	XM_010909030	LOC105034007	UPF0613 protein PB24D3.06c	protein_coding	XP_010907332.1	.	217	198	100	141	58	71	82	94	150055468660915	141464948129519	289223308159337	375562044581079	419011354268537	438767710379693	221926861025881	273769450008825	0.9039	0.8438	3915	0.5852	nonDE
105034097	XM_010909124	LOC105034097	stem-specific protein TSJT1	protein_coding	XP_010907426.1	.	307	209	312	387	187	573	255	159	212290455663138	149324111914492	90237672145713	103079795214807	135095040083132	354104081757132	690138409287802	463078112248969	0.1104	0.07434	5257	0.9586	nonDE
105034121	XM_029262430	LOC105034121	cold-responsive protein kinase 1	protein_coding	XP_029118263.1	.	7	33	98	76	22	0	269	256	0.484049898906179	235774913549198	28343884199615	202430605589802	158935341274273	0	728028361170269	745584885130416	-0.938	0.3239	2199	0.8159	nonDE
105034203	XM_010909261,XM_029261343	LOC105034203	oligopeptide transporter 3, transcript variant X1	protein_coding	XP_010907563.1		802	850	1098	1290	341	382	1677	1299	554582884175365	607299019747935	317567192358952	343599317382689	246349778975123	236069387838088	453867495049272	378326080384535	0.2847	0.4616	6879	0.753	nonDE
105034212	XM_010909267	LOC105034212	mitochondrial import inner membrane translocase subunit TIM50	protein_coding	XP_010907569.1	.	148	99	118	156	90	46	104	94	102341978625878	707324740647595	341283503628017	415515453579066	650190032485661	284272037710787	281468213984045	273769450008825	0.5804	0.894	3813	0.5591	nonDE
105034220	XM_010909276	LOC105034220	transcriptional adapter ADA2	protein_coding	XP_010907578.1	.	332	226	700	592	135	277	563	449	229577952052645	161470092309451	202456315711536	157682787512056	975285048728492	171181205317148	152371735070209	130768598993577	0.2314	0.4709	5648	0.7502	nonDE
105034243	XM_010909311	LOC105034243	putative DUF21 domain-containing protein At3g13070, chloroplastic	protein_coding	XP_010907613.1	.	29	61	90	92	51	52	114	97	200534958118274	435826355348518	260300977343403	245047575187654	368441018408541	321350999151324	308532465328664	282506772881447	-0.3707	0.7596	3234	0.6221	nonDE
105034271	XM_010909355	LOC105034271	40S ribosomal protein S19	protein_coding	XP_010907657.1	.	201	144	568	475	91	113	326	261	138991470971631	10288359863965	164278839034503	126519128493626	657414366179946	698320440463455	882294593834601	76014708991812	0.6016	1358	4971	0.3738	nonDE
105034280	XM_010909365	LOC105034280	40S ribosomal protein S19	protein_coding	XP_010907667.1	.	502	421	1353	1128	213	316	826	707	347132927501288	300791632133977	391319135939582	300449635664863	153878307688273	195282530253497	223550716106558	205909575698127	0.5495	1.47	6326	0.3312	nonDE
105034289	XM_010909378,XM_029261370	LOC105034289	chitin-inducible gibberellin-responsive protein 2, transcript variant X1	protein_coding	XP_010907680.1		144	169	204	255	258	299	480	303	995759792035567	120745334514589	590015548645047	679207952965781	186387809312556	184776824512012	129908406454174	882469610134829	-0.9656	2217	5102	0.172	nonDE
105034339	XM_010909465,XM_010909473	LOC105034339	uncharacterized LOC105034339, transcript variant X1	protein_coding	XP_010907767.1		71	90	122	139	50	57	156	151	490964897461981	643022491497814	352852435954391	370234923381348	361216684714256	352250133685106	422202320976067	439778584588644	-0.1056	0.1883	3741	0.896	nonDE
105034362	gene-LOC105034362	LOC105034362	.	pseudogene	.	.	87	60	144	120	33	70	204	129	601604874354822	428681660998542	416481563749445	319627271983897	238403011911409	432587883472937	552110727430241	375704883522749	-0.196	0.2972	3691	0.8298	nonDE
105034417	XM_010909589,XM_010909615,XM_019848426,XM_019848430,XM_029262389,XM_029262390,XM_029262391,XM_029262393,XM_029262394,XM_029262395,XM_029262396,XM_029262397,XM_029262398,XM_029262399,XM_029262400	LOC105034417	uncharacterized protein At5g08430, transcript variant X4	protein_coding	XP_010907891.1		72	61	158	209	43	64	91	105	497879896017784	435826355348518	456972826891752	556684165371954	31064634885426	395508922032399	246284687236039	305806300541772	0.5231	1094	3625	0.4713	nonDE
105034475	XM_029262388	LOC105034475	pentatricopeptide repeat-containing protein At1g10270-like	protein_coding	XP_029118221.1	.	75	52	83	61	26	31	78	73	518624891685191	371524106198737	240055345772249	162477196591814	187832676051413	191574634109443	211101160488033	21260818990047	0.0245	0.02572	2956	0.9881	nonDE
105034500	XM_010909694,XM_010909700,XM_019848684,XM_019848685	LOC105034500	uncharacterized LOC105034500, transcript variant X1	protein_coding	XP_010907996.1		48	39	53	77	32	52	48	73	331919930678522	278643079649053	153288353324448	205094166189667	231178678217124	321350999151324	129908406454174	21260818990047	0.01064	0.01031	2828	0.9959	nonDE
105034513	XM_010909708,XM_010909717	LOC105034513	leucine--tRNA ligase, cytoplasmic, transcript variant X1	protein_coding	XP_010908010.1		628	556	1297	1158	420	445	1533	1135	4342619093044	397245005858649	37512263068266	308440317464461	303422015159975	275002297350653	414894973113019	330562048680868	-0.006858	0.01247	6794	0.995	nonDE
105034573	XM_010909787	LOC105034573	KH domain-containing protein At1g09660/At1g09670	protein_coding	XP_010908089.1	.	330	397	1652	1423	363	658	1277	1226	228194952341484	283644365694036	477796905079224	379024673360905	26224331310255	40663261046456	345610489670793	357065261394488	-0.2648	0.3468	6723	0.805	nonDE
105034592	XM_010909807	LOC105034592	fructokinase-2	protein_coding	XP_010908109.1	.	45	21	140	157	82	61	236	261	311174935011115	15003858134949	404912631423071	418179014178932	59239536293138	376969441312131	638716331733024	76014708991812	-0.8525	1212	3.72	0.4281	nonDE
105034616	XM_019847963	LOC105034616	protein root UVB sensitive 6	protein_coding	XP_019703522.1	.	19	43	71	61	94	95	61	66	131384972560248	307221857048955	205348548793129	162477196591814	679087367262802	587083556141843	16509193320218	192221103197685	-0.5379	0.4645	3017	0.7525	nonDE
105034646	XM_010909870,XM_010909879,XM_029262377,XM_029262379,XM_029262382,XM_029262383	LOC105034646	PHD finger protein ALFIN-LIKE 5, transcript variant X1	protein_coding	XP_010908172.1		25	49	101	87	31	39	136	54	172874963895064	35009002314881	29211554124093	231729772188325	223954344522839	241013249363493	368073818286827	157271811707197	-0.0665	0.063	2966	0.9654	nonDE
105034762	XM_010910034	LOC105034762	guanosine nucleotide diphosphate dissociation inhibitor 1	protein_coding	XP_010908336.1	.	562	563	1560	2005	362	577	1617	1581	388622918836103	402246291903632	451188360728565	534043900273095	261520879733122	356576012519835	4376289442425	460456915387183	0.02596	0.03137	6998	0.9851	nonDE
105034802	XM_010910097,XR_002163654	LOC105034802	poly(ADP-ribose) glycohydrolase 1, transcript variant X1	protein_coding	XP_010908399.1	.	40	46	67	86	32	43	91	53	276599942232102	328655940098883	193779616466756	22906621158846	231178678217124	265732556990518	246284687236039	154359370749656	-0.008943	0.01049	2.91	0.9959	nonDE
105034829	XM_029262351,XM_029262352,XM_029262353	LOC105034829	tryptophan--tRNA ligase, cytoplasmic, transcript variant X1	protein_coding	XP_029118184.1		64	67	119	72	17	31	89	53	442559907571363	478694521448372	344175736709611	191776363190338	122813672802847	191574634109443	240871836967115	154359370749656	0.4743	0.6066	2959	0.6872	nonDE
105034839	XM_010910150,XM_019848586,XR_002164037,XR_830236,XR_830237,XR_830245	LOC105034839	inositol-tetrakisphosphate 1-kinase 6, transcript variant X3	protein_coding	XP_010908452.1		95	68	119	126	28	27	57	48	656924862801242	485839215798348	344175736709611	335608635583092	202281343439984	166855326482418	154266232664332	139797165961953	1223	2379	3098	0.1526	nonDE
105034884	XM_010910204	LOC105034884	probable thiol methyltransferase 2	protein_coding	XP_010908506.2	.	123	173	107	161	53	77	72	107	850544822363714	12360321225458	30946893973049	428833256578395	382889685797112	47584667182023	194862609681262	311631182456854	0.773	0.943	3823	0.5431	nonDE
105034893	XM_019848611,XM_029262347	LOC105034893	beta-hexosaminidase 3, transcript variant X2	protein_coding	XP_019704170.1		0	18	79	127	87	0	62	271	0	128604498299563	228486413445876	338272196182958	628517031402806	0	167798358336642	789271499493527	-0.8606	0.1732	1648	0.906	nonDE
105034901	XM_010910224	LOC105034901	ankyrin repeat-containing protein At5g02620	protein_coding	XP_010908526.1	.	258	213	212	313	172	146	504	341	178406962739706	152181989654483	613153413297794	833694467757998	124258539541704	902254728386411	136403826776883	993142366521375	-0.3158	0.5097	5.12	0.732	nonDE
105034905	XM_029263502	LOC105034905	mitochondrial carrier protein CoAc1	protein_coding	XP_029119335.1	.	63	91	149	150	118	88	193	114	435644909015561	650167185847789	430942729157412	399534089979871	852471375925645	543824767794549	52234005095116	332018269159638	-0.3394	0.5957	3.99	0.6942	nonDE
105034932	XM_010910282,XM_010910290,XM_019848664	LOC105034932	probably inactive leucine-rich repeat receptor-like protein kinase At5g48380, transcript variant X3	protein_coding	XP_010908584.1		145	232	371	400	275	284	647	501	100267479059137	165756908919436	107301847327114	106542423994632	198669176592841	175507084151877	175105706199689	145913291972788	-0.7609	2484	5495	0.1416	nonDE
105034979	XM_010910382	LOC105034979	IQ domain-containing protein IQM1	protein_coding	XP_010908684.1	.	8	32	92	112	105	256	530	332	0.553199884464204	228630219199223	26608544350659	298318787184971	758555037899938	15820356881296	143440532126484	966930397903509	-2349	2754	3847	0.1165	nonDE
105035012	XM_010910403,XM_010910410,XM_010910414	LOC105035012	sister chromatid cohesion 1 protein 4, transcript variant X1	protein_coding	XP_010908705.1		203	186	188	316	207	134	220	261	140374470682792	132891314909548	543739819339553	841685149557596	149543707471702	828096805505336	595413529581633	76014708991812	-0.04804	0.05271	4854	0.9715	nonDE
105035033	XM_010910425	LOC105035033	acyl-coenzyme A thioesterase 9, mitochondrial	protein_coding	XP_010908727.1	.	175	203	111	122	81	101	31	58	121012474726545	145037295304507	321037872056864	324954393183629	585171029237095	62416251758238	83899179168321	16892157553736	1648	1419	3736	0.3472	nonDE
105035041	XM_010910433	LOC105035041	formin-like protein 1	protein_coding	XP_010908735.1	.	12	71	77	78	165	154	56	178	0.829799826696306	507273298848275	222701947282689	207757726789533	119201505955705	951693343640461	15155980752987	518414490442243	-1265	0.8046	3436	0.6021	nonDE
105035046	XM_010910442,XM_010910449	LOC105035046	beta-glucosidase 4, transcript variant X1	protein_coding	XP_010908744.1		254	281	235	235	183	150	51	71	175640963317385	200765911234317	679674774174441	625936740968465	132205306605418	926974036013436	13802768185756	206783307985389	1414	1208	4457	0.4281	nonDE
105035054	XM_010910484	LOC105035054	carbamoyl-phosphate synthase large chain, chloroplastic	protein_coding	XP_010908786.1	.	214	205	383	431	262	363	473	380	147980969094175	146466234174502	110772527025026	114799461854216	18927754279027	224327716715251	128013908860051	110672756386546	-0.4638	1195	5492	0.4328	nonDE
105035062	XM_010910461	LOC105035062	ribonuclease 2	protein_coding	XP_010908763.1	.	235	118	578	644	298	240	545	373	16250246606136	843073933297133	167171072116097	171533302631358	215285144089697	14831584576215	147500169828177	108634047716268	-0.2376	0.3111	5527	0.8247	nonDE
105035081	XM_010910847	LOC105035081	butyrate--CoA ligase AAE11, peroxisomal	protein_coding	XP_010909149.1	.	0	0	382	337	233	55	256	509	0	0	110483303716867	897619922154778	168326975076843	339890479871593	692844834422263	148243244738821	-2464	0.4552	2.85	0.7539	nonDE
105035082	XM_010910490	LOC105035082	uncharacterized LOC105035082	protein_coding	XP_010908792.1	.	104	125	195	132	60	28	170	116	719159849803465	893086793746964	563985450910706	351589999182287	433460021657108	173035153389175	460092272858534	33784315107472	0.4765	0.7034	3817	0.6423	nonDE
105035093	XM_010910507,XM_010910521,XM_010910544,XM_019848721,XM_029262323,XM_029262330	LOC105035093	protein FAR1-RELATED SEQUENCE 6, transcript variant X5	protein_coding	XP_010908809.1		57	70	153	130	59	70	160	161	394154917680745	5001286044983	442511661483785	346262877982555	426235687962822	432587883472937	433028021513915	468902994164051	-0.296	0.7366	3767	0.6308	nonDE
105035136	XM_010910570	LOC105035136	probable ion channel CASTOR	protein_coding	XP_010908872.2	.	151	107	176	217	108	60	206	163	104416478192619	764482295447401	509033022360432	577992650170881	780228038982794	370789614405374	557523577699165	474727876079132	0.1669	0.2703	4264	0.8482	nonDE
105035154	XM_010910602	LOC105035154	BAG-associated GRAM protein 1-like	protein_coding	XP_010908904.2	.	49	42	111	230	43	64	154	157	338834929234325	30007716269898	321037872056864	612618937969136	31064634885426	395508922032399	416789470707143	457253230333888	-0.2162	0.254	3.61	0.8622	nonDE
105035213	XM_010910676	LOC105035213	flowering time control protein FPA	protein_coding	XP_010908978.1	.	226	223	254	248	160	141	295	310	156278967361138	159326684004458	734627202724715	660563028766721	115589339108562	87135559385263	79839541466628	902856696837613	-0.06994	0.1019	4963	0.9452	nonDE
105035251	XM_010910746	LOC105035251	uncharacterized GPI-anchored protein At1g61900	protein_coding	XP_010909048.1	.	0	24	56	77	22	0	92	66	0	171472664399417	161965052569229	205094166189667	158935341274273	0	248991112370501	192221103197685	-0.3804	0.08086	1.12	0.9562	nonDE
105035255	XM_010910759,XM_010910769	LOC105035255	TBC1 domain family member 22B, transcript variant X1	protein_coding	XP_010909061.1		241	215	210	213	98	106	221	95	166651465194841	153610928524478	607368947134607	567338407771417	707984702039942	655061652116161	598119954716095	276681890966365	0.64	0.8632	4502	0.5765	nonDE
105035271	XM_010910787	LOC105035271	protein CLP1 homolog	protein_coding	XP_010909089.1	.	220	142	166	222	77	21	145	194	152129968227656	101454659769655	480110691544499	59131045317021	556273694459955	129776365041881	392431644496985	565013545762894	0.7829	0.877	4097	0.5675	nonDE
105035295	XM_010910820,XM_029262293,XR_003799578	LOC105035295	starch synthase 3, chloroplastic/amyloplastic, transcript variant X2	protein_coding	XP_010909122.1		685	494	284	281	228	176	193	189	473677401072475	3529479008888	821394195172516	748460528562292	164714808229701	10876495355891	52234005095116	55045134097519	0.8928	0.7472	5286	0.6276	nonDE
105035312	XM_010910843	LOC105035312	probable membrane-associated 30 kDa protein, chloroplastic	protein_coding	XP_010909145.1	.	665	315	173	162	155	184	119	97	45984740396087	225057872024235	500356323115652	431496817178261	111977172261419	113708815084315	322064591000974	282506772881447	0.8672	0.5286	4743	0.724	nonDE
105035317	XM_010910888	LOC105035317	casein kinase 1-like protein 2	protein_coding	XP_010909190.1	.	439	454	1177	1320	647	592	2956	2567	303568436599732	324369123488897	340415833703539	351589999182287	467414390020248	365845752879969	800019269746957	747623593800695	-0.9176	1759	7094	0.2514	nonDE
105035360	XM_010910910	LOC105035360	selenoprotein F	protein_coding	XP_010909212.1	.	102	61	155	196	40	39	153	88	70532985269186	435826355348518	448296127646972	522057877573699	288973347771405	241013249363493	414083045572681	256294804263581	0.4924	0.9249	3633	0.55	nonDE
105035371	XM_010910921	LOC105035371	fructokinase-1	protein_coding	XP_010909223.1	.	246	223	159	242	176	207	460	470	170108964472743	159326684004458	459865059973345	644581665167526	127148273019418	127922416969854	12449555618525	136884725004412	-0.754	1.26	5.13	0.4135	nonDE
105035389	XM_010910940	LOC105035389	proteasome subunit beta type-4	protein_coding	XP_010909242.1	.	553	442	878	725	138	231	513	544	382399420135881	315795490268926	253938064563898	193108143490271	996958049811347	142754001546069	138839609397899	158436788090213	0.8136	2322	5927	0.1567	nonDE
105035405	XM_010910984	LOC105035405	probable magnesium transporter NIPA9	protein_coding	XP_010909286.1	.	10	14	99	80	19	0	157	143	0.691499855580255	10002572089966	286331075077743	213084847989265	137262340191417	0	424908746110529	416479056928318	-0.1165	0.03277	1892	0.9833	nonDE
105035417	XM_010910967	LOC105035417	probable polygalacturonase	protein_coding	XP_010909269.1	.	49	82	177	180	33	12	120	97	338834929234325	585864936698008	511925255442026	479440907975846	238403011911409	0.741579228810749	324771016135436	282506772881447	0.578	0.739	3295	0.6308	nonDE
105035453	XM_010911020	LOC105035453	SWI/SNF-related matrix-associated actin-dependent regulator of chromatin subfamily A-like protein 1	protein_coding	XP_010909322.1	.	37	35	81	84	53	0	100	85	255854946564694	25006430224915	234270879609063	223739090388728	382889685797112	0	270642513446197	247557481390959	0.497	0.212	2263	0.883	nonDE
105035462	XM_010911031,XM_019848558	LOC105035462	aspartic proteinase, transcript variant X2	protein_coding	XP_010909333.1		2328	2281	3053	3032	998	1532	3347	2096	160981166379083	162970478122946	882998759810455	807591573879314	720988502689656	946749482115056	90584049250442	610447624700528	0.4208	0.9834	8242	0.5174	nonDE
105035492	XM_010911065	LOC105035492	dnaJ protein ERDJ2	protein_coding	XP_010909367.1	.	270	294	865	655	427	304	929	805	186704961006669	210054013889286	250178161557826	174463219291211	308479048745975	18786673796539	251426894991517	234451497082025	-0.4495	1101	6133	0.4693	nonDE
105035527	XM_010911111	CHI2	chitinase 10	protein_coding	XP_010909413.1	.	0	0	237	122	0	26	404	651	0	0	685459240337628	324954393183629	0	160675499575662	109339575432263	189599906335899	-3295	0.4347	1467	0.7632	nonDE
105035637	XM_010911258,XM_010911264,XM_019848752,XM_029262245	LOC105035637	protein phosphatase 2C 32, transcript variant X2	protein_coding	XP_010909560.1		153	167	264	165	134	175	217	162	105799477903779	119316395644594	763549533540649	439487498977859	968060715034207	108146970868234	587294254178247	471815435121592	-0.05388	0.06076	4609	0.9669	nonDE
105035667	XM_010911341	LOC105035667	26S proteasome non-ATPase regulatory subunit 12 homolog A	protein_coding	XP_010909643.1	.	238	272	582	572	157	198	495	418	164576965628101	194335686319339	168327965348734	152355666312324	113422039000276	122360572753774	133968044155867	121740032025201	0.2403	0.7493	5512	0.6261	nonDE
105035699	XM_010911354,XM_019848791	LOC105035699	rhomboid-like protein 14, mitochondrial, transcript variant X2	protein_coding	XP_010909656.1		59	20	116	80	10	60	150	97	40798491479235	142893886999514	33549903746483	213084847989265	0.722433369428513	370789614405374	405963770169295	282506772881447	-0.3836	0.4008	2971	0.7782	nonDE
105035709	XM_019847349	LOC105035709	mediator of RNA polymerase II transcription subunit 19a	protein_coding	XP_019702908.1	.	57	36	122	104	27	50	104	78	394154917680745	257208996599126	352852435954391	277010302386044	195057009745698	308991345337812	281468213984045	227170394688174	0.1419	0.2194	3161	0.8811	nonDE
105035751	XM_010911439,XM_029262223	LOC105035751	transmembrane protein 64, transcript variant X1	protein_coding	XP_010909741.1		26	57	142	139	46	76	236	205	179789962450866	407247577948615	410697097586258	370234923381348	332319349937116	469666844913474	638716331733024	597050396295841	-0.7035	1051	3673	0.4885	nonDE
105035807	XM_010911540	LOC105035807	glycylpeptide N-tetradecanoyltransferase 1	protein_coding	XP_010909842.1	.	52	43	97	123	46	68	150	95	359579924901733	307221857048955	280546608914557	327617953783495	332319349937116	420228229659424	405963770169295	276681890966365	-0.3194	0.6384	3416	0.6709	nonDE
105035892	XM_010911637,XM_010911699	LOC105035892	THO complex subunit 6, transcript variant X2	protein_coding	XP_010909939.2		142	145	502	446	91	126	327	290	981929794923962	103598068074648	145190100695987	118794802754015	657414366179946	778658190251286	885001018969063	8446078776868	0.343	0.6523	4915	0.6633	nonDE
105035928	XM_019847650	LOC105035928	calreticulin-3	protein_coding	XP_019703209.1	.	76	159	138	164	161	181	166	150	525539890240994	113600640164614	399128165259885	436823938377993	116311772477991	111854867012288	449266572320686	436866143631103	-0.4711	0.5642	4334	0.709	nonDE
105036004	XM_019848734,XM_019848735,XM_019848736,XM_019848737,XM_019848739,XM_029262236,XM_029262237	LOC105036004	nuclear pore complex protein NUP98A, transcript variant X3	protein_coding	XP_019704293.1		40	39	104	123	25	28	169	76	276599942232102	278643079649053	30079224048571	327617953783495	180608342357128	173035153389175	457385847724072	221345512773092	-0.1091	0.1099	3079	0.9405	nonDE
105036013	XM_029263033	LOC105036013	protein COP1 SUPPRESSOR 2	protein_coding	XP_029118866.1	.	91	94	146	131	72	11	174	169	629264868578032	671601268897717	422266029912631	348926438582421	520152025988529	0.679780959743186	470917973396382	492202521824376	0.1279	0.09842	3629	0.9462	nonDE
105036057	XM_010911800,XM_029262420,XM_029262421	LOC105036057	protein YLS7, transcript variant X1	protein_coding	XP_010910102.1		153	126	273	293	81	94	213	208	105799477903779	900231488096939	789579631274989	780423255760682	585171029237095	580903729235086	576468553640399	605787719168463	0.3528	1214	4507	0.4281	nonDE
105036063	XM_010911812,XM_010911817	LOC105036063	D-3-phosphoglycerate dehydrogenase, transcript variant X2	protein_coding	XP_010910114.1		25	62	285	344	43	49	187	213	172874963895064	442971049698494	824286428254109	916264846353838	31064634885426	302811518431056	506101500144388	620349923956167	0.04889	0.02713	3844	0.9874	nonDE
105036107	XM_010911851,XM_019848405,XM_029262418	LOC105036107	shaggy-related protein kinase kappa, transcript variant X1	protein_coding	XP_010910153.1		121	71	368	449	131	107	271	340	836714825252109	507273298848275	106434177402636	119593870933975	946387713951352	661241479022917	733441211439193	990229925563834	-0.07787	0.07796	4734	0.9585	nonDE
105036117	XM_010911888,XM_029263545,XR_003800355	LOC105036117	uncharacterized LOC105036117, transcript variant X3	protein_coding	XP_010910190.1		156	175	892	868	266	201	843	508	10787397747052	125032151124575	257987190878128	231197060068352	192167276267984	1242145208258	228151638835144	147952000643067	-0.1683	0.1585	5738	0.9117	nonDE
105036143	XM_010911893,XM_010911908,XM_029262412,XM_029262413,XM_029262414,XM_029262415,XM_029262416,XR_003799715,XR_003799716,XR_003799717,XR_003799718,XR_003799719	LOC105036143	regulator of nonsense transcripts UPF3, transcript variant X7	protein_coding	XP_010910195.1		116	84	121	94	60	120	120	133	802139832473096	600154325397959	349960202872797	250374696387386	433460021657108	741579228810749	324771016135436	387354647352912	-0.2268	0.2785	3841	0.841	nonDE
105036216	XM_010911984,XM_029262410,XM_029262411,XR_830460,XR_830461,XR_830463	LOC105036216	mitotic spindle checkpoint protein MAD1, transcript variant X1	protein_coding	XP_010910286.1		236	254	479	525	207	184	531	480	16319396591694	181475236489383	138537964608322	139836931492955	149543707471702	113708815084315	14371117463993	139797165961953	-0.03725	0.08281	5522	0.9552	nonDE
105036282	XM_010912047,XM_010912053	LOC105036282	splicing factor 3B subunit 4, transcript variant X2	protein_coding	XP_010910349.1		61	41	75	70	48	20	143	98	421814911903956	292932468349004	216917481119502	186449241990607	346768017325686	123596538135125	387018794228061	285419213838987	-0.5713	0.8677	3076	0.5729	nonDE
105036316	XM_010912089,XM_019848632	LOC105036316	probable serine/threonine-protein kinase At1g54610, transcript variant X1	protein_coding	XP_010910391.1		63	72	130	97	44	28	107	122	435644909015561	514417993198251	375990300607138	258365378186984	317870682548546	173035153389175	28958748938743	355317796819964	0.06856	0.08883	3371	0.9519	nonDE
105036346	XM_010912123	LOC105036346	protein ABHD11	protein_coding	XP_010910425.1	.	20	21	67	102	29	0	93	118	138299971116051	15003858134949	193779616466756	271683181186313	209505677134269	0	251697537504963	343668032989801	0.382	0.1351	2003	0.9255	nonDE
105036365	XM_010912154,XM_019848472,XM_019848473,XM_019848474,XM_019848475	LOC105036365	protein WVD2-like 7, transcript variant X2	protein_coding	XP_010910456.1		52	105	257	320	63	20	223	159	359579924901733	750192906747449	743303901969495	852339391957059	455133022739963	123596538135125	603532804985019	463078112248969	0.4992	0.4303	3925	0.7661	nonDE
105036407	XM_010912175,XM_010912183,XM_029262405,XM_029262406,XM_029262407	LOC105036407	non-lysosomal glucosylceramidase, transcript variant X5	protein_coding	XP_010910477.1		68	69	800	956	93	154	1165	1076	470219901794573	492983910148324	231378646527469	254636393347171	671863033568517	951693343640461	315298528164819	313378647031378	-0.7019	0.3716	5376	0.7908	nonDE
105036427	XM_010912196,XM_019848552,XM_029262402,XM_029262403,XM_029262404,XR_003799712,XR_003799713,XR_003799714	LOC105036427	phospholipase SGR2, transcript variant X1	protein_coding	XP_010910498.1		242	177	344	367	130	138	440	252	167342965050422	12646108999457	994928180068118	977526740150752	939163380257066	852816113132361	119082705916327	733935121300253	0.1452	0.3015	5052	0.8285	nonDE
105036505	XM_010912272	LOC105036505	uncharacterized LOC105036505	protein_coding	XP_010910574.1	.	36	28	134	114	9	0	103	145	248939948008892	20005144179932	387559232933511	303645908384702	0.650190032485661	0	278761788849583	4223039388434	1031	0.3941	2153	0.7793	nonDE
105036581	XM_010912340	LOC105036581	3-phosphoinositide-dependent protein kinase 2	protein_coding	XP_010910642.1	.	118	99	206	182	80	98	112	123	815969829584701	707324740647595	595800014808233	484768029175577	57794669554281	605623036862111	30311961505974	358230237777505	0.3949	0.8431	4076	0.5852	nonDE
105036598	XM_010934030	LOC105036598	replication factor C subunit 3	protein_coding	XP_010932332.1	.	58	20	75	78	40	20	92	54	401069916236548	142893886999514	216917481119502	207757726789533	288973347771405	123596538135125	248991112370501	157271811707197	-0.01318	0.01291	2741	0.995	nonDE
105036626	XM_010912379	LOC105036626	transportin-1	protein_coding	XP_010910681.1	.	638	432	948	1038	495	490	1190	862	441176907860203	308650795918951	274183696135051	276477590266071	357604517867114	302811518431056	322064591000974	251052410540007	-0.153	0.4058	6627	0.7759	nonDE
105036650	XM_010912404	LOC105036650	probable magnesium transporter NIPA6	protein_coding	XP_010910706.2	.	175	149	235	274	116	186	398	299	121012474726545	106455945814638	679674774174441	729815604363232	838022708537075	114944780465666	107715720351586	870819846304666	-0.375	1075	4887	0.4801	nonDE
105036676	XM_019848640	LOC105036676	uncharacterized LOC105036676	protein_coding	XP_019704199.1	.	404	386	972	757	265	316	493	476	279365941654423	275785201909062	281125055530875	201631537409842	191444842898556	195282530253497	133426759128975	138632189578937	0.4695	1562	6014	0.3073	nonDE
105036687	XM_010912436	LOC105036687	cystathionine beta-lyase, chloroplastic	protein_coding	XP_010910738.1	.	140	116	188	173	83	82	183	133	968099797812357	828784544597182	543739819339553	460795983776785	599619696625665	506745806354012	49527579960654	387354647352912	0.216	0.4595	4187	0.7534	nonDE
105036736	XM_010912476	LOC105036736	uncharacterized LOC105036736	protein_coding	XP_010910778.1	.	163	126	211	176	153	94	206	145	112714476459582	900231488096939	6102611802162	468786665576382	110532305522562	580903729235086	557523577699165	4223039388434	0.03441	0.04073	4424	0.977	nonDE
105036768	XM_029263558	LOC105036768	vesicle transport v-SNARE 13	protein_coding	XP_029119391.1	.	218	203	791	831	194	302	469	576	150746968516496	145037295304507	228775636754035	221341885848849	140152073669131	186630772584038	126931338806266	167756599154344	0.06802	0.08492	5728	0.9545	nonDE
105036774	XM_010912529	LOC105036774	ubiquinone biosynthesis monooxygenase COQ6, mitochondrial	protein_coding	XP_010910831.1	.	73	41	64	116	39	0	101	47	504794894573586	292932468349004	185102917221975	308973029584434	28174901407712	0	273348938580659	136884725004412	1.08	0.4502	2.27	0.7565	nonDE
105036806	XM_010912543	LOC105036806	transmembrane 9 superfamily member 1	protein_coding	XP_010910845.1	.	532	430	1121	1157	546	332	1181	1168	367877923168696	307221857048955	324219328446616	308173961404474	394448619707968	205170253304307	319628808379958	340173103840752	-0.1224	0.2066	6644	0.8861	nonDE
105036827	XM_010912560	LOC105036827	FT-interacting protein 3	protein_coding	XP_010910862.1	.	186	197	122	148	90	39	201	134	128618973137927	140750478694521	352852435954391	39420696878014	650190032485661	241013249363493	543991452026855	390267088310452	0.3872	0.3554	4127	0.8017	nonDE
105036846	XM_010912576,XM_010912581	LOC105036846	patellin-3, transcript variant X1	protein_coding	XP_010910878.1		210	190	1122	1354	117	197	2040	1565	145214969671854	135749192649538	324508551754776	360646105221831	84524704223136	121742590063098	552110727430241	455797009855118	-0.2753	0.1448	6138	0.9211	nonDE
105036876	XM_010912601	LOC105036876	1-phosphatidylinositol-3-phosphate 5-kinase FAB1A	protein_coding	XP_010910903.1	.	280	299	621	535	297	199	585	542	193619959562471	213626361064274	179607674366948	142500492092821	214562710720268	122978555444449	158325870366025	157854299898705	-0.04288	0.08139	5751	0.9561	nonDE
105036886	XM_010912612,XM_029262461,XM_029262462	LOC105036886	serine hydroxymethyltransferase 7, transcript variant X3	protein_coding	XP_010910914.2		47	74	100	125	81	0	82	103	32500493212272	528707381898202	289223308159337	332945074983226	585171029237095	0	221926861025881	299981418626691	0.9025	0.4383	2624	0.7621	nonDE
105036922	XM_010912646,XM_029262460	LOC105036922	potassium channel AKT2, transcript variant X1	protein_coding	XP_010910948.1		542	449	519	457	533	1299	413	207	374792921724498	320796776313909	150106896934696	121724719413868	385056985905397	802759515187635	111775358053279	602875278210922	-0.1536	0.07629	6089	0.9586	nonDE
105036937	XM_010912656	LOC105036937	UDP-galactose transporter 1	protein_coding	XP_010910958.1	.	93	106	307	296	152	128	243	328	643094865689637	757337601097425	887915556049163	78841393756028	109809872153134	791017844064798	657661307674258	955280634073346	-0.3196	0.6132	4684	0.6853	nonDE
105036968	XM_010912687	LOC105036968	ubiquitin-like domain-containing CTD phosphatase	protein_coding	XP_010910989.2	.	299	305	418	389	177	214	531	353	206758456818496	217913177674259	120895342810603	10361250733478	127870706388847	132248295804583	14371117463993	102809165801186	0.0487	0.08639	5463	0.9534	nonDE
105036994	XM_029262459	LOC105036994	ABC transporter D family member 1-like	protein_coding	XP_029118292.1	.	266	342	96	158	301	156	234	268	183938961584348	244348546769169	277654375832963	420842574778798	217452444197982	964052997453973	6333034814641	780534176620905	-0.5431	0.3774	4877	0.7881	nonDE
105037047	XM_010912758	LOC105037047	proteinaceous RNase P 1, chloroplastic/mitochondrial	protein_coding	XP_010911060.1	.	111	70	53	64	38	44	69	57	767564839694083	5001286044983	153288353324448	170467878391412	274524680382835	271912383897274	186743334277876	166009134579819	0.1134	0.0928	3071	0.9492	nonDE
105037081	XM_010912787,XM_010912794	LOC105037081	probable methyltransferase PMT26, transcript variant X1	protein_coding	XP_010911089.1		0	215	3551	2167	409	237	3527	5226	0	153610928524478	10270319672738	577193581990921	295475248096262	146461897690123	954556144924736	152204164441076	-2257	0.4724	5938	0.7498	nonDE
105037099	XM_010912803,XM_010912810,XM_010912815,XM_019848381,XM_029262456,XM_029262457,XR_003799734	LOC105037099	uncharacterized LOC105037099, transcript variant X6	protein_coding	XP_010911105.1		85	63	119	166	79	55	160	127	587774877243217	45011574404847	344175736709611	442151059577724	570722361848525	339890479871593	433028021513915	369880001607667	-0.09962	0.1682	3785	0.9085	nonDE
105037126	XM_010912853,XM_029263572	LOC105037126	IAA-amino acid hydrolase ILR1-like 1, transcript variant X2	protein_coding	XP_010911155.1		0	21	87	97	27	52	663	523	0	15003858134949	251624278098623	258365378186984	195057009745698	321350999151324	179435986414828	152320662079378	-2759	0.4855	2819	0.7421	nonDE
105037157	XM_010912854	LOC105037157	PHD finger protein EHD3	protein_coding	XP_010911156.1	.	45	35	86	93	41	0	113	85	311174935011115	25006430224915	248732045017029	24771113578752	29619768146569	0	305826040194202	247557481390959	0.5944	0.2587	2303	0.8604	nonDE
105037169	XM_010912864	LOC105037169	BTB/POZ domain-containing protein At4g08455	protein_coding	XP_010911166.1	.	0	35	85	72	37	0	59	66	0	25006430224915	245839811935436	191776363190338	26730034668855	0	159679082933256	192221103197685	0.06485	0.01309	1262	0.995	nonDE
105037223	XM_010912944	LOC105037223	vacuolar-processing enzyme	protein_coding	XP_010911246.1	.	1187	1142	2752	2550	345	756	2014	1682	820810328573763	815924094767226	795942544054494	679207952965781	249239512452837	467194914150772	54507402208064	489872569058344	0.685	1331	7496	0.3837	nonDE
105037230	XM_010912923	LOC105037230	farnesylcysteine lyase	protein_coding	XP_010911225.1	.	85	61	72	62	14	0	73	65	587774877243217	435826355348518	208240781874722	16514075719168	101140671719992	0	197569034815724	189308662240145	1157	0.4279	2096	0.7667	nonDE
105037239	gene-LOC105037239	LOC105037239	.	pseudogene	.	.	32	28	210	108	186	64	66	56	221279953785682	20005144179932	607368947134607	287664544785507	134372606713703	395508922032399	17862405887449	163096693622279	0.371	0.2523	3367	0.8622	nonDE
105037249	XM_010912939	LOC105037249	ubinuclein-1	protein_coding	XP_010911241.1	.	113	123	211	245	96	157	214	198	781394836805688	878797405047012	6102611802162	652572346967123	693536034651372	970232824360729	579174978774861	576663309593056	-0.1155	0.2387	4485	0.8673	nonDE
105037320	XM_010913027,XM_010913161,XM_029263577,XR_002165698,XR_003800363,XR_003800364,XR_003800368,XR_830582,XR_830597	LOC105037320	pentatricopeptide repeat-containing protein At1g10910, chloroplastic, transcript variant X1	protein_coding	XP_010911329.1		402	322	434	479	182	249	380	208	277982941943263	230059158069218	125522915741152	127584552733572	131482873235989	15387768997823	102844155109555	605787719168463	0.5646	1026	5447	0.499	nonDE
105037336	XM_010913015	LOC105037336	uncharacterized LOC105037336	protein_coding	XP_010911317.1	.	322	306	112	149	152	136	165	76	222662953496842	218627647109257	323930105138457	396870529380006	109809872153134	840456459318848	446560147186225	221345512773092	0.4476	0.2675	4472	0.8506	nonDE
105037408	XM_010913080	LOC105037408	probable magnesium transporter NIPA4	protein_coding	XP_010911382.1	.	203	321	461	453	228	226	694	615	140374470682792	22934468863422	133331945061454	120659295173921	164714808229701	139664088092691	18782590433166	179115118888752	-0.384	0.9929	5651	0.5125	nonDE
105037449	XM_019848493,XM_029262451,XM_029262452,XM_029262453	LOC105037449	valine--tRNA ligase, mitochondrial 1, transcript variant X4	protein_coding	XP_019704052.1		597	454	1377	1299	321	406	1662	1509	412825413781412	324369123488897	398260495335407	345996521922569	231901111586553	250900972414303	449807857347579	43948734049289	-0.03751	0.0439	6781	0.9766	nonDE
105037566	XM_010913214,XM_010913221,XM_019848464,XM_019848465,XM_029262441,XR_002164011,XR_002164012,XR_002164013,XR_002164014	LOC105037566	F-box protein SKP2A, transcript variant X3	protein_coding	XP_010911516.1		38	40	178	121	48	95	171	97	262769945120497	285787773999028	514817488523619	322290832583763	346768017325686	587083556141843	462798697992996	282506772881447	-0.2834	0.3557	3548	0.8017	nonDE
105037595	XM_010913239	LOC105037595	ras-related protein RABC1	protein_coding	XP_010911541.1	.	140	109	304	257	48	154	218	171	968099797812357	778771684147352	879238856804383	684535074165513	346768017325686	951693343640461	590000679312709	498027403739458	0.3371	0.5748	4425	0.7051	nonDE
105037604	XM_010913274,XM_010913331,XM_010913383,XM_010913441	LOC105037604	PITH domain-containing protein 1, transcript variant X1	protein_coding	XP_010911576.1		98	83	717	751	145	120	540	321	67766985846865	593009631047984	207373111950244	200033401049922	104752838567134	741579228810749	146146957260946	934893547370561	0.03556	0.02221	5.09	0.9899	nonDE
105037634	XM_010913278,XM_029262440	LOC105037634	GDP-mannose transporter GONST1, transcript variant X1	protein_coding	XP_010911580.1		17	6	62	99	21	71	105	65	117554975448643	0.428681660998542	179318451058789	263692499386715	151711007579988	438767710379693	284174639118506	189308662240145	-0.6561	0.5125	2493	0.7315	nonDE
105037673	XM_010913315	LOC105037673	short-chain dehydrogenase reductase 3a-like	protein_coding	XP_010911617.1	.	0	0	45	56	9	0	53	67	0	0	130150488671701	149159393592485	0.650190032485661	0	143440532126484	195133544155226	-1653	0.3332	0.07028	0.8128	nonDE
105037681	gene-LOC105037681	LOC105037681	.	pseudogene	.	.	320	220	237	310	159	171	354	238	221279953785682	157183275699466	685459240337628	825703785958401	114866905739134	105675040105532	958074497599536	693160947894684	0.07515	0.0902	5069	0.9514	nonDE
105037721	XM_010913355,XM_010913361	LOC105037721	NAC domain-containing protein 82, transcript variant X1	protein_coding	XP_010911657.1		43	51	157	162	29	17	358	184	29734493789951	364379411848761	454080593810158	431496817178261	209505677134269	105057057414856	968900198137384	535889136187487	-0.4469	0.3146	3496	0.823	nonDE
105037749	XM_010913379,XM_010913386	LOC105037749	lysine--tRNA ligase, transcript variant X1	protein_coding	XP_010911681.1		1227	739	983	852	532	771	1925	941	848470322796973	527992912463205	284306511920628	226935363108567	384334552535969	476464654510906	520986838383929	274060694104579	-0.1392	0.1579	7009	0.9118	nonDE
105037830	XM_010913449	LOC105037830	chromatin assembly factor 1 subunit FAS2 homolog	protein_coding	XP_010911751.1	.	49	20	65	49	23	0	58	74	338834929234325	142893886999514	187995150303569	130514469393425	166159674968558	0	156972657798794	215520630858011	0.6372	0.2515	1808	0.8622	nonDE
105037849	XM_010913477	LOC105037849	protein trichome berefringence-like 7	protein_coding	XP_010911779.2	.	24	16	65	114	23	0	55	64	165959965339261	114315109599611	187995150303569	303645908384702	166159674968558	0	148853382395408	186396221282604	1142	0.4569	1758	0.7539	nonDE
105037879	XM_010913501,XM_010913517,XM_029263598,XM_029263600,XM_029263603,XR_002166052	LOC105037879	zinc protease PQQL-like, transcript variant X5	protein_coding	XP_010911803.1		604	588	694	720	472	701	884	687	417665912770474	420108027778572	20072097586258	191776363190338	340988550370258	433205866163612	239247981886438	200084693783045	-0.2335	0.3675	6512	0.7944	nonDE
105037882	XM_010913497,XM_010913498,XM_010913499	LOC105037882	putative UDP-glucuronate:xylan alpha-glucuronosyltransferase 3, transcript variant X2	protein_coding	XP_010911799.1		101	239	961	1026	266	150	1636	1643	698414854136058	170758194964419	277943599141122	273281317546232	192167276267984	926974036013436	442771151997978	478514049323935	-0.6828	0.4493	6038	0.7565	nonDE
105037895	XM_010913520	LOC105037895	extradiol ring-cleavage dioxygenase	protein_coding	XP_010911822.1	.	140	134	941	1131	111	121	1451	3020	968099797812357	957389042896745	272159132977936	301248703844823	801901040065649	747759055717505	392702287010431	879557169177288	-0.5741	0.2607	5898	0.8581	nonDE
105037898	XM_010913524,XM_010913526,XM_010913527,XM_010913528,XM_019848627	LOC105037898	transcriptional activator SPT7, transcript variant X2	protein_coding	XP_010911826.2		164	167	362	312	154	204	333	281	113405976315162	119316395644594	10469883755368	831030907158133	111254738891991	126068468897827	901239569775835	818395909068933	-0.1411	0.361	5022	0.7996	nonDE
105037902	XM_010913531	LOC105037902	receptor protein-tyrosine kinase CEPR2	protein_coding	XP_010911833.1	.	29	17	124	216	19	0	122	73	200534958118274	121459803949587	358636902117577	575329089571015	137262340191417	0	33018386640436	21260818990047	1366	0.4434	2165	0.7589	nonDE
105037903	XM_010913533	LOC105037903	protein KTI12 homolog	protein_coding	XP_010911835.1	.	105	123	229	205	47	29	157	114	726074848359268	878797405047012	662321375684881	546029922972491	339543683631401	179214980295931	424908746110529	332018269159638	0.7777	1741	3869	0.2529	nonDE
105037905	XM_010913535,XM_010913536,XM_010913537,XM_029262422,XM_029262423,XM_029262424	LOC105037905	prohibitin-1, mitochondrial, transcript variant X1	protein_coding	XP_010911837.1		113	60	205	159	32	46	201	171	781394836805688	428681660998542	59290778172664	423506135378664	231178678217124	284272037710787	543991452026855	498027403739458	0.1213	0.1368	3819	0.9245	nonDE
105037913	XM_010913579	LOC105037913	acyl transferase 5	protein_coding	XP_010911881.1	.	0	32	246	345	107	184	504	508	0	228630219199223	711489338071968	918928406953704	773003705288509	113708815084315	136403826776883	147952000643067	-1663	0.8108	3727	0.6006	nonDE
105037923	XM_029262429	LOC105037923	TOM1-like protein 5	protein_coding	XP_029118262.1	.	27	98	172	184	79	103	193	130	186704961006669	700180046297619	497464090034059	490095150375309	570722361848525	636522171395893	52234005095116	37861732448029	-0.4042	0.475	3895	0.7481	nonDE
105037924	XM_010913555,XR_830633	LOC105037924	uncharacterized LOC105037924, transcript variant X1	protein_coding	XP_010911857.1	.	254	241	119	132	39	46	65	49	175640963317385	172187133834415	344175736709611	351589999182287	28174901407712	284272037710787	175917633740028	142709606919494	1751	1.48	3691	0.3304	nonDE
105037932	XM_010913566,XM_019848676,XM_029262469	LOC105037932	AUGMIN subunit 7, transcript variant X1	protein_coding	XP_010911868.1		52	73	146	119	65	101	115	83	359579924901733	521562687548227	422266029912631	316963711384031	469581690128533	62416251758238	311238890463126	241732599475877	-0.02675	0.03062	3639	0.9859	nonDE
105037935	XM_010913569	LOC105037935	photosystem II 22 kDa protein, chloroplastic	protein_coding	XP_010911871.1	.	6515	4282	0	12	1340	2247	0	0	450512155910536	30593581206596	0	319627271983897	968060715034207	138860710594813	0	0	4782	0.3124	3009	0.8247	nonDE
105037936	XM_010913570	LOC105037936	serine/threonine-protein kinase SAPK7	protein_coding	XP_010911872.1	.	116	188	438	466	77	95	339	389	802139832473096	134320253779543	126679808973789	124121923953747	556273694459955	587083556141843	917478120582607	113293953248333	0.3204	0.4257	4887	0.767	nonDE
105037937	XM_010913572	LOC105037937	probable ion channel POLLUX	protein_coding	XP_010911874.2	.	29	39	90	56	42	0	56	42	200534958118274	278643079649053	260300977343403	149159393592485	303422015159975	0	15155980752987	122322520216709	1106	0.497	1914	0.7368	nonDE
105037940	XM_010913575,XM_010913576	LOC105037940	subtilisin-like protease SBT3.9, transcript variant X1	protein_coding	XP_010911877.1		379	362	926	997	427	392	599	704	262078445264917	258637935469121	267820783355546	265556991806621	308479048745975	242249214744845	162114865554272	205035843410864	0.04015	0.06739	6263	0.9618	nonDE
105037942	XM_010913578,XM_019848425,XM_029262467,XR_003799740	LOC105037942	DDB1- and CUL4-associated factor homolog 1, transcript variant X4	protein_coding	XP_010911880.1		256	249	460	405	192	161	630	368	177023963028545	177902889314395	133042721753295	107874204294565	138707206930274	994952131987754	170504783471104	107177827237497	-0.03438	0.05703	5424	0.9697	nonDE
105037943	XM_010913581	LOC105037943	embryogenesis-associated protein EMB8	protein_coding	XP_010911883.1	.	47	54	53	65	35	47	101	70	32500493212272	385813494898688	153288353324448	173131438991278	252851679299979	290451864617543	273348938580659	203870867027848	-0.5195	0.9653	2976	0.5301	nonDE
105037944	XM_010913582,XM_010913583	LOC105037944	zinc finger protein STOP1 homolog, transcript variant X2	protein_coding	XP_010911884.1		218	134	352	305	88	176	730	394	150746968516496	957389042896745	101806604472086	812385982959072	635741365097091	10876495355891	197569034815724	114750173727103	-0.3927	0.5369	5099	0.7224	nonDE
105037948	XM_010913587,XM_010913588	LOC105037948	bifunctional aspartate aminotransferase and glutamate/aspartate-prephenate aminotransferase, transcript variant X1	protein_coding	XP_010911889.1		104	77	110	214	20	9	130	151	719159849803465	550141464948129	31814563897527	570001968371283	144486673885703	0.556184421608061	351835267480056	439778584588644	0.4398	0.4105	3.32	0.7743	nonDE
105037949	XM_019848597	LOC105037949	uncharacterized LOC105037949	protein_coding	XP_019704156.1	.	64	74	148	157	38	20	227	154	442559907571363	528707381898202	428050496075818	418179014178932	274524680382835	123596538135125	614358505522866	448515907461266	-0.07755	0.06827	3.58	0.9612	nonDE
105037950	XM_010913590,XM_010913591,XM_010913592,XR_830635	LOC105037950	probable alkaline/neutral invertase D, transcript variant X4	protein_coding	XP_010911892.1		155	183	413	438	132	109	644	566	10718247761494	130747906604555	119449226269806	116663954274122	953612047645637	67360113283643	174293778659351	164844158196803	-0.2527	0.3109	5217	0.8247	nonDE
105037951	XM_010913593	LOC105037951	protein NRT1/ PTR FAMILY 5.10	protein_coding	XP_010911895.1	.	44	62	97	151	27	0	153	99	304259936455312	442971049698494	280546608914557	402197650579737	195057009745698	0	414083045572681	288331654796528	0.7899	0.3311	2518	0.8141	nonDE
105037954	XM_010913599,XM_010913606	LOC105037954	RNA cytidine acetyltransferase 1, transcript variant X1	protein_coding	XP_010911901.1		236	132	287	288	107	96	396	252	16319396591694	943099654196793	830070894417296	767105452761353	773003705288509	593263383048599	107174435324694	733935121300253	0.0845	0.1226	4799	0.933	nonDE
105037971	XM_010913617	LOC105037971	ras-related protein RIC1	protein_coding	XP_010911919.1	.	267	240	649	599	188	290	571	486	184630461439928	171472664399417	187705926995409	159547279931962	13581747345256	179214980295931	154536875177778	141544630536477	0.001319	0.002591	5692	0.9995	nonDE
105037975	XM_010913618	LOC105037975	WD repeat-containing protein 36	protein_coding	XP_010911920.2	.	197	173	240	248	87	30	322	196	13622547154931	12360321225458	694135939582408	660563028766721	628517031402806	185394807202687	871468893296753	570838427677975	0.5819	0.6527	4429	0.663	nonDE
105037978	XM_010913623	LOC105037978	mitochondrial import inner membrane translocase subunit TIM44-2	protein_coding	XP_010911925.1	.	196	204	120	178	79	36	131	83	13553397169373	145751764739504	347067969791204	474113786776114	570722361848525	222473768643225	354541692614518	241732599475877	0.9645	1084	3973	0.4749	nonDE
105037979	XM_010913629,XM_010913638,XM_010913646,XM_010913653	LOC105037979	60S ribosomal protein L28-2, transcript variant X1	protein_coding	XP_010911931.1		374	311	972	970	205	264	581	506	258620945987015	222199994284245	281125055530875	258365378186984	148098840732845	163147430338365	15724330031224	147369512451559	0.5094	1.54	5968	0.3162	nonDE
105037981	XM_010913627,XM_010913628,XM_029262471	LOC105037981	TBC1 domain family member 17, transcript variant X2	protein_coding	XP_010911929.1		296	256	503	580	170	175	431	357	204683957251756	182904175359378	145479324004146	154486514792217	122813672802847	108146970868234	116646923295311	103974142184203	0.3777	1506	5455	0.3201	nonDE
105037985	XM_010913636	LOC105037985	uncharacterized LOC105037985	protein_coding	XP_010911938.1	.	49	73	355	378	80	77	203	260	338834929234325	521562687548227	102674274396564	100682590674928	57794669554281	47584667182023	549404302295779	757234648960579	0.04965	0.03755	4292	0.9792	nonDE
105037992	XM_010913644,XM_019848743	LOC105037992	glycine-rich RNA-binding protein RZ1A, transcript variant X2	protein_coding	XP_010911946.1		82	140	308	322	99	312	265	336	567029881575809	10002572089966	890807789130757	857666513156791	715209035734228	192810599490795	717202660632421	978580161733671	-0.443	0.6008	4.83	0.6924	nonDE
105037994	XM_010913647,XM_010913648	LOC105037994	PH, RCC1 and FYVE domains-containing protein 1, transcript variant X1	protein_coding	XP_010911949.1		261	201	304	268	298	269	445	340	180481462306447	143608356434512	879238856804383	713834240764037	215285144089697	166237343791743	120435918483558	990229925563834	-0.5616	1121	5335	0.4617	nonDE
105037999	XM_010913659,XM_010913660,XM_010913661,XM_019848575,XM_019848576,XM_019848577,XM_029262476,XM_029262477,XM_029262478,XM_029262479,XR_002164034,XR_830637,XR_830638,XR_830639	LOC105037999	serine/threonine-protein kinase STY46, transcript variant X14	protein_coding	XP_010911961.1		252	282	265	361	109	181	481	301	174257963606224	201480380669315	766441766622242	961545376551557	787452372677079	111854867012288	130179048967621	876644728219747	0.05154	0.06509	5158	0.9642	nonDE
105038005	NM_001319906,XM_029261651	LOC105038005	actin-3-like	protein_coding	NP_001306835.1		232	281	9729	9231	318	347	8142	7778	160427966494619	200765911234317	281385356508219	245873278973613	229733811478267	214439993664441	220357134447893	226529657677515	-0.2694	0.07403	7782	0.9588	nonDE
105038008	XM_010913670	LOC105038008	VAMP-like protein YKT61	protein_coding	XP_010911972.1	.	146	97	221	296	59	85	139	206	100958978914717	693035351947644	639183511032134	78841393756028	426235687962822	52528528707428	376193093690213	599962837253382	0.4818	1078	4262	0.4791	nonDE
105038009	XM_010913671	LOC105038009	fructose-1,6-bisphosphatase, cytosolic	protein_coding	XP_010911973.1	.	238	204	274	224	197	308	303	182	164576965628101	145751764739504	792471864356582	596637574369941	142319373777417	190338668728092	820046815741976	530064254272405	-0.1974	0.1994	5038	0.8901	nonDE
105038021	XM_010913689,XM_010913690	LOC105038021	tubby-like F-box protein 8, transcript variant X1	protein_coding	XP_010911991.1		101	117	306	287	35	26	208	206	698414854136058	835929238947158	88502332296757	764441892161487	252851679299979	160675499575662	562936427968089	599962837253382	0.6732	0.871	4051	0.571	nonDE
105038022	XM_010913693	LOC105038022	glycerol-3-phosphate acyltransferase 9	protein_coding	XP_010911995.2	.	623	444	1479	1318	636	689	1306	1101	430804410026499	317224429138921	427761272767659	351057287062314	459467622956534	425790073875505	353459122560733	32065974942523	-0.2611	0.6509	6918	0.6636	nonDE
105038023	XM_010913698,XM_010913707,XM_010913716,XM_010913724,XM_010913732,XM_010913740,XM_029263645,XR_002166109,XR_003800405	LOC105038023	NADP-specific glutamate dehydrogenase, transcript variant X1	protein_coding	XP_010912000.1		87	80	119	80	89	67	91	79	601604874354822	571575547998057	344175736709611	213084847989265	642965698791376	414048402752668	246284687236039	230082835645714	0.1022	0.1075	3571	0.9408	nonDE
105038024	XM_010913694	LOC105038024	UPF0496 protein 4	protein_coding	XP_010911996.1	.	4	14	107	77	16	6	113	206	0.276599942232102	10002572089966	30946893973049	205094166189667	115589339108562	0.370789614405374	305826040194202	599962837253382	-0.9932	0.4633	2185	0.7525	nonDE
105038026	XM_010913702	LOC105038026	sterol 3-beta-glucosyltransferase UGT80B1	protein_coding	XP_010912004.3	.	42	60	87	69	61	40	103	90	290429939343707	428681660998542	251624278098623	183785681390741	440684355351393	24719307627025	278761788849583	262119686178662	-0.3737	0.7148	3193	0.639	nonDE
105038027	XM_010913703,XM_029262482	LOC105038027	cellulose synthase A catalytic subunit 2 [UDP-forming], transcript variant X1	protein_coding	XP_010912005.1		48	98	633	870	168	119	844	1082	331919930678522	700180046297619	18307835406486	231729772188325	12136880606399	735399401903992	22842228134859	315126111605903	-0.8019	0.4945	5.32	0.7381	nonDE
105038029	XM_010913705	LOC105038029	U3 small nucleolar RNA-associated protein 18 homolog	protein_coding	XP_010912007.1	.	61	37	73	86	18	79	168	143	421814911903956	264353690949101	211133014956316	22906621158846	130038006497132	488206325633743	45467942258961	416479056928318	-0.8396	1284	3257	0.403	nonDE
105038030	XM_010913706	LOC105038030	60S ribosomal protein L3	protein_coding	XP_010912008.1	.	1893	1889	5346	4144	758	1692	4931	4046	130900922661342	134963276271041	154618780541981	110377951258439	547604494026813	104562671262316	13345382338032	117837361142096	0.2915	0.3772	8485	0.7881	nonDE
105038031	XM_010913710,XM_029262483	LOC105038031	protein FAM98B, transcript variant X2	protein_coding	XP_010912012.1		0	30	105	103	68	77	103	71	0	214340830499271	303684473567303	274346741786178	491254691211389	47584667182023	278761788849583	206783307985389	-1149	0.4844	2468	0.7426	nonDE
105038032	XM_010913712,XM_010913713	LOC105038032	polypyrimidine tract-binding protein homolog 3, transcript variant X1	protein_coding	XP_010912014.1		751	608	889	916	335	402	587	542	519316391540772	434397416478523	25711952095365	243982150947708	242015178758552	248429041651601	158867155392917	157854299898705	0.6176	1617	6367	0.2858	nonDE
105038033	XM_010913714,XM_010913715,XM_029262484	LOC105038033	protein LIKE COV 2, transcript variant X2	protein_coding	XP_010912016.1		43	43	167	154	40	0	66	132	29734493789951	307221857048955	483002924626092	410188332379335	288973347771405	0	17862405887449	384442206395371	1.29	0.5713	2.52	0.7065	nonDE
105038035	XM_019848641	LOC105038035	protein S-acyltransferase 8	protein_coding	XP_019704200.1	.	73	103	132	104	92	92	143	129	504794894573586	735903518047498	381774766770324	277010302386044	664638699874232	568544075421574	387018794228061	375704883522749	-0.3289	0.5845	3883	0.6996	nonDE
105038036	XM_010913720	LOC105038036	ribonucleoside-diphosphate reductase large subunit	protein_coding	XP_010912022.1	.	107	94	128	167	76	115	207	242	739904845470873	671601268897717	370205834443951	44481462017759	54904936076567	710680094276967	560230002833627	704810711724847	-0.4856	1222	4.2	0.4276	nonDE
105038038	XM_010913722	LOC105038038	DNA polymerase alpha catalytic subunit	protein_coding	XP_010912024.1	.	26	36	127	89	44	59	165	155	179789962450866	257208996599126	367313601362358	237056893388057	317870682548546	364609787498618	446560147186225	451428348418807	-0.6776	1234	3323	0.423	nonDE
105038039	XM_010913723	LOC105038039	nicotinate phosphoribosyltransferase 2	protein_coding	XP_010912025.1	.	55	85	152	104	59	61	175	134	38032492056914	607299019747935	439619428402192	277010302386044	426235687962822	376969441312131	473624398530844	390267088310452	-0.2814	0.5454	3713	0.7183	nonDE
105038041	XM_010913726	LOC105038041	40S ribosomal protein S10-1	protein_coding	XP_010912028.1	.	513	371	846	827	162	217	530	516	354739425912671	265068160384099	244682918702799	220276461608902	117034205847419	13410224387661	143440532126484	1502819534091	0.7381	2576	5913	0.1321	nonDE
105038049	XM_010913738,XM_010913739,XM_029262486,XM_029262487,XR_003799749	LOC105038049	uncharacterized LOC105038049, transcript variant X1	protein_coding	XP_010912040.1		145	120	141	136	102	191	134	93	100267479059137	857363321997085	407804864504665	36224424158175	736882036817083	118034693919044	362660968017904	270857009051284	-0.01874	0.01408	4173	0.9941	nonDE
105038050	XM_010913741	LOC105038050	magnesium transporter MRS2-F	protein_coding	XP_010912043.1	.	199	137	439	503	116	206	504	470	137608471260471	978823125946672	126969032281949	13397709817325	838022708537075	127304434279179	136403826776883	136884725004412	-0.172	0.2777	5.26	0.8416	nonDE
105038055	XM_010913746	LOC105038055	sister chromatid cohesion protein PDS5 homolog A	protein_coding	XP_010912048.1	.	553	736	1103	1101	613	562	1554	907	382399420135881	525849504158212	319013308899748	293258022045226	442851655459678	347306272159701	42057846589539	26415839484894	-0.1744	0.389	6855	0.783	nonDE
105038056	XM_010913748	LOC105038056	small glutamine-rich tetratricopeptide repeat-containing protein	protein_coding	XP_010912050.1	.	109	99	434	443	309	205	519	172	753734842582478	707324740647595	125522915741152	117995734574055	22323191115341	126686451588503	140463464478576	500939844696998	-0.4097	0.391	5068	0.7826	nonDE
105038066	XM_010913755	LOC105038066	V-type proton ATPase 16 kDa proteolipid subunit	protein_coding	XP_010912057.2	.	30	41	98	114	48	38	51	73	207449956674077	292932468349004	28343884199615	303645908384702	346768017325686	234833422456737	13802768185756	21260818990047	0.4943	0.7646	2961	0.6188	nonDE
105038067	XM_010913757	LOC105038067	BTB/POZ domain-containing protein At1g21780	protein_coding	XP_010912059.1	.	115	118	135	182	68	106	138	153	795224833917293	843073933297133	390451466015104	484768029175577	491254691211389	655061652116161	373486668555751	445603466503725	0.08552	0.1275	4089	0.9303	nonDE
105038077	XM_010913767,XM_010913773,XM_019855176	LOC105038077	DEAD-box ATP-dependent RNA helicase 56, transcript variant X1	protein_coding	XP_010912069.1		1000	968	2054	2111	1264	1512	2369	1981	691499855580255	691606413077648	594064674959277	562277642631672	91315577895764	934389828301543	64115211435404	57695455368881	-0.5134	1675	7767	0.2699	nonDE
105038079	XM_010913798	LOC105038079	uncharacterized LOC105038079	protein_coding	XP_010912100.1	.	36	32	148	155	29	0	72	109	248939948008892	228630219199223	428050496075818	4128518929792	209505677134269	0	194862609681262	317456064371935	1335	0.556	2339	0.7125	nonDE
105038092	XM_010913787	LOC105038092	ubiquitin carboxyl-terminal hydrolase 6	protein_coding	XP_010912089.1	.	298	288	802	716	221	187	712	609	206066956962916	2057671972793	231957093143788	190710938950392	159657774643701	115562763156342	192697469573692	177367654314228	0.1626	0.3017	5846	0.8285	nonDE
105038099	XM_010913785,XM_019848439	LOC105038099	pyruvate, phosphate dikinase 2, transcript variant X2	protein_coding	XP_010912087.1		904	587	357	137	517	1032	252	55	625115869444551	419393558343574	103252721012883	364907802181616	373498051994541	637758136777244	682019133884416	160184252664738	0.3899	0.1222	5572	0.9331	nonDE
105038105	XM_010913794,XM_019848442	LOC105038105	sugar transporter ERD6-like 16, transcript variant X1	protein_coding	XP_010912096.1		65	75	470	257	18	0	458	302	449474906127166	535852076248178	135934954834888	684535074165513	130038006497132	0	123954271158358	879557169177288	0.2442	0.0724	3327	0.9599	nonDE
105038107	XM_010913795,XM_029262491,XR_002164004,XR_003799760,XR_830653	LOC105038107	sugar transporter ERD6-like 5, transcript variant X2	protein_coding	XP_010912097.1		52	27	105	120	63	91	119	94	359579924901733	192906747449344	303684473567303	319627271983897	455133022739963	562364248514818	322064591000974	273769450008825	-0.3724	0.5927	3408	0.6964	nonDE
105038109	XM_010913800,XM_010913802,XM_029262492,XR_830654,XR_830656	LOC105038109	autophagy-related protein 18h, transcript variant X1	protein_coding	XP_010912102.1		174	129	248	198	113	99	306	179	120320974870964	921665571146866	717273804235155	52738499877343	816349707454219	611802863768868	828166091145362	521326931399783	-0.008355	0.01198	4554	0.995	nonDE
105038110	XM_010913804	LOC105038110	probable prolyl 4-hydroxylase 4	protein_coding	XP_010912106.1	.	83	64	192	312	49	76	188	155	573944880131612	457260438398445	555308751665926	831030907158133	353992351019971	469666844913474	50880792527885	451428348418807	0.2053	0.2808	4021	0.8391	nonDE
105038112	XM_010913805,XM_019848790	LOC105038112	proteasome subunit beta type-5, transcript variant X1	protein_coding	XP_010912107.1		232	147	298	246	49	136	219	240	160427966494619	105027006944643	861885458314823	655235907566989	353992351019971	840456459318848	592707104447171	698985829809765	0.4539	0.7767	4601	0.613	nonDE
105038113	XM_010913809	LOC105038113	sericin 1	protein_coding	XP_010912111.1	.	229	191	372	451	210	180	640	513	158353466927878	136463662084536	107591070635273	120126583053948	151711007579988	111236884321612	173211208605566	149408221121837	-0.397	1109	5437	0.4666	nonDE
105038114	XM_010913806	LOC105038114	transcription factor 25	protein_coding	XP_010912108.1	.	289	333	637	698	216	237	778	495	199843458262694	237918321854191	184235247297497	185916529870634	156045607796559	146461897690123	210559875461141	144165827398264	0.08011	0.1679	5837	0.9085	nonDE
105038118	XM_010913812	LOC105038118	calcium-dependent protein kinase 8	protein_coding	XP_010912114.1	.	0	0	109	229	34	65	349	355	0	0	315253405893677	60995537736927	245627345605694	401688748939155	944542371927226	103391653992694	-2937	0.5114	2231	0.7315	nonDE
105038120	XM_010913815	LOC105038120	probable E3 ubiquitin-protein ligase ARI8	protein_coding	XP_010912117.1	.	156	252	304	284	101	224	276	244	10787397747052	180046297619388	879238856804383	75645121036189	729657703122798	13842812271134	746973337111503	710635593639928	0.09495	0.1345	4.92	0.9255	nonDE
105038123	XM_010913820	LOC105038123	ferrochelatase-1, chloroplastic	protein_coding	XP_010912122.1	.	72	92	238	319	70	33	272	216	497879896017784	657311880197765	688351473419221	849675831357193	505703358599959	203934287922956	736147636573655	629087246828789	0.2368	0.2169	4144	0.8817	nonDE
105038124	XM_010913818	LOC105038124	probable glutathione peroxidase 2	protein_coding	XP_010912120.3	.	115	115	291	443	52	77	179	146	795224833917293	821639850247206	841639826743669	117995734574055	375665352102827	47584667182023	484450099068692	42521637980094	0.826	1781	4316	0.2445	nonDE
105038129	XM_010913829	LOC105038129	PTI1-like tyrosine-protein kinase 1	protein_coding	XP_010912131.1	.	229	163	580	490	181	249	496	476	158353466927878	116458517904604	167749518732415	130514469393425	130760439866561	15387768997823	134238686669314	138632189578937	-0.1662	0.3587	5475	0.801	nonDE
105038132	XM_010913839	LOC105038132	probable methyltransferase PMT19	protein_coding	XP_010912141.1	.	146	79	122	120	56	0	56	92	100958978914717	564430853648081	352852435954391	319627271983897	404562686879967	0	15155980752987	267944568093743	1758	0.7815	2712	0.6103	nonDE
105038133	XM_010913840,XM_019848706,XM_019848707,XM_019848708,XM_019848709,XM_019848710,XM_019848712,XM_019848713,XM_019848714,XM_019848715,XM_019848716,XM_019848717,XM_019848718,XM_019848719,XM_029262495,XM_029262496,XM_029262497,XM_029262498,XM_029262499	LOC105038133	uncharacterized protein At3g49140, transcript variant X6	protein_coding	XP_010912142.2		57	71	185	179	68	67	83	75	394154917680745	507273298848275	535063120094773	47677734737598	491254691211389	414048402752668	224633286160343	218433071815552	0.6553	1235	3624	0.423	nonDE
105038134	XM_010913845	LOC105038134	transcription factor bHLH13	protein_coding	XP_010912147.1	.	23	44	60	100	13	66	192	131	159044966783459	314366551398931	173533984895602	266356059986581	0.939163380257066	407868575845912	519633625816698	38152976543783	-0.9589	1139	3026	0.4538	nonDE
105038135	XM_010913841,XM_010913842,XR_003799763	LOC105038135	phospholipase A(1) LCAT3, transcript variant X2	protein_coding	XP_010912143.1		110	133	451	333	68	80	210	170	760649841138281	950244348546769	130439711979861	886965679755315	491254691211389	494386152540499	568349278237013	495114962781917	0.7103	1548	4472	0.3142	nonDE
105038136	XM_010913844,XM_029262500	LOC105038136	2,3-dimethylmalate lyase, transcript variant X1	protein_coding	XP_010912146.1		286	217	98	86	94	74	97	93	197768958695953	155039867394473	28343884199615	22906621158846	679087367262802	457307191099962	262523238042811	270857009051284	0.5689	0.3611	4011	0.7996	nonDE
105038138	XM_010913847,XM_029262502,XM_029262503	LOC105038138	formin-like protein 18, transcript variant X3	protein_coding	XP_010912149.1		15	30	143	124	21	0	108	90	103724978337038	214340830499271	413589330667851	33028151438336	151711007579988	0	292293914521892	262119686178662	1089	0.3969	2108	0.7793	nonDE
105038140	XM_010913852,XM_010913853	LOC105038140	protein ROOT INITIATION DEFECTIVE 3, transcript variant X1	protein_coding	XP_010912154.1		93	85	161	133	46	78	165	103	643094865689637	607299019747935	465649526136532	354253559782153	332319349937116	482026498726987	446560147186225	299981418626691	0.1383	0.2486	3803	0.864	nonDE
105038141	XM_010913856	LOC105038141	B2 protein	protein_coding	XP_010912158.1	.	512	486	1955	1996	912	636	1737	1183	354047926057091	347232145408819	565431567451503	531646695733216	658859232918803	393036991269697	470106045856044	344541765277063	-0.311	0.4443	7139	0.7589	nonDE
105038143	XM_010913855	LOC105038143	CBL-interacting protein kinase 6	protein_coding	XP_010912157.3	.	78	149	165	318	141	279	596	338	539369887352599	106455945814638	477218458462905	847012270757327	10186310508942	172417170698499	161302938013933	984405043648753	-1111	2105	4908	0.1897	nonDE
105038153	XM_010913862,XM_010913863,XM_010913864,XM_010913865,XM_010913866,XM_019848587	LOC105038153	probable protein phosphatase 2C 11, transcript variant X1	protein_coding	XP_010912164.1		402	351	1036	1009	271	340	875	686	277982941943263	250778771684147	299635347253073	26875326452646	195779443115127	210114114829712	236812199265422	199793449687291	0.1628	0.3869	6246	0.7845	nonDE
105038157	XM_010913879,XM_019851271	LOC105038157	auxin response factor 11, transcript variant X1	protein_coding	XP_010912181.1		32	31	47	85	9	23	100	95	221279953785682	221485524849247	135934954834888	226402650988594	0.650190032485661	142136018855393	270642513446197	276681890966365	-0.493	0.5097	2523	0.732	nonDE
105038158	XM_010913869,XM_010913870,XM_029262506	LOC105038158	nuclear nucleic acid-binding protein C1D, transcript variant X1	protein_coding	XP_010912171.1		95	71	231	160	39	37	115	113	656924862801242	507273298848275	668105841848068	42616969597853	28174901407712	228653595549981	311238890463126	329105828202098	0.6302	1.38	3662	0.3636	nonDE
105038160	XM_010913873	LOC105038160	magnesium transporter MRS2-1	protein_coding	XP_010912175.1	.	110	89	87	64	47	49	57	53	760649841138281	635877797147838	251624278098623	170467878391412	339543683631401	302811518431056	154266232664332	154359370749656	0.6727	0.7364	3211	0.6308	nonDE
105038161	XM_019847983	LOC105038161	uncharacterized LOC105038161	protein_coding	XP_019703542.1	.	53	43	137	141	17	0	76	44	366494923457535	307221857048955	396235932178291	375562044581079	122813672802847	0	205688310219109	12814740213179	1903	0.938	2183	0.5444	nonDE
105038166	XM_010913878,XR_830670,XR_830671	LOC105038166	transmembrane 9 superfamily member 8, transcript variant X2	protein_coding	XP_010912180.1	.	323	264	693	665	203	263	640	656	223354453352422	188619930839359	20043175255442	177126779891076	146653973993988	162529447647689	173211208605566	191056126814669	0.006406	0.01218	5845	0.995	nonDE
105038170	XM_010913881,XM_010913882	LOC105038170	ras-related protein RABB1c, transcript variant X1	protein_coding	XP_010912183.1		307	248	480	434	133	193	459	501	212290455663138	177188419879398	138827187916482	115598530034176	960836381339922	119270659300395	124224913671804	145913291972788	0.1265	0.2601	5442	0.8583	nonDE
105038171	XM_019848461	LOC105038171	enhancer of mRNA-decapping protein 4	protein_coding	XP_019704020.1	.	695	635	1062	1227	475	366	1297	934	480592399628277	453688091223457	307155153265215	326818885603535	343155850478543	226181664787278	351023339939717	2720219854343	0.1847	0.4333	6732	0.7634	nonDE
105038173	XM_010913888	LOC105038173	PP2A regulatory subunit TAP46	protein_coding	XP_010912190.1	.	78	88	193	155	74	148	94	103	539369887352599	628733102797862	55820098474752	4128518929792	534600693377099	914614382199923	254403962639425	299981418626691	0.1877	0.2077	3937	0.8859	nonDE
105038179	XM_010913893	LOC105038179	pyruvate kinase 1, cytosolic	protein_coding	XP_010912195.1	.	558	480	2579	2313	556	675	2216	3308	385856919413782	342945328798834	745906911742929	616081566748962	401672953402253	417138316206046	599743809796772	96343546875446	-0.3778	0.3861	7.38	0.7856	nonDE
105038180	XM_010913894	LOC105038180	protein TAB2 homolog, chloroplastic	protein_coding	XP_010912196.1	.	187	118	109	82	100	94	55	53	129310472993508	843073933297133	315253405893677	218411969188996	722433369428513	580903729235086	148853382395408	154359370749656	0.9255	0.7683	3687	0.617	nonDE
105038184	XM_019848418,XM_029262507	LOC105038184	BTB/POZ domain-containing protein At3g44820, transcript variant X2	protein_coding	XP_019703977.1		57	57	290	309	65	0	332	221	394154917680745	407247577948615	838747593662076	823040225358535	469581690128533	0	898533144641373	643649451616492	0.1241	0.04176	3315	0.977	nonDE
105038186	XM_010913900,XM_010913901	LOC105038186	uncharacterized LOC105038186, transcript variant X1	protein_coding	XP_010912202.1		33	44	87	56	56	0	55	53	228194952341484	314366551398931	251624278098623	149159393592485	404562686879967	0	148853382395408	154359370749656	0.9462	0.4228	2042	0.7686	nonDE
105038188	XM_010913904,XM_010913905	LOC105038188	phosphatidylinositol-3-phosphatase myotubularin-1, transcript variant X1	protein_coding	XP_010912206.1		150	83	186	202	111	119	219	155	103724978337038	593009631047984	537955353176366	538039241172894	801901040065649	735399401903992	592707104447171	451428348418807	-0.1456	0.2546	4344	0.8622	nonDE
105038190	XM_019848680	LOC105038190	uncharacterized LOC105038190	protein_coding	XP_019704239.1	.	31	9	173	190	154	152	385	340	214364955229879	0.643022491497814	500356323115652	506076513974504	111254738891991	939333689826948	104197367676786	990229925563834	-1466	2021	3991	0.1972	nonDE
105038192	XM_010913910,XM_010913911,XM_019848615,XR_830674,XR_830675	LOC105038192	DNA repair protein RAD5A, transcript variant X4	protein_coding	XP_010912212.1		41	84	77	139	46	60	193	129	283514940787905	600154325397959	222701947282689	370234923381348	332319349937116	370789614405374	52234005095116	375704883522749	-0.5337	0.8778	3552	0.5675	nonDE
105038194	XM_010913915	LOC105038194	AT-hook motif nuclear-localized protein 10	protein_coding	XP_010912217.1	.	10	8	124	125	14	24	170	108	0.691499855580255	0.571575547998057	358636902117577	332945074983226	101140671719992	14831584576215	460092272858534	314543623414394	-0.5657	0.3548	2528	0.8017	nonDE
105038198	XM_010913921	LOC105038198	DEAD-box ATP-dependent RNA helicase 20	protein_coding	XP_010912223.1	.	52	21	136	113	13	29	63	63	359579924901733	15003858134949	393343699096698	300982347784836	0.939163380257066	179214980295931	170504783471104	183483780325063	0.7631	0.8908	2.73	0.5604	nonDE
105038199	XM_010913922,XM_029262512,XM_029262513	LOC105038199	glucomannan 4-beta-mannosyltransferase 9, transcript variant X1	protein_coding	XP_010912224.1		0	17	215	240	70	54	153	335	0	121459803949587	621830112542574	639254543967794	505703358599959	333710652964837	414083045572681	975667720776131	-1118	0.384	2.94	0.7864	nonDE
105038201	XM_010913926	LOC105038201	histone deacetylase HDT2	protein_coding	XP_010912228.1	.	276	207	263	226	71	82	177	230	19085396014015	147895173044497	760657300459055	601964695569673	512927692294244	506745806354012	479037248799768	669861420234358	0.6901	1224	4586	0.4276	nonDE
105038202	XM_029262514,XM_029262515,XM_029262516,XR_003799768	LOC105038202	protein ROS1A-like, transcript variant X4	protein_coding	XP_029118347.1		174	115	183	201	194	164	303	350	120320974870964	821639850247206	529278653931586	535375680573028	140152073669131	101349161270802	820046815741976	101935433513924	-0.7491	1871	4788	0.2205	nonDE
105038203	XM_010913928	LOC105038203	arogenate dehydratase/prephenate dehydratase 6, chloroplastic	protein_coding	XP_010912230.1	.	0	7	147	225	18	25	433	391	0	0.5001286044983	425158262994225	599301134969807	130038006497132	154495672668906	117188208322203	113876441439841	-1808	0.3292	2544	0.8151	nonDE
105038209	XM_010913935	LOC105038209	2-carboxy-D-arabinitol-1-phosphatase	protein_coding	XP_010912237.1	.	936	619	86	40	252	428	60	26	647243864823119	442256580263496	248732045017029	106542423994632	182053209095985	264496591609167	162385508067718	757234648960579	0.7714	0.1981	4432	0.8908	nonDE
105038211	XM_010913937	LOC105038211	fructose-bisphosphate aldolase 1, cytoplasmic	protein_coding	XP_010912239.1	.	524	365	844	747	92	191	324	446	362345924324054	260781343774113	24410447208648	198967976809976	664638699874232	118034693919044	876881743565677	129894866706315	1169	2875	5655	0.1091	nonDE
105038218	XM_010913944,XM_010913945,XM_010913946,XM_019848766	LOC105038218	serine/threonine-protein kinase D6PKL1, transcript variant X4	protein_coding	XP_010912246.1		11	22	82	133	39	49	79	74	0.760649841138281	157183275699466	237163112690656	354253559782153	28174901407712	302811518431056	213807585622495	215520630858011	-0.01254	0.009824	2759	0.9962	nonDE
105038219	XM_010913947	LOC105038219	probable glycosyltransferase 2	protein_coding	XP_010912249.1	.	29	50	241	222	72	94	288	205	200534958118274	357234717498785	697028172664001	59131045317021	520152025988529	580903729235086	779450438725046	597050396295841	-0.6327	0.7308	4003	0.6326	nonDE
105038220	XM_010913948	LOC105038220	60S acidic ribosomal protein P2B	protein_coding	XP_010912250.1	.	45	36	101	111	27	15	54	87	311174935011115	257208996599126	29211554124093	295655226585105	195057009745698	0.926974036013436	146146957260946	25338236330604	0.5851	0.8269	2786	0.5914	nonDE
105038221	XM_010913949,XM_019848662	LOC105038221	protein BUD31 homolog 2, transcript variant X1	protein_coding	XP_010912251.1		216	135	398	310	95	191	225	223	149363968805335	964533737246721	115110876647416	825703785958401	686311700957087	118034693919044	608945655253942	649474333531574	0.3432	0.7033	4838	0.6423	nonDE
105038222	XM_010913950	LOC105038222	IQ domain-containing protein IQM3	protein_coding	XP_010912252.1	.	33	25	199	173	44	32	315	222	228194952341484	178617358749393	57555438323708	460795983776785	317870682548546	1977544610162	85252391735552	646561892574033	-0.431	0.3036	3573	0.8285	nonDE
105038224	XM_010913951	LOC105038224	uncharacterized LOC105038224	protein_coding	XP_010912253.2	.	54	45	79	100	29	12	61	44	373409922013338	321511245748907	228486413445876	266356059986581	209505677134269	0.741579228810749	16509193320218	12814740213179	0.747	1063	2669	0.4875	nonDE
105038225	XM_010913952,XM_010913953,XM_019847126,XM_019847129	LOC105038225	copper transport protein ATX1, transcript variant X1	protein_coding	XP_010912254.1		108	67	199	159	19	41	79	135	746819844026676	478694521448372	57555438323708	423506135378664	137262340191417	253372903177006	213807585622495	393179529267993	0.7528	1291	3502	0.3999	nonDE
105038231	XM_010913958	LOC105038231	R3H domain-containing protein 1	protein_coding	XP_010912260.1	.	71	88	131	123	111	89	162	148	490964897461981	628733102797862	378882533688731	327617953783495	801901040065649	550004594701305	438440871782839	431041261716022	-0.4739	1.1	3953	0.4693	nonDE
105038235	XM_010913967,XM_010913969,XM_029262524	LOC105038235	probable sodium/metabolite cotransporter BASS4, chloroplastic, transcript variant X3	protein_coding	XP_010912269.1		162	130	87	72	51	78	111	55	112022976604001	928810265496842	251624278098623	191776363190338	368441018408541	482026498726987	300413189925278	160184252664738	0.4754	0.3575	3593	0.8017	nonDE
105038237	XM_010913971	LOC105038237	uncharacterized LOC105038237	protein_coding	XP_010912273.1	.	126	72	495	586	70	151	569	499	871289818031121	514417993198251	143165537538872	156084651152136	505703358599959	933153862920192	153995590150886	14533080378128	-0.2318	0.1732	4998	0.906	nonDE
105038239	XM_019848520,XM_019848521,XM_029262525,XM_029262526,XM_029262527	LOC105038239	pentatricopeptide repeat-containing protein At1g22960, mitochondrial, transcript variant X1	protein_coding	XP_019704079.1		80	67	59	69	53	41	88	61	553199884464204	478694521448372	170641751814009	183785681390741	382889685797112	253372903177006	238165411832653	177658898409982	-0.1075	0.1129	3.14	0.939	nonDE
105038241	XM_010913975	LOC105038241	ACT domain-containing protein ACR12	protein_coding	XP_010912277.1	.	140	104	154	158	100	68	203	158	968099797812357	743048212397474	445403894565378	420842574778798	722433369428513	420228229659424	549404302295779	460165671291429	-0.04974	0.0704	4164	0.9599	nonDE
105038242	XM_010913976,XM_010913977,XM_010913978,XM_010913979,XM_010913980,XM_010913982	LOC105038242	uncharacterized LOC105038242, transcript variant X1	protein_coding	XP_010912278.1		260	300	437	461	290	244	826	666	179789962450866	214340830499271	12639058566563	122790143653814	209505677134269	150787776524852	223550716106558	19396856777221	-0.5365	1609	5779	0.2883	nonDE
105038245	XM_010913984,XM_029262528,XR_003799772,XR_003799773	LOC105038245	transcription factor TGAL5, transcript variant X3	protein_coding	XP_010912286.1		558	460	765	890	431	392	885	552	385856919413782	328655940098883	221255830741893	237056893388057	311368782223689	242249214744845	239518624399884	160766740856246	0.09342	0.1815	6349	0.8989	nonDE
105038248	XM_010913989,XM_010913990	LOC105038248	cell division protein FtsZ homolog 2-2, chloroplastic, transcript variant X2	protein_coding	XP_010912291.1		285	215	57	37	70	115	50	17	197077458840373	153610928524478	164857285650822	98551742195035	505703358599959	710680094276967	135321256723098	495114962781917	1506	0.6497	3366	0.6636	nonDE
105038252	XM_010913996	LOC105038252	signal recognition particle 54 kDa protein, chloroplastic	protein_coding	XP_010912298.1	.	316	287	49	92	223	260	61	50	218513954363361	205052727844303	141719420998075	245047575187654	161102641382558	160675499575662	16509193320218	145622047877034	0.1896	0.06192	4154	0.966	nonDE
105038253	XM_010913997	LOC105038253	40S ribosomal protein S25	protein_coding	XP_010912299.1	.	209	144	346	333	64	149	261	234	144523469816273	10288359863965	10007126462313	886965679755315	462357356434248	920794209106679	706376960094573	681511184064521	0.4315	1024	4751	0.4995	nonDE
105038259	XM_010914003	LOC105038259	rho GTPase-activating protein 1	protein_coding	XP_010912305.1	.	188	135	81	87	201	220	75	92	130001972849088	964533737246721	234270879609063	231729772188325	145209107255131	135956191948637	202981885084648	267944568093743	-0.3025	0.1523	4102	0.9147	nonDE
105038263	XM_010914009,XM_029263731	LOC105038263	putative aminoacrylate hydrolase RutD, transcript variant X1	protein_coding	XP_010912311.1		28	13	123	198	119	169	299	255	193619959562471	0.928810265496842	355744669035984	52738499877343	85969570961993	10443907472418	809221115204128	742672444172876	-1342	2027	3858	0.1972	nonDE
105038265	XM_010914010	LOC105038265	40S ribosomal protein S14	protein_coding	XP_010912312.1	.	209	119	356	341	59	152	230	194	144523469816273	850218627647109	102963497704724	908274164554241	426235687962822	939333689826948	622477780926252	565013545762894	0.5424	1147	4659	0.4509	nonDE
105038275	XM_010914025	LOC105038275	mitochondrial fission protein ELM1	protein_coding	XP_010912327.1	.	77	91	111	71	47	56	65	80	532454888796796	650167185847789	321037872056864	189112802590472	339543683631401	346070306778349	175917633740028	232995276603255	0.3836	0.486	3334	0.7421	nonDE
105038276	XM_010914029,XM_019846101	LOC105038276	uncharacterized LOC105038276, transcript variant X1	protein_coding	XP_010912331.1		88	59	116	106	39	21	184	138	608519872910624	421536966648567	33549903746483	282337423585776	28174901407712	129776365041881	497982224741002	401916852140615	-0.2007	0.2161	3438	0.8818	nonDE
105038277	XM_010914026,XM_010914030	LOC105038277	nicalin, transcript variant X2	protein_coding	XP_010912328.1		106	91	238	273	73	80	231	196	73298984691507	650167185847789	688351473419221	727152043763366	527376359682814	494386152540499	625184206060714	570838427677975	0.1242	0.2455	4302	0.8649	nonDE
105038286	XM_010914040,XM_010914041,XM_029262538,XM_029262539,XR_003799781,XR_830695,XR_830696	LOC105038286	MTOR-associated protein MEAK7, transcript variant X4	protein_coding	XP_010912342.1		120	93	100	117	78	88	135	116	829799826696306	664456574547741	289223308159337	3116365901843	56349802815424	543824767794549	365367393152366	33784315107472	-0.1289	0.1594	3858	0.9107	nonDE
105038290	XM_010914045,XM_010914046,XM_010914048,XM_010914049,XM_029262542,XM_029262543,XM_029262544	LOC105038290	serine/arginine-rich splicing factor 4, transcript variant X6	protein_coding	XP_010912347.1		53	61	69	79	33	35	49	58	366494923457535	435826355348518	199564082629942	210421287389399	238403011911409	216293941736468	132614831588636	16892157553736	0.4428	0.7083	2875	0.6402	nonDE
105038291	XM_010914052	LOC105038291	ubiquitin-conjugating enzyme E2 variant 1D	protein_coding	XP_010912354.1	.	65	68	173	135	60	47	165	176	449474906127166	485839215798348	500356323115652	359580680981884	433460021657108	290451864617543	446560147186225	512589608527161	-0.1447	0.2273	3768	0.8756	nonDE
105038292	XM_010914056,XM_019853611,XM_029263748,XR_002165703	LOC105038292	uncharacterized LOC105038292, transcript variant X3	protein_coding	XP_010912358.1		467	443	732	784	287	293	816	681	322930432555979	316509959703924	211711461572634	208823151029479	207338377025983	181068928367958	220844290972096	198337229208521	0.1411	0.4048	6177	0.776	nonDE
105038301	XM_010914068	LOC105038301	protein NLP3	protein_coding	XP_010912370.2	.	54	55	260	249	53	0	173	235	373409922013338	392958189248664	751980601214275	663226589366587	382889685797112	0	46821154826192	684423625022062	0.5434	0.2051	3097	0.8864	nonDE
105038310	XM_010914074	LOC105038310	two-component response regulator-like APRR3	protein_coding	XP_010912376.1	.	1088	846	216	188	658	817	196	144	752351842871318	604441142007945	624722345624167	500749392774772	475361157083961	504891858281985	530459326354545	419391497885859	0.2088	0.06759	5766	0.9616	nonDE
105038316	XM_010914080	LOC105038316	digalactosyldiacylglycerol synthase 1, chloroplastic	protein_coding	XP_010912382.1	.	99	46	170	152	118	135	107	106	684584857024453	328655940098883	491679623870872	404861211179603	852471375925645	834276632412092	28958748938743	308718741499313	-0.1745	0.1669	3933	0.9085	nonDE
105038317	XM_010914081,XM_010914082,XR_830701	LOC105038317	transcription factor LHW, transcript variant X3	protein_coding	XP_010912383.2		45	60	140	184	44	46	157	114	311174935011115	428681660998542	404912631423071	490095150375309	317870682548546	284272037710787	424908746110529	332018269159638	0.02319	0.02704	3551	0.9874	nonDE
105038319	XM_019848449,XM_019848450,XM_029262548	LOC105038319	BEL1-like homeodomain protein 1, transcript variant X3	protein_coding	XP_019704008.1		268	189	88	110	145	123	95	59	185321961295508	135034723214541	254516511180216	292991665985239	104752838567134	760118709531017	257110387773887	171834016494901	0.4763	0.2746	4083	0.844	nonDE
105038321	XM_010914088,XM_010914089,XR_003799788	LOC105038321	uncharacterized LOC105038321, transcript variant X2	protein_coding	XP_010912390.1		233	262	416	354	192	161	420	386	161119466350199	187190991969364	120316896194284	942900452352497	138707206930274	994952131987754	113669855647403	112420220961071	0.004413	0.008036	5.31	0.9962	nonDE
105038322	XM_010914092,XM_029262549	LOC105038322	probable Histone-lysine N-methyltransferase ATXR5, transcript variant X2	protein_coding	XP_010912394.1		35	24	50	78	45	61	66	67	242024949453089	171472664399417	144611654079668	207757726789533	325095016242831	376969441312131	17862405887449	195133544155226	-0.346	0.4588	2808	0.7535	nonDE
105038328	XM_010914097,XM_010914098	LOC105038328	PH, RCC1 and FYVE domains-containing protein 1, transcript variant X1	protein_coding	XP_010912399.1		490	414	554	440	416	773	619	599	338834929234325	295790346088994	160229712720272	117196666394096	300532281682261	477700619892257	167527715823196	174455213356687	-0.5171	0.7032	6187	0.6423	nonDE
105038335	XM_010914104	LOC105038335	actin-101	protein_coding	XP_010912406.1	.	542	541	662	810	297	421	479	648	374792921724498	386527964333686	191465830001481	215748408589131	214562710720268	260170712774438	129637763940728	188726174048637	0.3309	0.663	6194	0.6564	nonDE
105038336	XM_010914106	LOC105038336	histone H3.2	protein_coding	XP_010912408.1	.	10	8	73	135	7	17	123	140	0.691499855580255	0.571575547998057	211133014956316	359580680981884	0.505703358599959	105057057414856	332890291538822	407741734055696	-0.6715	0.3754	2256	0.789	nonDE
105038338	XM_010914109	LOC105038338	ubiquitin carboxyl-terminal hydrolase MINDY-3	protein_coding	XP_010912411.1	.	37	55	127	119	71	59	239	172	255854946564694	392958189248664	367313601362358	316963711384031	512927692294244	364609787498618	64683560713641	500939844696998	-0.7493	1528	3684	0.3177	nonDE
105038342	XM_010914113,XM_010914116	LOC105038342	exocyst complex component SEC5B, transcript variant X1	protein_coding	XP_010912415.1		105	139	384	448	213	214	393	393	726074848359268	993112514646623	111061750333185	119327514873988	153878307688273	132248295804583	106362507784355	114458929631349	-0.4857	1008	5142	0.5067	nonDE
105038343	XM_010914118,XM_010914127,XM_010914137,XM_029263768	LOC105038343	protein PLASTID TRANSCRIPTIONALLY ACTIVE 7, transcript variant X1	protein_coding	XP_010912420.1		518	458	66	53	142	291	27	31	358196925190572	327227001228887	190887383385162	141168711792888	102585538458849	179832962986607	730734786304731	902856696837613	1561	0.5397	3991	0.7216	nonDE
105038348	XM_010914129,XM_010914130	LOC105038348	tubby-like F-box protein 14, transcript variant X1	protein_coding	XP_010912431.1		68	73	108	153	108	27	247	181	470219901794573	521562687548227	312361172812084	407524771779469	780228038982794	166855326482418	668487008212106	527151813314865	-0.4172	0.4092	3811	0.7744	nonDE
105038350	XM_010914132,XM_010914133,XM_010914134,XM_010914136,XR_003799794	LOC105038350	protein FAM135B, transcript variant X4	protein_coding	XP_010912434.1		165	151	412	536	62	68	307	303	114097476170742	107884884684633	119160002961647	142766848152807	447908689045678	420228229659424	830872516279824	882469610134829	0.7033	1.16	4764	0.4433	nonDE
105038355	XM_010914142,XM_010914143	LOC105038355	uncharacterized LOC105038355, transcript variant X1	protein_coding	XP_010912444.1		4	35	92	68	10	19	59	49	0.276599942232102	25006430224915	26608544350659	181122120790875	0.722433369428513	117416711228369	159679082933256	142709606919494	0.2163	0.1127	2.04	0.9392	nonDE
105038356	XM_010914144	LOC105038356	protein MAK16 homolog	protein_coding	XP_010912446.1	.	55	43	61	58	27	30	83	69	38032492056914	307221857048955	176426217977195	154486514792217	195057009745698	185394807202687	224633286160343	200958426070308	-0.3069	0.4923	2804	0.7401	nonDE
105038358	XM_010914145	LOC105038358	60S ribosomal protein L3	protein_coding	XP_010912447.1	.	168	139	420	200	76	85	194	265	116171975737483	993112514646623	121473789426921	532712119973162	54904936076567	52528528707428	525046476085622	771796853748282	0.4207	0.7206	4548	0.6364	nonDE
105038359	XM_010914146,XM_010914147	LOC105038359	COP9 signalosome complex subunit 8, transcript variant X1	protein_coding	XP_010912448.1		70	46	91	102	36	57	81	108	484049898906179	328655940098883	263193210424996	271683181186313	260076012994265	352250133685106	219220435891419	314543623414394	-0.02535	0.03325	3273	0.9833	nonDE
105038362	XM_010914154,XM_019854472	LOC105038362	importin subunit beta-1, transcript variant X1	protein_coding	XP_010912456.1		515	641	902	973	476	531	1101	1092	356122425623831	457974907833443	260879423959722	259164446366943	343878283847972	328148808748756	297977407304262	318038552563443	-0.2014	0.6138	6675	0.6853	nonDE
105038363	XM_010914153,XR_830715	LOC105038363	RNA-binding protein 39, transcript variant X2	protein_coding	XP_010912455.1	.	71	52	79	58	55	69	90	61	490964897461981	371524106198737	228486413445876	154486514792217	397338353185682	42640805656618	243578262101577	177658898409982	-0.2488	0.3058	3198	0.8285	nonDE
105038368	XM_010914157,XM_029262557	LOC105038368	40S ribosomal protein S10-1, transcript variant X1	protein_coding	XP_010912459.1		199	142	271	223	68	147	196	230	137608471260471	101454659769655	783795165111802	593974013770076	491254691211389	908434555293167	530459326354545	669861420234358	0.2637	0.4817	4578	0.7445	nonDE
105038371	XM_010914162	LOC105038371	uncharacterized LOC105038371	protein_coding	XP_010912464.1	.	0	0	91	90	0	0	71	74	0	0	263193210424996	239720453987923	0	0	1921561845468	215520630858011	0.1322	0.01825	-0.1797	0.9912	nonDE
105038382	XM_010914175,XM_019848677,XR_830722	LOC105038382	long chain acyl-CoA synthetase 9, chloroplastic, transcript variant X3	protein_coding	XP_010912477.1		483	560	109	133	322	481	228	178	333994430245263	40010288359864	315253405893677	354253559782153	232623544955981	297249674214975	617064930657328	518414490442243	-0.413	0.1804	5201	0.9002	nonDE
105038385	XM_010914178	LOC105038385	V-type proton ATPase 16 kDa proteolipid subunit	protein_coding	XP_010912480.1	.	0	8	59	67	15	0	57	64	0	0.571575547998057	170641751814009	178458560191009	108365005414277	0	154266232664332	186396221282604	-0.3114	0.06333	0.7548	0.9654	nonDE
105038387	XM_010914180,XM_010914181,XM_010914182	LOC105038387	CBS domain-containing protein CBSCBSPB3, transcript variant X2	protein_coding	XP_010912482.1		212	169	41	58	165	218	61	35	146597969383014	120745334514589	118581556345328	154486514792217	119201505955705	134720226567286	16509193320218	101935433513924	-0.001718	0.0005601	3723	0.9997	nonDE
105038391	XM_010914189	LOC105038391	serine/threonine-protein kinase SAPK7	protein_coding	XP_010912491.2	.	48	26	88	67	27	79	101	106	331919930678522	185762053099368	254516511180216	178458560191009	195057009745698	488206325633743	273348938580659	308718741499313	-0.5781	1023	3067	0.5002	nonDE
105038393	XM_010914191	LOC105038393	fructose-bisphosphate aldolase, chloroplastic	protein_coding	XP_010912493.1	.	9377	6341	2	15	2165	3918	0	0	648419414577605	45304506873196	0.578446616318673	399534089979871	156406824481273	242125618206709	0	0	6334	0.5816	3661	0.7009	nonDE
105038397	XM_010914198	LOC105038397	mitochondrial import inner membrane translocase subunit PAM16 like 2	protein_coding	XP_010912500.1	.	99	74	100	137	26	35	80	58	684584857024453	528707381898202	289223308159337	364907802181616	187832676051413	216293941736468	216514010756957	16892157553736	0.866	1635	3232	0.2816	nonDE
105038409	XM_010914214	LOC105038409	uncharacterized LOC105038409	protein_coding	XP_010912516.2	.	86	62	114	73	102	100	174	191	594689875799019	442971049698494	329714571301644	194439923790204	736882036817083	617982690675624	470917973396382	556276222890272	-1001	2191	3871	0.1755	nonDE
105038410	XM_010914216,XM_010914217	LOC105038410	zinc finger transcription factor YY1, transcript variant X2	protein_coding	XP_010912518.1		57	45	118	99	62	134	157	106	394154917680745	321511245748907	341283503628017	263692499386715	447908689045678	828096805505336	424908746110529	308718741499313	-0.6587	1172	3.64	0.4392	nonDE
105038412	XM_010914220	LOC105038412	transmembrane 9 superfamily member 1	protein_coding	XP_010912522.1	.	126	261	741	703	288	187	684	693	871289818031121	186476522534366	214314471346068	187248310170566	208060810395412	115562763156342	185119479197199	20183215835757	-0.2992	0.3434	5719	0.8067	nonDE
105038413	XM_010914223,XM_029262564	LOC105038413	threonylcarbamoyladenosine tRNA methylthiotransferase, transcript variant X2	protein_coding	XP_010912525.1		95	86	237	257	45	84	189	168	656924862801242	614443714097911	685459240337628	684535074165513	325095016242831	519105460167524	511514350413312	489290080866836	0.2994	0.6043	4119	0.6893	nonDE
105038414	XM_010914224	LOC105038414	patellin-3	protein_coding	XP_010912526.1	.	29	16	632	612	37	48	380	594	200534958118274	114315109599611	182789130756701	163009908711788	26730034668855	296631691524299	102844155109555	172998992877917	-0.3685	0.1274	4159	0.9305	nonDE
105038419	XM_010914231	LOC105038419	serine hydroxymethyltransferase 7	protein_coding	XP_010912533.1	.	28	43	115	120	30	38	99	75	193619959562471	307221857048955	332606804383237	319627271983897	216730010828554	234833422456737	267936088311735	218433071815552	0.1922	0.2689	3035	0.8498	nonDE
105038424	XM_010914235,XM_029262565,XR_002164042,XR_003799797	LOC105038424	ABC transporter D family member 1, transcript variant X4	protein_coding	XP_010912537.1		571	668	680	813	394	452	1228	1072	394846417536326	477265582578377	196671849548349	21654747676909	284638747554834	279328176185382	33234900651193	312213670648362	-0.2207	0.4254	6571	0.767	nonDE
105038426	XM_010914237	LOC105038426	SWI/SNF complex subunit SWI3C	protein_coding	XP_010912539.1	.	134	88	149	175	103	48	177	155	926609806477542	628733102797862	430942729157412	466123104976517	744106370511368	296631691524299	479037248799768	451428348418807	0.09212	0.1195	4054	0.9345	nonDE
105038428	XM_010914239,XM_010914240	LOC105038428	NAC domain-containing protein 48, transcript variant X2	protein_coding	XP_010912541.1		220	122	436	307	125	269	283	287	152129968227656	871652710697036	126101362357471	817713104158804	903041711785641	166237343791743	765918313052737	835870554814178	-0.04277	0.05316	5035	0.9713	nonDE
105038429	XM_019848768	LOC105038429	probable L-ascorbate peroxidase 6, chloroplastic/mitochondrial	protein_coding	XP_019704327.1	.	36	39	150	71	15	0	156	171	248939948008892	278643079649053	433834962239005	189112802590472	108365005414277	0	422202320976067	498027403739458	0.3536	0.1145	2.34	0.9383	nonDE
105038430	XR_002163869	LOC105038430	DNA-directed RNA polymerase subunit 10-like protein	lncRNA	.	.	14	39	173	166	26	50	82	85	0.968099797812357	278643079649053	500356323115652	442151059577724	187832676051413	308991345337812	221926861025881	247557481390959	0.5178	0.4953	3.04	0.7377	nonDE
105038431	XM_010914243	LOC105038431	isocitrate dehydrogenase [NAD] catalytic subunit 5, mitochondrial	protein_coding	XP_010912545.1	.	112	149	258	324	108	135	244	217	774479838249886	106455945814638	746196135051088	862993634356522	780228038982794	834276632412092	66036773280872	631999687786329	0.05587	0.1102	4638	0.9405	nonDE
105038433	XM_010914245,XM_010914247,XM_010914248,XM_010914250,XM_010914251,XM_019847761,XM_029262567	LOC105038433	probable anion transporter 6, transcript variant X7	protein_coding	XP_010912547.1		16	27	110	118	32	46	94	158	110639976892841	192906747449344	31814563897527	314300150784166	231178678217124	284272037710787	254403962639425	460165671291429	-0.3271	0.3334	3013	0.8128	nonDE
105038456	XM_019848013	LOC105038456	WD repeat-containing protein 20-like	protein_coding	XP_019703572.1	.	52	91	238	164	37	42	76	95	359579924901733	650167185847789	688351473419221	436823938377993	26730034668855	259552730083762	205688310219109	276681890966365	0.8712	1474	3516	0.3312	nonDE
105038457	XM_010914269	LOC105038457	malate dehydrogenase, mitochondrial	protein_coding	XP_010912571.1	.	197	175	231	371	96	207	181	272	13622547154931	125032151124575	668105841848068	988180982550215	693536034651372	127922416969854	489862949337616	792183940451067	0.2302	0.3284	4816	0.8152	nonDE
105038463	XM_010914305	LOC105038463	N-terminal acetyltransferase A complex auxiliary subunit NAA15	protein_coding	XP_010912607.1	.	561	513	888	889	404	406	1015	729	387931418980523	366522820153754	256830297645491	23679053732807	291863081249119	250900972414303	27470215114789	212316945804716	0.04291	0.1032	6465	0.9443	nonDE
105038466	XM_010914272	LOC105038466	amino acid permease 3	protein_coding	XP_010912574.1	.	0	0	62	68	0	0	59	80	0	0	179318451058789	181122120790875	0	0	159679082933256	232995276603255	-0.3306	0.0476	-0.3178	0.9751	nonDE
105038468	XM_010914274	LOC105038468	dihydrolipoyllysine-residue acetyltransferase component 5 of pyruvate dehydrogenase complex, chloroplastic	protein_coding	XP_010912576.1	.	196	124	91	105	45	0	62	81	13553397169373	885942099396988	263193210424996	27967386298591	325095016242831	0	167798358336642	235907717560796	1.86	0.557	2726	0.7121	nonDE
105038476	XM_010914283	LOC105038476	GDSL esterase/lipase At1g31550	protein_coding	XP_010912585.1	.	103	182	165	209	143	219	381	216	712244851247663	130033437169558	477218458462905	556684165371954	103307971828277	135338209257962	103114797623001	629087246828789	-0.6998	1346	4716	0.3776	nonDE
105038477	XM_010914280	LOC105038477	TOM1-like protein 4	protein_coding	XP_010912582.1	.	206	207	411	454	127	142	407	504	142448970249533	147895173044497	118870779653487	120925651233908	917490379174211	877535420759386	110151502972602	146787024260051	0.05097	0.0835	5233	0.9551	nonDE
105038493	XM_010914312,XM_010914313	LOC105038493	mitogen-activated protein kinase kinase kinase 3, transcript variant X2	protein_coding	XP_010912614.1		952	743	487	633	515	590	517	461	658307862512403	530850790203195	140851751073597	168603385971506	372053185255684	364609787498618	139922179451684	134263528142626	0.2451	0.1894	6365	0.8958	nonDE
105038496	gene-LOC105038496	LOC105038496	.	pseudogene	.	.	252	168	91	98	163	174	151	90	174257963606224	120030865079592	263193210424996	261028938786849	117756639216848	107528988177559	408670195303757	262119686178662	-0.2108	0.1191	4278	0.9347	nonDE
105038499	XM_010914321	LOC105038499	GDP-L-galactose phosphorylase 1	protein_coding	XP_010912623.1	.	239	209	83	84	82	156	169	179	165268465483681	149324111914492	240055345772249	223739090388728	59239536293138	964052997453973	457385847724072	521326931399783	-0.3648	0.2449	4265	0.8653	nonDE
105038500	XM_010914323	LOC105038500	phosphatidylinositol 4-kinase beta 1	protein_coding	XP_010912625.1	.	181	205	409	322	158	132	342	438	125161473860026	146466234174502	118292333037169	857666513156791	114144472369705	815737151691823	925597395985993	127564913940282	-0.04535	0.0772	5115	0.9586	nonDE
105038501	XM_010914324,XR_003799804,XR_003799805	LOC105038501	probable inactive ATP-dependent zinc metalloprotease FTSHI 4, chloroplastic, transcript variant X3	protein_coding	XP_010912626.1	.	329	309	191	193	114	83	179	92	227503452485904	220771055414249	552416518584333	514067195774101	823574041148504	512925633260768	484450099068692	267944568093743	0.9295	0.9472	4528	0.5407	nonDE
105038505	XM_010914328	LOC105038505	alcohol dehydrogenase 1	protein_coding	XP_010912630.1	.	318	132	397	334	20	32	267	158	219896954074521	943099654196793	114821653339257	88962924035518	144486673885703	1977544610162	722615510901345	460165671291429	1203	1514	4288	0.3197	nonDE
105038507	XM_010914331	LOC105038507	uncharacterized protein C57A10.07	protein_coding	XP_010912633.1	.	18	17	58	65	20	43	71	58	124469974004446	121459803949587	167749518732415	173131438991278	144486673885703	265732556990518	1921561845468	16892157553736	-0.3569	0.4028	2405	0.7769	nonDE
105038509	XM_010914333,XM_029262572	LOC105038509	DAG protein, chloroplastic, transcript variant X2	protein_coding	XP_010912635.1		203	267	342	248	58	202	222	204	140374470682792	190763339144351	989143713904931	660563028766721	419011354268537	124832503516476	600826379850557	5941379553383	0.5533	0.8378	4785	0.5861	nonDE
105038510	XM_010914334,XM_019848671,XM_029262573,XM_029262574	LOC105038510	uncharacterized protein At4g06598, transcript variant X2	protein_coding	XP_010912636.1		231	457	366	586	328	525	842	595	159736466639039	32651253179389	105855730786317	156084651152136	236958145172552	324440912604703	227880996321698	173290236973671	-0.6838	1314	5988	0.3905	nonDE
105038511	XM_019848699	LOC105038511	serine/arginine-rich splicing factor SR45	protein_coding	XP_019704258.1	.	108	71	135	107	82	66	98	122	746819844026676	507273298848275	390451466015104	285000984185642	59239536293138	407868575845912	265229663177273	355317796819964	0.07717	0.09714	3738	0.9466	nonDE
105038513	XM_010914339	LOC105038513	DNA mismatch repair protein MLH1	protein_coding	XP_010912641.1	.	155	159	276	401	151	169	488	349	10718247761494	113600640164614	798256330519769	106808780054619	109087438783705	10443907472418	132073546561744	10164418941817	-0.3647	1033	5.07	0.4956	nonDE
105038515	XM_029262575	LOC105038515	receptor protein-tyrosine kinase CEPR2	protein_coding	XP_029118408.1	.	190	239	1529	2004	76	64	1386	1560	131384972560248	170758194964419	442222438175626	533777544213108	54904936076567	395508922032399	375110523636429	454340789376347	0.5664	0.2478	5938	0.864	nonDE
105038519	XM_010914349	LOC105038519	prohibitin-1, mitochondrial	protein_coding	XP_010912651.1	.	49	46	76	85	10	11	50	43	338834929234325	328655940098883	219809714201096	226402650988594	0.722433369428513	0.679780959743186	135321256723098	12523496117425	0.9468	1056	2379	0.4885	nonDE
105038520	XM_019848517,XM_029262577	LOC105038520	MACPF domain-containing protein At4g24290, transcript variant X2	protein_coding	XP_019704076.1		128	79	340	430	93	179	388	327	885119815142727	564430853648081	983359247741744	11453310579423	671863033568517	110618901630937	105009295217124	952368193115805	-0.2768	0.3784	4.83	0.7881	nonDE
105038524	XM_019848770	LOC105038524	immune-associated nucleotide-binding protein 9	protein_coding	XP_019704329.1	.	132	189	196	208	71	19	104	90	912779809365937	135034723214541	5668776839923	554020604772088	512927692294244	117416711228369	281468213984045	262119686178662	1281	2246	3845	0.1675	nonDE
105038525	XM_010914355,XM_010914356,XM_019848554,XR_003799806	LOC105038525	cullin-associated NEDD8-dissociated protein 1, transcript variant X1	protein_coding	XP_010912657.1		547	496	728	748	342	302	624	603	3782504210024	354376839758795	210554568339997	199234332869963	247072212344551	186630772584038	168880928390427	175620189739704	0.302	0.8273	6183	0.5914	nonDE
105038527	XM_010914359,XM_010914360	LOC105038527	protein SUPPRESSOR OF GENE SILENCING 3 homolog, transcript variant X2	protein_coding	XP_010912661.1		110	123	270	340	69	94	217	213	760649841138281	878797405047012	780902932030209	905610603954375	498479024905674	580903729235086	587294254178247	620349923956167	0.3281	0.7944	4447	0.6054	nonDE
105038529	XM_010914365	LOC105038529	cleft lip and palate transmembrane protein 1 homolog	protein_coding	XP_010912667.1	.	432	382	631	761	581	472	707	619	29872793761067	272927324169072	182499907448541	202696961649788	419733787637966	291687829998894	191344257006461	180280095271769	-0.328	0.6407	6274	0.6701	nonDE
105038535	XM_010914373,XM_010914374,XM_019848681,XM_019848682	LOC105038535	zinc finger CCCH domain-containing protein 16, transcript variant X2	protein_coding	XP_010912675.1		115	138	129	118	107	103	80	78	795224833917293	985967820296648	373098067525544	314300150784166	773003705288509	636522171395893	216514010756957	227170394688174	0.4446	0.4501	3888	0.7565	nonDE
105038542	XM_010914384	LOC105038542	far upstream element-binding protein 1	protein_coding	XP_010912686.1	.	460	446	504	438	136	317	471	371	318089933566917	318653368008917	145768547312306	116663954274122	982509382422777	195900512944173	127472623833159	10805155952476	0.4337	0.7	5674	0.6434	nonDE
105038545	XM_010914386	LOC105038545	uncharacterized LOC105038545	protein_coding	XP_010912688.1	.	135	192	103	98	136	121	235	157	933524805033344	137178131519534	297900007404117	261028938786849	982509382422777	747759055717505	636009906598562	457253230333888	-0.5684	0.6101	4294	0.6854	nonDE
105038550	XM_010914389,XR_003799812,XR_003799813,XR_003799814,XR_830749	LOC105038550	putative methyltransferase At1g22800, mitochondrial, transcript variant X1	protein_coding	XP_010912691.1	.	24	28	78	57	12	15	46	41	165959965339261	20005144179932	225594180364283	151822954192351	0.866920043314215	0.926974036013436	12449555618525	119410079259168	0.5531	0.5304	2159	0.724	nonDE
105038554	XM_010914399	LOC105038554	ras-related protein RABA2a	protein_coding	XP_010912701.1	.	68	81	237	215	12	43	230	207	470219901794573	578720242348032	685459240337628	572665528971149	0.866920043314215	265732556990518	622477780926252	602875278210922	0.1124	0.0878	3736	0.953	nonDE
105038567	XM_010914408	LOC105038567	CLP protease regulatory subunit CLPX1, mitochondrial	protein_coding	XP_010912710.1	.	43	82	93	94	76	47	64	53	29734493789951	585864936698008	268977676588183	250374696387386	54904936076567	290451864617543	173211208605566	154359370749656	0.4646	0.7042	3208	0.6423	nonDE
105038571	XM_010914457	LOC105038571	protein FAR1-RELATED SEQUENCE 11	protein_coding	XP_010912759.1	.	154	120	236	188	110	89	324	159	106490977759359	857363321997085	682567007256034	500749392774772	794676706371364	550004594701305	876881743565677	463078112248969	-0.04622	0.06347	4466	0.9654	nonDE
105038580	XM_010914429,XM_019848246	LOC105038580	heparan-alpha-glucosaminide N-acetyltransferase, transcript variant X1	protein_coding	XP_010912731.1		163	81	87	179	18	0	99	72	112714476459582	578720242348032	251624278098623	47677734737598	130038006497132	0	267936088311735	20969574894293	1854	0.6157	2604	0.6842	nonDE
105038581	XM_010914430	LOC105038581	probable phosphoribosylformylglycinamidine synthase, chloroplastic/mitochondrial	protein_coding	XP_010912732.1	.	675	555	853	872	360	329	1057	662	466762402516672	396530536423652	246707481859914	232262484308299	260076012994265	20331630523228	28606913671263	192803591389194	0.2542	0.5887	6433	0.6979	nonDE
105038584	XM_010914432	LOC105038584	ankyrin repeat protein SKIP35	protein_coding	XP_010912734.1	.	109	131	128	118	138	62	87	64	753734842582478	935954959846818	370205834443951	314300150784166	996958049811347	383149268218887	235458986698191	186396221282604	0.613	0.7008	3802	0.6434	nonDE
105038586	XM_010914433	LOC105038586	transducin beta-like protein 3	protein_coding	XP_010912735.1	.	147	123	315	176	79	68	205	149	101650478770297	878797405047012	91105342070191	468786665576382	570722361848525	420228229659424	554817152564703	433953702673563	0.4433	0.9392	4.3	0.5443	nonDE
105038590	XM_010914440	LOC105038590	diacylglycerol kinase 2	protein_coding	XP_010912742.1	.	25	62	182	310	52	54	379	340	172874963895064	442971049698494	526386420849993	825703785958401	375665352102827	333710652964837	102573512596109	990229925563834	-0.6743	0.5058	4007	0.7344	nonDE
105038593	XM_010914442	LOC105038593	la-related protein 6B	protein_coding	XP_010912744.1	.	76	115	590	482	239	248	452	419	525539890240994	821639850247206	170641751814009	128383620913532	172661575293415	153259707287555	122330416077681	122031276120955	-0.6082	0.758	5224	0.6227	nonDE
105038596	XM_010914446	LOC105038596	uncharacterized LOC105038596	protein_coding	XP_010912748.1	.	195	171	132	137	79	170	93	95	13484247183815	122174273384585	381774766770324	364907802181616	570722361848525	105057057414856	251697537504963	276681890966365	0.4344	0.3615	4151	0.7993	nonDE
105038597	XM_010914447	LOC105038597	FRIGIDA-like protein 3	protein_coding	XP_010912749.1	.	1502	1345	3471	3123	1646	2357	5007	2390	103863278308154	960961390071733	100389410262106	831829975338092	118912532607933	145658520192245	135510706482511	696073388852225	-0.5021	1194	8361	0.4328	nonDE
105038598	XM_019848635	LOC105038598	2-alkenal reductase (NADP(+)-dependent)	protein_coding	XP_019704194.1	.	62	52	67	162	18	0	91	144	428729910459758	371524106198737	193779616466756	431496817178261	130038006497132	0	246284687236039	419391497885859	0.9341	0.3406	2396	0.8078	nonDE
105038601	XM_010914451,XM_010914452,XM_010914453,XM_029262596	LOC105038601	mitochondrial proton/calcium exchanger protein, transcript variant X3	protein_coding	XP_010912753.1		359	331	657	654	203	259	586	619	248248448153312	236489382984196	190019713460684	174196863231224	146653973993988	160057516884987	158596512879471	180280095271769	0.1537	0.459	5863	0.7535	nonDE
105038603	XM_010914455,XM_029262597	LOC105038603	probable V-type proton ATPase subunit H, transcript variant X1	protein_coding	XP_010912757.1		260	175	557	562	147	208	329	374	179789962450866	125032151124575	16109738264475	149692105712458	106197705305991	12854039966053	890413869237987	108925291812022	0.3225	0.799	5341	0.6026	nonDE
105038604	XM_010914459,XM_010914460,XM_029262598	LOC105038604	protein FAR1-RELATED SEQUENCE 6, transcript variant X2	protein_coding	XP_010912761.1		251	233	477	456	209	257	327	292	173566463750644	166471378354434	137959517992004	121458363353881	150988574210559	158821551503635	885001018969063	850432759601881	0.1882	0.3904	5376	0.7828	nonDE
105038605	XM_010914461	LOC105038605	eukaryotic translation initiation factor 2 subunit gamma	protein_coding	XP_010912763.1	.	56	61	127	201	52	71	162	115	387239919124943	435826355348518	367313601362358	535375680573028	375665352102827	438767710379693	438440871782839	334930710117179	-0.06758	0.0962	3706	0.9471	nonDE
105038606	XM_010914463,XM_019847886,XR_002163850,XR_002163851,XR_830759	LOC105038606	protein FAR1-RELATED SEQUENCE 6, transcript variant X3	protein_coding	XP_010912765.1		82	41	60	60	38	44	90	56	567029881575809	292932468349004	173533984895602	159813635991949	274524680382835	271912383897274	243578262101577	163096693622279	-0.2351	0.2983	2976	0.8292	nonDE
105038607	XM_010914464	LOC105038607	60S ribosomal protein L5	protein_coding	XP_010912766.1	.	181	225	372	394	81	107	372	289	125161473860026	160755622874453	107591070635273	104944287634713	585171029237095	661241479022917	100679015001985	841695436729259	0.4164	0.9821	4934	0.5175	nonDE
105038611	XM_010914468	LOC105038611	small G protein signaling modulator 1	protein_coding	XP_010912770.1	.	88	104	251	276	238	159	171	232	608519872910624	743048212397474	725950503479935	735142725562963	171939141923986	982592478174242	462798697992996	67568630214944	-0.3583	0.4436	4616	0.7589	nonDE
105038617	XM_010914475,XM_010914477,XM_019848589,XR_002164040,XR_002164041	LOC105038617	putative RNA-binding protein Luc7-like 2, transcript variant X4	protein_coding	XP_010912777.1		348	310	463	502	216	148	513	376	240641949741929	221485524849247	133910391677773	133710742113264	156045607796559	914614382199923	138839609397899	10950778000353	0.2959	0.6754	5532	0.6522	nonDE
105038623	XM_019848742	LOC105038623	eukaryotic translation initiation factor 2A	protein_coding	XP_019704301.1	.	360	253	711	613	220	245	667	491	248939948008892	180760767054385	205637772101288	163276264771774	158935341274273	151405759215528	180518556468613	143000851015248	0.1024	0.2414	5804	0.8671	nonDE
105038626	XM_029262603,XM_029262604,XM_029262605,XM_029262606,XM_029262607	LOC105038626	eIF-2-alpha kinase GCN2, transcript variant X3	protein_coding	XP_029118436.1		325	199	528	598	160	160	576	500	224737453063583	142179417564517	15270990670813	159280923871975	115589339108562	988772305080998	155890087745009	145622047877034	0.1508	0.2676	5527	0.8506	nonDE
105038627	XM_019848375,XR_003799824	LOC105038627	uncharacterized LOC105038627, transcript variant X2	protein_coding	XP_019703934.1	.	20	39	67	49	27	79	64	46	138299971116051	278643079649053	193779616466756	130514469393425	195057009745698	488206325633743	173211208605566	133972284046872	-0.1984	0.1954	2648	0.8929	nonDE
105038628	XM_010914492,XM_010914493	LOC105038628	transcription factor IIIB 60 kDa subunit, transcript variant X1	protein_coding	XP_010912794.1		158	218	312	398	182	185	274	233	10925697718168	15575433682947	90237672145713	106009711874659	131482873235989	11432679777499	741560486842579	67859874310698	0.1117	0.188	5024	0.896	nonDE
105038632	XM_010914497,XM_010914498	LOC105038632	probable E3 ubiquitin-protein ligase ARI8, transcript variant X1	protein_coding	XP_010912799.1		340	253	455	365	169	212	366	260	235109950897287	180760767054385	131596605212498	97219961895102	122091239433419	131012330423232	99055159921308	757234648960579	0.335	0.729	5324	0.6333	nonDE
105038633	XM_010914501	LOC105038633	inositol transporter 1	protein_coding	XP_010912803.1	.	47	79	850	847	158	68	556	470	32500493212272	564430853648081	245839811935436	225603582808634	114144472369705	420228229659424	150477237476085	136884725004412	-0.09496	0.04193	4989	0.977	nonDE
105038634	XM_010914502,XR_830763	LOC105038634	ATP-dependent (S)-NAD(P)H-hydrate dehydratase, transcript variant X1	protein_coding	XP_010912804.1	.	105	94	131	149	47	70	80	129	726074848359268	671601268897717	378882533688731	396870529380006	339543683631401	432587883472937	216514010756957	375704883522749	0.4699	0.848	3721	0.5845	nonDE
105038638	XM_010914506,XR_003799826,XR_830769	LOC105038638	CMP-sialic acid transporter 5, transcript variant X1	protein_coding	XP_010912808.1	.	45	78	291	271	101	83	241	365	311174935011115	557286159298105	841639826743669	721824922563634	729657703122798	512925633260768	652248457405334	106304094950235	-0.4848	0.5481	4.34	0.7166	nonDE
105038650	XM_010914519	LOC105038650	adenylylsulfatase HINT3	protein_coding	XP_010912821.3	.	133	117	106	53	190	220	39	36	919694807921739	835929238947158	306576706648897	141168711792888	137262340191417	135956191948637	105550580244017	104847874471465	0.4082	0.174	3679	0.906	nonDE
105038658	XM_010914533	LOC105038658	argininosuccinate synthase, chloroplastic	protein_coding	XP_010912835.1	.	155	286	294	403	234	421	533	658	10718247761494	204338258409305	85031652598845	107341492174592	169049408446272	260170712774438	144252459666823	191638615006177	-0.8774	1994	5561	0.1996	nonDE
105038664	XM_010914538,XM_029262611,XM_029262612,XM_029262614,XM_029262615,XM_029262616,XM_029262617,XM_029262618,XM_029262619	LOC105038664	cyclin-dependent kinase G-2, transcript variant X5	protein_coding	XP_010912840.1		677	1045	1957	2291	1868	1965	3266	3671	468145402227833	746620559572462	566010014067822	610221733429257	134950553409246	12143359871776	883918448915278	106915707551319	-1192	3029	8003	0.09956	nonDE
105038666	XM_010914542	LOC105038666	inactive LRR receptor-like serine/threonine-protein kinase BIR2	protein_coding	XP_010912844.2	.	66	48	70	62	42	64	83	97	456389904682968	342945328798834	202456315711536	16514075719168	303422015159975	395508922032399	224633286160343	282506772881447	-0.4811	0.858	3168	0.5794	nonDE
105038678	XM_010914556	LOC105038678	F-box protein SKIP14	protein_coding	XP_010912858.1	.	60	60	84	47	57	67	71	65	414899913348153	428681660998542	242947578853843	125187348193693	411787020574252	414048402752668	1921561845468	189308662240145	-0.2353	0.2535	3137	0.8622	nonDE
105038680	XM_010914557,XM_010914558	LOC105038680	glucose-6-phosphate 1-dehydrogenase, cytoplasmic isoform, transcript variant X2	protein_coding	XP_010912859.1		141	113	708	777	191	223	561	916	97501479636816	807350461547255	20477010217681	206958658609573	137984773560846	137810140020664	151830450043316	266779591710727	-0.4594	0.4561	5571	0.7539	nonDE
105038681	XM_010914559,XM_010914560	LOC105038681	AUGMIN subunit 6, transcript variant X1	protein_coding	XP_010912861.1		365	273	485	474	266	358	755	579	252397447286793	195050155754337	140273304457278	126252772433639	192167276267984	221237803261873	204335097651878	168630331441606	-0.416	1357	5859	0.3738	nonDE
105038693	XM_019848435	LOC105038693	auxin response factor 7	protein_coding	XP_019703994.1	.	441	385	564	632	487	398	839	781	304951436310892	275070732474065	163121945801866	168337029911519	351825050911686	245957110888898	227069068781359	227461638783928	-0.4582	1.32	6235	0.3894	nonDE
105038721	XM_019847934	LOC105038721	protein transport protein Sec61 subunit alpha	protein_coding	XP_019703493.1	.	149	156	693	763	187	187	584	420	103033478481458	111457231859621	20043175255442	203229673769761	135095040083132	115562763156342	158055227852579	122322520216709	-0.008889	0.008497	5463	0.9962	nonDE
105038724	XM_010914588	LOC105038724	cytochrome P450 71A9	protein_coding	XP_010912890.1	.	271	218	426	564	402	663	572	301	187396460862249	15575433682947	123209129275877	150224817832432	290418214510262	409722523917939	154807517691224	876644728219747	-0.5629	0.6737	5791	0.6537	nonDE
105038726	XM_010914589	LOC105038726	26S proteasome non-ATPase regulatory subunit 6	protein_coding	XP_010912891.1	.	128	183	645	541	131	259	467	439	885119815142727	130747906604555	186549033762772	14409862845274	946387713951352	160057516884987	126390053779374	127856158036036	-0.09176	0.1068	5352	0.9413	nonDE
105038727	XM_010914590	LOC105038727	telomere length regulation protein TEL2 homolog	protein_coding	XP_010912892.1	.	169	143	203	260	103	127	218	146	116863475593063	102169129204653	587123315563453	692525755965111	744106370511368	784838017158042	590000679312709	42521637980094	0.2259	0.4369	4511	0.7625	nonDE
105038728	XM_010914591,XM_029262625	LOC105038728	anaphase-promoting complex subunit 2, transcript variant X1	protein_coding	XP_010912893.1		134	83	133	95	54	31	116	128	926609806477542	593009631047984	384666999851918	253038256987252	390114019491397	191574634109443	313945315597588	372792442565208	0.2654	0.3018	3.61	0.8285	nonDE
105038730	XM_010914595,XM_029262626	LOC105038730	cystinosin homolog, transcript variant X2	protein_coding	XP_010912897.1		52	59	67	120	16	48	83	80	359579924901733	421536966648567	193779616466756	319627271983897	115589339108562	296631691524299	224633286160343	232995276603255	0.1423	0.1667	3016	0.9086	nonDE
105038734	XM_010914603	LOC105038734	very-long-chain 3-oxoacyl-CoA reductase 1	protein_coding	XP_010912905.2	.	103	69	95	67	54	159	120	122	712244851247663	492983910148324	27476214275137	178458560191009	390114019491397	982592478174242	324771016135436	355317796819964	-0.6787	0.812	3696	0.5997	nonDE
105038739	XM_010914611	LOC105038739	protein RETICULATA-RELATED 1, chloroplastic	protein_coding	XP_010912913.1	.	220	216	280	270	136	99	286	155	152129968227656	154325397959475	809825262846143	719161361963769	982509382422777	611802863768868	774037588456122	451428348418807	0.4414	0.8312	4762	0.5893	nonDE
105038740	XM_010914612,XM_029262630	LOC105038740	protein IN CHLOROPLAST ATPASE BIOGENESIS, chloroplastic, transcript variant X2	protein_coding	XP_010912914.1		840	662	106	75	179	241	19	31	580859878687414	472978765968392	306576706648897	199767044989936	129315573127704	148933828452825	514220775547774	902856696837613	2555	0.9288	4237	0.5494	nonDE
105038742	XM_010914613,XM_019848653,XM_029262631,XM_029262632	LOC105038742	ultraviolet-B receptor UVR8, transcript variant X4	protein_coding	XP_010912915.1		221	407	372	236	139	145	273	395	152821468083236	290789060044011	107591070635273	628600301568331	100418238350563	896074901479655	738854061708117	115041417822857	0.2198	0.246	5136	0.8645	nonDE
105038743	XM_010914616	LOC105038743	pentatricopeptide repeat-containing protein At5g50280, chloroplastic	protein_coding	XP_010912918.2	.	259	245	102	134	102	90	101	43	179098462595286	175045011574405	295007774322523	356917120382018	736882036817083	556184421608061	273348938580659	12523496117425	1133	0.8268	4021	0.5914	nonDE
105038744	XM_010914619	LOC105038744	mitochondrial inner membrane protease atp23	protein_coding	XP_010912921.1	.	18	26	85	113	24	10	67	58	124469974004446	185762053099368	245839811935436	300982347784836	173384008662843	0.617982690675624	181330484008952	16892157553736	0.5158	0.4686	2413	0.7519	nonDE
105038745	XM_010914620,XR_830781	LOC105038745	actin-related protein 3, transcript variant X1	protein_coding	XP_010912922.1	.	43	67	334	374	123	122	291	300	29734493789951	478694521448372	966005849252184	996171664349813	888593044397071	753938882624261	787569714128432	873732287262207	-0.5254	0.5566	4491	0.7122	nonDE
105038750	XM_010914626,XM_010914627	LOC105038750	alpha/beta hydrolase domain-containing protein 17B, transcript variant X1	protein_coding	XP_010912928.1		131	215	127	145	113	148	136	146	905864810810134	153610928524478	367313601362358	386216286980542	816349707454219	914614382199923	368073818286827	42521637980094	-0.03722	0.02935	4308	0.9863	nonDE
105038752	XM_029262633,XM_029262634,XM_029262635	LOC105038752	regulator of nonsense transcripts UPF2, transcript variant X3	protein_coding	XP_029118466.1		240	246	220	299	150	95	290	183	165959965339261	175759481009402	636291277950541	796404619359877	108365005414277	587083556141843	78486328899397	532976695229946	0.3641	0.5377	4818	0.7223	nonDE
105038755	XM_010914637,XM_029262637,XM_029262638,XM_029262639,XR_003799831,XR_003799832,XR_003799833	LOC105038755	E3 ubiquitin-protein ligase RGLG1, transcript variant X2	protein_coding	XP_010912939.1		105	100	23	102	163	245	222	156	726074848359268	714469434997571	665213608766474	271683181186313	117756639216848	151405759215528	600826379850557	454340789376347	-2.04	1809	4019	0.2351	nonDE
105038757	XM_010914638,XM_010914639,XM_019848490,XM_019848491,XM_019848492,XM_029262642,XM_029262643,XM_029262644,XM_029262645	LOC105038757	serine/threonine-protein kinase AFC1, transcript variant X5	protein_coding	XP_010912940.1		261	255	488	404	243	238	486	348	180481462306447	182189705924381	141140974381756	107607848234579	175551308771129	147079880380798	131532261534852	101352945322416	-0.0679	0.1413	5498	0.9222	nonDE
105038758	XM_010914642,XM_010914643	LOC105038758	dolichol-phosphate mannosyltransferase subunit 1, transcript variant X2	protein_coding	XP_010912944.1		23	32	73	140	84	56	63	64	159044966783459	228630219199223	211133014956316	372898483981213	606844030319951	346070306778349	170504783471104	186396221282604	0.1801	0.1636	3038	0.909	nonDE
105038759	XM_010914644,XM_010914645,XM_010914646,XM_019847915	LOC105038759	probable U3 small nucleolar RNA-associated protein 11, transcript variant X2	protein_coding	XP_010912946.1		62	38	223	164	51	23	129	154	428729910459758	271498385299077	644967977195321	436823938377993	368441018408541	142136018855393	349128842345594	448515907461266	0.1713	0.1529	3512	0.9147	nonDE
105038764	XM_010914651	LOC105038764	cytochrome b5	protein_coding	XP_010912953.1	.	99	94	415	515	94	106	237	367	684584857024453	671601268897717	120027672886125	137173370893089	679087367262802	655061652116161	641422756867486	106886583141743	0.1706	0.1691	4723	0.9082	nonDE
105038766	XM_019848773	LOC105038766	probable serine/threonine-protein kinase WNK3	protein_coding	XP_019704332.1	.	47	58	127	187	66	90	143	128	32500493212272	414392272298591	367313601362358	498085832174906	476806023822818	556184421608061	387018794228061	372792442565208	-0.2637	0.4563	3735	0.7539	nonDE
105038771	XM_010914660,XR_830786	LOC105038771	probable tRNA pseudouridine synthase 1, transcript variant X2	protein_coding	XP_010912962.1	.	49	91	62	60	30	46	94	43	338834929234325	650167185847789	179318451058789	159813635991949	216730010828554	284272037710787	254403962639425	12523496117425	-0.03349	0.02851	2959	0.9868	nonDE
105038773	XM_010914662,XM_010914663,XM_010914664,XM_010914666,XR_830789	LOC105038773	probable ribosome biogenesis protein RLP24, transcript variant X4	protein_coding	XP_010912964.1		48	37	84	84	10	48	56	64	331919930678522	264353690949101	242947578853843	223739090388728	0.722433369428513	296631691524299	15155980752987	186396221282604	0.4253	0.5984	2703	0.6938	nonDE
105038774	XM_010914667	LOC105038774	probable E3 ubiquitin-protein ligase XERICO	protein_coding	XP_010912969.1	.	16	18	194	240	13	21	85	111	110639976892841	128604498299563	561093217829113	639254543967794	0.939163380257066	129776365041881	230046136429267	323280946287016	0.7449	0.4837	2792	0.7431	nonDE
105038775	XM_010914668,XM_010914669	LOC105038775	beta-1,4-mannosyl-glycoprotein 4-beta-N-acetylglucosaminyltransferase, transcript variant X1	protein_coding	XP_010912970.1		172	201	560	582	200	335	1024	802	118937975159804	143608356434512	161965052569229	15501922691219	144486673885703	207024201376334	277137933768905	233577764794763	-0.747	1536	5782	0.3162	nonDE
105038780	XM_010914674	LOC105038780	serine/threonine-protein kinase STY13	protein_coding	XP_010912976.1	.	64	39	222	205	34	47	195	209	442559907571363	278643079649053	642075744113727	546029922972491	245627345605694	290451864617543	527752901220084	608700160126004	-0.08855	0.07356	3745	0.9596	nonDE
105038783	XM_010914684	LOC105038783	protein NBR1 homolog	protein_coding	XP_010912986.1	.	506	498	838	685	289	427	992	600	349898926923609	35580577862879	242369132237524	182453901090808	20878324376484	263878608918491	268477373338627	174746457452441	0.05435	0.1005	6294	0.9457	nonDE
105038785	XM_010914686	LOC105038785	plant intracellular Ras-group-related LRR protein 3	protein_coding	XP_010912988.1	.	34	27	199	205	37	17	230	135	235109950897287	192906747449344	57555438323708	546029922972491	26730034668855	105057057414856	622477780926252	393179529267993	-0.07519	0.04434	3334	0.9765	nonDE
105038786	XM_010914689	LOC105038786	CRM-domain containing factor CFM3, chloroplastic/mitochondrial	protein_coding	XP_010912991.2	.	152	188	67	83	95	77	90	61	105107978048199	134320253779543	193779616466756	221075529788862	686311700957087	47584667182023	243578262101577	177658898409982	0.4418	0.2839	3717	0.8378	nonDE
105038789	XM_010914690,XM_010914691	LOC105038789	general negative regulator of transcription subunit 3, transcript variant X1	protein_coding	XP_010912992.1		348	339	729	939	247	389	773	611	240641949741929	242205138464176	210843791648156	2501083403274	178441042248843	240395266672818	20920666289391	177950142505736	0.02312	0.0457	6102	0.9755	nonDE
105038790	XM_010914693,XM_029262649,XR_002163697	LOC105038790	SWI/SNF complex subunit SWI3A, transcript variant X3	protein_coding	XP_010912995.1		64	26	111	103	23	18	92	77	442559907571363	185762053099368	321037872056864	274346741786178	166159674968558	111236884321612	248991112370501	224257953730633	0.2742	0.3345	2872	0.8128	nonDE
105038792	XM_010914695	LOC105038792	photosynthetic NDH subunit of lumenal location 5, chloroplastic	protein_coding	XP_010912997.1	.	444	260	97	110	138	193	62	79	307025935877633	185762053099368	280546608914557	292991665985239	996958049811347	119270659300395	167798358336642	230082835645714	0.6814	0.3296	4297	0.8151	nonDE
105038797	XM_010914699	LOC105038797	probable metal-nicotianamine transporter YSL6	protein_coding	XP_010913001.1	.	25	37	86	186	28	12	69	71	172874963895064	264353690949101	248732045017029	495422271575041	202281343439984	0.741579228810749	186743334277876	206783307985389	0.6702	0.5872	2725	0.6981	nonDE
105038799	XM_010914702	LOC105038799	uncharacterized LOC105038799	protein_coding	XP_010913004.1	.	29	41	49	81	34	25	51	77	200534958118274	292932468349004	141719420998075	215748408589131	245627345605694	154495672668906	13802768185756	224257953730633	-0.03482	0.03271	2643	0.9833	nonDE
105038801	XM_010914704	LOC105038801	probable U3 small nucleolar RNA-associated protein 7	protein_coding	XP_010913006.2	.	42	32	48	48	29	45	56	60	290429939343707	228630219199223	138827187916482	127850908793559	209505677134269	278092210804031	15155980752987	174746457452441	-0.3331	0.4693	2616	0.7512	nonDE
105038802	XM_010914705	LOC105038802	acetolactate synthase 1, chloroplastic	protein_coding	XP_010913007.1	.	173	208	248	205	65	85	129	110	119629475015384	148609642479495	717273804235155	546029922972491	469581690128533	52528528707428	349128842345594	320368505329476	0.9541	2024	4276	0.1972	nonDE
105038803	XM_019847964	LOC105038803	U6 snRNA-associated Sm-like protein LSm6	protein_coding	XP_019703523.1	.	58	60	203	209	60	26	126	91	401069916236548	428681660998542	587123315563453	556684165371954	433460021657108	160675499575662	341009566942208	265032127136203	0.5657	0.8615	3.56	0.5781	nonDE
105038805	XM_010914709	LOC105038805	uncharacterized LOC105038805	protein_coding	XP_010913011.1	.	196	224	464	602	289	206	864	636	13553397169373	160041153439456	134199614985932	160346348111922	20878324376484	127304434279179	233835131617514	185231244899588	-0.536	1.21	5704	0.4281	nonDE
105038807	XM_010914710	LOC105038807	protein NUCLEAR FUSION DEFECTIVE 4	protein_coding	XP_010913012.2	.	25	21	162	181	0	0	337	158	172874963895064	15003858134949	468541759218125	482104468575712	0	0	912065270313683	460165671291429	1298	0.2847	1853	0.8378	nonDE
105038811	XM_010914717	LOC105038811	gamma carbonic anhydrase-like 2, mitochondrial	protein_coding	XP_010913019.3	.	92	84	75	89	26	30	114	75	636179867133835	600154325397959	216917481119502	237056893388057	187832676051413	185394807202687	308532465328664	218433071815552	0.1455	0.1455	3195	0.9206	nonDE
105038819	XM_010914725	LOC105038819	sphingosine-1-phosphate lyase	protein_coding	XP_010913027.1	.	86	48	371	374	61	37	314	459	594689875799019	342945328798834	107301847327114	996171664349813	440684355351393	228653595549981	849817492221057	133681039951118	-0.01438	0.007558	4325	0.9963	nonDE
105038832	XM_010914739,XM_029262656,XM_029262657	LOC105038832	violaxanthin de-epoxidase, chloroplastic, transcript variant X1	protein_coding	XP_010913041.1		503	603	40	45	190	173	9	30	347824427356868	430825069303535	115689323263735	119860226993961	137262340191417	106911005486883	243578262101577	873732287262207	2533	0.7993	3677	0.6026	nonDE
105038835	XM_010914744,XM_010914745	LOC105038835	O-fucosyltransferase 1, transcript variant X1	protein_coding	XP_010913046.1		37	46	140	136	44	39	64	72	255854946564694	328655940098883	404912631423071	36224424158175	317870682548546	241013249363493	173211208605566	20969574894293	0.6419	1.15	3142	0.4483	nonDE
105038836	XM_010914746,XM_010914747,XM_010914748	LOC105038836	TBC1 domain family member 13, transcript variant X3	protein_coding	XP_010913048.1		42	74	152	163	42	56	75	83	290429939343707	528707381898202	439619428402192	434160377778127	303422015159975	346070306778349	202981885084648	241732599475877	0.5988	1073	3407	0.4802	nonDE
105038841	XM_010914753	LOC105038841	small ubiquitin-related modifier 2	protein_coding	XP_010913055.1	.	34	39	88	114	38	0	59	56	235109950897287	278643079649053	254516511180216	303645908384702	274524680382835	0	159679082933256	163096693622279	1369	0.6786	2109	0.6507	nonDE
105038842	XM_010914754	LOC105038842	ER lumen protein-retaining receptor	protein_coding	XP_010913056.1	.	41	30	129	170	40	59	119	127	283514940787905	214340830499271	373098067525544	452805301977188	288973347771405	364609787498618	322064591000974	369880001607667	-0.07489	0.08318	3379	0.9551	nonDE
105038843	XM_010914756,XM_010914757	LOC105038843	eukaryotic translation initiation factor 3 subunit H, transcript variant X2	protein_coding	XP_010913058.1		295	349	573	442	164	209	442	527	203992457396175	249349832814152	1657249555753	117729378514069	118479072586276	129158382351205	119623990943219	153485638462394	0.2111	0.4832	5585	0.7431	nonDE
105038844	XM_010914758	LOC105038844	photosystem I reaction center subunit XI, chloroplastic	protein_coding	XP_010913060.1	.	916	699	11	10	669	919	1	0	633413867711514	499414135063302	31814563897527	266356059986581	483307924147675	567926092730898	0.270642513446197	0	3864	0.4351	2774	0.7632	nonDE
105038855	XM_010914766,XM_019847975,XR_003799848,XR_003799849,XR_003799850	LOC105038855	FHA domain-containing protein FHA2, transcript variant X3	protein_coding	XP_010913068.1		45	63	136	80	43	63	201	85	311174935011115	45011574404847	393343699096698	213084847989265	31064634885426	389329095125643	543991452026855	247557481390959	-0.3991	0.5424	3449	0.72	nonDE
105038864	XM_010914782,XM_029262665	LOC105038864	galacturonosyltransferase 8, transcript variant X2	protein_coding	XP_010913084.1		117	164	318	364	118	103	267	304	809054831028899	117172987339602	91973011994669	969536058351155	852471375925645	636522171395893	722615510901345	885382051092369	0.1107	0.2007	4766	0.89	nonDE
105038866	XM_010914784	LOC105038866	ras GTPase-activating protein-binding protein 1	protein_coding	XP_010913086.1	.	167	163	762	872	212	208	795	534	115480475881903	116458517904604	220388160817415	232262484308299	153155874318845	12854039966053	215160798189726	155524347132673	-0.163	0.1672	5673	0.9085	nonDE
105038874	XM_010914791	LOC105038874	serine hydroxymethyltransferase 4	protein_coding	XP_010913093.1	.	174	215	765	813	238	107	712	1137	120320974870964	153610928524478	221255830741893	21654747676909	171939141923986	661241479022917	192697469573692	331144536872376	-0.1574	0.1133	5736	0.9387	nonDE
105038875	XM_010914793	LOC105038875	adenosylhomocysteinase	protein_coding	XP_010913095.1	.	509	648	3848	3702	489	700	3395	4628	35197342649035	462976193878426	111293128979713	986050134070323	353269917650543	432587883472937	918831333149838	134787767514983	-0.2244	0.1418	7695	0.9222	nonDE
105038878	XM_010914794,XM_029262668,XM_029262669,XR_003799858	LOC105038878	heat stress transcription factor A-5, transcript variant X2	protein_coding	XP_010913096.3		66	41	85	94	36	85	84	59	456389904682968	292932468349004	245839811935436	250374696387386	260076012994265	52528528707428	227339711294805	171834016494901	0.1192	0.1487	3185	0.9188	nonDE
105038885	XM_010914805,XR_830802,XR_830803	LOC105038885	probable UDP-N-acetylglucosamine--peptide N-acetylglucosaminyltransferase SEC, transcript variant X2	protein_coding	XP_010913107.1	.	193	126	354	357	159	177	383	289	133459472126989	900231488096939	102385051088405	950891134152094	114866905739134	109382936249585	103656082649893	841695436729259	-0.1658	0.4088	5031	0.7744	nonDE
105038904	XM_010914819,XM_010914820,XM_010914821,XR_830804	LOC105038904	probable sodium/metabolite cotransporter BASS3, chloroplastic, transcript variant X4	protein_coding	XP_010913121.1		339	219	52	50	95	76	72	21	234418451041706	156468806264468	150396120242855	13317802999329	686311700957087	469666844913474	194862609681262	611612601083545	1321	0.5727	3521	0.7063	nonDE
105038912	XM_010914831,XM_010914832,XM_029262709	LOC105038912	uncharacterized LOC105038912, transcript variant X1	protein_coding	XP_010913133.1		0	33	112	132	133	6	64	192	0	235774913549198	323930105138457	351589999182287	960836381339922	0.370789614405374	173211208605566	559188663847812	-0.8395	0.2101	2307	0.8849	nonDE
105038919	XM_010914839	LOC105038919	zinc finger A20 and AN1 domain-containing stress-associated protein 8	protein_coding	XP_010913141.1	.	120	110	219	245	71	58	235	246	829799826696306	785916378497328	633399044868947	652572346967123	512927692294244	358429960591862	636009906598562	716460475555009	0.1441	0.2273	4305	0.8756	nonDE
105038922	XM_010914847,XM_019848619	LOC105038922	serine/threonine-protein kinase Nek6, transcript variant X2	protein_coding	XP_010913149.1		0	12	44	58	67	5	55	61	0	0.857363321997085	127258255590108	154486514792217	484030357517103	0.308991345337812	148853382395408	177658898409982	-1246	0.4183	1429	0.7715	nonDE
105038925	XM_010914851,XM_010914852,XM_010914853,XM_010914855,XM_029262708,XR_003799869,XR_003799870,XR_830809,XR_830810,XR_830811	LOC105038925	E3 ubiquitin-protein ligase makorin, transcript variant X3	protein_coding	XP_010913153.1		196	177	347	230	131	140	386	209	13553397169373	12646108999457	10036048793129	612618937969136	946387713951352	865175766945873	104468010190232	608700160126004	0.0157	0.02216	4878	0.9899	nonDE
105038927	XM_019848423,XM_029262706,XM_029262707	LOC105038927	carboxyl-terminal-processing peptidase 3, chloroplastic, transcript variant X2	protein_coding	XP_019703982.1		1178	1206	186	207	195	585	324	230	814586829873541	86165013860707	537955353176366	551357044172223	14087450703856	36151987404524	876881743565677	669861420234358	0.4765	0.1932	5.73	0.8943	nonDE
105038931	XM_010914865	LOC105038931	protein FAR1-RELATED SEQUENCE 6	protein_coding	XP_010913167.1	.	126	194	312	283	124	80	308	314	871289818031121	138607070389529	90237672145713	753787649762024	895817378091356	494386152540499	833578941414286	914506460667776	0.06258	0.0877	4756	0.953	nonDE
105038936	XM_010914867,XM_029262704	LOC105038936	ADP,ATP carrier protein 1, mitochondrial, transcript variant X1	protein_coding	XP_010913169.1		0	10	214	228	32	0	297	449	0	0.714469434997571	61893787946098	607291816769405	231178678217124	0	803808264935204	130768598993577	-1443	0.2892	2024	0.8353	nonDE
105038938	XM_010914869,XM_019848696	LOC105038938	threonine--tRNA ligase, chloroplastic/mitochondrial 2, transcript variant X2	protein_coding	XP_010913171.1		929	935	139	103	512	669	162	156	642403365834057	668028921722729	402020398341478	274346741786178	369885885147398	413430420061992	438440871782839	454340789376347	-0.06695	0.0191	5467	0.991	nonDE
105038942	XM_010914874	LOC105038942	E3 ubiquitin-protein ligase UPL5	protein_coding	XP_010913176.2	.	65	99	144	169	72	8	126	128	449474906127166	707324740647595	416481563749445	450141741377322	520152025988529	0.494386152540499	341009566942208	372792442565208	0.4263	0.4518	3459	0.7565	nonDE
105038950	XM_010914887,XR_002163790,XR_830814,XR_830815	LOC105038950	U4/U6.U5 tri-snRNP-associated protein 2, transcript variant X2	protein_coding	XP_010913189.1	.	531	541	715	569	323	263	453	418	367186423313115	386527964333686	206794665333926	151556598132365	23334597832541	162529447647689	122601058591127	121740032025201	0.5527	1118	5982	0.4622	nonDE
105038953	XM_010914890,XM_010914891	LOC105038953	fimbrin-4, transcript variant X2	protein_coding	XP_010913192.1		180	213	344	403	135	115	516	391	124469974004446	152181989654483	994928180068118	107341492174592	975285048728492	710680094276967	139651536938237	113876441439841	-0.05158	0.07586	5131	0.9586	nonDE
105038957	XM_019848625	LOC105038957	serine/threonine-protein phosphatase 7 long form homolog	protein_coding	XP_019704184.1	.	70	30	88	114	75	77	190	134	484049898906179	214340830499271	254516511180216	303645908384702	541825027071384	47584667182023	514220775547774	390267088310452	-0.8267	1995	3588	0.1996	nonDE
105038960	XM_010914903,XM_010914904	LOC105038960	uncharacterized LOC105038960, transcript variant X2	protein_coding	XP_010913205.1		186	147	319	261	117	201	432	326	128618973137927	105027006944643	922622353028284	695189316564976	84524704223136	1242145208258	116917565808757	949455752158264	-0.3506	0.9604	4988	0.5313	nonDE
105038961	XM_010914906	LOC105038961	uncharacterized LOC105038961	protein_coding	XP_010913208.1	.	35	21	53	110	27	0	64	82	242024949453089	15003858134949	153288353324448	292991665985239	195057009745698	0	173211208605566	238820158518336	0.8266	0.3178	1929	0.8205	nonDE
105038962	XM_010914907	LOC105038962	putative BPI/LBP family protein At1g04970	protein_coding	XP_010913209.1	.	90	89	150	134	111	150	125	118	62234987002223	635877797147838	433834962239005	356917120382018	801901040065649	926974036013436	338303141807746	343668032989801	-0.254	0.3151	4044	0.823	nonDE
105038964	XM_010914913	LOC105038964	uncharacterized protein At1g03900	protein_coding	XP_010913215.1	.	25	60	70	144	37	28	115	80	172874963895064	428681660998542	202456315711536	383552726380677	26730034668855	173035153389175	311238890463126	232995276603255	-0.06139	0.05673	3.04	0.9702	nonDE
105038968	XM_010914916	LOC105038968	65-kDa microtubule-associated protein 1	protein_coding	XP_010913218.1	.	14	79	524	323	63	111	96	174	0.968099797812357	564430853648081	151553013475492	860330073756656	455133022739963	685960786649942	259816812908349	50676472661208	0.2405	0.1075	3943	0.9408	nonDE
105038974	XM_010914921	LOC105038974	heat shock protein 81-1	protein_coding	XP_010913223.1	.	1074	1317	1598	1250	319	490	1293	1479	742670844893194	940956245891801	46217884643862	332945074983226	230456244847696	302811518431056	349940769885932	430750017620268	0.6807	1273	7082	0.4082	nonDE
105038975	XM_010914922	LOC105038975	heat shock protein 81-1-like	protein_coding	XP_010913224.1	.	1007	1028	1340	1108	301	560	1097	1350	696340354569317	734474579177503	387559232933511	295122514465132	217452444197982	346070306778349	296894837250478	393179529267993	0.5081	0.9614	6.94	0.5306	nonDE
105038980	XM_010914926,XM_010914927,XM_029262695	LOC105038980	MLO-like protein 13, transcript variant X1	protein_coding	XP_010913228.1		227	169	0	0	158	255	0	0	156970467216718	120745334514589	0	0	114144472369705	157585586122284	0	0	0.08091	0.008427	0.4636	0.9962	nonDE
105038981	XM_010914934	LOC105038981	ketol-acid reductoisomerase, chloroplastic	protein_coding	XP_010913236.1	.	1679	1398	8543	7149	1514	2286	10716	6468	116102825751925	998828270126604	247083472160521	190417947284407	109376412131477	141270843088448	290020517408944	188376681133732	-0.3801	0.3574	8996	0.8017	nonDE
105038985	XM_010914938	LOC105038985	probable protein phosphatase 2C 66	protein_coding	XP_010913240.1	.	129	126	235	331	211	162	455	342	892034813698529	900231488096939	679674774174441	881638558555583	152433440949416	100113195889451	123142343618019	996054807478915	-0.6854	2054	4968	0.1932	nonDE
105038986	XM_010914939	LOC105038986	pre-mRNA-splicing factor CWC25 homolog	protein_coding	XP_010913241.1	.	21	25	89	48	48	30	55	64	145214969671854	178617358749393	25740874426181	127850908793559	346768017325686	185394807202687	148853382395408	186396221282604	-0.1139	0.1072	2586	0.9409	nonDE
105038988	XM_010914941	LOC105038988	peroxisome biogenesis protein 5	protein_coding	XP_010913243.1	.	563	718	1176	1461	573	898	1174	900	389314418691684	512989054328256	34012661039538	389146203640395	413954320682538	55494845622671	317734310785835	262119686178662	-0.1174	0.2048	6937	0.8867	nonDE
105038989	XM_010914945	LOC105038989	SCY1-like protein 2	protein_coding	XP_010913247.1	.	180	132	295	329	200	145	425	340	124469974004446	943099654196793	853208759070043	876311437355851	144486673885703	896074901479655	115023068214634	990229925563834	-0.3947	1132	5033	0.4548	nonDE
105038993	XM_010914947,XM_010914948,XM_010914949,XM_010914950,XM_029262689	LOC105038993	probable WRKY transcription factor 2, transcript variant X1	protein_coding	XP_010913249.1		228	295	461	417	190	341	595	636	157661967072298	210768483324283	133331945061454	111070477014404	137262340191417	210732097520388	161032295500487	185231244899588	-0.4382	1237	5661	0.423	nonDE
105038994	XM_010914951,XM_029262688,XR_830824,XR_830825	LOC105038994	chloride channel protein CLC-f, transcript variant X1	protein_coding	XP_010913253.1		137	150	362	358	119	128	305	289	94735480214495	107170415249636	10469883755368	95355469475196	85969570961993	791017844064798	8254596660109	841695436729259	0.073	0.1596	4854	0.9107	nonDE
105038998	XM_010914955,XM_010914957	LOC105038998	uncharacterized LOC105038998, transcript variant X1	protein_coding	XP_010913257.1		335	275	206	179	217	222	337	291	231652451619385	196479094624332	595800014808233	47677734737598	156768041165987	137192157329988	912065270313683	84752031864434	-0.3647	0.3643	5124	0.7969	nonDE
105039005	XM_010914967,XM_019848654,XM_019848655	LOC105039005	ubiquitin-conjugating enzyme E2-17 kDa, transcript variant X3	protein_coding	XP_010913269.1		242	276	589	605	103	371	657	448	167342965050422	19719356405933	170352528505849	161145416291881	744106370511368	229271578240656	177812131334151	130477354897823	0.06116	0.06943	5631	0.9603	nonDE
105039006	XM_010914968	LOC105039006	uncharacterized WD repeat-containing protein C2A9.03	protein_coding	XP_010913270.1	.	484	512	1170	1042	407	557	1105	835	334685930100843	365808350718756	338391270546424	277543014506017	294030381357405	344216358706322	299059977358047	243188819954647	-0.05542	0.1372	6615	0.9244	nonDE
105039009	XM_010914971,XM_029262683	LOC105039009	ubiquitin-conjugating enzyme E2-17 kDa, transcript variant X1	protein_coding	XP_010913273.1		315	253	480	558	117	294	330	292	21782245450778	180760767054385	138827187916482	148626681472512	84524704223136	181686911058633	893120294372449	850432759601881	0.5	1139	5391	0.4538	nonDE
105039012	XM_010914977,XR_002164005,XR_002164006	LOC105039012	proteasome activator subunit 4, transcript variant X3	protein_coding	XP_010913279.1	.	85	64	373	411	114	175	618	455	587774877243217	457260438398445	107880293943433	109472340654485	823574041148504	108146970868234	16725707330975	132516063568101	-0.8174	1058	4903	0.4885	nonDE
105039014	XM_010914982,XM_010914984,XM_010914986,XM_010914988,XM_029262679,XM_029262680	LOC105039014	KH domain-containing protein At5g56140, transcript variant X3	protein_coding	XP_010913284.1		45	59	130	156	55	90	80	74	311174935011115	421536966648567	375990300607138	415515453579066	397338353185682	556184421608061	216514010756957	215520630858011	0.3502	0.5028	3467	0.7354	nonDE
105039015	NM_001303591	IAA1	auxin-responsive protein IAA1	protein_coding	NP_001290520.1	.	59	41	477	176	116	179	187	243	40798491479235	292932468349004	137959517992004	468786665576382	838022708537075	110618901630937	506101500144388	707723152682387	-0.5666	0.5225	4329	0.7285	nonDE
105039024	XM_010914996	LOC105039024	uncharacterized LOC105039024	protein_coding	XP_010913298.1	.	16	8	76	74	6	0	63	77	110639976892841	0.571575547998057	219809714201096	19710348439007	0.433460021657108	0	170504783471104	224257953730633	0.8701	0.2837	1343	0.8378	nonDE
105039046	XM_010915019	LOC105039046	CCR4-NOT transcription complex subunit 10	protein_coding	XP_010913321.1	.	88	77	119	166	91	41	148	112	608519872910624	550141464948129	344175736709611	442151059577724	657414366179946	253372903177006	400550919900371	326193387244557	0.1245	0.1783	3764	0.9013	nonDE
105039049	XM_010915026,XM_019847068,XM_019847077	LOC105039049	PX domain-containing protein EREL1, transcript variant X2	protein_coding	XP_010913328.1		29	55	101	111	58	31	71	46	200534958118274	392958189248664	29211554124093	295655226585105	419011354268537	191574634109443	1921561845468	133972284046872	0.5734	0.9383	2982	0.5444	nonDE
105039050	XM_010915027	LOC105039050	uncharacterized LOC105039050	protein_coding	XP_010913329.1	.	96	80	159	121	39	43	105	83	663839861357045	571575547998057	459865059973345	322290832583763	28174901407712	265732556990518	284174639118506	241732599475877	0.5969	1447	3523	0.3356	nonDE
105039053	XM_010915029,XM_010915030,XM_019848459	LOC105039053	probable sucrose-phosphate synthase 1, transcript variant X2	protein_coding	XP_010913331.1		76	77	888	833	99	124	485	428	525539890240994	550141464948129	256830297645491	221874597968822	715209035734228	766298536437774	131261619021405	124652472982741	0.08765	0.04635	5058	0.9755	nonDE
105039055	XM_010915033,XR_003799871	LOC105039055	synaptotagmin-5, transcript variant X1	protein_coding	XP_010913335.1	.	99	96	71	115	74	97	86	56	684584857024453	685890657597668	205348548793129	306309468984568	534600693377099	599443209955355	232752561563729	163096693622279	0.3081	0.2786	3561	0.841	nonDE
105039056	XM_010915034,XM_010915035,XM_019848402,XM_029262716	LOC105039056	phosphoenolpyruvate phosphatase, transcript variant X4	protein_coding	XP_010913336.1		74	43	239	257	48	36	219	170	511709893129389	307221857048955	691243706500814	684535074165513	346768017325686	222473768643225	592707104447171	495114962781917	0.1397	0.1168	3.84	0.9364	nonDE
105039059	XM_010915038	LOC105039059	ER membrane protein complex subunit 7 homolog	protein_coding	XP_010913340.1	.	26	57	110	105	31	21	74	81	179789962450866	407247577948615	31814563897527	27967386298591	223954344522839	129776365041881	200275459950186	235907717560796	0.3316	0.4536	2903	0.7555	nonDE
105039060	XM_010915042	LOC105039060	uncharacterized LOC105039060	protein_coding	XP_010913344.1	.	236	245	937	843	285	288	905	857	16319396591694	175045011574405	271002239745298	224538158568688	205893510287126	17797901491458	244931474668808	249596190061237	-0.2917	0.4655	6.06	0.7525	nonDE
105039062	XM_010915041	LOC105039062	pyrophosphate-energized vacuolar membrane proton pump	protein_coding	XP_010913343.1	.	400	432	2704	2109	1259	703	2254	4239	276599942232102	308650795918951	782059825262846	561744930511699	909543612110497	434441831544964	610028225307727	12345837219015	-0.9837	1054	7495	0.4885	nonDE
105039064	XM_010915046,XM_010915047,XM_029262718	LOC105039064	probable anion transporter 6, chloroplastic, transcript variant X3	protein_coding	XP_010913348.1		211	214	271	153	196	213	159	149	145906469527434	15289645908948	783795165111802	407524771779469	141596940407988	131630313113908	430321596379453	433953702673563	0.102	0.07595	4735	0.9586	nonDE
105039067	XM_010915054,XM_010915063	LOC105039067	CTP synthase, transcript variant X2	protein_coding	XP_010913356.1		73	150	276	219	309	81	273	262	504794894573586	107170415249636	798256330519769	583319771370612	22323191115341	500565979447255	738854061708117	76305953087566	-0.4785	0.5284	4656	0.724	nonDE
105039068	XM_010915052	LOC105039068	protein S-acyltransferase 24	protein_coding	XP_010913354.1	.	47	73	180	241	57	63	170	170	32500493212272	521562687548227	520601954686806	64191810456766	411787020574252	389329095125643	460092272858534	495114962781917	-0.03262	0.03584	3876	0.9809	nonDE
105039069	XM_010915053,XM_029262719	LOC105039069	protein PHOX1, transcript variant X2	protein_coding	XP_010913355.1		410	616	1242	1435	1086	1000	2605	2388	283514940787905	440113171958504	359215348733896	382220946080744	784562639199365	617982690675624	705023747527342	695490900660716	-1161	3116	7313	0.09928	nonDE
105039073	XM_010915062	LOC105039073	threonine--tRNA ligase, mitochondrial 1	protein_coding	XP_010913364.1	.	526	574	1191	1061	343	246	839	874	363728924035214	410105455688606	34446496001777	282603779645762	24779464571398	152023741906203	227069068781359	254547339689056	0.4609	1.21	6438	0.4281	nonDE
105039074	XM_010915064	LOC105039074	ubiquitin-like domain-containing protein CIP73	protein_coding	XP_010913366.1	.	151	185	253	226	68	128	284	217	104416478192619	132176845474551	731734969643122	601964695569673	491254691211389	791017844064798	768624738187198	631999687786329	0.1416	0.2467	4597	0.8641	nonDE
105039075	XM_010915065,XM_019848582,XM_019848583	LOC105039075	uncharacterized LOC105039075, transcript variant X1	protein_coding	XP_010913367.1		255	331	499	464	211	204	500	466	176332463172965	236489382984196	144322430771509	123589211833774	152433440949416	126068468897827	135321256723098	135719748621396	0.03894	0.08295	5574	0.9552	nonDE
105039077	XM_010915067	LOC105039077	uncharacterized LOC105039077	protein_coding	XP_010913369.1	.	11	7	143	219	45	25	222	185	0.760649841138281	0.5001286044983	413589330667851	583319771370612	325095016242831	154495672668906	600826379850557	538801577145027	-0.4109	0.2146	3007	0.8825	nonDE
105039079	XM_010915069,XM_010915070,XM_010915071,XM_019848564	LOC105039079	homeobox protein knotted-1-like 11, transcript variant X3	protein_coding	XP_010913371.1		170	192	318	281	137	79	148	84	117554975448643	137178131519534	91973011994669	748460528562292	989733716117062	488206325633743	400550919900371	244645040433418	1029	1888	4457	0.2161	nonDE
105039081	XM_010915072,XM_010915073,XM_010915074,XM_010915075,XM_010915077,XM_019847513	LOC105039081	chaperone protein dnaJ A7A, chloroplastic, transcript variant X2	protein_coding	XP_010913374.1		33	39	103	62	14	39	43	45	228194952341484	278643079649053	297900007404117	16514075719168	101140671719992	241013249363493	116376280781865	131059843089331	0.674	0.8149	2539	0.5982	nonDE
105039082	XM_010915078,XM_010915079,XR_830831,XR_830832	LOC105039082	aberrant root formation protein 4, transcript variant X1	protein_coding	XP_010913380.1		73	114	126	156	66	59	115	77	504794894573586	814495155897231	364421368280764	415515453579066	476806023822818	364609787498618	311238890463126	224257953730633	0.4756	0.901	3695	0.5591	nonDE
105039084	XM_010915082,XM_010915083	LOC105039084	uncharacterized LOC105039084, transcript variant X1	protein_coding	XP_010913384.1		17	0	65	49	24	22	51	84	117554975448643	0	187995150303569	130514469393425	173384008662843	135956191948637	13802768185756	244645040433418	-1201	0.5062	1644	0.7342	nonDE
105039085	XM_010915084	LOC105039085	transmembrane 9 superfamily member 11	protein_coding	XP_010913386.1	.	12	8	66	116	56	11	179	162	0.829799826696306	0.571575547998057	190887383385162	308973029584434	404562686879967	0.679780959743186	484450099068692	471815435121592	-1.17	0.6279	2624	0.6779	nonDE
105039086	XM_010915087,XM_010915101,XR_002163468,XR_002163469,XR_830842	LOC105039086	zinc finger CCCH domain-containing protein 8, transcript variant X2	protein_coding	XP_010913389.1		166	116	313	310	127	116	463	319	114788976026322	828784544597182	905268954538724	825703785958401	917490379174211	716859921183724	125307483725589	92906866545548	-0.2684	0.5545	4877	0.7134	nonDE
105039090	XM_010915088,XM_010915089,XM_010915090,XM_019848476,XR_003799878	LOC105039090	uncharacterized LOC105039090, transcript variant X1	protein_coding	XP_010913390.1		163	160	283	362	206	222	413	357	112714476459582	114315109599611	818501962090923	964208937151423	148821274102274	137192157329988	111775358053279	103974142184203	-0.4992	1785	5145	0.243	nonDE
105039095	XM_010915096	LOC105039095	protein disulfide isomerase-like 2-3	protein_coding	XP_010913398.1	.	283	280	498	648	109	110	238	360	195694459129212	20005144179932	14403320746335	172598726871304	787452372677079	679780959743186	644129182001948	104847874471465	0.953	2677	5213	0.1231	nonDE
105039096	XM_010915131,XM_010915210	LOC105039096	serine/threonine protein phosphatase 2A 57 kDa regulatory subunit B' kappa isoform, transcript variant X1	protein_coding	XP_010913433.1		140	125	226	196	138	136	208	231	968099797812357	893086793746964	653644676440101	522057877573699	996958049811347	840456459318848	562936427968089	672773861191899	-0.222	0.483	4.56	0.7432	nonDE
105039099	XM_010915098	LOC105039099	E3 ubiquitin-protein ligase COP1	protein_coding	XP_010913400.1	.	950	893	385	414	710	844	316	230	656924862801242	638021205452831	111350973641345	110271408834445	512927692294244	521577390930226	855230342489981	669861420234358	0.2943	0.1342	6187	0.9255	nonDE
105039101	XM_010915099	LOC105039101	EH domain-containing protein 1	protein_coding	XP_010913401.1	.	22	18	1251	863	51	18	1071	1406	152129968227656	128604498299563	36181835850733	229865279768419	368441018408541	111236884321612	289858131900877	409489198630221	-0.5747	0.1424	4542	0.9222	nonDE
105039104	XM_010915102,XM_010915103	LOC105039104	probable plastidic glucose transporter 1, transcript variant X2	protein_coding	XP_010913404.1		41	58	65	79	39	0	51	42	283514940787905	414392272298591	187995150303569	210421287389399	28174901407712	0	13802768185756	122322520216709	1287	0.6272	2.02	0.678	nonDE
105039105	XM_010915104,XM_029262722,XR_830835	LOC105039105	putative transcription elongation factor SPT5 homolog 1, transcript variant X3	protein_coding	XP_010913406.1		328	344	494	362	192	204	332	248	226811952630324	245777485639164	142876314230712	964208937151423	138707206930274	126068468897827	898533144641373	722285357470091	0.4902	0.9851	5376	0.517	nonDE
105039107	XM_010915106,XM_010915107,XM_019847924	LOC105039107	malonyl-CoA decarboxylase, mitochondrial, transcript variant X1	protein_coding	XP_010913408.1		35	34	76	73	52	19	90	80	242024949453089	242919607899174	219809714201096	194439923790204	375665352102827	117416711228369	243578262101577	232995276603255	-0.2581	0.3803	2839	0.788	nonDE
105039111	XM_010915114	LOC105039111	pyrophosphate--fructose 6-phosphate 1-phosphotransferase subunit beta	protein_coding	XP_010913416.1	.	596	547	1702	1571	268	381	958	1462	412133913925832	390814780943671	492258070487191	418445370238919	193612143006841	235451405147413	259275527881456	425798867992449	0.436	0.7308	6737	0.6326	nonDE
105039113	XM_010915117,XM_029262725,XR_003799879,XR_830840,XR_830841	LOC105039113	DExH-box ATP-dependent RNA helicase DExH15 chloroplastic, transcript variant X5	protein_coding	XP_010913419.1		705	679	272	324	242	384	292	134	48750739818408	485124746363351	786687398193396	862993634356522	1748288754017	23730535321944	790276139262894	390267088310452	0.7526	0.4874	5.53	0.7421	nonDE
105039115	XM_010915120	LOC105039115	uncharacterized LOC105039115	protein_coding	XP_010913422.1	.	213	119	90	122	65	187	79	80	147289469238594	850218627647109	260300977343403	324954393183629	469581690128533	115562763156342	213807585622495	232995276603255	0.3611	0.2398	3934	0.8671	nonDE
105039120	XM_010915126,XM_019847364,XM_019847365,XM_029262726	LOC105039120	alanine--tRNA ligase, chloroplastic/mitochondrial, transcript variant X3	protein_coding	XP_010913428.1		2727	2712	203	263	1490	1770	332	234	188572010616736	193764110771341	587123315563453	700516437764708	107642572044848	109382936249585	898533144641373	681511184064521	0.1182	0.0289	6.66	0.9866	nonDE
105039121	XM_010915132	LOC105039121	actin-related protein 2/3 complex subunit 2A	protein_coding	XP_010913434.1	.	118	135	292	226	58	72	105	129	815969829584701	964533737246721	844532059825263	601964695569673	419011354268537	444947537286449	284174639118506	375704883522749	0.9185	2549	4118	0.1331	nonDE
105039122	XM_010915130	LOC105039122	uncharacterized LOC105039122	protein_coding	XP_010913432.1	.	318	305	1090	834	288	218	602	642	219896954074521	217913177674259	315253405893677	222140954028809	208060810395412	134720226567286	16292679309461	186978709474112	0.2843	0.5459	6005	0.7183	nonDE
105039123	XM_010915134	LOC105039123	betaine aldehyde dehydrogenase 2	protein_coding	XP_010913436.1	.	665	575	2422	2548	463	673	2357	2274	45984740396087	410819925123603	700498852361913	678675240845808	334486650045401	415902350824695	637904404192686	662289073744752	-0.06988	0.06832	7.36	0.9612	nonDE
105039124	XM_010915135	LOC105039124	alpha-mannosidase 2	protein_coding	XP_010913437.1	.	154	143	296	217	116	122	249	193	106490977759359	102169129204653	856100992151636	577992650170881	838022708537075	753938882624261	67389985848103	562101104805353	0.08313	0.169	4618	0.9082	nonDE
105039126	XM_010915138,XM_010915139,XR_002163986	LOC105039126	chromatin remodeling protein EBS, transcript variant X1	protein_coding	XP_010913440.1		201	177	249	225	62	126	151	137	138991470971631	12646108999457	720166037316748	599301134969807	447908689045678	778658190251286	408670195303757	399004411183074	0.7011	1474	4421	0.3312	nonDE
105039128	XM_010915141	LOC105039128	uncharacterized LOC105039128	protein_coding	XP_010913443.1	.	44	24	76	86	34	72	121	71	304259936455312	171472664399417	219809714201096	22906621158846	245627345605694	444947537286449	327477441269898	206783307985389	-0.4253	0.6818	3.04	0.6496	nonDE
105039131	XM_010915145,XM_010915147,XM_029262731	LOC105039131	O-fucosyltransferase 15, transcript variant X1	protein_coding	XP_010913447.1		43	26	78	89	45	0	78	88	29734493789951	185762053099368	225594180364283	237056893388057	325095016242831	0	211101160488033	256294804263581	0.688	0.3024	2173	0.8285	nonDE
105039135	XM_010915155	LOC105039135	isocitrate dehydrogenase [NADP]	protein_coding	XP_010913457.1	.	593	433	902	1203	168	332	691	658	410059414359091	309365265353948	260879423959722	320426340163857	12136880606399	205170253304307	187013976791322	191638615006177	0.6548	1738	6.22	0.2529	nonDE
105039137	XM_010915154,XM_029262732	LOC105039137	uncharacterized LOC105039137, transcript variant X1	protein_coding	XP_010913456.1		102	87	110	159	117	39	147	145	70532985269186	621588408447887	31814563897527	423506135378664	84524704223136	241013249363493	397844494765909	4223039388434	-0.003954	0.003862	3872	0.9986	nonDE
105039145	XM_010915164,XR_830844,XR_830845,XR_830846	LOC105039145	protein CREG1, transcript variant X1	protein_coding	XP_010913466.1	.	54	52	50	58	55	41	45	63	373409922013338	371524106198737	144611654079668	154486514792217	397338353185682	253372903177006	121789131050789	183483780325063	-0.04356	0.04102	2856	0.977	nonDE
105039146	XM_010915166,XM_010915167,XM_010915168,XR_003799880,XR_830847,XR_830848	LOC105039146	ferredoxin-thioredoxin reductase catalytic chain, chloroplastic, transcript variant X5	protein_coding	XP_010913468.1		775	521	122	127	243	313	45	35	535912388074698	372238575633734	352852435954391	338272196182958	175551308771129	19342858218147	121789131050789	101935433513924	1485	0.5751	4575	0.7051	nonDE
105039149	XM_010915174	LOC105039149	U-box domain-containing protein 41	protein_coding	XP_010913476.1	.	4	43	70	84	15	15	122	96	0.276599942232102	307221857048955	202456315711536	223739090388728	108365005414277	0.926974036013436	33018386640436	279594331923906	-0.6971	0.4881	2345	0.7421	nonDE
105039153	XM_010915180,XM_010915181	LOC105039153	chaperone protein dnaJ 16, transcript variant X1	protein_coding	XP_010913482.1		42	35	106	155	42	54	148	155	290429939343707	25006430224915	306576706648897	4128518929792	303422015159975	333710652964837	400550919900371	451428348418807	-0.3728	0.5915	3427	0.6973	nonDE
105039155	XM_010915184,XM_010915187,XM_010915188	LOC105039155	alpha-mannosidase I MNS5, transcript variant X2	protein_coding	XP_010913486.1		134	130	268	217	80	112	185	180	926609806477542	928810265496842	775118465867022	577992650170881	57794669554281	692140613556699	500688649875464	524239372357324	0.2598	0.7363	4.41	0.6308	nonDE
105039156	XM_010915198	LOC105039156	uncharacterized LOC105039156	protein_coding	XP_010913500.1	.	132	92	133	192	104	49	192	133	912779809365937	657311880197765	384666999851918	511403635174235	751330704205653	302811518431056	519633625816698	387354647352912	0.1128	0.141	4048	0.9222	nonDE
105039157	XM_010915189	LOC105039157	GPI ethanolamine phosphate transferase 1	protein_coding	XP_010913491.1	.	38	71	116	150	81	64	200	134	262769945120497	507273298848275	33549903746483	399534089979871	585171029237095	395508922032399	541285026892393	390267088310452	-0.5189	1025	3721	0.4991	nonDE
105039164	XM_010915200,XM_010915201,XM_010915203,XM_019847863,XM_029262735,XR_830854,XR_830855	LOC105039164	DNA polymerase lambda, transcript variant X6	protein_coding	XP_010913502.1		62	45	119	121	58	68	159	121	428729910459758	321511245748907	344175736709611	322290832583763	419011354268537	420228229659424	430321596379453	352405355862423	-0.3749	0.9779	3585	0.521	nonDE
105039166	XM_010915205,XM_010915206	LOC105039166	cyclin-D2-1, transcript variant X1	protein_coding	XP_010913507.1		0	0	102	85	12	0	57	95	0	0	295007774322523	226402650988594	0.866920043314215	0	154266232664332	276681890966365	-0.9359	0.1664	0.4165	0.9087	nonDE
105039167	XM_010915219	LOC105039167	probable plastid-lipid-associated protein 14, chloroplastic	protein_coding	XP_010913521.1	.	343	357	270	108	218	185	233	125	237184450464027	255065588294133	780902932030209	287664544785507	157490474535416	11432679777499	630597056329638	364055119692586	0.1997	0.1119	4883	0.9397	nonDE
105039170	XM_010915209,XR_830856	LOC105039170	protein LSM12 homolog, transcript variant X2	protein_coding	XP_010913511.1	.	111	93	337	260	74	108	196	162	767564839694083	664456574547741	974682548496964	692525755965111	534600693377099	667421305929674	530459326354545	471815435121592	0.3222	0.6905	4.36	0.6472	nonDE
105039171	XM_010915213,XM_029262738,XR_003799881,XR_003799882,XR_003799883,XR_830858	LOC105039171	uncharacterized LOC105039171, transcript variant X2	protein_coding	XP_010913515.1		746	729	991	845	578	497	1440	1313	51585889226287	520848218113229	286620298385903	225070870688661	41756648752968	307137397265785	389725219362523	382403497725092	-0.2286	0.4568	6861	0.7539	nonDE
105039179	XM_010915237,XM_029262741	LOC105039179	protease Do-like 9, transcript variant X2	protein_coding	XP_010913539.1		364	245	302	294	133	201	282	269	251705947431213	175045011574405	873454390641197	783086816360548	960836381339922	1242145208258	763211887918275	783446617578445	0.2785	0.4032	5124	0.7768	nonDE
105039184	XM_010915242,XM_019847106	LOC105039184	kinesin-like protein KIN-4C, transcript variant X1	protein_coding	XP_010913544.1		43	25	112	134	14	68	139	134	29734493789951	178617358749393	323930105138457	356917120382018	101140671719992	420228229659424	376193093690213	390267088310452	-0.2927	0.3151	3165	0.823	nonDE
105039185	XM_019848614,XM_029262746,XM_029262748,XM_029262749	LOC105039185	uncharacterized LOC105039185, transcript variant X1	protein_coding	XP_019704173.1		19	25	131	80	22	15	46	81	131384972560248	178617358749393	378882533688731	213084847989265	158935341274273	0.926974036013436	12449555618525	235907717560796	0.6005	0.5434	2479	0.7195	nonDE
105039187	XM_010915254,XM_019851822	LOC105039187	glutamate synthase 1 [NADH], chloroplastic, transcript variant X2	protein_coding	XP_010913556.1		1187	1044	9769	9766	2979	1709	7827	14817	820810328573763	745906090137464	282542249740856	260123328182895	215212900752754	105613241836464	211831895274338	431536376678804	-0.8667	0.6304	9123	0.6764	nonDE
105039189	XM_019847933	LOC105039189	probable RNA-dependent RNA polymerase 2	protein_coding	XP_019703492.1	.	116	83	119	105	42	32	116	103	802139832473096	593009631047984	344175736709611	27967386298591	303422015159975	1977544610162	313945315597588	299981418626691	0.3382	0.4906	3503	0.7412	nonDE
105039191	XM_010915257	LOC105039191	AP-1 complex subunit gamma-2	protein_coding	XP_010913559.1	.	459	367	779	939	450	374	1003	1002	317398433711337	262210282644108	225304957056123	2501083403274	325095016242831	231125526312683	271454440986535	291826583945577	-0.2981	0.913	6415	0.5546	nonDE
105039195	XM_010915267,XM_010915269,XM_029262755,XM_029262757	LOC105039195	probable alpha,alpha-trehalose-phosphate synthase [UDP-forming] 9, transcript variant X1	protein_coding	XP_010913569.1		0	0	436	464	36	99	859	1164	0	0	126101362357471	123589211833774	260076012994265	611802863768868	232481919050283	339008127457736	-2664	0.326	3.07	0.8152	nonDE
105039197	XM_010915272,XM_029262758,XM_029262759	LOC105039197	U4/U6 small nuclear ribonucleoprotein Prp31 homolog, transcript variant X1	protein_coding	XP_010913574.1		539	359	668	620	336	356	545	408	372718422157757	256494527164128	193201169850437	16514075719168	24273761212798	220001837880522	147500169828177	11882759106766	0.2345	0.4222	6004	0.7689	nonDE
105039198	XM_010915274	LOC105039198	aldehyde dehydrogenase family 2 member B7, mitochondrial	protein_coding	XP_010913576.1	.	1011	646	1411	1544	1027	1535	1879	1394	699106353991638	461547255008431	408094087812824	411253756619281	741939070403082	948603430187083	508537282765404	405994269481172	-0.6266	1388	7432	0.3608	nonDE
105039199	XM_010915278	LOC105039199	replication stress response regulator SDE2	protein_coding	XP_010913580.1	.	54	52	225	237	93	90	287	186	373409922013338	371524106198737	650752443358507	631263862168197	671863033568517	556184421608061	776744013590584	541714018102568	-0.5043	0.7836	4.14	0.6088	nonDE
105039204	XM_010915280	LOC105039204	homeobox-leucine zipper protein HOX16	protein_coding	XP_010913582.1	.	44	50	162	222	120	252	329	188	304259936455312	357234717498785	468541759218125	59131045317021	866920043314215	155731638050257	890413869237987	547538900017649	-1165	1794	4282	0.2413	nonDE
105039205	XM_010915281	LOC105039205	DEAD-box ATP-dependent RNA helicase 29	protein_coding	XP_010913583.1	.	195	288	955	1021	360	358	1107	728	13484247183815	2057671972793	276208259292166	271949537246299	260076012994265	221237803261873	29960126238494	212025701708962	-0.3917	0.5769	6181	0.7036	nonDE
105039206	XM_010915282	LOC105039206	RNA-binding protein 25	protein_coding	XP_010913584.1	.	223	174	240	274	167	180	216	234	154204467794397	124317681689577	694135939582408	729815604363232	120646372694562	111236884321612	584587829043785	681511184064521	0.02625	0.03268	4868	0.9833	nonDE
105039209	XM_010915285,XM_029262762	LOC105039209	probable acyl-activating enzyme 17, peroxisomal, transcript variant X1	protein_coding	XP_010913587.1		199	207	162	169	89	96	188	159	137608471260471	147895173044497	468541759218125	450141741377322	642965698791376	593263383048599	50880792527885	463078112248969	0.2732	0.3348	4401	0.8128	nonDE
105039211	XM_010915288,XM_010915289	LOC105039211	protein CHAPERONE-LIKE PROTEIN OF POR1, chloroplastic, transcript variant X1	protein_coding	XP_010913590.1		393	336	259	200	103	197	160	143	27175944324304	240061730159184	749088368132682	532712119973162	744106370511368	121742590063098	433028021513915	416479056928318	0.7748	0.7573	4833	0.6227	nonDE
105039217	XM_010915327	LOC105039217	protein PGR	protein_coding	XP_010913629.1	.	35	40	63	66	6	43	49	41	242024949453089	285787773999028	182210684140382	175794999591143	0.433460021657108	265732556990518	132614831588636	119410079259168	0.4721	0.4787	2356	0.7468	nonDE
105039218	XM_010915294,XM_019848693	LOC105039218	importin-9, transcript variant X2	protein_coding	XP_010913596.1		131	143	405	508	101	79	550	385	905864810810134	102169129204653	117135439804531	135308878473183	729657703122798	488206325633743	148853382395408	112128976865317	0.05785	0.05162	4962	0.9721	nonDE
105039219	XM_010915295	LOC105039219	enolase 1, chloroplastic	protein_coding	XP_010913597.1	.	63	64	229	445	37	7	126	120	435644909015561	457260438398445	662321375684881	118528446694029	26730034668855	0.432587883472937	341009566942208	349492914904883	0.9588	0.7467	3.48	0.6278	nonDE
105039221	XM_010915301,XM_019853776	LOC105039221	long chain acyl-CoA synthetase 4, transcript variant X2	protein_coding	XP_010913603.1		86	93	276	302	77	71	190	222	594689875799019	664456574547741	798256330519769	804395301159474	556273694459955	438767710379693	514220775547774	646561892574033	0.2256	0.3721	4289	0.7906	nonDE
105039228	XM_010915308	LOC105039228	cyclic nucleotide-gated ion channel 17	protein_coding	XP_010913610.1	.	27	0	43	54	8	18	160	92	186704961006669	0	124366022508515	143832272392754	0.57794669554281	111236884321612	433028021513915	267944568093743	-1.98	0.77	1664	0.6161	nonDE
105039230	XM_010915310	LOC105039230	probable cyclic nucleotide-gated ion channel 14	protein_coding	XP_010913612.1	.	27	32	49	56	18	39	218	101	186704961006669	228630219199223	141719420998075	149159393592485	130038006497132	241013249363493	590000679312709	29415653671161	-1355	1542	2796	0.3158	nonDE
105039232	XM_010915311,XM_019847661	LOC105039232	probable xyloglucan glycosyltransferase 5, transcript variant X1	protein_coding	XP_010913613.1		0	15	172	56	9	8	85	330	0	107170415249636	497464090034059	149159393592485	0.650190032485661	0.494386152540499	230046136429267	961105515988427	-1525	0.4058	1812	0.7759	nonDE
105039238	XM_010915316	LOC105039238	histidine kinase 5	protein_coding	XP_010913618.1	.	0	0	48	83	0	0	143	141	0	0	138827187916482	221075529788862	0	0	387018794228061	410654175013237	-1504	0.2428	-0.06735	0.8671	nonDE
105039239	XM_010915317,XR_830869	LOC105039239	RNA-binding protein with multiple splicing 2, transcript variant X1	protein_coding	XP_010913619.1	.	154	153	380	312	135	170	311	193	106490977759359	109313823554628	109904857100548	831030907158133	975285048728492	105057057414856	841698216817672	562101104805353	0.1128	0.2136	4867	0.8825	nonDE
105039242	XM_010915323,XM_010915332	LOC105039242	spermine synthase, transcript variant X1	protein_coding	XP_010913625.1		186	163	389	328	87	152	385	460	128618973137927	116458517904604	112507866873982	873647876755985	628517031402806	939333689826948	104197367676786	133972284046872	-0.06316	0.08933	5021	0.9516	nonDE
105039245	XM_010915324	LOC105039245	zinc finger protein CONSTANS-LIKE 4	protein_coding	XP_010913626.1	.	50	67	98	44	193	213	31	87	345749927790128	478694521448372	28343884199615	117196666394096	139429640299703	131630313113908	83899179168321	25338236330604	-0.7739	0.3482	3.47	0.8041	nonDE
105039247	XM_010915326,XM_029262764,XM_029262765	LOC105039247	ADP-ribosylation factor 1, transcript variant X1	protein_coding	XP_010913628.1		138	143	279	257	159	130	294	263	954269800700752	102169129204653	806933029764549	684535074165513	114866905739134	803377497878311	795688989531818	765971971833201	-0.2151	0.6009	4771	0.6924	nonDE
105039252	XM_010915334,XM_019848414,XM_019848415,XM_019848416,XR_002164001	LOC105039252	26S proteasome regulatory subunit 4 homolog A, transcript variant X1	protein_coding	XP_010913636.1		780	749	1887	1950	702	601	1272	1214	539369887352599	535137606813181	545764382496668	519394316973833	507148225338816	37140759709605	344257277103562	35357033224544	0.2148	0.5644	7173	0.7089	nonDE
105039254	XM_010915336,XM_010915337,XM_010915338,XR_830871	LOC105039254	general transcription and DNA repair factor IIH subunit TFB1-1, transcript variant X1	protein_coding	XP_010913638.1		83	87	254	218	95	91	263	186	573944880131612	621588408447887	734627202724715	580656210770747	686311700957087	562364248514818	711789810363497	541714018102568	-0.1797	0.3616	4305	0.7993	nonDE
105039255	XM_010915339,XM_029262766	LOC105039255	bifunctional dethiobiotin synthetase/7,8-diamino-pelargonic acid aminotransferase, mitochondrial, transcript variant X2	protein_coding	XP_010913641.1		104	64	90	90	68	63	97	121	719159849803465	457260438398445	260300977343403	239720453987923	491254691211389	389329095125643	262523238042811	352405355862423	-0.1923	0.2509	3563	0.8622	nonDE
105039256	XM_010915342,XM_010915343,XM_010915344	LOC105039256	calmodulin-binding protein 60 C, transcript variant X1	protein_coding	XP_010913644.1		357	336	1166	1207	468	439	1732	1335	246865448442151	240061730159184	337234377313786	321491764403803	338098816892544	271294401206599	468752833288813	388810867831682	-0.5391	1018	6658	0.5016	nonDE
105039259	XM_010915347	LOC105039259	4-coumarate--CoA ligase 2	protein_coding	XP_010913649.1	.	27	100	715	1044	242	186	1581	1851	186704961006669	714469434997571	206794665333926	278075726625991	1748288754017	114944780465666	427885813758437	539092821240781	-1492	0.839	5632	0.5861	nonDE
105039260	XM_010915349	LOC105039260	uncharacterized LOC105039260	protein_coding	XP_010913651.1	.	120	98	133	235	52	67	159	92	829799826696306	700180046297619	384666999851918	625936740968465	375665352102827	414048402752668	430321596379453	267944568093743	0.5109	0.9837	3.91	0.5174	nonDE
105039261	XM_010915350,XM_019847407	LOC105039261	uncharacterized LOC105039261, transcript variant X2	protein_coding	XP_010913652.1		15	17	156	116	32	0	155	208	103724978337038	121459803949587	451188360728565	308973029584434	231178678217124	0	419495895841605	605787719168463	0.1513	0.04601	2302	0.9755	nonDE
105039263	XM_010915355	LOC105039263	uncharacterized LOC105039263	protein_coding	XP_010913657.1	.	47	45	69	90	26	0	68	67	32500493212272	321511245748907	199564082629942	239720453987923	187832676051413	0	184036909143414	195133544155226	1059	0.5002	2096	0.7357	nonDE
105039265	XM_010915357	LOC105039265	histone H4	protein_coding	XP_010913659.1	.	33	13	65	45	12	79	74	111	228194952341484	0.928810265496842	187995150303569	119860226993961	0.866920043314215	488206325633743	200275459950186	323280946287016	-0.8807	0.8492	2563	0.5845	nonDE
105039267	XM_010915359	LOC105039267	NADPH--cytochrome P450 reductase-like	protein_coding	XP_010913661.1	.	647	506	976	1134	246	291	1213	1063	447400406560425	361521534108771	282281948763513	302047772024783	177718608879414	179832962986607	328289368810237	309592473786575	0.2915	0.4966	6.5	0.7371	nonDE
105039272	XM_010915373	LOC105039272	60S ribosomal protein L35a-1	protein_coding	XP_010913675.1	.	239	211	691	598	108	110	192	293	165268465483681	150753050784487	199853305938102	159280923871975	780228038982794	679780959743186	519633625816698	853345200559422	1081	2657	5099	0.1259	nonDE
105039273	XM_010915370,XM_029262770	LOC105039273	uncharacterized LOC105039273, transcript variant X1	protein_coding	XP_010913672.1		182	86	174	134	54	61	100	85	125852973715606	614443714097911	503248556197246	356917120382018	390114019491397	376969441312131	270642513446197	247557481390959	0.8	1319	3802	0.3904	nonDE
105039274	XM_010915374	LOC105039274	ACT domain-containing protein DS12, chloroplastic	protein_coding	XP_010913676.1	.	3530	2430	308	296	764	1238	178	174	24409944901983	17361607270441	890807789130757	78841393756028	551939094243384	765062571056422	48174367393423	50676472661208	1292	0.4348	6433	0.7632	nonDE
105039276	XM_029262771	LOC105039276	pentatricopeptide repeat-containing protein At2g18940, chloroplastic	protein_coding	XP_029118604.1	.	207	218	52	34	69	78	53	30	143140470105113	15575433682947	150396120242855	905610603954375	498479024905674	482026498726987	143440532126484	873732287262207	0.9248	0.4176	3318	0.7715	nonDE
105039277	XM_010915377	LOC105039277	plasma membrane ATPase	protein_coding	XP_010913679.1	.	287	277	582	500	123	204	310	327	198460458551533	197908033494327	168327965348734	13317802999329	888593044397071	126068468897827	83899179168321	952368193115805	0.6132	2177	5358	0.1755	nonDE
105039284	XM_010915389,XM_010915391,XM_019848691,XM_029262773,XM_029262774,XM_029262775	LOC105039284	E3 ubiquitin-protein ligase RLIM, transcript variant X5	protein_coding	XP_010913691.1		0	28	79	63	25	17	61	118	0	20005144179932	228486413445876	167804317791546	180608342357128	105057057414856	16509193320218	343668032989801	-1161	0.4531	1867	0.7555	nonDE
105039288	XM_010915396,XR_830883	LOC105039288	villin-5, transcript variant X2	protein_coding	XP_010913698.1	.	387	526	1095	1080	389	243	1563	1261	267610444109559	375810922808722	316699522434474	287664544785507	281026580707691	150169793834177	423014248516405	367258804745881	-0.09183	0.09744	6553	0.9463	nonDE
105039291	XM_010915398,XR_003799900,XR_830885,XR_830887	LOC105039291	AUGMIN subunit 1, transcript variant X3	protein_coding	XP_010913700.1	.	38	71	75	120	31	0	82	86	262769945120497	507273298848275	216917481119502	319627271983897	223954344522839	0	221926861025881	250469922348499	1014	0.4383	2316	0.7621	nonDE
105039292	XM_010915401,XM_010915409,XM_010915415,XM_010915431,XM_019855186,XM_029263994	LOC105039292	probable protein phosphatase 2C 52, transcript variant X4	protein_coding	XP_010913703.1		58	70	342	333	79	96	183	176	401069916236548	5001286044983	989143713904931	886965679755315	570722361848525	593263383048599	49527579960654	512589608527161	0.1622	0.1629	4233	0.9093	nonDE
105039295	XM_010915402	LOC105039295	glutaredoxin-C8	protein_coding	XP_010913704.1	.	38	14	182	157	13	0	47	67	262769945120497	10002572089966	526386420849993	418179014178932	0.939163380257066	0	127201981319712	195133544155226	2114	0.6579	1938	0.6585	nonDE
105039297	XM_010915404,XM_029262778	LOC105039297	probable protein phosphatase 2C 59, transcript variant X1	protein_coding	XP_010913706.1		177	187	201	184	59	85	161	96	122395474437705	133605784344546	581338849400267	490095150375309	426235687962822	52528528707428	435734446648377	279594331923906	0.7705	1386	4202	0.3608	nonDE
105039299	XM_010915405,XM_010915406,XM_029262776,XM_029262777	LOC105039299	uncharacterized protein slr1919, transcript variant X1	protein_coding	XP_010913707.1		64	59	100	77	44	30	82	79	442559907571363	421536966648567	289223308159337	205094166189667	317870682548546	185394807202687	221926861025881	230082835645714	0.1497	0.2251	3136	0.8783	nonDE
105039302	XM_010915411	LOC105039302	WRKY transcription factor WRKY51	protein_coding	XP_010913713.1	.	204	204	724	684	487	860	1206	946	141065970538372	145751764739504	20939767510736	182187545030821	351825050911686	531465113981036	326394871216113	275516914583349	-1294	2839	6.28	0.1091	nonDE
105039306	XM_010915414	LOC105039306	coatomer subunit beta-1	protein_coding	XP_010913716.1	.	17	39	128	153	15	19	71	149	117554975448643	278643079649053	370205834443951	407524771779469	108365005414277	117416711228369	1921561845468	433953702673563	0.323	0.2404	2812	0.8671	nonDE
105039309	XM_019848215,XM_029262781,XM_029262783,XM_029262784,XM_029262785	LOC105039309	calcium-transporting ATPase 5, plasma membrane-type, transcript variant X1	protein_coding	XP_019703774.1		407	335	1500	1324	368	559	1758	1177	281440441221164	239347260724186	433834962239005	352655423422233	265855479949693	345452324087674	475789538638414	342794300702539	-0.3422	0.5061	6723	0.7342	nonDE
105039311	XM_010915421,XM_019847390	LOC105039311	60S ribosomal protein L7-2, transcript variant X1	protein_coding	XP_010913723.1		382	404	1360	850	253	295	671	800	264152944831657	288645651739019	393343699096698	226402650988594	182775642465414	182304893749309	181601126522398	232995276603255	0.3422	0.7262	6222	0.6351	nonDE
105039313	XM_010915424,XM_019848124,XM_029262787	LOC105039313	mannosyl-oligosaccharide 1,2-alpha-mannosidase MNS1, transcript variant X1	protein_coding	XP_010913726.1		160	170	190	182	57	74	133	117	110639976892841	121459803949587	54952428550274	484768029175577	411787020574252	457307191099962	359954542883442	340755592032261	0.7338	1548	4124	0.3142	nonDE
105039314	XM_010915425,XR_003799910	LOC105039314	GATA transcription factor 17, transcript variant X2	protein_coding	XP_010913727.1	.	43	58	118	129	50	71	109	87	29734493789951	414392272298591	341283503628017	343599317382689	361216684714256	438767710379693	295000339656354	25338236330604	0.01102	0.01512	3429	0.9936	nonDE
105039317	XM_010915432	LOC105039317	B-box zinc finger protein 32	protein_coding	XP_010913734.1	.	1	6	79	110	7	24	73	85	0.0691499855580255	0.428681660998542	228486413445876	292991665985239	0.505703358599959	14831584576215	197569034815724	247557481390959	-0.7658	0.3069	1712	0.8273	nonDE
105039319	XM_010915434,XM_029262790,XR_002163783	LOC105039319	DNA ligase 4, transcript variant X2	protein_coding	XP_010913736.1		352	318	513	505	200	302	523	411	24340794916425	227201280329228	14837155708574	134509810293223	144486673885703	186630772584038	141546034532361	119701323354922	0.09908	0.2237	5692	0.879	nonDE
105039321	XM_010915436,XM_010915437	LOC105039321	uncharacterized membrane protein At1g16860, transcript variant X2	protein_coding	XP_010913738.1		10	31	323	320	50	58	207	374	0.691499855580255	221485524849247	934191285354657	852339391957059	361216684714256	358429960591862	560230002833627	108925291812022	-0.3045	0.1471	3747	0.92	nonDE
105039323	XM_010915443	LOC105039323	uncharacterized LOC105039323	protein_coding	XP_010913745.1	.	30	43	128	133	34	28	133	116	207449956674077	307221857048955	370205834443951	354253559782153	245627345605694	173035153389175	359954542883442	33784315107472	-0.08694	0.0929	3184	0.9492	nonDE
105039325	XM_010915440,XM_010915441,XM_029262792	LOC105039325	uncharacterized LOC105039325, transcript variant X1	protein_coding	XP_010913742.3		78	76	136	149	56	57	159	78	539369887352599	542996770598154	393343699096698	396870529380006	404562686879967	352250133685106	430321596379453	227170394688174	0.2346	0.4224	3664	0.7687	nonDE
105039326	XM_010915444	LOC105039326	TBC1 domain family member 5 homolog A	protein_coding	XP_010913746.1	.	6	10	52	88	14	18	69	41	0.414899913348153	0.714469434997571	150396120242855	234393332788191	101140671719992	111236884321612	186743334277876	119410079259168	-0.2283	0.1209	1876	0.9334	nonDE
105039331	XM_010915454,XM_010915456,XM_019847929,XM_019847930,XM_019847931,XM_029262795	LOC105039331	glycosyltransferase BC10, transcript variant X5	protein_coding	XP_010913756.1		43	60	110	96	55	33	125	121	29734493789951	428681660998542	31814563897527	255701817587118	397338353185682	203934287922956	338303141807746	352405355862423	-0.2669	0.4556	3333	0.7539	nonDE
105039332	XM_010915457	LOC105039332	V-type proton ATPase catalytic subunit A	protein_coding	XP_010913759.1	.	311	438	843	718	173	218	499	507	215056455085459	312937612528936	243815248778321	191243651070365	124980972911133	134720226567286	135050614209652	147660756547313	0.5762	1866	5825	0.2214	nonDE
105039337	XM_010915467	LOC105039337	mitochondrial outer membrane import complex protein METAXIN	protein_coding	XP_010913769.3	.	41	35	91	70	31	23	96	59	283514940787905	25006430224915	263193210424996	186449241990607	223954344522839	142136018855393	259816812908349	171834016494901	-0.0163	0.01812	2796	0.9912	nonDE
105039338	XM_010915468,XM_019848523,XM_019848524,XM_029262798,XM_029262799,XR_003799915	LOC105039338	pumilio homolog 5, transcript variant X6	protein_coding	XP_010913770.1		399	428	501	563	258	366	766	548	275908442376522	30579291817896	144900877387828	149958461772445	186387809312556	226181664787278	207312165299787	15960176447323	-0.1326	0.26	5984	0.8583	nonDE
105039339	XM_010915471	LOC105039339	transcription factor GTE7	protein_coding	XP_010913773.1	.	719	676	418	327	327	472	260	159	497188396162203	482981338058358	120895342810603	87098431615612	236235711803124	291687829998894	703670534960111	463078112248969	0.7511	0.5056	5713	0.7344	nonDE
105039342	XM_010915472	LOC105039342	reticulon-like protein B23	protein_coding	XP_010913774.1	.	25	36	168	98	24	43	99	66	172874963895064	257208996599126	485895157707685	261028938786849	173384008662843	265732556990518	267936088311735	192221103197685	0.3326	0.3706	2975	0.7917	nonDE
105039343	XM_010915474,XM_029262800,XM_029262801	LOC105039343	bZIP transcription factor RISBZ4, transcript variant X3	protein_coding	XP_010913776.1		50	36	176	155	23	32	178	96	345749927790128	257208996599126	509033022360432	4128518929792	166159674968558	1977544610162	48174367393423	279594331923906	0.08133	0.07202	3301	0.9599	nonDE
105039347	XM_010915482,XM_010915483,XM_019847978,XM_019847979,XM_029262803	LOC105039347	ethanolamine-phosphate cytidylyltransferase, transcript variant X3	protein_coding	XP_010913784.1		6	42	57	53	18	18	51	80	0.414899913348153	30007716269898	164857285650822	141168711792888	130038006497132	111236884321612	13802768185756	232995276603255	-0.3409	0.2382	2163	0.8673	nonDE
105039349	XM_010915487	LOC105039349	26S proteasome non-ATPase regulatory subunit 1 homolog A	protein_coding	XP_010913789.1	.	492	437	920	991	382	564	1052	1000	340217928945486	312223143093938	26608544350659	263958855446702	275969547121692	348542237541052	284715924145399	291244095754069	-0.2394	0.8688	6551	0.5728	nonDE
105039357	XM_010915496	LOC105039357	probable serine/threonine-protein kinase PBL17	protein_coding	XP_010913798.1	.	13	34	96	113	40	0	68	160	0.898949812254332	242919607899174	277654375832963	300982347784836	288973347771405	0	184036909143414	46599055320651	0.631	0.233	2152	0.8707	nonDE
105039359	XM_010915500	LOC105039359	serine/threonine-protein kinase STY13	protein_coding	XP_010913802.1	.	313	327	846	698	251	329	1028	953	21643945479662	233631505244206	244682918702799	185916529870634	181330775726557	20331630523228	27822050382269	277555623253628	-0.2989	0.6492	6154	0.6636	nonDE
105039360	XM_010915504	LOC105039360	abscisic acid receptor PYL8	protein_coding	XP_010913806.1	.	107	70	148	167	87	152	113	74	739904845470873	5001286044983	428050496075818	44481462017759	628517031402806	939333689826948	305826040194202	215520630858011	0.1475	0.1385	3926	0.9235	nonDE
105039361	XM_019848345,XM_029262807,XM_029262808,XM_029262809,XM_029262810	LOC105039361	YTH domain-containing protein ECT4-like, transcript variant X2	protein_coding	XP_019703904.2		106	144	565	466	140	115	398	405	73298984691507	10288359863965	163411169110025	124121923953747	101140671719992	710680094276967	107715720351586	117953858780398	0.0008748	0.0008353	5047	0.9997	nonDE
105039367	XM_010915507	LOC105039367	probable protein phosphatase 2C 44	protein_coding	XP_010913809.1	.	36	67	176	181	59	109	176	198	248939948008892	478694521448372	509033022360432	482104468575712	426235687962822	67360113283643	476330823665306	576663309593056	-0.4866	0.7667	3896	0.6179	nonDE
105039368	XM_010915508	LOC105039368	chitinase-like protein 1	protein_coding	XP_010913810.1	.	0	0	69	278	0	0	53	201	0	0	199564082629942	740469846762695	0	0	143440532126484	585400632465678	0.1396	0.01836	0.1006	0.9912	nonDE
105039369	XM_010915513	LOC105039369	ATP-dependent zinc metalloprotease FTSH 9, chloroplastic/mitochondrial	protein_coding	XP_010913815.2	.	478	480	85	104	310	161	83	108	330536930967362	342945328798834	245839811935436	277010302386044	223954344522839	994952131987754	224633286160343	314543623414394	0.3442	0.1285	4608	0.9299	nonDE
105039370	XM_010915509,XM_010915510,XM_029262815,XM_029262816,XR_003799923	LOC105039370	pre-mRNA-splicing factor ATP-dependent RNA helicase DEAH7, transcript variant X1	protein_coding	XP_010913811.1		469	494	807	694	383	436	1073	808	32431343226714	3529479008888	233403209684585	184851105630687	27669198049112	269440453134572	290399416927769	235325229369288	-0.2277	0.6961	6396	0.6451	nonDE
105039371	XM_010915511,XM_029262812,XM_029262813,XM_029262814,XR_003799922	LOC105039371	stromal processing peptidase, chloroplastic, transcript variant X3	protein_coding	XP_010913813.1		2063	1612	904	845	714	703	1152	969	142656420206207	115172472921608	26145787057604	225070870688661	515817425771958	434441831544964	311780175490019	282215528785693	0.4799	0.4201	7176	0.7707	nonDE
105039372	XM_010915512	LOC105039372	probable calcium-binding protein CML31	protein_coding	XP_010913814.1	.	76	32	224	349	295	428	551	288	525539890240994	228630219199223	647860210276914	929582649353168	213117843981411	264496591609167	149124024908854	838782995771718	-1693	1988	4867	0.201	nonDE
105039375	XM_010915516,XM_019848700,XM_029262820,XM_029262821	LOC105039375	kinesin-like protein KIN-14I, transcript variant X1	protein_coding	XP_010913818.1		0	92	125	103	165	57	88	130	0	657311880197765	361529135199171	274346741786178	119201505955705	352250133685106	238165411832653	37861732448029	-1109	0.415	2885	0.773	nonDE
105039381	XM_029262054	LOC105039381	protein SWEETIE	protein_coding	XP_029117887.1	.	676	607	1242	1152	633	788	1241	1135	467453902372252	433682947043526	359215348733896	306842181104541	457300322848249	486970360252392	33586735918673	330562048680868	-0.263	0.8557	6953	0.5805	nonDE
105039422	XM_010915553,XM_019848356	LOC105039422	DExH-box ATP-dependent RNA helicase DExH12, transcript variant X2	protein_coding	XP_010913855.1		3109	3338	8153	9121	3355	3687	14914	10076	214987305099901	238489897402189	235803763142307	242943362313761	242376395443266	227850218052102	403636244553658	2934575508818	-0.4688	0.8513	9668	0.5833	nonDE
105039431	XM_010915566,XM_029262849,XM_029262850,XM_029262851,XM_029262852,XR_003799940,XR_003799941,XR_003799942	LOC105039431	pyrophosphate--fructose 6-phosphate 1-phosphotransferase subunit alpha, transcript variant X1	protein_coding	XP_010913868.1		112	131	400	417	45	101	237	222	774479838249886	935954959846818	115689323263735	111070477014404	325095016242831	62416251758238	641422756867486	646561892574033	0.6335	1073	4529	0.4801	nonDE
105039433	XM_010915567,XM_019848236,XM_019848237,XM_029262843,XM_029262844,XM_029262845,XM_029262846,XM_029262847,XM_029262848,XR_003799938,XR_003799939	LOC105039433	brefeldin A-inhibited guanine nucleotide-exchange protein 1, transcript variant X9	protein_coding	XP_010913869.1		334	358	721	801	356	406	1054	823	230960951763805	25578005772913	208530005182882	213351204049251	25718627951655	250900972414303	285257209172291	239693890805599	-0.3989	1566	6257	0.3057	nonDE
105039434	XM_010915568	LOC105039434	bZIP transcription factor 50	protein_coding	XP_010913870.1	.	42	52	138	123	18	46	103	100	290429939343707	371524106198737	399128165259885	327617953783495	130038006497132	284272037710787	278761788849583	291244095754069	0.1859	0.2633	3181	0.8551	nonDE
105039435	XM_010915569,XM_010915570	LOC105039435	cell division cycle protein 27 homolog B, transcript variant X2	protein_coding	XP_010913871.1		40	38	142	136	51	59	98	120	276599942232102	271498385299077	410697097586258	36224424158175	368441018408541	364609787498618	265229663177273	349492914904883	-0.01672	0.01966	3392	0.9909	nonDE
105039437	XM_010915573,XM_029262842	LOC105039437	AT-rich interactive domain-containing protein 5, transcript variant X2	protein_coding	XP_010913875.1		148	163	286	176	102	134	234	166	102341978625878	116458517904604	827178661335703	468786665576382	736882036817083	828096805505336	6333034814641	483465198951754	0.1068	0.1636	4546	0.909	nonDE
105039440	XM_010915580	LOC105039440	SWI/SNF complex subunit SWI3B	protein_coding	XP_010913882.1	.	75	56	175	198	80	75	166	149	518624891685191	40010288359864	506140789278839	52738499877343	57794669554281	463487018006718	449266572320686	433953702673563	-0.1293	0.2324	3936	0.871	nonDE
105039442	XM_010915582,XM_010915583,XM_010915585,XM_019848482,XM_019848483,XM_029262841	LOC105039442	RNA polymerase I-specific transcription initiation factor RRN3, transcript variant X2	protein_coding	XP_010913884.2		440	494	733	889	412	372	773	573	304259936455312	3529479008888	212000684880794	23679053732807	297642548204547	229889560931332	20920666289391	166882866867081	0.08831	0.189	6276	0.896	nonDE
105039446	XM_010915590,XM_010915591	LOC105039446	citrate synthase, mitochondrial, transcript variant X2	protein_coding	XP_010913892.1		56	65	110	86	31	26	75	57	387239919124943	464405132748421	31814563897527	22906621158846	223954344522839	160675499575662	202981885084648	166009134579819	0.5376	1032	3004	0.4959	nonDE
105039447	XM_010915592	LOC105039447	GTP 3',8-cyclase, mitochondrial	protein_coding	XP_010913894.1	.	99	108	250	293	97	131	282	361	684584857024453	771626989797377	723058270398342	780423255760682	700760368345657	809557324785067	763211887918275	105139118567219	-0.3648	0.8185	4627	0.5959	nonDE
105039448	XM_010915594,XM_010915595,XM_010915597,XM_010915598,XM_029262840	LOC105039448	uncharacterized LOC105039448, transcript variant X3	protein_coding	XP_010913896.1		87	69	178	122	100	65	130	94	601604874354822	492983910148324	514817488523619	324954393183629	722433369428513	401688748939155	351835267480056	273769450008825	0.1096	0.1519	3804	0.9149	nonDE
105039450	XM_010915599,XM_029262839	LOC105039450	protein N-terminal asparagine amidohydrolase, transcript variant X1	protein_coding	XP_010913901.1		32	41	105	148	52	81	114	83	221279953785682	292932468349004	303684473567303	39420696878014	375665352102827	500565979447255	308532465328664	241732599475877	-0.1035	0.1213	3348	0.9333	nonDE
105039451	XM_010915600	LOC105039451	zinc finger CCCH domain-containing protein 31	protein_coding	XP_010913902.1	.	155	155	196	192	40	51	154	156	10718247761494	110742762424623	5668776839923	511403635174235	288973347771405	315171172244568	416789470707143	454340789376347	0.6772	1384	4066	0.3611	nonDE
105039453	XM_010915604,XM_010915606,XM_029262838	LOC105039453	protein EMSY-LIKE 3, transcript variant X1	protein_coding	XP_010913906.1		148	214	230	196	169	283	268	231	102341978625878	15289645908948	665213608766474	522057877573699	122091239433419	174889101461202	725321936035807	672773861191899	-0.4357	0.6176	4884	0.6835	nonDE
105039454	XM_010915607	LOC105039454	protein adenylyltransferase SelO	protein_coding	XP_010913909.1	.	45	49	187	133	62	127	172	101	311174935011115	35009002314881	540847586257959	354253559782153	447908689045678	784838017158042	465505123127458	29415653671161	-0.358	0.4732	3747	0.7493	nonDE
105039455	XM_010915608	LOC105039455	probable serine/threonine-protein kinase DDB_G0280111	protein_coding	XP_010913910.1	.	183	175	324	289	110	88	283	233	126544473571187	125032151124575	937083518436251	769769013361219	794676706371364	543824767794549	765918313052737	67859874310698	0.337	0.9487	4742	0.5396	nonDE
105039460	XM_010915612	LOC105039460	linoleate 13S-lipoxygenase 2-1, chloroplastic	protein_coding	XP_010913914.2	.	711	458	25	11	375	260	6	44	491656397317561	327227001228887	723058270398342	292991665985239	270912513535692	160675499575662	162385508067718	12814740213179	1089	0.2237	3554	0.879	nonDE
105039462	XM_010915615,XM_010915616,XM_010915617,XM_010915618,XR_830914,XR_830915	LOC105039462	uncharacterized LOC105039462, transcript variant X2	protein_coding	XP_010913917.1		78	89	247	287	105	49	91	134	539369887352599	635877797147838	714381571153561	764441892161487	758555037899938	302811518431056	246284687236039	390267088310452	0.7427	1.21	4	0.4281	nonDE
105039463	XM_010915619	LOC105039463	TBCC domain-containing protein 1	protein_coding	XP_010913921.1	.	107	48	115	119	27	0	85	72	739904845470873	342945328798834	332606804383237	316963711384031	195057009745698	0	230046136429267	20969574894293	1512	0.6956	2456	0.6456	nonDE
105039465	XM_010915625,XM_010915640	LOC105039465	RNA polymerase sigma factor sigE, chloroplastic/mitochondrial, transcript variant X2	protein_coding	XP_010913927.1		516	434	22	24	476	649	8	25	356813925479412	310079734788946	636291277950541	639254543967794	343878283847972	40107076624848	216514010756957	728110239385172	0.6401	0.1231	3756	0.9327	nonDE
105039467	XM_010915624	LOC105039467	60S ribosomal protein L6	protein_coding	XP_010913926.1	.	83	104	225	191	45	65	140	139	573944880131612	743048212397474	650752443358507	50874007457437	325095016242831	401688748939155	378899518824675	404829293098156	0.4472	1187	3932	0.4334	nonDE
105039468	XM_010915626	LOC105039468	protein ABHD18	protein_coding	XP_010913928.1	.	0	0	58	49	45	7	84	99	0	0	167749518732415	130514469393425	325095016242831	0.432587883472937	227339711294805	288331654796528	-3.07	0.8403	1015	0.5861	nonDE
105039469	XM_010915627,XM_010915628	LOC105039469	uncharacterized LOC105039469, transcript variant X1	protein_coding	XP_010913929.1		37	41	130	190	82	169	405	216	255854946564694	292932468349004	375990300607138	506076513974504	59239536293138	10443907472418	10961021794571	629087246828789	-1254	2076	4071	0.1912	nonDE
105039472	XM_019848409,XM_019848410,XM_029262832,XR_002163994,XR_002163995,XR_002163996,XR_002163997,XR_002163998,XR_002163999	LOC105039472	SURP and G-patch domain-containing protein 1-like protein, transcript variant X4	protein_coding	XP_019703968.1		87	88	160	158	66	54	144	117	601604874354822	628733102797862	462757293054939	420842574778798	476806023822818	333710652964837	389725219362523	340755592032261	0.2404	0.6107	3825	0.6854	nonDE
105039476	XM_029262829	LOC105039476	zinc finger A20 and AN1 domain-containing stress-associated protein 8	protein_coding	XP_029118662.1	.	130	98	531	559	156	266	650	253	898949812254332	700180046297619	153577576632608	148893037532499	112699605630848	164383395719716	175917633740028	736847562257794	-0.3152	0.3258	5.21	0.8152	nonDE
105039477	XM_029262828,XR_003799937	LOC105039477	putative disease resistance protein RGA3, transcript variant X2	protein_coding	XP_029118661.1	.	36	81	80	66	58	32	80	96	248939948008892	578720242348032	231378646527469	175794999591143	419011354268537	1977544610162	216514010756957	279594331923906	-0.2716	0.3778	3114	0.7881	nonDE
105039480	XM_010915642,XM_010915643	LOC105039480	zinc transporter ZTP29, transcript variant X2	protein_coding	XP_010913944.1		89	50	70	102	34	51	83	89	615434871466427	357234717498785	202456315711536	271683181186313	245627345605694	315171172244568	224633286160343	259207245221121	0.03055	0.0343	3224	0.9823	nonDE
105039482	XM_010915645	LOC105039482	outer envelope protein 80, chloroplastic-like	protein_coding	XP_010913947.1	.	59	127	115	91	53	100	107	62	40798491479235	907376182446915	332606804383237	242384014587789	382889685797112	617982690675624	28958748938743	180571339367523	0.2127	0.2072	3566	0.8859	nonDE
105039483	XM_010915646	LOC105039483	copper-transporting ATPase HMA4	protein_coding	XP_010913948.1	.	0	15	167	182	42	0	743	746	0	107170415249636	483002924626092	484768029175577	303422015159975	0	201087387490524	217268095432535	-2458	0.3504	2314	0.8036	nonDE
105039485	XM_010915648,XM_010915649	LOC105039485	ADP,ATP carrier protein 1, mitochondrial, transcript variant X2	protein_coding	XP_010913950.1		607	604	1613	1669	410	462	1350	1347	419740412337215	431539538738533	46651719606101	444548264117604	29619768146569	285508003092138	365367393152365	392305796980731	0.1813	0.3719	6918	0.7906	nonDE
105039488	XM_010915651,XM_010915653	LOC105039488	E3 ubiquitin-protein ligase UPL5, transcript variant X2	protein_coding	XP_010913953.1		253	209	308	372	144	199	407	381	174949463461805	149324111914492	890807789130757	990844543150081	104030405197706	122978555444449	110151502972602	1109640004823	-0.1064	0.2353	5217	0.8699	nonDE
105039489	XM_010915654	LOC105039489	glycerophosphodiester phosphodiesterase GDPDL4	protein_coding	XP_010913956.1	.	157	239	671	1056	143	80	1854	1838	1085654773261	170758194964419	194068839774915	281271999345829	103307971828277	494386152540499	501771219929249	535306647995979	-0.3821	0.1835	5876	0.8976	nonDE
105039490	gene-LOC105039490	LOC105039490	.	pseudogene	.	.	51	77	161	149	188	96	244	119	35266492634593	550141464948129	465649526136532	396870529380006	13581747345256	593263383048599	66036773280872	346580473947342	-0.7038	0.9881	4084	0.5157	nonDE
105039492	XM_010915657,XM_010915658	LOC105039492	fimbrin-4, transcript variant X1	protein_coding	XP_010913959.1		48	101	85	180	73	86	131	111	331919930678522	721614129347547	245839811935436	479440907975846	527376359682814	531465113981036	354541692614518	323280946287016	-0.2168	0.2663	3728	0.8516	nonDE
105039493	XM_010915659,XM_010915660	LOC105039493	growth hormone-regulated TBC protein 1, transcript variant X1	protein_coding	XP_010913961.1		15	15	64	48	66	20	75	66	103724978337038	107170415249636	185102917221975	127850908793559	476806023822818	123596538135125	202981885084648	192221103197685	-0.6618	0.6638	2424	0.6564	nonDE
105039494	XM_010915663,XR_003800562,XR_003800564,XR_830922,XR_830923	LOC105039494	protein SEH1, transcript variant X2	protein_coding	XP_010913965.1	.	108	135	219	274	69	80	271	158	746819844026676	964533737246721	633399044868947	729815604363232	498479024905674	494386152540499	733441211439193	460165671291429	0.2498	0.5223	4342	0.7285	nonDE
105039495	XM_010915661,XM_019848497,XM_019848498,XM_019848499,XM_029262827,XR_003799935,XR_830919	LOC105039495	DNA topoisomerase 1 beta, transcript variant X7	protein_coding	XP_010913963.1		305	338	679	596	304	338	722	596	210907455951978	241490669029179	19638262624019	158748211752002	219619744306268	208878149448361	195403894708154	173581481069425	-0.2035	0.7224	5978	0.6358	nonDE
105039497	XM_010915665	LOC105039497	cell division protein FtsZ homolog 1, chloroplastic	protein_coding	XP_010913967.1	.	104	131	51	67	56	49	58	57	719159849803465	935954959846818	147503887161262	178458560191009	404562686879967	302811518431056	156972657798794	166009134579819	0.405	0.3033	3.23	0.8285	nonDE
105039498	XM_010915666	LOC105039498	transcription initiation factor TFIID subunit 6	protein_coding	XP_010913968.1	.	402	334	311	314	156	259	368	308	277982941943263	238632791289189	899484488375537	836358028357864	112699605630848	160057516884987	995964449482004	897031814922532	0.1559	0.1767	5361	0.9024	nonDE
105039499	XM_010915667,XR_003799934	LOC105039499	serine/threonine-protein phosphatase PP-X isozyme 2, transcript variant X1	protein_coding	XP_010913969.1	.	153	175	761	564	220	205	493	457	105799477903779	125032151124575	220098937509255	150224817832432	158935341274273	126686451588503	133426759128975	133098551759609	-0.08955	0.1106	5481	0.9405	nonDE
105039501	XM_010915669	LOC105039501	fumarylacetoacetase	protein_coding	XP_010913971.1	.	391	267	531	657	123	156	329	423	27037644353188	190763339144351	153577576632608	174995931411184	888593044397071	964052997453973	890413869237987	123196252503971	0.7303	2142	5448	0.1831	nonDE
105039502	XM_010915670	LOC105039502	65-kDa microtubule-associated protein 1	protein_coding	XP_010913972.1	.	52	90	295	223	69	127	131	194	359579924901733	643022491497814	853208759070043	593974013770076	498479024905674	784838017158042	354541692614518	565013545762894	0.03163	0.02952	4144	0.9863	nonDE
105039506	XM_010915675	LOC105039506	sodium/hydrogen exchanger 6	protein_coding	XP_010913977.1	.	522	499	1074	1022	436	416	1087	911	360962924612893	356520248063788	310625832963127	272215893306286	314980949070831	257080799321059	294188412116016	265323371231957	-0.01779	0.04413	6577	0.9765	nonDE
105039512	XM_010915682	LOC105039512	bifunctional aspartokinase/homoserine dehydrogenase 1, chloroplastic	protein_coding	XP_010913984.1	.	406	364	474	592	134	171	449	312	280748941365584	260066874339116	137091848067526	157682787512056	968060715034207	105675040105532	121518488537342	908681578752695	0.7035	2026	5505	0.1972	nonDE
105039517	XM_010915687	LOC105039517	chlorophyll a-b binding protein 8, chloroplastic	protein_coding	XP_010913989.1	.	2245	1911	0	0	2434	4705	4	0	155241717577767	136535109028036	0	0	1758402821189	290760855962881	108257005378479	0	-1737	0.1427	2728	0.9222	nonDE
105039518	XM_010915689,XM_010915691	LOC105039518	uncharacterized LOC105039518, transcript variant X2	protein_coding	XP_010913991.1		28	9	73	57	25	35	74	74	193619959562471	0.643022491497814	211133014956316	151822954192351	180608342357128	216293941736468	200275459950186	215520630858011	-0.4874	0.5448	2444	0.7184	nonDE
105039520	XM_010915695,XM_010915696,XM_010915697	LOC105039520	ubiquitin-conjugating enzyme E2 8, transcript variant X3	protein_coding	XP_010913997.1		88	72	176	234	55	129	164	143	608519872910624	514417993198251	509033022360432	623273180368599	397338353185682	797197670971555	443853722051763	416479056928318	0.01417	0.01841	4061	0.9912	nonDE
105039522	XM_010915701,XM_010915702,XR_003799931	LOC105039522	uncharacterized WD repeat-containing protein C2A9.03, transcript variant X1	protein_coding	XP_010914003.1		43	62	254	342	132	119	259	172	29734493789951	442971049698494	734627202724715	910937725154107	953612047645637	735399401903992	700964109825649	500939844696998	-0.4336	0.4664	4299	0.7521	nonDE
105039523	XM_010915703,XM_010915704,XM_010915705,XM_010915706,XM_010915707,XM_010915708,XM_010915709,XM_010915710,XM_029262823,XM_029262824	LOC105039523	phosphatidylinositol/phosphatidylcholine transfer protein SFH13, transcript variant X1	protein_coding	XP_010914005.1		148	108	197	202	155	129	116	104	102341978625878	771626989797377	569769917073893	538039241172894	111977172261419	797197670971555	313945315597588	302893859584232	0.2798	0.3025	4288	0.8285	nonDE
105039526	XM_019848191	LOC105039526	cinnamoyl-CoA reductase 1-like	protein_coding	XP_019703750.1	.	189	146	252	242	62	0	106	109	130693472704668	104312537509645	728842736561528	644581665167526	447908689045678	0	286881064252968	317456064371935	2049	1226	3288	0.4265	nonDE
105039539	XM_010915723	LOC105039539	protein ENHANCED DISEASE RESISTANCE 4	protein_coding	XP_010914025.1	.	21	31	63	95	68	88	75	101	145214969671854	221485524849247	182210684140382	253038256987252	491254691211389	543824767794549	202981885084648	29415653671161	-0.6518	0.7903	3076	0.6054	nonDE
105039541	gene-LOC105039541	LOC105039541	.	pseudogene	.	.	0	38	84	93	0	0	88	57	0	271498385299077	242947578853843	24771113578752	0	0	238165411832653	166009134579819	1448	0.2569	0.587	0.861	nonDE
105039544	XM_010915725,XM_010915727,XM_010915729,XM_029262855	LOC105039544	monogalactosyldiacylglycerol synthase 1, chloroplastic, transcript variant X4	protein_coding	XP_010914027.1		643	520	260	232	615	419	260	213	444634407138104	371524106198737	751980601214275	617946059168868	444296522198535	258934747393086	703670534960111	620349923956167	-0.03048	0.01338	5644	0.9946	nonDE
105039547	XM_010915733	LOC105039547	protein TSS	protein_coding	XP_010914035.1	.	5567	4963	291	200	3493	2859	351	238	384957969601528	354591180589294	841639826743669	532712119973162	252345975941379	176681251264161	94995522219615	693160947894684	0.162	0.03284	7166	0.9833	nonDE
105039550	XM_010915735	LOC105039550	nudix hydrolase 3	protein_coding	XP_010914037.1	.	110	107	422	441	93	98	364	374	760649841138281	764482295447401	12205223604324	117463022454082	671863033568517	605623036862111	985138748944156	108925291812022	0.02102	0.02055	4805	0.9909	nonDE
105039551	XR_002163657	LOC105039551	uncharacterized LOC105039551	lncRNA	.	.	63	62	205	229	94	60	189	148	435644909015561	442971049698494	59290778172664	60995537736927	679087367262802	370789614405374	511514350413312	431041261716022	-0.05752	0.0709	3989	0.9599	nonDE
105039552	XM_010915741	LOC105039552	zinc finger CCCH domain-containing protein 18	protein_coding	XP_010914043.1	.	152	83	190	158	28	45	147	103	105107978048199	593009631047984	54952428550274	420842574778798	202281343439984	278092210804031	397844494765909	299981418626691	0.6488	1.21	3741	0.4281	nonDE
105039553	XM_010915742	LOC105039553	probable serine incorporator	protein_coding	XP_010914044.1	.	122	143	481	555	128	271	495	580	843629823807911	102169129204653	139116411224641	147827613292552	924714712868496	167473309173094	133968044155867	16892157553736	-0.4282	0.6262	5315	0.678	nonDE
105039559	XM_010915751	LOC105039559	mitochondrial adenine nucleotide transporter ADNT1	protein_coding	XP_010914053.1	.	544	274	608	523	202	360	345	271	376175921435659	195764625189334	175847771360877	139304219372982	14593154062456	222473768643225	933716671389379	789271499493527	0.5594	0.868	5664	0.5729	nonDE
105039560	XM_010915747	LOC105039560	S-adenosylmethionine decarboxylase proenzyme	protein_coding	XP_010914049.1	.	74	132	129	112	58	32	115	129	511709893129389	943099654196793	373098067525544	298318787184971	419011354268537	1977544610162	311238890463126	375704883522749	0.2672	0.3344	3629	0.8128	nonDE
105039562	XM_010915753	LOC105039562	UDP-glucuronate 4-epimerase 1	protein_coding	XP_010914055.1	.	61	80	604	743	375	699	726	706	421814911903956	571575547998057	174690878128239	19790255257003	270912513535692	431969900782261	196486464761939	205618331602373	-1508	1.51	5649	0.3201	nonDE
105039574	XM_010915764,XR_002164047	LOC105039574	probable E3 ubiquitin-protein ligase XBOS32, transcript variant X2	protein_coding	XP_010914066.1	.	45	38	57	73	61	51	101	45	311174935011115	271498385299077	164857285650822	194439923790204	440684355351393	315171172244568	273348938580659	131059843089331	-0.2724	0.3078	2974	0.8264	nonDE
105039578	XM_010915769	LOC105039578	eukaryotic translation initiation factor 3 subunit C	protein_coding	XP_010914071.1	.	126	197	310	299	133	88	316	223	871289818031121	140750478694521	896592255293943	796404619359877	960836381339922	543824767794549	855230342489981	649474333531574	0.1679	0.3024	4.74	0.8285	nonDE
105039584	XM_010915776	LOC105039584	probable alpha,alpha-trehalose-phosphate synthase [UDP-forming] 9	protein_coding	XP_010914078.1	.	121	75	759	625	419	265	1114	1130	836714825252109	535852076248178	219520490892936	166472537491613	302699581790547	16376541302904	301495759979063	329105828202098	-1323	1478	5777	0.3304	nonDE
105039586	XM_010915778,XM_029262863,XR_003799957,XR_003799958	LOC105039586	serine/arginine-rich splicing factor RSZ21A, transcript variant X4	protein_coding	XP_010914080.1		109	129	537	429	112	106	360	287	753734842582478	921665571146866	155312916481564	114266749734243	809125373759934	655061652116161	974313048406308	835870554814178	0.1943	0.2432	4873	0.8671	nonDE
105039587	XM_010915779	LOC105039587	probable cyclic nucleotide-gated ion channel 14	protein_coding	XP_010914081.1	.	0	35	99	104	11	0	67	102	0	25006430224915	286331075077743	277010302386044	0.794676706371364	0	181330484008952	29706897766915	0.3317	0.06598	1243	0.9632	nonDE
105039588	gene-LOC105039588	LOC105039588	.	pseudogene	.	.	0	57	131	107	15	18	83	186	0	407247577948615	378882533688731	285000984185642	108365005414277	111236884321612	224633286160343	541714018102568	-0.7889	0.2768	2236	0.8417	nonDE
105039589	XM_010915781	LOC105039589	UDP-galactose/UDP-glucose transporter 7	protein_coding	XP_010914083.1	.	102	114	159	126	82	132	190	133	70532985269186	814495155897231	459865059973345	335608635583092	59239536293138	815737151691823	514220775547774	387354647352912	-0.2501	0.4136	4.13	0.7732	nonDE
105039592	XM_010915789,XM_010915798	LOC105039592	serine/threonine-protein kinase HSL1-like, transcript variant X1	protein_coding	XP_010914091.1		14	7	87	153	8	15	255	133	0.968099797812357	0.5001286044983	251624278098623	407524771779469	0.57794669554281	0.926974036013436	690138409287802	387354647352912	-0.9254	0.5061	2468	0.7342	nonDE
105039593	XM_010915790,XM_010915791	LOC105039593	50S ribosomal protein L4, transcript variant X1	protein_coding	XP_010914092.1		46	26	131	115	30	29	72	61	318089933566917	185762053099368	378882533688731	306309468984568	216730010828554	179214980295931	194862609681262	177658898409982	0.5968	0.9613	2908	0.5306	nonDE
105039594	XM_010915792,XM_010915793	LOC105039594	eukaryotic translation initiation factor 3 subunit G, transcript variant X2	protein_coding	XP_010914094.1		8	0	111	62	14	0	47	42	0.553199884464204	0	321037872056864	16514075719168	101140671719992	0	127201981319712	122322520216709	0.3667	0.07477	0.7324	0.9586	nonDE
105039595	XM_010915795,XM_019848572,XM_019848573,XR_002164033	LOC105039595	diacylglycerol kinase 7, transcript variant X3	protein_coding	XP_010914097.1		63	68	90	71	37	61	78	42	435644909015561	485839215798348	260300977343403	189112802590472	26730034668855	376969441312131	211101160488033	122322520216709	0.3954	0.5291	3099	0.724	nonDE
105039603	XM_010915803,XM_010915804,XM_010915805	LOC105039603	DNA-dependent metalloprotease WSS1, transcript variant X1	protein_coding	XP_010914105.1		32	16	103	60	26	55	99	70	221279953785682	114315109599611	297900007404117	159813635991949	187832676051413	339890479871593	267936088311735	203870867027848	-0.3445	0.4219	2768	0.769	nonDE
105039608	XM_010915816	LOC105039608	uncharacterized LOC105039608	protein_coding	XP_010914118.1	.	37	29	59	67	23	43	61	53	255854946564694	207196136149296	170641751814009	178458560191009	166159674968558	265732556990518	16509193320218	154359370749656	-0.004763	0.005363	2617	0.9976	nonDE
105039615	XM_010915823,XM_010915824	LOC105039615	calmodulin-binding protein 60 B, transcript variant X1	protein_coding	XP_010914125.1		429	409	454	536	286	395	465	400	296653438043929	292217998914006	131307381904339	142766848152807	206615943656555	244103162816871	125848768752481	116497638301628	0.08281	0.1059	5848	0.9415	nonDE
105039619	XM_010915829	LOC105039619	4-coumarate--CoA ligase 1	protein_coding	XP_010914131.1	.	44	60	339	529	242	144	454	943	304259936455312	428681660998542	980467014660151	140902355732901	1748288754017	889895074572898	122871701104573	274643182296087	-1294	1189	4978	0.4334	nonDE
105039633	XM_010915845,XM_010915846,XM_019847940	LOC105039633	probable small nuclear ribonucleoprotein F, transcript variant X2	protein_coding	XP_010914147.1		83	54	123	93	46	19	47	74	573944880131612	385813494898688	355744669035984	24771113578752	332319349937116	117416711228369	127201981319712	215520630858011	0.8925	1447	3054	0.3356	nonDE
105039636	XM_010915848,XR_830947	LOC105039636	NADPH--cytochrome P450 reductase, transcript variant X1	protein_coding	XP_010914150.1	.	180	186	710	647	314	131	698	646	124469974004446	132891314909548	205348548793129	172332370811318	226844078000553	809557324785067	188908474385445	188143685857128	-0.2317	0.2481	5642	0.864	nonDE
105039637	NM_001303564,XM_019846991	LOC105039637	AP2-like ethylene-responsive transcription factor AIL5	protein_coding	NP_001290493.1		0	0	230	96	4	0	96	159	0	0	665213608766474	255701817587118	0.288973347771405	0	259816812908349	463078112248969	-0.7092	0.1138	0.5861	0.9387	nonDE
105039638	XM_010915851,XM_010915852	LOC105039638	VIN3-like protein 2, transcript variant X1	protein_coding	XP_010914153.1		124	132	243	250	318	320	289	342	857459820919516	943099654196793	702812638827188	665890149966452	229733811478267	1977544610162	782156863859508	996054807478915	-0.9505	1684	5039	0.2672	nonDE
105039641	XM_010915855,XR_003799973	LOC105039641	U4/U6.U5 small nuclear ribonucleoprotein 27 kDa protein, transcript variant X2	protein_coding	XP_010914157.1	.	31	19	166	162	24	43	114	92	214364955229879	135749192649538	480110691544499	431496817178261	173384008662843	265732556990518	308532465328664	267944568093743	0.2783	0.2656	3073	0.8528	nonDE
105039642	XM_010915857	LOC105039642	probable receptor-like serine/threonine-protein kinase At5g57670	protein_coding	XP_010914159.1	.	0	0	116	71	0	0	77	54	0	0	33549903746483	189112802590472	0	0	208394735353571	157271811707197	0.3168	0.04495	-0.2204	0.9758	nonDE
105039645	XM_010915858,XM_010915859,XM_010915860	LOC105039645	uncharacterized LOC105039645, transcript variant X1	protein_coding	XP_010914160.1		20	27	240	233	69	93	229	168	138299971116051	192906747449344	694135939582408	620609619768734	498479024905674	57472390232833	61977135579179	489290080866836	-0.4253	0.371	3749	0.7917	nonDE
105039646	XM_010915862	LOC105039646	cytoplasmic 60S subunit biogenesis factor REI1 homolog 1	protein_coding	XP_010914164.1	.	274	245	391	412	147	194	408	458	18947096042899	175045011574405	113086313490301	109738696714471	106197705305991	119888641991071	110422145486048	133389795855364	0.03522	0.07005	5354	0.96	nonDE
105039648	XM_010915864	LOC105039648	aldehyde dehydrogenase family 2 member B7, mitochondrial	protein_coding	XP_010914166.1	.	1194	829	1449	1469	1063	2111	2206	1538	825650827562825	592295161612986	419084573522879	391277052120287	767946671702509	130456146001624	59703738466231	447933419269758	-0.6935	1276	7613	0.4071	nonDE
105039650	XM_010915865,XM_019848761	LOC105039650	U4/U6 small nuclear ribonucleoprotein Prp31 homolog, transcript variant X2	protein_coding	XP_010914167.1		452	339	484	520	286	266	490	353	312557934722275	242205138464176	139984081149119	138505151193022	206615943656555	164383395719716	132614831588636	102809165801186	0.2137	0.3739	5746	0.7903	nonDE
105039655	XM_010915871	LOC105039655	adagio-like protein 1	protein_coding	XP_010914173.1	.	466	419	416	288	290	313	569	425	322238932700399	299362693263982	120316896194284	767105452761353	209505677134269	19342858218147	153995590150886	123778740695479	-0.1964	0.2112	5748	0.8836	nonDE
105039657	XM_010915873,XM_010915874,XM_010915875	LOC105039657	protein KAKU4, transcript variant X3	protein_coding	XP_010914175.1		81	51	43	63	29	45	80	80	560114883020007	364379411848761	124366022508515	167804317791546	209505677134269	278092210804031	216514010756957	232995276603255	-0.4885	0.6606	2961	0.6574	nonDE
105039658	XM_010915881,XM_010915890	LOC105039658	ubiquitin-conjugating enzyme E2 28, transcript variant X1	protein_coding	XP_010914183.1		902	726	1417	1480	471	747	1405	1364	62373286973339	518704809808236	40982942766178	39420696878014	340266117000829	461633069934691	380252731391906	39725694660855	0.07961	0.1906	7099	0.8952	nonDE
105039659	XM_010915878	LOC105039659	COP9 signalosome complex subunit 5a	protein_coding	XP_010914180.1	.	101	86	315	389	60	49	220	223	698414854136058	614443714097911	91105342070191	10361250733478	433460021657108	302811518431056	595413529581633	649474333531574	0.5181	0.7064	4289	0.6413	nonDE
105039662	XM_010915888,XM_029262884	LOC105039662	plasma membrane ATPase, transcript variant X2	protein_coding	XP_010914190.1		628	766	2336	2080	1109	2232	5202	8776	4342619093044	547283587208139	67562564786021	554020604772088	80117860669622	137933736558799	140788235494712	255595818433771	-1518	2412	8118	0.151	nonDE
105039666	XM_010915893,XM_019848758	LOC105039666	uncharacterized LOC105039666, transcript variant X2	protein_coding	XP_010914195.1		300	222	268	384	366	934	542	234	207449956674077	158612214569461	775118465867022	102280727034847	264410613210836	577195833091033	146688242287839	681511184064521	-0.8326	0.7288	5649	0.6333	nonDE
105039674	XM_010915905	LOC105039674	muscle M-line assembly protein unc-89	protein_coding	XP_010914207.1	.	119	100	216	178	81	70	214	130	822884828140504	714469434997571	624722345624167	474113786776114	585171029237095	432587883472937	579174978774861	37861732448029	0.1868	0.3925	4152	0.7813	nonDE
105039675	XM_010915906	LOC105039675	probable protein S-acyltransferase 19	protein_coding	XP_010914208.1	.	154	181	168	136	92	176	187	136	106490977759359	12931896773456	485895157707685	36224424158175	664638699874232	10876495355891	506101500144388	396091970225534	-0.0533	0.04832	4384	0.9744	nonDE
105039677	XM_010915915,XM_019848458,XM_029263896	LOC105039677	exosome complex component RRP41 homolog, transcript variant X2	protein_coding	XP_010914217.1		182	161	87	87	29	0	35	58	125852973715606	115029579034609	251624278098623	231729772188325	209505677134269	0	947248797061688	16892157553736	2431	0.5538	2478	0.7136	nonDE
105039679	XM_010915916,XM_010915917,XM_010915918	LOC105039679	probable potassium transporter 11, transcript variant X1	protein_coding	XP_010914218.1		250	166	265	297	511	446	584	290	172874963895064	118601926209597	766441766622242	791077498160145	36916345177797	275620280041328	158055227852579	8446078776868	-1057	1442	5495	0.337	nonDE
105039680	NM_001319907	LOC105039680	nuclear transcription factor Y subunit C-2-like	protein_coding	NP_001306836.1	.	9	19	197	149	4	16	105	97	0.62234987002223	135749192649538	569769917073893	396870529380006	0.288973347771405	0.988772305080998	284174639118506	282506772881447	0.6762	0.3272	2387	0.8152	nonDE
105039682	XM_010915923,XM_010915924,XM_029262885,XM_029262886,XM_029262887	LOC105039682	uncharacterized LOC105039682, transcript variant X3	protein_coding	XP_010914225.1		13	0	51	46	29	0	89	53	0.898949812254332	0	147503887161262	122523787593827	209505677134269	0	240871836967115	154359370749656	-0.7526	0.1687	0.9071	0.9082	nonDE
105039684	XM_010915928,XM_010915930,XM_010915932,XM_029262888	LOC105039684	bifunctional purine biosynthesis protein PurH, transcript variant X1	protein_coding	XP_010914230.1		241	192	432	369	118	268	444	353	166651465194841	137178131519534	124944469124833	982853861350484	852471375925645	165619361101067	120165275970111	102809165801186	-0.05746	0.09829	5272	0.9462	nonDE
105039685	XM_010915933	LOC105039685	glyceraldehyde-3-phosphate dehydrogenase GAPCP2, chloroplastic	protein_coding	XP_010914235.1	.	52	77	604	861	27	13	377	445	359579924901733	550141464948129	174690878128239	229332567648446	195057009745698	0.803377497878311	102032227569216	129603622610561	0.7251	0.3003	4256	0.8287	nonDE
105039687	XM_010915934,XM_010915935	LOC105039687	UDP-N-acetylglucosamine diphosphorylase 1, transcript variant X2	protein_coding	XP_010914236.1		153	204	616	751	112	141	300	682	105799477903779	145751764739504	178161557826151	200033401049922	809125373759934	87135559385263	81192754033859	198628473304275	0.3501	0.3726	5317	0.7906	nonDE
105039689	XM_010915940,XM_010915941,XM_019847037,XR_002163627,XR_002163629,XR_003799987	LOC105039689	probable serine/threonine protein kinase IRE4, transcript variant X1	protein_coding	XP_010914242.1		75	75	93	142	174	115	203	182	518624891685191	535852076248178	268977676588183	378225605180945	125703406280561	710680094276967	549404302295779	530064254272405	-0.9903	1948	4103	0.2072	nonDE
105039690	XM_010915942	LOC105039690	cytochrome P450 97B2, chloroplastic	protein_coding	XP_010914244.1	.	193	174	216	221	135	175	162	165	133459472126989	124317681689577	624722345624167	588646892570344	975285048728492	108146970868234	438440871782839	480552757994214	0.1877	0.228	4627	0.8756	nonDE
105039692	XM_010915944	LOC105039692	40S ribosomal protein S11	protein_coding	XP_010914246.1	.	80	66	198	226	38	37	144	121	553199884464204	471549827098397	572662150155486	601964695569673	274524680382835	228653595549981	389725219362523	352405355862423	0.4853	0.9047	3701	0.5591	nonDE
105039695	XM_010915947	LOC105039695	choline-phosphate cytidylyltransferase 2	protein_coding	XP_010914249.1	.	232	256	1555	1256	208	398	1811	1559	160427966494619	182904175359378	449742244187768	334543211343146	150266140841131	245957110888898	490133591851062	454049545280593	-0.4161	0.3308	6463	0.8141	nonDE
105039699	XM_010915952,XM_019848746,XM_029262890	LOC105039699	probable allantoate deiminase, transcript variant X1	protein_coding	XP_010914254.1		298	288	155	116	34	63	85	46	206066956962916	2057671972793	448296127646972	308973029584434	245627345605694	389329095125643	230046136429267	133972284046872	1752	1371	3845	0.3668	nonDE
105039701	XM_010915956,XM_029262891,XR_002164054	LOC105039701	protein SUPPRESSOR OF FRI 4, transcript variant X3	protein_coding	XP_010914258.1		137	146	246	256	169	222	389	235	94735480214495	104312537509645	711489338071968	681871513565647	122091239433419	137192157329988	105279937730571	684423625022062	-0.5259	1378	4888	0.3638	nonDE
105039703	XM_010915960,XM_010915968,XM_029263879	LOC105039703	G-box-binding factor 3, transcript variant X1	protein_coding	XP_010914262.1		32	46	281	197	84	113	226	212	221279953785682	328655940098883	812717495927736	524721438173564	606844030319951	698320440463455	611652080388404	617437482998626	-0.6275	0.7583	4034	0.6227	nonDE
105039709	XM_010915963,XM_010915964	LOC105039709	mitochondrial amidoxime reducing component 2, transcript variant X1	protein_coding	XP_010914265.1		0	19	44	51	20	26	108	52	0	135749192649538	127258255590108	135841590593156	144486673885703	160675499575662	292293914521892	151446929792116	-1684	0.7372	1647	0.6308	nonDE
105039711	XM_010915965	LOC105039711	ALA-interacting subunit 1	protein_coding	XP_010914267.1	.	133	197	1001	1122	316	602	2122	1777	919694807921739	140750478694521	289512531467496	298851499304944	22828894473941	372025579786726	574303413532829	51754075815498	-1235	1316	6418	0.3904	nonDE
105039713	XM_010915969,XM_010915970,XM_010915971,XM_029262900,XM_029262902,XM_029262903,XM_029262904,XM_029262905	LOC105039713	dihydroneopterin aldolase 2, transcript variant X8	protein_coding	XP_010914271.1		89	79	86	96	31	54	62	54	615434871466427	564430853648081	248732045017029	255701817587118	223954344522839	333710652964837	167798358336642	157271811707197	0.7435	1215	3184	0.4281	nonDE
105039714	XM_010915973,XM_010915974,XM_010915976,XM_019848767,XM_029262906,XM_029262907,XR_830968,XR_830969	LOC105039714	deoxyhypusine synthase, transcript variant X3	protein_coding	XP_010914275.1		301	244	218	200	65	41	90	112	208141456529657	174330542139407	630506811787354	532712119973162	469581690128533	253372903177006	243578262101577	326193387244557	1512	1.96	4185	0.2068	nonDE
105039715	XM_010915981,XM_010915990,XR_003800536,XR_003800537,XR_830972	LOC105039715	uncharacterized LOC105039715, transcript variant X2	protein_coding	XP_010914283.1		197	131	301	222	94	81	184	206	13622547154931	935954959846818	870562157559603	59131045317021	679087367262802	500565979447255	497982224741002	599962837253382	0.4404	1064	4499	0.4875	nonDE
105039716	XM_010915977,XM_010915978,XR_830970	LOC105039716	succinate-semialdehyde dehydrogenase, mitochondrial, transcript variant X3	protein_coding	XP_010914279.1		410	243	1233	1608	127	179	826	821	283514940787905	17361607270441	356612338960462	428300544458422	917490379174211	110618901630937	223550716106558	239111402614091	0.6602	0.702	6069	0.6426	nonDE
105039718	XM_010916333,XM_010917804,XR_831244	LOC105039718	protein SYS1 homolog, transcript variant X1	protein_coding	XP_010914635.1		47	57	105	149	36	59	186	109	32500493212272	407247577948615	303684473567303	396870529380006	260076012994265	364609787498618	503395075009926	317456064371935	-0.2704	0.4229	3491	0.7686	nonDE
105039720	XM_010915984	LOC105039720	translation initiation factor IF-2	protein_coding	XP_010914286.1	.	56	64	123	128	29	18	44	58	387239919124943	457260438398445	355744669035984	340935756782824	209505677134269	111236884321612	119082705916327	16892157553736	1203	2217	2924	0.172	nonDE
105039722	XM_010915986,XM_029262911,XM_029262913	LOC105039722	multiple RNA-binding domain-containing protein 1, transcript variant X2	protein_coding	XP_010914288.1		246	180	400	390	146	152	419	261	170108964472743	128604498299563	115689323263735	103878863394767	105475271936563	939333689826948	113399213133956	76014708991812	0.1839	0.4663	5132	0.7521	nonDE
105039747	XM_010916010,XM_010916015	LOC105039747	V-type proton ATPase subunit E, transcript variant X1	protein_coding	XP_010914312.1		350	274	1478	1874	333	307	920	1045	242024949453089	195764625189334	427472049459499	499151256414853	240570312019695	189720686037417	248991112370501	304350080063002	0.1551	0.1451	6456	0.9209	nonDE
105039763	XM_010916020	LOC105039763	26S proteasome non-ATPase regulatory subunit 8 homolog A	protein_coding	XP_010914322.1	.	199	93	362	361	103	119	286	277	137608471260471	664456574547741	10469883755368	961545376551557	744106370511368	735399401903992	774037588456122	806746145238771	0.1564	0.2559	4778	0.8619	nonDE
105039764	XM_010916021,XM_010916022,XM_010916025,XM_010916026,XM_029262916	LOC105039764	serine/threonine-protein kinase CTR1, transcript variant X1	protein_coding	XP_010914323.1		26	41	96	65	17	26	98	59	179789962450866	292932468349004	277654375832963	173131438991278	122813672802847	160675499575662	265229663177273	171834016494901	-0.04732	0.04501	2659	0.9758	nonDE
105039769	XM_010916033,XM_010916034	LOC105039769	potassium transporter 7, transcript variant X2	protein_coding	XP_010914335.1		86	74	299	222	62	43	264	174	594689875799019	528707381898202	864777691396417	59131045317021	447908689045678	265732556990518	714496235497959	50676472661208	0.2203	0.2491	4094	0.8638	nonDE
105039770	XM_010916035,XM_019848360,XR_003799999	LOC105039770	piezo-type mechanosensitive ion channel homolog, transcript variant X1	protein_coding	XP_010914337.1		300	285	587	555	308	273	1044	710	207449956674077	203623788974308	169774081889531	147827613292552	222509477783982	168709274554445	282550784037829	206783307985389	-0.4854	1426	5967	0.3436	nonDE
105039774	XM_010916037,XM_010916038,XM_010916039,XM_010916040	LOC105039774	putative E3 ubiquitin-protein ligase RF298, transcript variant X1	protein_coding	XP_010914339.1		114	100	254	257	64	65	303	246	788309835361491	714469434997571	734627202724715	684535074165513	462357356434248	401688748939155	820046815741976	716460475555009	0.06625	0.08482	4362	0.9545	nonDE
105039775	XM_010916082	LOC105039775	katanin p60 ATPase-containing subunit A1	protein_coding	XP_010914384.1	.	159	83	129	93	27	63	74	52	109948477037261	593009631047984	373098067525544	24771113578752	195057009745698	389329095125643	200275459950186	151446929792116	1045	1314	3392	0.3905	nonDE
105039776	XM_010916042,XM_019847977	LOC105039776	putative TrmH family tRNA/rRNA methyltransferase, transcript variant X2	protein_coding	XP_010914344.1		52	14	44	49	20	45	73	41	359579924901733	10002572089966	127258255590108	130514469393425	144486673885703	278092210804031	197569034815724	119410079259168	-0.3881	0.397	2411	0.7793	nonDE
105039779	XM_010916045,XM_010916046,XM_029262917	LOC105039779	nuclear pore complex protein NUP107, transcript variant X1	protein_coding	XP_010914347.1		198	202	255	226	150	152	395	269	136916971404891	144322825869509	737519435806308	601964695569673	108365005414277	939333689826948	106903792811248	783446617578445	-0.2522	0.497	4934	0.7368	nonDE
105039784	XM_010916050,XM_010916051	LOC105039784	receptor-like cytosolic serine/threonine-protein kinase RBK2, transcript variant X2	protein_coding	XP_010914352.1		46	46	60	126	191	136	46	89	318089933566917	328655940098883	173533984895602	335608635583092	137984773560846	840456459318848	12449555618525	259207245221121	-0.5511	0.3131	3481	0.8243	nonDE
105039789	XM_010916059	LOC105039789	ribosome biogenesis protein NOP53	protein_coding	XP_010914361.1	.	141	217	510	433	113	228	585	348	97501479636816	155039867394473	147503887161262	11533217397419	816349707454219	140900053474042	158325870366025	101352945322416	-0.1046	0.1417	5267	0.9222	nonDE
105039790	XM_010916060,XM_010916061,XM_010916062,XM_029262919	LOC105039790	squamosa promoter-binding-like protein 9, transcript variant X1	protein_coding	XP_010914362.1		46	56	141	131	104	23	310	239	318089933566917	40010288359864	407804864504665	348926438582421	751330704205653	142136018855393	83899179168321	696073388852224	-0.6854	0.5655	3769	0.7088	nonDE
105039793	XM_010916066	LOC105039793	histone H2AX	protein_coding	XP_010914368.1	.	63	77	135	125	27	78	99	127	435644909015561	550141464948129	390451466015104	332945074983226	195057009745698	482026498726987	267936088311735	369880001607667	0.1376	0.2068	3524	0.8861	nonDE
105039794	XM_010916067	LOC105039794	serine/threonine-protein phosphatase BSL1 homolog	protein_coding	XP_010914369.2	.	509	543	1447	1225	667	1265	1801	1390	35197342649035	387956903203681	41850612690656	326286173483562	481863057408818	781748103704664	4874271667166	404829293098156	-0.7414	1965	7119	0.2058	nonDE
105039795	XM_010916071	LOC105039795	lipase	protein_coding	XP_010914373.1	.	6	0	144	134	36	51	614	444	0.414899913348153	0	416481563749445	356917120382018	260076012994265	315171172244568	166174503255965	129312378514807	-2557	0.4705	2756	0.7502	nonDE
105039798	XM_010916077	LOC105039798	BTB/POZ domain-containing protein POB1	protein_coding	XP_010914379.1	.	118	101	457	467	177	329	865	409	815969829584701	721614129347547	132175051828817	124388280013733	127870706388847	20331630523228	23410577413096	119118835163414	-0.8774	1403	5337	0.3548	nonDE
105039800	XM_010916076,XM_029262921	LOC105039800	general transcription and DNA repair factor IIH helicase subunit XPD, transcript variant X1	protein_coding	XP_010914378.2		112	113	139	110	107	75	155	96	774479838249886	807350461547255	402020398341478	292991665985239	773003705288509	463487018006718	419495895841605	279594331923906	0.01168	0.0117	3948	0.9952	nonDE
105039801	XM_010916078	LOC105039801	sister-chromatid cohesion protein 3	protein_coding	XP_010914380.1	.	422	490	528	517	290	285	439	447	291812939054868	35009002314881	15270990670813	137706083013062	209505677134269	176125066842553	11881206340288	130186110802069	0.272	0.4734	5852	0.7493	nonDE
105039802	XM_010916080,XM_029262922	LOC105039802	cyclin-L1-1, transcript variant X2	protein_coding	XP_010914382.1		367	404	910	685	353	482	1278	895	253780446997954	288645651739019	263193210424996	182453901090808	255018979408265	297867656905651	345881132184239	260663465699892	-0.4527	1462	6388	0.334	nonDE
105039809	XM_010916087,XR_003800001,XR_830987	LOC105039809	syntaxin-132, transcript variant X3	protein_coding	XP_010914389.1	.	148	130	414	455	130	282	401	265	102341978625878	928810265496842	119738449577965	121192007293894	939163380257066	174271118770526	108527647891925	771796853748282	-0.1524	0.2171	5101	0.8817	nonDE
105039813	XM_010916091,XM_010916092,XR_002163689	LOC105039813	phenylalanine--tRNA ligase, chloroplastic/mitochondrial, transcript variant X3	protein_coding	XP_010914393.1		343	377	96	88	141	133	58	64	237184450464027	269354976994084	277654375832963	234393332788191	10186310508942	82191697859858	156972657798794	186396221282604	0.9607	0.4757	4162	0.7481	nonDE
105039817	XM_010916100,XM_019848784,XM_029262927	LOC105039817	mediator of DNA damage checkpoint protein 1, transcript variant X2	protein_coding	XP_010914402.1		26	7	44	86	15	15	91	57	179789962450866	0.5001286044983	127258255590108	22906621158846	108365005414277	0.926974036013436	246284687236039	166009134579819	-0.4298	0.2967	2123	0.83	nonDE
105039818	XM_010916101,XM_010916102,XM_029262928	LOC105039818	uncharacterized LOC105039818, transcript variant X3	protein_coding	XP_010914403.1		54	63	148	128	95	82	227	163	373409922013338	45011574404847	428050496075818	340935756782824	686311700957087	506745806354012	614358505522866	474727876079132	-0.6894	1949	3909	0.2072	nonDE
105039821	XM_010916104,XM_010916105	LOC105039821	bifunctional 3-dehydroquinate dehydratase/shikimate dehydrogenase, chloroplastic, transcript variant X1	protein_coding	XP_010914406.1		24	72	484	508	60	40	582	687	165959965339261	514417993198251	139984081149119	135308878473183	433460021657108	24719307627025	157513942825686	200084693783045	-0.4913	0.2122	4468	0.883	nonDE
105039829	XM_010916115,XM_029262929,XM_029262930	LOC105039829	probable protein phosphatase 2C 40, transcript variant X1	protein_coding	XP_010914417.1		41	28	77	90	54	40	76	70	283514940787905	20005144179932	222701947282689	239720453987923	390114019491397	24719307627025	205688310219109	203870867027848	-0.03886	0.0511	2957	0.9726	nonDE
105039830	XM_010916118	LOC105039830	alanine--tRNA ligase 1	protein_coding	XP_010914420.1	.	29	23	111	66	13	35	83	66	200534958118274	164327970049441	321037872056864	175794999591143	0.939163380257066	216293941736468	224633286160343	192221103197685	0.04869	0.04286	2601	0.977	nonDE
105039832	XM_010916122	LOC105039832	40S ribosomal protein S21	protein_coding	XP_010914424.1	.	118	112	257	232	44	0	152	143	815969829584701	800205767197279	743303901969495	617946059168868	317870682548546	0	411376620438219	416479056928318	1459	0.8329	3204	0.5891	nonDE
105039833	XM_010916123	LOC105039833	protein RALF-like 33	protein_coding	XP_010914425.1	.	0	19	87	90	51	14	104	92	0	135749192649538	251624278098623	239720453987923	368441018408541	0.865175766945873	281468213984045	267944568093743	-1284	0.5209	2023	0.7298	nonDE
105039839	XM_010916128,XM_010916129,XM_010916130,XM_010916131	LOC105039839	uncharacterized LOC105039839, transcript variant X1	protein_coding	XP_010914430.1		1016	983	2082	1777	1241	1069	2758	2617	702563853269539	702323454602612	602162927587739	473314718596154	896539811460784	660623496332242	74643205208461	762185798588398	-0.5214	1.85	7755	0.2244	nonDE
105039840	XM_010916133,XM_010916134,XM_010916135,XM_010916137,XM_010916138,XM_019848335,XM_019848338,XM_029262934,XR_002163961,XR_003800003,XR_003800004,XR_003800005,XR_830996,XR_830997	LOC105039840	DNA mismatch repair protein PMS1, transcript variant X14	protein_coding	XP_010914435.1		235	153	202	213	168	86	220	134	16250246606136	109313823554628	58423108248186	567338407771417	12136880606399	531465113981036	595413529581633	390267088310452	0.2754	0.3254	4.55	0.8152	nonDE
105039842	XM_010916141,XM_019848368,XM_029262935,XR_003800007	LOC105039842	ABC transporter C family member 14, transcript variant X4	protein_coding	XP_010914443.1		789	1266	247	182	631	494	370	230	545593386052821	904518304706925	714381571153561	484768029175577	455855456109391	305283449193758	100137729975093	669861420234358	0.004754	0.001682	5.9	0.9997	nonDE
105039844	XM_029262936	LOC105039844	kinesin-like protein KIN-13A	protein_coding	XP_029118769.1	.	234	255	875	1069	418	230	1054	1083	16181096620578	182189705924381	25307039463942	284734628125655	301977148421118	142136018855393	285257209172291	315417355701657	-0.409	0.5102	6195	0.732	nonDE
105039846	XM_010916147,XM_010916148	LOC105039846	auxilin-related protein 2, transcript variant X2	protein_coding	XP_010914449.1		21	21	143	115	34	34	153	169	145214969671854	15003858134949	413589330667851	306309468984568	245627345605694	210114114829712	414083045572681	492202521824376	-0.4235	0.4297	3115	0.7666	nonDE
105039847	XM_019848369	LOC105039847	translationally-controlled tumor protein homolog	protein_coding	XP_019703928.1	.	117	77	409	279	54	91	201	197	809054831028899	550141464948129	118292333037169	743133407362561	390114019491397	562364248514818	543991452026855	573750868635516	0.4366	0.6716	4336	0.6539	nonDE
105039850	XM_010916184,XM_010916255,XM_010916436,XM_010916504,XM_010916575,XR_831032,XR_831038,XR_831042	LOC105039850	protein TIFY 8, transcript variant X3	protein_coding	XP_010914486.1		41	54	100	138	58	0	97	103	283514940787905	385813494898688	289223308159337	367571362781482	419011354268537	0	262523238042811	299981418626691	0.8292	0.3824	2531	0.787	nonDE
105039854	XM_010916158,XM_019848787,XM_019848788,XM_019848789,XM_029262941,XM_029262943	LOC105039854	magnesium/proton exchanger 1, transcript variant X2	protein_coding	XP_010914460.1		49	55	136	177	36	0	249	174	338834929234325	392958189248664	393343699096698	471450226176248	260076012994265	0	67389985848103	50676472661208	0.1503	0.05388	2845	0.9713	nonDE
105039861	XM_010916173	LOC105039861	serine/threonine-protein phosphatase PP1	protein_coding	XP_010914475.1	.	131	94	263	258	117	180	412	411	905864810810134	671601268897717	760657300459055	687198634765379	84524704223136	111236884321612	111504715539833	119701323354922	-0.718	2102	4821	0.1897	nonDE
105039865	XM_010916175,XM_029262945	LOC105039865	U1 small nuclear ribonucleoprotein A, transcript variant X2	protein_coding	XP_010914477.1		23	32	52	96	17	83	79	42	159044966783459	228630219199223	150396120242855	255701817587118	122813672802847	512925633260768	213807585622495	122322520216709	-0.001958	0.001484	2661	0.9997	nonDE
105039866	XM_010916176	LOC105039866	uncharacterized LOC105039866	protein_coding	XP_010914478.1	.	46	79	122	92	42	67	90	70	318089933566917	564430853648081	352852435954391	245047575187654	303422015159975	414048402752668	243578262101577	203870867027848	0.2286	0.351	3327	0.8033	nonDE
105039870	XM_010916182	LOC105039870	60S ribosomal protein L18-3	protein_coding	XP_010914484.1	.	493	554	1297	1058	190	305	806	848	340909428801066	395816066988654	37512263068266	281804711465803	137262340191417	188484720656065	218137865837635	24697499319945	0.5945	1458	6354	0.3341	nonDE
105039876	XM_010916189,XM_019848574	LOC105039876	glycine-rich domain-containing protein 1, transcript variant X2	protein_coding	XP_010914491.1		7	0	91	52	0	0	55	53	0.484049898906179	0	263193210424996	138505151193022	0	0	148853382395408	154359370749656	1.21	0.2285	0.1051	0.8749	nonDE
105039883	XM_010916194,XM_010916195,XR_003800012	LOC105039883	trafficking protein particle complex II-specific subunit 130 homolog, transcript variant X1	protein_coding	XP_010914496.1		728	799	1405	1615	476	532	1259	1241	503411894862426	570861078563059	406358747963868	430165036878328	343878283847972	328766791439432	340738924428762	361433922830799	0.2508	0.8887	6995	0.5604	nonDE
105039888	XM_010916199,XM_010916200,XM_010916201,XM_019848638,XM_029262951	LOC105039888	probable ethylene response sensor 1, transcript variant X5	protein_coding	XP_010914501.1		588	498	342	338	221	211	263	188	40660191508119	35580577862879	989143713904931	900283482754644	159657774643701	130394347732557	711789810363497	547538900017649	0.8125	0.8341	5409	0.5884	nonDE
105039892	XM_010916205	LOC105039892	probable polygalacturonase	protein_coding	XP_010914507.1	.	50	41	130	120	94	75	165	140	345749927790128	292932468349004	375990300607138	319627271983897	679087367262802	463487018006718	446560147186225	407741734055696	-0.6237	1515	3681	0.3197	nonDE
105039896	XM_010916210	LOC105039896	importin subunit alpha-1b	protein_coding	XP_010914512.1	.	676	603	2278	1930	637	688	1939	1700	467453902372252	430825069303535	658850695986969	514067195774101	460190056325963	425172091184829	524775833572175	495114962781917	-0.1319	0.2195	7284	0.8811	nonDE
105039902	XM_010916220,XM_010916222,XM_019847935,XM_029262957	LOC105039902	uncharacterized LOC105039902, transcript variant X3	protein_coding	XP_010914522.1		42	33	106	109	52	35	85	65	290429939343707	235774913549198	306576706648897	290328105385373	375665352102827	216293941736468	230046136429267	189308662240145	0.261	0.4384	3059	0.7621	nonDE
105039912	XM_010916233,XM_019848457,XM_029262958	LOC105039912	protein transport protein SEC13 homolog B, transcript variant X1	protein_coding	XP_010914535.1		99	62	61	102	20	12	48	63	684584857024453	442971049698494	176426217977195	271683181186313	144486673885703	0.741579228810749	129908406454174	183483780325063	0.8708	0.7112	2748	0.6401	nonDE
105039915	XM_010916236	LOC105039915	probable protein disulfide-isomerase A6	protein_coding	XP_010914538.1	.	80	71	289	246	42	42	244	230	553199884464204	507273298848275	835855360580483	655235907566989	303422015159975	259552730083762	66036773280872	669861420234358	0.214	0.2074	4048	0.8859	nonDE
105039920	XM_010916241,XM_010916242,XM_029262959,XM_029262960,XM_029262961,XM_029262962,XM_029262963	LOC105039920	zinc finger matrin-type protein 2, transcript variant X6	protein_coding	XP_010914543.1		116	34	105	69	42	106	62	79	802139832473096	242919607899174	303684473567303	183785681390741	303422015159975	655061652116161	167798358336642	230082835645714	0.08346	0.06706	3.3	0.9622	nonDE
105039921	XM_010916245	LOC105039921	transmembrane protein 205	protein_coding	XP_010914547.1	.	169	102	127	111	56	25	44	59	116863475593063	728758823697522	367313601362358	295655226585105	404562686879967	154495672668906	119082705916327	171834016494901	1527	1829	3364	0.2296	nonDE
105039924	XM_010916249	LOC105039924	GTP-binding protein SAR1A	protein_coding	XP_010914551.1	.	51	39	170	131	49	0	149	120	35266492634593	278643079649053	491679623870872	348926438582421	353992351019971	0	403257345034833	349492914904883	0.6561	0.274	2672	0.8446	nonDE
105039925	XM_010916250	LOC105039925	dihydrolipoyl dehydrogenase 2, chloroplastic	protein_coding	XP_010914552.1	.	267	240	312	679	157	86	173	208	184630461439928	171472664399417	90237672145713	180855764730888	113422039000276	531465113981036	46821154826192	605787719168463	1053	1949	4964	0.2072	nonDE
105039926	XM_029262964	LOC105039926	calreticulin	protein_coding	XP_029118797.1	.	7	29	261	399	13	18	56	132	0.484049898906179	207196136149296	754872834295869	106276067934646	0.939163380257066	111236884321612	15155980752987	384442206395371	1246	0.5122	2808	0.7315	nonDE
105039928	XM_010916252,XM_010916253	LOC105039928	zinc finger CCHC domain-containing protein 10, transcript variant X2	protein_coding	XP_010914554.1		45	41	150	108	48	40	69	101	311174935011115	292932468349004	433834962239005	287664544785507	346768017325686	24719307627025	186743334277876	29415653671161	0.3173	0.4604	3221	0.7534	nonDE
105039929	XM_010916257,XM_010916258,XM_029262965,XM_029262966,XM_029262967,XM_029262968,XM_029262969	LOC105039929	serine/threonine-protein phosphatase 4 regulatory subunit 3, transcript variant X3	protein_coding	XP_010914559.1		239	199	508	602	320	273	769	452	165268465483681	142179417564517	146925440544943	160346348111922	231178678217124	168709274554445	208124092840125	131642331280839	-0.4252	1092	5721	0.4724	nonDE
105039934	XM_019848656	LOC105039934	lon protease homolog, mitochondrial	protein_coding	XP_019704215.1	.	488	542	774	746	136	162	595	414	337451929523165	387242433768683	223858840515327	198701620749989	982509382422777	100113195889451	161032295500487	120575055642184	0.9695	2549	5834	0.1331	nonDE
105039942	XM_010916270,XM_019848596	LOC105039942	uncharacterized LOC105039942, transcript variant X2	protein_coding	XP_010914572.1		107	75	223	162	54	63	266	169	739904845470873	535852076248178	644967977195321	431496817178261	390114019491397	389329095125643	719909085766883	492202521824376	-0.02869	0.03571	4065	0.9809	nonDE
105039945	XM_010916274,XM_010916275,XM_019848775,XM_029262974	LOC105039945	solute carrier family 40 member 2, chloroplastic, transcript variant X1	protein_coding	XP_010914576.1		412	378	186	143	85	101	101	108	284897940499065	270069446429082	537955353176366	380889165780811	614068364014236	62416251758238	273348938580659	314543623414394	1167	0.9199	4455	0.5527	nonDE
105039948	XM_010916280	LOC105039948	dual specificity protein kinase shkD-like	protein_coding	XP_010914582.3	.	78	84	112	111	161	187	156	127	539369887352599	600154325397959	323930105138457	295655226585105	116311772477991	115562763156342	422202320976067	369880001607667	-0.8365	1101	4081	0.4693	nonDE
105039952	XM_010916282,XM_010916283,XM_019848705	LOC105039952	probable protein phosphatase 2C 42, transcript variant X2	protein_coding	XP_010914584.1		31	53	153	208	65	78	221	174	214364955229879	378668800548713	442511661483785	554020604772088	469581690128533	482026498726987	598119954716095	50676472661208	-0.513	0.7441	3802	0.6293	nonDE
105039956	XM_010916290,XM_019848100,XM_019848101,XM_019848102,XM_029262977,XR_002163904	LOC105039956	probable prefoldin subunit 3, transcript variant X1	protein_coding	XP_010914592.1		14	27	83	124	15	42	80	46	0.968099797812357	192906747449344	240055345772249	33028151438336	108365005414277	259552730083762	216514010756957	133972284046872	0.3693	0.3427	2548	0.8069	nonDE
105039957	XM_010916291,XM_019848733	LOC105039957	protein FAR1-RELATED SEQUENCE 5, transcript variant X1	protein_coding	XP_010914593.1		220	225	469	466	253	161	390	320	152129968227656	160755622874453	135645731526729	124121923953747	182775642465414	994952131987754	105550580244017	93198110641302	0.1188	0.2342	5346	0.8702	nonDE
105039960	XM_010916292,XM_010916293,XM_010916294,XM_010916295,XM_010916296,XM_010916298,XM_019848400,XM_019848401,XM_029262978,XM_029262979,XM_029262980,XM_029262981,XM_029262982	LOC105039960	galactokinase, transcript variant X1	protein_coding	XP_010914594.1		518	365	638	836	208	197	552	503	358196925190572	260781343774113	184524470605657	222673666148782	150266140841131	121742590063098	149394667422301	146495780164297	0.5846	1836	5893	0.2269	nonDE
105039969	XM_010916312	LOC105039969	cell division cycle 5-like protein	protein_coding	XP_010914614.1	.	115	183	320	279	113	164	369	362	795224833917293	130747906604555	925514586109877	743133407362561	816349707454219	101349161270802	998670874616466	105430362662973	-0.3078	0.7429	4901	0.6297	nonDE
105039972	XM_010916320	LOC105039972	cell division cycle 5-like protein	protein_coding	XP_010914622.1	.	156	209	497	369	113	149	575	469	10787397747052	149324111914492	14374398415519	982853861350484	816349707454219	920794209106679	155619445231563	136593480908658	-0.1365	0.1898	5219	0.8956	nonDE
105039973	XM_010916321,XR_002164049	LOC105039973	probable pre-mRNA-splicing factor ATP-dependent RNA helicase DEAH2, transcript variant X2	protein_coding	XP_010914623.1	.	617	564	875	750	470	492	957	867	426655410893017	40296076133863	25307039463942	199767044989936	339543683631401	304047483812407	25900488536801	252508631018778	-0.1208	0.2653	6549	0.8531	nonDE
105039975	XM_010916324,XM_010916325	LOC105039975	importin subunit alpha-4, transcript variant X1	protein_coding	XP_010914626.1		187	116	720	676	175	156	446	443	129310472993508	828784544597182	208240781874722	180056696550929	12642583964999	964052997453973	120706560997004	129021134419052	0.106	0.1072	5352	0.9409	nonDE
105039977	XM_010916327,XM_010916329,XM_019848764	LOC105039977	rhodanese-like domain-containing protein 6, transcript variant X1	protein_coding	XP_010914629.1		52	44	109	123	66	102	88	96	359579924901733	314366551398931	315253405893677	327617953783495	476806023822818	630342344489136	238165411832653	279594331923906	-0.1716	0.2137	3485	0.8825	nonDE
105039979	XM_010916331,XM_010916334,XM_019848404	LOC105039979	intermediate cleaving peptidase 55, mitochondrial, transcript variant X1	protein_coding	XP_010914633.1		104	71	125	196	22	0	131	75	719159849803465	507273298848275	361529135199171	522057877573699	158935341274273	0	354541692614518	218433071815552	1611	0.7756	2674	0.6133	nonDE
105039980	XM_010916335,XM_010916336,XM_029262984	LOC105039980	uncharacterized LOC105039980, transcript variant X3	protein_coding	XP_010914637.1		180	199	227	235	139	117	292	215	124469974004446	142179417564517	656536909521694	625936740968465	100418238350563	72303974809048	790276139262894	626174805871248	0.004931	0.006889	4745	0.9967	nonDE
105039982	XM_010916339,XM_010916340	LOC105039982	DUF724 domain-containing protein 6, transcript variant X1	protein_coding	XP_010914641.1		31	35	106	86	33	49	108	128	214364955229879	25006430224915	306576706648897	22906621158846	238403011911409	302811518431056	292293914521892	372792442565208	-0.4228	0.7538	3116	0.625	nonDE
105039984	XM_010916342,XM_010916344,XM_010916345,XM_019848796,XR_831033	LOC105039984	beta-glucosidase-like SFR2, chloroplastic, transcript variant X2	protein_coding	XP_010914644.1		120	99	50	92	167	182	114	44	829799826696306	707324740647595	144611654079668	245047575187654	120646372694562	112472849702964	308532465328664	12814740213179	-0.5662	0.3116	3765	0.8247	nonDE
105039986	XM_010916347	LOC105039986	neutral/alkaline invertase 1, mitochondrial	protein_coding	XP_010914649.1	.	114	116	943	701	669	355	711	865	788309835361491	828784544597182	272737579594254	186715598050593	483307924147675	219383855189846	192426827060246	25192614282727	-1093	1176	5913	0.438	nonDE
105039994	XM_010916352	LOC105039994	transcription factor MYB78	protein_coding	XP_010914654.1	.	0	0	168	93	7	38	394	274	0	0	485895157707685	24771113578752	0.505703358599959	234833422456737	106633150297801	798008822366149	-3116	0.4372	1751	0.7625	nonDE
105039996	XM_010916354	LOC105039996	T-complex protein 1 subunit beta	protein_coding	XP_010914656.1	.	2332	2796	3336	3542	1559	1898	2968	3064	161257766321316	199765654025321	964848956019547	94343316447247	112627362293905	117293114690233	803266979908312	892371909390467	0.2123	0.425	8489	0.7673	nonDE
105039997	XM_010916356,XM_029262989,XM_029262990,XM_029262991	LOC105039997	E3 ubiquitin-protein ligase UPL6, transcript variant X1	protein_coding	XP_010914658.1		532	552	1217	1076	489	440	1342	1249	367877923168696	394387128118659	351984766029913	286599120545561	353269917650543	271912383897274	363202253044796	363763875596832	-0.1577	0.4036	6757	0.7768	nonDE
105039998	XM_010916358,XR_831036	LOC105039998	nuclear export mediator factor NEMF, transcript variant X2	protein_coding	XP_010914660.1	.	702	579	1379	1382	662	767	2628	1471	485432898617339	413677802863593	398838941951725	368104074901455	478250890561675	473992723748203	711248525336605	428420064854235	-0.4977	1492	7188	0.3244	nonDE
105040000	XM_010916360,XM_010916361	LOC105040000	tetratricopeptide repeat protein 1, transcript variant X1	protein_coding	XP_010914662.1		93	72	358	285	45	47	142	181	643094865689637	514417993198251	103541944321043	759114770961756	325095016242831	290451864617543	384312369093599	527151813314865	0.6821	0.9865	4034	0.5165	nonDE
105040006	XM_010916371,XM_010916372	LOC105040006	ADP-ribosylation factor, transcript variant X2	protein_coding	XP_010914673.1		796	653	1528	1584	527	737	1029	845	550433885041883	466548541053414	441933214867466	421907999018744	380722385688826	455453243027935	278491146336136	246101260912188	0.2725	0.684	6958	0.6496	nonDE
105040010	XM_010916376	LOC105040010	probable boron transporter 2	protein_coding	XP_010914678.1	.	146	160	137	219	96	46	171	382	100958978914717	114315109599611	396235932178291	583319771370612	693536034651372	284272037710787	462798697992996	111255244578054	0.01874	0.01394	4338	0.9941	nonDE
105040012	XM_010916381,XM_029263000	LOC105040012	pyrrolidone-carboxylate peptidase, transcript variant X2	protein_coding	XP_010914683.1		126	77	121	144	42	60	149	130	871289818031121	550141464948129	349960202872797	383552726380677	303422015159975	370789614405374	403257345034833	37861732448029	0.1402	0.2093	3763	0.8851	nonDE
105040020	XM_010916393	LOC105040020	dihydrolipoyl dehydrogenase 1, mitochondrial	protein_coding	XP_010914695.1	.	762	775	890	699	372	392	746	895	526922889952154	553713812123117	25740874426181	18618288593062	268745213427407	242249214744845	201899315030863	260663465699892	0.307	0.5226	6512	0.7285	nonDE
105040021	XM_010916394,XM_010916395	LOC105040021	uncharacterized LOC105040021, transcript variant X1	protein_coding	XP_010914696.1		110	53	70	59	48	16	57	41	760649841138281	378668800548713	202456315711536	157150075392083	346768017325686	0.988772305080998	154266232664332	119410079259168	0.547	0.5002	2825	0.7357	nonDE
105040024	XM_010916397	LOC105040024	protein MODIFIER OF SNC1 1	protein_coding	XP_010914699.1	.	294	301	754	639	244	324	901	643	203300957540595	215055299934269	21807437435214	170201522331425	176273742140557	200226391778902	243848904615023	187269953569866	-0.216	0.5721	5989	0.7064	nonDE
105040025	XM_010916400,XM_010916402,XM_010916403,XR_003800028,XR_003800029	LOC105040025	ubiquitin-40S ribosomal protein S27a, transcript variant X2	protein_coding	XP_010914702.1		127	118	163	122	43	43	86	87	878204816586924	843073933297133	471433992299719	324954393183629	31064634885426	265732556990518	232752561563729	25338236330604	0.8991	1693	3639	0.2634	nonDE
105040026	XM_010916404,XM_010916405	LOC105040026	tRNA:m(4)X modification enzyme TRM13 homolog, transcript variant X1	protein_coding	XP_010914706.1		71	64	106	102	31	0	98	49	490964897461981	457260438398445	306576706648897	271683181186313	223954344522839	0	265229663177273	142709606919494	1433	0.7358	2373	0.6308	nonDE
105040027	XM_010916406,XM_019847059,XM_029263005,XM_029263006,XM_029263007	LOC105040027	importin beta-like SAD2, transcript variant X5	protein_coding	XP_010914708.1		54	38	97	131	22	20	93	92	373409922013338	271498385299077	280546608914557	348926438582421	158935341274273	123596538135125	251697537504963	267944568093743	0.2381	0.3155	2972	0.823	nonDE
105040031	XM_010916411,XM_019848620,XM_019848622,XM_019848623,XM_029263008	LOC105040031	protein GFS12, transcript variant X4	protein_coding	XP_010914713.2		226	160	386	298	174	239	392	208	156278967361138	114315109599611	111640196949504	793741058760011	125703406280561	147697863071474	106091865270909	605787719168463	-0.07833	0.1082	5101	0.9408	nonDE
105040034	XM_010916415	LOC105040034	membrane magnesium transporter	protein_coding	XP_010914717.1	.	50	39	113	84	35	0	62	73	345749927790128	278643079649053	32682233822005	223739090388728	252851679299979	0	167798358336642	21260818990047	1237	0.609	2209	0.6859	nonDE
105040050	XM_019848683	LOC105040050	vacuolar protein sorting-associated protein 51 homolog	protein_coding	XP_019704242.1	.	154	64	297	304	103	82	248	255	106490977759359	457260438398445	85899322523323	809722422359206	744106370511368	506745806354012	671193433346568	742672444172876	0.02408	0.02671	4491	0.9874	nonDE
105040073	XM_010916447	LOC105040073	clathrin interactor EPSIN 1	protein_coding	XP_010914749.1	.	152	198	392	474	210	175	430	359	105107978048199	141464948129519	11337553679846	126252772433639	151711007579988	108146970868234	116376280781865	104556630375711	-0.1627	0.3595	5247	0.8009	nonDE
105040081	XM_010916452,XM_010916453,XM_019848332,XM_019848333,XM_029263009	LOC105040081	uncharacterized LOC105040081, transcript variant X5	protein_coding	XP_010914754.1		81	92	152	127	64	45	158	87	560114883020007	657311880197765	439619428402192	338272196182958	462357356434248	278092210804031	427615171244991	25338236330604	0.2652	0.4673	3697	0.7521	nonDE
105040082	XM_010916454	LOC105040082	S-adenosylmethionine synthase	protein_coding	XP_010914756.1	.	780	1139	9245	10141	1792	1755	8564	10764	539369887352599	813780686462233	267386948393307	270111680432392	129460059801589	108455962213572	231778248515323	31349514466968	-0.7188	0.4722	8932	0.7499	nonDE
105040083	XM_010916457	LOC105040083	CRS2-associated factor 2, chloroplastic	protein_coding	XP_010914759.1	.	314	239	90	85	133	133	74	44	2171309546522	170758194964419	260300977343403	226402650988594	960836381339922	82191697859858	200275459950186	12814740213179	0.8631	0.4554	4013	0.7539	nonDE
105040086	XM_029262211	LOC105040086	pleiotropic drug resistance protein 3	protein_coding	XP_029118044.1	.	0	0	234	444	0	0	630	269	0	0	676782541092848	118262090634042	0	0	170504783471104	783446617578445	-0.7111	0.09292	0.9015	0.9492	nonDE
105040087	XM_010916461	LOC105040087	pentatricopeptide repeat-containing protein At3g06430, chloroplastic	protein_coding	XP_010914763.1	.	217	180	57	56	65	47	51	46	150055468660915	128604498299563	164857285650822	149159393592485	469581690128533	290451864617543	13802768185756	133972284046872	1075	0.6042	3365	0.6893	nonDE
105040088	XM_010916462,XM_019848366,XM_029263010	LOC105040088	pto-interacting protein 1, transcript variant X1	protein_coding	XP_010914764.1		185	122	540	558	127	110	692	522	127927473282347	871652710697036	156180586406042	148626681472512	917490379174211	679780959743186	187284619304768	152029417983624	-0.1093	0.09913	5261	0.946	nonDE
105040089	XM_010916465,XM_010916466	LOC105040089	probable receptor-like protein kinase At5g18500, transcript variant X2	protein_coding	XP_010914767.1		98	118	672	626	283	216	568	1125	67766985846865	843073933297133	194358063083074	1667388935516	204448643548269	133484261185935	15372494763744	327649607723327	-0.8548	0.9258	5.57	0.5499	nonDE
105040093	XM_010916471	LOC105040093	uncharacterized LOC105040093	protein_coding	XP_010914773.2	.	85	111	172	192	122	190	275	253	587774877243217	793061072847304	497464090034059	511403635174235	881368710702785	117416711228369	744266911977041	736847562257794	-0.7588	2307	4501	0.1603	nonDE
105040094	XM_010916472,XR_003800035	LOC105040094	uncharacterized LOC105040094, transcript variant X1	protein_coding	XP_010914774.1	.	19	51	122	55	46	66	95	113	131384972560248	364379411848761	352852435954391	14649583299262	332319349937116	407868575845912	257110387773887	329105828202098	-0.5829	0.79	3109	0.6054	nonDE
105040095	XM_010916474	LOC105040095	probable RNA 3'-terminal phosphate cyclase-like protein	protein_coding	XP_010914776.1	.	71	126	168	124	48	38	114	94	490964897461981	900231488096939	485895157707685	33028151438336	346768017325686	234833422456737	308532465328664	273769450008825	0.5551	1018	3617	0.5016	nonDE
105040096	XM_010916475	LOC105040096	suppressor of mec-8 and unc-52 protein homolog 1	protein_coding	XP_010914777.1	.	341	432	702	690	418	342	677	534	235801450752867	308650795918951	203034762327854	183785681390741	301977148421118	211350080211063	183224981603075	155524347132673	-0.05604	0.1027	6103	0.9444	nonDE
105040098	XM_010916477	LOC105040098	CBL-interacting protein kinase 1	protein_coding	XP_010914779.1	.	533	481	915	964	1540	1554	1217	1102	368569423024276	343659798233832	264639326965793	256767241827064	111254738891991	960345101309919	329371938864021	320950993520984	-1268	2015	7055	0.1972	nonDE
105040099	XM_010916478,XR_003800036	LOC105040099	anaphase-promoting complex subunit 4, transcript variant X1	protein_coding	XP_010914780.1	.	33	61	122	84	47	33	125	92	228194952341484	435826355348518	352852435954391	223739090388728	339543683631401	203934287922956	338303141807746	267944568093743	-0.1736	0.2377	3207	0.8673	nonDE
105040101	XM_010916480	LOC105040101	protein CHUP1, chloroplastic	protein_coding	XP_010914782.1	.	50	41	120	139	42	47	168	190	345749927790128	292932468349004	347067969791204	370234923381348	303422015159975	290451864617543	45467942258961	553363781932731	-0.4346	0.6826	3523	0.6496	nonDE
105040103	XM_010916485	LOC105040103	ATP-dependent 6-phosphofructokinase 3	protein_coding	XP_010914787.1	.	361	256	484	630	109	101	355	430	249631447864472	182904175359378	139984081149119	167804317791546	787452372677079	62416251758238	960780922733998	12523496117425	0.767	1727	5319	0.2552	nonDE
105040104	XM_010916482,XR_003800037	LOC105040104	protein transport protein SEC23, transcript variant X2	protein_coding	XP_010914784.1	.	502	501	787	793	408	419	880	842	347132927501288	357949186933783	227618743521398	211220355569359	294752814726833	258934747393086	238165411832653	245227528624926	-0.1088	0.3037	6406	0.8285	nonDE
105040105	XM_010916483,XR_002163686	LOC105040105	protein translocase subunit SECA1, chloroplastic, transcript variant X2	protein_coding	XP_010914785.1	.	1059	1137	332	289	455	638	275	235	73229834705949	812351747592238	960221383088998	769769013361219	328707183089973	394272956651048	744266911977041	684423625022062	0.5482	0.2606	6007	0.8581	nonDE
105040109	XM_010916489,XM_029263019	LOC105040109	guanosine deaminase, transcript variant X2	protein_coding	XP_010914791.1		34	51	195	141	46	69	124	217	235109950897287	364379411848761	563985450910706	375562044581079	332319349937116	42640805656618	335596716673284	631999687786329	-0.2877	0.3178	3638	0.8205	nonDE
105040121	XM_010916509	LOC105040121	mitochondrial-processing peptidase subunit alpha	protein_coding	XP_010914811.1	.	800	751	1501	1444	356	388	1072	1030	553199884464204	536566545683176	434124185547164	384618150620623	25718627951655	239777283982142	290128774414323	299981418626691	0.5873	2189	6821	0.1755	nonDE
105040123	XM_010916510,XM_019848379	LOC105040123	mediator of RNA polymerase II transcription subunit 13, transcript variant X1	protein_coding	XP_010914812.1		506	449	695	689	427	566	1066	846	349898926923609	320796776313909	201010199170739	183519325330754	308479048745975	349778202922403	288504919333646	246392505007942	-0.4416	1454	6438	0.3351	nonDE
105040125	XM_010916513,XM_010916514,XM_010916515	LOC105040125	flap endonuclease 1, transcript variant X3	protein_coding	XP_010914815.1		221	207	418	373	140	177	350	361	152821468083236	147895173044497	120895342810603	993508103749947	101140671719992	109382936249585	947248797061688	105139118567219	0.1015	0.2842	5183	0.8378	nonDE
105040130	XM_010916519,XM_010916520	LOC105040130	nuclear pore complex protein NUP98A, transcript variant X1	protein_coding	XP_010914821.1		356	283	250	218	108	142	200	208	246173948586571	202194850104313	723058270398342	580656210770747	780228038982794	877535420759386	541285026892393	605787719168463	0.5408	0.6625	4.85	0.6564	nonDE
105040131	XM_010916521	LOC105040131	microtubule-associated protein 70-1	protein_coding	XP_010914823.1	.	14	27	111	191	48	60	88	94	0.968099797812357	192906747449344	321037872056864	50874007457437	346768017325686	370789614405374	238165411832653	273769450008825	0.166	0.1412	3092	0.9222	nonDE
105040132	XM_010916525,XM_010916527,XM_010916528	LOC105040132	phytochrome A, transcript variant X3	protein_coding	XP_010914827.1		88	80	1203	1206	431	296	929	993	608519872910624	571575547998057	347935639715682	321225408343817	311368782223689	182922876439985	251426894991517	28920538708379	-0.9147	0.6366	5902	0.672	nonDE
105040133	XM_029263027	LOC105040133	glutamate--tRNA ligase, cytoplasmic	protein_coding	XP_029118860.1	.	378	302	881	748	211	365	645	500	261386945409336	215769769369266	254805734488376	199234332869963	152433440949416	225563682096603	174564421172797	145622047877034	0.2192	0.5484	5981	0.7166	nonDE
105040135	XM_010916534	LOC105040135	DEAD-box ATP-dependent RNA helicase 50	protein_coding	XP_010914836.1	.	178	215	96	113	87	52	88	71	123086974293285	153610928524478	277654375832963	300982347784836	628517031402806	321350999151324	238165411832653	206783307985389	0.887	0.77	3826	0.6161	nonDE
105040139	XM_010916539,XM_029263031,XR_831053	LOC105040139	glucose-1-phosphate adenylyltransferase large subunit 4, chloroplastic/amyloplastic, transcript variant X1	protein_coding	XP_010914841.1		160	182	206	130	84	92	140	74	110639976892841	130033437169558	595800014808233	346262877982555	606844030319951	568544075421574	378899518824675	215520630858011	0.6806	0.8478	4126	0.5845	nonDE
105040142	XM_010916542	LOC105040142	2-methoxy-6-polyprenyl-1,4-benzoquinol methylase, mitochondrial	protein_coding	XP_010914844.1	.	69	99	110	70	61	90	111	68	477134900350376	707324740647595	31814563897527	186449241990607	440684355351393	556184421608061	300413189925278	198045985112767	-0.06679	0.06062	3524	0.967	nonDE
105040159	XM_010916562	LOC105040159	embryo-specific protein ATS3B	protein_coding	XP_010914864.1	.	26	0	165	100	9	14	76	59	179789962450866	0	477218458462905	266356059986581	0.650190032485661	0.865175766945873	205688310219109	171834016494901	-0.02667	0.007464	1772	0.9963	nonDE
105040164	XM_010916572,XM_010916579,XR_831075	LOC105040164	endoribonuclease YBEY, chloroplastic, transcript variant X1	protein_coding	XP_010914874.1		74	107	85	63	39	48	92	79	511709893129389	764482295447401	245839811935436	167804317791546	28174901407712	296631691524299	248991112370501	230082835645714	0.02789	0.02481	3286	0.9886	nonDE
105040167	gene-LOC105040167	LOC105040167	.	pseudogene	.	.	528	426	665	630	287	533	844	659	365111923746375	304363979308965	192333499925959	167804317791546	207338377025983	329384774130108	22842228134859	191929859101931	-0.1558	0.2957	6243	0.8307	nonDE
105040172	XM_010916578	LOC105040172	uncharacterized protein At2g34160	protein_coding	XP_010914880.1	.	217	195	450	371	118	189	272	252	150055468660915	139321539824526	130150488671701	988180982550215	852471375925645	116798728537693	736147636573655	733935121300253	0.3886	1184	5053	0.4349	nonDE
105040174	XM_010916583	LOC105040174	F-box/kelch-repeat protein At1g55270	protein_coding	XP_010914885.1	.	42	60	152	111	15	56	168	194	290429939343707	428681660998542	439619428402192	295655226585105	108365005414277	346070306778349	45467942258961	565013545762894	-0.3968	0.4292	3416	0.7667	nonDE
105040176	XM_010916587	LOC105040176	uncharacterized LOC105040176	protein_coding	XP_010914889.1	.	0	0	448	457	11	0	885	884	0	0	129572042055383	121724719413868	0.794676706371364	0	239518624399884	257459780646597	-2664	0.3254	1865	0.8152	nonDE
105040177	XM_010916588	LOC105040177	probable cellulose synthase A catalytic subunit 1 [UDP-forming]	protein_coding	XP_010914890.1	.	1870	2805	5426	5615	4332	3166	4930	7119	129310472993508	200408676516819	156932567007256	149558927682465	312958135636432	195653319867902	133426759128975	207336671767322	-0.6727	1268	9141	0.4099	nonDE
105040178	XM_010916589	LOC105040178	ABC transporter C family member 3	protein_coding	XP_010914891.1	.	121	127	154	129	47	42	313	307	836714825252109	907376182446915	445403894565378	343599317382689	339543683631401	259552730083762	847111067086596	894119373964991	-0.2311	0.1945	4114	0.8932	nonDE
105040179	XM_029263082	LOC105040179	ABC transporter C family member 3-like	protein_coding	XP_029118915.1	.	86	128	131	109	43	88	274	252	594689875799019	914520876796891	378882533688731	290328105385373	31064634885426	543824767794549	741560486842579	733935121300253	-0.5308	0.7109	4052	0.6401	nonDE
105040183	XM_010916594,XM_010916596	LOC105040183	protein OVEREXPRESSOR OF CATIONIC PEROXIDASE 3, transcript variant X2	protein_coding	XP_010914896.1		186	209	80	90	108	130	132	75	128618973137927	149324111914492	231378646527469	239720453987923	780228038982794	803377497878311	35724811774898	218433071815552	0.04075	0.02138	4041	0.9902	nonDE
105040185	XM_010916599	LOC105040185	NADH-cytochrome b5 reductase-like protein	protein_coding	XP_010914901.1	.	238	156	659	634	135	169	450	332	164576965628101	111457231859621	190598160077003	168869742031492	975285048728492	10443907472418	121789131050788	966930397903509	0.3773	0.7184	5339	0.6368	nonDE
105040189	XM_010916608,XR_003800869	LOC105040189	mitogen-activated protein kinase kinase 1, transcript variant X2	protein_coding	XP_010914910.1	.	201	147	466	553	210	261	542	565	138991470971631	105027006944643	134778061602251	147294901172579	151711007579988	161293482266338	146688242287839	164552914101049	-0.443	1143	5498	0.4536	nonDE
105040193	XM_010916614,XR_003800106	LOC105040193	monothiol glutaredoxin-S4, mitochondrial, transcript variant X2	protein_coding	XP_010914916.1	.	142	41	61	126	43	83	77	76	981929794923962	292932468349004	176426217977195	335608635583092	31064634885426	512925633260768	208394735353571	221345512773092	0.1773	0.1459	3373	0.9202	nonDE
105040194	XM_010916616,XM_019848922,XM_029263087	LOC105040194	CRC domain-containing protein TSO1, transcript variant X2	protein_coding	XP_010914918.1		0	16	109	110	9	6	106	159	0	114315109599611	315253405893677	292991665985239	0.650190032485661	0.370789614405374	286881064252968	463078112248969	-1038	0.3185	1722	0.8202	nonDE
105040196	XM_010916617	LOC105040196	acyl-protein thioesterase 2	protein_coding	XP_010914919.1	.	669	415	453	490	190	317	360	309	462613403383191	296504815523992	131018158596179	130514469393425	137262340191417	195900512944173	974313048406308	899944255880073	0.6294	0.8835	5709	0.5641	nonDE
105040198	XM_010916618,XM_010916619	LOC105040198	peptidyl-prolyl cis-trans isomerase CYP95, transcript variant X2	protein_coding	XP_010914920.1		345	440	699	652	236	307	640	598	238567450175188	314366551398931	202167092403376	173664151111251	170494275185129	189720686037417	173211208605566	174163969260933	0.1348	0.3771	5985	0.7881	nonDE
105040199	XM_010916621,XM_010916622,XM_010916623,XM_010916624,XM_019849466,XM_029263088,XM_029263089,XM_029263090,XR_003800107,XR_003800108,XR_003800109,XR_831076	LOC105040199	(6-4)DNA photolyase, transcript variant X9	protein_coding	XP_010914923.1		487	464	118	94	94	127	91	76	336760429667584	331513817838873	341283503628017	250374696387386	679087367262802	784838017158042	246284687236039	221345512773092	1042	0.5294	4342	0.724	nonDE
105040203	XM_010916627	LOC105040203	GTP-binding nuclear protein Ran1B	protein_coding	XP_010914929.1	.	1356	1232	1762	1668	433	651	1214	1300	937673804166826	880226343917007	509611468976751	444281908057617	312813648962546	402306731629831	328560011323683	378617324480289	0.725	2133	7253	0.1838	nonDE
105040206	XM_010916631	LOC105040206	boron transporter 4	protein_coding	XP_010914933.1	.	0	0	42	49	2	0	54	116	0	0	121473789426921	130514469393425	0.144486673885703	0	146146957260946	33784315107472	-1764	0.3371	-0.1049	0.8109	nonDE
105040207	XM_010916632,XM_010916633,XM_019849553	LOC105040207	probable 1-deoxy-D-xylulose-5-phosphate synthase, chloroplastic, transcript variant X3	protein_coding	XP_010914934.1		501	292	539	587	255	330	509	371	346441427645708	208625075019291	155891363097882	156351007212123	184220509204271	203934287922956	137757039344114	10805155952476	0.2158	0.3875	5813	0.7842	nonDE
105040208	XM_010916634,XM_010916635,XM_019848805,XM_029263091	LOC105040208	protein FAR1-RELATED SEQUENCE 5, transcript variant X4	protein_coding	XP_010914936.1		96	143	235	269	132	104	327	224	663839861357045	102169129204653	679674774174441	716497801363903	953612047645637	642701998302649	885001018969063	652386774489114	-0.2361	0.5063	4.6	0.7342	nonDE
105040209	XM_010916637	LOC105040209	26S proteasome regulatory subunit 8 homolog A	protein_coding	XP_010914939.2	.	425	351	910	833	340	165	554	554	293887438621608	250778771684147	263193210424996	221874597968822	245627345605694	101967143961478	149935952449193	161349229047754	0.4967	1084	5988	0.4749	nonDE
105040210	XM_010916638	LOC105040210	serine-threonine kinase receptor-associated protein	protein_coding	XP_010914940.1	.	129	179	327	335	76	172	302	334	892034813698529	127890028864565	945760217681031	892292800955046	54904936076567	106293022796207	817340390607514	97275527981859	0.02224	0.03128	4842	0.9852	nonDE
105040211	XM_010916642	LOC105040211	derlin-1	protein_coding	XP_010914944.1	.	88	63	64	121	64	0	129	68	608519872910624	45011574404847	185102917221975	322290832583763	462357356434248	0	349128842345594	198045985112767	0.7616	0.299	2586	0.8292	nonDE
105040213	XM_010916640	LOC105040213	3-ketoacyl-CoA synthase 11	protein_coding	XP_010914942.1	.	9	26	45	55	16	33	54	86	0.62234987002223	185762053099368	130150488671701	14649583299262	115589339108562	203934287922956	146146957260946	250469922348499	-0.6198	0.5456	2.22	0.7183	nonDE
105040227	XM_010916652,XM_010916653	LOC105040227	protein FAR1-RELATED SEQUENCE 5, transcript variant X1	protein_coding	XP_010914954.1		208	192	214	200	80	143	228	279	143831969960693	137178131519534	61893787946098	532712119973162	57794669554281	883715247666142	617064930657328	812571027153852	0.04422	0.05251	4664	0.9715	nonDE
105040228	XM_010916654,XM_010916655	LOC105040228	V-type proton ATPase subunit c''1, transcript variant X2	protein_coding	XP_010914956.1		54	48	161	197	97	62	124	139	373409922013338	342945328798834	465649526136532	524721438173564	700760368345657	383149268218887	335596716673284	404829293098156	-0.1029	0.125	3769	0.9317	nonDE
105040229	XM_010916657,XM_029263092,XM_029263093,XM_029263094,XM_029263095,XM_029263096,XM_029263097	LOC105040229	GDP-fucose transporter 1, transcript variant X1	protein_coding	XP_010914959.2		18	28	70	106	34	49	100	107	124469974004446	20005144179932	202456315711536	282337423585776	245627345605694	302811518431056	270642513446197	311631182456854	-0.4874	0.7317	2903	0.6325	nonDE
105040231	XM_010916659	LOC105040231	plastidic ATP/ADP-transporter	protein_coding	XP_010914961.1	.	0	51	261	121	18	0	43	58	0	364379411848761	754872834295869	322290832583763	130038006497132	0	116376280781865	16892157553736	1.65	0.3307	1417	0.8141	nonDE
105040234	XM_010916662	LOC105040234	protein argonaute PNH1	protein_coding	XP_010914964.1	.	40	22	114	111	15	6	134	137	276599942232102	157183275699466	329714571301644	295655226585105	108365005414277	0.370789614405374	362660968017904	399004411183074	-0.1073	0.06766	2684	0.9616	nonDE
105040236	XM_010916664	LOC105040236	uncharacterized LOC105040236	protein_coding	XP_010914966.1	.	14	14	160	122	17	30	67	159	0.968099797812357	10002572089966	462757293054939	324954393183629	122813672802847	185394807202687	181330484008952	463078112248969	0.1381	0.08205	2.7	0.9561	nonDE
105040238	XM_029263099	LOC105040238	ras-related protein RABA5a	protein_coding	XP_029118932.1	.	41	49	75	77	35	0	46	62	283514940787905	35009002314881	216917481119502	205094166189667	252851679299979	0	12449555618525	180571339367523	1219	0.6138	2043	0.6853	nonDE
105040239	XM_010916671,XM_010916672,XM_019848957	LOC105040239	ABC transporter G family member 36, transcript variant X1	protein_coding	XP_010914973.1		49	128	486	701	359	248	2802	3065	338834929234325	914520876796891	140562527765438	186715598050593	259353579624836	153259707287555	758340322676243	892663153486221	-2087	1585	5958	0.2973	nonDE
105040240	XM_010916673	LOC105040240	ABC transporter G family member 39	protein_coding	XP_010914975.1	.	275	546	1535	1396	1251	2309	3961	3707	19016246028457	390100311508674	443957778024582	371833059741267	903764145155069	142692203277002	107201499576039	107964186296033	-1943	3097	7584	0.09956	nonDE
105040241	XM_010916674	LOC105040241	probable protein phosphatase 2C 57	protein_coding	XP_010914976.1	.	36	23	133	116	43	33	113	108	248939948008892	164327970049441	384666999851918	308973029584434	31064634885426	203934287922956	305826040194202	314543623414394	-0.06102	0.06563	3117	0.9635	nonDE
105040243	XM_010916677,XM_019849378	LOC105040243	transcriptional corepressor LEUNIG, transcript variant X1	protein_coding	XP_010914979.2		582	515	728	598	240	385	802	580	402452915947708	367951759023749	210554568339997	159280923871975	173384008662843	237923335910115	21705529578385	16892157553736	0.2044	0.379	6178	0.7881	nonDE
105040245	XM_010916678,XM_010916679,XM_010916680,XM_010916682,XM_010916686,XM_019849557,XM_019849558,XM_019849559,XM_029263101,XM_029263102,XM_029263103,XM_029263104	LOC105040245	coiled-coil domain-containing protein 93, transcript variant X10	protein_coding	XP_010914980.1		32	38	70	87	37	0	85	63	221279953785682	271498385299077	202456315711536	231729772188325	26730034668855	0	230046136429267	183483780325063	0.7905	0.3552	2085	0.8017	nonDE
105040248	XM_010916690,XM_029263106,XM_029263107,XM_029263108	LOC105040248	aromatic aminotransferase ISS1, transcript variant X1	protein_coding	XP_010914992.1		43	51	126	100	31	0	92	111	29734493789951	364379411848761	364421368280764	266356059986581	223954344522839	0	248991112370501	323280946287016	0.9375	0.4335	2405	0.7634	nonDE
105040249	XM_010916692,XM_010916693,XM_010916694,XM_019849495,XM_029263109,XM_029263110,XM_029263111,XM_029263112,XM_029263113,XM_029263114,XM_029263115,XM_029263116,XM_029263117	LOC105040249	uncharacterized LOC105040249, transcript variant X9	protein_coding	XP_010914994.1		146	138	184	215	122	58	301	158	100958978914717	985967820296648	532170887013179	572665528971149	881368710702785	358429960591862	814633965473052	460165671291429	0.06794	0.07768	4388	0.9586	nonDE
105040257	XM_010916712,XM_010916714	LOC105040257	palmitoyl-acyl carrier protein thioesterase, chloroplastic, transcript variant X2	protein_coding	XP_010915014.1		463	477	255	184	351	566	286	239	320164433133658	340801920493841	737519435806308	490095150375309	253574112669408	349778202922403	774037588456122	696073388852224	-0.2916	0.1623	5515	0.9093	nonDE
105040258	XM_029263120,XM_029263121,XM_029263122,XM_029263123,XM_029263124	LOC105040258	E3 ubiquitin-protein ligase At1g12760-like, transcript variant X2	protein_coding	XP_029118953.1		60	70	58	68	35	53	55	73	414899913348153	5001286044983	167749518732415	181122120790875	252851679299979	327530826058081	148853382395408	21260818990047	0.01677	0.01616	3.01	0.993	nonDE
105040260	XM_010916719,XM_010916720,XM_029263125	LOC105040260	uncharacterized LOC105040260, transcript variant X1	protein_coding	XP_010915021.1		398	424	332	324	340	502	546	468	275216942520942	30293504043897	960221383088998	862993634356522	245627345605694	310227310719163	147770812341623	136302236812904	-0.5342	0.67	5826	0.6549	nonDE
105040265	XM_010916721	LOC105040265	acyl transferase 9	protein_coding	XP_010915023.1	.	51	102	367	429	180	209	365	717	35266492634593	728758823697522	106144954094477	114266749734243	130038006497132	129158382351205	987845174078618	208822016655667	-0.981	1183	5001	0.4355	nonDE
105040266	XM_010916722	LOC105040266	syntaxin-32	protein_coding	XP_010915024.1	.	155	184	524	370	147	218	382	453	10718247761494	131462376039553	151553013475492	98551742195035	106197705305991	134720226567286	103385440136447	131933575376593	-0.1711	0.3333	5241	0.8128	nonDE
105040267	XM_010916724	LOC105040267	46 kDa FK506-binding nuclear protein	protein_coding	XP_010915026.1	.	281	236	340	255	129	133	328	343	194311459418052	168614786659427	983359247741744	679207952965781	931939046562781	82191697859858	887707444103525	998967248436456	0.1451	0.2241	5058	0.879	nonDE
105040272	XM_010916727,XM_010916728,XM_010916729,XM_010916731,XM_019849496,XM_019849498,XM_029263126	LOC105040272	3-hydroxyisobutyryl-CoA hydrolase-like protein 3, mitochondrial, transcript variant X2	protein_coding	XP_010915029.1		101	35	125	95	32	15	90	56	698414854136058	25006430224915	361529135199171	253038256987252	231178678217124	0.926974036013436	243578262101577	163096693622279	0.6072	0.7218	2979	0.636	nonDE
105040273	XM_029264521,XM_029264523,XM_029264525,XR_003800861	LOC105040273	probable glutamate carboxypeptidase LAMP1, transcript variant X4	protein_coding	XP_029120354.1		70	58	182	308	151	120	240	171	484049898906179	414392272298591	526386420849993	820376664758669	109087438783705	741579228810749	649542032270872	498027403739458	-0.4916	0.7294	4306	0.6331	nonDE
105040274	XM_010916732	LOC105040274	uncharacterized LOC105040274	protein_coding	XP_010915034.3	.	231	305	388	354	193	244	429	368	159736466639039	217913177674259	112218643565823	942900452352497	139429640299703	150787776524852	116105638268418	107177827237497	-0.103	0.2006	5394	0.89	nonDE
105040275	XM_010916733	LOC105040275	uncharacterized LOC105040275	protein_coding	XP_010915035.1	.	36	119	379	379	42	25	448	552	248939948008892	850218627647109	109615633792389	100948946734914	303422015159975	154495672668906	121247846023896	160766740856246	-0.001391	0.0005528	4299	0.9997	nonDE
105040278	XM_010916737	LOC105040278	UDP-galactose/UDP-glucose transporter 3	protein_coding	XP_010915039.1	.	165	192	72	84	12	41	56	60	114097476170742	137178131519534	208240781874722	223739090388728	0.866920043314215	253372903177006	15155980752987	174746457452441	1263	0.6791	3183	0.6502	nonDE
105040279	XM_010916738,XM_029263129,XM_029263130	LOC105040279	probable ADP-ribosylation factor GTPase-activating protein AGD14, transcript variant X1	protein_coding	XP_010915040.1		0	21	376	224	46	57	172	225	0	15003858134949	108747963867911	596637574369941	332319349937116	352250133685106	465505123127458	655299215446655	-0.4809	0.1673	2949	0.9085	nonDE
105040281	XM_010916740,XM_010916741,XM_019849502	LOC105040281	nuclear pore complex protein NUP50A, transcript variant X3	protein_coding	XP_010915042.1		83	123	212	168	106	62	191	132	573944880131612	878797405047012	613153413297794	447478180777456	765779371594223	383149268218887	516927200682236	384442206395371	0.1181	0.1788	4.12	0.9009	nonDE
105040282	XM_010916743,XM_029263131,XM_029263132	LOC105040282	MAR-binding filament-like protein 1, transcript variant X3	protein_coding	XP_010915045.1		62	59	76	76	91	159	89	74	428729910459758	421536966648567	219809714201096	202430605589802	657414366179946	982592478174242	240871836967115	215520630858011	-0.6912	0.6729	3.51	0.6539	nonDE
105040287	XM_010916752	LOC105040287	heat shock 70 kDa protein 14	protein_coding	XP_010915054.1	.	535	442	739	499	105	156	384	381	369952422735436	315795490268926	21373602472975	132911673933304	758555037899938	964052997453973	10392672516334	1109640004823	1.06	2399	5586	0.1524	nonDE
105040289	XM_010916754,XM_019848977	LOC105040289	V-type proton ATPase subunit F, transcript variant X1	protein_coding	XP_010915056.1		59	45	94	130	34	15	74	120	40798491479235	321511245748907	271869909669776	346262877982555	245627345605694	0.926974036013436	200275459950186	349492914904883	0.2633	0.3107	3044	0.8247	nonDE
105040293	XM_010916763,XR_003800119	LOC105040293	uncharacterized LOC105040293, transcript variant X1	protein_coding	XP_010915065.1	.	25	49	181	175	14	24	237	123	172874963895064	35009002314881	523494187768399	466123104976517	101140671719992	14831584576215	641422756867486	358230237777505	-0.1707	0.1124	3218	0.9392	nonDE
105040294	XM_010916764	LOC105040294	protein GIGANTEA	protein_coding	XP_010915066.1	.	10051	7729	7422	6049	2899	3824	4207	4269	695026504843714	552213426309622	21466153931586	161118780685883	209433433797326	236316580914359	113859305406815	124332104477412	0.8928	1197	9538	0.4325	nonDE
105040299	XM_010916768	LOC105040299	ATP synthase subunit d, mitochondrial	protein_coding	XP_010915070.1	.	26	73	72	136	42	0	51	52	179789962450866	521562687548227	208240781874722	36224424158175	303422015159975	0	13802768185756	151446929792116	1496	0.6102	2147	0.6854	nonDE
105040300	XM_010916769	LOC105040300	S-adenosylmethionine carrier 1, chloroplastic/mitochondrial	protein_coding	XP_010915071.1	.	399	387	191	179	88	185	114	141	275908442376522	27649967134406	552416518584333	47677734737598	635741365097091	11432679777499	308532465328664	410654175013237	0.8697	0.6909	4683	0.6472	nonDE
105040302	XM_010916772,XM_019848996,XM_019848997,XM_019848998	LOC105040302	probable choline kinase 2, transcript variant X3	protein_coding	XP_010915074.1		31	40	88	77	39	84	88	72	214364955229879	285787773999028	254516511180216	205094166189667	28174901407712	519105460167524	238165411832653	20969574894293	-0.259	0.3803	3073	0.788	nonDE
105040307	XM_010916779,XM_010916780	LOC105040307	DEAD-box ATP-dependent RNA helicase 39, transcript variant X1	protein_coding	XP_010915081.2		212	180	152	150	112	116	94	62	146597969383014	128604498299563	439619428402192	399534089979871	809125373759934	716859921183724	254403962639425	180571339367523	0.848	0.8226	4136	0.5935	nonDE
105040308	XM_010916781	LOC105040308	polyadenylate-binding protein 3	protein_coding	XP_010915083.1	.	801	799	3463	2987	778	731	2951	2146	553891384319784	570861078563059	100158031615578	795605551179917	562053161415383	451745346883881	798666057179726	625009829488232	-0.0004389	0.0004464	7684	0.9998	nonDE
105040309	XM_010916782	LOC105040309	translation factor GUF1 homolog, mitochondrial	protein_coding	XP_010915084.1	.	186	183	249	298	108	129	318	273	128618973137927	130747906604555	720166037316748	793741058760011	780228038982794	797197670971555	860643192758905	795096381408608	0.03399	0.06501	4826	0.9642	nonDE
105040310	XM_010916784,XM_010916785,XM_010916786,XM_010916788	LOC105040310	ubiquitin-conjugating enzyme E2 2, transcript variant X1	protein_coding	XP_010915086.1		394	365	854	560	278	378	410	448	272450943098621	260781343774113	246996705168073	149159393592485	200836476701127	233597457075386	110963430512941	130477354897823	0.3039	0.5859	5919	0.6992	nonDE
105040311	XM_010916789	LOC105040311	probable LRR receptor-like serine/threonine-protein kinase At1g14390	protein_coding	XP_010915091.1	.	0	0	72	57	23	7	167	202	0	0	208240781874722	151822954192351	166159674968558	0.432587883472937	451972997455148	588313073423219	-3603	0.7246	1213	0.6353	nonDE
105040312	XM_010916790,XM_010916791,XM_010916792,XM_010916793,XM_010916794,XM_019849381	LOC105040312	protein IQ-DOMAIN 31, transcript variant X1	protein_coding	XP_010915092.1		31	42	106	138	33	32	127	174	214364955229879	30007716269898	306576706648897	367571362781482	238403011911409	1977544610162	34371599207667	50676472661208	-0.3372	0.3953	3242	0.7793	nonDE
105040316	XM_010916798	LOC105040316	small GTPase LIP1	protein_coding	XP_010915100.1	.	47	54	99	73	32	61	63	88	32500493212272	385813494898688	286331075077743	194439923790204	231178678217124	376969441312131	170504783471104	256294804263581	0.06558	0.07843	3095	0.958	nonDE
105040318	XM_010916801,XM_010916804,XM_019849254,XM_019849255,XM_019849256,XM_019849257,XM_019849258,XM_019849259,XM_029263138,XM_029263140	LOC105040318	probable serine/threonine-protein kinase PIX7, transcript variant X8	protein_coding	XP_010915103.1		139	173	140	193	92	87	135	156	961184799256555	12360321225458	404912631423071	514067195774101	664638699874232	537644940887793	365367393152366	454340789376347	0.2801	0.3964	4227	0.7793	nonDE
105040320	XM_010916806,XM_010916807	LOC105040320	uncharacterized LOC105040320, transcript variant X1	protein_coding	XP_010915108.1		226	196	258	265	86	73	117	121	156278967361138	140036009259524	746196135051088	70584355896444	621292697708521	451127364193205	31665174073205	352405355862423	1129	2536	4389	0.1331	nonDE
105040321	XM_010916809	LOC105040321	phosducin-like protein 3	protein_coding	XP_010915111.1	.	201	147	394	348	70	137	319	169	138991470971631	105027006944643	113953983414779	926919088753302	505703358599959	846636286225605	863349617893367	492202521824376	0.5437	1264	4758	0.4118	nonDE
105040322	XM_010916810,XM_029263142	LOC105040322	FACT complex subunit SSRP1-A, transcript variant X1	protein_coding	XP_010915112.1		193	158	273	247	104	58	162	144	133459472126989	112886170729616	789579631274989	657899468166855	751330704205653	358429960591862	438440871782839	419391497885859	0.7869	1931	4402	0.2105	nonDE
105040325	XM_010916813,XM_010916814,XM_010916817,XM_029263145,XR_003800120	LOC105040325	tRNase Z TRZ1, transcript variant X3	protein_coding	XP_010915115.1		24	43	76	56	15	34	62	44	165959965339261	307221857048955	219809714201096	149159393592485	108365005414277	210114114829712	167798358336642	12814740213179	0.1763	0.1833	2476	0.8977	nonDE
105040326	gene-LOC105040326	LOC105040326	.	pseudogene	.	.	135	85	196	172	75	54	177	244	933524805033344	607299019747935	5668776839923	458132423176919	541825027071384	333710652964837	479037248799768	710635593639928	0.04338	0.05373	4141	0.9713	nonDE
105040328	XM_010916818	LOC105040328	uncharacterized LOC105040328	protein_coding	XP_010915120.1	.	250	221	319	466	121	85	305	295	172874963895064	157897745134463	922622353028284	124121923953747	8741443770085	52528528707428	8254596660109	859170082474503	0.5531	1311	4.99	0.3905	nonDE
105040349	XM_019849507,XR_002164364,XR_002164365	LOC105040349	type I inositol polyphosphate 5-phosphatase 1, transcript variant X1	protein_coding	XP_019705066.1	.	0	0	79	67	9	0	131	74	0	0	228486413445876	178458560191009	0.650190032485661	0	354541692614518	215520630858011	-1673	0.3123	0.383	0.8247	nonDE
105040359	XM_010916839,XM_019849429	LOC105040359	glutamine--tRNA ligase, transcript variant X1	protein_coding	XP_010915141.1		149	128	97	86	51	9	215	152	103033478481458	914520876796891	280546608914557	22906621158846	368441018408541	0.556184421608061	581881403909323	442691025546185	-0.04167	0.02196	3547	0.9899	nonDE
105040362	XM_010916849	LOC105040362	uncharacterized LOC105040362	protein_coding	XP_010915151.1	.	91	71	121	150	58	42	208	129	629264868578032	507273298848275	349960202872797	399534089979871	419011354268537	259552730083762	562936427968089	375704883522749	-0.07889	0.1035	3.75	0.9443	nonDE
105040368	XM_010916856	LOC105040368	histone deacetylase 1	protein_coding	XP_010915158.1	.	100	201	267	266	58	88	171	183	691499855580255	143608356434512	772226232785429	708507119564305	419011354268537	543824767794549	462798697992996	532976695229946	0.5709	1277	4359	0.4071	nonDE
105040371	XM_010916862	LOC105040371	protein KINESIN LIGHT CHAIN-RELATED 1	protein_coding	XP_010915164.1	.	53	103	425	537	98	134	589	482	366494923457535	735903518047498	122919905967718	143033204212794	707984702039942	828096805505336	15940844041981	140379654153461	-0.5368	0.4637	4902	0.7525	nonDE
105040377	XM_010916868	LOC105040377	protein TWIN LOV 1	protein_coding	XP_010915170.1	.	37	21	66	74	38	32	55	58	255854946564694	15003858134949	190887383385162	19710348439007	274524680382835	1977544610162	148853382395408	16892157553736	0.1007	0.1205	2631	0.9336	nonDE
105040378	XM_029263152	LOC105040378	polynucleotide 5'-hydroxyl-kinase NOL9-like	protein_coding	XP_029118985.1	.	77	61	80	64	24	40	76	45	532454888796796	435826355348518	231378646527469	170467878391412	173384008662843	24719307627025	205688310219109	131059843089331	0.3327	0.3986	2931	0.7793	nonDE
105040379	XM_010916870	LOC105040379	serine/threonine-protein phosphatase PP2A-1 catalytic subunit	protein_coding	XP_010915172.1	.	243	170	347	287	161	180	243	315	168034464906002	121459803949587	10036048793129	764441892161487	116311772477991	111236884321612	657661307674258	917418901625317	0.05344	0.0837	5022	0.9551	nonDE
105040381	XM_010916871	LOC105040381	17.3 kDa class II heat shock protein	protein_coding	XP_010915173.1	.	669	517	97	47	0	0	0	3	462613403383191	369380697893744	280546608914557	125187348193693	0	0	0	0.873732287262207	7464	0.4304	0.8194	0.7661	nonDE
105040383	XM_010916873	LOC105040383	aminopeptidase M1	protein_coding	XP_010915175.1	.	1109	1066	2329	2270	635	695	1681	1425	766873339838503	761624417707411	673601084703095	604628256169539	458745189587106	429497970019559	454950065103057	415022836449548	0.451	1893	7453	0.2161	nonDE
105040386	XM_010916888	LOC105040386	hexokinase-2	protein_coding	XP_010915190.1	.	99	131	121	138	79	88	75	105	684584857024453	935954959846818	349960202872797	367571362781482	570722361848525	543824767794549	202981885084648	305806300541772	0.4475	0.5736	3828	0.7058	nonDE
105040388	XM_010916891,XM_010916892	LOC105040388	mitogen-activated protein kinase kinase 2, transcript variant X1	protein_coding	XP_010915193.1		231	156	309	469	178	173	478	377	159736466639039	111457231859621	89370002221235	124920992133706	128593139758275	106911005486883	129367121427282	109799024099284	-0.2137	0.494	5.23	0.7385	nonDE
105040389	XM_010916894	LOC105040389	transcriptional elongation regulator MINIYO	protein_coding	XP_010915196.1	.	151	101	316	270	113	104	252	210	104416478192619	721614129347547	913945653783504	719161361963769	816349707454219	642701998302649	682019133884416	611612601083545	0.1053	0.2159	4587	0.8818	nonDE
105040391	XM_010916896,XM_029263155	LOC105040391	serine/threonine-protein kinase 38, transcript variant X1	protein_coding	XP_010915198.1		41	47	195	272	106	39	186	136	283514940787905	335800634448858	563985450910706	7244884831635	765779371594223	241013249363493	503395075009926	396091970225534	-0.03969	0.0293	3811	0.9863	nonDE
105040392	XM_010916900	LOC105040392	elongation factor 2	protein_coding	XP_010915202.1	.	3162	3352	9901	8442	1322	1854	6694	6652	218652254334477	239490154611186	286359997408559	224857785840672	955056914384494	114573990851261	181168098500884	193735572495607	0.6284	0.9894	9182	0.5151	nonDE
105040393	XM_010916899	LOC105040393	protein ALP1-like	protein_coding	XP_010915201.2	.	255	267	2248	3453	2290	4441	9287	5843	176332463172965	190763339144351	650173996742189	919727475133664	165437241599129	274446112929045	251345702237483	170173925149102	-2728	2094	8136	0.1908	nonDE
105040397	XM_010916902,XM_010916903,XM_019849613	LOC105040397	uncharacterized protein YwkD, transcript variant X1	protein_coding	XP_010915204.1		422	375	34	47	91	110	55	32	291812939054868	267926038124089	983359247741745	125187348193693	657414366179946	679780959743186	148853382395408	93198110641302	1163	0.3992	3655	0.7793	nonDE
105040399	XM_010916904	LOC105040399	(S)-coclaurine N-methyltransferase	protein_coding	XP_010915206.1	.	241	252	197	162	140	214	97	88	166651465194841	180046297619388	569769917073893	431496817178261	101140671719992	132248295804583	262523238042811	256294804263581	0.6204	0.4699	4499	0.7506	nonDE
105040400	XM_010916905	LOC105040400	uncharacterized LOC105040400	protein_coding	XP_010915207.1	.	351	305	307	309	453	278	338	349	24271644930867	217913177674259	887915556049163	823040225358535	327262316351116	171799188007823	914771695448145	10164418941817	-0.3097	0.3096	5527	0.8247	nonDE
105040405	XM_010916911,XR_831108	LOC105040405	DEAD-box ATP-dependent RNA helicase 20, transcript variant X2	protein_coding	XP_010915213.1	.	293	322	303	337	101	208	184	218	202609457685015	230059158069218	87634662372279	897619922154778	729657703122798	12854039966053	497982224741002	63491212874387	0.6955	1114	5001	0.464	nonDE
105040413	XM_010916918	LOC105040413	uncharacterized LOC105040413	protein_coding	XP_010915220.1	.	64	102	111	74	37	33	171	112	442559907571363	728758823697522	321037872056864	19710348439007	26730034668855	203934287922956	462798697992996	326193387244557	-0.2599	0.2909	3426	0.8348	nonDE
105040414	XM_029263161,XM_029263162,XM_029263163	LOC105040414	nucleosome assembly protein 1				45	32	164	140	52	12	98	130	311174935011115	228630219199223	474326225381312	372898483981213	375665352102827	0.741579228810749	265229663177273	37861732448029	0.2187	0.1944	3.15	0.8932	nonDE
105040419	XM_010916926,XM_010916927	LOC105040419	beta-galactosidase, transcript variant X1	protein_coding	XP_010915228.1		28	177	194	232	1269	482	150	653	193619959562471	12646108999457	561093217829113	617946059168868	916767945804782	297867656905651	405963770169295	190182394527407	-2083	1211	5093	0.4281	nonDE
105040423	XM_010916933,XM_010916934,XM_029263170,XM_029263171,XR_002164112,XR_002164113	LOC105040423	histone deacetylase 2, transcript variant X4	protein_coding	XP_010915235.1		174	64	93	100	46	37	54	42	120320974870964	457260438398445	268977676588183	266356059986581	332319349937116	228653595549981	146146957260946	122322520216709	1223	1325	3221	0.3859	nonDE
105040429	XM_010916941,XM_010916942	LOC105040429	V-type proton ATPase subunit B 2, transcript variant X1	protein_coding	XP_010915243.1		731	629	1095	1194	293	362	813	728	505486394429167	449401274613472	316699522434474	318029135623978	211672977242554	223709734024576	220032363431758	212025701708962	0.6304	2643	6522	0.1259	nonDE
105040430	XM_010916944	LOC105040430	translation machinery-associated protein 22	protein_coding	XP_010915246.1	.	87	62	178	135	62	37	92	99	601604874354822	442971049698494	514817488523619	359580680981884	447908689045678	228653595549981	248991112370501	288331654796528	0.5374	1198	3564	0.4325	nonDE
105040431	XM_010916945	LOC105040431	transmembrane 9 superfamily member 7	protein_coding	XP_010915247.1	.	231	286	942	823	234	130	623	651	159736466639039	204338258409305	272448356286095	219211037368956	169049408446272	803377497878311	168610285876981	189599906335899	0.3114	0.3932	5786	0.7808	nonDE
105040432	XM_010916947	LOC105040432	eukaryotic initiation factor 4A-8	protein_coding	XP_010915249.1	.	819	611	1693	1725	503	475	1162	1196	566338381720229	436540824783516	489655060713757	459464203476852	363383984822542	293541778070921	314486600624481	348327938521866	0.3335	1011	6982	0.5061	nonDE
105040436	XM_010916959	LOC105040436	lysM domain receptor-like kinase 3	protein_coding	XP_010915261.1	.	84	28	294	349	86	91	208	186	580859878687414	20005144179932	85031652598845	929582649353168	621292697708521	562364248514818	562936427968089	541714018102568	-0.129	0.09446	4156	0.948	nonDE
105040438	XM_010916956,XM_010916957,XM_029263172	LOC105040438	probable sugar phosphate/phosphate translocator At3g17430, transcript variant X1	protein_coding	XP_010915258.1		0	27	56	87	64	0	69	78	0	192906747449344	161965052569229	231729772188325	462357356434248	0	186743334277876	227170394688174	-0.4357	0.09409	1331	0.948	nonDE
105040443	XM_010916965,XM_019849301	LOC105040443	receptor-like serine/threonine-protein kinase ALE2, transcript variant X1	protein_coding	XP_010915267.1		28	19	73	102	27	18	61	142	193619959562471	135749192649538	211133014956316	271683181186313	195057009745698	111236884321612	16509193320218	413566615970778	-0.1594	0.1215	2657	0.9333	nonDE
105040445	XM_010916970,XM_010916973,XM_019849304,XM_019849306,XM_019849307,XM_029263173,XM_029263174,XM_029263175,XM_029263176,XM_029263177,XM_029263178,XM_029263179,XM_029263180	LOC105040445	calumenin, transcript variant X13	protein_coding	XP_010915272.1		99	88	435	360	195	185	495	444	684584857024453	628733102797862	125812139049311	958881815951691	14087450703856	11432679777499	133968044155867	129312378514807	-0.7465	1408	5053	0.352	nonDE
105040447	XM_010916975	LOC105040447	protein indeterminate-domain 7	protein_coding	XP_010915277.1	.	347	315	118	185	222	185	280	212	239950449886349	225057872024235	341283503628017	492758710975175	16038020801313	11432679777499	757799037649351	617437482998626	-0.2675	0.1809	4941	0.8993	nonDE
105040448	XM_010916976,XM_019848818	LOC105040448	probable phospholipid-transporting ATPase 4, transcript variant X2	protein_coding	XP_010915278.1		44	55	157	294	60	76	165	141	304259936455312	392958189248664	454080593810158	783086816360548	433460021657108	469666844913474	446560147186225	410654175013237	-0.07327	0.07099	3829	0.9599	nonDE
105040452	XM_010916984,XM_010916985	LOC105040452	BTB/POZ domain and ankyrin repeat-containing protein NPR1, transcript variant X2	protein_coding	XP_010915286.1		148	118	84	167	43	15	147	87	102341978625878	843073933297133	242947578853843	44481462017759	31064634885426	0.926974036013436	397844494765909	25338236330604	0.5915	0.543	3514	0.7198	nonDE
105040454	XM_019855054,XR_002166122,XR_003800841,XR_003800842	LOC105040454	MMS19 nucleotide excision repair protein homolog, transcript variant X4	protein_coding	XP_019710613.1	.	144	136	199	218	83	126	262	155	995759792035567	971678431596696	57555438323708	580656210770747	599619696625665	778658190251286	709083385229035	451428348418807	0.0389	0.06285	4441	0.9655	nonDE
105040455	XM_010916986,XM_010916987,XM_019849635,XR_003800133,XR_003800134,XR_003800135,XR_003800136,XR_003800137,XR_003800138,XR_003800139,XR_003800140,XR_003800141,XR_003800142,XR_003800143,XR_003800144	LOC105040455	heat shock factor protein HSF30, transcript variant X12	protein_coding	XP_010915288.1		309	264	135	71	0	0	7	9	213673455374299	188619930839359	390451466015104	189112802590472	0	0	189449759412338	262119686178662	5973	0.5946	1361	0.6944	nonDE
105040460	XM_010916993,XM_010916994,XM_019849309,XM_029263187	LOC105040460	cysteine synthase, transcript variant X2	protein_coding	XP_010915295.1		61	67	199	169	34	21	139	82	421814911903956	478694521448372	57555438323708	450141741377322	245627345605694	129776365041881	376193093690213	238820158518336	0.5624	0.8885	3407	0.5604	nonDE
105040464	XM_010916999,XM_019848993	LOC105040464	uncharacterized LOC105040464, transcript variant X2	protein_coding	XP_010915301.1		16	17	120	107	19	0	67	55	110639976892841	121459803949587	347067969791204	285000984185642	137262340191417	0	181330484008952	160184252664738	1429	0.5547	1.77	0.7133	nonDE
105040466	XM_010917000,XM_010917001,XM_010917002	LOC105040466	uncharacterized LOC105040466, transcript variant X1	protein_coding	XP_010915302.1		39	132	1229	1655	682	927	3057	2248	269684943676299	943099654196793	355455445727825	440819279277792	492699557950246	572869954256303	827354163605023	654716727255147	-2129	1353	6558	0.3746	nonDE
105040475	XM_010917014,XM_010917015,XM_010917016	LOC105040475	serine/threonine protein phosphatase 2A 55 kDa regulatory subunit B beta isoform, transcript variant X2	protein_coding	XP_010915316.1		120	162	293	321	172	196	315	324	829799826696306	115744048469606	847424292906856	855002952556925	124258539541704	121124607372422	85252391735552	943630870243183	-0.3775	1094	4955	0.4713	nonDE
105040482	XM_010917029	LOC105040482	mitochondrial carrier protein CoAc2	protein_coding	XP_010915331.1	.	44	63	201	131	43	70	184	137	304259936455312	45011574404847	581338849400267	348926438582421	31064634885426	432587883472937	497982224741002	399004411183074	-0.2054	0.2826	3692	0.8378	nonDE
105040486	XM_010917036	LOC105040486	ABC transporter C family member 8	protein_coding	XP_010915338.1	.	399	448	406	585	44	51	753	386	275908442376522	320082306878912	117424663112691	15581829509215	317870682548546	315171172244568	203793812624986	112420220961071	1079	0.95	5224	0.5394	nonDE
105040490	XM_029263196	LOC105040490	K(+) efflux antiporter 4	protein_coding	XP_029119029.1	.	16	7	69	90	9	0	65	58	110639976892841	0.5001286044983	199564082629942	239720453987923	0.650190032485661	0	175917633740028	16892157553736	0.9427	0.312	1361	0.8247	nonDE
105040491	XM_010917043	LOC105040491	40S ribosomal protein S24-1	protein_coding	XP_010915345.1	.	200	117	291	290	60	0	111	134	138299971116051	835929238947158	841639826743669	772432573961085	433460021657108	0	300413189925278	390267088310452	1979	1178	3357	0.4371	nonDE
105040492	XM_029263197	LOC105040492	probable inositol oxygenase	protein_coding	XP_029119030.1	.	0	0	570	244	4	0	924	576	0	0	164857285650822	649908786367258	0.288973347771405	0	250073682424286	167756599154344	-2328	0.3222	1556	0.8167	nonDE
105040499	XM_010917048	LOC105040499	DNA mismatch repair protein MSH5	protein_coding	XP_010915350.1	.	53	67	67	64	74	0	149	89	366494923457535	478694521448372	193779616466756	170467878391412	534600693377099	0	403257345034833	259207245221121	-0.04282	0.015	2.5	0.9937	nonDE
105040500	XM_010917049	LOC105040500	DNA repair protein RadA	protein_coding	XP_010915351.1	.	96	66	90	53	24	0	80	73	663839861357045	471549827098397	260300977343403	141168711792888	173384008662843	0	216514010756957	21260818990047	1025	0.3467	2275	0.805	nonDE
105040501	XM_010917050,XR_003800148	LOC105040501	ATP-dependent 6-phosphofructokinase 3, transcript variant X1	protein_coding	XP_010915352.1	.	323	411	930	906	337	420	1113	1030	223354453352422	293646937784002	268977676588183	241318590347842	243460045497409	259552730083762	301225117465617	299981418626691	-0.3184	0.8463	6.39	0.5852	nonDE
105040502	XM_010917055,XM_010917062,XM_029264467	LOC105040502	NADP-dependent malic enzyme, transcript variant X3	protein_coding	XP_010915357.1		1208	1065	1342	1462	872	769	1070	1137	835331825540948	760909948272413	38813767954983	389412559700381	629961898141663	475228689129555	28958748938743	331144536872376	0.235	0.3731	7243	0.7906	nonDE
105040506	XM_010917060,XM_010917061	LOC105040506	deSI-like protein At4g17486, transcript variant X1	protein_coding	XP_010915362.1		113	59	232	220	65	65	175	193	781394836805688	421536966648567	670998074929661	585983331970478	469581690128533	401688748939155	473624398530844	562101104805353	0.1325	0.1944	4082	0.8932	nonDE
105040517	XM_010917072,XM_010917073,XM_010917074,XM_029263203,XM_029263204	LOC105040517	nuclear poly(A) polymerase 4, transcript variant X1	protein_coding	XP_010915374.1		370	450	559	606	368	196	839	596	255854946564694	321511245748907	161675829261069	161411772351868	265855479949693	121124607372422	227069068781359	173581481069425	-0.03991	0.05177	5996	0.9721	nonDE
105040520	XM_010917077	LOC105040520	hexokinase-2	protein_coding	XP_010915379.1	.	44	68	364	533	374	193	1573	1105	304259936455312	485839215798348	105277284169999	141967779972848	270190080166264	119270659300395	425720673650867	321824725808246	-1967	1886	5398	0.2161	nonDE
105040525	XM_010917081,XM_010917082	LOC105040525	auxin-responsive protein IAA16, transcript variant X2	protein_coding	XP_010915383.1		0	0	97	90	3	0	302	149	0	0	280546608914557	239720453987923	0.216730010828554	0	817340390607514	433953702673563	-1925	0.3168	0.5684	0.8216	nonDE
105040526	XM_010917083	LOC105040526	clavaminate synthase-like protein At3g21360	protein_coding	XP_010915385.1	.	187	155	93	71	34	95	95	34	129310472993508	110742762424623	268977676588183	189112802590472	245627345605694	587083556141843	257110387773887	990229925563834	1.04	0.738	3.51	0.6308	nonDE
105040527	XM_010917084,XM_010917085,XM_010917086,XM_010917087,XM_010917088,XM_010917089,XM_019849536,XM_019849537,XM_029263206,XM_029263208,XM_029263209	LOC105040527	uncharacterized protein C3F10.06c, transcript variant X4	protein_coding	XP_010915386.1		124	122	225	178	94	142	148	120	857459820919516	871652710697036	650752443358507	474113786776114	679087367262802	877535420759386	400550919900371	349492914904883	0.2089	0.3108	4276	0.8247	nonDE
105040528	XM_010917090,XM_010917095,XR_003800834,XR_003800835,XR_003800836,XR_003800837	LOC105040528	uncharacterized LOC105040528, transcript variant X3	protein_coding	XP_010915392.1		147	160	659	547	164	201	513	393	101650478770297	114315109599611	190598160077003	14569676481266	118479072586276	1242145208258	138839609397899	114458929631349	-0.0574	0.07127	5.35	0.9599	nonDE
105040529	XM_010917091	LOC105040529	40S ribosomal protein S24-1	protein_coding	XP_010915393.1	.	115	110	180	115	39	33	56	87	795224833917293	785916378497328	520601954686806	306309468984568	28174901407712	203934287922956	15155980752987	25338236330604	1194	1998	3475	0.1996	nonDE
105040530	XM_010917092	LOC105040530	NADP-dependent malic enzyme	protein_coding	XP_010915394.1	.	46	52	1209	1025	77	98	1225	2699	318089933566917	371524106198737	349670979564638	273014961486246	556273694459955	605623036862111	331537078971591	786067814440232	-0.8647	0.311	5402	0.8247	nonDE
105040536	XM_010917099	LOC105040536	ABC transporter G family member 42	protein_coding	XP_010915401.1	.	87	90	1576	1919	227	307	5210	5360	601604874354822	643022491497814	455815933659114	511137279114249	163992374860272	189720686037417	141004749505468	156106835324181	-1.42	0.6178	6.56	0.6835	nonDE
105040538	XM_010917102	LOC105040538	casein kinase 1-like protein HD16	protein_coding	XP_010915404.1	.	926	866	1122	925	584	834	1341	1184	640328866267316	618730530707896	324508551754776	246379355487587	421901087746251	51539756402347	36293161053135	344833009372818	-0.1411	0.2322	7033	0.871	nonDE
105040544	XM_010917107,XM_010917108,XM_029263216,XR_002164291	LOC105040544	homeobox-leucine zipper protein ATHB-15, transcript variant X1	protein_coding	XP_010915409.1		48	72	467	453	52	80	558	442	331919930678522	514417993198251	13506728491041	120659295173921	375665352102827	494386152540499	151018522502978	128729890323298	-0.3139	0.1847	4575	0.8967	nonDE
105040545	XM_010917111,XM_010917112,XM_019849365,XR_003800170,XR_003800171,XR_831161,XR_831162,XR_831163	LOC105040545	phosphoribosylaminoimidazole carboxylase, chloroplastic, transcript variant X8	protein_coding	XP_010915413.1		303	307	228	216	108	121	211	142	209524456240817	219342116544254	659429142603287	575329089571015	780228038982794	747759055717505	571055703371475	413566615970778	0.6552	0.813	4.73	0.5996	nonDE
105040552	XM_010917122	LOC105040552	putative ABC transporter B family member 8	protein_coding	XP_010915424.2	.	68	60	149	203	33	45	514	709	470219901794573	428681660998542	430942729157412	540702801772759	238403011911409	278092210804031	139110251911345	206492063889635	-0.9239	0.5969	4141	0.6938	nonDE
105040554	XM_010917119,XM_010917120,XM_010917121,XM_010917123	LOC105040554	probable serine/threonine-protein kinase At1g54610, transcript variant X2	protein_coding	XP_010915421.1		136	130	222	207	131	95	166	156	940439803589147	928810265496842	642075744113727	551357044172223	946387713951352	587083556141843	449266572320686	454340789376347	0.1827	0.3279	4384	0.8152	nonDE
105040555	XM_010917125,XM_010917126	LOC105040555	mitogen-activated protein kinase kinase kinase 11, transcript variant X1	protein_coding	XP_010915427.1		65	73	64	63	22	0	57	60	449474906127166	521562687548227	185102917221975	167804317791546	158935341274273	0	154266232664332	174746457452441	1152	0.4548	2082	0.7539	nonDE
105040562	XM_010917133,XM_010917134,XM_029263221,XM_029263222,XM_029263223,XM_029263224,XM_029263225	LOC105040562	trifunctional UDP-glucose 4,6-dehydratase/UDP-4-keto-6-deoxy-D-glucose 3,5-epimerase/UDP-4-keto-L-rhamnose-reductase RHM1, transcript variant X1	protein_coding	XP_010915435.1		0	8	185	99	13	0	43	101	0	0.571575547998057	535063120094773	263692499386715	0.939163380257066	0	116376280781865	29415653671161	0.5038	0.09836	1036	0.9462	nonDE
105040568	XM_010917149	LOC105040568	serine/threonine-protein phosphatase 5	protein_coding	XP_010915451.1	.	220	221	348	433	218	194	300	390	152129968227656	157897745134463	100649711239449	11533217397419	157490474535416	119888641991071	81192754033859	113585197344087	-0.02112	0.03484	5271	0.982	nonDE
105040572	XM_010917154	LOC105040572	ras-related protein RABB1c	protein_coding	XP_010915456.3	.	63	57	294	262	36	0	68	82	435644909015561	407247577948615	85031652598845	697852877164842	260076012994265	0	184036909143414	238820158518336	2126	0.8078	2737	0.6008	nonDE
105040575	XM_010917157	LOC105040575	citrate synthase, glyoxysomal	protein_coding	XP_010915459.1	.	107	61	247	143	80	37	118	140	739904845470873	435826355348518	714381571153561	380889165780811	57794669554281	228653595549981	319358165866512	407741734055696	0.4104	0.5928	3.82	0.6964	nonDE
105040578	XM_010917160,XM_010917162,XM_029263231,XM_029263232,XR_003800175,XR_003800176,XR_831178	LOC105040578	lateral signaling target protein 2 homolog, transcript variant X3	protein_coding	XP_010915462.1		73	46	330	249	119	93	304	317	504794894573586	328655940098883	954436916925811	663226589366587	85969570961993	57472390232833	822753240876438	923243783540398	-0.6008	0.7834	4406	0.6088	nonDE
105040581	XM_010917170	LOC105040581	uncharacterized LOC105040581	protein_coding	XP_010915472.1	.	22	38	140	135	13	22	46	58	152129968227656	271498385299077	404912631423071	359580680981884	0.939163380257066	135956191948637	12449555618525	16892157553736	1138	1099	2.6	0.4696	nonDE
105040583	XM_010917172	LOC105040583	shaggy-related protein kinase eta	protein_coding	XP_010915474.1	.	87	113	234	243	66	67	103	166	601604874354822	807350461547255	676782541092848	647245225767392	476806023822818	414048402752668	278761788849583	483465198951754	0.5911	1312	4056	0.3905	nonDE
105040587	XM_010917176	LOC105040587	60S ribosomal protein L11	protein_coding	XP_010915478.1	.	298	204	404	380	96	120	202	203	206066956962916	145751764739504	116846216496372	101215302794901	693536034651372	741579228810749	546697877161317	59122551438076	0.8906	2.8	4892	0.1129	nonDE
105040589	XM_010917178	LOC105040589	ras-related protein RIC2	protein_coding	XP_010915480.1	.	114	239	335	331	197	180	259	237	788309835361491	170758194964419	968898082333778	881638558555583	142319373777417	111236884321612	700964109825649	690248506937143	-0.006921	0.008028	4963	0.9962	nonDE
105040590	XM_019848947,XR_003800183,XR_003800184	LOC105040590	uncharacterized LOC105040590, transcript variant X1	protein_coding	XP_019704506.1	.	1573	1637	94	121	609	773	67	50	108772927282774	116958646509102	271869909669776	322290832583763	439961921981964	477700619892257	181330484008952	145622047877034	1072	0.2732	5317	0.8446	nonDE
105040592	XM_010917182,XM_010917183,XM_019849644,XR_831187,XR_831188,XR_831191	LOC105040592	probable sugar phosphate/phosphate translocator At1g06470, transcript variant X1	protein_coding	XP_010915484.1		69	145	582	713	134	121	1207	1222	477134900350376	103598068074648	168327965348734	189911870770432	968060715034207	747759055717505	326665513729559	355900285011472	-0.8065	0.5422	5453	0.72	nonDE
105040601	XM_010917194	LOC105040601	mitochondrial dicarboxylate/tricarboxylate transporter DTC	protein_coding	XP_010915496.1	.	87	98	129	192	53	109	95	96	601604874354822	700180046297619	373098067525544	511403635174235	382889685797112	67360113283643	257110387773887	279594331923906	0.4251	0.7042	3817	0.6423	nonDE
105040608	XM_019855523	LOC105040608	ABC transporter G family member 42	protein_coding	XP_019711082.1	.	29	57	69	404	16	0	45	87	200534958118274	407247577948615	199564082629942	107607848234579	115589339108562	0	121789131050789	25338236330604	1968	0.406	2.21	0.7759	nonDE
105040610	XM_010917204	LOC105040610	low-temperature-induced cysteine proteinase	protein_coding	XP_010915506.1	.	212	189	269	296	23	59	108	316	146597969383014	135034723214541	778010698948616	78841393756028	166159674968558	364609787498618	292293914521892	920331342582858	1036	1327	4284	0.3854	nonDE
105040611	XM_010917206,XM_010917207	LOC105040611	probable serine/threonine-protein kinase SIS8, transcript variant X1	protein_coding	XP_010915508.1		185	206	237	295	199	197	305	213	127927473282347	1471807036095	685459240337628	785750376960414	143764240516274	121742590063098	8254596660109	620349923956167	-0.1466	0.2126	4969	0.883	nonDE
105040614	XM_010917209,XM_010917212	LOC105040614	SCAR-like protein 2, transcript variant X1	protein_coding	XP_010915511.1		0	0	134	217	4	0	142	313	0	0	387559232933511	577992650170881	0.288973347771405	0	384312369093599	911594019710235	-1183	0.1875	0.8277	0.896	nonDE
105040615	XM_019845762,XM_029264428,XM_029264429,XM_029264435	LOC105040615	kinesin-like protein KIN-14C, transcript variant X2	protein_coding	XP_019701321.1		104	121	366	554	174	126	307	540	719159849803465	864508016347061	105855730786317	147561257232566	125703406280561	778658190251286	830872516279824	157271811707197	-0.2585	0.2862	5026	0.8375	nonDE
105040616	XM_010917213	LOC105040616	phosphoenolpyruvate carboxylase, housekeeping isozyme	protein_coding	XP_010915515.1	.	1639	1979	3656	2519	778	578	1847	2561	113336826329604	141393501186019	105740041463053	670950915106197	562053161415383	357193995210511	499876722335125	74587612922617	0.8235	1671	7861	0.2699	nonDE
105040617	XM_010917214	LOC105040617	dol-P-Man:Man(6)GlcNAc(2)-PP-Dol alpha-1,2-mannosyltransferase	protein_coding	XP_010915516.1	.	114	79	270	255	53	70	277	207	788309835361491	564430853648081	780902932030209	679207952965781	382889685797112	432587883472937	749679762245965	602875278210922	0.1535	0.2092	4261	0.8851	nonDE
105040619	XM_010917220,XM_010917221,XM_019848958	LOC105040619	putative lipase YDR444W, transcript variant X1	protein_coding	XP_010915522.1		198	139	174	162	82	66	99	50	136916971404891	993112514646623	503248556197246	431496817178261	59239536293138	407868575845912	267936088311735	145622047877034	1271	1778	3929	0.2452	nonDE
105040620	XM_010917224,XM_010917225	LOC105040620	14-3-3-like protein D, transcript variant X1	protein_coding	XP_010915526.1		262	296	352	282	113	326	248	306	181172962162027	211482952759281	101806604472086	751124089162158	816349707454219	201462357160253	671193433346568	891206933007451	0.1713	0.1876	5177	0.896	nonDE
105040621	XM_010917226,XM_010917227,XM_019849460	LOC105040621	polyadenylate-binding protein-interacting protein 9, transcript variant X1	protein_coding	XP_010915528.1		66	83	132	108	31	21	108	120	456389904682968	593009631047984	381774766770324	287664544785507	223954344522839	129776365041881	292293914521892	349492914904883	0.2297	0.3228	3312	0.8162	nonDE
105040625	XM_029263242	LOC105040625	mitogen-activated protein kinase 1	protein_coding	XP_029119075.1	.	120	98	299	330	201	90	478	526	829799826696306	700180046297619	864777691396417	878974997955717	145209107255131	556184421608061	129367121427282	15319439436664	-0.6776	1003	4924	0.5076	nonDE
105040627	XM_019854237,XM_029264409,XM_029264411,XM_029264413,XM_029264414,XM_029264415,XM_029264416	LOC105040627	casein kinase 1-like protein HD16, transcript variant X7	protein_coding	XP_019709796.1		558	559	793	657	596	557	614	522	385856919413782	399388414163642	229354083370354	174995931411184	430570288179394	344216358706322	166174503255965	152029417983624	-0.01815	0.01808	6381	0.9912	nonDE
105040628	XM_010917239,XM_010917240,XM_010917243,XM_029263243	LOC105040628	E3 ubiquitin-protein ligase GW2, transcript variant X1	protein_coding	XP_010915541.1		88	84	63	68	44	46	64	43	608519872910624	600154325397959	182210684140382	181122120790875	317870682548546	284272037710787	173211208605566	12523496117425	0.4451	0.4755	3074	0.7481	nonDE
105040639	XM_010917259,XM_029263245,XM_029263247	LOC105040639	potassium channel KAT2, transcript variant X1	protein_coding	XP_010915561.1		53	24	863	727	87	75	276	377	366494923457535	171472664399417	249599714941508	193640855610244	628517031402806	463487018006718	746973337111503	109799024099284	0.07893	0.03034	4518	0.9861	nonDE
105040640	XM_010917261	LOC105040640	mannosyl-oligosaccharide 1,2-alpha-mannosidase MNS3	protein_coding	XP_010915563.1	.	84	107	271	275	127	92	323	384	580859878687414	764482295447401	783795165111802	732479164963098	917490379174211	568544075421574	874175318431215	111837732769562	-0.4621	0.839	4.62	0.5861	nonDE
105040641	XM_010917263,XM_010917264	LOC105040641	prefoldin subunit 6, transcript variant X1	protein_coding	XP_010915565.1		112	39	218	196	41	67	118	108	774479838249886	278643079649053	630506811787354	522057877573699	29619768146569	414048402752668	319358165866512	314543623414394	0.4633	0.6156	3722	0.6842	nonDE
105040642	XM_010917265,XM_010917266,XR_003800190	LOC105040642	phospho-N-acetylmuramoyl-pentapeptide-transferase homolog, transcript variant X3	protein_coding	XP_010915567.1		23	22	123	154	21	0	96	93	159044966783459	157183275699466	355744669035984	410188332379335	151711007579988	0	259816812908349	270857009051284	1193	0.4494	2125	0.7565	nonDE
105040645	XM_019849457,XM_019849458	LOC105040645	putative callose synthase 8, transcript variant X1	protein_coding	XP_019705016.1		59	62	533	443	60	59	191	209	40798491479235	442971049698494	154156023248926	117995734574055	433460021657108	364609787498618	516927200682236	608700160126004	0.5615	0.4566	4248	0.7539	nonDE
105040647	XM_010917275,XR_002164303,XR_002164304	LOC105040647	probable pre-mRNA-splicing factor ATP-dependent RNA helicase DEAH9, transcript variant X3	protein_coding	XP_010915577.1	.	328	309	575	484	214	311	579	550	226811952630324	220771055414249	166303402191619	128916333033505	154600741057702	192192616800119	156702015285348	160184252664738	-0.0942	0.2414	5775	0.8671	nonDE
105040648	XM_010917276	LOC105040648	sodium/calcium exchanger NCL1	protein_coding	XP_010915578.1	.	144	176	701	500	365	201	349	458	995759792035567	125746620559572	202745539019695	13317802999329	263688179841407	1242145208258	944542371927226	133389795855364	-0.1967	0.2151	5461	0.8825	nonDE
105040659	XM_010917295,XM_010917296,XM_010917299,XR_003800192	LOC105040659	transcription factor GTE4, transcript variant X1	protein_coding	XP_010915597.1		96	60	115	63	105	102	113	127	663839861357045	428681660998542	332606804383237	167804317791546	758555037899938	630342344489136	305826040194202	369880001607667	-0.697	0.9426	3718	0.5432	nonDE
105040661	XM_010917303	LOC105040661	malate dehydrogenase, mitochondrial	protein_coding	XP_010915605.1	.	135	91	278	301	61	43	277	307	933524805033344	650167185847789	804040796682956	801731740559609	440684355351393	265732556990518	749679762245965	894119373964991	0.2765	0.2943	4361	0.8321	nonDE
105040663	XM_010917305	LOC105040663	GDSL esterase/lipase At5g45910	protein_coding	XP_010915607.2	.	0	28	118	142	13	0	184	224	0	20005144179932	341283503628017	378225605180945	0.939163380257066	0	497982224741002	652386774489114	-0.6174	0.1281	1642	0.9301	nonDE
105040672	XM_010917328,XR_002166328,XR_002166330,XR_002166331,XR_002166332,XR_002166333,XR_003800814,XR_003800818	LOC105040672	golgin-84, transcript variant X3	protein_coding	XP_010915630.1	.	200	180	257	301	146	173	328	271	138299971116051	128604498299563	743303901969495	801731740559609	105475271936563	106911005486883	887707444103525	789271499493527	-0.1197	0.2678	4954	0.8505	nonDE
105040675	XM_010917355,XM_010917427,XM_010917579,XM_019854038	LOC105040675	transcriptional corepressor LEUNIG, transcript variant X1	protein_coding	XP_010915657.1		668	569	638	645	431	574	836	604	46192190352761	406533108513618	184524470605657	171799658691345	311368782223689	354722064447808	22625714124102	175911433835458	-0.1026	0.1293	6403	0.9298	nonDE
105040679	XM_010917327	LOC105040679	protein DJ-1 homolog B	protein_coding	XP_010915629.1	.	182	184	632	522	117	128	327	182	125852973715606	131462376039553	182789130756701	139037863312995	84524704223136	791017844064798	885001018969063	530064254272405	0.7621	1719	5036	0.2567	nonDE
105040684	XM_010917332	LOC105040684	CTP synthase	protein_coding	XP_010915634.1	.	92	92	364	220	113	57	154	93	636179867133835	657311880197765	105277284169999	585983331970478	816349707454219	352250133685106	416789470707143	270857009051284	0.6828	1062	4127	0.488	nonDE
105040690	XM_010917342,XR_831212	LOC105040690	isocitrate dehydrogenase [NADP], transcript variant X1	protein_coding	XP_010915644.1	.	80	147	415	439	68	178	497	346	553199884464204	105027006944643	120027672886125	116930310334109	491254691211389	110000918940261	13450932918276	100770457130908	-0.1838	0.173	4894	0.906	nonDE
105040691	XM_010917345,XM_029263251	LOC105040691	histone-lysine N-methyltransferase ATX4, transcript variant X2	protein_coding	XP_010915647.1		270	290	201	316	184	202	319	348	186704961006669	207196136149296	581338849400267	841685149557596	132927739974846	124832503516476	863349617893367	101352945322416	-0.1601	0.1875	5168	0.896	nonDE
105040694	XM_010917348,XM_010917349	LOC105040694	uncharacterized LOC105040694, transcript variant X2	protein_coding	XP_010915650.1		60	50	112	157	44	52	103	97	414899913348153	357234717498785	323930105138457	418179014178932	317870682548546	321350999151324	278761788849583	282506772881447	0.1817	0.3307	3419	0.8141	nonDE
105040700	XM_010917352,XM_029263254	LOC105040700	long chain acyl-CoA synthetase 4, transcript variant X1	protein_coding	XP_010915654.1		206	162	231	296	277	297	525	451	142448970249533	115744048469606	668105841848068	78841393756028	200114043331698	18354085913066	142087319559253	131351087185085	-0.9697	2844	5307	0.1091	nonDE
105040702	XM_010917354	LOC105040702	putative adenylate cyclase regulatory protein	protein_coding	XP_010915656.1	.	8	0	76	99	32	33	108	52	0.553199884464204	0	219809714201096	263692499386715	231178678217124	203934287922956	292293914521892	151446929792116	-1257	0.4952	1839	0.7377	nonDE
105040703	XM_019849276,XM_019849277,XM_019849278,XM_029263255,XM_029263256,XM_029263257,XR_002164274,XR_002164275	LOC105040703	spermine synthase, transcript variant X6	protein_coding	XP_019704835.1		112	97	400	209	104	135	98	72	774479838249886	693035351947644	115689323263735	556684165371954	751330704205653	834276632412092	265229663177273	20969574894293	0.8495	1008	4192	0.5063	nonDE
105040706	XM_010917361	LOC105040706	cyclic nucleotide-gated ion channel 1	protein_coding	XP_010915663.1	.	179	158	524	404	168	250	794	554	123778474148866	112886170729616	151553013475492	107607848234579	12136880606399	154495672668906	21489015567628	161349229047754	-0.5948	1346	5472	0.3776	nonDE
105040707	XM_010917362,XM_010917363,XM_010917364,XM_019849563	LOC105040707	uncharacterized LOC105040707, transcript variant X4	protein_coding	XP_010915664.1		511	370	295	325	395	269	363	362	35335642620151	264353690949101	853208759070043	865657194956388	285361180924262	166237343791743	982432323809694	105430362662973	-0.09855	0.07716	5.62	0.9586	nonDE
105040709	XM_010917366	LOC105040709	abscisic acid receptor PYL8	protein_coding	XP_010915668.1	.	100	76	246	202	91	19	413	263	691499855580255	542996770598154	711489338071968	538039241172894	657414366179946	117416711228369	111775358053279	765971971833201	-0.05907	0.033	4152	0.9833	nonDE
105040718	XM_010917374	LOC105040718	bidirectional sugar transporter SWEET3b	protein_coding	XP_010915676.1	.	50	50	68	75	24	0	115	75	345749927790128	357234717498785	196671849548349	199767044989936	173384008662843	0	311238890463126	218433071815552	0.5895	0.2426	2191	0.8671	nonDE
105040732	XM_010917391,XR_831235	LOC105040732	dihydrofolate synthetase, transcript variant X2	protein_coding	XP_010915693.2	.	50	70	72	83	44	0	78	61	345749927790128	5001286044983	208240781874722	221075529788862	317870682548546	0	211101160488033	177658898409982	0.9713	0.4426	2.28	0.7596	nonDE
105040742	XM_010917409,XM_019849245,XM_019849246	LOC105040742	ubiquitin-conjugating enzyme E2 10, transcript variant X3	protein_coding	XP_010915711.1		2014	1802	2008	2677	1530	3024	3692	2686	139268070913863	128747392186562	580760402783948	713035172584077	110532305522562	186877965660309	999212159643358	782281641195429	-0.4825	0.8127	8338	0.5996	nonDE
105040746	XM_010917420,XM_010917421	LOC105040746	uncharacterized LOC105040746, transcript variant X1	protein_coding	XP_010915722.1		185	109	172	205	111	63	173	161	127927473282347	778771684147352	497464090034059	546029922972491	801901040065649	389329095125643	46821154826192	468902994164051	0.2619	0.4072	4269	0.7753	nonDE
105040747	XM_010917422	LOC105040747	ABC transporter C family member 10	protein_coding	XP_010915724.1	.	257	366	291	343	109	117	298	401	177715462884126	261495813209111	841639826743669	913601285753973	787452372677079	72303974809048	806514690069666	116788882397382	0.3813	0.553	5103	0.7143	nonDE
105040749	XM_010917423	LOC105040749	ABC transporter C family member 10	protein_coding	XP_010915725.1	.	191	216	234	258	92	131	208	315	132076472415829	154325397959475	676782541092848	687198634765379	664638699874232	809557324785067	562936427968089	917418901625317	0.1737	0.2666	4746	0.8513	nonDE
105040753	XM_010917426,XM_029263263,XM_029263264,XM_029263265	LOC105040753	BTB/POZ domain-containing protein POB1, transcript variant X4	protein_coding	XP_010915728.1		192	164	216	138	171	262	245	149	132767972271409	117172987339602	624722345624167	367571362781482	123536106172276	161911464957013	663074157943182	433953702673563	-0.3647	0.356	4702	0.8017	nonDE
105040759	XM_010917436,XM_010917437,XM_019848995	LOC105040759	F-box/kelch-repeat protein At3g61590, transcript variant X3	protein_coding	XP_010915738.1		74	64	102	81	95	175	64	55	511709893129389	457260438398445	295007774322523	215748408589131	686311700957087	108146970868234	173211208605566	160184252664738	-0.06085	0.03602	3533	0.9807	nonDE
105040768	XM_010917451,XR_003800223,XR_003800224,XR_003800225	LOC105040768	uroporphyrinogen decarboxylase 1, chloroplastic, transcript variant X4	protein_coding	XP_010915753.1	.	305	201	42	50	123	107	39	69	210907455951978	143608356434512	121473789426921	13317802999329	888593044397071	661241479022917	105550580244017	200958426070308	0.5488	0.2145	3658	0.8825	nonDE
105040769	XM_010917452	LOC105040769	uncharacterized LOC105040769	protein_coding	XP_010915754.3	.	106	108	114	114	73	140	153	119	73298984691507	771626989797377	329714571301644	303645908384702	527376359682814	865175766945873	414083045572681	346580473947342	-0.2825	0.3693	3.98	0.7929	nonDE
105040771	XM_010917454,XM_010917455,XM_010917456,XM_029263270	LOC105040771	S-type anion channel SLAH2, transcript variant X1	protein_coding	XP_010915756.1		15	7	187	205	5	18	103	64	103724978337038	0.5001286044983	540847586257959	546029922972491	0.361216684714256	111236884321612	278761788849583	186396221282604	0.9746	0.4733	2.33	0.7493	nonDE
105040772	XM_010917458	LOC105040772	post-GPI attachment to proteins factor 3	protein_coding	XP_010915760.1	.	131	100	345	273	95	127	307	251	905864810810134	714469434997571	997820413149711	727152043763366	686311700957087	784838017158042	830872516279824	731022680342713	-0.07061	0.1258	4.65	0.9317	nonDE
105040773	XM_010917461,XM_010917469	LOC105040773	ultraviolet-B receptor UVR8, transcript variant X1	protein_coding	XP_010915763.1		169	176	482	393	84	132	307	292	116863475593063	125746620559572	1394056345328	104677931574726	606844030319951	815737151691823	830872516279824	850432759601881	0.4238	1097	4935	0.4697	nonDE
105040778	XM_010917463	LOC105040778	reticulon-like protein B2	protein_coding	XP_010915765.1	.	290	246	1390	959	186	464	716	870	200534958118274	175759481009402	402020398341478	255435461527131	134372606713703	286743968473489	193780039627477	25338236330604	0.02027	0.018	6162	0.9912	nonDE
105040784	XM_010917470	LOC105040784	uncharacterized LOC105040784	protein_coding	XP_010915772.1	.	83	62	238	195	101	107	280	269	573944880131612	442971049698494	688351473419221	519394316973833	729657703122798	661241479022917	757799037649351	783446617578445	-0.6015	1472	4331	0.3312	nonDE
105040786	XM_019849476	LOC105040786	serine/threonine-protein phosphatase PP1	protein_coding	XP_019705035.1	.	200	161	445	389	235	92	477	491	138299971116051	115029579034609	128704372130905	10361250733478	1697718418157	568544075421574	129096478913836	143000851015248	-0.1655	0.1988	5226	0.8904	nonDE
105040790	XM_029263277	LOC105040790	protein SGT1 homolog	protein_coding	XP_029119110.1	.	70	38	145	139	30	0	55	45	484049898906179	271498385299077	419373796831038	370234923381348	216730010828554	0	148853382395408	131059843089331	2.01	0.9943	2265	0.5124	nonDE
105040791	XM_010917484,XR_003800227	LOC105040791	uncharacterized LOC105040791, transcript variant X2	protein_coding	XP_010915786.1	.	277	270	409	422	198	227	499	468	191545459995731	192906747449344	118292333037169	112402257314337	143041807146846	140282070783367	135050614209652	136302236812904	-0.1335	0.364	5508	0.7969	nonDE
105040795	XM_010917490,XM_010917491	LOC105040795	GTPase Der, transcript variant X2	protein_coding	XP_010915792.1		73	45	108	70	18	35	92	127	504794894573586	321511245748907	312361172812084	186449241990607	130038006497132	216293941736468	248991112370501	369880001607667	-0.1793	0.2007	3083	0.89	nonDE
105040796	XM_019849547,XM_029263279,XM_029263280	LOC105040796	SMR domain-containing protein At5g58720, transcript variant X1	protein_coding	XP_019705106.1		43	25	52	59	23	44	64	53	29734493789951	178617358749393	150396120242855	157150075392083	166159674968558	271912383897274	173211208605566	154359370749656	-0.1902	0.2467	2584	0.8641	nonDE
105040797	XM_010917494	LOC105040797	mitochondrial arginine transporter BAC2	protein_coding	XP_010915796.1	.	160	165	80	115	78	107	62	119	110639976892841	117887456774599	231378646527469	306309468984568	56349802815424	661241479022917	167798358336642	346580473947342	0.388	0.2743	3.87	0.8443	nonDE
105040799	XM_019849363,XM_029263281,XM_029263282	LOC105040799	helicase and polymerase-containing protein TEBICHI, transcript variant X3	protein_coding	XP_019704922.1		94	95	248	192	73	68	301	279	65000986424544	678745963247692	717273804235155	511403635174235	527376359682814	420228229659424	814633965473052	812571027153852	-0.2397	0.365	4314	0.7968	nonDE
105040808	XM_010917504	LOC105040808	probable chlorophyll(ide) b reductase NYC1, chloroplastic	protein_coding	XP_010915806.1	.	656	689	228	211	292	268	195	136	453623905260647	492269440713326	659429142603287	562011286571686	210950543873126	165619361101067	527752901220084	396091970225534	0.7054	0.3944	5.31	0.7793	nonDE
105040811	XM_010917507	LOC105040811	ras-related protein Rab7	protein_coding	XP_010915809.1	.	110	92	134	107	32	36	79	78	760649841138281	657311880197765	387559232933511	285000984185642	231178678217124	222473768643225	213807585622495	227170394688174	0.8109	1507	3391	0.3201	nonDE
105040812	XM_010917508	LOC105040812	subtilisin-like protease SBT6.1	protein_coding	XP_010915810.1	.	102	125	231	220	98	96	154	155	70532985269186	893086793746964	668105841848068	585983331970478	707984702039942	593263383048599	416789470707143	451428348418807	0.2421	0.5731	4278	0.7061	nonDE
105040817	XM_010917513,XM_010917514,XM_010917515,XM_010917517,XM_019848941,XM_029263288,XM_029263289,XM_029263290	LOC105040817	pentatricopeptide repeat-containing protein At5g25630, transcript variant X3	protein_coding	XP_010915815.1		499	434	77	115	254	268	98	55	345058427934547	310079734788946	222701947282689	306309468984568	183498075834842	165619361101067	265229663177273	160184252664738	0.4354	0.1564	4563	0.9127	nonDE
105040821	XM_010917523,XM_010917524	LOC105040821	protein disulfide isomerase-like 1-5, transcript variant X1	protein_coding	XP_010915825.1		45	58	174	147	28	0	109	103	311174935011115	414392272298591	503248556197246	391543408180274	202281343439984	0	295000339656354	299981418626691	1224	0.5485	2562	0.7166	nonDE
105040822	XM_010917525	LOC105040822	uncharacterized LOC105040822	protein_coding	XP_010915827.1	.	114	199	363	380	179	205	301	419	788309835361491	142179417564517	104988060861839	101215302794901	129315573127704	126686451588503	814633965473052	122031276120955	-0.2879	0.5516	5106	0.7147	nonDE
105040823	XM_010917526,XM_019849239	LOC105040823	protein LIKE COV 1, transcript variant X1	protein_coding	XP_010915828.1		87	90	327	332	105	229	327	238	601604874354822	643022491497814	945760217681031	884302119155449	758555037899938	141518036164718	885001018969063	693160947894684	-0.3854	0.5966	4709	0.6938	nonDE
105040824	XM_010917527	LOC105040824	coiled-coil domain-containing protein 25	protein_coding	XP_010915829.1	.	47	64	138	114	24	40	91	124	32500493212272	457260438398445	399128165259885	303645908384702	173384008662843	24719307627025	246284687236039	361142678735045	0.1575	0.2181	3267	0.8817	nonDE
105040832	XM_010917535,XM_010917536,XM_010917537,XM_010917538,XM_010917539	LOC105040832	TOM1-like protein 9, transcript variant X2	protein_coding	XP_010915837.1		215	244	313	282	195	226	352	421	148672468949755	174330542139407	905268954538724	751124089162158	14087450703856	139664088092691	952661647330612	122613764312463	-0.3288	0.7415	5238	0.6297	nonDE
105040836	XM_010917545,XM_010917547,XM_010917548,XM_010917549,XM_019849298	LOC105040836	protein PEROXIN-4, transcript variant X3	protein_coding	XP_010915847.1		239	142	517	490	94	73	351	558	165268465483681	101454659769655	149528450318377	130514469393425	679087367262802	451127364193205	94995522219615	16251420543077	0.4093	0.4633	5066	0.7525	nonDE
105040837	XM_010917550	LOC105040837	peroxisomal fatty acid beta-oxidation multifunctional protein	protein_coding	XP_010915852.1	.	43	93	1302	1615	232	155	1558	1772	29734493789951	664456574547741	376568747223456	430165036878328	167604541707415	957873170547217	421661035949174	51608453767621	-0.9077	0.4028	5838	0.7769	nonDE
105040840	XM_010917555,XM_019848968,XM_029263293	LOC105040840	uncharacterized LOC105040840, transcript variant X2	protein_coding	XP_010915857.1		41	38	71	84	12	41	96	92	283514940787905	271498385299077	205348548793129	223739090388728	0.866920043314215	253372903177006	259816812908349	267944568093743	-0.2729	0.3848	2814	0.7862	nonDE
105040845	XM_010917561,XM_019848895	LOC105040845	putative E3 ubiquitin-protein ligase LIN-1, transcript variant X2	protein_coding	XP_010915863.1		269	193	305	423	211	122	495	348	186013461151089	137892600954531	882131089885977	112668613374324	152433440949416	753938882624261	133968044155867	101352945322416	-0.06561	0.09195	5235	0.9496	nonDE
105040847	XM_010917566,XM_029263294,XM_029263295,XR_003800246,XR_003800247	LOC105040847	probable inactive nicotinamidase At3g16190, transcript variant X4	protein_coding	XP_010915868.1		34	44	77	81	30	53	86	101	235109950897287	314366551398931	222701947282689	215748408589131	216730010828554	327530826058081	232752561563729	29415653671161	-0.3468	0.665	3019	0.6564	nonDE
105040848	XM_010917571	LOC105040848	chaperone protein ClpB1	protein_coding	XP_010915873.1	.	1014	1002	483	242	20	34	20	21	701180853558379	715898373867566	13969485784096	644581665167526	144486673885703	210114114829712	541285026892393	611612601083545	4826	1269	4027	0.4099	nonDE
105040849	XM_019849426	LOC105040849	protein RTF1 homolog	protein_coding	XP_019704985.1	.	8	32	62	93	30	45	79	51	0.553199884464204	228630219199223	179318451058789	24771113578752	216730010828554	278092210804031	213807585622495	148534488834575	-0.1649	0.1345	2529	0.9255	nonDE
105040855	XM_010917580	LOC105040855	eukaryotic translation initiation factor 2 subunit alpha homolog	protein_coding	XP_010915882.1	.	642	761	711	694	190	381	790	839	443942907282524	543711240033151	205637772101288	184851105630687	137262340191417	235451405147413	213807585622495	244353796337664	0.3807	0.5622	6309	0.7092	nonDE
105040856	XM_010917591,XM_029264360,XR_003800764	LOC105040856	vesicle-fusing ATPase, transcript variant X1	protein_coding	XP_010915893.1		116	129	544	498	142	125	249	479	802139832473096	921665571146866	157337479638679	132645317873317	102585538458849	77247836334453	67389985848103	139505921866199	0.1063	0.1038	5012	0.9441	nonDE
105040857	XM_010917581	LOC105040857	auxin-responsive protein IAA17	protein_coding	XP_010915883.1	.	2196	1570	1809	1705	1331	1542	1230	1566	151853368285424	112171701294619	52320496446024	454137082277121	96155881470935	952929309021812	332890291538822	456088253950872	0.1583	0.1472	7786	0.92	nonDE
105040862	XM_010917586,XM_010917587,XR_003800249,XR_003800250,XR_003800251,XR_003800252	LOC105040862	casein kinase 1-like protein 4, transcript variant X1	protein_coding	XP_010915888.1		499	480	1165	1281	415	624	1712	1337	345058427934547	342945328798834	336945154005627	34120211284281	299809848312833	385621198981589	463339983019889	38939335602319	-0.3578	0.9369	6833	0.5446	nonDE
105040863	XM_010917588	LOC105040863	probable lactoylglutathione lyase, chloroplastic	protein_coding	XP_010915890.1	.	488	239	256	196	257	260	139	77	337451929523165	170758194964419	740411668887902	522057877573699	185665375943128	160675499575662	376193093690213	224257953730633	0.6881	0.4283	4882	0.7667	nonDE
105040865	XM_010917590,XM_019849266,XM_019849267,XM_019849268,XM_019849269,XM_019849270,XM_019849271,XM_019849273,XM_029263300,XM_029263301,XM_029263302,XM_029263303,XM_029263305	LOC105040865	activating signal cointegrator 1 complex subunit 1, transcript variant X3	protein_coding	XP_010915892.1		48	57	104	119	39	43	46	81	331919930678522	407247577948615	30079224048571	316963711384031	28174901407712	265732556990518	12449555618525	235907717560796	0.6704	1161	3107	0.4433	nonDE
105040866	XM_010917601,XM_010917603,XM_010917604,XM_010917605,XM_019849264,XM_019849265,XR_831280,XR_831282	LOC105040866	protein phosphatase 2C and cyclic nucleotide-binding/kinase domain-containing protein, transcript variant X8	protein_coding	XP_010915903.1		262	251	102	138	157	193	125	112	181172962162027	17933182818439	295007774322523	367571362781482	113422039000276	119270659300395	338303141807746	326193387244557	0.08299	0.04409	4457	0.9765	nonDE
105040867	XM_010917606	LOC105040867	probable aquaporin TIP2-2	protein_coding	XP_010915908.1	.	153	116	318	313	0	27	136	180	105799477903779	828784544597182	91973011994669	833694467757998	0	166855326482418	368073818286827	524239372357324	1715	1044	3284	0.4921	nonDE
105040871	XM_010917609	LOC105040871	tRNAse Z TRZ4, mitochondrial	protein_coding	XP_010915911.1	.	439	466	474	446	242	305	503	368	303568436599732	332942756708868	137091848067526	118794802754015	1748288754017	188484720656065	136133184263437	107177827237497	0.2255	0.3331	5773	0.8128	nonDE
105040873	XM_010917613	LOC105040873	ABC transporter E family member 2	protein_coding	XP_010915915.1	.	358	268	782	887	392	282	949	743	247556948297731	191477808579349	226172626980601	236257825208097	283193880815977	174271118770526	256839745260441	216394363145273	-0.2335	0.4822	6165	0.7442	nonDE
105040877	XM_010917617,XM_029263308,XM_029263309,XM_029263310,XR_003800254	LOC105040877	60S ribosomal protein L27-3, transcript variant X4	protein_coding	XP_010915919.1		696	582	1811	1752	209	438	1209	1058	481283899483858	415821211168586	523783411076559	46665581709649	150988574210559	270676418515923	327206798756452	308136253307805	0.6387	1.18	6771	0.4363	nonDE
105040879	XM_010917618	LOC105040879	glycosyltransferase-like At2g41451	protein_coding	XP_010915920.1	.	151	148	340	380	144	129	250	360	104416478192619	10574147637964	983359247741744	101215302794901	104030405197706	797197670971555	676606283615492	104847874471465	0.03574	0.05961	4908	0.9682	nonDE
105040882	XM_010917621	LOC105040882	putative pentatricopeptide repeat-containing protein At3g15200	protein_coding	XP_010915923.1	.	66	62	109	100	81	17	147	58	456389904682968	442971049698494	315253405893677	266356059986581	585171029237095	105057057414856	397844494765909	16892157553736	0.1979	0.1973	3271	0.8917	nonDE
105040883	XM_010917622	LOC105040883	DNA replication licensing factor MCM6	protein_coding	XP_010915924.1	.	0	12	171	125	12	18	124	158	0	0.857363321997085	494571856952466	332945074983226	0.866920043314215	111236884321612	335596716673284	460165671291429	-1159	0.3976	2041	0.7793	nonDE
105040885	XM_010917625,XM_010917627,XM_019848856,XM_029263312,XM_029263313	LOC105040885	YTH domain-containing protein ECT4, transcript variant X1	protein_coding	XP_010915927.1		101	107	83	177	57	81	192	151	698414854136058	764482295447401	240055345772249	471450226176248	411787020574252	500565979447255	519633625816698	439778584588644	-0.2141	0.2771	3933	0.8417	nonDE
105040886	XM_010917631	LOC105040886	uncharacterized LOC105040886	protein_coding	XP_010915933.1	.	0	12	176	255	48	42	255	198	0	0.857363321997085	509033022360432	679207952965781	346768017325686	259552730083762	690138409287802	576663309593056	-1198	0.4096	2739	0.7744	nonDE
105040890	XM_019849283	LOC105040890	protein TSS	protein_coding	XP_019704842.1	.	2832	2931	255	208	1407	1326	169	137	195832759100328	209410991397788	737519435806308	554020604772088	101646375078592	819445047835877	457385847724072	399004411183074	0.8848	0.2376	6399	0.8673	nonDE
105040892	XM_010917637,XM_010917638	LOC105040892	cytochrome b561 and DOMON domain-containing protein At3g61750, transcript variant X1	protein_coding	XP_010915939.1		0	36	73	92	17	7	60	124	0	257208996599126	211133014956316	245047575187654	122813672802847	0.432587883472937	162385508067718	361142678735045	-0.7372	0.2424	1.75	0.8671	nonDE
105040897	XM_010917644	LOC105040897	phosphatidylinositol 4-kinase gamma 4	protein_coding	XP_010915946.1	.	95	135	331	337	138	171	136	269	656924862801242	964533737246721	957329150007404	897619922154778	996958049811347	105675040105532	368073818286827	783446617578445	0.113	0.1167	4663	0.9364	nonDE
105040898	XM_010917645	LOC105040898	dipeptidyl aminopeptidase 4	protein_coding	XP_010915947.1	.	101	133	456	344	74	34	420	261	698414854136058	950244348546769	131885828520657	916264846353838	534600693377099	210114114829712	113669855647403	76014708991812	0.4625	0.4068	4529	0.7755	nonDE
105040899	XM_010917646,XM_010917647,XM_010917648,XM_010917649,XM_029263316	LOC105040899	uncharacterized LOC105040899, transcript variant X2	protein_coding	XP_010915948.1		79	142	67	66	22	0	130	71	546284885908402	101454659769655	193779616466756	175794999591143	158935341274273	0	351835267480056	206783307985389	0.9078	0.2585	2431	0.8604	nonDE
105040901	XM_010917651	LOC105040901	E3 ubiquitin-protein ligase SINAT5	protein_coding	XP_010915953.1	.	86	58	255	252	39	105	239	225	594689875799019	414392272298591	737519435806308	671217271166184	28174901407712	648881825209405	64683560713641	655299215446655	-0.06538	0.06329	4.15	0.9654	nonDE
105040902	XM_010917653,XM_029263317	LOC105040902	CLP protease regulatory subunit CLPX1, mitochondrial, transcript variant X1	protein_coding	XP_010915955.1		208	198	255	194	96	127	161	188	143831969960693	141464948129519	737519435806308	516730756373967	693536034651372	784838017158042	435734446648377	547538900017649	0.4122	0.6879	4573	0.6485	nonDE
105040907	XM_010917657,XM_010917658	LOC105040907	protein DEFECTIVE IN MERISTEM SILENCING 3, transcript variant X1	protein_coding	XP_010915959.1		29	28	64	52	13	44	60	86	200534958118274	20005144179932	185102917221975	138505151193022	0.939163380257066	271912383897274	162385508067718	250469922348499	-0.3428	0.3988	2524	0.7793	nonDE
105040909	XM_010917664	LOC105040909	protein SPA1-RELATED 4	protein_coding	XP_010915966.2	.	364	413	96	86	307	215	122	113	251705947431213	295075876653997	277654375832963	22906621158846	221787044414553	132866278495259	33018386640436	329105828202098	-0.103	0.03889	4647	0.9782	nonDE
105040914	XM_010917663,XR_003800257,XR_831291,XR_831292,XR_831293	LOC105040914	exportin-2, transcript variant X3	protein_coding	XP_010915965.1	.	139	112	333	290	103	85	279	285	961184799256555	800205767197279	963113616170591	772432573961085	744106370511368	52528528707428	755092612514889	830045672899096	0.07968	0.1329	4633	0.9265	nonDE
105040917	XM_010917668,XM_010917669,XM_029263321	LOC105040917	KH domain-containing protein HEN4, transcript variant X1	protein_coding	XP_010915970.1		0	50	120	106	37	44	97	65	0	357234717498785	347067969791204	282337423585776	26730034668855	271912383897274	262523238042811	189308662240145	-0.5849	0.2434	2352	0.8671	nonDE
105040924	XM_010917680	LOC105040924	auxin response factor 9	protein_coding	XP_010915982.1	.	43	24	49	75	27	17	52	86	29734493789951	171472664399417	141719420998075	199767044989936	195057009745698	105057057414856	140734106992022	250469922348499	-0.09124	0.08079	2519	0.9562	nonDE
105040927	XM_010917684	LOC105040927	protein NLP3	protein_coding	XP_010915986.2	.	30	25	127	87	72	60	160	89	207449956674077	178617358749393	367313601362358	231729772188325	520152025988529	370789614405374	433028021513915	259207245221121	-0.5293	0.8051	3266	0.6021	nonDE
105040929	XM_010917686	LOC105040929	eukaryotic translation initiation factor 1A	protein_coding	XP_010915988.1	.	52	41	189	176	22	58	181	126	359579924901733	292932468349004	546632052421146	468786665576382	158935341274273	358429960591862	489862949337616	366967560650127	-0.01586	0.01391	3517	0.9941	nonDE
105040932	XM_010917691	LOC105040932	RNA-binding KH domain-containing protein RCF3	protein_coding	XP_010915993.1	.	132	118	204	194	38	82	185	123	912779809365937	843073933297133	590015548645047	516730756373967	274524680382835	506745806354012	500688649875464	358230237777505	0.4857	1133	4063	0.4545	nonDE
105040936	XM_010917697	LOC105040936	elongation factor G, mitochondrial	protein_coding	XP_010915999.1	.	508	520	796	762	228	248	663	528	35128192663477	371524106198737	230221753294832	202963317709775	164714808229701	153259707287555	179435986414828	153776882558148	0.5569	1984	6076	0.2015	nonDE
105040937	XM_010917699	LOC105040937	CASP-like protein 1C1	protein_coding	XP_010916001.1	.	0	0	51	60	0	0	95	60	0	0	147503887161262	159813635991949	0	0	257110387773887	174746457452441	-0.7623	0.1169	-0.3413	0.9364	nonDE
105040940	XM_010917702,XM_029263334	LOC105040940	nicotianamine aminotransferase A, transcript variant X2	protein_coding	XP_010916004.1		77	48	164	153	15	0	128	215	532454888796796	342945328798834	474326225381312	407524771779469	108365005414277	0	346422417211132	626174805871248	0.916	0.3818	2672	0.7876	nonDE
105040942	XM_010917707	LOC105040942	probable LIM domain-containing serine/threonine-protein kinase DDB_G0286997	protein_coding	XP_010916009.1	.	118	129	237	251	149	155	437	340	815969829584701	921665571146866	685459240337628	668553710566318	107642572044848	957873170547217	118270778375988	990229925563834	-0.6809	2513	4829	0.1361	nonDE
105040943	XM_010917704,XM_019849380	LOC105040943	D-amino-acid transaminase, chloroplastic, transcript variant X1	protein_coding	XP_010916006.1		22	20	795	1004	30	0	558	701	152129968227656	142893886999514	229932529986673	267421484226527	216730010828554	0	151018522502978	204162111123602	-0.5258	0.1113	3517	0.9403	nonDE
105040944	XM_010917705,XM_029263335	LOC105040944	protein DEHYDRATION-INDUCED 19, transcript variant X1	protein_coding	XP_010916007.1		36	57	104	119	60	97	151	146	248939948008892	407247577948615	30079224048571	316963711384031	433460021657108	599443209955355	408670195303757	42521637980094	-0.6828	1687	3597	0.266	nonDE
105040948	XM_010917713	LOC105040948	dnaJ homolog subfamily B member 13	protein_coding	XP_010916015.1	.	65	120	135	122	13	0	57	42	449474906127166	857363321997085	390451466015104	324954393183629	0.939163380257066	0	154266232664332	122322520216709	2396	1034	2268	0.4956	nonDE
105040952	XM_010917719	LOC105040952	triose phosphate/phosphate translocator, chloroplastic	protein_coding	XP_010916021.1	.	566	445	26	46	427	394	17	18	391388918258424	317938898573919	751980601214275	122523787593827	308479048745975	243485180126196	460092272858534	524239372357324	1165	0.2832	3885	0.8378	nonDE
105040953	XM_010917720	LOC105040953	guanylate-binding protein 4	protein_coding	XP_010916022.1	.	95	166	271	305	203	278	459	339	656924862801242	118601926209597	783795165111802	812385982959072	146653973993988	171799188007823	124224913671804	987317484606293	-0.836	2178	5063	0.1755	nonDE
[truncated: 5,882 more rows]

## Sheet: exclusive_genes_matrix
Table 2. Exclusive genes to each tissue, separately for each matrix.
Exclusive genes of root UFES_250			n=130		Excluvise gene of root SM		n=69			Gene exclusivo Leaf UFES_250		n=44			Gene exclusivo Leaf SM		n=15
[truncated: 131 more rows]

## Sheet: exclusive_genes_tissue
Table 3. Exclusive genes per tissue considering the two matrices (UFES_250 and SM).
[truncated: 672 more rows]

[truncated: 3 more sheets: 11_DEG, GO_11DEG, GO_nonDE]
